# Supplementary material
Source: PubMed Central journal article supplement (PMC7082777)
Supplement: NIHMS1066422-supplement-Table_S18.pdf [file NIHMS1066422-supplement-Table_S18.pdf]

**Table S18. Results of the gene-based test of association for same-sex sexual behaviour (performed in MAGMA).**

| Gene      | Non-heterosexual behaviour |                 |             |                 |             |                 |
|-----------|----------------------------|-----------------|-------------|-----------------|-------------|-----------------|
|           | Males and females combined |                 | Males       |                 | Females     |                 |
|           | Z-statistic                | <i>p</i> -value | Z-statistic | <i>p</i> -value | Z-statistic | <i>p</i> -value |
| ELAVL4    | 4.96                       | 3.53E-07        | 4.16        | 1.59E-05        | 1.81        | 3.49E-02        |
| LRCH1     | 4.86                       | 5.91E-07        | 3.81        | 6.87E-05        | 2.86        | 2.11E-03        |
| OR5A1     | 4.79                       | 8.32E-07        | 5.28        | 6.57E-08        | 0.27        | 3.92E-01        |
| OR4D6     | 4.48                       | 3.74E-06        | 4.96        | 3.51E-07        | 0.10        | 4.60E-01        |
| CD276     | 4.45                       | 4.37E-06        | 2.60        | 4.61E-03        | 3.29        | 4.97E-04        |
| ADK       | 4.29                       | 8.75E-06        | 3.37        | 3.72E-04        | 2.02        | 2.18E-02        |
| CTNNB1    | 4.25                       | 1.06E-05        | 4.32        | 7.89E-06        | 0.49        | 3.13E-01        |
| TCF4      | 4.24                       | 1.11E-05        | 2.60        | 4.60E-03        | 3.23        | 6.18E-04        |
| OR5AN1    | 4.17                       | 1.53E-05        | 4.63        | 1.81E-06        | 0.55        | 2.92E-01        |
| LRRTM4    | 4.16                       | 1.57E-05        | 0.65        | 2.59E-01        | 5.42        | 2.92E-08        |
| PRKD1     | 4.12                       | 1.90E-05        | 2.61        | 4.57E-03        | 2.45        | 7.18E-03        |
| OR2B2     | 4.10                       | 2.10E-05        | 3.24        | 6.08E-04        | 2.68        | 3.72E-03        |
| HIST1H2BN | 4.06                       | 2.50E-05        | 2.16        | 1.52E-02        | 3.22        | 6.43E-04        |
| TMEM258   | 4.05                       | 2.58E-05        | 1.27        | 1.01E-01        | 4.02        | 2.87E-05        |
| OSBP2     | 4.02                       | 2.88E-05        | 0.94        | 1.73E-01        | 3.53        | 2.10E-04        |
| ATP2A1    | 4.00                       | 3.22E-05        | 0.58        | 2.82E-01        | 4.57        | 2.48E-06        |
| DCC       | 3.92                       | 4.35E-05        | 1.49        | 6.83E-02        | 3.62        | 1.49E-04        |
| HIST1H3I  | 3.92                       | 4.37E-05        | 2.01        | 2.24E-02        | 3.21        | 6.57E-04        |
| OR5A2     | 3.89                       | 4.97E-05        | 4.41        | 5.23E-06        | -0.09       | 5.37E-01        |
| CNTN3     | 3.86                       | 5.58E-05        | 2.29        | 1.10E-02        | 2.01        | 2.24E-02        |
| HIST1H4L  | 3.86                       | 5.67E-05        | 2.60        | 4.64E-03        | 2.53        | 5.64E-03        |
| HIST1H1B  | 3.86                       | 5.71E-05        | 1.83        | 3.37E-02        | 3.17        | 7.75E-04        |
| FADS2     | 3.81                       | 6.82E-05        | 1.32        | 9.41E-02        | 3.81        | 7.02E-05        |
| PHF12     | 3.81                       | 6.82E-05        | 3.33        | 4.35E-04        | 1.30        | 9.66E-02        |
| FADS1     | 3.74                       | 9.20E-05        | 1.26        | 1.05E-01        | 3.92        | 4.37E-05        |
| AGBL4     | 3.73                       | 9.63E-05        | 3.50        | 2.30E-04        | 1.25        | 1.06E-01        |

|           |      |          |      |          |       |          |
|-----------|------|----------|------|----------|-------|----------|
| SH2B1     | 3.67 | 1.22E-04 | 0.60 | 2.75E-01 | 4.22  | 1.23E-05 |
| RERE      | 3.65 | 1.31E-04 | 3.18 | 7.28E-04 | 1.07  | 1.42E-01 |
| ATXN2L    | 3.64 | 1.37E-04 | 0.73 | 2.33E-01 | 4.12  | 1.89E-05 |
| SDCCAG8   | 3.58 | 1.73E-04 | 1.52 | 6.45E-02 | 3.10  | 9.71E-04 |
| TMEM167B  | 3.55 | 1.93E-04 | 2.13 | 1.67E-02 | 2.83  | 2.30E-03 |
| UGT2A2    | 3.53 | 2.08E-04 | 2.30 | 1.06E-02 | 2.04  | 2.05E-02 |
| TUFM      | 3.52 | 2.17E-04 | 0.77 | 2.19E-01 | 4.01  | 3.07E-05 |
| PPFIA2    | 3.50 | 2.28E-04 | 1.74 | 4.13E-02 | 3.26  | 5.51E-04 |
| HIST1H2AL | 3.48 | 2.46E-04 | 1.23 | 1.10E-01 | 3.29  | 5.08E-04 |
| HIST1H2BL | 3.48 | 2.53E-04 | 1.60 | 5.51E-02 | 3.12  | 9.19E-04 |
| MRPL52    | 3.47 | 2.62E-04 | 3.26 | 5.65E-04 | 0.87  | 1.93E-01 |
| UGT2A1    | 3.46 | 2.72E-04 | 2.22 | 1.33E-02 | 2.04  | 2.09E-02 |
| UGT2A1    | 3.43 | 2.97E-04 | 2.20 | 1.40E-02 | 2.02  | 2.18E-02 |
| OR10Q1    | 3.41 | 3.29E-04 | 1.92 | 2.77E-02 | 2.81  | 2.51E-03 |
| RABEP2    | 3.40 | 3.36E-04 | 0.09 | 4.65E-01 | 4.08  | 2.22E-05 |
| ZNF841    | 3.40 | 3.39E-04 | 3.71 | 1.03E-04 | -0.15 | 5.60E-01 |
| ETV6      | 3.39 | 3.49E-04 | 2.37 | 8.87E-03 | 0.69  | 2.44E-01 |
| HIST1H2AJ | 3.39 | 3.51E-04 | 1.56 | 5.90E-02 | 3.16  | 7.85E-04 |
| BTN3A2    | 3.37 | 3.72E-04 | 2.51 | 5.97E-03 | 1.90  | 2.85E-02 |
| BDNF      | 3.37 | 3.72E-04 | 1.31 | 9.45E-02 | 2.61  | 4.48E-03 |
| SEZ6      | 3.37 | 3.75E-04 | 2.43 | 7.56E-03 | 1.75  | 4.00E-02 |
| NAT1      | 3.34 | 4.18E-04 | 2.84 | 2.27E-03 | 1.06  | 1.45E-01 |
| MYRF      | 3.34 | 4.19E-04 | 1.70 | 4.45E-02 | 2.79  | 2.65E-03 |
| ANGPTL4   | 3.33 | 4.33E-04 | 2.59 | 4.73E-03 | 1.42  | 7.82E-02 |
| KCTD17    | 3.33 | 4.36E-04 | 1.89 | 2.92E-02 | 2.25  | 1.23E-02 |
| OR4S1     | 3.33 | 4.42E-04 | 1.56 | 5.91E-02 | 2.97  | 1.49E-03 |
| BCL11B    | 3.32 | 4.49E-04 | 2.39 | 8.46E-03 | 3.18  | 7.24E-04 |
| TTC39A    | 3.32 | 4.56E-04 | 1.69 | 4.54E-02 | 2.14  | 1.61E-02 |
| SLC29A2   | 3.31 | 4.72E-04 | 2.81 | 2.51E-03 | 1.70  | 4.46E-02 |
| BTN2A1    | 3.30 | 4.83E-04 | 2.85 | 2.16E-03 | 0.91  | 1.83E-01 |
| PNLIPRP1  | 3.30 | 4.86E-04 | 2.66 | 3.87E-03 | 2.08  | 1.87E-02 |

|               |      |          |       |          |       |          |
|---------------|------|----------|-------|----------|-------|----------|
| MCF2L2        | 3.30 | 4.90E-04 | 0.33  | 3.70E-01 | 3.66  | 1.29E-04 |
| RP11-867G23.8 | 3.29 | 5.02E-04 | 2.78  | 2.69E-03 | 1.61  | 5.42E-02 |
| ZNF432        | 3.27 | 5.39E-04 | 3.60  | 1.60E-04 | -0.36 | 6.42E-01 |
| COL3A1        | 3.26 | 5.52E-04 | 1.19  | 1.16E-01 | 2.97  | 1.50E-03 |
| ASCL3         | 3.26 | 5.55E-04 | 1.25  | 1.07E-01 | 2.91  | 1.82E-03 |
| PARK2         | 3.25 | 5.74E-04 | 1.84  | 3.27E-02 | 0.26  | 3.98E-01 |
| DAPK2         | 3.24 | 5.87E-04 | 1.89  | 2.97E-02 | 1.66  | 4.87E-02 |
| TMEM9B        | 3.24 | 5.93E-04 | 1.60  | 5.53E-02 | 2.61  | 4.52E-03 |
| SLC2A8        | 3.23 | 6.14E-04 | 1.67  | 4.74E-02 | 2.28  | 1.14E-02 |
| MMP14         | 3.22 | 6.31E-04 | 2.02  | 2.16E-02 | 1.68  | 4.69E-02 |
| JMJD4         | 3.22 | 6.48E-04 | 1.88  | 3.03E-02 | 1.51  | 6.61E-02 |
| CD19          | 3.21 | 6.70E-04 | -0.51 | 6.96E-01 | 4.10  | 2.04E-05 |
| MAD1L1        | 3.21 | 6.75E-04 | 2.07  | 1.94E-02 | 2.51  | 6.08E-03 |
| FOXO6         | 3.20 | 6.82E-04 | 1.56  | 5.93E-02 | 2.85  | 2.19E-03 |
| SULT1A2       | 3.17 | 7.66E-04 | 0.09  | 4.65E-01 | 3.88  | 5.18E-05 |
| TREML4        | 3.16 | 7.79E-04 | 1.29  | 9.92E-02 | 2.51  | 5.98E-03 |
| SRBD1         | 3.15 | 8.16E-04 | 1.64  | 5.04E-02 | 1.97  | 2.44E-02 |
| CNTN5         | 3.15 | 8.20E-04 | 1.80  | 3.56E-02 | 2.65  | 4.04E-03 |
| NGEF          | 3.14 | 8.56E-04 | 1.57  | 5.78E-02 | 2.61  | 4.48E-03 |
| SLC15A5       | 3.13 | 8.64E-04 | 1.93  | 2.70E-02 | 1.88  | 2.98E-02 |
| BRWD1         | 3.13 | 8.67E-04 | 2.43  | 7.57E-03 | 1.74  | 4.10E-02 |
| VTI1A         | 3.12 | 8.94E-04 | 2.89  | 1.93E-03 | 1.45  | 7.34E-02 |
| NPIP8         | 3.12 | 8.96E-04 | 0.04  | 4.83E-01 | 4.08  | 2.23E-05 |
| OR5M3         | 3.10 | 9.80E-04 | 3.17  | 7.70E-04 | 0.54  | 2.94E-01 |
| DACH1         | 3.09 | 9.85E-04 | 2.24  | 1.25E-02 | 0.94  | 1.74E-01 |
| APOBR         | 3.09 | 1.01E-03 | 0.02  | 4.92E-01 | 3.86  | 5.62E-05 |
| BHLHA9        | 3.08 | 1.03E-03 | 1.19  | 1.16E-01 | 2.69  | 3.61E-03 |
| OR8D1         | 3.07 | 1.06E-03 | 3.66  | 1.27E-04 | -0.42 | 6.64E-01 |
| DUS4L         | 3.06 | 1.09E-03 | 2.43  | 7.46E-03 | 1.58  | 5.75E-02 |
| ZNF280D       | 3.06 | 1.09E-03 | 4.27  | 9.76E-06 | -1.13 | 8.71E-01 |
| BRMS1         | 3.06 | 1.09E-03 | 2.46  | 6.97E-03 | 1.17  | 1.20E-01 |

|          |      |          |       |          |       |          |
|----------|------|----------|-------|----------|-------|----------|
| DHRS13   | 3.06 | 1.09E-03 | 2.33  | 9.84E-03 | 1.35  | 8.78E-02 |
| ABCB8    | 3.06 | 1.10E-03 | 2.86  | 2.10E-03 | 1.09  | 1.37E-01 |
| PARD3B   | 3.03 | 1.22E-03 | 1.03  | 1.51E-01 | 2.78  | 2.71E-03 |
| RAP2A    | 3.02 | 1.25E-03 | 1.41  | 7.99E-02 | 2.18  | 1.47E-02 |
| MUC12    | 3.02 | 1.28E-03 | 0.60  | 2.76E-01 | 2.93  | 1.71E-03 |
| LGI4     | 3.01 | 1.29E-03 | 0.93  | 1.75E-01 | 2.99  | 1.40E-03 |
| SPI1     | 3.00 | 1.34E-03 | 2.59  | 4.77E-03 | 1.60  | 5.50E-02 |
| CDH12    | 3.00 | 1.34E-03 | 1.37  | 8.57E-02 | 3.16  | 7.83E-04 |
| CHRD12   | 3.00 | 1.35E-03 | 1.31  | 9.53E-02 | 1.71  | 4.36E-02 |
| CABP7    | 2.99 | 1.38E-03 | 0.08  | 4.69E-01 | 3.17  | 7.68E-04 |
| CEND1    | 2.99 | 1.41E-03 | 1.84  | 3.27E-02 | 1.45  | 7.33E-02 |
| CLN3     | 2.99 | 1.42E-03 | 0.42  | 3.38E-01 | 3.57  | 1.77E-04 |
| ZNF423   | 2.98 | 1.42E-03 | 1.73  | 4.16E-02 | 1.84  | 3.29E-02 |
| ST5      | 2.98 | 1.45E-03 | 0.91  | 1.81E-01 | 2.29  | 1.09E-02 |
| ANKRD33B | 2.97 | 1.48E-03 | 2.63  | 4.25E-03 | 0.41  | 3.40E-01 |
| STEAP4   | 2.97 | 1.48E-03 | 1.82  | 3.41E-02 | 1.80  | 3.62E-02 |
| CLN3     | 2.97 | 1.48E-03 | 0.19  | 4.24E-01 | 3.62  | 1.45E-04 |
| PSMC3    | 2.97 | 1.50E-03 | 2.55  | 5.36E-03 | 1.09  | 1.38E-01 |
| FEN1     | 2.97 | 1.51E-03 | 0.91  | 1.83E-01 | 3.02  | 1.26E-03 |
| PIWIL3   | 2.96 | 1.53E-03 | 0.72  | 2.35E-01 | 2.96  | 1.54E-03 |
| C11orf16 | 2.96 | 1.53E-03 | 1.13  | 1.30E-01 | 2.48  | 6.48E-03 |
| HSD17B11 | 2.96 | 1.54E-03 | 1.31  | 9.54E-02 | 2.13  | 1.66E-02 |
| PPP1R3A  | 2.96 | 1.55E-03 | 1.42  | 7.80E-02 | 2.04  | 2.04E-02 |
| IGSF6    | 2.96 | 1.55E-03 | 3.41  | 3.22E-04 | -0.86 | 8.05E-01 |
| CCDC101  | 2.94 | 1.62E-03 | -0.10 | 5.38E-01 | 3.70  | 1.06E-04 |
| TRIO     | 2.94 | 1.63E-03 | 0.68  | 2.47E-01 | 2.40  | 8.20E-03 |
| OR5M11   | 2.94 | 1.66E-03 | 2.95  | 1.61E-03 | 0.68  | 2.47E-01 |
| ASCC2    | 2.93 | 1.69E-03 | 0.14  | 4.43E-01 | 3.08  | 1.02E-03 |
| GARNL3   | 2.92 | 1.76E-03 | 1.44  | 7.54E-02 | 1.26  | 1.04E-01 |
| CCNJ     | 2.92 | 1.78E-03 | 1.75  | 3.98E-02 | 1.78  | 3.72E-02 |
| SLC39A13 | 2.92 | 1.78E-03 | 2.62  | 4.40E-03 | 1.50  | 6.74E-02 |

|         |      |          |      |          |       |          |
|---------|------|----------|------|----------|-------|----------|
| SNAP47  | 2.90 | 1.85E-03 | 1.51 | 6.54E-02 | 1.37  | 8.48E-02 |
| SIPA1   | 2.90 | 1.88E-03 | 2.76 | 2.86E-03 | 0.28  | 3.90E-01 |
| ZMAT5   | 2.89 | 1.92E-03 | 0.27 | 3.94E-01 | 3.02  | 1.26E-03 |
| EIF2AK4 | 2.89 | 1.93E-03 | 1.87 | 3.06E-02 | 1.36  | 8.75E-02 |
| RFX3    | 2.89 | 1.95E-03 | 2.82 | 2.39E-03 | 0.64  | 2.60E-01 |
| HNRNPD  | 2.88 | 1.96E-03 | 3.06 | 1.10E-03 | 0.16  | 4.37E-01 |
| OTOA    | 2.88 | 1.97E-03 | 2.71 | 3.36E-03 | 1.53  | 6.30E-02 |
| MROH2B  | 2.88 | 1.99E-03 | 1.45 | 7.38E-02 | 2.38  | 8.62E-03 |
| RHOH    | 2.88 | 2.00E-03 | 1.20 | 1.15E-01 | 2.36  | 9.25E-03 |
| COL16A1 | 2.88 | 2.02E-03 | 2.23 | 1.28E-02 | 1.08  | 1.40E-01 |
| CEP170  | 2.87 | 2.03E-03 | 1.99 | 2.36E-02 | 1.32  | 9.36E-02 |
| NCAM2   | 2.87 | 2.04E-03 | 2.19 | 1.44E-02 | 1.60  | 5.43E-02 |
| PIPOX   | 2.87 | 2.04E-03 | 1.88 | 3.00E-02 | 1.90  | 2.90E-02 |
| SFTPC   | 2.87 | 2.07E-03 | 2.44 | 7.40E-03 | 0.50  | 3.10E-01 |
| FXYD3   | 2.86 | 2.11E-03 | 0.58 | 2.81E-01 | 2.97  | 1.47E-03 |
| SSR2    | 2.86 | 2.12E-03 | 2.00 | 2.27E-02 | 1.75  | 4.00E-02 |
| DNM3    | 2.86 | 2.12E-03 | 0.67 | 2.50E-01 | 1.92  | 2.75E-02 |
| ATG9B   | 2.86 | 2.13E-03 | 2.80 | 2.59E-03 | -0.28 | 6.12E-01 |
| CRB1    | 2.86 | 2.13E-03 | 2.11 | 1.74E-02 | 1.00  | 1.59E-01 |
| STOX2   | 2.86 | 2.15E-03 | 2.51 | 5.96E-03 | 0.84  | 2.00E-01 |
| BCAP29  | 2.85 | 2.16E-03 | 1.83 | 3.34E-02 | 1.55  | 6.12E-02 |
| INPP5D  | 2.85 | 2.17E-03 | 0.90 | 1.83E-01 | 2.55  | 5.38E-03 |
| RPS14   | 2.85 | 2.17E-03 | 0.76 | 2.23E-01 | 2.72  | 3.30E-03 |
| ZKSCAN4 | 2.85 | 2.22E-03 | 1.63 | 5.19E-02 | 1.53  | 6.34E-02 |
| TMF1    | 2.84 | 2.25E-03 | 0.83 | 2.04E-01 | 2.01  | 2.23E-02 |
| DMRT1   | 2.84 | 2.27E-03 | 1.87 | 3.08E-02 | 1.82  | 3.43E-02 |
| PIAS1   | 2.83 | 2.32E-03 | 2.57 | 5.09E-03 | 0.87  | 1.93E-01 |
| SOS2    | 2.83 | 2.34E-03 | 1.86 | 3.17E-02 | 1.24  | 1.07E-01 |
| MBTD1   | 2.83 | 2.35E-03 | 2.37 | 8.98E-03 | 1.94  | 2.62E-02 |
| DDX11   | 2.82 | 2.38E-03 | 2.52 | 5.93E-03 | 0.49  | 3.10E-01 |
| PDE4B   | 2.82 | 2.38E-03 | 1.41 | 7.93E-02 | 1.01  | 1.56E-01 |

|          |      |          |      |          |       |          |
|----------|------|----------|------|----------|-------|----------|
| MEIS2    | 2.82 | 2.39E-03 | 1.16 | 1.23E-01 | 0.73  | 2.34E-01 |
| NAMPT    | 2.82 | 2.41E-03 | 1.76 | 3.89E-02 | 1.47  | 7.10E-02 |
| UBXN2A   | 2.81 | 2.48E-03 | 2.08 | 1.88E-02 | 0.82  | 2.07E-01 |
| EXD2     | 2.80 | 2.52E-03 | 2.20 | 1.38E-02 | 0.87  | 1.92E-01 |
| YIPF1    | 2.80 | 2.55E-03 | 1.38 | 8.35E-02 | 1.85  | 3.19E-02 |
| PALM2    | 2.80 | 2.57E-03 | 1.33 | 9.15E-02 | 0.95  | 1.70E-01 |
| SERPINA1 | 2.79 | 2.60E-03 | 1.85 | 3.21E-02 | 2.11  | 1.76E-02 |
| LY6D     | 2.79 | 2.60E-03 | 1.66 | 4.89E-02 | 1.61  | 5.36E-02 |
| C12orf55 | 2.79 | 2.63E-03 | 1.11 | 1.33E-01 | 2.83  | 2.36E-03 |
| CCDC88C  | 2.79 | 2.63E-03 | 0.94 | 1.74E-01 | 2.53  | 5.77E-03 |
| HAND1    | 2.79 | 2.63E-03 | 2.07 | 1.94E-02 | 1.21  | 1.12E-01 |
| SNX32    | 2.79 | 2.63E-03 | 2.98 | 1.43E-03 | -0.31 | 6.23E-01 |
| CTBP1    | 2.79 | 2.65E-03 | 1.18 | 1.19E-01 | 3.17  | 7.50E-04 |
| PSMG1    | 2.79 | 2.65E-03 | 2.15 | 1.59E-02 | 1.46  | 7.24E-02 |
| ZNF620   | 2.79 | 2.66E-03 | 3.06 | 1.12E-03 | 0.43  | 3.33E-01 |
| TENM4    | 2.78 | 2.69E-03 | 2.57 | 5.08E-03 | 0.82  | 2.07E-01 |
| KIRREL3  | 2.78 | 2.72E-03 | 1.94 | 2.59E-02 | 1.58  | 5.74E-02 |
| SUFU     | 2.77 | 2.82E-03 | 2.16 | 1.54E-02 | 1.04  | 1.49E-01 |
| OR6B1    | 2.77 | 2.85E-03 | 1.64 | 5.00E-02 | 1.98  | 2.37E-02 |
| CLCA4    | 2.76 | 2.86E-03 | 1.24 | 1.08E-01 | 1.89  | 2.91E-02 |
| ZSCAN31  | 2.76 | 2.87E-03 | 1.15 | 1.24E-01 | 2.20  | 1.39E-02 |
| SERPINB6 | 2.75 | 2.94E-03 | 1.69 | 4.57E-02 | 1.38  | 8.40E-02 |
| SMC2     | 2.75 | 2.99E-03 | 0.50 | 3.08E-01 | 3.15  | 8.08E-04 |
| TREML2   | 2.75 | 3.00E-03 | 1.88 | 3.04E-02 | 2.22  | 1.31E-02 |
| MSI1     | 2.75 | 3.02E-03 | 2.54 | 5.58E-03 | 0.77  | 2.22E-01 |
| LRRC56   | 2.75 | 3.02E-03 | 0.13 | 4.50E-01 | 3.36  | 3.87E-04 |
| RPRD2    | 2.74 | 3.04E-03 | 1.44 | 7.50E-02 | 2.00  | 2.27E-02 |
| SLC2A13  | 2.74 | 3.07E-03 | 2.57 | 5.08E-03 | -0.12 | 5.48E-01 |
| SERPINI1 | 2.74 | 3.08E-03 | 1.78 | 3.79E-02 | 0.71  | 2.38E-01 |
| MKLN1    | 2.73 | 3.19E-03 | 2.50 | 6.22E-03 | 0.21  | 4.15E-01 |
| L3MBTL3  | 2.73 | 3.19E-03 | 1.34 | 8.98E-02 | 2.21  | 1.36E-02 |

|           |      |          |      |          |      |          |
|-----------|------|----------|------|----------|------|----------|
| BNIPL     | 2.72 | 3.28E-03 | 2.44 | 7.38E-03 | 0.15 | 4.41E-01 |
| LEPREL1   | 2.72 | 3.28E-03 | 0.10 | 4.60E-01 | 3.15 | 8.22E-04 |
| TACR3     | 2.72 | 3.29E-03 | 1.27 | 1.02E-01 | 1.46 | 7.17E-02 |
| L2HGDH    | 2.72 | 3.29E-03 | 2.62 | 4.46E-03 | 0.20 | 4.23E-01 |
| GABRA4    | 2.71 | 3.32E-03 | 1.06 | 1.46E-01 | 2.08 | 1.86E-02 |
| B3GALT4   | 2.71 | 3.35E-03 | 2.12 | 1.70E-02 | 1.69 | 4.53E-02 |
| NRIP3     | 2.71 | 3.37E-03 | 0.52 | 3.02E-01 | 2.85 | 2.19E-03 |
| UPB1      | 2.71 | 3.37E-03 | 0.76 | 2.22E-01 | 2.63 | 4.24E-03 |
| MFSD2B    | 2.71 | 3.41E-03 | 1.50 | 6.71E-02 | 1.12 | 1.32E-01 |
| SIX4      | 2.70 | 3.50E-03 | 1.44 | 7.52E-02 | 1.66 | 4.87E-02 |
| GCN1L1    | 2.70 | 3.51E-03 | 1.43 | 7.68E-02 | 1.91 | 2.83E-02 |
| IGFL2     | 2.69 | 3.56E-03 | 1.77 | 3.80E-02 | 1.16 | 1.22E-01 |
| CCDC77    | 2.69 | 3.58E-03 | 1.77 | 3.87E-02 | 0.89 | 1.87E-01 |
| LRRC47    | 2.69 | 3.61E-03 | 2.87 | 2.03E-03 | 1.17 | 1.22E-01 |
| C1orf56   | 2.69 | 3.62E-03 | 1.59 | 5.56E-02 | 1.72 | 4.25E-02 |
| GALNT3    | 2.68 | 3.67E-03 | 1.32 | 9.27E-02 | 1.97 | 2.42E-02 |
| TMEM178A  | 2.68 | 3.70E-03 | 1.28 | 9.95E-02 | 2.29 | 1.10E-02 |
| TET2      | 2.68 | 3.71E-03 | 2.55 | 5.34E-03 | 2.26 | 1.18E-02 |
| ZNF804A   | 2.68 | 3.71E-03 | 2.15 | 1.57E-02 | 2.58 | 5.00E-03 |
| SKAP2     | 2.67 | 3.74E-03 | 2.22 | 1.31E-02 | 0.75 | 2.26E-01 |
| OR5AR1    | 2.67 | 3.74E-03 | 2.65 | 4.01E-03 | 0.46 | 3.21E-01 |
| MSH4      | 2.67 | 3.76E-03 | 1.18 | 1.18E-01 | 2.05 | 2.02E-02 |
| MNAT1     | 2.67 | 3.77E-03 | 1.86 | 3.14E-02 | 0.56 | 2.87E-01 |
| ADAM11    | 2.67 | 3.84E-03 | 2.17 | 1.51E-02 | 1.23 | 1.10E-01 |
| ACSL5     | 2.67 | 3.85E-03 | 1.43 | 7.69E-02 | 1.62 | 5.22E-02 |
| PHRF1     | 2.66 | 3.89E-03 | 0.89 | 1.86E-01 | 3.08 | 1.05E-03 |
| AP3M1     | 2.66 | 3.92E-03 | 2.30 | 1.06E-02 | 0.63 | 2.65E-01 |
| GIPR      | 2.66 | 3.93E-03 | 1.71 | 4.39E-02 | 1.10 | 1.36E-01 |
| ALLC      | 2.66 | 3.95E-03 | 0.39 | 3.48E-01 | 2.91 | 1.80E-03 |
| HIST1H2BF | 2.65 | 4.01E-03 | 1.62 | 5.24E-02 | 2.55 | 5.43E-03 |
| SLC4A2    | 2.65 | 4.01E-03 | 1.87 | 3.05E-02 | 0.97 | 1.66E-01 |

|          |      |          |       |          |       |          |
|----------|------|----------|-------|----------|-------|----------|
| CFL1     | 2.65 | 4.05E-03 | 2.77  | 2.81E-03 | -0.41 | 6.59E-01 |
| MAML3    | 2.65 | 4.06E-03 | 2.91  | 1.80E-03 | -0.65 | 7.42E-01 |
| CDRT1    | 2.64 | 4.11E-03 | 2.29  | 1.11E-02 | 0.81  | 2.09E-01 |
| DMRTC2   | 2.64 | 4.13E-03 | 1.12  | 1.32E-01 | 2.09  | 1.84E-02 |
| FGF9     | 2.64 | 4.14E-03 | 1.46  | 7.25E-02 | 1.54  | 6.14E-02 |
| BTBD11   | 2.64 | 4.16E-03 | 0.61  | 2.72E-01 | 2.16  | 1.54E-02 |
| CC2D2B   | 2.63 | 4.21E-03 | 0.39  | 3.47E-01 | 2.45  | 7.14E-03 |
| MRAP     | 2.63 | 4.24E-03 | 1.07  | 1.42E-01 | 1.75  | 3.97E-02 |
| ISL1     | 2.63 | 4.29E-03 | 2.05  | 2.04E-02 | 0.66  | 2.56E-01 |
| SCAF11   | 2.62 | 4.38E-03 | 0.87  | 1.91E-01 | 2.14  | 1.62E-02 |
| SMARCD3  | 2.62 | 4.38E-03 | -0.85 | 8.03E-01 | 3.17  | 7.72E-04 |
| MUS81    | 2.62 | 4.41E-03 | 2.81  | 2.44E-03 | 0.19  | 4.25E-01 |
| SNTG1    | 2.61 | 4.50E-03 | 2.26  | 1.19E-02 | 1.03  | 1.51E-01 |
| ATAD2B   | 2.61 | 4.51E-03 | 1.86  | 3.14E-02 | 0.80  | 2.12E-01 |
| OR8H2    | 2.61 | 4.52E-03 | 2.58  | 4.91E-03 | 0.46  | 3.22E-01 |
| PPARD    | 2.61 | 4.55E-03 | -0.12 | 5.47E-01 | 2.85  | 2.17E-03 |
| KDM4B    | 2.61 | 4.57E-03 | 0.86  | 1.94E-01 | 1.81  | 3.53E-02 |
| SPNS1    | 2.60 | 4.69E-03 | -0.92 | 8.21E-01 | 3.67  | 1.23E-04 |
| KIAA1462 | 2.60 | 4.72E-03 | 0.45  | 3.27E-01 | 2.54  | 5.47E-03 |
| ACSF3    | 2.59 | 4.83E-03 | 2.50  | 6.13E-03 | 0.09  | 4.63E-01 |
| IL27     | 2.59 | 4.84E-03 | 0.48  | 3.14E-01 | 2.95  | 1.58E-03 |
| GPR158   | 2.59 | 4.85E-03 | -0.23 | 5.93E-01 | 3.84  | 6.08E-05 |
| ZNF536   | 2.58 | 4.87E-03 | 0.24  | 4.06E-01 | 2.54  | 5.55E-03 |
| OR5T2    | 2.58 | 4.87E-03 | 2.56  | 5.28E-03 | 0.46  | 3.24E-01 |
| CADM2    | 2.58 | 4.88E-03 | 3.10  | 9.68E-04 | 0.11  | 4.57E-01 |
| CSRNP3   | 2.58 | 4.89E-03 | 0.32  | 3.73E-01 | 2.98  | 1.45E-03 |
| TANC2    | 2.58 | 4.91E-03 | 1.22  | 1.10E-01 | 1.74  | 4.08E-02 |
| IQGAP3   | 2.58 | 4.94E-03 | 0.81  | 2.09E-01 | 2.60  | 4.65E-03 |
| AKT3     | 2.58 | 4.96E-03 | 1.72  | 4.29E-02 | 1.23  | 1.09E-01 |
| ATP2A3   | 2.58 | 4.98E-03 | 1.06  | 1.45E-01 | 1.60  | 5.48E-02 |
| C4orf40  | 2.58 | 4.98E-03 | 1.45  | 7.39E-02 | 1.23  | 1.10E-01 |



|          |      |          |       |          |       |          |
|----------|------|----------|-------|----------|-------|----------|
| SLC30A7  | 2.57 | 5.05E-03 | 2.25  | 1.21E-02 | 0.55  | 2.93E-01 |
| TNRC6C   | 2.57 | 5.08E-03 | 2.77  | 2.79E-03 | 0.44  | 3.30E-01 |
| ARID2    | 2.57 | 5.11E-03 | 1.05  | 1.47E-01 | 1.93  | 2.70E-02 |
| FAM20C   | 2.57 | 5.11E-03 | 2.78  | 2.74E-03 | -0.01 | 5.05E-01 |
| DNAH11   | 2.57 | 5.13E-03 | 2.26  | 1.20E-02 | 2.03  | 2.13E-02 |
| DDO      | 2.57 | 5.14E-03 | 0.23  | 4.10E-01 | 3.29  | 4.94E-04 |
| WWP2     | 2.56 | 5.18E-03 | 2.85  | 2.20E-03 | 0.63  | 2.65E-01 |
| CLN6     | 2.56 | 5.20E-03 | 2.30  | 1.07E-02 | 0.90  | 1.85E-01 |
| MTHFR    | 2.56 | 5.23E-03 | -1.29 | 9.02E-01 | 3.58  | 1.74E-04 |
| CACNA2D4 | 2.56 | 5.27E-03 | 1.29  | 9.90E-02 | 1.63  | 5.19E-02 |
| ZNF330   | 2.56 | 5.27E-03 | 1.89  | 2.97E-02 | 1.15  | 1.24E-01 |
| RIN1     | 2.56 | 5.30E-03 | 2.25  | 1.24E-02 | 0.30  | 3.81E-01 |
| ALDH9A1  | 2.55 | 5.32E-03 | 1.13  | 1.30E-01 | 2.15  | 1.59E-02 |
| APTX     | 2.55 | 5.36E-03 | 2.22  | 1.33E-02 | 0.72  | 2.35E-01 |
| EHBP1    | 2.55 | 5.38E-03 | 2.36  | 9.19E-03 | 0.10  | 4.60E-01 |
| BRINP1   | 2.55 | 5.38E-03 | 0.89  | 1.86E-01 | 1.34  | 9.05E-02 |
| CDHR5    | 2.55 | 5.39E-03 | 1.05  | 1.47E-01 | 2.75  | 2.96E-03 |
| SAP30L   | 2.55 | 5.46E-03 | 1.48  | 7.01E-02 | 1.08  | 1.39E-01 |
| HCN1     | 2.54 | 5.48E-03 | 0.55  | 2.91E-01 | 2.62  | 4.40E-03 |
| TARS2    | 2.54 | 5.51E-03 | 1.28  | 1.00E-01 | 1.82  | 3.47E-02 |
| ACAD8    | 2.54 | 5.52E-03 | 0.30  | 3.83E-01 | 2.44  | 7.42E-03 |
| NFATC2IP | 2.54 | 5.53E-03 | -0.62 | 7.33E-01 | 3.46  | 2.72E-04 |
| SLC12A3  | 2.54 | 5.58E-03 | 0.82  | 2.05E-01 | 2.11  | 1.76E-02 |
| VAX1     | 2.54 | 5.61E-03 | 1.05  | 1.47E-01 | 2.26  | 1.18E-02 |
| ATP8B3   | 2.54 | 5.62E-03 | 3.27  | 5.30E-04 | -0.71 | 7.60E-01 |
| DYNC1LI1 | 2.53 | 5.64E-03 | 2.20  | 1.38E-02 | 0.38  | 3.50E-01 |
| PRPF3    | 2.53 | 5.65E-03 | 1.20  | 1.14E-01 | 1.80  | 3.62E-02 |
| TCF7     | 2.53 | 5.66E-03 | 1.56  | 6.00E-02 | 1.51  | 6.54E-02 |
| CCNJL    | 2.53 | 5.67E-03 | 1.63  | 5.17E-02 | 1.19  | 1.17E-01 |
| LRRC55   | 2.53 | 5.71E-03 | 0.03  | 4.89E-01 | 2.91  | 1.82E-03 |
| POLR2A   | 2.52 | 5.85E-03 | 0.99  | 1.60E-01 | 1.67  | 4.72E-02 |

|            |      |          |       |          |       |          |
|------------|------|----------|-------|----------|-------|----------|
| PPARA      | 2.52 | 5.95E-03 | 0.04  | 4.85E-01 | 2.44  | 7.31E-03 |
| KIAA1522   | 2.51 | 5.97E-03 | 1.49  | 6.77E-02 | 1.61  | 5.36E-02 |
| GALK1      | 2.51 | 5.97E-03 | 0.84  | 2.00E-01 | 2.23  | 1.28E-02 |
| VKORC1     | 2.51 | 5.99E-03 | 3.08  | 1.03E-03 | -0.32 | 6.27E-01 |
| NDC80      | 2.51 | 6.01E-03 | 0.93  | 1.75E-01 | 1.71  | 4.38E-02 |
| SOD1       | 2.51 | 6.01E-03 | 1.35  | 8.87E-02 | 2.00  | 2.28E-02 |
| CXXC4      | 2.51 | 6.05E-03 | 2.59  | 4.77E-03 | 0.53  | 2.97E-01 |
| PRMT5      | 2.51 | 6.07E-03 | 0.72  | 2.37E-01 | 2.40  | 8.27E-03 |
| DGCR2      | 2.51 | 6.10E-03 | 1.49  | 6.76E-02 | 1.11  | 1.33E-01 |
| WDR36      | 2.50 | 6.16E-03 | 1.22  | 1.12E-01 | 2.35  | 9.36E-03 |
| HIST1H2BJ  | 2.50 | 6.23E-03 | 1.35  | 8.89E-02 | 1.58  | 5.72E-02 |
| SLC44A5    | 2.50 | 6.25E-03 | 0.77  | 2.19E-01 | 2.40  | 8.17E-03 |
| CDK12      | 2.50 | 6.27E-03 | 2.73  | 3.15E-03 | -0.12 | 5.47E-01 |
| SP9        | 2.49 | 6.31E-03 | 1.65  | 4.94E-02 | 0.89  | 1.86E-01 |
| RAB11B     | 2.49 | 6.33E-03 | 1.24  | 1.08E-01 | 1.77  | 3.83E-02 |
| MLANA      | 2.49 | 6.35E-03 | 2.24  | 1.27E-02 | 0.65  | 2.56E-01 |
| LSM7       | 2.49 | 6.35E-03 | 1.43  | 7.63E-02 | 1.05  | 1.46E-01 |
| CALML4     | 2.49 | 6.44E-03 | 2.31  | 1.05E-02 | 0.82  | 2.06E-01 |
| AC062017.1 | 2.49 | 6.45E-03 | -0.12 | 5.49E-01 | 3.18  | 7.48E-04 |
| C12orf66   | 2.49 | 6.45E-03 | 0.85  | 1.97E-01 | 2.41  | 7.90E-03 |
| FGFR1      | 2.49 | 6.45E-03 | 1.20  | 1.15E-01 | 2.29  | 1.09E-02 |
| ERBB4      | 2.49 | 6.46E-03 | 1.55  | 6.05E-02 | 1.44  | 7.48E-02 |
| CLCN6      | 2.48 | 6.50E-03 | -1.38 | 9.17E-01 | 3.78  | 7.73E-05 |
| CKS2       | 2.48 | 6.58E-03 | 0.93  | 1.75E-01 | 0.99  | 1.62E-01 |
| ZNF615     | 2.48 | 6.64E-03 | 3.93  | 4.24E-05 | -0.62 | 7.31E-01 |
| FBXL20     | 2.48 | 6.65E-03 | 2.59  | 4.87E-03 | 0.07  | 4.72E-01 |
| IQSEC3     | 2.47 | 6.68E-03 | 1.68  | 4.63E-02 | 2.27  | 1.15E-02 |
| RPL35A     | 2.47 | 6.71E-03 | 1.60  | 5.50E-02 | 1.48  | 6.95E-02 |
| LEMD2      | 2.47 | 6.75E-03 | 1.19  | 1.17E-01 | 1.18  | 1.19E-01 |
| LCN6       | 2.47 | 6.78E-03 | 1.38  | 8.32E-02 | 1.70  | 4.49E-02 |
| OR5F1      | 2.47 | 6.79E-03 | 2.43  | 7.50E-03 | 0.49  | 3.12E-01 |

|          |      |          |       |          |       |          |
|----------|------|----------|-------|----------|-------|----------|
| OR5M8    | 2.46 | 6.86E-03 | 2.39  | 8.44E-03 | 0.72  | 2.37E-01 |
| MAP2K2   | 2.46 | 6.90E-03 | -0.99 | 8.39E-01 | 2.97  | 1.47E-03 |
| SULT1A1  | 2.46 | 6.92E-03 | -0.43 | 6.67E-01 | 3.40  | 3.33E-04 |
| KIAA0195 | 2.46 | 6.98E-03 | 1.63  | 5.14E-02 | 0.93  | 1.75E-01 |
| SNRPN    | 2.46 | 6.99E-03 | -0.20 | 5.81E-01 | 1.52  | 6.38E-02 |
| OXGR1    | 2.46 | 7.00E-03 | 1.02  | 1.53E-01 | 2.23  | 1.27E-02 |
| KIF17    | 2.46 | 7.03E-03 | 2.16  | 1.54E-02 | -0.49 | 6.88E-01 |
| TPD52L3  | 2.46 | 7.03E-03 | -1.07 | 8.58E-01 | 4.04  | 2.62E-05 |
| TCF12    | 2.45 | 7.08E-03 | 4.44  | 4.43E-06 | -1.09 | 8.62E-01 |
| RPLP0    | 2.45 | 7.13E-03 | 1.16  | 1.22E-01 | 1.52  | 6.41E-02 |
| OR52B6   | 2.45 | 7.20E-03 | 1.39  | 8.27E-02 | 1.71  | 4.40E-02 |
| OR8J1    | 2.45 | 7.20E-03 | 2.40  | 8.30E-03 | 0.46  | 3.22E-01 |
| ADCY2    | 2.45 | 7.23E-03 | 1.47  | 7.12E-02 | 2.31  | 1.04E-02 |
| CECR1    | 2.44 | 7.28E-03 | 0.68  | 2.47E-01 | 1.93  | 2.66E-02 |
| CALHM1   | 2.44 | 7.30E-03 | 2.09  | 1.83E-02 | 0.69  | 2.44E-01 |
| RBM23    | 2.44 | 7.32E-03 | 1.09  | 1.38E-01 | 2.01  | 2.22E-02 |
| SP8      | 2.44 | 7.34E-03 | 1.26  | 1.04E-01 | 2.02  | 2.17E-02 |
| VCPKMT   | 2.44 | 7.38E-03 | 1.42  | 7.74E-02 | 1.23  | 1.09E-01 |
| CTSK     | 2.44 | 7.40E-03 | -0.28 | 6.10E-01 | 2.82  | 2.37E-03 |
| KIAA1598 | 2.43 | 7.52E-03 | 0.48  | 3.15E-01 | 2.10  | 1.79E-02 |
| ABT1     | 2.43 | 7.54E-03 | 1.54  | 6.22E-02 | 1.33  | 9.23E-02 |
| SCARF2   | 2.43 | 7.57E-03 | 2.26  | 1.18E-02 | 0.83  | 2.03E-01 |
| DTHD1    | 2.43 | 7.61E-03 | 1.71  | 4.34E-02 | 0.54  | 2.94E-01 |
| SH3BP2   | 2.43 | 7.61E-03 | 1.92  | 2.75E-02 | 0.92  | 1.78E-01 |
| AMN1     | 2.43 | 7.63E-03 | 2.28  | 1.12E-02 | 0.52  | 3.00E-01 |
| MGST3    | 2.43 | 7.65E-03 | 2.72  | 3.24E-03 | -0.59 | 7.21E-01 |
| LCN10    | 2.42 | 7.68E-03 | 1.45  | 7.30E-02 | 1.72  | 4.31E-02 |
| URB1     | 2.42 | 7.77E-03 | 1.49  | 6.78E-02 | 1.51  | 6.61E-02 |
| ANO10    | 2.42 | 7.79E-03 | 1.49  | 6.75E-02 | 1.20  | 1.15E-01 |
| CCDC174  | 2.42 | 7.82E-03 | 1.75  | 4.01E-02 | 1.01  | 1.56E-01 |
| RASSF7   | 2.42 | 7.85E-03 | 0.15  | 4.42E-01 | 2.85  | 2.17E-03 |

|          |      |          |       |          |       |          |
|----------|------|----------|-------|----------|-------|----------|
| NKAPL    | 2.41 | 7.87E-03 | 1.45  | 7.28E-02 | 1.49  | 6.82E-02 |
| PHYHIP   | 2.41 | 7.97E-03 | 1.94  | 2.60E-02 | 0.01  | 4.97E-01 |
| FAM227B  | 2.41 | 7.97E-03 | -0.21 | 5.82E-01 | 2.86  | 2.13E-03 |
| TSPAN32  | 2.41 | 8.02E-03 | 1.23  | 1.10E-01 | 1.40  | 8.01E-02 |
| C9orf163 | 2.41 | 8.04E-03 | 0.85  | 1.98E-01 | 1.51  | 6.56E-02 |
| GALNT7   | 2.41 | 8.05E-03 | 2.12  | 1.68E-02 | 1.22  | 1.12E-01 |
| HSD17B4  | 2.41 | 8.06E-03 | 2.56  | 5.28E-03 | -0.10 | 5.41E-01 |
| OR10D3   | 2.40 | 8.10E-03 | 3.10  | 9.83E-04 | -0.51 | 6.93E-01 |
| OR8K5    | 2.40 | 8.11E-03 | 2.49  | 6.40E-03 | 0.42  | 3.37E-01 |
| LRRC39   | 2.40 | 8.11E-03 | 1.93  | 2.71E-02 | -0.09 | 5.35E-01 |
| HYDIN    | 2.40 | 8.12E-03 | 2.41  | 7.95E-03 | -0.21 | 5.82E-01 |
| METTL15  | 2.40 | 8.13E-03 | 3.47  | 2.63E-04 | -0.51 | 6.97E-01 |
| CLEC10A  | 2.40 | 8.14E-03 | 1.54  | 6.22E-02 | 0.97  | 1.66E-01 |
| PGBD1    | 2.40 | 8.17E-03 | 2.03  | 2.12E-02 | 1.09  | 1.38E-01 |
| DBT      | 2.40 | 8.18E-03 | 1.91  | 2.81E-02 | 0.35  | 3.62E-01 |
| IBTK     | 2.40 | 8.20E-03 | 1.74  | 4.07E-02 | 0.74  | 2.29E-01 |
| MLNR     | 2.39 | 8.32E-03 | 1.45  | 7.40E-02 | 1.59  | 5.64E-02 |
| HMGN1    | 2.39 | 8.34E-03 | 1.88  | 2.97E-02 | 0.76  | 2.23E-01 |
| WDFY4    | 2.39 | 8.40E-03 | -0.49 | 6.87E-01 | 2.09  | 1.84E-02 |
| SKP1     | 2.39 | 8.41E-03 | 1.64  | 5.04E-02 | 1.45  | 7.35E-02 |
| FBXO6    | 2.39 | 8.47E-03 | 1.31  | 9.43E-02 | 0.93  | 1.76E-01 |
| OR5M9    | 2.39 | 8.51E-03 | 2.32  | 1.01E-02 | 0.74  | 2.29E-01 |
| FXYD1    | 2.39 | 8.54E-03 | 0.82  | 2.06E-01 | 2.36  | 9.26E-03 |
| MYBPC3   | 2.38 | 8.54E-03 | 1.49  | 6.81E-02 | 1.98  | 2.38E-02 |
| BNC2     | 2.38 | 8.57E-03 | 2.06  | 1.99E-02 | 1.12  | 1.32E-01 |
| SLC25A22 | 2.38 | 8.58E-03 | 1.82  | 3.42E-02 | 0.38  | 3.53E-01 |
| HAUS4    | 2.38 | 8.65E-03 | 0.71  | 2.37E-01 | 2.08  | 1.86E-02 |
| NRXN2    | 2.38 | 8.66E-03 | 3.37  | 3.73E-04 | 0.02  | 4.91E-01 |
| COL24A1  | 2.38 | 8.69E-03 | 2.47  | 6.76E-03 | -0.13 | 5.53E-01 |
| ALDH16A1 | 2.38 | 8.73E-03 | 1.25  | 1.05E-01 | 1.29  | 9.87E-02 |
| CLCA1    | 2.38 | 8.75E-03 | 1.80  | 3.61E-02 | 0.63  | 2.65E-01 |

|          |      |          |       |          |       |          |
|----------|------|----------|-------|----------|-------|----------|
| RECK     | 2.37 | 8.80E-03 | 0.45  | 3.26E-01 | 2.94  | 1.66E-03 |
| MIF      | 2.37 | 8.90E-03 | 0.88  | 1.89E-01 | 1.57  | 5.78E-02 |
| SLC2A9   | 2.37 | 8.90E-03 | 0.35  | 3.62E-01 | 2.74  | 3.05E-03 |
| ATP1A3   | 2.37 | 8.98E-03 | 1.32  | 9.34E-02 | 1.40  | 8.01E-02 |
| RASGRP4  | 2.37 | 8.98E-03 | 2.16  | 1.55E-02 | 0.63  | 2.64E-01 |
| CTAGE1   | 2.37 | 8.99E-03 | 1.79  | 3.71E-02 | 1.25  | 1.05E-01 |
| NFXL1    | 2.37 | 9.00E-03 | 1.84  | 3.32E-02 | 0.36  | 3.59E-01 |
| AMICA1   | 2.37 | 9.01E-03 | 2.43  | 7.45E-03 | 2.22  | 1.31E-02 |
| CCDC41   | 2.36 | 9.05E-03 | 1.08  | 1.40E-01 | 1.18  | 1.20E-01 |
| MGLL     | 2.36 | 9.20E-03 | 1.60  | 5.46E-02 | 1.15  | 1.25E-01 |
| RAB21    | 2.35 | 9.30E-03 | -0.49 | 6.89E-01 | 2.96  | 1.52E-03 |
| OR52I2   | 2.35 | 9.30E-03 | 2.46  | 6.94E-03 | 0.07  | 4.70E-01 |
| OR5T3    | 2.35 | 9.35E-03 | 2.44  | 7.35E-03 | 0.38  | 3.51E-01 |
| RELA     | 2.35 | 9.36E-03 | 1.78  | 3.76E-02 | 0.38  | 3.52E-01 |
| SERPINA6 | 2.35 | 9.49E-03 | 1.02  | 1.55E-01 | 1.78  | 3.73E-02 |
| ERAL1    | 2.34 | 9.52E-03 | 1.53  | 6.34E-02 | 1.74  | 4.08E-02 |
| TMEM39A  | 2.34 | 9.61E-03 | 2.56  | 5.25E-03 | -0.15 | 5.61E-01 |
| ISCA1    | 2.34 | 9.65E-03 | 2.13  | 1.65E-02 | -0.14 | 5.56E-01 |
| FOLH1    | 2.34 | 9.69E-03 | 1.47  | 7.09E-02 | 0.68  | 2.47E-01 |
| UTP18    | 2.34 | 9.70E-03 | 2.26  | 1.18E-02 | 1.60  | 5.54E-02 |
| FAM222B  | 2.34 | 9.70E-03 | 1.24  | 1.07E-01 | 1.78  | 3.76E-02 |
| DACT1    | 2.33 | 9.82E-03 | 1.22  | 1.12E-01 | 1.48  | 6.89E-02 |
| SVIL     | 2.33 | 9.83E-03 | 1.29  | 9.79E-02 | 1.53  | 6.27E-02 |
| AMPH     | 2.33 | 9.86E-03 | 1.09  | 1.38E-01 | 1.08  | 1.40E-01 |
| DNAJA1   | 2.33 | 9.90E-03 | 1.98  | 2.36E-02 | 0.50  | 3.07E-01 |
| ASCC3    | 2.33 | 9.92E-03 | 0.90  | 1.85E-01 | 1.74  | 4.10E-02 |
| SHPRH    | 2.33 | 9.93E-03 | 1.78  | 3.76E-02 | 0.93  | 1.76E-01 |
| OR5AS1   | 2.33 | 9.98E-03 | 2.36  | 9.25E-03 | 0.38  | 3.51E-01 |
| ZDHHC20  | 2.33 | 1.00E-02 | 0.35  | 3.64E-01 | 1.60  | 5.46E-02 |
| ZNF79    | 2.32 | 1.01E-02 | 0.57  | 2.83E-01 | 1.77  | 3.85E-02 |
| VCL      | 2.32 | 1.01E-02 | 2.09  | 1.81E-02 | 0.24  | 4.05E-01 |

|           |      |          |       |          |       |          |
|-----------|------|----------|-------|----------|-------|----------|
| ARAP3     | 2.32 | 1.01E-02 | 2.74  | 3.06E-03 | -0.29 | 6.15E-01 |
| DYNAP     | 2.32 | 1.02E-02 | 1.02  | 1.53E-01 | 2.01  | 2.25E-02 |
| DPPA2     | 2.32 | 1.02E-02 | 0.60  | 2.75E-01 | 1.93  | 2.68E-02 |
| ZNF28     | 2.32 | 1.02E-02 | 2.34  | 9.53E-03 | 0.15  | 4.39E-01 |
| LRRN2     | 2.32 | 1.02E-02 | 0.54  | 2.96E-01 | 2.00  | 2.28E-02 |
| WDTC1     | 2.32 | 1.03E-02 | 1.89  | 2.94E-02 | 0.05  | 4.79E-01 |
| C1RL      | 2.32 | 1.03E-02 | 0.32  | 3.73E-01 | 2.27  | 1.15E-02 |
| OR10J1    | 2.31 | 1.03E-02 | 0.57  | 2.83E-01 | 1.78  | 3.79E-02 |
| RPL12     | 2.31 | 1.03E-02 | 0.61  | 2.72E-01 | 1.85  | 3.23E-02 |
| AKIP1     | 2.31 | 1.04E-02 | 0.38  | 3.51E-01 | 2.20  | 1.39E-02 |
| TRIML1    | 2.31 | 1.04E-02 | 1.60  | 5.47E-02 | 0.44  | 3.28E-01 |
| RASGEF1B  | 2.31 | 1.05E-02 | -0.16 | 5.63E-01 | 2.54  | 5.58E-03 |
| NAV2      | 2.31 | 1.05E-02 | 0.52  | 3.01E-01 | 0.51  | 3.03E-01 |
| C8orf74   | 2.31 | 1.06E-02 | 1.97  | 2.45E-02 | 0.48  | 3.17E-01 |
| KCNK15    | 2.30 | 1.06E-02 | 1.39  | 8.25E-02 | 0.94  | 1.74E-01 |
| WDR25     | 2.30 | 1.07E-02 | 2.50  | 6.30E-03 | -0.35 | 6.36E-01 |
| WNT9B     | 2.30 | 1.07E-02 | 0.53  | 2.99E-01 | 2.10  | 1.77E-02 |
| OR8I2     | 2.30 | 1.07E-02 | 2.33  | 9.85E-03 | 0.25  | 3.99E-01 |
| ERRFI1    | 2.30 | 1.07E-02 | 1.63  | 5.14E-02 | 0.94  | 1.74E-01 |
| OOEP      | 2.30 | 1.08E-02 | 2.54  | 5.55E-03 | -0.54 | 7.04E-01 |
| LINC01118 | 2.30 | 1.08E-02 | 2.22  | 1.32E-02 | -0.03 | 5.11E-01 |
| OR10G3    | 2.29 | 1.09E-02 | 3.52  | 2.15E-04 | -0.63 | 7.36E-01 |
| LOX       | 2.29 | 1.09E-02 | 1.02  | 1.53E-01 | 1.59  | 5.56E-02 |
| C11orf88  | 2.29 | 1.10E-02 | 1.90  | 2.84E-02 | 1.06  | 1.44E-01 |
| GFRA2     | 2.29 | 1.10E-02 | 1.07  | 1.42E-01 | 1.34  | 9.00E-02 |
| C1orf185  | 2.29 | 1.10E-02 | 1.69  | 4.57E-02 | 0.93  | 1.75E-01 |
| GOLIM4    | 2.29 | 1.10E-02 | 2.79  | 2.63E-03 | 0.09  | 4.62E-01 |
| CHMP1A    | 2.29 | 1.10E-02 | 1.10  | 1.35E-01 | 1.49  | 6.82E-02 |
| SEMA5A    | 2.29 | 1.11E-02 | 2.46  | 7.03E-03 | 0.37  | 3.55E-01 |
| RNF7      | 2.28 | 1.12E-02 | 1.92  | 2.76E-02 | 0.88  | 1.89E-01 |
| OR2T4     | 2.28 | 1.12E-02 | 1.56  | 5.96E-02 | 1.32  | 9.30E-02 |

|          |      |          |       |          |       |          |
|----------|------|----------|-------|----------|-------|----------|
| C19orf12 | 2.28 | 1.12E-02 | 2.97  | 1.48E-03 | 0.65  | 2.58E-01 |
| C2orf73  | 2.28 | 1.12E-02 | 2.60  | 4.63E-03 | 0.19  | 4.25E-01 |
| CMTM7    | 2.28 | 1.12E-02 | 2.52  | 5.84E-03 | -0.01 | 5.06E-01 |
| ZNF614   | 2.28 | 1.13E-02 | 3.36  | 3.91E-04 | -1.61 | 9.47E-01 |
| GSTA3    | 2.28 | 1.13E-02 | 2.29  | 1.11E-02 | 0.25  | 4.01E-01 |
| CCDC121  | 2.28 | 1.13E-02 | 1.29  | 9.90E-02 | 1.53  | 6.26E-02 |
| RFX8     | 2.28 | 1.13E-02 | 1.50  | 6.73E-02 | 1.55  | 6.06E-02 |
| USP28    | 2.28 | 1.14E-02 | 0.76  | 2.23E-01 | 2.13  | 1.66E-02 |
| OR10AG1  | 2.28 | 1.14E-02 | 2.35  | 9.49E-03 | 0.38  | 3.52E-01 |
| YBX2     | 2.28 | 1.14E-02 | 1.72  | 4.28E-02 | 0.71  | 2.37E-01 |
| BCAS1    | 2.28 | 1.14E-02 | 0.18  | 4.29E-01 | 1.69  | 4.59E-02 |
| LPXN     | 2.27 | 1.15E-02 | 0.00  | 4.99E-01 | 3.31  | 4.70E-04 |
| GPM6A    | 2.27 | 1.15E-02 | 2.07  | 1.92E-02 | -0.55 | 7.08E-01 |
| POM121L2 | 2.27 | 1.16E-02 | 0.08  | 4.69E-01 | 2.75  | 3.00E-03 |
| WDR24    | 2.27 | 1.17E-02 | 1.54  | 6.23E-02 | 1.00  | 1.58E-01 |
| PRR25    | 2.27 | 1.17E-02 | 0.08  | 4.69E-01 | 3.64  | 1.34E-04 |
| APPL1    | 2.27 | 1.17E-02 | 0.14  | 4.45E-01 | 2.22  | 1.34E-02 |
| ZNF76    | 2.27 | 1.17E-02 | 0.52  | 3.01E-01 | 2.00  | 2.27E-02 |
| AJUBA    | 2.26 | 1.18E-02 | 0.43  | 3.35E-01 | 2.20  | 1.39E-02 |
| SLFN12L  | 2.26 | 1.19E-02 | 1.48  | 6.92E-02 | 0.74  | 2.28E-01 |
| CNBP     | 2.26 | 1.19E-02 | -0.81 | 7.92E-01 | 3.32  | 4.47E-04 |
| MOB4     | 2.26 | 1.20E-02 | 1.57  | 5.87E-02 | 1.19  | 1.17E-01 |
| EXO5     | 2.26 | 1.20E-02 | 1.59  | 5.56E-02 | 1.46  | 7.21E-02 |
| TMEM19   | 2.25 | 1.21E-02 | -0.11 | 5.43E-01 | 2.53  | 5.69E-03 |
| SAMD5    | 2.25 | 1.21E-02 | 1.00  | 1.58E-01 | 0.32  | 3.75E-01 |
| SLIT2    | 2.25 | 1.21E-02 | 2.63  | 4.32E-03 | 0.01  | 4.95E-01 |
| OR51M1   | 2.25 | 1.22E-02 | 1.62  | 5.27E-02 | 1.43  | 7.63E-02 |
| AP3D1    | 2.25 | 1.22E-02 | 1.32  | 9.37E-02 | 0.38  | 3.52E-01 |
| UBE3A    | 2.25 | 1.22E-02 | 1.66  | 4.82E-02 | 0.83  | 2.02E-01 |
| C16orf97 | 2.25 | 1.23E-02 | 2.36  | 9.03E-03 | -0.56 | 7.13E-01 |
| GLRA3    | 2.25 | 1.23E-02 | 2.25  | 1.22E-02 | 0.21  | 4.17E-01 |

|               |      |          |       |          |       |          |
|---------------|------|----------|-------|----------|-------|----------|
| DEF6          | 2.25 | 1.23E-02 | -0.01 | 5.05E-01 | 2.29  | 1.11E-02 |
| ZCCHC10       | 2.25 | 1.23E-02 | 1.14  | 1.26E-01 | 1.57  | 5.84E-02 |
| NFATC2        | 2.25 | 1.23E-02 | 3.09  | 9.91E-04 | 0.82  | 2.06E-01 |
| PARD3         | 2.25 | 1.24E-02 | 1.35  | 8.81E-02 | 0.62  | 2.69E-01 |
| NCOA3         | 2.24 | 1.25E-02 | 1.89  | 2.92E-02 | 0.66  | 2.55E-01 |
| SRP54         | 2.24 | 1.25E-02 | 1.51  | 6.50E-02 | 0.91  | 1.80E-01 |
| SLC7A14       | 2.24 | 1.25E-02 | 1.48  | 6.93E-02 | 0.66  | 2.54E-01 |
| SLC22A16      | 2.24 | 1.25E-02 | 0.08  | 4.68E-01 | 2.93  | 1.67E-03 |
| POLR2L        | 2.24 | 1.26E-02 | 1.60  | 5.49E-02 | 1.08  | 1.40E-01 |
| CCL21         | 2.24 | 1.27E-02 | 1.09  | 1.39E-01 | 1.92  | 2.76E-02 |
| CD151         | 2.23 | 1.28E-02 | 1.66  | 4.87E-02 | 1.02  | 1.53E-01 |
| CTD-2117L12.1 | 2.23 | 1.29E-02 | 2.92  | 1.75E-03 | -0.32 | 6.25E-01 |
| IRF7          | 2.23 | 1.29E-02 | 1.13  | 1.29E-01 | 2.03  | 2.10E-02 |
| KCNJ13        | 2.23 | 1.29E-02 | 1.10  | 1.37E-01 | 1.51  | 6.50E-02 |
| EPM2A         | 2.23 | 1.29E-02 | 1.94  | 2.65E-02 | 0.52  | 3.03E-01 |
| DPH5          | 2.23 | 1.29E-02 | 1.70  | 4.46E-02 | 0.72  | 2.36E-01 |
| MUC5B         | 2.23 | 1.30E-02 | -0.31 | 6.23E-01 | 2.56  | 5.18E-03 |
| NMNAT3        | 2.23 | 1.30E-02 | 1.38  | 8.38E-02 | 1.86  | 3.13E-02 |
| ZXDC          | 2.22 | 1.31E-02 | 2.89  | 1.91E-03 | 1.76  | 3.93E-02 |
| WDR90         | 2.22 | 1.31E-02 | 1.29  | 9.80E-02 | 1.34  | 8.96E-02 |
| SLC38A6       | 2.22 | 1.32E-02 | 1.74  | 4.08E-02 | 0.07  | 4.73E-01 |
| OR5W2         | 2.22 | 1.32E-02 | 2.32  | 1.00E-02 | -0.15 | 5.60E-01 |
| GABPB2        | 2.22 | 1.34E-02 | 2.10  | 1.79E-02 | 0.10  | 4.61E-01 |
| ZCCHC6        | 2.22 | 1.34E-02 | 1.92  | 2.72E-02 | -0.07 | 5.28E-01 |
| REM2          | 2.21 | 1.34E-02 | 1.17  | 1.22E-01 | 2.04  | 2.06E-02 |
| KCNAB1        | 2.21 | 1.34E-02 | 1.78  | 3.76E-02 | 0.50  | 3.10E-01 |
| ATRNL1        | 2.21 | 1.34E-02 | 1.93  | 2.69E-02 | 1.54  | 6.15E-02 |
| LAMC3         | 2.21 | 1.34E-02 | 1.22  | 1.12E-01 | 0.83  | 2.04E-01 |
| ASGR2         | 2.21 | 1.34E-02 | 0.51  | 3.04E-01 | 2.15  | 1.59E-02 |
| ARVCF         | 2.21 | 1.35E-02 | 0.63  | 2.65E-01 | 1.91  | 2.83E-02 |
| JOSD2         | 2.21 | 1.36E-02 | 1.81  | 3.48E-02 | 0.48  | 3.17E-01 |



|            |      |          |       |          |       |          |
|------------|------|----------|-------|----------|-------|----------|
| PCDH9      | 2.21 | 1.36E-02 | 2.43  | 7.48E-03 | -0.04 | 5.16E-01 |
| TSNARE1    | 2.21 | 1.37E-02 | -0.41 | 6.60E-01 | 2.88  | 2.00E-03 |
| TEX22      | 2.21 | 1.37E-02 | 0.62  | 2.67E-01 | 2.24  | 1.26E-02 |
| NTN1       | 2.21 | 1.37E-02 | 0.24  | 4.05E-01 | 1.69  | 4.52E-02 |
| BHLHE22    | 2.20 | 1.38E-02 | 2.16  | 1.55E-02 | 0.05  | 4.78E-01 |
| OR5AK2     | 2.20 | 1.38E-02 | 0.12  | 4.51E-01 | 2.52  | 5.86E-03 |
| CDV3       | 2.20 | 1.38E-02 | 0.81  | 2.09E-01 | 1.68  | 4.63E-02 |
| KCNK10     | 2.20 | 1.38E-02 | 1.72  | 4.32E-02 | 0.45  | 3.25E-01 |
| TOP2B      | 2.20 | 1.38E-02 | 1.42  | 7.73E-02 | 0.91  | 1.81E-01 |
| PGPEP1     | 2.20 | 1.39E-02 | 1.21  | 1.13E-01 | 1.67  | 4.72E-02 |
| ZFP64      | 2.20 | 1.39E-02 | 1.34  | 9.05E-02 | 0.93  | 1.76E-01 |
| ZDHHHC6    | 2.20 | 1.39E-02 | 0.67  | 2.50E-01 | 1.94  | 2.61E-02 |
| ATP5S      | 2.20 | 1.39E-02 | 2.37  | 8.88E-03 | -0.22 | 5.89E-01 |
| CALB1      | 2.20 | 1.39E-02 | 0.49  | 3.11E-01 | 2.64  | 4.12E-03 |
| NFAT5      | 2.20 | 1.40E-02 | 2.21  | 1.37E-02 | 1.40  | 8.03E-02 |
| PBX3       | 2.20 | 1.40E-02 | 3.54  | 2.04E-04 | -1.19 | 8.83E-01 |
| NAA30      | 2.20 | 1.41E-02 | 2.11  | 1.75E-02 | 0.43  | 3.33E-01 |
| PTDSS2     | 2.20 | 1.41E-02 | 0.20  | 4.19E-01 | 3.18  | 7.31E-04 |
| C10orf54   | 2.19 | 1.41E-02 | 2.45  | 7.11E-03 | 0.34  | 3.68E-01 |
| GUCY1B3    | 2.19 | 1.41E-02 | 1.21  | 1.13E-01 | 0.92  | 1.79E-01 |
| OR8H3      | 2.19 | 1.42E-02 | 2.30  | 1.08E-02 | -0.19 | 5.73E-01 |
| FSHR       | 2.19 | 1.42E-02 | 0.23  | 4.08E-01 | 1.52  | 6.40E-02 |
| INO80D     | 2.19 | 1.44E-02 | 0.44  | 3.28E-01 | 1.63  | 5.17E-02 |
| POU4F2     | 2.19 | 1.44E-02 | 0.71  | 2.39E-01 | 1.44  | 7.47E-02 |
| RNF139     | 2.19 | 1.44E-02 | 1.78  | 3.75E-02 | -0.19 | 5.75E-01 |
| ASB14      | 2.19 | 1.44E-02 | -0.12 | 5.48E-01 | 2.56  | 5.23E-03 |
| FYTTD1     | 2.18 | 1.45E-02 | 2.36  | 9.07E-03 | 0.35  | 3.63E-01 |
| OVCA2      | 2.18 | 1.45E-02 | 0.88  | 1.89E-01 | 2.02  | 2.17E-02 |
| GPR56      | 2.18 | 1.45E-02 | 0.71  | 2.39E-01 | 1.82  | 3.40E-02 |
| HSPE1-MOB4 | 2.18 | 1.45E-02 | 1.38  | 8.41E-02 | 1.32  | 9.27E-02 |
| C11orf96   | 2.18 | 1.46E-02 | 1.96  | 2.48E-02 | 0.51  | 3.03E-01 |

|          |      |          |       |          |       |          |
|----------|------|----------|-------|----------|-------|----------|
| PA2G4    | 2.18 | 1.46E-02 | 0.48  | 3.17E-01 | 1.67  | 4.75E-02 |
| PLEKHA7  | 2.18 | 1.47E-02 | 0.06  | 4.76E-01 | 2.07  | 1.93E-02 |
| ISOC2    | 2.18 | 1.48E-02 | 0.10  | 4.59E-01 | 1.96  | 2.51E-02 |
| LAIR2    | 2.18 | 1.48E-02 | 1.42  | 7.74E-02 | 1.22  | 1.11E-01 |
| HS3ST4   | 2.18 | 1.48E-02 | 2.79  | 2.64E-03 | 1.15  | 1.25E-01 |
| NCKIPSD  | 2.17 | 1.48E-02 | 0.38  | 3.51E-01 | 2.79  | 2.61E-03 |
| ACO1     | 2.17 | 1.49E-02 | 0.42  | 3.39E-01 | 0.99  | 1.61E-01 |
| SECISBP2 | 2.17 | 1.49E-02 | 1.35  | 8.78E-02 | 0.64  | 2.62E-01 |
| PPP3R2   | 2.17 | 1.51E-02 | 0.98  | 1.63E-01 | 1.50  | 6.65E-02 |
| MED1     | 2.17 | 1.51E-02 | 2.32  | 1.03E-02 | 0.08  | 4.68E-01 |
| N4BP1    | 2.17 | 1.51E-02 | 1.37  | 8.57E-02 | 1.08  | 1.40E-01 |
| OR5I1    | 2.17 | 1.51E-02 | 2.37  | 8.97E-03 | -0.19 | 5.77E-01 |
| ACTR1A   | 2.17 | 1.52E-02 | 1.52  | 6.41E-02 | 1.05  | 1.47E-01 |
| ATXN1L   | 2.16 | 1.52E-02 | 0.72  | 2.37E-01 | 1.93  | 2.66E-02 |
| TGDS     | 2.16 | 1.53E-02 | 1.46  | 7.20E-02 | 1.48  | 7.00E-02 |
| PRSS8    | 2.16 | 1.53E-02 | 2.33  | 9.89E-03 | -0.22 | 5.89E-01 |
| PCNXL3   | 2.16 | 1.54E-02 | 2.19  | 1.43E-02 | -0.76 | 7.76E-01 |
| CCDC151  | 2.16 | 1.54E-02 | 2.16  | 1.54E-02 | 0.30  | 3.81E-01 |
| CNGA3    | 2.16 | 1.54E-02 | 2.27  | 1.16E-02 | -0.04 | 5.18E-01 |
| XRRA1    | 2.16 | 1.54E-02 | -0.53 | 7.02E-01 | 2.61  | 4.48E-03 |
| CDPF1    | 2.16 | 1.54E-02 | 0.15  | 4.39E-01 | 2.27  | 1.15E-02 |
| KAT8     | 2.16 | 1.55E-02 | 2.89  | 1.90E-03 | 0.02  | 4.91E-01 |
| RGS16    | 2.16 | 1.55E-02 | 0.08  | 4.69E-01 | 2.29  | 1.11E-02 |
| URM1     | 2.16 | 1.55E-02 | 0.89  | 1.88E-01 | 2.55  | 5.43E-03 |
| C14orf93 | 2.16 | 1.55E-02 | 0.20  | 4.21E-01 | 2.00  | 2.29E-02 |
| ZNF574   | 2.16 | 1.55E-02 | 1.52  | 6.44E-02 | 0.77  | 2.20E-01 |
| SGCZ     | 2.16 | 1.55E-02 | 2.29  | 1.09E-02 | -1.51 | 9.34E-01 |
| IZUMO2   | 2.16 | 1.55E-02 | 0.00  | 4.99E-01 | 2.12  | 1.71E-02 |
| LIPN     | 2.16 | 1.55E-02 | 0.69  | 2.45E-01 | 1.32  | 9.38E-02 |
| GALNT16  | 2.15 | 1.56E-02 | 1.28  | 9.96E-02 | 0.74  | 2.29E-01 |
| NDUFS1   | 2.15 | 1.56E-02 | 0.05  | 4.78E-01 | 2.51  | 6.09E-03 |

|         |      |          |       |          |       |          |
|---------|------|----------|-------|----------|-------|----------|
| ESRRG   | 2.15 | 1.56E-02 | -0.04 | 5.16E-01 | 1.63  | 5.18E-02 |
| LRRC18  | 2.15 | 1.57E-02 | -0.13 | 5.52E-01 | 1.81  | 3.51E-02 |
| EIF4G3  | 2.15 | 1.57E-02 | 0.90  | 1.83E-01 | 1.39  | 8.22E-02 |
| NKX2-1  | 2.15 | 1.58E-02 | 2.32  | 1.01E-02 | 0.10  | 4.60E-01 |
| EPHX3   | 2.15 | 1.58E-02 | 0.25  | 4.03E-01 | 2.20  | 1.40E-02 |
| DBH     | 2.15 | 1.60E-02 | 0.94  | 1.73E-01 | 1.40  | 8.07E-02 |
| RNF151  | 2.14 | 1.60E-02 | 2.30  | 1.08E-02 | 0.11  | 4.57E-01 |
| LSM14A  | 2.14 | 1.60E-02 | 1.46  | 7.26E-02 | 0.75  | 2.28E-01 |
| CCDC80  | 2.14 | 1.60E-02 | 1.43  | 7.68E-02 | -0.12 | 5.50E-01 |
| KIF13A  | 2.14 | 1.60E-02 | 1.20  | 1.14E-01 | 0.84  | 2.00E-01 |
| LRCH3   | 2.14 | 1.61E-02 | 2.30  | 1.07E-02 | 0.66  | 2.54E-01 |
| COX7B2  | 2.14 | 1.61E-02 | 0.64  | 2.60E-01 | 1.44  | 7.47E-02 |
| RHOT2   | 2.14 | 1.62E-02 | 0.79  | 2.13E-01 | 1.33  | 9.10E-02 |
| CDKL3   | 2.14 | 1.62E-02 | 0.38  | 3.50E-01 | 2.26  | 1.19E-02 |
| ZKSCAN3 | 2.14 | 1.63E-02 | 1.05  | 1.47E-01 | 2.42  | 7.87E-03 |
| UBAP2   | 2.14 | 1.63E-02 | 1.61  | 5.42E-02 | 0.27  | 3.95E-01 |
| INSL6   | 2.14 | 1.63E-02 | 1.97  | 2.43E-02 | 0.69  | 2.44E-01 |
| TNP1    | 2.14 | 1.63E-02 | 1.82  | 3.43E-02 | 0.83  | 2.02E-01 |
| SMUG1   | 2.14 | 1.63E-02 | 0.89  | 1.87E-01 | 1.51  | 6.59E-02 |
| POU2F3  | 2.14 | 1.64E-02 | 1.63  | 5.19E-02 | 0.69  | 2.44E-01 |
| GPR180  | 2.13 | 1.65E-02 | 2.13  | 1.64E-02 | 0.04  | 4.83E-01 |
| NEK4    | 2.13 | 1.65E-02 | 1.84  | 3.30E-02 | 0.39  | 3.47E-01 |
| UBE2B   | 2.13 | 1.66E-02 | 0.38  | 3.53E-01 | 1.96  | 2.52E-02 |
| SYTL1   | 2.13 | 1.67E-02 | 1.89  | 2.93E-02 | -0.11 | 5.43E-01 |
| CCDC53  | 2.12 | 1.69E-02 | 1.45  | 7.33E-02 | 0.94  | 1.74E-01 |
| CHID1   | 2.12 | 1.69E-02 | 1.86  | 3.11E-02 | 0.57  | 2.85E-01 |
| SMOC2   | 2.12 | 1.69E-02 | 1.75  | 3.97E-02 | 0.30  | 3.84E-01 |
| EDEM2   | 2.12 | 1.69E-02 | 1.56  | 5.94E-02 | 0.54  | 2.93E-01 |
| ARNT2   | 2.12 | 1.69E-02 | 2.70  | 3.50E-03 | -0.32 | 6.27E-01 |
| RAB27B  | 2.12 | 1.70E-02 | 1.87  | 3.10E-02 | 0.56  | 2.87E-01 |
| HSBP1   | 2.12 | 1.70E-02 | 0.30  | 3.82E-01 | 1.83  | 3.38E-02 |

|          |      |          |       |          |       |          |
|----------|------|----------|-------|----------|-------|----------|
| WAPAL    | 2.12 | 1.70E-02 | 1.54  | 6.16E-02 | 0.88  | 1.88E-01 |
| ZNF292   | 2.12 | 1.71E-02 | 0.95  | 1.70E-01 | 1.36  | 8.70E-02 |
| ACADS    | 2.12 | 1.71E-02 | 1.57  | 5.84E-02 | 0.07  | 4.72E-01 |
| FGF7     | 2.11 | 1.73E-02 | -0.15 | 5.58E-01 | 2.62  | 4.37E-03 |
| TRIM66   | 2.11 | 1.73E-02 | 1.75  | 3.98E-02 | -0.50 | 6.93E-01 |
| BRD7     | 2.11 | 1.74E-02 | 2.12  | 1.72E-02 | 0.12  | 4.53E-01 |
| RNF144A  | 2.11 | 1.74E-02 | 0.50  | 3.10E-01 | 1.56  | 5.97E-02 |
| CD164    | 2.11 | 1.74E-02 | 0.17  | 4.32E-01 | 2.36  | 9.05E-03 |
| IGFL4    | 2.11 | 1.75E-02 | 1.62  | 5.26E-02 | 0.06  | 4.77E-01 |
| ZNF821   | 2.11 | 1.75E-02 | 0.82  | 2.05E-01 | 1.76  | 3.89E-02 |
| SRP14    | 2.11 | 1.75E-02 | 1.42  | 7.85E-02 | 0.18  | 4.28E-01 |
| ZNF652   | 2.11 | 1.75E-02 | -0.07 | 5.28E-01 | 2.23  | 1.29E-02 |
| MYO1C    | 2.11 | 1.75E-02 | 1.54  | 6.14E-02 | 1.02  | 1.55E-01 |
| TDG      | 2.11 | 1.75E-02 | 0.18  | 4.30E-01 | 1.81  | 3.55E-02 |
| CDK5     | 2.11 | 1.76E-02 | 1.67  | 4.76E-02 | 0.75  | 2.26E-01 |
| RTN2     | 2.11 | 1.76E-02 | 1.14  | 1.28E-01 | 1.75  | 4.05E-02 |
| SLC35B1  | 2.11 | 1.76E-02 | 1.85  | 3.18E-02 | 0.23  | 4.09E-01 |
| TAF4B    | 2.11 | 1.76E-02 | 2.17  | 1.50E-02 | 1.15  | 1.26E-01 |
| GK2      | 2.10 | 1.77E-02 | 1.14  | 1.26E-01 | 1.29  | 9.77E-02 |
| IGF1     | 2.10 | 1.77E-02 | 1.58  | 5.75E-02 | 0.28  | 3.88E-01 |
| TMEM200B | 2.10 | 1.78E-02 | 1.24  | 1.07E-01 | 0.78  | 2.17E-01 |
| RSPO4    | 2.10 | 1.78E-02 | 0.17  | 4.33E-01 | 1.84  | 3.31E-02 |
| SPOPL    | 2.10 | 1.78E-02 | 1.37  | 8.53E-02 | 0.76  | 2.25E-01 |
| ERBB3    | 2.10 | 1.79E-02 | 2.24  | 1.27E-02 | 1.34  | 9.00E-02 |
| SLC17A6  | 2.10 | 1.79E-02 | -0.07 | 5.28E-01 | 1.94  | 2.65E-02 |
| CACNB4   | 2.10 | 1.80E-02 | -0.20 | 5.81E-01 | 2.23  | 1.28E-02 |
| DYRK1A   | 2.10 | 1.81E-02 | 1.88  | 3.04E-02 | 0.23  | 4.08E-01 |
| ACAN     | 2.09 | 1.81E-02 | 0.37  | 3.55E-01 | 2.22  | 1.32E-02 |
| TPST1    | 2.09 | 1.81E-02 | 2.31  | 1.05E-02 | -0.10 | 5.41E-01 |
| CD248    | 2.09 | 1.82E-02 | 2.23  | 1.28E-02 | 0.96  | 1.69E-01 |
| FBXW8    | 2.09 | 1.82E-02 | 2.60  | 4.73E-03 | -1.03 | 8.48E-01 |

|          |      |          |       |          |       |          |
|----------|------|----------|-------|----------|-------|----------|
| SCRN3    | 2.09 | 1.83E-02 | 1.50  | 6.63E-02 | 0.61  | 2.69E-01 |
| LDHD     | 2.09 | 1.83E-02 | 1.42  | 7.77E-02 | 1.06  | 1.45E-01 |
| IQCG     | 2.09 | 1.83E-02 | 1.35  | 8.82E-02 | 1.10  | 1.35E-01 |
| CELSR3   | 2.09 | 1.83E-02 | 0.05  | 4.81E-01 | 2.83  | 2.32E-03 |
| TRMT13   | 2.09 | 1.83E-02 | 1.91  | 2.80E-02 | -0.37 | 6.43E-01 |
| C1orf167 | 2.09 | 1.84E-02 | -1.18 | 8.81E-01 | 2.71  | 3.36E-03 |
| LAYN     | 2.09 | 1.84E-02 | 2.56  | 5.30E-03 | 1.03  | 1.52E-01 |
| PCBP2    | 2.09 | 1.84E-02 | 2.45  | 7.14E-03 | 0.03  | 4.89E-01 |
| TSLP     | 2.09 | 1.84E-02 | 0.88  | 1.89E-01 | 1.95  | 2.54E-02 |
| PDCD6IP  | 2.09 | 1.84E-02 | 1.25  | 1.06E-01 | 1.70  | 4.44E-02 |
| ZNF547   | 2.09 | 1.85E-02 | 1.31  | 9.54E-02 | 0.95  | 1.70E-01 |
| PDLIM2   | 2.09 | 1.85E-02 | 0.88  | 1.89E-01 | 1.66  | 4.80E-02 |
| SASS6    | 2.09 | 1.85E-02 | 1.85  | 3.25E-02 | -0.33 | 6.29E-01 |
| LRSAM1   | 2.08 | 1.86E-02 | -0.02 | 5.08E-01 | 1.63  | 5.12E-02 |
| S100PBP  | 2.08 | 1.87E-02 | 0.69  | 2.45E-01 | 1.78  | 3.75E-02 |
| NEGR1    | 2.08 | 1.87E-02 | -0.33 | 6.28E-01 | 3.14  | 8.57E-04 |
| KCNK7    | 2.08 | 1.87E-02 | 1.69  | 4.56E-02 | 0.49  | 3.11E-01 |
| ZNF608   | 2.08 | 1.88E-02 | 1.91  | 2.81E-02 | -0.28 | 6.09E-01 |
| LMOD2    | 2.08 | 1.89E-02 | 2.47  | 6.70E-03 | 0.36  | 3.60E-01 |
| ZNF621   | 2.08 | 1.89E-02 | 2.46  | 7.00E-03 | -0.12 | 5.47E-01 |
| RPS18    | 2.08 | 1.89E-02 | 0.92  | 1.79E-01 | 1.99  | 2.34E-02 |
| RNH1     | 2.08 | 1.89E-02 | 0.21  | 4.16E-01 | 3.52  | 2.15E-04 |
| MARK3    | 2.08 | 1.90E-02 | 0.57  | 2.83E-01 | 1.62  | 5.22E-02 |
| PRUNE    | 2.07 | 1.90E-02 | 1.23  | 1.09E-01 | 0.22  | 4.14E-01 |
| VPS52    | 2.07 | 1.91E-02 | 0.50  | 3.08E-01 | 2.07  | 1.91E-02 |
| PRPF4B   | 2.07 | 1.91E-02 | 1.37  | 8.59E-02 | 0.87  | 1.91E-01 |
| HAPLN2   | 2.07 | 1.91E-02 | -0.02 | 5.09E-01 | 2.46  | 6.98E-03 |
| TMEM51   | 2.07 | 1.91E-02 | 0.19  | 4.26E-01 | 2.36  | 9.11E-03 |
| LSM4     | 2.07 | 1.92E-02 | 0.10  | 4.61E-01 | 2.15  | 1.58E-02 |
| TRIM27   | 2.07 | 1.92E-02 | 1.50  | 6.70E-02 | 0.98  | 1.64E-01 |
| C16orf96 | 2.07 | 1.92E-02 | 2.19  | 1.42E-02 | -0.10 | 5.42E-01 |

|          |      |          |       |          |       |          |
|----------|------|----------|-------|----------|-------|----------|
| HBG2     | 2.07 | 1.92E-02 | 1.52  | 6.46E-02 | 0.38  | 3.52E-01 |
| TRAM1    | 2.07 | 1.92E-02 | 2.66  | 3.91E-03 | 0.17  | 4.34E-01 |
| SPATA17  | 2.07 | 1.93E-02 | 0.33  | 3.72E-01 | 1.47  | 7.02E-02 |
| FBLN5    | 2.07 | 1.93E-02 | 2.22  | 1.33E-02 | 0.38  | 3.51E-01 |
| SLC35F4  | 2.07 | 1.93E-02 | 1.28  | 1.00E-01 | 2.27  | 1.16E-02 |
| ASCL4    | 2.07 | 1.94E-02 | 1.94  | 2.63E-02 | 0.97  | 1.66E-01 |
| SF3B1    | 2.07 | 1.94E-02 | 1.40  | 8.06E-02 | 1.15  | 1.26E-01 |
| ZNF311   | 2.07 | 1.94E-02 | 2.24  | 1.25E-02 | 0.79  | 2.14E-01 |
| SPTBN5   | 2.06 | 1.95E-02 | 0.74  | 2.31E-01 | 0.55  | 2.91E-01 |
| SLC6A2   | 2.06 | 1.95E-02 | 1.14  | 1.27E-01 | 0.92  | 1.79E-01 |
| POGLUT1  | 2.06 | 1.95E-02 | 2.12  | 1.71E-02 | 0.40  | 3.45E-01 |
| CYTL1    | 2.06 | 1.96E-02 | 0.54  | 2.94E-01 | 2.17  | 1.50E-02 |
| ZSCAN1   | 2.06 | 1.96E-02 | 1.01  | 1.57E-01 | 1.59  | 5.62E-02 |
| QARS     | 2.06 | 1.96E-02 | 0.09  | 4.64E-01 | 3.30  | 4.75E-04 |
| SRC      | 2.06 | 1.96E-02 | -0.26 | 6.02E-01 | 2.04  | 2.09E-02 |
| AFAP1    | 2.06 | 1.96E-02 | 2.30  | 1.08E-02 | 1.62  | 5.23E-02 |
| MTMR3    | 2.06 | 1.96E-02 | -0.26 | 6.04E-01 | 2.29  | 1.10E-02 |
| QKI      | 2.06 | 1.96E-02 | 2.28  | 1.12E-02 | 0.30  | 3.81E-01 |
| PCSK7    | 2.06 | 1.97E-02 | -0.12 | 5.46E-01 | 2.01  | 2.22E-02 |
| HIST1H4H | 2.06 | 1.98E-02 | 1.41  | 7.87E-02 | 0.67  | 2.53E-01 |
| PPM1N    | 2.06 | 1.98E-02 | 0.81  | 2.08E-01 | 1.95  | 2.53E-02 |
| CCDC180  | 2.06 | 1.98E-02 | 0.00  | 4.99E-01 | 1.52  | 6.48E-02 |
| MSMO1    | 2.06 | 1.99E-02 | 0.05  | 4.81E-01 | 2.62  | 4.34E-03 |
| OR5T1    | 2.05 | 2.00E-02 | 1.91  | 2.81E-02 | 0.38  | 3.53E-01 |
| PARK7    | 2.05 | 2.01E-02 | 1.79  | 3.70E-02 | 0.69  | 2.45E-01 |
| FAM114A1 | 2.05 | 2.01E-02 | 1.09  | 1.37E-01 | 1.62  | 5.21E-02 |
| CHRN2    | 2.05 | 2.01E-02 | 0.01  | 4.96E-01 | 2.74  | 3.03E-03 |
| KRTAP1-5 | 2.05 | 2.01E-02 | 1.26  | 1.03E-01 | 0.77  | 2.20E-01 |
| THSD7A   | 2.05 | 2.02E-02 | 0.68  | 2.49E-01 | 1.32  | 9.37E-02 |
| CNGB1    | 2.05 | 2.02E-02 | 1.23  | 1.09E-01 | 1.07  | 1.43E-01 |
| TUSC5    | 2.05 | 2.03E-02 | 2.68  | 3.68E-03 | -0.32 | 6.24E-01 |

|          |      |          |       |          |       |          |
|----------|------|----------|-------|----------|-------|----------|
| ZNF675   | 2.05 | 2.03E-02 | 3.26  | 5.62E-04 | -1.38 | 9.17E-01 |
| TMTC4    | 2.05 | 2.03E-02 | 2.42  | 7.79E-03 | 1.00  | 1.59E-01 |
| HDAC4    | 2.05 | 2.03E-02 | 0.28  | 3.91E-01 | 3.32  | 4.50E-04 |
| SPO11    | 2.05 | 2.04E-02 | 0.05  | 4.78E-01 | 2.56  | 5.29E-03 |
| TMEM132E | 2.05 | 2.04E-02 | -0.72 | 7.63E-01 | 3.42  | 3.17E-04 |
| MLLT11   | 2.04 | 2.05E-02 | 1.83  | 3.40E-02 | -0.04 | 5.17E-01 |
| ZNF717   | 2.04 | 2.05E-02 | 2.04  | 2.06E-02 | 0.45  | 3.27E-01 |
| FAM221A  | 2.04 | 2.05E-02 | 1.13  | 1.28E-01 | 0.44  | 3.31E-01 |
| GYPC     | 2.04 | 2.05E-02 | 1.69  | 4.54E-02 | 0.67  | 2.51E-01 |
| PPP5D1   | 2.04 | 2.05E-02 | 1.84  | 3.28E-02 | -0.16 | 5.62E-01 |
| TRMT5    | 2.04 | 2.06E-02 | 1.42  | 7.77E-02 | 0.56  | 2.89E-01 |
| DMBT1    | 2.04 | 2.06E-02 | 1.29  | 9.86E-02 | 0.91  | 1.82E-01 |
| CLASRP   | 2.04 | 2.06E-02 | 0.29  | 3.85E-01 | 2.00  | 2.25E-02 |
| CASKIN2  | 2.04 | 2.06E-02 | 2.23  | 1.28E-02 | -0.45 | 6.73E-01 |
| LRP1B    | 2.04 | 2.06E-02 | 1.23  | 1.10E-01 | 1.02  | 1.53E-01 |
| C11orf68 | 2.04 | 2.06E-02 | 1.08  | 1.40E-01 | 1.63  | 5.17E-02 |
| DGCR8    | 2.04 | 2.07E-02 | 0.74  | 2.30E-01 | 2.03  | 2.12E-02 |
| ENO4     | 2.04 | 2.07E-02 | 0.33  | 3.72E-01 | 2.20  | 1.38E-02 |
| SMPD1    | 2.04 | 2.07E-02 | 1.29  | 9.77E-02 | 1.05  | 1.48E-01 |
| FBXO5    | 2.04 | 2.07E-02 | 2.16  | 1.55E-02 | 0.66  | 2.55E-01 |
| VWA5B1   | 2.04 | 2.08E-02 | 0.10  | 4.61E-01 | 2.05  | 2.02E-02 |
| GPC6     | 2.04 | 2.08E-02 | 1.25  | 1.05E-01 | 0.71  | 2.40E-01 |
| PRKAR1B  | 2.04 | 2.08E-02 | 1.71  | 4.33E-02 | 0.56  | 2.87E-01 |
| SIRT4    | 2.04 | 2.08E-02 | 1.28  | 1.01E-01 | 0.94  | 1.72E-01 |
| DGKI     | 2.04 | 2.09E-02 | 0.34  | 3.66E-01 | 1.40  | 8.06E-02 |
| TIAL1    | 2.04 | 2.09E-02 | 0.27  | 3.92E-01 | 1.79  | 3.68E-02 |
| OSGIN2   | 2.03 | 2.12E-02 | 1.61  | 5.41E-02 | 0.95  | 1.71E-01 |
| GIGYF2   | 2.03 | 2.12E-02 | 0.87  | 1.92E-01 | 1.89  | 2.91E-02 |
| OR51B2   | 2.03 | 2.12E-02 | 1.80  | 3.56E-02 | 0.21  | 4.15E-01 |
| OR11G2   | 2.03 | 2.12E-02 | 2.41  | 7.97E-03 | -0.59 | 7.23E-01 |
| MRPS18C  | 2.03 | 2.13E-02 | 0.81  | 2.08E-01 | 1.39  | 8.23E-02 |

|          |      |          |       |          |       |          |
|----------|------|----------|-------|----------|-------|----------|
| PRKCA    | 2.03 | 2.14E-02 | 0.83  | 2.05E-01 | 0.77  | 2.21E-01 |
| DPYD     | 2.03 | 2.14E-02 | 0.53  | 2.98E-01 | 0.79  | 2.16E-01 |
| C12orf40 | 2.02 | 2.16E-02 | 2.58  | 4.99E-03 | -0.67 | 7.48E-01 |
| PP13439  | 2.02 | 2.18E-02 | 1.83  | 3.36E-02 | 1.85  | 3.22E-02 |
| DCAF5    | 2.02 | 2.18E-02 | 1.32  | 9.29E-02 | 0.28  | 3.88E-01 |
| SMIM8    | 2.02 | 2.18E-02 | 0.74  | 2.31E-01 | 1.90  | 2.86E-02 |
| PLA2G1B  | 2.02 | 2.18E-02 | 1.18  | 1.20E-01 | 0.86  | 1.95E-01 |
| NPPA     | 2.02 | 2.18E-02 | 0.25  | 4.03E-01 | 2.86  | 2.12E-03 |
| PTPRD    | 2.02 | 2.19E-02 | 2.01  | 2.24E-02 | 0.67  | 2.50E-01 |
| DCK      | 2.02 | 2.19E-02 | 1.30  | 9.71E-02 | 0.99  | 1.61E-01 |
| AZIN1    | 2.01 | 2.21E-02 | 1.33  | 9.14E-02 | 1.40  | 8.14E-02 |
| C1QTNF9  | 2.01 | 2.21E-02 | 0.99  | 1.60E-01 | 1.11  | 1.34E-01 |
| SEMA4B   | 2.01 | 2.23E-02 | 1.76  | 3.94E-02 | -0.11 | 5.44E-01 |
| NUP93    | 2.01 | 2.23E-02 | 2.24  | 1.25E-02 | -0.30 | 6.16E-01 |
| EEF2K    | 2.01 | 2.23E-02 | 1.89  | 2.96E-02 | 0.42  | 3.37E-01 |
| RGS18    | 2.01 | 2.23E-02 | 1.72  | 4.27E-02 | 0.83  | 2.04E-01 |
| ACP2     | 2.01 | 2.24E-02 | 0.60  | 2.76E-01 | 1.65  | 4.96E-02 |
| SPEF1    | 2.00 | 2.25E-02 | 2.45  | 7.18E-03 | -0.60 | 7.26E-01 |
| BTN1A1   | 2.00 | 2.25E-02 | 2.11  | 1.74E-02 | 0.34  | 3.67E-01 |
| LAT      | 2.00 | 2.26E-02 | -0.43 | 6.68E-01 | 3.05  | 1.14E-03 |
| TTC26    | 2.00 | 2.26E-02 | 1.12  | 1.31E-01 | 1.12  | 1.31E-01 |
| RBM45    | 2.00 | 2.26E-02 | 0.53  | 2.99E-01 | 1.87  | 3.04E-02 |
| ZPLD1    | 2.00 | 2.27E-02 | 1.25  | 1.06E-01 | 1.30  | 9.60E-02 |
| LRTM2    | 2.00 | 2.28E-02 | 0.52  | 3.03E-01 | 1.87  | 3.10E-02 |
| TSPAN4   | 2.00 | 2.28E-02 | 1.08  | 1.40E-01 | 0.77  | 2.21E-01 |
| GJC1     | 2.00 | 2.29E-02 | 2.23  | 1.30E-02 | -0.16 | 5.63E-01 |
| BBX      | 2.00 | 2.30E-02 | 0.95  | 1.71E-01 | 0.95  | 1.70E-01 |
| ITGAM    | 1.99 | 2.30E-02 | 0.33  | 3.72E-01 | 1.65  | 4.94E-02 |
| LYPD3    | 1.99 | 2.31E-02 | 0.26  | 3.99E-01 | 1.76  | 3.91E-02 |
| FIBCD1   | 1.99 | 2.31E-02 | 0.46  | 3.23E-01 | 1.00  | 1.58E-01 |
| TRIM32   | 1.99 | 2.31E-02 | 1.63  | 5.14E-02 | 1.12  | 1.31E-01 |



|              |      |          |       |          |       |          |
|--------------|------|----------|-------|----------|-------|----------|
| MED30        | 1.99 | 2.31E-02 | 2.50  | 6.17E-03 | -0.81 | 7.92E-01 |
| PLA2G10      | 1.99 | 2.32E-02 | 0.36  | 3.60E-01 | 2.01  | 2.24E-02 |
| TMPPRSS5     | 1.99 | 2.32E-02 | -0.49 | 6.89E-01 | 1.97  | 2.43E-02 |
| VWC2L        | 1.99 | 2.32E-02 | 2.03  | 2.10E-02 | -0.23 | 5.92E-01 |
| CCNA1        | 1.99 | 2.33E-02 | 2.76  | 2.87E-03 | -0.40 | 6.54E-01 |
| SMIM4        | 1.99 | 2.33E-02 | 1.67  | 4.75E-02 | 0.50  | 3.07E-01 |
| DHX36        | 1.99 | 2.33E-02 | 2.00  | 2.30E-02 | -0.29 | 6.15E-01 |
| GPX6         | 1.99 | 2.33E-02 | 0.26  | 3.99E-01 | 2.06  | 1.96E-02 |
| NUPL2        | 1.99 | 2.34E-02 | 1.42  | 7.79E-02 | 0.94  | 1.73E-01 |
| HTR1F        | 1.99 | 2.34E-02 | 0.78  | 2.17E-01 | 1.57  | 5.82E-02 |
| CTD-2203A3.1 | 1.99 | 2.34E-02 | 2.16  | 1.52E-02 | 0.09  | 4.63E-01 |
| IST1         | 1.99 | 2.34E-02 | 0.58  | 2.82E-01 | 1.66  | 4.84E-02 |
| UBQLN4       | 1.99 | 2.34E-02 | 1.16  | 1.22E-01 | 1.26  | 1.03E-01 |
| ANXA4        | 1.99 | 2.35E-02 | 2.69  | 3.55E-03 | -0.61 | 7.28E-01 |
| UQCR10       | 1.99 | 2.35E-02 | 0.03  | 4.89E-01 | 1.80  | 3.58E-02 |
| TMEM14E      | 1.99 | 2.36E-02 | 0.95  | 1.72E-01 | 1.56  | 5.98E-02 |
| ANGPT2       | 1.98 | 2.36E-02 | 1.27  | 1.03E-01 | 1.02  | 1.54E-01 |
| PROCR        | 1.98 | 2.36E-02 | 2.01  | 2.23E-02 | 0.16  | 4.35E-01 |
| TRAF4        | 1.98 | 2.36E-02 | 1.00  | 1.59E-01 | 1.44  | 7.44E-02 |
| CHST3        | 1.98 | 2.36E-02 | 0.16  | 4.38E-01 | 2.00  | 2.29E-02 |
| TOLLIP       | 1.98 | 2.36E-02 | 0.47  | 3.20E-01 | 1.58  | 5.71E-02 |
| GPAM         | 1.98 | 2.37E-02 | 2.46  | 7.04E-03 | 0.63  | 2.63E-01 |
| C15orf26     | 1.98 | 2.37E-02 | 1.75  | 4.03E-02 | -0.21 | 5.85E-01 |
| AFAP1L2      | 1.98 | 2.37E-02 | 2.85  | 2.18E-03 | -0.37 | 6.43E-01 |
| SETDB1       | 1.98 | 2.37E-02 | -0.59 | 7.21E-01 | 2.58  | 4.94E-03 |
| CDCA7        | 1.98 | 2.38E-02 | 1.31  | 9.50E-02 | 1.77  | 3.80E-02 |
| CD3D         | 1.98 | 2.38E-02 | 1.50  | 6.63E-02 | 1.07  | 1.42E-01 |
| CREB3L1      | 1.98 | 2.38E-02 | 1.45  | 7.40E-02 | 1.90  | 2.87E-02 |
| DEPDC1B      | 1.98 | 2.38E-02 | 0.48  | 3.16E-01 | 2.45  | 7.18E-03 |
| SYDE2        | 1.98 | 2.39E-02 | 0.69  | 2.46E-01 | 1.27  | 1.03E-01 |
| PARN         | 1.98 | 2.39E-02 | 0.46  | 3.22E-01 | 1.83  | 3.36E-02 |

|           |      |          |       |          |       |          |
|-----------|------|----------|-------|----------|-------|----------|
| C5orf42   | 1.98 | 2.39E-02 | 0.86  | 1.96E-01 | 1.73  | 4.22E-02 |
| OMA1      | 1.98 | 2.39E-02 | 0.63  | 2.66E-01 | 1.10  | 1.35E-01 |
| BCKDK     | 1.98 | 2.40E-02 | 2.56  | 5.19E-03 | 0.26  | 3.96E-01 |
| FAM200B   | 1.98 | 2.40E-02 | 1.57  | 5.79E-02 | 0.10  | 4.61E-01 |
| OR2T6     | 1.98 | 2.40E-02 | 1.67  | 4.77E-02 | 0.43  | 3.34E-01 |
| DRD4      | 1.98 | 2.40E-02 | 1.14  | 1.27E-01 | 1.49  | 6.79E-02 |
| TNFRSF21  | 1.98 | 2.40E-02 | 1.02  | 1.55E-01 | 0.33  | 3.70E-01 |
| PEF1      | 1.98 | 2.41E-02 | 1.33  | 9.23E-02 | 1.13  | 1.30E-01 |
| ZNF257    | 1.98 | 2.41E-02 | 2.98  | 1.45E-03 | -0.66 | 7.45E-01 |
| NBN       | 1.97 | 2.42E-02 | -0.25 | 5.99E-01 | 3.01  | 1.32E-03 |
| MCM3      | 1.97 | 2.42E-02 | 1.96  | 2.50E-02 | -0.05 | 5.19E-01 |
| ZNF626    | 1.97 | 2.43E-02 | 1.19  | 1.17E-01 | 0.57  | 2.84E-01 |
| FBXO30    | 1.97 | 2.43E-02 | 1.83  | 3.38E-02 | -0.02 | 5.10E-01 |
| RPL30     | 1.97 | 2.44E-02 | 3.07  | 1.07E-03 | -1.02 | 8.45E-01 |
| FEZF1     | 1.97 | 2.45E-02 | 0.53  | 2.97E-01 | 2.94  | 1.64E-03 |
| PSMB6     | 1.97 | 2.45E-02 | 2.26  | 1.20E-02 | 0.05  | 4.81E-01 |
| TMPRSS11E | 1.97 | 2.46E-02 | 0.71  | 2.39E-01 | 1.38  | 8.42E-02 |
| PXN       | 1.97 | 2.46E-02 | 0.76  | 2.23E-01 | 1.17  | 1.21E-01 |
| OR2J3     | 1.97 | 2.46E-02 | 1.79  | 3.71E-02 | 0.88  | 1.89E-01 |
| OR4C3     | 1.97 | 2.47E-02 | 1.05  | 1.47E-01 | 1.17  | 1.21E-01 |
| UNC119B   | 1.97 | 2.47E-02 | 1.11  | 1.34E-01 | 0.55  | 2.91E-01 |
| ANXA9     | 1.96 | 2.47E-02 | 0.97  | 1.65E-01 | 1.03  | 1.52E-01 |
| RNFT2     | 1.96 | 2.47E-02 | 1.27  | 1.02E-01 | 0.88  | 1.89E-01 |
| ANKRD9    | 1.96 | 2.47E-02 | 2.32  | 1.01E-02 | 0.20  | 4.23E-01 |
| IDH3B     | 1.96 | 2.48E-02 | 1.20  | 1.15E-01 | 2.25  | 1.23E-02 |
| METTL9    | 1.96 | 2.48E-02 | 2.15  | 1.58E-02 | -0.49 | 6.87E-01 |
| LIPK      | 1.96 | 2.48E-02 | 0.74  | 2.28E-01 | 1.57  | 5.79E-02 |
| CD226     | 1.96 | 2.49E-02 | 0.72  | 2.36E-01 | 2.18  | 1.45E-02 |
| CDK17     | 1.96 | 2.49E-02 | 1.60  | 5.47E-02 | 0.62  | 2.68E-01 |
| CD81      | 1.96 | 2.49E-02 | 1.83  | 3.33E-02 | 0.42  | 3.38E-01 |
| HSPBP1    | 1.96 | 2.49E-02 | 1.54  | 6.15E-02 | 0.54  | 2.93E-01 |

|         |      |          |       |          |       |          |
|---------|------|----------|-------|----------|-------|----------|
| SAT2    | 1.96 | 2.49E-02 | 2.89  | 1.92E-03 | -0.70 | 7.59E-01 |
| TCEB3B  | 1.96 | 2.50E-02 | 1.05  | 1.47E-01 | 0.74  | 2.31E-01 |
| GRIN3A  | 1.96 | 2.50E-02 | 0.80  | 2.11E-01 | 0.54  | 2.96E-01 |
| MLEC    | 1.96 | 2.50E-02 | 1.10  | 1.36E-01 | 0.36  | 3.58E-01 |
| SRF     | 1.96 | 2.50E-02 | 0.49  | 3.10E-01 | 2.13  | 1.64E-02 |
| ARL6IP5 | 1.96 | 2.52E-02 | 0.00  | 5.01E-01 | 1.74  | 4.08E-02 |
| RBP3    | 1.96 | 2.52E-02 | 1.01  | 1.57E-01 | 0.36  | 3.60E-01 |
| BOD1L2  | 1.96 | 2.52E-02 | 1.76  | 3.95E-02 | 2.17  | 1.49E-02 |
| EHD3    | 1.96 | 2.52E-02 | 2.28  | 1.12E-02 | -0.87 | 8.08E-01 |
| CTNNA2  | 1.96 | 2.52E-02 | 2.15  | 1.59E-02 | 0.19  | 4.26E-01 |
| TAS1R1  | 1.96 | 2.52E-02 | 1.53  | 6.29E-02 | 1.47  | 7.07E-02 |
| NUPR1   | 1.96 | 2.53E-02 | -0.41 | 6.60E-01 | 2.45  | 7.05E-03 |
| LAP3    | 1.96 | 2.53E-02 | 1.47  | 7.10E-02 | 0.63  | 2.65E-01 |
| NOTCH1  | 1.95 | 2.53E-02 | 1.48  | 6.91E-02 | -0.18 | 5.71E-01 |
| GRB14   | 1.95 | 2.53E-02 | 0.09  | 4.63E-01 | 1.43  | 7.68E-02 |
| APH1A   | 1.95 | 2.54E-02 | 0.95  | 1.71E-01 | 1.45  | 7.33E-02 |
| GPR15   | 1.95 | 2.55E-02 | -0.61 | 7.30E-01 | 2.71  | 3.36E-03 |
| METTL20 | 1.95 | 2.57E-02 | 1.38  | 8.40E-02 | 0.67  | 2.53E-01 |
| GPX5    | 1.95 | 2.57E-02 | -0.09 | 5.36E-01 | 2.31  | 1.06E-02 |
| HPCAL4  | 1.95 | 2.57E-02 | 1.92  | 2.75E-02 | 0.56  | 2.87E-01 |
| RBP1    | 1.95 | 2.57E-02 | 2.77  | 2.76E-03 | 1.28  | 1.01E-01 |
| DEFB113 | 1.95 | 2.58E-02 | 1.83  | 3.33E-02 | 0.46  | 3.23E-01 |
| LEAP2   | 1.95 | 2.59E-02 | 1.08  | 1.41E-01 | 0.66  | 2.56E-01 |
| CD79A   | 1.94 | 2.59E-02 | 0.50  | 3.10E-01 | 1.48  | 6.89E-02 |
| SEMA3A  | 1.94 | 2.59E-02 | -0.32 | 6.26E-01 | 1.77  | 3.83E-02 |
| OR4X1   | 1.94 | 2.60E-02 | 0.97  | 1.65E-01 | 1.26  | 1.04E-01 |
| ZNF350  | 1.94 | 2.60E-02 | 3.29  | 5.00E-04 | 0.16  | 4.37E-01 |
| SP6     | 1.94 | 2.60E-02 | 0.85  | 1.97E-01 | 1.02  | 1.54E-01 |
| GPSM1   | 1.94 | 2.61E-02 | 1.03  | 1.52E-01 | 0.41  | 3.41E-01 |
| SI      | 1.94 | 2.61E-02 | 0.62  | 2.67E-01 | 1.00  | 1.59E-01 |
| EPDR1   | 1.94 | 2.61E-02 | 0.69  | 2.44E-01 | 1.54  | 6.13E-02 |

|         |      |          |      |          |       |          |
|---------|------|----------|------|----------|-------|----------|
| LIMD1   | 1.94 | 2.62E-02 | 0.48 | 3.15E-01 | 0.98  | 1.65E-01 |
| PDCD1   | 1.94 | 2.62E-02 | 0.09 | 4.65E-01 | 2.14  | 1.62E-02 |
| SPICE1  | 1.94 | 2.62E-02 | 2.05 | 2.03E-02 | -0.96 | 8.31E-01 |
| OR5M10  | 1.94 | 2.62E-02 | 1.74 | 4.08E-02 | 0.42  | 3.37E-01 |
| BAZ1A   | 1.94 | 2.63E-02 | 1.23 | 1.09E-01 | 0.74  | 2.29E-01 |
| CD68    | 1.94 | 2.63E-02 | 1.36 | 8.62E-02 | 0.40  | 3.46E-01 |
| JMJD8   | 1.94 | 2.63E-02 | 1.19 | 1.17E-01 | 1.26  | 1.03E-01 |
| UBN2    | 1.94 | 2.63E-02 | 1.78 | 3.77E-02 | -0.29 | 6.15E-01 |
| SURF1   | 1.94 | 2.64E-02 | 0.68 | 2.49E-01 | 1.25  | 1.05E-01 |
| EHF     | 1.94 | 2.64E-02 | 1.14 | 1.27E-01 | 0.84  | 2.01E-01 |
| FOSL1   | 1.94 | 2.65E-02 | 2.00 | 2.28E-02 | -0.36 | 6.42E-01 |
| EEF1B2  | 1.93 | 2.68E-02 | 0.19 | 4.23E-01 | 2.23  | 1.29E-02 |
| GHRHR   | 1.93 | 2.69E-02 | 0.25 | 4.00E-01 | 2.14  | 1.62E-02 |
| RHOT1   | 1.93 | 2.69E-02 | 2.30 | 1.08E-02 | -0.12 | 5.47E-01 |
| HIGD1A  | 1.93 | 2.70E-02 | 1.24 | 1.08E-01 | 1.46  | 7.22E-02 |
| PPIL6   | 1.93 | 2.70E-02 | 0.08 | 4.69E-01 | 2.38  | 8.54E-03 |
| RPS2    | 1.93 | 2.70E-02 | 1.52 | 6.46E-02 | 0.61  | 2.72E-01 |
| APOBEC2 | 1.93 | 2.71E-02 | 0.56 | 2.87E-01 | 1.80  | 3.56E-02 |
| MAST1   | 1.92 | 2.71E-02 | 1.07 | 1.41E-01 | 1.12  | 1.31E-01 |
| DHRS2   | 1.92 | 2.72E-02 | 1.96 | 2.50E-02 | -0.04 | 5.15E-01 |
| LYRM9   | 1.92 | 2.72E-02 | 0.74 | 2.30E-01 | 1.64  | 5.10E-02 |
| CXCR1   | 1.92 | 2.72E-02 | 1.91 | 2.81E-02 | 0.19  | 4.24E-01 |
| NOP56   | 1.92 | 2.73E-02 | 1.93 | 2.69E-02 | 1.85  | 3.19E-02 |
| ACLY    | 1.92 | 2.73E-02 | 1.47 | 7.13E-02 | 0.67  | 2.52E-01 |
| RPS6KA5 | 1.92 | 2.73E-02 | 1.14 | 1.26E-01 | 1.72  | 4.27E-02 |
| ZFP69   | 1.92 | 2.73E-02 | 1.25 | 1.06E-01 | 1.29  | 9.77E-02 |
| ANXA13  | 1.92 | 2.73E-02 | 0.35 | 3.62E-01 | 1.59  | 5.62E-02 |
| SDR42E2 | 1.92 | 2.74E-02 | 1.95 | 2.55E-02 | 0.57  | 2.86E-01 |
| CYP11B1 | 1.92 | 2.74E-02 | 1.59 | 5.63E-02 | 0.53  | 2.99E-01 |
| TREM1   | 1.92 | 2.74E-02 | 1.68 | 4.64E-02 | 0.71  | 2.38E-01 |
| TIFA    | 1.92 | 2.74E-02 | 0.64 | 2.62E-01 | 1.88  | 2.99E-02 |

|            |      |          |       |          |       |          |
|------------|------|----------|-------|----------|-------|----------|
| C3orf33    | 1.92 | 2.75E-02 | 0.09  | 4.65E-01 | 1.32  | 9.29E-02 |
| QPCTL      | 1.92 | 2.75E-02 | 0.00  | 4.99E-01 | 1.57  | 5.88E-02 |
| PRKAR2A    | 1.92 | 2.75E-02 | -0.15 | 5.59E-01 | 2.59  | 4.75E-03 |
| ARNT       | 1.92 | 2.76E-02 | -0.65 | 7.41E-01 | 2.21  | 1.34E-02 |
| LARP1B     | 1.92 | 2.77E-02 | 2.84  | 2.29E-03 | -0.69 | 7.56E-01 |
| KIF20B     | 1.91 | 2.78E-02 | 0.77  | 2.21E-01 | 1.48  | 6.97E-02 |
| PIFO       | 1.91 | 2.78E-02 | 1.42  | 7.82E-02 | 0.86  | 1.96E-01 |
| COG5       | 1.91 | 2.78E-02 | 1.66  | 4.86E-02 | 1.65  | 4.93E-02 |
| AF165138.7 | 1.91 | 2.79E-02 | 1.45  | 7.41E-02 | 0.45  | 3.25E-01 |
| SHC3       | 1.91 | 2.80E-02 | 1.46  | 7.28E-02 | 0.75  | 2.27E-01 |
| OR4D2      | 1.91 | 2.80E-02 | 1.04  | 1.49E-01 | 1.25  | 1.06E-01 |
| CDKN2B     | 1.91 | 2.80E-02 | 2.01  | 2.20E-02 | -0.35 | 6.38E-01 |
| GCC1       | 1.91 | 2.81E-02 | 1.64  | 5.04E-02 | 1.11  | 1.33E-01 |
| RAE1       | 1.91 | 2.81E-02 | -0.10 | 5.38E-01 | 2.46  | 7.03E-03 |
| OARD1      | 1.91 | 2.82E-02 | 0.45  | 3.25E-01 | 1.83  | 3.39E-02 |
| EYS        | 1.91 | 2.82E-02 | -1.50 | 9.33E-01 | 3.58  | 1.71E-04 |
| EVL        | 1.91 | 2.84E-02 | 2.87  | 2.06E-03 | -1.82 | 9.66E-01 |
| PDIA6      | 1.91 | 2.84E-02 | 0.98  | 1.63E-01 | 1.78  | 3.78E-02 |
| ALDH5A1    | 1.91 | 2.84E-02 | 1.43  | 7.70E-02 | 1.20  | 1.15E-01 |
| OR51E1     | 1.90 | 2.86E-02 | 0.45  | 3.27E-01 | 1.85  | 3.25E-02 |
| AMBRA1     | 1.90 | 2.86E-02 | 0.20  | 4.22E-01 | 1.92  | 2.77E-02 |
| GLT8D1     | 1.90 | 2.86E-02 | 1.45  | 7.33E-02 | 0.31  | 3.79E-01 |
| SLITRK5    | 1.90 | 2.87E-02 | 2.34  | 9.77E-03 | -0.72 | 7.65E-01 |
| C14orf183  | 1.90 | 2.87E-02 | 1.44  | 7.53E-02 | 0.53  | 2.98E-01 |
| CCDC6      | 1.90 | 2.87E-02 | 0.91  | 1.81E-01 | 1.51  | 6.60E-02 |
| OR8H1      | 1.90 | 2.88E-02 | 1.91  | 2.82E-02 | -0.40 | 6.55E-01 |
| ZNF684     | 1.90 | 2.88E-02 | 0.78  | 2.17E-01 | 1.51  | 6.53E-02 |
| KIAA0586   | 1.90 | 2.88E-02 | 1.43  | 7.59E-02 | 0.75  | 2.26E-01 |
| NXPE1      | 1.90 | 2.88E-02 | 0.83  | 2.04E-01 | 1.39  | 8.22E-02 |
| SEMA6C     | 1.90 | 2.89E-02 | 1.42  | 7.82E-02 | 0.35  | 3.62E-01 |
| C12orf56   | 1.89 | 2.91E-02 | 1.49  | 6.82E-02 | 0.54  | 2.96E-01 |

|           |      |          |       |          |       |          |
|-----------|------|----------|-------|----------|-------|----------|
| MRPL2     | 1.89 | 2.91E-02 | 0.83  | 2.04E-01 | 1.35  | 8.81E-02 |
| WDR66     | 1.89 | 2.91E-02 | 1.68  | 4.69E-02 | 0.09  | 4.63E-01 |
| NFYA      | 1.89 | 2.91E-02 | 0.14  | 4.46E-01 | 2.42  | 7.67E-03 |
| SAMM50    | 1.89 | 2.91E-02 | 1.27  | 1.03E-01 | 1.18  | 1.20E-01 |
| OR2B6     | 1.89 | 2.92E-02 | 3.14  | 8.36E-04 | -0.19 | 5.77E-01 |
| PID1      | 1.89 | 2.92E-02 | 1.47  | 7.08E-02 | 0.89  | 1.88E-01 |
| CENPW     | 1.89 | 2.93E-02 | 1.58  | 5.67E-02 | 0.21  | 4.17E-01 |
| FGL1      | 1.89 | 2.93E-02 | 0.97  | 1.65E-01 | 0.91  | 1.83E-01 |
| RAB8B     | 1.89 | 2.93E-02 | 0.92  | 1.79E-01 | 0.55  | 2.91E-01 |
| NPTXR     | 1.89 | 2.93E-02 | 0.85  | 1.97E-01 | 0.33  | 3.70E-01 |
| FBXL5     | 1.89 | 2.94E-02 | 1.45  | 7.41E-02 | 0.26  | 3.98E-01 |
| BEAN1     | 1.89 | 2.95E-02 | -0.81 | 7.90E-01 | 1.95  | 2.53E-02 |
| IRX5      | 1.89 | 2.95E-02 | 1.42  | 7.76E-02 | 0.49  | 3.13E-01 |
| GPLD1     | 1.89 | 2.96E-02 | 2.33  | 9.99E-03 | -0.36 | 6.40E-01 |
| BOD1L1    | 1.89 | 2.97E-02 | 1.26  | 1.04E-01 | 0.46  | 3.24E-01 |
| WHAMM     | 1.88 | 2.98E-02 | 0.52  | 3.02E-01 | 1.78  | 3.74E-02 |
| EDNRB     | 1.88 | 2.98E-02 | 1.33  | 9.24E-02 | 0.28  | 3.90E-01 |
| TRIM51    | 1.88 | 2.98E-02 | 1.75  | 4.04E-02 | -0.40 | 6.55E-01 |
| LHX9      | 1.88 | 2.99E-02 | 0.19  | 4.26E-01 | 1.20  | 1.15E-01 |
| KLK9      | 1.88 | 3.00E-02 | 0.98  | 1.65E-01 | 1.63  | 5.14E-02 |
| UVRAG     | 1.88 | 3.00E-02 | 1.47  | 7.08E-02 | 0.46  | 3.24E-01 |
| EPB41L4A  | 1.88 | 3.00E-02 | 1.82  | 3.46E-02 | 1.21  | 1.13E-01 |
| GRM1      | 1.88 | 3.00E-02 | 1.17  | 1.21E-01 | 0.21  | 4.18E-01 |
| FHL3      | 1.88 | 3.00E-02 | 1.63  | 5.19E-02 | 0.33  | 3.70E-01 |
| FSCN3     | 1.88 | 3.00E-02 | 0.96  | 1.69E-01 | 1.18  | 1.19E-01 |
| TEAD3     | 1.88 | 3.00E-02 | -0.11 | 5.44E-01 | 2.02  | 2.18E-02 |
| CTTN      | 1.88 | 3.01E-02 | 0.04  | 4.83E-01 | 1.88  | 2.98E-02 |
| FAM170A   | 1.88 | 3.01E-02 | 2.05  | 2.01E-02 | -0.09 | 5.35E-01 |
| LINC01119 | 1.88 | 3.01E-02 | 0.22  | 4.13E-01 | 1.63  | 5.17E-02 |
| DDX43     | 1.88 | 3.02E-02 | 2.28  | 1.12E-02 | -0.74 | 7.69E-01 |
| WDR6      | 1.88 | 3.03E-02 | 0.01  | 4.97E-01 | 2.42  | 7.69E-03 |

|          |      |          |       |          |       |          |
|----------|------|----------|-------|----------|-------|----------|
| ARF5     | 1.88 | 3.03E-02 | 0.58  | 2.80E-01 | 1.60  | 5.45E-02 |
| PBRM1    | 1.88 | 3.03E-02 | 1.38  | 8.46E-02 | 0.61  | 2.71E-01 |
| KLHL33   | 1.88 | 3.04E-02 | 1.09  | 1.38E-01 | 0.79  | 2.13E-01 |
| FOS      | 1.88 | 3.04E-02 | 2.15  | 1.59E-02 | -0.28 | 6.09E-01 |
| STX8     | 1.88 | 3.04E-02 | -0.29 | 6.14E-01 | 1.54  | 6.14E-02 |
| CCSER1   | 1.87 | 3.04E-02 | 1.83  | 3.38E-02 | 0.11  | 4.57E-01 |
| CXCL13   | 1.87 | 3.04E-02 | 0.66  | 2.55E-01 | 1.63  | 5.20E-02 |
| MICAL1   | 1.87 | 3.04E-02 | 0.30  | 3.82E-01 | 2.12  | 1.72E-02 |
| PTMA     | 1.87 | 3.05E-02 | 2.71  | 3.37E-03 | -0.43 | 6.67E-01 |
| PRR16    | 1.87 | 3.05E-02 | -0.41 | 6.60E-01 | 1.43  | 7.63E-02 |
| AURKAIP1 | 1.87 | 3.05E-02 | 0.98  | 1.63E-01 | 1.13  | 1.29E-01 |
| SPATA33  | 1.87 | 3.05E-02 | 0.48  | 3.15E-01 | 1.22  | 1.11E-01 |
| SNX29    | 1.87 | 3.06E-02 | 1.10  | 1.36E-01 | 1.70  | 4.44E-02 |
| MLYCD    | 1.87 | 3.06E-02 | 1.61  | 5.32E-02 | 0.37  | 3.55E-01 |
| ESYT1    | 1.87 | 3.07E-02 | 0.65  | 2.56E-01 | 1.05  | 1.47E-01 |
| NEDD1    | 1.87 | 3.07E-02 | -0.43 | 6.66E-01 | 3.03  | 1.24E-03 |
| CGA      | 1.87 | 3.09E-02 | 1.22  | 1.12E-01 | 0.84  | 2.02E-01 |
| YBX1     | 1.87 | 3.10E-02 | 0.34  | 3.66E-01 | 1.33  | 9.10E-02 |
| RUNDC1   | 1.87 | 3.10E-02 | 0.80  | 2.11E-01 | 1.24  | 1.08E-01 |
| HRAS     | 1.87 | 3.11E-02 | 0.92  | 1.79E-01 | 1.77  | 3.83E-02 |
| NCDN     | 1.86 | 3.11E-02 | 0.57  | 2.84E-01 | 1.29  | 9.87E-02 |
| C11orf87 | 1.86 | 3.12E-02 | -0.24 | 5.95E-01 | 2.23  | 1.30E-02 |
| HSPE1    | 1.86 | 3.12E-02 | 0.54  | 2.95E-01 | 1.52  | 6.43E-02 |
| TALDO1   | 1.86 | 3.13E-02 | 0.21  | 4.16E-01 | 1.26  | 1.04E-01 |
| SLC26A6  | 1.86 | 3.13E-02 | -0.36 | 6.39E-01 | 2.70  | 3.46E-03 |
| FSD1     | 1.86 | 3.14E-02 | 1.31  | 9.54E-02 | 0.23  | 4.08E-01 |
| GAPT     | 1.86 | 3.14E-02 | 3.01  | 1.29E-03 | -0.65 | 7.43E-01 |
| AP1AR    | 1.86 | 3.14E-02 | 0.43  | 3.32E-01 | 1.81  | 3.54E-02 |
| JAK2     | 1.86 | 3.14E-02 | 1.61  | 5.32E-02 | 0.61  | 2.70E-01 |
| CLCN2    | 1.86 | 3.14E-02 | 1.30  | 9.76E-02 | 1.18  | 1.18E-01 |
| EFCAB4A  | 1.86 | 3.15E-02 | 1.24  | 1.08E-01 | 0.34  | 3.67E-01 |

|           |      |          |       |          |       |          |
|-----------|------|----------|-------|----------|-------|----------|
| TRIM42    | 1.86 | 3.15E-02 | 1.36  | 8.62E-02 | 0.48  | 3.15E-01 |
| RUNX1     | 1.86 | 3.15E-02 | 0.41  | 3.40E-01 | 1.79  | 3.70E-02 |
| CDC42SE1  | 1.86 | 3.15E-02 | 1.95  | 2.55E-02 | -0.84 | 8.00E-01 |
| LCN8      | 1.86 | 3.16E-02 | 1.06  | 1.44E-01 | 0.78  | 2.19E-01 |
| PAXBP1    | 1.86 | 3.16E-02 | 0.17  | 4.31E-01 | 1.21  | 1.13E-01 |
| IPMK      | 1.86 | 3.17E-02 | 2.51  | 6.10E-03 | -0.73 | 7.68E-01 |
| ATP8A1    | 1.85 | 3.19E-02 | -0.10 | 5.41E-01 | 2.15  | 1.57E-02 |
| OR4K17    | 1.85 | 3.20E-02 | 1.16  | 1.24E-01 | 0.32  | 3.73E-01 |
| WBP4      | 1.85 | 3.20E-02 | 1.60  | 5.43E-02 | -0.35 | 6.37E-01 |
| XRCC5     | 1.85 | 3.21E-02 | 0.57  | 2.85E-01 | 1.32  | 9.40E-02 |
| WFDC2     | 1.85 | 3.21E-02 | 0.14  | 4.43E-01 | 1.55  | 6.11E-02 |
| ENAH      | 1.85 | 3.22E-02 | 1.80  | 3.60E-02 | -0.15 | 5.59E-01 |
| UFM1      | 1.85 | 3.22E-02 | 0.87  | 1.93E-01 | 1.35  | 8.78E-02 |
| TMSB10    | 1.85 | 3.23E-02 | 1.21  | 1.14E-01 | 0.75  | 2.28E-01 |
| OR4C46    | 1.85 | 3.23E-02 | 1.19  | 1.18E-01 | 0.82  | 2.05E-01 |
| FBXL17    | 1.85 | 3.23E-02 | 1.69  | 4.58E-02 | 1.14  | 1.27E-01 |
| C15orf52  | 1.85 | 3.24E-02 | -0.39 | 6.50E-01 | 1.93  | 2.68E-02 |
| QRICH1    | 1.85 | 3.24E-02 | -0.43 | 6.67E-01 | 2.43  | 7.64E-03 |
| C21orf119 | 1.85 | 3.24E-02 | 1.28  | 1.01E-01 | 0.96  | 1.69E-01 |
| LYST      | 1.85 | 3.24E-02 | 0.86  | 1.95E-01 | 1.58  | 5.76E-02 |
| ULK4      | 1.85 | 3.24E-02 | 2.38  | 8.73E-03 | -1.35 | 9.12E-01 |
| SETD8     | 1.84 | 3.25E-02 | 1.15  | 1.26E-01 | 1.11  | 1.34E-01 |
| CCR2      | 1.84 | 3.26E-02 | 0.95  | 1.71E-01 | 0.81  | 2.08E-01 |
| TOM1      | 1.84 | 3.27E-02 | 1.46  | 7.17E-02 | 0.24  | 4.04E-01 |
| TSC2      | 1.84 | 3.27E-02 | 1.41  | 7.91E-02 | 0.44  | 3.29E-01 |
| ABCG2     | 1.84 | 3.28E-02 | 0.75  | 2.27E-01 | 1.54  | 6.13E-02 |
| PGF       | 1.84 | 3.28E-02 | 1.80  | 3.59E-02 | 0.29  | 3.87E-01 |
| LCE5A     | 1.84 | 3.28E-02 | 1.16  | 1.23E-01 | 0.69  | 2.46E-01 |
| TP63      | 1.84 | 3.29E-02 | 2.50  | 6.15E-03 | -0.93 | 8.23E-01 |
| GTSE1     | 1.84 | 3.29E-02 | -1.08 | 8.59E-01 | 2.56  | 5.22E-03 |
| ARRDC3    | 1.84 | 3.29E-02 | 0.32  | 3.73E-01 | 1.77  | 3.85E-02 |



|                |      |          |       |          |       |          |
|----------------|------|----------|-------|----------|-------|----------|
| DENND1B        | 1.84 | 3.30E-02 | 1.47  | 7.05E-02 | 0.57  | 2.83E-01 |
| CSMD3          | 1.84 | 3.30E-02 | 2.85  | 2.22E-03 | -1.01 | 8.44E-01 |
| SYNRG          | 1.84 | 3.30E-02 | 1.29  | 9.91E-02 | -0.14 | 5.55E-01 |
| IFT27          | 1.84 | 3.32E-02 | -0.76 | 7.75E-01 | 2.62  | 4.36E-03 |
| NEU3           | 1.84 | 3.32E-02 | -0.42 | 6.64E-01 | 2.50  | 6.15E-03 |
| A4GALT         | 1.84 | 3.32E-02 | -0.20 | 5.79E-01 | 1.30  | 9.63E-02 |
| UBE2J1         | 1.83 | 3.33E-02 | 0.44  | 3.30E-01 | 0.69  | 2.45E-01 |
| RMND5B         | 1.83 | 3.33E-02 | 1.41  | 7.88E-02 | 0.51  | 3.06E-01 |
| TMEM41B        | 1.83 | 3.34E-02 | 0.26  | 3.96E-01 | 1.69  | 4.58E-02 |
| SMOX           | 1.83 | 3.35E-02 | 2.13  | 1.65E-02 | -0.11 | 5.45E-01 |
| PGRMC2         | 1.83 | 3.35E-02 | 3.04  | 1.18E-03 | 0.51  | 3.05E-01 |
| ZSCAN12        | 1.83 | 3.35E-02 | 1.32  | 9.40E-02 | 2.23  | 1.28E-02 |
| TRMU           | 1.83 | 3.36E-02 | -0.78 | 7.81E-01 | 2.37  | 8.79E-03 |
| SMIM2          | 1.83 | 3.37E-02 | 1.78  | 3.75E-02 | 0.25  | 4.00E-01 |
| FAM81A         | 1.83 | 3.37E-02 | 1.06  | 1.45E-01 | 0.70  | 2.42E-01 |
| PLXNC1         | 1.83 | 3.37E-02 | -0.63 | 7.36E-01 | 1.83  | 3.34E-02 |
| ARIH2          | 1.83 | 3.37E-02 | -0.05 | 5.20E-01 | 2.60  | 4.67E-03 |
| THAP2          | 1.83 | 3.37E-02 | 0.10  | 4.62E-01 | 1.79  | 3.65E-02 |
| CRYM           | 1.83 | 3.38E-02 | -0.38 | 6.50E-01 | 2.57  | 5.05E-03 |
| C1orf168       | 1.83 | 3.39E-02 | 0.23  | 4.08E-01 | 3.04  | 1.17E-03 |
| ST3GAL2        | 1.83 | 3.39E-02 | 2.36  | 9.09E-03 | 0.66  | 2.55E-01 |
| TMEM8C         | 1.83 | 3.39E-02 | 0.62  | 2.67E-01 | 1.05  | 1.46E-01 |
| PAK4           | 1.83 | 3.39E-02 | 0.89  | 1.86E-01 | 1.12  | 1.32E-01 |
| PRDM4          | 1.83 | 3.39E-02 | 1.47  | 7.03E-02 | 0.51  | 3.07E-01 |
| ADORA2A        | 1.83 | 3.40E-02 | 0.24  | 4.05E-01 | 1.68  | 4.68E-02 |
| RBBP8          | 1.83 | 3.40E-02 | 0.07  | 4.73E-01 | 2.25  | 1.23E-02 |
| HESX1          | 1.82 | 3.40E-02 | 0.12  | 4.52E-01 | 1.27  | 1.01E-01 |
| LYSMD1         | 1.82 | 3.41E-02 | 1.17  | 1.21E-01 | 0.31  | 3.77E-01 |
| CERS2          | 1.82 | 3.41E-02 | -0.83 | 7.96E-01 | 2.23  | 1.29E-02 |
| STON1          | 1.82 | 3.41E-02 | 2.29  | 1.11E-02 | -1.82 | 9.65E-01 |
| PTGES3L-AARSD1 | 1.82 | 3.42E-02 | 0.65  | 2.58E-01 | 1.22  | 1.11E-01 |

|         |      |          |       |          |       |          |
|---------|------|----------|-------|----------|-------|----------|
| DNLZ    | 1.82 | 3.42E-02 | 1.84  | 3.30E-02 | -0.56 | 7.11E-01 |
| ZFP28   | 1.82 | 3.43E-02 | 1.48  | 6.90E-02 | -0.14 | 5.54E-01 |
| MLN     | 1.82 | 3.43E-02 | 0.69  | 2.45E-01 | 0.74  | 2.30E-01 |
| NDUFB9  | 1.82 | 3.43E-02 | 0.86  | 1.94E-01 | 1.78  | 3.76E-02 |
| CSF2RB  | 1.82 | 3.43E-02 | 1.50  | 6.66E-02 | 0.11  | 4.58E-01 |
| TFAP2E  | 1.82 | 3.44E-02 | 0.20  | 4.20E-01 | 1.26  | 1.04E-01 |
| CTTNBP2 | 1.82 | 3.45E-02 | 1.20  | 1.14E-01 | 1.15  | 1.25E-01 |
| ESYT3   | 1.82 | 3.45E-02 | 0.78  | 2.19E-01 | 0.66  | 2.55E-01 |
| ZBTB24  | 1.82 | 3.45E-02 | 0.31  | 3.77E-01 | 2.17  | 1.49E-02 |
| SMCO3   | 1.82 | 3.45E-02 | 0.54  | 2.93E-01 | 1.07  | 1.41E-01 |
| GPR1    | 1.82 | 3.46E-02 | -0.30 | 6.16E-01 | 2.30  | 1.07E-02 |
| RAB35   | 1.82 | 3.46E-02 | 0.17  | 4.32E-01 | 1.42  | 7.81E-02 |
| GTF2E1  | 1.82 | 3.46E-02 | 1.70  | 4.45E-02 | 1.01  | 1.57E-01 |
| RPS10   | 1.82 | 3.47E-02 | 0.61  | 2.71E-01 | 1.70  | 4.43E-02 |
| FHAD1   | 1.82 | 3.47E-02 | -0.96 | 8.32E-01 | 3.40  | 3.36E-04 |
| TTC38   | 1.82 | 3.47E-02 | -0.72 | 7.64E-01 | 2.43  | 7.56E-03 |
| HSPA12B | 1.81 | 3.48E-02 | 1.03  | 1.53E-01 | 0.42  | 3.38E-01 |
| VDR     | 1.81 | 3.48E-02 | 1.50  | 6.73E-02 | 0.66  | 2.55E-01 |
| PTGES3L | 1.81 | 3.48E-02 | 0.59  | 2.78E-01 | 1.35  | 8.91E-02 |
| GML     | 1.81 | 3.49E-02 | 1.44  | 7.49E-02 | 0.84  | 2.01E-01 |
| LBP     | 1.81 | 3.49E-02 | 1.57  | 5.77E-02 | -0.06 | 5.23E-01 |
| ZFP91   | 1.81 | 3.49E-02 | -0.47 | 6.80E-01 | 2.79  | 2.66E-03 |
| RPL27A  | 1.81 | 3.50E-02 | 0.48  | 3.16E-01 | 0.74  | 2.30E-01 |
| PCM1    | 1.81 | 3.50E-02 | 0.90  | 1.85E-01 | 0.81  | 2.10E-01 |
| CCL2    | 1.81 | 3.50E-02 | 1.62  | 5.27E-02 | 0.11  | 4.55E-01 |
| VWA3A   | 1.81 | 3.50E-02 | 2.42  | 7.78E-03 | 0.07  | 4.73E-01 |
| BRINP2  | 1.81 | 3.50E-02 | 1.42  | 7.76E-02 | 1.17  | 1.21E-01 |
| PDE6H   | 1.81 | 3.51E-02 | 0.96  | 1.69E-01 | 1.06  | 1.45E-01 |
| 43160   | 1.81 | 3.51E-02 | 1.11  | 1.33E-01 | 2.24  | 1.25E-02 |
| SCUBE3  | 1.81 | 3.53E-02 | -0.05 | 5.20E-01 | 1.58  | 5.67E-02 |
| PRKRIR  | 1.81 | 3.53E-02 | -0.12 | 5.47E-01 | 2.76  | 2.89E-03 |

|            |      |          |       |          |       |          |
|------------|------|----------|-------|----------|-------|----------|
| CACFD1     | 1.81 | 3.53E-02 | -0.48 | 6.86E-01 | 1.43  | 7.67E-02 |
| FAM193A    | 1.81 | 3.54E-02 | 0.60  | 2.73E-01 | 1.14  | 1.27E-01 |
| ZBTB34     | 1.81 | 3.55E-02 | 0.96  | 1.68E-01 | 0.47  | 3.19E-01 |
| SLC25A20   | 1.80 | 3.55E-02 | -0.22 | 5.85E-01 | 2.37  | 8.88E-03 |
| UBA3       | 1.80 | 3.55E-02 | 0.26  | 3.96E-01 | 1.42  | 7.75E-02 |
| ASL        | 1.80 | 3.56E-02 | 1.83  | 3.39E-02 | -0.10 | 5.40E-01 |
| ZNF788     | 1.80 | 3.56E-02 | 0.82  | 2.06E-01 | 1.49  | 6.78E-02 |
| SUGP2      | 1.80 | 3.59E-02 | 1.71  | 4.39E-02 | 0.01  | 4.94E-01 |
| CRCT1      | 1.80 | 3.60E-02 | 0.90  | 1.84E-01 | 1.35  | 8.80E-02 |
| KLK10      | 1.80 | 3.60E-02 | 1.53  | 6.28E-02 | 0.36  | 3.61E-01 |
| FNDC3A     | 1.80 | 3.61E-02 | 0.37  | 3.54E-01 | 1.30  | 9.74E-02 |
| HORMAD1    | 1.80 | 3.61E-02 | -0.23 | 5.91E-01 | 2.05  | 2.01E-02 |
| SLC22A12   | 1.80 | 3.62E-02 | 2.53  | 5.71E-03 | -0.23 | 5.90E-01 |
| TMEM63C    | 1.80 | 3.62E-02 | 1.31  | 9.52E-02 | 0.11  | 4.58E-01 |
| RFTN2      | 1.80 | 3.63E-02 | 0.67  | 2.50E-01 | 1.53  | 6.32E-02 |
| COL1A2     | 1.79 | 3.63E-02 | 1.29  | 9.81E-02 | 1.07  | 1.43E-01 |
| COX7A1     | 1.79 | 3.64E-02 | 2.20  | 1.40E-02 | 0.42  | 3.36E-01 |
| OTX1       | 1.79 | 3.64E-02 | 0.96  | 1.68E-01 | 1.11  | 1.34E-01 |
| ZFP91-CNTF | 1.79 | 3.64E-02 | -0.53 | 7.01E-01 | 2.81  | 2.47E-03 |
| HCRTR1     | 1.79 | 3.65E-02 | 1.28  | 1.01E-01 | 0.86  | 1.96E-01 |
| CCT6A      | 1.79 | 3.65E-02 | 1.08  | 1.41E-01 | 2.28  | 1.14E-02 |
| SLC25A28   | 1.79 | 3.65E-02 | 1.81  | 3.50E-02 | -0.48 | 6.83E-01 |
| TMPRSS2    | 1.79 | 3.65E-02 | 1.96  | 2.48E-02 | 0.13  | 4.49E-01 |
| ZNF214     | 1.79 | 3.66E-02 | 2.68  | 3.69E-03 | -0.59 | 7.23E-01 |
| UCP3       | 1.79 | 3.66E-02 | -0.48 | 6.83E-01 | 2.01  | 2.23E-02 |
| FBL        | 1.79 | 3.67E-02 | 2.98  | 1.43E-03 | -0.72 | 7.65E-01 |
| KCNQ2      | 1.79 | 3.67E-02 | 0.81  | 2.08E-01 | 1.96  | 2.51E-02 |
| SUMF2      | 1.79 | 3.67E-02 | 2.27  | 1.17E-02 | 0.28  | 3.88E-01 |
| TMEM222    | 1.79 | 3.67E-02 | 1.91  | 2.78E-02 | -0.88 | 8.12E-01 |
| DENND3     | 1.79 | 3.67E-02 | 2.11  | 1.76E-02 | 0.24  | 4.04E-01 |
| KIF18A     | 1.79 | 3.68E-02 | 2.97  | 1.49E-03 | -0.54 | 7.05E-01 |

|          |      |          |       |          |       |          |
|----------|------|----------|-------|----------|-------|----------|
| MTRNR2L2 | 1.79 | 3.68E-02 | 1.37  | 8.51E-02 | 0.45  | 3.26E-01 |
| CINP     | 1.79 | 3.69E-02 | 1.13  | 1.29E-01 | 1.15  | 1.24E-01 |
| 43169    | 1.79 | 3.69E-02 | 2.09  | 1.83E-02 | -0.89 | 8.13E-01 |
| C8orf37  | 1.79 | 3.69E-02 | 1.14  | 1.28E-01 | 1.79  | 3.66E-02 |
| C17orf89 | 1.79 | 3.70E-02 | 0.20  | 4.21E-01 | 1.22  | 1.12E-01 |
| USP19    | 1.79 | 3.70E-02 | -0.82 | 7.93E-01 | 2.42  | 7.80E-03 |
| NAA60    | 1.79 | 3.71E-02 | 2.00  | 2.29E-02 | 1.49  | 6.77E-02 |
| GPR25    | 1.79 | 3.71E-02 | 0.29  | 3.86E-01 | 1.42  | 7.73E-02 |
| HELQ     | 1.79 | 3.71E-02 | 0.63  | 2.63E-01 | 1.70  | 4.47E-02 |
| NUDT14   | 1.78 | 3.71E-02 | 0.50  | 3.07E-01 | 1.59  | 5.54E-02 |
| ANKRD63  | 1.78 | 3.72E-02 | 1.08  | 1.40E-01 | 1.05  | 1.46E-01 |
| TRPM3    | 1.78 | 3.72E-02 | 0.28  | 3.91E-01 | 1.14  | 1.28E-01 |
| COX5B    | 1.78 | 3.72E-02 | 1.05  | 1.48E-01 | 1.09  | 1.37E-01 |
| NPNT     | 1.78 | 3.72E-02 | 2.09  | 1.82E-02 | -0.81 | 7.91E-01 |
| MACROD2  | 1.78 | 3.76E-02 | 1.02  | 1.53E-01 | 0.91  | 1.81E-01 |
| CISD1    | 1.78 | 3.76E-02 | 2.42  | 7.77E-03 | -0.66 | 7.45E-01 |
| P4HTM    | 1.78 | 3.76E-02 | -0.26 | 6.02E-01 | 2.11  | 1.74E-02 |
| ISY1     | 1.78 | 3.77E-02 | -1.38 | 9.16E-01 | 3.09  | 1.01E-03 |
| ZNF23    | 1.78 | 3.77E-02 | -0.66 | 7.45E-01 | 2.28  | 1.13E-02 |
| CALD1    | 1.78 | 3.77E-02 | 1.19  | 1.17E-01 | 0.13  | 4.47E-01 |
| FBXL16   | 1.78 | 3.78E-02 | 1.22  | 1.12E-01 | 0.97  | 1.67E-01 |
| MTRNR2L3 | 1.78 | 3.78E-02 | -0.04 | 5.18E-01 | 2.30  | 1.08E-02 |
| OR5D13   | 1.78 | 3.78E-02 | 1.12  | 1.30E-01 | 0.72  | 2.36E-01 |
| EIF5A    | 1.78 | 3.78E-02 | 0.93  | 1.77E-01 | 0.66  | 2.55E-01 |
| UHMK1    | 1.78 | 3.79E-02 | -1.14 | 8.74E-01 | 2.89  | 1.93E-03 |
| C6orf1   | 1.78 | 3.79E-02 | 0.88  | 1.89E-01 | 1.00  | 1.59E-01 |
| RPL3L    | 1.78 | 3.79E-02 | 1.27  | 1.03E-01 | 0.19  | 4.23E-01 |
| TAS2R46  | 1.78 | 3.79E-02 | 1.35  | 8.91E-02 | 0.13  | 4.50E-01 |
| ANKS1A   | 1.77 | 3.80E-02 | -1.31 | 9.06E-01 | 2.45  | 7.13E-03 |
| SORT1    | 1.77 | 3.80E-02 | -0.92 | 8.21E-01 | 3.30  | 4.89E-04 |
| CYSTM1   | 1.77 | 3.80E-02 | 1.33  | 9.24E-02 | 0.61  | 2.70E-01 |

|          |      |          |       |          |       |          |
|----------|------|----------|-------|----------|-------|----------|
| CXCL6    | 1.77 | 3.81E-02 | 0.16  | 4.36E-01 | 1.52  | 6.38E-02 |
| DGKZ     | 1.77 | 3.81E-02 | 0.36  | 3.60E-01 | 1.89  | 2.95E-02 |
| RPS23    | 1.77 | 3.82E-02 | -0.31 | 6.20E-01 | 1.91  | 2.78E-02 |
| HAVCR2   | 1.77 | 3.83E-02 | 0.16  | 4.37E-01 | 1.02  | 1.53E-01 |
| PPM1A    | 1.77 | 3.83E-02 | 1.25  | 1.06E-01 | 0.61  | 2.71E-01 |
| OLFML3   | 1.77 | 3.83E-02 | 1.69  | 4.56E-02 | 0.69  | 2.45E-01 |
| ACSS3    | 1.77 | 3.84E-02 | 0.69  | 2.46E-01 | 1.03  | 1.52E-01 |
| ACSM2B   | 1.77 | 3.84E-02 | 1.02  | 1.55E-01 | 0.55  | 2.93E-01 |
| SWAP70   | 1.77 | 3.84E-02 | 1.45  | 7.37E-02 | 0.57  | 2.83E-01 |
| SERTAD3  | 1.77 | 3.84E-02 | 2.32  | 1.01E-02 | -0.38 | 6.47E-01 |
| SNAPC3   | 1.77 | 3.86E-02 | 1.77  | 3.81E-02 | -0.10 | 5.39E-01 |
| RNF20    | 1.77 | 3.86E-02 | 0.60  | 2.74E-01 | 0.66  | 2.56E-01 |
| SLC17A7  | 1.77 | 3.86E-02 | 1.44  | 7.52E-02 | 1.25  | 1.06E-01 |
| C10orf62 | 1.77 | 3.86E-02 | 0.11  | 4.58E-01 | 2.20  | 1.40E-02 |
| BTN3A3   | 1.77 | 3.88E-02 | 1.16  | 1.23E-01 | 0.46  | 3.23E-01 |
| ARSI     | 1.76 | 3.89E-02 | 0.25  | 4.02E-01 | 1.31  | 9.57E-02 |
| UNC5D    | 1.76 | 3.89E-02 | 0.20  | 4.20E-01 | 2.08  | 1.87E-02 |
| THYN1    | 1.76 | 3.89E-02 | 0.12  | 4.51E-01 | 1.81  | 3.51E-02 |
| RND3     | 1.76 | 3.90E-02 | 2.61  | 4.55E-03 | -1.11 | 8.65E-01 |
| DEFB136  | 1.76 | 3.90E-02 | 0.18  | 4.30E-01 | 2.33  | 9.94E-03 |
| KPTN     | 1.76 | 3.90E-02 | 1.67  | 4.76E-02 | 1.14  | 1.28E-01 |
| SURF4    | 1.76 | 3.91E-02 | 0.27  | 3.93E-01 | 1.31  | 9.43E-02 |
| TAS2R30  | 1.76 | 3.92E-02 | 1.78  | 3.74E-02 | 0.31  | 3.76E-01 |
| TRIM38   | 1.76 | 3.92E-02 | 1.13  | 1.29E-01 | 0.09  | 4.64E-01 |
| ZNF75A   | 1.76 | 3.93E-02 | 1.54  | 6.15E-02 | 0.38  | 3.50E-01 |
| ASB17    | 1.76 | 3.93E-02 | 0.84  | 2.01E-01 | 0.71  | 2.38E-01 |
| GLOD4    | 1.76 | 3.93E-02 | 1.08  | 1.41E-01 | 0.47  | 3.19E-01 |
| MUC19    | 1.76 | 3.94E-02 | 0.10  | 4.61E-01 | 1.39  | 8.16E-02 |
| SLC25A31 | 1.76 | 3.94E-02 | 2.24  | 1.25E-02 | -0.10 | 5.41E-01 |
| SERTAD1  | 1.76 | 3.94E-02 | 2.31  | 1.06E-02 | -0.83 | 7.96E-01 |
| ECT2     | 1.76 | 3.95E-02 | 2.14  | 1.64E-02 | -0.21 | 5.82E-01 |

|         |      |          |       |          |       |          |
|---------|------|----------|-------|----------|-------|----------|
| INSL4   | 1.76 | 3.95E-02 | 1.87  | 3.09E-02 | 0.32  | 3.76E-01 |
| SV2A    | 1.76 | 3.95E-02 | 1.36  | 8.76E-02 | 0.20  | 4.19E-01 |
| TMCO1   | 1.76 | 3.95E-02 | 2.68  | 3.67E-03 | -1.39 | 9.18E-01 |
| NLRP12  | 1.75 | 3.96E-02 | 1.52  | 6.37E-02 | 0.47  | 3.19E-01 |
| GPBAR1  | 1.75 | 3.97E-02 | 1.21  | 1.13E-01 | 0.71  | 2.40E-01 |
| SF1     | 1.75 | 3.97E-02 | 0.43  | 3.34E-01 | 1.69  | 4.52E-02 |
| ANKS4B  | 1.75 | 3.98E-02 | 0.82  | 2.05E-01 | 1.47  | 7.13E-02 |
| NKX2-2  | 1.75 | 3.99E-02 | -0.70 | 7.59E-01 | 2.10  | 1.81E-02 |
| DAB1    | 1.75 | 3.99E-02 | 0.47  | 3.17E-01 | 0.31  | 3.77E-01 |
| LRRC46  | 1.75 | 4.00E-02 | 0.30  | 3.83E-01 | 2.04  | 2.06E-02 |
| OTX2    | 1.75 | 4.01E-02 | 0.23  | 4.07E-01 | 1.43  | 7.68E-02 |
| FUCA2   | 1.75 | 4.01E-02 | 0.13  | 4.49E-01 | 1.49  | 6.87E-02 |
| OR2T12  | 1.75 | 4.02E-02 | 0.86  | 1.95E-01 | 0.92  | 1.78E-01 |
| RIT1    | 1.75 | 4.02E-02 | 1.81  | 3.51E-02 | 0.27  | 3.93E-01 |
| TDRP    | 1.75 | 4.03E-02 | 0.34  | 3.67E-01 | 1.47  | 7.07E-02 |
| KSR2    | 1.75 | 4.03E-02 | 1.97  | 2.42E-02 | 0.75  | 2.27E-01 |
| ZNF197  | 1.75 | 4.03E-02 | 0.74  | 2.29E-01 | 1.10  | 1.36E-01 |
| TMEM59L | 1.75 | 4.04E-02 | 3.28  | 5.15E-04 | 0.05  | 4.79E-01 |
| MYOZ3   | 1.75 | 4.05E-02 | 1.36  | 8.68E-02 | 0.44  | 3.31E-01 |
| C8orf17 | 1.74 | 4.05E-02 | 0.72  | 2.36E-01 | 0.91  | 1.82E-01 |
| FAF1    | 1.74 | 4.06E-02 | -0.30 | 6.17E-01 | 2.13  | 1.66E-02 |
| CTSS    | 1.74 | 4.06E-02 | -0.59 | 7.22E-01 | 2.12  | 1.68E-02 |
| SLC13A1 | 1.74 | 4.06E-02 | 1.02  | 1.53E-01 | 0.96  | 1.69E-01 |
| XCR1    | 1.74 | 4.07E-02 | 0.55  | 2.93E-01 | 1.02  | 1.53E-01 |
| FABP7   | 1.74 | 4.08E-02 | 1.42  | 7.83E-02 | 0.42  | 3.38E-01 |
| KLHL41  | 1.74 | 4.09E-02 | -0.14 | 5.55E-01 | 1.92  | 2.77E-02 |
| PNPLA3  | 1.74 | 4.10E-02 | 1.15  | 1.25E-01 | 0.62  | 2.67E-01 |
| TLR6    | 1.74 | 4.10E-02 | 1.33  | 9.12E-02 | 1.13  | 1.29E-01 |
| BAZ2B   | 1.74 | 4.11E-02 | 1.33  | 9.23E-02 | 0.77  | 2.20E-01 |
| RPP25L  | 1.74 | 4.11E-02 | 2.06  | 1.95E-02 | 0.35  | 3.64E-01 |
| CPXM1   | 1.74 | 4.12E-02 | 1.43  | 7.68E-02 | -0.15 | 5.61E-01 |

|              |      |          |       |          |       |          |
|--------------|------|----------|-------|----------|-------|----------|
| LSM1         | 1.74 | 4.12E-02 | 0.26  | 3.99E-01 | 2.75  | 2.96E-03 |
| CABYR        | 1.74 | 4.12E-02 | 1.19  | 1.18E-01 | 0.35  | 3.62E-01 |
| SLC38A7      | 1.74 | 4.12E-02 | 0.86  | 1.95E-01 | 0.05  | 4.81E-01 |
| NEURL4       | 1.74 | 4.13E-02 | 0.73  | 2.33E-01 | 1.23  | 1.09E-01 |
| CHURC1-FNTB  | 1.74 | 4.13E-02 | 0.23  | 4.09E-01 | 1.03  | 1.52E-01 |
| NOL9         | 1.74 | 4.13E-02 | 0.86  | 1.94E-01 | 1.25  | 1.06E-01 |
| CDH5         | 1.74 | 4.14E-02 | 0.29  | 3.86E-01 | 1.04  | 1.49E-01 |
| FZD3         | 1.74 | 4.14E-02 | -0.89 | 8.13E-01 | 2.51  | 6.01E-03 |
| REV3L        | 1.73 | 4.14E-02 | 0.89  | 1.86E-01 | 1.59  | 5.59E-02 |
| MLTK         | 1.73 | 4.15E-02 | 0.59  | 2.78E-01 | 0.26  | 3.96E-01 |
| DUSP14       | 1.73 | 4.16E-02 | 1.01  | 1.56E-01 | 0.54  | 2.95E-01 |
| GSTCD        | 1.73 | 4.16E-02 | 0.57  | 2.84E-01 | 1.47  | 7.02E-02 |
| RING1        | 1.73 | 4.16E-02 | 2.25  | 1.21E-02 | -0.54 | 7.07E-01 |
| THUMPD2      | 1.73 | 4.16E-02 | 1.08  | 1.41E-01 | 1.27  | 1.02E-01 |
| FER          | 1.73 | 4.17E-02 | 0.33  | 3.70E-01 | 1.00  | 1.59E-01 |
| SH3RF1       | 1.73 | 4.19E-02 | 2.41  | 8.06E-03 | 1.19  | 1.18E-01 |
| LRRTM1       | 1.73 | 4.19E-02 | 1.30  | 9.62E-02 | 0.35  | 3.63E-01 |
| LYNX1        | 1.73 | 4.19E-02 | -0.15 | 5.60E-01 | 1.46  | 7.27E-02 |
| RASD2        | 1.73 | 4.19E-02 | -0.44 | 6.70E-01 | 2.47  | 6.78E-03 |
| LIPJ         | 1.73 | 4.19E-02 | -0.54 | 7.07E-01 | 2.36  | 9.13E-03 |
| TP53I3       | 1.73 | 4.20E-02 | 1.58  | 5.70E-02 | 0.01  | 4.97E-01 |
| PLA2G2F      | 1.73 | 4.21E-02 | 1.56  | 5.96E-02 | 0.20  | 4.20E-01 |
| FNTB         | 1.73 | 4.21E-02 | 0.22  | 4.13E-01 | 1.02  | 1.55E-01 |
| HERC2        | 1.73 | 4.21E-02 | 0.75  | 2.28E-01 | 1.18  | 1.20E-01 |
| COPS7B       | 1.73 | 4.21E-02 | 2.80  | 2.53E-03 | -0.98 | 8.38E-01 |
| NMRAL1       | 1.73 | 4.21E-02 | 2.11  | 1.73E-02 | -0.07 | 5.26E-01 |
| GHDC         | 1.73 | 4.22E-02 | 1.57  | 5.88E-02 | -0.06 | 5.23E-01 |
| IFIH1        | 1.72 | 4.23E-02 | 1.59  | 5.62E-02 | 0.32  | 3.76E-01 |
| FYCO1        | 1.72 | 4.23E-02 | 0.88  | 1.90E-01 | 0.46  | 3.24E-01 |
| RP11-944C7.1 | 1.72 | 4.23E-02 | 0.93  | 1.77E-01 | 0.82  | 2.05E-01 |
| CDC42BPA     | 1.72 | 4.23E-02 | 0.86  | 1.96E-01 | 1.63  | 5.16E-02 |

|          |      |          |       |          |       |          |
|----------|------|----------|-------|----------|-------|----------|
| AIF1L    | 1.72 | 4.23E-02 | 0.73  | 2.33E-01 | 1.20  | 1.14E-01 |
| BUB1     | 1.72 | 4.23E-02 | 1.14  | 1.26E-01 | 0.76  | 2.24E-01 |
| TUBA3C   | 1.72 | 4.24E-02 | 0.03  | 4.87E-01 | 1.71  | 4.36E-02 |
| MAGI1    | 1.72 | 4.24E-02 | 1.20  | 1.15E-01 | -0.46 | 6.76E-01 |
| WDR46    | 1.72 | 4.24E-02 | 1.66  | 4.82E-02 | 0.86  | 1.94E-01 |
| RAB39A   | 1.72 | 4.25E-02 | 1.22  | 1.12E-01 | 0.70  | 2.41E-01 |
| ZW10     | 1.72 | 4.25E-02 | -0.49 | 6.87E-01 | 2.03  | 2.13E-02 |
| FAM173A  | 1.72 | 4.25E-02 | 1.77  | 3.82E-02 | -0.07 | 5.29E-01 |
| NQO1     | 1.72 | 4.25E-02 | 2.16  | 1.54E-02 | 0.44  | 3.31E-01 |
| HMGXB4   | 1.72 | 4.26E-02 | 1.51  | 6.56E-02 | 0.53  | 2.99E-01 |
| MED22    | 1.72 | 4.27E-02 | 1.55  | 6.08E-02 | 0.31  | 3.78E-01 |
| CD4      | 1.72 | 4.27E-02 | 2.21  | 1.35E-02 | -0.47 | 6.82E-01 |
| NUP37    | 1.72 | 4.29E-02 | 0.71  | 2.38E-01 | 0.95  | 1.70E-01 |
| UVSSA    | 1.72 | 4.30E-02 | 0.41  | 3.40E-01 | 2.30  | 1.08E-02 |
| BTBD18   | 1.72 | 4.30E-02 | 1.03  | 1.52E-01 | 0.93  | 1.77E-01 |
| LAT2     | 1.72 | 4.31E-02 | 1.03  | 1.51E-01 | 1.59  | 5.62E-02 |
| GPN1     | 1.72 | 4.31E-02 | 0.24  | 4.04E-01 | 1.73  | 4.18E-02 |
| TADA2A   | 1.72 | 4.31E-02 | 0.84  | 2.00E-01 | 0.62  | 2.67E-01 |
| PRICKLE2 | 1.71 | 4.32E-02 | 0.00  | 4.98E-01 | 0.73  | 2.33E-01 |
| ASTN1    | 1.71 | 4.32E-02 | 1.48  | 6.98E-02 | 1.80  | 3.62E-02 |
| SPPL3    | 1.71 | 4.34E-02 | 1.15  | 1.24E-01 | 0.69  | 2.45E-01 |
| IP6K2    | 1.71 | 4.34E-02 | -0.10 | 5.40E-01 | 2.48  | 6.60E-03 |
| MPHOSPH9 | 1.71 | 4.34E-02 | 0.62  | 2.69E-01 | 1.45  | 7.40E-02 |
| OR10G6   | 1.71 | 4.34E-02 | 1.52  | 6.37E-02 | -0.14 | 5.57E-01 |
| UBE2R2   | 1.71 | 4.35E-02 | 1.16  | 1.22E-01 | -0.05 | 5.20E-01 |
| ITGA8    | 1.71 | 4.35E-02 | 0.32  | 3.75E-01 | 0.96  | 1.69E-01 |
| ANKRD10  | 1.71 | 4.36E-02 | 1.51  | 6.51E-02 | 0.66  | 2.53E-01 |
| INPP5E   | 1.71 | 4.36E-02 | 0.54  | 2.93E-01 | 0.91  | 1.82E-01 |
| MTMR10   | 1.71 | 4.37E-02 | 0.63  | 2.65E-01 | 0.82  | 2.07E-01 |
| ENO1     | 1.71 | 4.37E-02 | 2.11  | 1.75E-02 | -0.81 | 7.90E-01 |
| UPF1     | 1.71 | 4.37E-02 | 2.41  | 7.91E-03 | -1.03 | 8.49E-01 |



|            |      |          |       |          |       |          |
|------------|------|----------|-------|----------|-------|----------|
| MSANTD1    | 1.71 | 4.37E-02 | 2.98  | 1.46E-03 | -0.32 | 6.24E-01 |
| SMYD2      | 1.71 | 4.38E-02 | 1.56  | 5.96E-02 | 0.93  | 1.76E-01 |
| INTS12     | 1.71 | 4.38E-02 | 0.60  | 2.75E-01 | 1.43  | 7.69E-02 |
| OR5D18     | 1.71 | 4.39E-02 | 2.08  | 1.85E-02 | 0.40  | 3.46E-01 |
| PTPRE      | 1.71 | 4.39E-02 | 0.19  | 4.23E-01 | 1.27  | 1.02E-01 |
| ISY1-RAB43 | 1.71 | 4.39E-02 | -1.14 | 8.74E-01 | 2.93  | 1.69E-03 |
| OR2M2      | 1.71 | 4.39E-02 | -0.45 | 6.74E-01 | 2.28  | 1.13E-02 |
| DCP1B      | 1.71 | 4.40E-02 | 1.90  | 2.88E-02 | -0.16 | 5.64E-01 |
| LRRC45     | 1.71 | 4.40E-02 | 2.48  | 6.62E-03 | 0.33  | 3.71E-01 |
| C6orf163   | 1.71 | 4.41E-02 | 0.68  | 2.49E-01 | 1.27  | 1.01E-01 |
| RPL15      | 1.70 | 4.42E-02 | 1.79  | 3.70E-02 | -1.02 | 8.47E-01 |
| ZSWIM2     | 1.70 | 4.42E-02 | 0.71  | 2.38E-01 | 1.01  | 1.56E-01 |
| AK3        | 1.70 | 4.42E-02 | -0.47 | 6.80E-01 | 2.01  | 2.20E-02 |
| TRIM65     | 1.70 | 4.43E-02 | 0.83  | 2.03E-01 | 1.96  | 2.48E-02 |
| DNMT1      | 1.70 | 4.43E-02 | -0.05 | 5.22E-01 | 1.63  | 5.17E-02 |
| TNFRSF10A  | 1.70 | 4.43E-02 | 0.71  | 2.39E-01 | 1.78  | 3.79E-02 |
| ZNF17      | 1.70 | 4.44E-02 | 1.16  | 1.22E-01 | 0.73  | 2.31E-01 |
| CXCR6      | 1.70 | 4.44E-02 | 0.98  | 1.64E-01 | 0.50  | 3.08E-01 |
| ERLIN1     | 1.70 | 4.45E-02 | 0.81  | 2.10E-01 | 0.84  | 1.99E-01 |
| PCDP1      | 1.70 | 4.45E-02 | 1.01  | 1.56E-01 | 0.36  | 3.61E-01 |
| SLC36A3    | 1.70 | 4.45E-02 | -0.32 | 6.25E-01 | 2.72  | 3.23E-03 |
| PSMB2      | 1.70 | 4.46E-02 | 0.10  | 4.62E-01 | 1.36  | 8.69E-02 |
| CRK        | 1.70 | 4.46E-02 | 0.76  | 2.23E-01 | 0.77  | 2.22E-01 |
| SEC11C     | 1.70 | 4.46E-02 | -0.03 | 5.11E-01 | 2.61  | 4.50E-03 |
| SRFBP1     | 1.70 | 4.47E-02 | 0.17  | 4.33E-01 | 1.72  | 4.28E-02 |
| DNPH1      | 1.70 | 4.47E-02 | 0.41  | 3.41E-01 | 1.91  | 2.80E-02 |
| LYZL4      | 1.70 | 4.47E-02 | 2.14  | 1.60E-02 | 0.65  | 2.58E-01 |
| C1orf54    | 1.70 | 4.47E-02 | 0.72  | 2.37E-01 | 1.28  | 1.01E-01 |
| ACVR1      | 1.70 | 4.48E-02 | 1.02  | 1.53E-01 | 0.64  | 2.60E-01 |
| MEAF6      | 1.70 | 4.48E-02 | 0.79  | 2.14E-01 | 2.53  | 5.65E-03 |
| SACM1L     | 1.70 | 4.48E-02 | -0.34 | 6.33E-01 | 2.19  | 1.43E-02 |

|           |      |          |       |          |       |          |
|-----------|------|----------|-------|----------|-------|----------|
| LCORL     | 1.70 | 4.50E-02 | 1.53  | 6.35E-02 | 0.94  | 1.73E-01 |
| IPO5      | 1.70 | 4.50E-02 | 1.51  | 6.62E-02 | -0.04 | 5.15E-01 |
| CDS2      | 1.70 | 4.50E-02 | 2.04  | 2.07E-02 | -0.14 | 5.54E-01 |
| C7        | 1.70 | 4.50E-02 | 2.40  | 8.30E-03 | -0.89 | 8.15E-01 |
| APOLD1    | 1.70 | 4.50E-02 | 0.39  | 3.47E-01 | 1.73  | 4.18E-02 |
| GNGT1     | 1.69 | 4.51E-02 | 1.79  | 3.67E-02 | 0.89  | 1.86E-01 |
| KIAA0895  | 1.69 | 4.51E-02 | 0.58  | 2.81E-01 | 0.31  | 3.79E-01 |
| SFT2D2    | 1.69 | 4.51E-02 | 1.70  | 4.47E-02 | -0.35 | 6.35E-01 |
| FDFT1     | 1.69 | 4.51E-02 | -0.45 | 6.72E-01 | 3.15  | 8.04E-04 |
| C15orf53  | 1.69 | 4.52E-02 | 1.59  | 5.61E-02 | 0.52  | 3.00E-01 |
| TPM1      | 1.69 | 4.52E-02 | -0.27 | 6.05E-01 | 1.80  | 3.62E-02 |
| KLHL40    | 1.69 | 4.54E-02 | 0.44  | 3.31E-01 | 1.48  | 6.91E-02 |
| PAXIP1    | 1.69 | 4.54E-02 | 1.98  | 2.36E-02 | -0.48 | 6.84E-01 |
| KANSL1L   | 1.69 | 4.54E-02 | 2.21  | 1.36E-02 | -0.79 | 7.85E-01 |
| TMEM180   | 1.69 | 4.54E-02 | 1.09  | 1.38E-01 | 0.54  | 2.94E-01 |
| CETP      | 1.69 | 4.56E-02 | 1.12  | 1.31E-01 | 0.81  | 2.09E-01 |
| KHNYN     | 1.69 | 4.59E-02 | 0.15  | 4.41E-01 | 1.67  | 4.79E-02 |
| KIAA2026  | 1.69 | 4.60E-02 | 1.70  | 4.49E-02 | -0.03 | 5.13E-01 |
| PDP1      | 1.68 | 4.62E-02 | -0.60 | 7.25E-01 | 2.40  | 8.21E-03 |
| BMPR1B    | 1.68 | 4.62E-02 | 1.46  | 7.27E-02 | -0.61 | 7.28E-01 |
| PTER      | 1.68 | 4.63E-02 | -1.57 | 9.42E-01 | 2.92  | 1.76E-03 |
| PVRL3     | 1.68 | 4.63E-02 | 1.46  | 7.19E-02 | -0.25 | 5.99E-01 |
| OR2M3     | 1.68 | 4.63E-02 | 0.91  | 1.82E-01 | 1.02  | 1.54E-01 |
| TMEM132D  | 1.68 | 4.64E-02 | 2.10  | 1.78E-02 | 0.01  | 4.96E-01 |
| AGRN      | 1.68 | 4.64E-02 | 1.29  | 9.80E-02 | 0.95  | 1.72E-01 |
| C10orf111 | 1.68 | 4.64E-02 | 0.58  | 2.82E-01 | 0.87  | 1.93E-01 |
| C12orf39  | 1.68 | 4.64E-02 | 1.17  | 1.22E-01 | 1.23  | 1.09E-01 |
| YTHDF1    | 1.68 | 4.64E-02 | 2.10  | 1.80E-02 | -0.66 | 7.45E-01 |
| PPP2R5D   | 1.68 | 4.64E-02 | 1.63  | 5.15E-02 | 0.32  | 3.75E-01 |
| SRXN1     | 1.68 | 4.65E-02 | 0.26  | 3.99E-01 | 0.75  | 2.27E-01 |
| LIX1      | 1.68 | 4.65E-02 | -0.70 | 7.57E-01 | 2.12  | 1.71E-02 |

|         |      |          |       |          |       |          |
|---------|------|----------|-------|----------|-------|----------|
| IFITM3  | 1.68 | 4.65E-02 | 1.44  | 7.43E-02 | 0.90  | 1.85E-01 |
| XRCC1   | 1.68 | 4.65E-02 | 0.77  | 2.21E-01 | 0.97  | 1.66E-01 |
| FOSB    | 1.68 | 4.66E-02 | 1.05  | 1.46E-01 | 1.05  | 1.48E-01 |
| PPP2R2D | 1.68 | 4.66E-02 | 1.69  | 4.58E-02 | 0.18  | 4.27E-01 |
| EEF1E1  | 1.68 | 4.67E-02 | 1.06  | 1.45E-01 | 0.55  | 2.90E-01 |
| SNAPC4  | 1.68 | 4.68E-02 | 1.26  | 1.04E-01 | -0.02 | 5.07E-01 |
| ATF7IP2 | 1.68 | 4.68E-02 | 1.17  | 1.20E-01 | -0.17 | 5.69E-01 |
| METTL7A | 1.68 | 4.69E-02 | 1.35  | 8.83E-02 | 0.18  | 4.27E-01 |
| ECM1    | 1.68 | 4.69E-02 | 0.75  | 2.27E-01 | 0.98  | 1.64E-01 |
| POP5    | 1.68 | 4.69E-02 | 1.36  | 8.67E-02 | 0.05  | 4.80E-01 |
| OR1E1   | 1.68 | 4.69E-02 | 0.35  | 3.61E-01 | 1.80  | 3.57E-02 |
| SMPD2   | 1.68 | 4.69E-02 | 0.11  | 4.57E-01 | 2.13  | 1.67E-02 |
| MEF2D   | 1.67 | 4.71E-02 | 1.56  | 5.97E-02 | 0.18  | 4.27E-01 |
| GJD2    | 1.67 | 4.72E-02 | 1.70  | 4.48E-02 | 0.37  | 3.57E-01 |
| ZNF512  | 1.67 | 4.72E-02 | 0.08  | 4.68E-01 | 1.66  | 4.86E-02 |
| NIPAL1  | 1.67 | 4.72E-02 | 0.86  | 1.96E-01 | 0.32  | 3.74E-01 |
| TRMT61A | 1.67 | 4.73E-02 | 0.26  | 3.97E-01 | 1.52  | 6.37E-02 |
| SLC35A1 | 1.67 | 4.73E-02 | 0.25  | 4.03E-01 | 1.24  | 1.08E-01 |
| BFAR    | 1.67 | 4.73E-02 | 0.40  | 3.45E-01 | 1.65  | 4.90E-02 |
| SCNN1B  | 1.67 | 4.74E-02 | 1.07  | 1.43E-01 | 0.34  | 3.67E-01 |
| CACNG5  | 1.67 | 4.74E-02 | 0.43  | 3.34E-01 | 1.56  | 5.92E-02 |
| OR6C76  | 1.67 | 4.77E-02 | 0.32  | 3.76E-01 | 1.74  | 4.07E-02 |
| CLDN10  | 1.67 | 4.77E-02 | 0.13  | 4.47E-01 | 1.54  | 6.24E-02 |
| PCSK2   | 1.67 | 4.77E-02 | 1.32  | 9.34E-02 | 0.22  | 4.14E-01 |
| MDM4    | 1.67 | 4.77E-02 | -0.75 | 7.73E-01 | 2.27  | 1.15E-02 |
| WDR1    | 1.67 | 4.77E-02 | 0.54  | 2.96E-01 | 1.53  | 6.32E-02 |
| LGI1    | 1.67 | 4.78E-02 | 1.92  | 2.77E-02 | 2.29  | 1.10E-02 |
| COX19   | 1.67 | 4.78E-02 | 1.02  | 1.53E-01 | 1.73  | 4.19E-02 |
| SCN2A   | 1.67 | 4.79E-02 | 0.01  | 4.97E-01 | 1.73  | 4.19E-02 |
| PWP1    | 1.67 | 4.80E-02 | 1.52  | 6.46E-02 | 0.33  | 3.71E-01 |
| C8orf58 | 1.66 | 4.80E-02 | -0.06 | 5.26E-01 | 1.70  | 4.48E-02 |

|          |      |          |       |          |       |          |
|----------|------|----------|-------|----------|-------|----------|
| RINL     | 1.66 | 4.81E-02 | 1.45  | 7.32E-02 | 0.12  | 4.53E-01 |
| HIST1H4A | 1.66 | 4.81E-02 | 1.54  | 6.17E-02 | 0.56  | 2.87E-01 |
| NOTUM    | 1.66 | 4.81E-02 | 2.47  | 6.70E-03 | -1.50 | 9.33E-01 |
| ZNF527   | 1.66 | 4.81E-02 | 1.35  | 8.77E-02 | 0.05  | 4.80E-01 |
| NOB1     | 1.66 | 4.82E-02 | 2.49  | 6.42E-03 | 0.26  | 3.96E-01 |
| ZNF737   | 1.66 | 4.82E-02 | 1.17  | 1.20E-01 | 0.37  | 3.55E-01 |
| GGT5     | 1.66 | 4.83E-02 | -0.72 | 7.65E-01 | 2.63  | 4.24E-03 |
| EPSTI1   | 1.66 | 4.83E-02 | 0.03  | 4.86E-01 | 1.53  | 6.25E-02 |
| PSMA5    | 1.66 | 4.83E-02 | -1.58 | 9.43E-01 | 3.22  | 6.38E-04 |
| IL23R    | 1.66 | 4.84E-02 | 0.40  | 3.44E-01 | 0.44  | 3.31E-01 |
| SWI5     | 1.66 | 4.84E-02 | 2.65  | 4.01E-03 | -1.25 | 8.94E-01 |
| TSSC1    | 1.66 | 4.86E-02 | 0.67  | 2.52E-01 | 0.58  | 2.82E-01 |
| MTMR11   | 1.66 | 4.86E-02 | 1.29  | 9.90E-02 | 0.37  | 3.56E-01 |
| SHISA3   | 1.66 | 4.86E-02 | 0.27  | 3.93E-01 | 2.03  | 2.10E-02 |
| IKZF4    | 1.66 | 4.86E-02 | 0.51  | 3.06E-01 | 1.52  | 6.49E-02 |
| SNIP1    | 1.66 | 4.86E-02 | 1.45  | 7.39E-02 | 1.78  | 3.79E-02 |
| BCL10    | 1.66 | 4.86E-02 | 1.58  | 5.70E-02 | -0.92 | 8.21E-01 |
| CYP11B2  | 1.66 | 4.87E-02 | 1.59  | 5.60E-02 | 0.36  | 3.59E-01 |
| C12orf65 | 1.66 | 4.88E-02 | 0.84  | 2.00E-01 | 1.33  | 9.21E-02 |
| C11orf71 | 1.66 | 4.88E-02 | 0.50  | 3.07E-01 | 0.50  | 3.08E-01 |
| COMMD10  | 1.66 | 4.88E-02 | 1.87  | 3.04E-02 | -0.20 | 5.78E-01 |
| CLCNKB   | 1.66 | 4.88E-02 | 2.12  | 1.69E-02 | -1.02 | 8.47E-01 |
| ZNF800   | 1.66 | 4.90E-02 | 2.08  | 1.89E-02 | 0.16  | 4.35E-01 |
| FSTL3    | 1.66 | 4.90E-02 | 2.22  | 1.32E-02 | 0.19  | 4.26E-01 |
| CACNG2   | 1.65 | 4.90E-02 | -0.78 | 7.81E-01 | 1.98  | 2.37E-02 |
| SLC22A23 | 1.65 | 4.90E-02 | 1.03  | 1.51E-01 | 0.57  | 2.83E-01 |
| DUS1L    | 1.65 | 4.90E-02 | 2.26  | 1.19E-02 | -1.13 | 8.71E-01 |
| COL23A1  | 1.65 | 4.90E-02 | 1.46  | 7.17E-02 | -0.23 | 5.91E-01 |
| SMCHD1   | 1.65 | 4.91E-02 | 0.11  | 4.55E-01 | 2.14  | 1.60E-02 |
| RPL10A   | 1.65 | 4.91E-02 | 0.78  | 2.18E-01 | 2.18  | 1.45E-02 |
| MRPL19   | 1.65 | 4.94E-02 | 2.19  | 1.41E-02 | 1.66  | 4.81E-02 |

|         |      |          |       |          |       |          |
|---------|------|----------|-------|----------|-------|----------|
| SCAF4   | 1.65 | 4.94E-02 | 1.18  | 1.19E-01 | 1.51  | 6.52E-02 |
| NUDT9   | 1.65 | 4.94E-02 | -0.67 | 7.48E-01 | 2.70  | 3.43E-03 |
| SDK2    | 1.65 | 4.94E-02 | 1.21  | 1.14E-01 | -0.35 | 6.36E-01 |
| OR10A4  | 1.65 | 4.94E-02 | 1.09  | 1.37E-01 | 1.71  | 4.36E-02 |
| PBOV1   | 1.65 | 4.95E-02 | -1.10 | 8.65E-01 | 2.39  | 8.50E-03 |
| POLR3D  | 1.65 | 4.95E-02 | 1.29  | 9.83E-02 | 0.04  | 4.82E-01 |
| RABL3   | 1.65 | 4.95E-02 | 1.51  | 6.59E-02 | 1.09  | 1.38E-01 |
| TMIGD2  | 1.65 | 4.95E-02 | 0.41  | 3.41E-01 | 0.89  | 1.87E-01 |
| KLC1    | 1.65 | 4.96E-02 | 0.81  | 2.10E-01 | 1.08  | 1.41E-01 |
| ATE1    | 1.65 | 4.96E-02 | 2.42  | 7.78E-03 | 0.96  | 1.69E-01 |
| MAP1S   | 1.65 | 4.96E-02 | 0.78  | 2.17E-01 | 0.88  | 1.88E-01 |
| AARSD1  | 1.65 | 4.96E-02 | 0.78  | 2.18E-01 | 0.86  | 1.95E-01 |
| SEC16A  | 1.65 | 4.97E-02 | 0.08  | 4.67E-01 | 1.04  | 1.49E-01 |
| SRCIN1  | 1.65 | 4.97E-02 | 0.36  | 3.59E-01 | 1.06  | 1.46E-01 |
| LYSMD4  | 1.65 | 4.97E-02 | 1.46  | 7.18E-02 | -0.18 | 5.72E-01 |
| PCDH15  | 1.65 | 4.98E-02 | -0.25 | 6.00E-01 | 2.04  | 2.09E-02 |
| GABRA5  | 1.65 | 4.98E-02 | 1.47  | 7.03E-02 | -0.43 | 6.66E-01 |
| DCTN4   | 1.65 | 4.98E-02 | 1.23  | 1.10E-01 | 0.41  | 3.41E-01 |
| NKX6-3  | 1.65 | 4.98E-02 | 0.95  | 1.70E-01 | 1.06  | 1.46E-01 |
| CDKN2C  | 1.65 | 4.99E-02 | -0.42 | 6.61E-01 | 1.90  | 2.88E-02 |
| SIDT1   | 1.65 | 5.00E-02 | 1.81  | 3.55E-02 | -1.30 | 9.03E-01 |
| GUSB    | 1.64 | 5.00E-02 | 0.46  | 3.22E-01 | 1.23  | 1.10E-01 |
| LY6H    | 1.64 | 5.01E-02 | 0.91  | 1.81E-01 | 1.15  | 1.26E-01 |
| OR2F2   | 1.64 | 5.02E-02 | -0.05 | 5.21E-01 | 1.64  | 5.08E-02 |
| PRPS1L1 | 1.64 | 5.03E-02 | 2.56  | 5.27E-03 | -1.37 | 9.15E-01 |
| CDH7    | 1.64 | 5.03E-02 | 0.18  | 4.29E-01 | 2.93  | 1.70E-03 |
| DECR1   | 1.64 | 5.03E-02 | 0.33  | 3.70E-01 | 1.98  | 2.38E-02 |
| OR8G5   | 1.64 | 5.03E-02 | 1.91  | 2.78E-02 | -0.48 | 6.85E-01 |
| HSD17B8 | 1.64 | 5.05E-02 | 1.61  | 5.38E-02 | 0.44  | 3.31E-01 |
| DDX47   | 1.64 | 5.05E-02 | -0.15 | 5.60E-01 | 1.43  | 7.60E-02 |
| FAM170B | 1.64 | 5.05E-02 | 0.06  | 4.75E-01 | 1.12  | 1.31E-01 |

|         |      |          |       |          |       |          |
|---------|------|----------|-------|----------|-------|----------|
| ZNF788  | 1.64 | 5.06E-02 | 0.75  | 2.27E-01 | 1.25  | 1.06E-01 |
| UGT2B7  | 1.64 | 5.07E-02 | 0.79  | 2.15E-01 | 0.45  | 3.26E-01 |
| PLAC9   | 1.64 | 5.07E-02 | 0.34  | 3.66E-01 | 1.53  | 6.28E-02 |
| NCAM1   | 1.64 | 5.07E-02 | 0.29  | 3.86E-01 | 0.51  | 3.04E-01 |
| GBAS    | 1.64 | 5.08E-02 | 1.97  | 2.47E-02 | -0.50 | 6.93E-01 |
| TBK1    | 1.64 | 5.09E-02 | 0.35  | 3.62E-01 | 0.88  | 1.89E-01 |
| TMPRSS7 | 1.64 | 5.09E-02 | 0.16  | 4.35E-01 | 1.75  | 4.03E-02 |
| GOLPH3L | 1.64 | 5.10E-02 | -0.60 | 7.26E-01 | 2.00  | 2.30E-02 |
| FUK     | 1.63 | 5.10E-02 | 1.83  | 3.33E-02 | -0.07 | 5.28E-01 |
| NHLH2   | 1.63 | 5.10E-02 | 0.89  | 1.86E-01 | 0.53  | 2.99E-01 |
| TMEM144 | 1.63 | 5.11E-02 | 0.49  | 3.12E-01 | 0.84  | 2.02E-01 |
| VIT     | 1.63 | 5.11E-02 | 0.95  | 1.71E-01 | 3.12  | 9.10E-04 |
| 43161   | 1.63 | 5.11E-02 | 0.88  | 1.89E-01 | 0.79  | 2.15E-01 |
| GNG13   | 1.63 | 5.11E-02 | 1.51  | 6.54E-02 | 0.04  | 4.86E-01 |
| TATDN1  | 1.63 | 5.11E-02 | 1.38  | 8.38E-02 | -0.65 | 7.42E-01 |
| KCNQ1   | 1.63 | 5.11E-02 | 0.91  | 1.82E-01 | 0.54  | 2.93E-01 |
| LRFN4   | 1.63 | 5.12E-02 | 1.14  | 1.26E-01 | 1.23  | 1.09E-01 |
| TRPC1   | 1.63 | 5.12E-02 | 0.17  | 4.31E-01 | 1.78  | 3.72E-02 |
| NBEA    | 1.63 | 5.12E-02 | 1.96  | 2.49E-02 | -1.33 | 9.08E-01 |
| GPR141  | 1.63 | 5.13E-02 | 0.32  | 3.73E-01 | 1.52  | 6.47E-02 |
| KLHL11  | 1.63 | 5.13E-02 | 1.55  | 6.03E-02 | -0.07 | 5.27E-01 |
| CDH8    | 1.63 | 5.13E-02 | 1.44  | 7.47E-02 | 0.94  | 1.75E-01 |
| CUL7    | 1.63 | 5.13E-02 | 1.41  | 7.97E-02 | 0.89  | 1.87E-01 |
| SLC7A9  | 1.63 | 5.13E-02 | 2.02  | 2.19E-02 | -0.56 | 7.12E-01 |
| RSF1    | 1.63 | 5.14E-02 | 1.11  | 1.34E-01 | 1.16  | 1.24E-01 |
| SESTD1  | 1.63 | 5.14E-02 | 1.41  | 7.96E-02 | 0.31  | 3.79E-01 |
| REEP3   | 1.63 | 5.14E-02 | -0.41 | 6.58E-01 | 3.25  | 5.73E-04 |
| FANCE   | 1.63 | 5.15E-02 | 0.41  | 3.40E-01 | 1.78  | 3.78E-02 |
| NDUFB10 | 1.63 | 5.15E-02 | 1.26  | 1.04E-01 | 0.58  | 2.81E-01 |
| PEG10   | 1.63 | 5.15E-02 | 2.22  | 1.31E-02 | -0.54 | 7.06E-01 |
| SCAND3  | 1.63 | 5.15E-02 | -0.16 | 5.63E-01 | 2.56  | 5.18E-03 |

|            |      |          |       |          |       |          |
|------------|------|----------|-------|----------|-------|----------|
| BCL7A      | 1.63 | 5.16E-02 | 1.16  | 1.23E-01 | -0.06 | 5.24E-01 |
| FAM20B     | 1.63 | 5.16E-02 | 0.98  | 1.63E-01 | 0.49  | 3.12E-01 |
| ARHGEF2    | 1.63 | 5.16E-02 | 1.47  | 7.13E-02 | -0.19 | 5.77E-01 |
| TFDP2      | 1.63 | 5.16E-02 | 0.16  | 4.37E-01 | 1.15  | 1.26E-01 |
| MTF1       | 1.63 | 5.17E-02 | 0.14  | 4.43E-01 | 2.24  | 1.25E-02 |
| OR4C15     | 1.63 | 5.17E-02 | 1.49  | 6.78E-02 | 0.47  | 3.20E-01 |
| CTSL       | 1.63 | 5.19E-02 | 0.51  | 3.06E-01 | 1.12  | 1.31E-01 |
| MCM8       | 1.63 | 5.19E-02 | 1.26  | 1.04E-01 | 0.08  | 4.69E-01 |
| BTF3       | 1.63 | 5.19E-02 | 0.82  | 2.05E-01 | 0.78  | 2.18E-01 |
| SRSF9      | 1.63 | 5.19E-02 | 0.95  | 1.71E-01 | 0.52  | 3.00E-01 |
| GATC       | 1.63 | 5.20E-02 | 1.15  | 1.25E-01 | -0.06 | 5.22E-01 |
| AC090616.2 | 1.63 | 5.20E-02 | 1.84  | 3.27E-02 | -0.31 | 6.24E-01 |
| OR5H1      | 1.62 | 5.22E-02 | 1.34  | 9.08E-02 | 0.37  | 3.54E-01 |
| ADCY7      | 1.62 | 5.23E-02 | 1.58  | 5.72E-02 | -0.03 | 5.10E-01 |
| KAT5       | 1.62 | 5.23E-02 | 1.33  | 9.17E-02 | -0.31 | 6.22E-01 |
| MYEOV2     | 1.62 | 5.24E-02 | 0.15  | 4.40E-01 | 1.71  | 4.40E-02 |
| NDUFB5     | 1.62 | 5.24E-02 | 0.64  | 2.60E-01 | 1.02  | 1.54E-01 |
| HMGA1      | 1.62 | 5.24E-02 | 0.89  | 1.88E-01 | 1.26  | 1.04E-01 |
| RBM25      | 1.62 | 5.24E-02 | 1.08  | 1.40E-01 | 0.81  | 2.10E-01 |
| HIST1H3J   | 1.62 | 5.24E-02 | 0.57  | 2.84E-01 | 0.68  | 2.48E-01 |
| PLXNA2     | 1.62 | 5.26E-02 | 2.36  | 9.03E-03 | -0.72 | 7.63E-01 |
| RAD23B     | 1.62 | 5.26E-02 | 1.97  | 2.46E-02 | -0.54 | 7.05E-01 |
| LACTB2     | 1.62 | 5.26E-02 | 2.69  | 3.54E-03 | -0.94 | 8.26E-01 |
| CLRN3      | 1.62 | 5.27E-02 | -0.63 | 7.35E-01 | 1.89  | 2.91E-02 |
| POMGNT2    | 1.62 | 5.27E-02 | -1.20 | 8.85E-01 | 2.24  | 1.26E-02 |
| ARMC6      | 1.62 | 5.27E-02 | 1.44  | 7.45E-02 | 0.07  | 4.71E-01 |
| UTRN       | 1.62 | 5.27E-02 | -0.22 | 5.86E-01 | 2.24  | 1.25E-02 |
| OR14C36    | 1.62 | 5.27E-02 | 0.45  | 3.25E-01 | 1.40  | 8.04E-02 |
| NHSL1      | 1.62 | 5.27E-02 | 1.09  | 1.37E-01 | 0.47  | 3.20E-01 |
| HINT2      | 1.62 | 5.27E-02 | -0.09 | 5.36E-01 | 2.11  | 1.74E-02 |
| SUSD4      | 1.62 | 5.27E-02 | -0.03 | 5.11E-01 | 3.10  | 9.77E-04 |

|             |      |          |       |          |       |          |
|-------------|------|----------|-------|----------|-------|----------|
| CDK2AP1     | 1.62 | 5.29E-02 | 0.77  | 2.21E-01 | 0.98  | 1.63E-01 |
| RIMS1       | 1.62 | 5.29E-02 | 1.74  | 4.12E-02 | -0.50 | 6.92E-01 |
| GRIK5       | 1.62 | 5.29E-02 | 0.96  | 1.67E-01 | 0.57  | 2.85E-01 |
| CHN1        | 1.62 | 5.29E-02 | 0.76  | 2.23E-01 | 0.98  | 1.63E-01 |
| MYL6        | 1.62 | 5.30E-02 | 0.16  | 4.35E-01 | 1.55  | 6.01E-02 |
| MGA         | 1.62 | 5.30E-02 | 0.66  | 2.55E-01 | 0.27  | 3.92E-01 |
| PARPBP      | 1.62 | 5.30E-02 | 1.41  | 7.95E-02 | 0.68  | 2.49E-01 |
| CLNS1A      | 1.62 | 5.30E-02 | 1.77  | 3.85E-02 | -0.60 | 7.27E-01 |
| OR4A5       | 1.62 | 5.30E-02 | 1.66  | 4.83E-02 | -0.34 | 6.35E-01 |
| TGS1        | 1.62 | 5.30E-02 | -0.13 | 5.51E-01 | 1.72  | 4.24E-02 |
| HDLBP       | 1.62 | 5.30E-02 | -0.13 | 5.51E-01 | 1.27  | 1.03E-01 |
| FAM101B     | 1.61 | 5.33E-02 | 0.61  | 2.72E-01 | 0.70  | 2.41E-01 |
| CHRD        | 1.61 | 5.34E-02 | 0.31  | 3.77E-01 | 0.93  | 1.76E-01 |
| ZNF691      | 1.61 | 5.34E-02 | 1.38  | 8.33E-02 | 0.85  | 1.97E-01 |
| APOC4       | 1.61 | 5.35E-02 | 0.27  | 3.92E-01 | 1.19  | 1.16E-01 |
| APOC4-APOC2 | 1.61 | 5.35E-02 | 0.27  | 3.92E-01 | 1.19  | 1.16E-01 |
| MAP3K12     | 1.61 | 5.35E-02 | 0.71  | 2.39E-01 | 0.41  | 3.42E-01 |
| PSD2        | 1.61 | 5.35E-02 | -0.48 | 6.84E-01 | 2.01  | 2.24E-02 |
| CHIA        | 1.61 | 5.36E-02 | 0.77  | 2.19E-01 | 0.61  | 2.71E-01 |
| PEX3        | 1.61 | 5.36E-02 | -0.10 | 5.40E-01 | 1.30  | 9.60E-02 |
| C2orf44     | 1.61 | 5.37E-02 | 1.24  | 1.08E-01 | -0.06 | 5.25E-01 |
| LMBRD1      | 1.61 | 5.37E-02 | 1.48  | 6.92E-02 | 0.09  | 4.62E-01 |
| PPP4R1L     | 1.61 | 5.37E-02 | 0.12  | 4.52E-01 | 1.30  | 9.73E-02 |
| SIM1        | 1.61 | 5.38E-02 | 0.32  | 3.75E-01 | 1.52  | 6.43E-02 |
| SF3B14      | 1.61 | 5.38E-02 | 1.23  | 1.10E-01 | 0.44  | 3.29E-01 |
| SERPINE2    | 1.61 | 5.39E-02 | -0.81 | 7.91E-01 | 2.32  | 1.01E-02 |
| MAP1A       | 1.61 | 5.39E-02 | 1.72  | 4.26E-02 | 0.35  | 3.63E-01 |
| FAM217A     | 1.61 | 5.39E-02 | 1.18  | 1.18E-01 | 0.26  | 3.98E-01 |
| ARNTL2      | 1.61 | 5.39E-02 | 2.02  | 2.17E-02 | -0.68 | 7.52E-01 |
| STX11       | 1.61 | 5.40E-02 | -0.67 | 7.47E-01 | 2.02  | 2.15E-02 |
| RPL41       | 1.61 | 5.40E-02 | 0.38  | 3.52E-01 | 1.31  | 9.49E-02 |



|               |      |          |       |          |       |          |
|---------------|------|----------|-------|----------|-------|----------|
| PLAUR         | 1.61 | 5.40E-02 | -0.50 | 6.92E-01 | 2.04  | 2.06E-02 |
| OR52A1        | 1.61 | 5.40E-02 | 1.58  | 5.70E-02 | -0.62 | 7.32E-01 |
| ZNF571        | 1.61 | 5.41E-02 | 1.15  | 1.25E-01 | 0.27  | 3.92E-01 |
| CRCP          | 1.61 | 5.42E-02 | 1.59  | 5.55E-02 | -0.04 | 5.15E-01 |
| COMP          | 1.61 | 5.42E-02 | 2.46  | 6.91E-03 | 0.79  | 2.15E-01 |
| DNAL4         | 1.61 | 5.42E-02 | 0.73  | 2.32E-01 | 0.27  | 3.94E-01 |
| EIF2B3        | 1.60 | 5.43E-02 | 2.82  | 2.42E-03 | -0.65 | 7.43E-01 |
| HMOX2         | 1.60 | 5.43E-02 | 2.02  | 2.19E-02 | 0.02  | 4.92E-01 |
| LRRC58        | 1.60 | 5.44E-02 | 2.57  | 5.04E-03 | -1.96 | 9.75E-01 |
| F3            | 1.60 | 5.44E-02 | 1.35  | 8.79E-02 | 0.58  | 2.82E-01 |
| TSPAN5        | 1.60 | 5.44E-02 | 0.47  | 3.18E-01 | 0.90  | 1.84E-01 |
| AGPAT3        | 1.60 | 5.45E-02 | 1.81  | 3.50E-02 | 2.16  | 1.52E-02 |
| PLA2G4B       | 1.60 | 5.45E-02 | 0.58  | 2.81E-01 | 0.37  | 3.54E-01 |
| JMJD7-PLA2G4B | 1.60 | 5.45E-02 | 0.58  | 2.81E-01 | 0.37  | 3.54E-01 |
| SNRNP35       | 1.60 | 5.45E-02 | 1.24  | 1.07E-01 | 0.31  | 3.80E-01 |
| PLEKHH2       | 1.60 | 5.45E-02 | 1.14  | 1.27E-01 | 0.60  | 2.75E-01 |
| SLC26A9       | 1.60 | 5.46E-02 | 0.34  | 3.68E-01 | 0.93  | 1.77E-01 |
| PINLYP        | 1.60 | 5.46E-02 | 0.69  | 2.44E-01 | 1.40  | 8.03E-02 |
| WBP11         | 1.60 | 5.46E-02 | 0.31  | 3.79E-01 | 1.32  | 9.39E-02 |
| NPM1          | 1.60 | 5.47E-02 | 1.11  | 1.34E-01 | 0.16  | 4.35E-01 |
| GDF15         | 1.60 | 5.47E-02 | 0.23  | 4.09E-01 | 1.37  | 8.55E-02 |
| SLC25A3       | 1.60 | 5.48E-02 | 2.77  | 2.80E-03 | -0.46 | 6.79E-01 |
| RAB6B         | 1.60 | 5.48E-02 | 3.31  | 4.58E-04 | -0.45 | 6.75E-01 |
| LYPD4         | 1.60 | 5.49E-02 | 1.00  | 1.60E-01 | 0.78  | 2.18E-01 |
| PSD3          | 1.60 | 5.49E-02 | 2.44  | 7.41E-03 | -0.75 | 7.75E-01 |
| ACVRL1        | 1.60 | 5.49E-02 | 0.93  | 1.75E-01 | 0.54  | 2.95E-01 |
| TCHHL1        | 1.60 | 5.49E-02 | 1.34  | 9.06E-02 | 0.51  | 3.06E-01 |
| RAB43         | 1.60 | 5.50E-02 | -0.89 | 8.14E-01 | 2.75  | 2.99E-03 |
| LETMD1        | 1.60 | 5.50E-02 | 2.33  | 9.96E-03 | 0.72  | 2.35E-01 |
| CALHM3        | 1.60 | 5.52E-02 | 1.95  | 2.55E-02 | -0.20 | 5.81E-01 |
| ZNF668        | 1.60 | 5.53E-02 | 2.20  | 1.40E-02 | -0.54 | 7.07E-01 |

|               |      |          |       |          |       |          |
|---------------|------|----------|-------|----------|-------|----------|
| KLHL22        | 1.60 | 5.53E-02 | 1.85  | 3.23E-02 | -0.11 | 5.46E-01 |
| EFTUD1        | 1.59 | 5.54E-02 | 0.22  | 4.12E-01 | 1.39  | 8.16E-02 |
| PROM1         | 1.59 | 5.54E-02 | 2.78  | 2.72E-03 | -0.23 | 5.91E-01 |
| CREG2         | 1.59 | 5.55E-02 | 0.90  | 1.85E-01 | 0.90  | 1.85E-01 |
| KLK9          | 1.59 | 5.55E-02 | 0.85  | 1.97E-01 | 2.08  | 1.88E-02 |
| KIAA0513      | 1.59 | 5.56E-02 | 0.53  | 3.00E-01 | 0.36  | 3.58E-01 |
| MYCN          | 1.59 | 5.56E-02 | 0.63  | 2.66E-01 | 0.88  | 1.90E-01 |
| VSTM5         | 1.59 | 5.58E-02 | 0.94  | 1.74E-01 | 0.27  | 3.92E-01 |
| NCCRP1        | 1.59 | 5.58E-02 | 1.32  | 9.38E-02 | 0.41  | 3.41E-01 |
| NDUFB4        | 1.59 | 5.58E-02 | 0.83  | 2.04E-01 | 1.03  | 1.52E-01 |
| RP11-477N12.3 | 1.59 | 5.59E-02 | -0.15 | 5.58E-01 | 1.29  | 9.87E-02 |
| MRGPRG        | 1.59 | 5.59E-02 | -0.12 | 5.49E-01 | 1.97  | 2.43E-02 |
| CCDC37        | 1.59 | 5.59E-02 | 1.19  | 1.17E-01 | 1.62  | 5.29E-02 |
| GNL2          | 1.59 | 5.60E-02 | 1.61  | 5.36E-02 | 1.76  | 3.91E-02 |
| C9orf153      | 1.59 | 5.61E-02 | 0.89  | 1.86E-01 | 1.25  | 1.06E-01 |
| SOAT1         | 1.59 | 5.61E-02 | 0.83  | 2.03E-01 | 0.69  | 2.46E-01 |
| CNGA1         | 1.59 | 5.62E-02 | 0.80  | 2.13E-01 | 0.21  | 4.15E-01 |
| CACNA2D3      | 1.59 | 5.62E-02 | 2.46  | 6.87E-03 | 0.94  | 1.73E-01 |
| A1CF          | 1.59 | 5.63E-02 | 0.65  | 2.56E-01 | 0.58  | 2.81E-01 |
| AP3B2         | 1.59 | 5.63E-02 | 1.22  | 1.11E-01 | 1.41  | 7.97E-02 |
| SPCS2         | 1.59 | 5.63E-02 | -0.77 | 7.81E-01 | 2.04  | 2.06E-02 |
| OGFOD2        | 1.59 | 5.64E-02 | 0.73  | 2.32E-01 | 0.94  | 1.73E-01 |
| ZNF540        | 1.59 | 5.64E-02 | 1.07  | 1.43E-01 | 0.30  | 3.82E-01 |
| THBS2         | 1.59 | 5.65E-02 | 0.59  | 2.77E-01 | 2.87  | 2.05E-03 |
| ADAP1         | 1.59 | 5.65E-02 | 1.32  | 9.36E-02 | 0.44  | 3.29E-01 |
| AMD1          | 1.58 | 5.65E-02 | 0.18  | 4.30E-01 | 1.70  | 4.45E-02 |
| ADAMTS16      | 1.58 | 5.65E-02 | 2.13  | 1.68E-02 | -0.25 | 6.00E-01 |
| GDF1          | 1.58 | 5.66E-02 | 2.50  | 6.18E-03 | -1.18 | 8.81E-01 |
| CERS1         | 1.58 | 5.66E-02 | 2.50  | 6.18E-03 | -1.18 | 8.81E-01 |
| PSIP1         | 1.58 | 5.67E-02 | 1.47  | 7.02E-02 | 0.20  | 4.19E-01 |
| NGB           | 1.58 | 5.67E-02 | 0.69  | 2.45E-01 | 0.01  | 4.94E-01 |

|            |      |          |       |          |       |          |
|------------|------|----------|-------|----------|-------|----------|
| SMAD9      | 1.58 | 5.68E-02 | 0.49  | 3.14E-01 | 0.87  | 1.93E-01 |
| MYB        | 1.58 | 5.69E-02 | 1.30  | 9.66E-02 | -0.04 | 5.16E-01 |
| TMEM38A    | 1.58 | 5.69E-02 | 0.20  | 4.20E-01 | 0.90  | 1.85E-01 |
| WDR33      | 1.58 | 5.70E-02 | 0.45  | 3.28E-01 | 1.36  | 8.65E-02 |
| PLA2G12A   | 1.58 | 5.70E-02 | 0.96  | 1.69E-01 | 0.57  | 2.83E-01 |
| PIK3CG     | 1.58 | 5.71E-02 | 1.86  | 3.12E-02 | 0.73  | 2.31E-01 |
| PSMA8      | 1.58 | 5.71E-02 | -0.65 | 7.43E-01 | 1.95  | 2.53E-02 |
| STK38L     | 1.58 | 5.71E-02 | 1.75  | 4.02E-02 | -0.94 | 8.27E-01 |
| PATL2      | 1.58 | 5.73E-02 | 0.31  | 3.78E-01 | 1.02  | 1.54E-01 |
| LILRA4     | 1.58 | 5.74E-02 | 0.37  | 3.56E-01 | 1.34  | 9.04E-02 |
| ZC3H10     | 1.58 | 5.74E-02 | 0.32  | 3.74E-01 | 1.32  | 9.40E-02 |
| CCDC13     | 1.58 | 5.76E-02 | 1.02  | 1.53E-01 | 0.90  | 1.83E-01 |
| HNMT       | 1.58 | 5.76E-02 | 0.28  | 3.89E-01 | 1.31  | 9.53E-02 |
| KLHDC3     | 1.57 | 5.77E-02 | 0.70  | 2.43E-01 | 1.12  | 1.32E-01 |
| GCH1       | 1.57 | 5.77E-02 | 1.77  | 3.80E-02 | -0.14 | 5.55E-01 |
| TMEM60     | 1.57 | 5.77E-02 | 0.35  | 3.61E-01 | 1.15  | 1.25E-01 |
| CPOX       | 1.57 | 5.78E-02 | -0.32 | 6.27E-01 | 1.54  | 6.17E-02 |
| NME1-NME2  | 1.57 | 5.78E-02 | 1.43  | 7.63E-02 | 1.04  | 1.50E-01 |
| NME2       | 1.57 | 5.78E-02 | 1.43  | 7.63E-02 | 1.04  | 1.50E-01 |
| TRABD      | 1.57 | 5.78E-02 | 2.22  | 1.32E-02 | -0.28 | 6.09E-01 |
| ATP8B1     | 1.57 | 5.78E-02 | 0.79  | 2.15E-01 | -0.04 | 5.16E-01 |
| FHIT       | 1.57 | 5.79E-02 | 1.59  | 5.63E-02 | 1.16  | 1.24E-01 |
| FILIP1     | 1.57 | 5.79E-02 | 2.07  | 1.92E-02 | -0.62 | 7.32E-01 |
| CORIN      | 1.57 | 5.80E-02 | 0.82  | 2.07E-01 | 1.10  | 1.37E-01 |
| DNAJC7     | 1.57 | 5.81E-02 | 0.68  | 2.49E-01 | 0.91  | 1.82E-01 |
| OLFM3      | 1.57 | 5.81E-02 | 1.23  | 1.09E-01 | 0.75  | 2.27E-01 |
| FAM155A    | 1.57 | 5.81E-02 | 0.08  | 4.66E-01 | 1.07  | 1.41E-01 |
| RPS6KL1    | 1.57 | 5.81E-02 | 1.81  | 3.49E-02 | 0.05  | 4.80E-01 |
| ZIC2       | 1.57 | 5.82E-02 | 0.76  | 2.24E-01 | 0.61  | 2.72E-01 |
| CCDC141    | 1.57 | 5.82E-02 | 1.15  | 1.26E-01 | 1.45  | 7.30E-02 |
| PAXIP1-AS2 | 1.57 | 5.83E-02 | 1.93  | 2.68E-02 | -0.72 | 7.64E-01 |

|          |      |          |       |          |       |          |
|----------|------|----------|-------|----------|-------|----------|
| RASL10B  | 1.57 | 5.83E-02 | 0.26  | 3.97E-01 | 1.07  | 1.42E-01 |
| RALBP1   | 1.57 | 5.84E-02 | 1.49  | 6.77E-02 | 0.27  | 3.93E-01 |
| GJB7     | 1.57 | 5.84E-02 | 0.68  | 2.47E-01 | 1.09  | 1.38E-01 |
| XKR9     | 1.57 | 5.84E-02 | 2.36  | 9.05E-03 | -0.99 | 8.39E-01 |
| IGJ      | 1.57 | 5.84E-02 | 0.69  | 2.45E-01 | 1.09  | 1.38E-01 |
| TMBIM4   | 1.57 | 5.84E-02 | 1.43  | 7.60E-02 | -0.40 | 6.54E-01 |
| TMBIM4   | 1.57 | 5.84E-02 | 1.43  | 7.60E-02 | -0.40 | 6.54E-01 |
| LMNB1    | 1.57 | 5.85E-02 | 3.51  | 2.23E-04 | -0.43 | 6.68E-01 |
| RHOC     | 1.57 | 5.85E-02 | 2.21  | 1.37E-02 | -1.48 | 9.31E-01 |
| KLHDC7A  | 1.57 | 5.85E-02 | 0.87  | 1.93E-01 | 0.58  | 2.80E-01 |
| GAMT     | 1.57 | 5.86E-02 | 1.86  | 3.13E-02 | -0.80 | 7.88E-01 |
| TNS3     | 1.57 | 5.86E-02 | -0.33 | 6.28E-01 | 0.57  | 2.86E-01 |
| MUCL1    | 1.57 | 5.86E-02 | 2.70  | 3.45E-03 | 0.60  | 2.74E-01 |
| ATP5G2   | 1.56 | 5.88E-02 | 0.62  | 2.66E-01 | 0.82  | 2.05E-01 |
| C3       | 1.56 | 5.88E-02 | 2.78  | 2.72E-03 | -0.30 | 6.20E-01 |
| IGSF11   | 1.56 | 5.88E-02 | 0.16  | 4.37E-01 | 0.89  | 1.87E-01 |
| SIPA1L3  | 1.56 | 5.89E-02 | 0.61  | 2.72E-01 | 0.55  | 2.91E-01 |
| NLRP14   | 1.56 | 5.90E-02 | 2.43  | 7.49E-03 | -1.08 | 8.59E-01 |
| CHORDC1  | 1.56 | 5.90E-02 | 1.65  | 4.92E-02 | -0.08 | 5.31E-01 |
| ZNF611   | 1.56 | 5.91E-02 | -0.11 | 5.42E-01 | 1.84  | 3.26E-02 |
| CTC1     | 1.56 | 5.91E-02 | 1.24  | 1.08E-01 | 1.14  | 1.28E-01 |
| PKP1     | 1.56 | 5.91E-02 | -0.27 | 6.06E-01 | 1.83  | 3.34E-02 |
| ABCA5    | 1.56 | 5.92E-02 | 1.33  | 9.16E-02 | 0.65  | 2.58E-01 |
| ARL6IP6  | 1.56 | 5.92E-02 | 1.99  | 2.35E-02 | -0.08 | 5.33E-01 |
| OR4M2    | 1.56 | 5.92E-02 | 0.62  | 2.69E-01 | 1.23  | 1.10E-01 |
| APOPT1   | 1.56 | 5.93E-02 | 0.49  | 3.13E-01 | 1.51  | 6.54E-02 |
| SEC22C   | 1.56 | 5.93E-02 | 0.48  | 3.17E-01 | 0.97  | 1.66E-01 |
| POLR2H   | 1.56 | 5.94E-02 | 2.43  | 7.53E-03 | 0.60  | 2.74E-01 |
| TNFRSF14 | 1.56 | 5.94E-02 | 2.02  | 2.18E-02 | 0.62  | 2.68E-01 |
| OR6X1    | 1.56 | 5.95E-02 | 1.53  | 6.26E-02 | -0.46 | 6.75E-01 |
| BIRC8    | 1.56 | 5.95E-02 | 1.54  | 6.19E-02 | -0.39 | 6.51E-01 |

|             |      |          |       |          |       |          |
|-------------|------|----------|-------|----------|-------|----------|
| ICAM5       | 1.56 | 5.95E-02 | 2.35  | 9.35E-03 | 1.12  | 1.32E-01 |
| CEP104      | 1.56 | 5.95E-02 | 1.37  | 8.60E-02 | 0.69  | 2.44E-01 |
| GRID1       | 1.56 | 5.95E-02 | 0.01  | 4.96E-01 | 1.35  | 8.88E-02 |
| ZNF263      | 1.56 | 5.95E-02 | 1.33  | 9.25E-02 | 0.24  | 4.04E-01 |
| HMGN4       | 1.56 | 5.96E-02 | 1.87  | 3.06E-02 | -0.32 | 6.25E-01 |
| PCOLCE      | 1.56 | 5.96E-02 | 0.52  | 3.01E-01 | 1.33  | 9.25E-02 |
| OR12D3      | 1.56 | 5.97E-02 | 0.12  | 4.52E-01 | 1.48  | 6.95E-02 |
| NCR1        | 1.56 | 5.98E-02 | 1.21  | 1.13E-01 | -0.05 | 5.19E-01 |
| CTR9        | 1.56 | 5.98E-02 | 1.18  | 1.18E-01 | 0.58  | 2.81E-01 |
| TFPT        | 1.56 | 5.99E-02 | 0.90  | 1.84E-01 | 0.31  | 3.77E-01 |
| LMAN2       | 1.55 | 6.00E-02 | 1.43  | 7.66E-02 | -0.20 | 5.80E-01 |
| AIM1        | 1.55 | 6.00E-02 | 1.98  | 2.40E-02 | -0.66 | 7.45E-01 |
| C1orf137    | 1.55 | 6.01E-02 | 0.80  | 2.12E-01 | 0.34  | 3.66E-01 |
| FABP9       | 1.55 | 6.01E-02 | 1.39  | 8.23E-02 | 1.40  | 8.12E-02 |
| IMPA1       | 1.55 | 6.02E-02 | 0.77  | 2.20E-01 | 1.64  | 5.02E-02 |
| DDB2        | 1.55 | 6.02E-02 | 0.45  | 3.28E-01 | 1.49  | 6.78E-02 |
| CHUK        | 1.55 | 6.03E-02 | 0.80  | 2.12E-01 | 0.84  | 2.01E-01 |
| WASL        | 1.55 | 6.03E-02 | 2.23  | 1.28E-02 | 0.33  | 3.69E-01 |
| PLXNA4      | 1.55 | 6.04E-02 | 0.51  | 3.06E-01 | -0.76 | 7.75E-01 |
| CHCHD3      | 1.55 | 6.04E-02 | 1.11  | 1.33E-01 | 1.93  | 2.71E-02 |
| ABTB2       | 1.55 | 6.04E-02 | 1.74  | 4.09E-02 | -1.61 | 9.46E-01 |
| CYP4A22     | 1.55 | 6.05E-02 | 0.43  | 3.35E-01 | 0.96  | 1.68E-01 |
| HSPD1       | 1.55 | 6.05E-02 | 0.64  | 2.62E-01 | 1.25  | 1.06E-01 |
| SURF2       | 1.55 | 6.05E-02 | -0.04 | 5.15E-01 | 1.52  | 6.45E-02 |
| NME1        | 1.55 | 6.07E-02 | 1.42  | 7.72E-02 | 0.18  | 4.27E-01 |
| RBAK-RBAKDN | 1.55 | 6.07E-02 | 0.46  | 3.23E-01 | 1.76  | 3.92E-02 |
| MFNG        | 1.55 | 6.07E-02 | 1.59  | 5.64E-02 | -0.51 | 6.94E-01 |
| TAS2R31     | 1.55 | 6.07E-02 | 1.77  | 3.86E-02 | 0.18  | 4.30E-01 |
| LYZ         | 1.55 | 6.08E-02 | 0.23  | 4.11E-01 | 1.08  | 1.40E-01 |
| GPX2        | 1.55 | 6.08E-02 | -0.25 | 5.99E-01 | 1.51  | 6.58E-02 |
| SPTLC1      | 1.55 | 6.09E-02 | 0.82  | 2.07E-01 | 0.93  | 1.76E-01 |

|           |      |          |       |          |       |          |
|-----------|------|----------|-------|----------|-------|----------|
| GAREML    | 1.55 | 6.09E-02 | 2.77  | 2.81E-03 | -0.09 | 5.35E-01 |
| MAP3K11   | 1.55 | 6.10E-02 | 2.12  | 1.70E-02 | -1.40 | 9.18E-01 |
| AMN       | 1.55 | 6.10E-02 | 2.05  | 2.02E-02 | 0.09  | 4.63E-01 |
| TTC3      | 1.55 | 6.11E-02 | 0.54  | 2.93E-01 | 0.88  | 1.90E-01 |
| TCF7L2    | 1.55 | 6.12E-02 | 0.41  | 3.41E-01 | 0.82  | 2.07E-01 |
| ARL6IP4   | 1.55 | 6.12E-02 | 0.92  | 1.79E-01 | 0.92  | 1.78E-01 |
| KTN1      | 1.54 | 6.12E-02 | 2.04  | 2.07E-02 | -0.10 | 5.41E-01 |
| MFSD4     | 1.54 | 6.13E-02 | 0.68  | 2.47E-01 | 1.48  | 6.97E-02 |
| TUB       | 1.54 | 6.13E-02 | 0.71  | 2.39E-01 | 1.59  | 5.62E-02 |
| HIST1H2BC | 1.54 | 6.14E-02 | 0.50  | 3.10E-01 | 0.54  | 2.95E-01 |
| TRIM29    | 1.54 | 6.14E-02 | 2.03  | 2.12E-02 | 0.87  | 1.92E-01 |
| AQP11     | 1.54 | 6.15E-02 | 1.70  | 4.48E-02 | -0.41 | 6.61E-01 |
| SAMD7     | 1.54 | 6.16E-02 | 2.03  | 2.11E-02 | 0.73  | 2.34E-01 |
| GCOM1     | 1.54 | 6.17E-02 | -0.37 | 6.44E-01 | 2.05  | 2.04E-02 |
| CSNK1D    | 1.54 | 6.18E-02 | 1.05  | 1.47E-01 | 0.31  | 3.79E-01 |
| ROR2      | 1.54 | 6.19E-02 | -0.27 | 6.08E-01 | 1.93  | 2.67E-02 |
| INTS4     | 1.54 | 6.22E-02 | 0.08  | 4.67E-01 | 1.86  | 3.18E-02 |
| SIGLEC6   | 1.54 | 6.23E-02 | 1.80  | 3.58E-02 | -0.46 | 6.79E-01 |
| WDPCP     | 1.54 | 6.23E-02 | 1.48  | 6.97E-02 | -0.59 | 7.22E-01 |
| ZNF20     | 1.53 | 6.24E-02 | 0.68  | 2.47E-01 | 1.14  | 1.26E-01 |
| CAP2      | 1.53 | 6.24E-02 | 0.43  | 3.34E-01 | 0.96  | 1.70E-01 |
| FAM69B    | 1.53 | 6.25E-02 | 0.32  | 3.76E-01 | 1.57  | 5.80E-02 |
| ENTPD7    | 1.53 | 6.25E-02 | 1.42  | 7.74E-02 | -0.33 | 6.29E-01 |
| OR2A14    | 1.53 | 6.26E-02 | 0.49  | 3.13E-01 | 1.35  | 8.81E-02 |
| ADAR      | 1.53 | 6.27E-02 | 1.48  | 6.97E-02 | 0.73  | 2.32E-01 |
| PPIP5K2   | 1.53 | 6.27E-02 | 1.66  | 4.82E-02 | -0.34 | 6.33E-01 |
| ZDBF2     | 1.53 | 6.27E-02 | 1.48  | 6.91E-02 | -0.12 | 5.48E-01 |
| GNRH2     | 1.53 | 6.28E-02 | 0.89  | 1.86E-01 | 0.36  | 3.59E-01 |
| ADRA2C    | 1.53 | 6.28E-02 | 1.70  | 4.49E-02 | 1.67  | 4.77E-02 |
| STRA13    | 1.53 | 6.28E-02 | 2.94  | 1.63E-03 | 0.28  | 3.90E-01 |
| TMEM128   | 1.53 | 6.28E-02 | 0.67  | 2.51E-01 | 1.37  | 8.51E-02 |

|                 |      |          |       |          |       |          |
|-----------------|------|----------|-------|----------|-------|----------|
| ABCB11          | 1.53 | 6.29E-02 | 1.53  | 6.26E-02 | -0.93 | 8.23E-01 |
| NIPBL           | 1.53 | 6.29E-02 | 0.54  | 2.96E-01 | 1.65  | 4.98E-02 |
| XRCC3           | 1.53 | 6.29E-02 | 0.56  | 2.89E-01 | 1.26  | 1.04E-01 |
| CAMTA1          | 1.53 | 6.29E-02 | 0.26  | 3.97E-01 | 0.91  | 1.83E-01 |
| OR8J3           | 1.53 | 6.30E-02 | 1.25  | 1.05E-01 | 0.40  | 3.46E-01 |
| LRRC25          | 1.53 | 6.30E-02 | 0.25  | 4.03E-01 | 1.80  | 3.60E-02 |
| RP1L1           | 1.53 | 6.31E-02 | 1.89  | 2.97E-02 | 0.48  | 3.15E-01 |
| SPECC1L-ADORA2A | 1.53 | 6.31E-02 | 0.35  | 3.62E-01 | 1.14  | 1.27E-01 |
| OR4A15          | 1.53 | 6.31E-02 | 0.94  | 1.73E-01 | 0.93  | 1.76E-01 |
| PLA2G2C         | 1.53 | 6.32E-02 | 0.92  | 1.79E-01 | 0.32  | 3.76E-01 |
| PSMD9           | 1.53 | 6.34E-02 | 1.40  | 8.04E-02 | 0.07  | 4.71E-01 |
| STAMBP          | 1.53 | 6.34E-02 | 0.89  | 1.88E-01 | -0.01 | 5.04E-01 |
| FGFRL1          | 1.53 | 6.35E-02 | 0.37  | 3.56E-01 | 1.81  | 3.55E-02 |
| TMED8           | 1.53 | 6.35E-02 | -0.03 | 5.13E-01 | 0.74  | 2.30E-01 |
| C2CD2L          | 1.53 | 6.35E-02 | 2.31  | 1.04E-02 | -1.54 | 9.39E-01 |
| ETV3            | 1.53 | 6.35E-02 | 0.49  | 3.11E-01 | 0.94  | 1.74E-01 |
| MED13L          | 1.53 | 6.36E-02 | 0.73  | 2.33E-01 | 1.17  | 1.22E-01 |
| MAP2K4          | 1.53 | 6.36E-02 | 1.23  | 1.09E-01 | -0.25 | 6.01E-01 |
| CSF3            | 1.53 | 6.36E-02 | 0.81  | 2.10E-01 | 0.27  | 3.94E-01 |
| MRPS21          | 1.52 | 6.37E-02 | 0.49  | 3.13E-01 | 1.23  | 1.09E-01 |
| PRKCD           | 1.52 | 6.37E-02 | 0.14  | 4.43E-01 | 1.99  | 2.32E-02 |
| CDH22           | 1.52 | 6.37E-02 | 0.71  | 2.38E-01 | 0.02  | 4.94E-01 |
| BARX2           | 1.52 | 6.37E-02 | 1.18  | 1.19E-01 | 0.73  | 2.34E-01 |
| ZNF18           | 1.52 | 6.37E-02 | 1.47  | 7.08E-02 | -0.38 | 6.49E-01 |
| TACSTD2         | 1.52 | 6.38E-02 | 0.73  | 2.34E-01 | 0.62  | 2.69E-01 |
| DNAJB11         | 1.52 | 6.38E-02 | -0.16 | 5.62E-01 | 1.19  | 1.18E-01 |
| KLK12           | 1.52 | 6.38E-02 | 0.07  | 4.74E-01 | 1.52  | 6.44E-02 |
| DCTPP1          | 1.52 | 6.39E-02 | 1.05  | 1.48E-01 | 0.52  | 3.01E-01 |
| EFCC1           | 1.52 | 6.39E-02 | 1.12  | 1.31E-01 | 0.08  | 4.68E-01 |
| SF3B4           | 1.52 | 6.40E-02 | 1.12  | 1.32E-01 | 0.25  | 4.03E-01 |
| B3GAT1          | 1.52 | 6.40E-02 | 1.80  | 3.57E-02 | -0.61 | 7.28E-01 |

|          |      |          |       |          |       |          |
|----------|------|----------|-------|----------|-------|----------|
| PIH1D1   | 1.52 | 6.40E-02 | 0.51  | 3.04E-01 | 0.92  | 1.80E-01 |
| CYP20A1  | 1.52 | 6.42E-02 | 0.40  | 3.43E-01 | 0.87  | 1.92E-01 |
| INPP5B   | 1.52 | 6.42E-02 | 0.07  | 4.71E-01 | 2.03  | 2.14E-02 |
| AUTS2    | 1.52 | 6.42E-02 | 1.07  | 1.42E-01 | 0.61  | 2.70E-01 |
| DNTTIP1  | 1.52 | 6.44E-02 | 0.72  | 2.36E-01 | 0.96  | 1.69E-01 |
| TMCO3    | 1.52 | 6.44E-02 | -0.14 | 5.54E-01 | 1.41  | 7.93E-02 |
| HAVCR1   | 1.52 | 6.45E-02 | -0.19 | 5.75E-01 | 1.97  | 2.42E-02 |
| CCDC78   | 1.52 | 6.45E-02 | 1.59  | 5.65E-02 | -0.44 | 6.69E-01 |
| PHKG1    | 1.52 | 6.45E-02 | 1.80  | 3.57E-02 | 0.94  | 1.75E-01 |
| OR8K1    | 1.52 | 6.46E-02 | 1.22  | 1.12E-01 | 0.13  | 4.49E-01 |
| EDAR     | 1.52 | 6.46E-02 | 1.19  | 1.16E-01 | 0.15  | 4.39E-01 |
| WNK1     | 1.52 | 6.46E-02 | 0.40  | 3.44E-01 | 1.10  | 1.36E-01 |
| CDK10    | 1.52 | 6.46E-02 | 0.72  | 2.37E-01 | 0.87  | 1.92E-01 |
| SPIC     | 1.52 | 6.46E-02 | 0.60  | 2.75E-01 | 1.29  | 9.90E-02 |
| ADD1     | 1.52 | 6.47E-02 | 0.34  | 3.67E-01 | 0.77  | 2.21E-01 |
| EGR1     | 1.52 | 6.48E-02 | -0.16 | 5.64E-01 | 1.74  | 4.06E-02 |
| C21orf88 | 1.52 | 6.48E-02 | 1.17  | 1.22E-01 | 0.82  | 2.07E-01 |
| NFAM1    | 1.52 | 6.48E-02 | 1.02  | 1.54E-01 | 1.22  | 1.11E-01 |
| MRPL32   | 1.51 | 6.50E-02 | 1.58  | 5.65E-02 | 0.03  | 4.88E-01 |
| DIRC2    | 1.51 | 6.50E-02 | 1.54  | 6.14E-02 | 0.59  | 2.79E-01 |
| PERP     | 1.51 | 6.51E-02 | -0.31 | 6.23E-01 | 1.52  | 6.45E-02 |
| CEACAM3  | 1.51 | 6.51E-02 | 1.14  | 1.28E-01 | 0.18  | 4.28E-01 |
| MYZAP    | 1.51 | 6.51E-02 | -0.39 | 6.53E-01 | 2.06  | 1.97E-02 |
| DISP1    | 1.51 | 6.52E-02 | 0.83  | 2.02E-01 | 0.64  | 2.61E-01 |
| CCDC126  | 1.51 | 6.52E-02 | 1.29  | 9.91E-02 | 0.13  | 4.47E-01 |
| C22orf29 | 1.51 | 6.53E-02 | 1.74  | 4.13E-02 | -0.74 | 7.70E-01 |
| THAP4    | 1.51 | 6.53E-02 | 2.19  | 1.44E-02 | -0.45 | 6.75E-01 |
| RRM2B    | 1.51 | 6.55E-02 | 0.16  | 4.37E-01 | 1.27  | 1.01E-01 |
| TROVE2   | 1.51 | 6.55E-02 | -0.27 | 6.08E-01 | 2.44  | 7.35E-03 |
| RSPO1    | 1.51 | 6.55E-02 | 1.53  | 6.26E-02 | 1.70  | 4.48E-02 |
| MFSD5    | 1.51 | 6.56E-02 | 1.33  | 9.24E-02 | 0.22  | 4.12E-01 |



|              |      |          |       |          |       |          |
|--------------|------|----------|-------|----------|-------|----------|
| C6orf89      | 1.51 | 6.56E-02 | 0.52  | 3.01E-01 | 0.47  | 3.20E-01 |
| PIAS2        | 1.51 | 6.56E-02 | 1.10  | 1.35E-01 | -0.14 | 5.54E-01 |
| ZNF596       | 1.51 | 6.56E-02 | 1.01  | 1.57E-01 | 1.02  | 1.53E-01 |
| GPR155       | 1.51 | 6.57E-02 | 0.77  | 2.21E-01 | 0.25  | 4.01E-01 |
| PRMT1        | 1.51 | 6.57E-02 | 0.13  | 4.48E-01 | 1.01  | 1.57E-01 |
| TFAP2B       | 1.51 | 6.58E-02 | 1.52  | 6.46E-02 | 0.82  | 2.07E-01 |
| TERF2IP      | 1.51 | 6.59E-02 | 0.90  | 1.85E-01 | 1.14  | 1.28E-01 |
| SDS          | 1.51 | 6.59E-02 | 1.83  | 3.34E-02 | -0.35 | 6.36E-01 |
| RP11-247C2.2 | 1.51 | 6.60E-02 | 0.69  | 2.45E-01 | 1.26  | 1.03E-01 |
| TAS2R14      | 1.51 | 6.61E-02 | 1.41  | 7.93E-02 | 0.80  | 2.12E-01 |
| TOR3A        | 1.51 | 6.61E-02 | 0.20  | 4.22E-01 | 0.85  | 1.97E-01 |
| MCYP11       | 1.50 | 6.63E-02 | 0.75  | 2.26E-01 | 0.45  | 3.27E-01 |
| IFI35        | 1.50 | 6.63E-02 | 0.56  | 2.87E-01 | 0.91  | 1.81E-01 |
| PTPRQ        | 1.50 | 6.64E-02 | 1.28  | 1.01E-01 | 0.05  | 4.80E-01 |
| LSAMP        | 1.50 | 6.64E-02 | 1.92  | 2.75E-02 | 0.38  | 3.53E-01 |
| UPK1A        | 1.50 | 6.65E-02 | -0.08 | 5.32E-01 | 1.82  | 3.45E-02 |
| ETNPPL       | 1.50 | 6.65E-02 | -0.54 | 7.05E-01 | 1.67  | 4.76E-02 |
| MRPL11       | 1.50 | 6.66E-02 | 1.88  | 2.99E-02 | -1.38 | 9.16E-01 |
| CEP120       | 1.50 | 6.66E-02 | 1.73  | 4.16E-02 | -0.71 | 7.61E-01 |
| NXPH2        | 1.50 | 6.67E-02 | 1.53  | 6.28E-02 | 0.00  | 5.00E-01 |
| STX4         | 1.50 | 6.67E-02 | 2.04  | 2.05E-02 | -0.58 | 7.19E-01 |
| PHF21B       | 1.50 | 6.67E-02 | -0.71 | 7.62E-01 | 0.84  | 1.99E-01 |
| MAP3K7       | 1.50 | 6.68E-02 | 0.48  | 3.16E-01 | 0.60  | 2.74E-01 |
| GJA1         | 1.50 | 6.69E-02 | 0.85  | 1.98E-01 | 1.53  | 6.31E-02 |
| NRG3         | 1.50 | 6.69E-02 | 0.92  | 1.79E-01 | 3.12  | 9.15E-04 |
| TMEM42       | 1.50 | 6.71E-02 | 0.85  | 1.97E-01 | 0.58  | 2.80E-01 |
| ZNF213       | 1.50 | 6.71E-02 | -0.76 | 7.76E-01 | 1.95  | 2.58E-02 |
| CD200        | 1.50 | 6.72E-02 | 1.28  | 1.00E-01 | -0.25 | 5.99E-01 |
| NDC1         | 1.50 | 6.72E-02 | 0.97  | 1.65E-01 | 0.44  | 3.30E-01 |
| SLC16A11     | 1.50 | 6.72E-02 | 0.06  | 4.74E-01 | 1.53  | 6.30E-02 |
| EPHX2        | 1.50 | 6.72E-02 | 0.87  | 1.93E-01 | 0.40  | 3.43E-01 |

|            |      |          |       |          |       |          |
|------------|------|----------|-------|----------|-------|----------|
| HEPHL1     | 1.50 | 6.72E-02 | 2.22  | 1.33E-02 | -1.72 | 9.57E-01 |
| HOMER2     | 1.50 | 6.73E-02 | 0.99  | 1.62E-01 | 1.83  | 3.36E-02 |
| ROBO2      | 1.49 | 6.75E-02 | 0.96  | 1.68E-01 | -0.07 | 5.29E-01 |
| NCEH1      | 1.49 | 6.76E-02 | 2.12  | 1.68E-02 | -0.06 | 5.25E-01 |
| NCAN       | 1.49 | 6.76E-02 | 0.85  | 1.97E-01 | 0.87  | 1.91E-01 |
| IMMP2L     | 1.49 | 6.76E-02 | 1.77  | 3.85E-02 | 1.17  | 1.20E-01 |
| NANOS3     | 1.49 | 6.77E-02 | -0.19 | 5.75E-01 | 1.80  | 3.58E-02 |
| TRIM8      | 1.49 | 6.77E-02 | 0.93  | 1.75E-01 | 1.35  | 8.91E-02 |
| ZNF322     | 1.49 | 6.78E-02 | 1.56  | 5.99E-02 | 0.13  | 4.48E-01 |
| PREP       | 1.49 | 6.78E-02 | -1.32 | 9.07E-01 | 2.74  | 3.06E-03 |
| CNTF       | 1.49 | 6.78E-02 | -0.89 | 8.14E-01 | 3.06  | 1.09E-03 |
| TAF4       | 1.49 | 6.78E-02 | 2.25  | 1.23E-02 | -0.37 | 6.44E-01 |
| RPL39L     | 1.49 | 6.79E-02 | 0.74  | 2.29E-01 | 1.22  | 1.11E-01 |
| CLASP2     | 1.49 | 6.80E-02 | -1.01 | 8.44E-01 | 2.59  | 4.86E-03 |
| CASP6      | 1.49 | 6.80E-02 | 1.06  | 1.45E-01 | 0.20  | 4.20E-01 |
| FGFBP2     | 1.49 | 6.81E-02 | 0.50  | 3.08E-01 | 1.13  | 1.29E-01 |
| ZNF548     | 1.49 | 6.81E-02 | 1.37  | 8.49E-02 | -0.19 | 5.75E-01 |
| PITX1      | 1.49 | 6.81E-02 | 0.43  | 3.34E-01 | 1.26  | 1.03E-01 |
| LSMEM1     | 1.49 | 6.81E-02 | 1.59  | 5.60E-02 | -0.50 | 6.90E-01 |
| CDKN2AIPNL | 1.49 | 6.82E-02 | 0.57  | 2.86E-01 | 1.28  | 1.01E-01 |
| PENK       | 1.49 | 6.83E-02 | 1.96  | 2.51E-02 | 0.33  | 3.72E-01 |
| STK40      | 1.49 | 6.83E-02 | 0.25  | 4.03E-01 | 1.09  | 1.38E-01 |
| SPOCD1     | 1.49 | 6.83E-02 | 0.28  | 3.90E-01 | 1.28  | 9.97E-02 |
| ANKRD55    | 1.49 | 6.85E-02 | 1.57  | 5.78E-02 | -0.49 | 6.87E-01 |
| BTNL8      | 1.49 | 6.85E-02 | 0.35  | 3.64E-01 | 0.92  | 1.79E-01 |
| KAT6A      | 1.49 | 6.86E-02 | 0.36  | 3.60E-01 | 0.98  | 1.64E-01 |
| TULP4      | 1.49 | 6.86E-02 | 2.46  | 6.88E-03 | -0.76 | 7.75E-01 |
| PROSC      | 1.49 | 6.86E-02 | 0.05  | 4.79E-01 | 1.62  | 5.28E-02 |
| TESPA1     | 1.49 | 6.86E-02 | -0.64 | 7.38E-01 | 2.29  | 1.10E-02 |
| KLC4       | 1.48 | 6.88E-02 | 0.80  | 2.11E-01 | 0.83  | 2.02E-01 |
| RUFY4      | 1.48 | 6.88E-02 | 2.12  | 1.71E-02 | -0.87 | 8.08E-01 |

|         |      |          |       |          |       |          |
|---------|------|----------|-------|----------|-------|----------|
| ASRGL1  | 1.48 | 6.89E-02 | 0.67  | 2.53E-01 | 1.78  | 3.72E-02 |
| PI15    | 1.48 | 6.90E-02 | 1.31  | 9.48E-02 | 0.12  | 4.54E-01 |
| GPFR1   | 1.48 | 6.90E-02 | -0.52 | 6.97E-01 | 2.06  | 1.97E-02 |
| C5orf66 | 1.48 | 6.91E-02 | -0.06 | 5.24E-01 | 1.64  | 5.07E-02 |
| STUB1   | 1.48 | 6.91E-02 | 1.14  | 1.28E-01 | 0.82  | 2.06E-01 |
| SMIM3   | 1.48 | 6.92E-02 | 1.76  | 3.89E-02 | 0.37  | 3.57E-01 |
| LRRK2   | 1.48 | 6.92E-02 | 0.61  | 2.71E-01 | 0.27  | 3.94E-01 |
| DCHS1   | 1.48 | 6.93E-02 | 0.76  | 2.23E-01 | 0.41  | 3.40E-01 |
| OR4A16  | 1.48 | 6.93E-02 | 0.48  | 3.15E-01 | 1.95  | 2.53E-02 |
| CHURC1  | 1.48 | 6.94E-02 | -0.42 | 6.62E-01 | 1.42  | 7.85E-02 |
| HTR4    | 1.48 | 6.94E-02 | 0.64  | 2.62E-01 | 0.92  | 1.80E-01 |
| FRMD6   | 1.48 | 6.94E-02 | 0.29  | 3.88E-01 | 0.40  | 3.46E-01 |
| 43166   | 1.48 | 6.95E-02 | 1.23  | 1.09E-01 | 0.18  | 4.28E-01 |
| RAPH1   | 1.48 | 6.95E-02 | 0.53  | 2.99E-01 | 0.54  | 2.95E-01 |
| LCE1F   | 1.48 | 6.95E-02 | -0.09 | 5.34E-01 | 1.31  | 9.48E-02 |
| SLC13A2 | 1.48 | 6.96E-02 | -0.48 | 6.84E-01 | 1.45  | 7.37E-02 |
| PRSS3   | 1.48 | 6.96E-02 | 0.70  | 2.42E-01 | -0.08 | 5.31E-01 |
| NT5DC2  | 1.48 | 6.97E-02 | 1.01  | 1.57E-01 | 0.40  | 3.43E-01 |
| UQCRFS1 | 1.48 | 6.97E-02 | 1.95  | 2.59E-02 | 0.58  | 2.80E-01 |
| ARIH1   | 1.48 | 6.97E-02 | 1.05  | 1.47E-01 | 0.52  | 3.01E-01 |
| DNASE2  | 1.48 | 6.97E-02 | 0.90  | 1.85E-01 | 0.16  | 4.37E-01 |
| KIFC3   | 1.48 | 6.97E-02 | 0.90  | 1.83E-01 | -0.78 | 7.82E-01 |
| ZNF135  | 1.48 | 6.98E-02 | 0.26  | 3.99E-01 | 0.86  | 1.96E-01 |
| TFCP2   | 1.48 | 6.98E-02 | 2.02  | 2.16E-02 | 0.56  | 2.89E-01 |
| BMP3    | 1.48 | 6.99E-02 | 0.34  | 3.68E-01 | 0.97  | 1.65E-01 |
| EDEM3   | 1.48 | 6.99E-02 | 0.28  | 3.90E-01 | 0.75  | 2.25E-01 |
| RNF4    | 1.48 | 7.00E-02 | -0.24 | 5.95E-01 | 1.11  | 1.34E-01 |
| OR4C16  | 1.48 | 7.00E-02 | 1.27  | 1.02E-01 | 0.83  | 2.02E-01 |
| GLI1    | 1.48 | 7.00E-02 | 0.72  | 2.34E-01 | 0.53  | 2.97E-01 |
| CDHR2   | 1.48 | 7.01E-02 | 1.04  | 1.48E-01 | 0.26  | 3.99E-01 |
| PSMA2   | 1.47 | 7.02E-02 | 1.14  | 1.27E-01 | 0.39  | 3.50E-01 |

|          |      |          |       |          |       |          |
|----------|------|----------|-------|----------|-------|----------|
| FAM175A  | 1.47 | 7.04E-02 | 0.12  | 4.54E-01 | 1.47  | 7.11E-02 |
| SF3A3    | 1.47 | 7.04E-02 | 0.90  | 1.85E-01 | 1.19  | 1.18E-01 |
| SLFN13   | 1.47 | 7.05E-02 | 1.25  | 1.06E-01 | -0.12 | 5.49E-01 |
| ZNF471   | 1.47 | 7.05E-02 | 0.31  | 3.77E-01 | 0.54  | 2.96E-01 |
| UBD      | 1.47 | 7.05E-02 | 0.55  | 2.92E-01 | 0.82  | 2.06E-01 |
| WFDC10B  | 1.47 | 7.06E-02 | 0.81  | 2.09E-01 | 0.31  | 3.79E-01 |
| WFDC6    | 1.47 | 7.07E-02 | 0.35  | 3.63E-01 | 0.62  | 2.68E-01 |
| AGAP1    | 1.47 | 7.08E-02 | 0.19  | 4.23E-01 | 3.67  | 1.23E-04 |
| MYBPHL   | 1.47 | 7.08E-02 | -1.12 | 8.69E-01 | 3.07  | 1.07E-03 |
| OAT      | 1.47 | 7.08E-02 | 0.39  | 3.49E-01 | 1.53  | 6.24E-02 |
| SS18L2   | 1.47 | 7.08E-02 | 0.75  | 2.28E-01 | 0.33  | 3.71E-01 |
| ACTG2    | 1.47 | 7.08E-02 | 1.20  | 1.14E-01 | -0.06 | 5.24E-01 |
| ODF2     | 1.47 | 7.08E-02 | 0.78  | 2.18E-01 | 0.60  | 2.73E-01 |
| UCHL5    | 1.47 | 7.09E-02 | -0.36 | 6.42E-01 | 2.31  | 1.05E-02 |
| TRMT2A   | 1.47 | 7.10E-02 | 0.43  | 3.35E-01 | 1.93  | 2.68E-02 |
| PRODH2   | 1.47 | 7.12E-02 | -0.04 | 5.16E-01 | 1.04  | 1.49E-01 |
| NKD2     | 1.47 | 7.12E-02 | -0.49 | 6.89E-01 | 3.12  | 8.97E-04 |
| TRIM48   | 1.47 | 7.12E-02 | 1.44  | 7.56E-02 | -0.24 | 5.93E-01 |
| MPC1     | 1.47 | 7.14E-02 | 0.90  | 1.83E-01 | 0.93  | 1.76E-01 |
| TMEM161B | 1.47 | 7.14E-02 | 0.41  | 3.39E-01 | 0.56  | 2.89E-01 |
| TIGIT    | 1.47 | 7.14E-02 | 1.12  | 1.31E-01 | 0.75  | 2.27E-01 |
| NT5C1A   | 1.47 | 7.15E-02 | 1.86  | 3.17E-02 | 0.80  | 2.11E-01 |
| NAA60    | 1.46 | 7.15E-02 | 1.02  | 1.53E-01 | 1.23  | 1.09E-01 |
| RBM7     | 1.46 | 7.15E-02 | 0.41  | 3.40E-01 | 0.33  | 3.70E-01 |
| PMPCA    | 1.46 | 7.16E-02 | 0.50  | 3.08E-01 | 0.30  | 3.83E-01 |
| PNMA1    | 1.46 | 7.18E-02 | 1.88  | 3.00E-02 | 0.93  | 1.77E-01 |
| PAX4     | 1.46 | 7.18E-02 | 1.07  | 1.43E-01 | 0.25  | 4.02E-01 |
| ANKRD6   | 1.46 | 7.18E-02 | 0.27  | 3.95E-01 | 0.86  | 1.95E-01 |
| SEC24B   | 1.46 | 7.18E-02 | 0.97  | 1.65E-01 | 0.26  | 3.98E-01 |
| MRPL44   | 1.46 | 7.20E-02 | 1.00  | 1.58E-01 | 0.65  | 2.59E-01 |
| CARD9    | 1.46 | 7.21E-02 | 1.25  | 1.05E-01 | -0.56 | 7.12E-01 |

|          |      |          |       |          |       |          |
|----------|------|----------|-------|----------|-------|----------|
| ORC1     | 1.46 | 7.21E-02 | 0.95  | 1.70E-01 | 0.98  | 1.63E-01 |
| ALS2     | 1.46 | 7.22E-02 | 0.82  | 2.07E-01 | -0.05 | 5.19E-01 |
| HMHA1    | 1.46 | 7.23E-02 | 0.17  | 4.32E-01 | 0.55  | 2.91E-01 |
| SDSL     | 1.46 | 7.23E-02 | 1.88  | 2.99E-02 | -0.51 | 6.96E-01 |
| PYGM     | 1.46 | 7.23E-02 | 0.09  | 4.66E-01 | 1.57  | 5.85E-02 |
| PSMA2    | 1.46 | 7.24E-02 | 1.32  | 9.40E-02 | 0.33  | 3.70E-01 |
| VSTM4    | 1.46 | 7.24E-02 | -0.11 | 5.42E-01 | 1.02  | 1.55E-01 |
| C17orf78 | 1.46 | 7.25E-02 | 1.70  | 4.42E-02 | -0.47 | 6.82E-01 |
| HP1BP3   | 1.45 | 7.30E-02 | 0.52  | 3.03E-01 | 0.90  | 1.83E-01 |
| FANCL    | 1.45 | 7.30E-02 | -0.50 | 6.90E-01 | 1.44  | 7.46E-02 |
| CCR6     | 1.45 | 7.30E-02 | 0.48  | 3.15E-01 | 3.33  | 4.37E-04 |
| FOXJ3    | 1.45 | 7.31E-02 | -0.14 | 5.57E-01 | 1.53  | 6.27E-02 |
| SULT2B1  | 1.45 | 7.31E-02 | 1.34  | 9.04E-02 | 1.01  | 1.57E-01 |
| CD3E     | 1.45 | 7.32E-02 | -0.24 | 5.94E-01 | 1.92  | 2.76E-02 |
| ABCC10   | 1.45 | 7.32E-02 | 1.78  | 3.73E-02 | 0.43  | 3.33E-01 |
| CCL8     | 1.45 | 7.32E-02 | -0.46 | 6.79E-01 | 1.98  | 2.40E-02 |
| INSL5    | 1.45 | 7.32E-02 | 0.63  | 2.66E-01 | 0.72  | 2.36E-01 |
| PTPLB    | 1.45 | 7.32E-02 | 1.40  | 8.09E-02 | -0.21 | 5.81E-01 |
| ZNF829   | 1.45 | 7.32E-02 | 0.41  | 3.42E-01 | 0.93  | 1.76E-01 |
| SLC22A1  | 1.45 | 7.33E-02 | 2.48  | 6.54E-03 | 0.56  | 2.89E-01 |
| MTRNR2L7 | 1.45 | 7.33E-02 | 0.90  | 1.85E-01 | 0.26  | 3.96E-01 |
| TRAPPC11 | 1.45 | 7.33E-02 | 1.63  | 5.15E-02 | -0.49 | 6.87E-01 |
| MAP1LC3C | 1.45 | 7.33E-02 | 1.20  | 1.14E-01 | 0.61  | 2.70E-01 |
| ZNF668   | 1.45 | 7.34E-02 | 1.40  | 8.11E-02 | 0.17  | 4.32E-01 |
| ELTD1    | 1.45 | 7.34E-02 | 1.55  | 6.06E-02 | 1.62  | 5.26E-02 |
| HBE1     | 1.45 | 7.35E-02 | 1.05  | 1.47E-01 | -0.31 | 6.23E-01 |
| EMR3     | 1.45 | 7.35E-02 | -0.15 | 5.61E-01 | 1.95  | 2.54E-02 |
| CCDC135  | 1.45 | 7.36E-02 | 0.71  | 2.40E-01 | 0.27  | 3.95E-01 |
| SMU1     | 1.45 | 7.36E-02 | 1.26  | 1.04E-01 | -0.38 | 6.47E-01 |
| ABCA9    | 1.45 | 7.38E-02 | 1.73  | 4.19E-02 | -1.27 | 8.98E-01 |
| ZNF844   | 1.45 | 7.38E-02 | 0.95  | 1.70E-01 | 0.44  | 3.31E-01 |

|              |      |          |       |          |       |          |
|--------------|------|----------|-------|----------|-------|----------|
| DSCR3        | 1.45 | 7.38E-02 | 1.14  | 1.27E-01 | 1.01  | 1.55E-01 |
| REXO4        | 1.45 | 7.38E-02 | 0.08  | 4.68E-01 | 1.19  | 1.17E-01 |
| AQR          | 1.45 | 7.38E-02 | 2.52  | 5.94E-03 | -1.00 | 8.42E-01 |
| ALCAM        | 1.45 | 7.38E-02 | -0.20 | 5.79E-01 | 2.07  | 1.93E-02 |
| DPP9         | 1.45 | 7.39E-02 | 1.65  | 4.92E-02 | -0.51 | 6.96E-01 |
| OR2J1        | 1.45 | 7.39E-02 | 1.71  | 4.38E-02 | 0.43  | 3.35E-01 |
| ZC3H14       | 1.45 | 7.39E-02 | 0.60  | 2.74E-01 | 1.38  | 8.41E-02 |
| ZMYM4        | 1.45 | 7.40E-02 | 0.39  | 3.49E-01 | 0.65  | 2.58E-01 |
| RFPL3S       | 1.45 | 7.41E-02 | 0.85  | 1.97E-01 | 0.59  | 2.78E-01 |
| LCN6         | 1.45 | 7.42E-02 | 0.51  | 3.07E-01 | 0.96  | 1.69E-01 |
| AMIGO1       | 1.44 | 7.42E-02 | 0.34  | 3.67E-01 | 2.17  | 1.50E-02 |
| COL6A5       | 1.44 | 7.43E-02 | -0.41 | 6.60E-01 | 1.41  | 7.94E-02 |
| MAP4K2       | 1.44 | 7.43E-02 | 0.63  | 2.65E-01 | 0.97  | 1.65E-01 |
| RNF11        | 1.44 | 7.44E-02 | 1.03  | 1.53E-01 | 0.38  | 3.53E-01 |
| TRMT1L       | 1.44 | 7.44E-02 | -0.12 | 5.48E-01 | 1.61  | 5.36E-02 |
| KLRG2        | 1.44 | 7.45E-02 | 1.33  | 9.25E-02 | 1.18  | 1.19E-01 |
| COG4         | 1.44 | 7.47E-02 | 2.48  | 6.52E-03 | -0.59 | 7.23E-01 |
| FAM178B      | 1.44 | 7.47E-02 | 1.05  | 1.47E-01 | 0.27  | 3.94E-01 |
| IGFN1        | 1.44 | 7.47E-02 | 0.62  | 2.69E-01 | 0.53  | 2.99E-01 |
| SLC50A1      | 1.44 | 7.47E-02 | 0.74  | 2.30E-01 | 0.14  | 4.43E-01 |
| SPECC1L      | 1.44 | 7.48E-02 | 0.37  | 3.54E-01 | 1.01  | 1.57E-01 |
| PRSS21       | 1.44 | 7.48E-02 | 0.92  | 1.78E-01 | 0.25  | 4.01E-01 |
| COX15        | 1.44 | 7.49E-02 | 1.20  | 1.15E-01 | -0.48 | 6.84E-01 |
| CH25H        | 1.44 | 7.49E-02 | 1.10  | 1.35E-01 | 0.02  | 4.90E-01 |
| GLRX2        | 1.44 | 7.49E-02 | -0.05 | 5.19E-01 | 2.34  | 9.58E-03 |
| MRPS17       | 1.44 | 7.50E-02 | 2.13  | 1.67E-02 | -0.43 | 6.68E-01 |
| RAB1B        | 1.44 | 7.51E-02 | 1.28  | 1.01E-01 | 0.09  | 4.63E-01 |
| COG2         | 1.44 | 7.52E-02 | 0.82  | 2.07E-01 | 0.47  | 3.18E-01 |
| RP11-758M4.1 | 1.44 | 7.52E-02 | 1.77  | 3.86E-02 | 0.19  | 4.24E-01 |
| SOCS5        | 1.44 | 7.52E-02 | 0.47  | 3.18E-01 | 1.38  | 8.38E-02 |
| DICER1       | 1.44 | 7.53E-02 | 1.96  | 2.51E-02 | -0.81 | 7.91E-01 |

|               |      |          |       |          |       |          |
|---------------|------|----------|-------|----------|-------|----------|
| BRSK2         | 1.44 | 7.53E-02 | 0.91  | 1.81E-01 | 1.17  | 1.21E-01 |
| ANO3          | 1.44 | 7.53E-02 | 0.53  | 2.98E-01 | 0.12  | 4.52E-01 |
| EXTL2         | 1.44 | 7.55E-02 | 1.20  | 1.16E-01 | -0.48 | 6.85E-01 |
| DBNL          | 1.44 | 7.55E-02 | 1.37  | 8.55E-02 | -0.34 | 6.32E-01 |
| PCBP1         | 1.44 | 7.56E-02 | 1.65  | 4.92E-02 | -0.20 | 5.79E-01 |
| LINC01101     | 1.44 | 7.56E-02 | 0.95  | 1.70E-01 | 0.47  | 3.21E-01 |
| KPRP          | 1.44 | 7.56E-02 | -0.17 | 5.66E-01 | 1.46  | 7.21E-02 |
| RAB15         | 1.44 | 7.56E-02 | -0.14 | 5.56E-01 | 1.25  | 1.05E-01 |
| C1orf111      | 1.44 | 7.56E-02 | 0.00  | 5.01E-01 | 1.02  | 1.54E-01 |
| TRH           | 1.44 | 7.57E-02 | -0.19 | 5.77E-01 | 1.31  | 9.46E-02 |
| C15orf59      | 1.43 | 7.57E-02 | 0.40  | 3.43E-01 | 0.62  | 2.68E-01 |
| BBS5          | 1.43 | 7.58E-02 | 0.07  | 4.73E-01 | 0.70  | 2.41E-01 |
| SLC39A12      | 1.43 | 7.59E-02 | 0.03  | 4.89E-01 | 0.75  | 2.26E-01 |
| RETNLB        | 1.43 | 7.59E-02 | 0.54  | 2.95E-01 | 1.03  | 1.50E-01 |
| ZNF787        | 1.43 | 7.61E-02 | 1.77  | 3.87E-02 | -1.30 | 9.04E-01 |
| METTL4        | 1.43 | 7.63E-02 | -0.04 | 5.14E-01 | 1.11  | 1.33E-01 |
| PITPNM2       | 1.43 | 7.63E-02 | 0.48  | 3.14E-01 | 0.88  | 1.91E-01 |
| STRAP         | 1.43 | 7.63E-02 | -1.07 | 8.57E-01 | 2.00  | 2.29E-02 |
| MYO18A        | 1.43 | 7.63E-02 | -0.51 | 6.94E-01 | 2.37  | 8.87E-03 |
| TRAF3IP2      | 1.43 | 7.63E-02 | 0.79  | 2.15E-01 | 0.08  | 4.68E-01 |
| TBC1D14       | 1.43 | 7.64E-02 | 1.31  | 9.44E-02 | -0.84 | 8.00E-01 |
| ZNF623        | 1.43 | 7.64E-02 | 1.34  | 8.97E-02 | -0.51 | 6.95E-01 |
| ADAM28        | 1.43 | 7.65E-02 | 1.24  | 1.08E-01 | -0.14 | 5.55E-01 |
| DNM1          | 1.43 | 7.65E-02 | 1.73  | 4.14E-02 | 0.64  | 2.60E-01 |
| OPALIN        | 1.43 | 7.66E-02 | 1.08  | 1.40E-01 | 0.08  | 4.68E-01 |
| RP11-382J12.1 | 1.43 | 7.67E-02 | 2.43  | 7.65E-03 | -1.13 | 8.71E-01 |
| FAM167A       | 1.43 | 7.67E-02 | 0.70  | 2.41E-01 | 0.62  | 2.67E-01 |
| MYO18B        | 1.43 | 7.67E-02 | 1.24  | 1.08E-01 | -0.55 | 7.08E-01 |
| MAPKAPK2      | 1.43 | 7.68E-02 | 2.23  | 1.28E-02 | -1.38 | 9.16E-01 |
| ENHO          | 1.43 | 7.68E-02 | -0.26 | 6.04E-01 | 1.86  | 3.14E-02 |
| TMEM177       | 1.43 | 7.68E-02 | -0.42 | 6.62E-01 | 1.70  | 4.43E-02 |

|           |      |          |       |          |       |          |
|-----------|------|----------|-------|----------|-------|----------|
| DBF4B     | 1.43 | 7.70E-02 | 1.80  | 3.59E-02 | 0.60  | 2.75E-01 |
| MAFB      | 1.43 | 7.70E-02 | 1.00  | 1.58E-01 | 0.79  | 2.15E-01 |
| C11orf35  | 1.43 | 7.70E-02 | -0.11 | 5.43E-01 | 2.40  | 8.26E-03 |
| KLK15     | 1.43 | 7.71E-02 | -0.28 | 6.10E-01 | 1.94  | 2.59E-02 |
| ACADL     | 1.42 | 7.71E-02 | 1.91  | 2.82E-02 | -0.83 | 7.96E-01 |
| CAST      | 1.42 | 7.73E-02 | 0.97  | 1.67E-01 | 1.14  | 1.28E-01 |
| APOC2     | 1.42 | 7.73E-02 | 0.01  | 4.96E-01 | 1.12  | 1.32E-01 |
| PKMYT1    | 1.42 | 7.73E-02 | 0.68  | 2.49E-01 | 1.13  | 1.30E-01 |
| CLEC11A   | 1.42 | 7.74E-02 | -0.71 | 7.60E-01 | 2.07  | 1.91E-02 |
| RAB5B     | 1.42 | 7.74E-02 | 1.46  | 7.28E-02 | 1.90  | 2.84E-02 |
| CCDC130   | 1.42 | 7.74E-02 | 2.25  | 1.22E-02 | -0.83 | 7.96E-01 |
| PBK       | 1.42 | 7.74E-02 | 1.96  | 2.48E-02 | -1.50 | 9.33E-01 |
| NSMCE4A   | 1.42 | 7.75E-02 | 0.10  | 4.61E-01 | 2.09  | 1.84E-02 |
| PEBP4     | 1.42 | 7.75E-02 | 0.65  | 2.59E-01 | 0.70  | 2.41E-01 |
| C10orf53  | 1.42 | 7.76E-02 | 1.05  | 1.47E-01 | 0.05  | 4.82E-01 |
| BTBD19    | 1.42 | 7.76E-02 | 2.36  | 9.06E-03 | -1.07 | 8.59E-01 |
| TIPRL     | 1.42 | 7.77E-02 | 0.98  | 1.63E-01 | 0.39  | 3.47E-01 |
| SRI       | 1.42 | 7.77E-02 | 0.98  | 1.64E-01 | 0.16  | 4.38E-01 |
| PLBD2     | 1.42 | 7.77E-02 | 1.98  | 2.40E-02 | -0.69 | 7.55E-01 |
| SPG11     | 1.42 | 7.78E-02 | 0.35  | 3.64E-01 | 0.54  | 2.96E-01 |
| GNGT2     | 1.42 | 7.78E-02 | -1.54 | 9.38E-01 | 2.67  | 3.81E-03 |
| PCP4      | 1.42 | 7.80E-02 | 0.58  | 2.83E-01 | 1.32  | 9.35E-02 |
| CPA6      | 1.42 | 7.80E-02 | -0.35 | 6.37E-01 | 1.90  | 2.85E-02 |
| MEX3D     | 1.42 | 7.81E-02 | 0.95  | 1.70E-01 | 0.67  | 2.52E-01 |
| RPH3AL    | 1.42 | 7.81E-02 | 1.62  | 5.29E-02 | -0.45 | 6.74E-01 |
| SECISBP2L | 1.42 | 7.81E-02 | -0.34 | 6.35E-01 | 1.79  | 3.65E-02 |
| SLC30A5   | 1.42 | 7.83E-02 | 1.25  | 1.05E-01 | 0.07  | 4.72E-01 |
| EXTL3     | 1.42 | 7.83E-02 | -0.70 | 7.59E-01 | 1.67  | 4.75E-02 |
| KCNJ3     | 1.42 | 7.84E-02 | 1.88  | 3.02E-02 | -0.60 | 7.26E-01 |
| GABRB3    | 1.42 | 7.84E-02 | 2.75  | 2.98E-03 | -0.66 | 7.46E-01 |
| FURIN     | 1.42 | 7.84E-02 | 1.46  | 7.25E-02 | 0.09  | 4.64E-01 |



|          |      |          |       |          |       |          |
|----------|------|----------|-------|----------|-------|----------|
| CIR1     | 1.42 | 7.84E-02 | 0.89  | 1.88E-01 | -0.02 | 5.06E-01 |
| ZBTB20   | 1.42 | 7.85E-02 | 1.48  | 6.93E-02 | 1.04  | 1.48E-01 |
| TADA1    | 1.42 | 7.85E-02 | 0.91  | 1.82E-01 | 0.39  | 3.47E-01 |
| SOCS4    | 1.41 | 7.86E-02 | 0.01  | 4.97E-01 | 1.88  | 3.03E-02 |
| MRPS23   | 1.41 | 7.86E-02 | 1.36  | 8.77E-02 | 0.00  | 5.02E-01 |
| LBR      | 1.41 | 7.87E-02 | 0.42  | 3.38E-01 | 0.64  | 2.61E-01 |
| SMIM7    | 1.41 | 7.87E-02 | 0.24  | 4.04E-01 | 0.64  | 2.60E-01 |
| SCAF8    | 1.41 | 7.88E-02 | 0.32  | 3.76E-01 | 1.99  | 2.32E-02 |
| KCNA6    | 1.41 | 7.88E-02 | 1.00  | 1.59E-01 | 0.32  | 3.73E-01 |
| ATG13    | 1.41 | 7.89E-02 | -0.18 | 5.71E-01 | 1.83  | 3.38E-02 |
| C14orf80 | 1.41 | 7.89E-02 | 1.66  | 4.88E-02 | 0.05  | 4.79E-01 |
| OSBPL7   | 1.41 | 7.89E-02 | 0.23  | 4.08E-01 | 1.04  | 1.48E-01 |
| LCE1E    | 1.41 | 7.89E-02 | 0.72  | 2.37E-01 | 0.80  | 2.13E-01 |
| OR6N2    | 1.41 | 7.90E-02 | -0.11 | 5.44E-01 | 1.51  | 6.54E-02 |
| ZNF575   | 1.41 | 7.90E-02 | 1.41  | 8.00E-02 | 0.27  | 3.95E-01 |
| GATA2    | 1.41 | 7.92E-02 | 1.05  | 1.48E-01 | 1.19  | 1.16E-01 |
| PSMB11   | 1.41 | 7.93E-02 | 0.09  | 4.64E-01 | 1.08  | 1.40E-01 |
| MICU3    | 1.41 | 7.93E-02 | 1.53  | 6.28E-02 | 0.61  | 2.72E-01 |
| OR5B17   | 1.41 | 7.94E-02 | 1.38  | 8.44E-02 | 0.23  | 4.11E-01 |
| C12orf73 | 1.41 | 7.95E-02 | 0.34  | 3.68E-01 | 0.66  | 2.54E-01 |
| BLOC1S3  | 1.41 | 7.95E-02 | -0.58 | 7.20E-01 | 1.90  | 2.87E-02 |
| PPP6R2   | 1.41 | 7.95E-02 | 0.54  | 2.95E-01 | 0.67  | 2.51E-01 |
| FAM49A   | 1.41 | 7.95E-02 | 1.25  | 1.06E-01 | 1.49  | 6.76E-02 |
| ZFYVE16  | 1.41 | 7.95E-02 | 0.52  | 3.02E-01 | 0.59  | 2.79E-01 |
| ABCG4    | 1.41 | 7.96E-02 | 1.86  | 3.16E-02 | -0.66 | 7.47E-01 |
| GDF9     | 1.41 | 7.96E-02 | 1.21  | 1.12E-01 | 0.00  | 4.99E-01 |
| TIGD7    | 1.41 | 7.97E-02 | 1.01  | 1.57E-01 | 0.11  | 4.55E-01 |
| CA13     | 1.41 | 7.97E-02 | 0.02  | 4.94E-01 | 1.23  | 1.09E-01 |
| NRG2     | 1.41 | 7.97E-02 | 0.45  | 3.25E-01 | 0.40  | 3.46E-01 |
| TRAPPC9  | 1.41 | 7.97E-02 | 1.71  | 4.40E-02 | -1.01 | 8.44E-01 |
| LNPEP    | 1.41 | 7.99E-02 | 0.30  | 3.83E-01 | 1.08  | 1.39E-01 |

|          |      |          |       |          |       |          |
|----------|------|----------|-------|----------|-------|----------|
| SLK      | 1.41 | 7.99E-02 | 1.18  | 1.19E-01 | 0.08  | 4.68E-01 |
| C1orf162 | 1.40 | 8.00E-02 | 0.15  | 4.40E-01 | 1.03  | 1.51E-01 |
| DAGLA    | 1.40 | 8.01E-02 | 1.32  | 9.32E-02 | -0.96 | 8.31E-01 |
| KDM4C    | 1.40 | 8.01E-02 | 1.33  | 9.11E-02 | 0.89  | 1.87E-01 |
| UBXN1    | 1.40 | 8.02E-02 | 1.89  | 2.91E-02 | -1.48 | 9.30E-01 |
| PRUNE2   | 1.40 | 8.02E-02 | 0.44  | 3.29E-01 | 2.39  | 8.34E-03 |
| NARG2    | 1.40 | 8.02E-02 | 1.78  | 3.78E-02 | -0.80 | 7.87E-01 |
| KIAA1919 | 1.40 | 8.02E-02 | 1.20  | 1.15E-01 | 0.35  | 3.65E-01 |
| ATP5L    | 1.40 | 8.03E-02 | 0.89  | 1.86E-01 | 0.14  | 4.46E-01 |
| FES      | 1.40 | 8.03E-02 | 1.01  | 1.57E-01 | -0.14 | 5.56E-01 |
| HSD11B1L | 1.40 | 8.03E-02 | 0.26  | 3.99E-01 | 1.61  | 5.41E-02 |
| RNASEH2C | 1.40 | 8.03E-02 | 1.31  | 9.54E-02 | -0.60 | 7.24E-01 |
| EFEMP2   | 1.40 | 8.03E-02 | 1.38  | 8.37E-02 | -0.25 | 6.00E-01 |
| ZBTB4    | 1.40 | 8.04E-02 | 0.19  | 4.24E-01 | 0.66  | 2.56E-01 |
| NUBPL    | 1.40 | 8.05E-02 | 0.18  | 4.30E-01 | 2.41  | 7.99E-03 |
| ZNF184   | 1.40 | 8.05E-02 | 1.67  | 4.72E-02 | 1.01  | 1.57E-01 |
| LINS     | 1.40 | 8.05E-02 | 0.23  | 4.09E-01 | 0.53  | 2.98E-01 |
| OR1M1    | 1.40 | 8.06E-02 | 0.16  | 4.38E-01 | 0.95  | 1.70E-01 |
| NKAIN1   | 1.40 | 8.06E-02 | 1.01  | 1.56E-01 | 0.21  | 4.17E-01 |
| JAG2     | 1.40 | 8.06E-02 | -0.23 | 5.92E-01 | 1.57  | 5.81E-02 |
| BTN3A1   | 1.40 | 8.07E-02 | 1.02  | 1.53E-01 | 0.30  | 3.81E-01 |
| C3orf62  | 1.40 | 8.07E-02 | -0.71 | 7.61E-01 | 2.58  | 4.91E-03 |
| TRAPPC6A | 1.40 | 8.07E-02 | -0.41 | 6.59E-01 | 1.92  | 2.75E-02 |
| PAH      | 1.40 | 8.07E-02 | 1.13  | 1.29E-01 | 1.94  | 2.60E-02 |
| PHF21A   | 1.40 | 8.08E-02 | 1.73  | 4.22E-02 | 1.57  | 5.78E-02 |
| HIAT1    | 1.40 | 8.09E-02 | 1.32  | 9.38E-02 | -0.86 | 8.04E-01 |
| EFTUD2   | 1.40 | 8.09E-02 | 2.16  | 1.53E-02 | -0.01 | 5.05E-01 |
| CCDC102A | 1.40 | 8.09E-02 | -0.08 | 5.33E-01 | 1.36  | 8.67E-02 |
| SLC25A12 | 1.40 | 8.10E-02 | 1.28  | 1.00E-01 | -0.26 | 6.01E-01 |
| C21orf62 | 1.40 | 8.11E-02 | 0.42  | 3.38E-01 | 0.78  | 2.18E-01 |
| JAK1     | 1.40 | 8.11E-02 | -0.17 | 5.69E-01 | 1.53  | 6.27E-02 |

|          |      |          |       |          |       |          |
|----------|------|----------|-------|----------|-------|----------|
| IGFBP2   | 1.40 | 8.12E-02 | 1.83  | 3.35E-02 | -0.95 | 8.29E-01 |
| FAM184B  | 1.40 | 8.12E-02 | 0.97  | 1.66E-01 | 0.14  | 4.44E-01 |
| STK33    | 1.40 | 8.12E-02 | 1.41  | 7.98E-02 | -0.96 | 8.32E-01 |
| ENDOD1   | 1.40 | 8.13E-02 | 1.56  | 5.89E-02 | -0.52 | 6.97E-01 |
| CC2D2A   | 1.40 | 8.13E-02 | 1.87  | 3.10E-02 | -0.94 | 8.25E-01 |
| LRRC32   | 1.40 | 8.13E-02 | -1.45 | 9.26E-01 | 3.06  | 1.10E-03 |
| TRUB2    | 1.40 | 8.13E-02 | 1.57  | 5.84E-02 | 0.59  | 2.78E-01 |
| PIIP5K1  | 1.40 | 8.13E-02 | 1.71  | 4.33E-02 | 0.05  | 4.80E-01 |
| MOSPD3   | 1.40 | 8.13E-02 | 0.91  | 1.82E-01 | 0.69  | 2.45E-01 |
| GLE1     | 1.40 | 8.14E-02 | 0.77  | 2.22E-01 | 0.64  | 2.62E-01 |
| HSP90B1  | 1.40 | 8.15E-02 | 0.07  | 4.74E-01 | 0.44  | 3.30E-01 |
| CD47     | 1.40 | 8.15E-02 | 0.87  | 1.93E-01 | -0.30 | 6.19E-01 |
| MCHR2    | 1.40 | 8.15E-02 | 0.77  | 2.20E-01 | 0.53  | 2.99E-01 |
| SPINK5   | 1.39 | 8.15E-02 | 0.45  | 3.27E-01 | 1.16  | 1.24E-01 |
| ENTPD1   | 1.39 | 8.16E-02 | -0.46 | 6.76E-01 | 2.33  | 9.93E-03 |
| CCRL2    | 1.39 | 8.16E-02 | 1.33  | 9.22E-02 | 0.91  | 1.82E-01 |
| SLC35F2  | 1.39 | 8.17E-02 | 1.75  | 4.01E-02 | -0.05 | 5.19E-01 |
| LYRM2    | 1.39 | 8.17E-02 | -0.06 | 5.25E-01 | 0.91  | 1.81E-01 |
| LIPF     | 1.39 | 8.17E-02 | 0.39  | 3.49E-01 | 1.06  | 1.45E-01 |
| SLC17A1  | 1.39 | 8.18E-02 | 1.20  | 1.16E-01 | -0.52 | 6.99E-01 |
| C3orf30  | 1.39 | 8.19E-02 | 0.57  | 2.84E-01 | 1.09  | 1.38E-01 |
| TCAP     | 1.39 | 8.20E-02 | 0.66  | 2.54E-01 | 1.24  | 1.08E-01 |
| SH2D4B   | 1.39 | 8.20E-02 | 0.25  | 4.00E-01 | 0.09  | 4.66E-01 |
| TPSAB1   | 1.39 | 8.21E-02 | 2.36  | 9.22E-03 | -0.64 | 7.40E-01 |
| BLVRB    | 1.39 | 8.21E-02 | 1.23  | 1.09E-01 | 0.24  | 4.07E-01 |
| FOCAD    | 1.39 | 8.22E-02 | 0.39  | 3.48E-01 | 0.09  | 4.62E-01 |
| C2orf16  | 1.39 | 8.22E-02 | -0.33 | 6.29E-01 | 1.63  | 5.17E-02 |
| INSR     | 1.39 | 8.22E-02 | 0.29  | 3.86E-01 | 0.27  | 3.93E-01 |
| EHBP1L1  | 1.39 | 8.22E-02 | 1.23  | 1.10E-01 | -0.25 | 5.99E-01 |
| C19orf57 | 1.39 | 8.23E-02 | -0.23 | 5.93E-01 | 1.73  | 4.19E-02 |
| SLC6A15  | 1.39 | 8.23E-02 | 0.89  | 1.88E-01 | 1.12  | 1.32E-01 |

|          |      |          |       |          |       |          |
|----------|------|----------|-------|----------|-------|----------|
| EMB      | 1.39 | 8.23E-02 | -0.68 | 7.51E-01 | 2.28  | 1.13E-02 |
| TAAR2    | 1.39 | 8.24E-02 | 2.55  | 5.40E-03 | 0.18  | 4.30E-01 |
| STARD4   | 1.39 | 8.24E-02 | 1.40  | 8.06E-02 | -0.20 | 5.79E-01 |
| MYSM1    | 1.39 | 8.25E-02 | 1.06  | 1.44E-01 | 1.21  | 1.14E-01 |
| GJA10    | 1.39 | 8.26E-02 | -0.21 | 5.84E-01 | 1.52  | 6.45E-02 |
| ZNF713   | 1.39 | 8.26E-02 | 2.02  | 2.15E-02 | -0.46 | 6.77E-01 |
| IDO1     | 1.39 | 8.26E-02 | 1.09  | 1.37E-01 | -0.08 | 5.32E-01 |
| SPTLC2   | 1.39 | 8.26E-02 | 1.18  | 1.20E-01 | -0.09 | 5.35E-01 |
| TFAP2C   | 1.39 | 8.26E-02 | 0.79  | 2.15E-01 | -0.17 | 5.66E-01 |
| GPR111   | 1.39 | 8.27E-02 | 1.57  | 5.81E-02 | -0.94 | 8.27E-01 |
| C1orf210 | 1.39 | 8.28E-02 | 0.81  | 2.08E-01 | 0.42  | 3.39E-01 |
| ZNF781   | 1.39 | 8.28E-02 | 0.95  | 1.70E-01 | -0.15 | 5.59E-01 |
| HORMAD2  | 1.39 | 8.29E-02 | -0.88 | 8.10E-01 | 1.94  | 2.64E-02 |
| SCP2D1   | 1.39 | 8.29E-02 | 1.35  | 8.79E-02 | 0.08  | 4.68E-01 |
| GFY      | 1.38 | 8.31E-02 | 1.84  | 3.29E-02 | -0.44 | 6.70E-01 |
| NANOS1   | 1.38 | 8.31E-02 | 0.68  | 2.47E-01 | 0.69  | 2.44E-01 |
| NXPH3    | 1.38 | 8.32E-02 | 1.27  | 1.02E-01 | -0.33 | 6.27E-01 |
| MC4R     | 1.38 | 8.33E-02 | 0.72  | 2.37E-01 | 0.84  | 2.00E-01 |
| FAN1     | 1.38 | 8.33E-02 | 0.22  | 4.14E-01 | 0.55  | 2.93E-01 |
| ECE1     | 1.38 | 8.35E-02 | 0.78  | 2.19E-01 | 0.00  | 5.02E-01 |
| SYNJ1    | 1.38 | 8.35E-02 | -0.42 | 6.62E-01 | 1.29  | 9.81E-02 |
| CTDSP1   | 1.38 | 8.35E-02 | -0.49 | 6.89E-01 | 1.67  | 4.70E-02 |
| SLC25A42 | 1.38 | 8.36E-02 | 1.06  | 1.45E-01 | -0.28 | 6.09E-01 |
| C11orf73 | 1.38 | 8.36E-02 | 2.83  | 2.35E-03 | -0.26 | 6.01E-01 |
| RNF169   | 1.38 | 8.36E-02 | -0.21 | 5.83E-01 | 1.66  | 4.89E-02 |
| MRPS17   | 1.38 | 8.36E-02 | 1.75  | 4.01E-02 | 0.01  | 4.97E-01 |
| POC5     | 1.38 | 8.37E-02 | 0.77  | 2.22E-01 | 1.32  | 9.41E-02 |
| CUL9     | 1.38 | 8.37E-02 | -0.19 | 5.75E-01 | 2.00  | 2.30E-02 |
| PEAR1    | 1.38 | 8.38E-02 | -0.90 | 8.16E-01 | 2.32  | 1.01E-02 |
| FAP      | 1.38 | 8.38E-02 | 1.42  | 7.81E-02 | -0.03 | 5.13E-01 |
| GPA33    | 1.38 | 8.39E-02 | 1.66  | 4.83E-02 | 0.52  | 3.03E-01 |

|            |      |          |       |          |       |          |
|------------|------|----------|-------|----------|-------|----------|
| C7orf25    | 1.38 | 8.39E-02 | 1.71  | 4.36E-02 | 0.01  | 4.94E-01 |
| SLC25A46   | 1.38 | 8.40E-02 | -0.95 | 8.28E-01 | 2.67  | 3.75E-03 |
| TMEM212    | 1.38 | 8.40E-02 | 0.94  | 1.73E-01 | -0.09 | 5.36E-01 |
| UBE4A      | 1.38 | 8.40E-02 | 0.83  | 2.03E-01 | 0.17  | 4.31E-01 |
| FKBP11     | 1.38 | 8.40E-02 | -0.02 | 5.10E-01 | 1.24  | 1.08E-01 |
| NF2        | 1.38 | 8.41E-02 | -0.53 | 7.03E-01 | 1.77  | 3.80E-02 |
| LGI3       | 1.38 | 8.41E-02 | 0.13  | 4.50E-01 | 1.51  | 6.54E-02 |
| HCRTR2     | 1.38 | 8.41E-02 | 1.58  | 5.70E-02 | 0.20  | 4.21E-01 |
| ABCA8      | 1.38 | 8.41E-02 | 1.15  | 1.26E-01 | -0.20 | 5.78E-01 |
| ISYNA1     | 1.38 | 8.43E-02 | -0.08 | 5.33E-01 | 1.54  | 6.21E-02 |
| PRKCG      | 1.38 | 8.43E-02 | 0.94  | 1.73E-01 | 0.24  | 4.05E-01 |
| CC2D1A     | 1.38 | 8.43E-02 | -0.18 | 5.73E-01 | 1.44  | 7.49E-02 |
| CCL24      | 1.38 | 8.44E-02 | 1.27  | 1.01E-01 | -0.73 | 7.67E-01 |
| TCTB       | 1.38 | 8.44E-02 | 1.89  | 2.92E-02 | -0.84 | 8.01E-01 |
| TMEM252    | 1.38 | 8.44E-02 | 0.73  | 2.32E-01 | 0.55  | 2.92E-01 |
| AC010536.1 | 1.38 | 8.45E-02 | 1.35  | 8.80E-02 | -0.09 | 5.34E-01 |
| ELK3       | 1.38 | 8.46E-02 | 1.47  | 7.11E-02 | 0.52  | 3.03E-01 |
| C2CD4A     | 1.37 | 8.46E-02 | 0.01  | 4.96E-01 | 1.26  | 1.05E-01 |
| VWA3B      | 1.37 | 8.47E-02 | 0.29  | 3.86E-01 | 0.13  | 4.50E-01 |
| RNMTL1     | 1.37 | 8.50E-02 | 1.20  | 1.15E-01 | 0.18  | 4.28E-01 |
| BTBD1      | 1.37 | 8.50E-02 | -1.62 | 9.48E-01 | 3.17  | 7.62E-04 |
| SHC4       | 1.37 | 8.50E-02 | 0.65  | 2.59E-01 | 0.66  | 2.54E-01 |
| PHLDB3     | 1.37 | 8.51E-02 | 1.16  | 1.24E-01 | 0.34  | 3.68E-01 |
| VAMP3      | 1.37 | 8.51E-02 | 0.73  | 2.31E-01 | 0.64  | 2.62E-01 |
| HHLA2      | 1.37 | 8.51E-02 | 1.74  | 4.08E-02 | 0.10  | 4.61E-01 |
| TAS1R3     | 1.37 | 8.52E-02 | 1.17  | 1.21E-01 | 0.14  | 4.44E-01 |
| LAMA2      | 1.37 | 8.52E-02 | 1.47  | 7.12E-02 | -1.06 | 8.55E-01 |
| TMEM71     | 1.37 | 8.52E-02 | 0.32  | 3.74E-01 | 1.23  | 1.10E-01 |
| FMO4       | 1.37 | 8.53E-02 | 0.13  | 4.49E-01 | 1.41  | 7.91E-02 |
| EIF5A11    | 1.37 | 8.54E-02 | -0.30 | 6.20E-01 | 1.97  | 2.41E-02 |
| ATP6C      | 1.37 | 8.54E-02 | 0.80  | 2.11E-01 | 0.73  | 2.33E-01 |

|             |      |          |       |          |       |          |
|-------------|------|----------|-------|----------|-------|----------|
| TCERG1L     | 1.37 | 8.54E-02 | -0.09 | 5.35E-01 | 0.55  | 2.90E-01 |
| PTPN11      | 1.37 | 8.55E-02 | -0.17 | 5.68E-01 | 1.37  | 8.59E-02 |
| MIOS        | 1.37 | 8.55E-02 | 1.83  | 3.37E-02 | -0.34 | 6.35E-01 |
| CCDC109B    | 1.37 | 8.56E-02 | 1.47  | 7.08E-02 | -1.03 | 8.48E-01 |
| MMP7        | 1.37 | 8.56E-02 | -1.27 | 8.97E-01 | 2.30  | 1.07E-02 |
| ACBD6       | 1.37 | 8.56E-02 | -0.19 | 5.76E-01 | 2.72  | 3.29E-03 |
| AGBL2       | 1.37 | 8.57E-02 | 2.11  | 1.73E-02 | -0.63 | 7.35E-01 |
| ZKSCAN8     | 1.37 | 8.57E-02 | 0.53  | 2.99E-01 | 0.44  | 3.29E-01 |
| PTPN4       | 1.37 | 8.58E-02 | 0.21  | 4.15E-01 | 0.62  | 2.69E-01 |
| THEM6       | 1.37 | 8.58E-02 | -0.49 | 6.89E-01 | 1.57  | 5.84E-02 |
| C10orf90    | 1.37 | 8.59E-02 | 1.01  | 1.56E-01 | 1.43  | 7.70E-02 |
| RCL1        | 1.37 | 8.61E-02 | 2.19  | 1.44E-02 | 0.17  | 4.32E-01 |
| NKG7        | 1.37 | 8.61E-02 | 0.79  | 2.15E-01 | 0.68  | 2.50E-01 |
| ARHGAP40    | 1.36 | 8.62E-02 | 1.48  | 6.95E-02 | -0.29 | 6.15E-01 |
| SLC17A5     | 1.36 | 8.62E-02 | 1.51  | 6.52E-02 | -0.73 | 7.67E-01 |
| RPS10-NUDT3 | 1.36 | 8.62E-02 | 0.66  | 2.55E-01 | 0.84  | 2.00E-01 |
| ACTL8       | 1.36 | 8.62E-02 | 0.22  | 4.13E-01 | 0.78  | 2.19E-01 |
| ACTG1       | 1.36 | 8.62E-02 | 0.90  | 1.84E-01 | -0.09 | 5.36E-01 |
| GPR115      | 1.36 | 8.63E-02 | 1.52  | 6.41E-02 | -1.10 | 8.65E-01 |
| TBR1        | 1.36 | 8.63E-02 | 1.04  | 1.48E-01 | 0.32  | 3.76E-01 |
| SHBG        | 1.36 | 8.64E-02 | 2.20  | 1.38E-02 | 0.65  | 2.58E-01 |
| DIS3L2      | 1.36 | 8.65E-02 | 0.76  | 2.24E-01 | 0.91  | 1.83E-01 |
| ZNF470      | 1.36 | 8.66E-02 | 1.67  | 4.73E-02 | -1.14 | 8.72E-01 |
| WDR52       | 1.36 | 8.66E-02 | 1.44  | 7.47E-02 | -1.56 | 9.41E-01 |
| CLIC5       | 1.36 | 8.67E-02 | 2.09  | 1.84E-02 | 0.49  | 3.14E-01 |
| SYCP1       | 1.36 | 8.67E-02 | 0.14  | 4.44E-01 | 0.61  | 2.72E-01 |
| ZSCAN9      | 1.36 | 8.69E-02 | 0.68  | 2.47E-01 | 0.12  | 4.53E-01 |
| SPAST       | 1.36 | 8.69E-02 | -0.56 | 7.14E-01 | 1.67  | 4.78E-02 |
| PSAP        | 1.36 | 8.70E-02 | 2.51  | 6.10E-03 | -1.58 | 9.43E-01 |
| FXYD2       | 1.36 | 8.70E-02 | -0.40 | 6.57E-01 | 1.08  | 1.40E-01 |
| GIGYF1      | 1.36 | 8.72E-02 | 0.67  | 2.52E-01 | 0.86  | 1.95E-01 |

|           |      |          |       |          |       |          |
|-----------|------|----------|-------|----------|-------|----------|
| ASIC3     | 1.36 | 8.72E-02 | 0.83  | 2.03E-01 | 0.20  | 4.22E-01 |
| ADCK3     | 1.36 | 8.72E-02 | 0.44  | 3.29E-01 | 1.71  | 4.39E-02 |
| SLC35G6   | 1.36 | 8.72E-02 | -0.43 | 6.65E-01 | 1.04  | 1.49E-01 |
| EOGT      | 1.36 | 8.73E-02 | 0.08  | 4.68E-01 | 0.27  | 3.92E-01 |
| TOM1L2    | 1.36 | 8.73E-02 | 2.04  | 2.07E-02 | -1.22 | 8.88E-01 |
| MAEA      | 1.36 | 8.74E-02 | 1.17  | 1.22E-01 | 2.54  | 5.48E-03 |
| MPLKIP    | 1.36 | 8.74E-02 | 1.14  | 1.27E-01 | -0.02 | 5.06E-01 |
| AGAP3     | 1.36 | 8.75E-02 | 0.96  | 1.70E-01 | -0.53 | 7.01E-01 |
| HFM1      | 1.36 | 8.76E-02 | 0.50  | 3.08E-01 | 0.54  | 2.96E-01 |
| GPR89B    | 1.36 | 8.76E-02 | 0.83  | 2.03E-01 | 0.63  | 2.64E-01 |
| BBC3      | 1.35 | 8.77E-02 | 1.51  | 6.60E-02 | -0.42 | 6.63E-01 |
| NME8      | 1.35 | 8.77E-02 | 0.50  | 3.08E-01 | 0.80  | 2.13E-01 |
| MTF2      | 1.35 | 8.78E-02 | 0.70  | 2.42E-01 | 1.38  | 8.35E-02 |
| CERCAM    | 1.35 | 8.80E-02 | 0.54  | 2.95E-01 | 0.69  | 2.45E-01 |
| OR5B12    | 1.35 | 8.80E-02 | 0.38  | 3.52E-01 | 1.15  | 1.24E-01 |
| SLC16A12  | 1.35 | 8.80E-02 | 1.40  | 8.10E-02 | -0.78 | 7.83E-01 |
| EML2      | 1.35 | 8.80E-02 | 1.04  | 1.50E-01 | -0.18 | 5.72E-01 |
| OR10A2    | 1.35 | 8.81E-02 | 1.83  | 3.33E-02 | -0.33 | 6.29E-01 |
| C12orf42  | 1.35 | 8.81E-02 | 0.49  | 3.11E-01 | 0.23  | 4.11E-01 |
| RPS3A     | 1.35 | 8.81E-02 | 0.83  | 2.02E-01 | 0.67  | 2.51E-01 |
| C9orf84   | 1.35 | 8.81E-02 | 0.73  | 2.33E-01 | 0.97  | 1.66E-01 |
| PTCH1     | 1.35 | 8.81E-02 | -0.02 | 5.08E-01 | 0.92  | 1.79E-01 |
| SPINK1    | 1.35 | 8.83E-02 | 1.43  | 7.57E-02 | -0.42 | 6.61E-01 |
| MPV17L2   | 1.35 | 8.84E-02 | 2.21  | 1.36E-02 | -0.71 | 7.62E-01 |
| PARVA     | 1.35 | 8.84E-02 | -0.86 | 8.05E-01 | 1.84  | 3.29E-02 |
| HNRNPA2B1 | 1.35 | 8.84E-02 | -1.25 | 8.94E-01 | 2.12  | 1.71E-02 |
| ZFP30     | 1.35 | 8.84E-02 | 0.81  | 2.08E-01 | 0.05  | 4.81E-01 |
| HOXD4     | 1.35 | 8.85E-02 | -0.96 | 8.32E-01 | 2.79  | 2.65E-03 |
| PGS1      | 1.35 | 8.85E-02 | -0.15 | 5.61E-01 | 1.99  | 2.31E-02 |
| FAM43B    | 1.35 | 8.86E-02 | 1.02  | 1.53E-01 | 0.49  | 3.14E-01 |
| DCN       | 1.35 | 8.86E-02 | 1.51  | 6.61E-02 | -0.77 | 7.79E-01 |

|          |      |          |       |          |       |          |
|----------|------|----------|-------|----------|-------|----------|
| ESCO2    | 1.35 | 8.86E-02 | 1.98  | 2.37E-02 | -1.80 | 9.64E-01 |
| CHMP1B   | 1.35 | 8.86E-02 | -0.20 | 5.78E-01 | 1.40  | 8.05E-02 |
| HKR1     | 1.35 | 8.88E-02 | 0.87  | 1.92E-01 | -0.17 | 5.68E-01 |
| C2orf82  | 1.35 | 8.88E-02 | 0.19  | 4.25E-01 | 1.57  | 5.81E-02 |
| ARHGEF1  | 1.35 | 8.89E-02 | 0.88  | 1.89E-01 | 0.95  | 1.70E-01 |
| BDKRB1   | 1.35 | 8.89E-02 | 1.15  | 1.24E-01 | 0.84  | 1.99E-01 |
| PDZD3    | 1.35 | 8.90E-02 | 1.58  | 5.74E-02 | -0.51 | 6.97E-01 |
| PHOSPHO2 | 1.35 | 8.91E-02 | 0.37  | 3.55E-01 | 2.20  | 1.39E-02 |
| GDPD5    | 1.35 | 8.91E-02 | 0.62  | 2.69E-01 | 0.61  | 2.72E-01 |
| TNIK     | 1.35 | 8.92E-02 | 0.77  | 2.22E-01 | 1.65  | 4.93E-02 |
| SYT13    | 1.35 | 8.93E-02 | 0.08  | 4.70E-01 | 1.07  | 1.43E-01 |
| ROBO1    | 1.34 | 8.94E-02 | 1.69  | 4.55E-02 | 1.77  | 3.84E-02 |
| PARP2    | 1.34 | 8.94E-02 | 1.19  | 1.18E-01 | -0.07 | 5.29E-01 |
| TLX1     | 1.34 | 8.94E-02 | 0.11  | 4.56E-01 | 1.58  | 5.76E-02 |
| CLDN11   | 1.34 | 8.94E-02 | 0.88  | 1.90E-01 | -0.47 | 6.82E-01 |
| GGACT    | 1.34 | 8.95E-02 | 0.79  | 2.16E-01 | 1.24  | 1.08E-01 |
| APOH     | 1.34 | 8.99E-02 | 1.27  | 1.02E-01 | -0.15 | 5.60E-01 |
| OTUD7B   | 1.34 | 9.01E-02 | 1.14  | 1.28E-01 | -0.29 | 6.15E-01 |
| YEATS4   | 1.34 | 9.01E-02 | -0.17 | 5.69E-01 | 1.19  | 1.18E-01 |
| RPEL1    | 1.34 | 9.03E-02 | -0.32 | 6.25E-01 | 1.08  | 1.40E-01 |
| ZNF43    | 1.34 | 9.03E-02 | 0.70  | 2.42E-01 | 0.07  | 4.72E-01 |
| RPL31    | 1.34 | 9.03E-02 | 1.37  | 8.56E-02 | 0.42  | 3.37E-01 |
| CLU      | 1.34 | 9.05E-02 | 0.74  | 2.31E-01 | 0.24  | 4.04E-01 |
| WBP2     | 1.34 | 9.05E-02 | -0.03 | 5.12E-01 | 2.20  | 1.40E-02 |
| TM4SF18  | 1.34 | 9.05E-02 | 0.29  | 3.86E-01 | 0.02  | 4.92E-01 |
| UNK      | 1.34 | 9.05E-02 | 0.46  | 3.24E-01 | 1.66  | 4.84E-02 |
| KLHL10   | 1.34 | 9.06E-02 | 1.61  | 5.34E-02 | -0.19 | 5.75E-01 |
| TMEM121  | 1.34 | 9.07E-02 | 1.00  | 1.58E-01 | 0.20  | 4.23E-01 |
| NBEAL1   | 1.34 | 9.07E-02 | 0.27  | 3.92E-01 | 0.48  | 3.15E-01 |
| WBP1L    | 1.34 | 9.08E-02 | -0.54 | 7.07E-01 | 1.73  | 4.18E-02 |
| B4GALNT4 | 1.34 | 9.09E-02 | -0.02 | 5.07E-01 | 1.19  | 1.17E-01 |



|          |      |          |       |          |       |          |
|----------|------|----------|-------|----------|-------|----------|
| GSG1L    | 1.33 | 9.10E-02 | 1.72  | 4.29E-02 | -1.81 | 9.65E-01 |
| PDIA3    | 1.33 | 9.11E-02 | 1.91  | 2.80E-02 | -0.39 | 6.53E-01 |
| MRPL43   | 1.33 | 9.11E-02 | -0.14 | 5.56E-01 | 1.47  | 7.12E-02 |
| RNF10    | 1.33 | 9.11E-02 | 0.87  | 1.91E-01 | -0.03 | 5.12E-01 |
| NKTR     | 1.33 | 9.11E-02 | 0.71  | 2.38E-01 | 0.34  | 3.65E-01 |
| AADAC    | 1.33 | 9.11E-02 | 1.32  | 9.27E-02 | -0.41 | 6.59E-01 |
| OSGEP    | 1.33 | 9.12E-02 | -0.45 | 6.74E-01 | 1.54  | 6.20E-02 |
| CDCA7L   | 1.33 | 9.12E-02 | 1.56  | 5.98E-02 | 0.52  | 3.02E-01 |
| RBM22    | 1.33 | 9.12E-02 | 1.17  | 1.21E-01 | 0.11  | 4.58E-01 |
| SH3PXD2A | 1.33 | 9.12E-02 | 2.21  | 1.35E-02 | -0.10 | 5.41E-01 |
| TIAM2    | 1.33 | 9.13E-02 | 0.27  | 3.93E-01 | 0.80  | 2.12E-01 |
| LLPH     | 1.33 | 9.13E-02 | 1.18  | 1.19E-01 | -0.29 | 6.15E-01 |
| ARFGAP1  | 1.33 | 9.14E-02 | -0.07 | 5.27E-01 | 1.40  | 8.04E-02 |
| NEK2     | 1.33 | 9.14E-02 | 0.92  | 1.79E-01 | 0.65  | 2.57E-01 |
| ELAVL2   | 1.33 | 9.14E-02 | 1.15  | 1.25E-01 | -1.01 | 8.43E-01 |
| OR2M5    | 1.33 | 9.15E-02 | -0.07 | 5.29E-01 | 2.55  | 5.35E-03 |
| PRDM9    | 1.33 | 9.16E-02 | 1.24  | 1.07E-01 | 0.08  | 4.66E-01 |
| IL8      | 1.33 | 9.16E-02 | 0.81  | 2.10E-01 | 0.60  | 2.73E-01 |
| HEATR5A  | 1.33 | 9.16E-02 | 1.49  | 6.75E-02 | 0.81  | 2.09E-01 |
| RPRM     | 1.33 | 9.16E-02 | -0.91 | 8.20E-01 | 1.93  | 2.70E-02 |
| MEI4     | 1.33 | 9.16E-02 | 1.46  | 7.23E-02 | -0.29 | 6.13E-01 |
| LY6K     | 1.33 | 9.16E-02 | -0.48 | 6.85E-01 | 1.60  | 5.43E-02 |
| GPRC5B   | 1.33 | 9.16E-02 | -0.68 | 7.51E-01 | 2.17  | 1.50E-02 |
| OR4D5    | 1.33 | 9.17E-02 | 0.83  | 2.03E-01 | 0.70  | 2.43E-01 |
| ISOC1    | 1.33 | 9.20E-02 | 0.88  | 1.90E-01 | 0.12  | 4.53E-01 |
| FCER1A   | 1.33 | 9.20E-02 | 1.51  | 6.59E-02 | 0.00  | 4.98E-01 |
| OR6F1    | 1.33 | 9.21E-02 | 1.90  | 2.87E-02 | -1.33 | 9.09E-01 |
| ZBTB32   | 1.33 | 9.21E-02 | -0.13 | 5.53E-01 | 1.58  | 5.73E-02 |
| ZNF585B  | 1.33 | 9.22E-02 | -0.02 | 5.09E-01 | 1.14  | 1.27E-01 |
| BATF2    | 1.33 | 9.23E-02 | 0.16  | 4.37E-01 | 1.10  | 1.35E-01 |
| IGF2     | 1.33 | 9.23E-02 | 1.39  | 8.17E-02 | -0.89 | 8.14E-01 |

|           |      |          |       |          |       |          |
|-----------|------|----------|-------|----------|-------|----------|
| RPS19     | 1.33 | 9.24E-02 | 0.84  | 1.99E-01 | 0.51  | 3.05E-01 |
| HOXC9     | 1.33 | 9.25E-02 | -0.29 | 6.13E-01 | 1.38  | 8.31E-02 |
| SOX9      | 1.33 | 9.25E-02 | 0.36  | 3.60E-01 | 0.73  | 2.33E-01 |
| MED28     | 1.32 | 9.26E-02 | 0.95  | 1.71E-01 | 0.19  | 4.24E-01 |
| ASPRV1    | 1.32 | 9.26E-02 | 0.00  | 5.00E-01 | 0.90  | 1.85E-01 |
| ACTR2     | 1.32 | 9.27E-02 | 0.67  | 2.52E-01 | 0.15  | 4.39E-01 |
| PTPN1     | 1.32 | 9.28E-02 | -0.96 | 8.32E-01 | 1.76  | 3.91E-02 |
| OR2T8     | 1.32 | 9.28E-02 | 1.13  | 1.29E-01 | 0.11  | 4.57E-01 |
| RNASEL    | 1.32 | 9.28E-02 | -0.82 | 7.95E-01 | 1.59  | 5.63E-02 |
| TBX15     | 1.32 | 9.29E-02 | -0.14 | 5.56E-01 | 0.58  | 2.80E-01 |
| SLC27A4   | 1.32 | 9.31E-02 | 1.37  | 8.53E-02 | 1.24  | 1.07E-01 |
| SPATA7    | 1.32 | 9.31E-02 | 1.69  | 4.57E-02 | 0.56  | 2.87E-01 |
| SRSF1     | 1.32 | 9.32E-02 | 0.49  | 3.12E-01 | 0.90  | 1.84E-01 |
| TBPL2     | 1.32 | 9.32E-02 | 1.56  | 5.89E-02 | -0.62 | 7.32E-01 |
| DNALI1    | 1.32 | 9.33E-02 | 1.95  | 2.58E-02 | 1.53  | 6.24E-02 |
| GNB1L     | 1.32 | 9.33E-02 | 1.99  | 2.34E-02 | -0.41 | 6.61E-01 |
| ALX1      | 1.32 | 9.33E-02 | 0.68  | 2.47E-01 | 0.24  | 4.06E-01 |
| IGSF21    | 1.32 | 9.34E-02 | 2.03  | 2.13E-02 | 0.78  | 2.17E-01 |
| CCDC83    | 1.32 | 9.34E-02 | 0.96  | 1.70E-01 | 0.02  | 4.93E-01 |
| ASB15     | 1.32 | 9.34E-02 | 2.64  | 4.14E-03 | -1.16 | 8.77E-01 |
| PKN3      | 1.32 | 9.34E-02 | 0.23  | 4.11E-01 | 0.71  | 2.40E-01 |
| HIST1H2AH | 1.32 | 9.34E-02 | 0.23  | 4.09E-01 | 1.15  | 1.25E-01 |
| DSTYK     | 1.32 | 9.35E-02 | 1.46  | 7.24E-02 | -0.29 | 6.12E-01 |
| ZNF607    | 1.32 | 9.35E-02 | 1.16  | 1.22E-01 | -0.34 | 6.32E-01 |
| NAA11     | 1.32 | 9.35E-02 | 1.78  | 3.76E-02 | 0.20  | 4.22E-01 |
| CREB3L2   | 1.32 | 9.35E-02 | 0.48  | 3.14E-01 | 0.25  | 4.01E-01 |
| RAPSN     | 1.32 | 9.36E-02 | 1.93  | 2.67E-02 | 1.37  | 8.53E-02 |
| EML5      | 1.32 | 9.36E-02 | 0.02  | 4.93E-01 | 1.67  | 4.72E-02 |
| ZNF239    | 1.32 | 9.37E-02 | 1.52  | 6.38E-02 | -0.73 | 7.67E-01 |
| HPD       | 1.32 | 9.37E-02 | 1.45  | 7.30E-02 | -0.29 | 6.13E-01 |
| SP7       | 1.32 | 9.38E-02 | 0.30  | 3.84E-01 | 0.79  | 2.14E-01 |

|          |      |          |       |          |       |          |
|----------|------|----------|-------|----------|-------|----------|
| CDC73    | 1.32 | 9.38E-02 | 0.05  | 4.79E-01 | 2.65  | 4.01E-03 |
| ADAM18   | 1.32 | 9.38E-02 | 0.50  | 3.08E-01 | 0.01  | 4.96E-01 |
| EDN1     | 1.32 | 9.38E-02 | 1.88  | 3.00E-02 | -0.52 | 7.00E-01 |
| SLC2A10  | 1.32 | 9.39E-02 | 1.34  | 9.00E-02 | -0.41 | 6.60E-01 |
| SMARCC2  | 1.32 | 9.39E-02 | -0.18 | 5.71E-01 | 1.40  | 8.02E-02 |
| RBM44    | 1.32 | 9.39E-02 | 0.76  | 2.24E-01 | 0.26  | 3.97E-01 |
| ZRANB1   | 1.32 | 9.40E-02 | 1.31  | 9.51E-02 | 0.60  | 2.74E-01 |
| FAM63A   | 1.32 | 9.41E-02 | -0.12 | 5.50E-01 | 0.82  | 2.06E-01 |
| FNBP4    | 1.32 | 9.41E-02 | 1.88  | 3.02E-02 | -0.26 | 6.03E-01 |
| C11orf40 | 1.32 | 9.41E-02 | 1.65  | 4.97E-02 | 1.27  | 1.02E-01 |
| ARHGAP25 | 1.32 | 9.41E-02 | 1.09  | 1.38E-01 | -0.09 | 5.37E-01 |
| AKR1B10  | 1.32 | 9.41E-02 | 1.69  | 4.54E-02 | -0.02 | 5.08E-01 |
| IFI44    | 1.32 | 9.42E-02 | -0.23 | 5.91E-01 | 2.61  | 4.55E-03 |
| PRDM11   | 1.32 | 9.42E-02 | -0.20 | 5.78E-01 | 0.88  | 1.90E-01 |
| FAM175B  | 1.31 | 9.43E-02 | 0.69  | 2.44E-01 | 0.08  | 4.68E-01 |
| CMTM4    | 1.31 | 9.44E-02 | -1.32 | 9.07E-01 | 2.84  | 2.23E-03 |
| POU5F1B  | 1.31 | 9.45E-02 | 0.05  | 4.81E-01 | 1.33  | 9.21E-02 |
| SLC9C1   | 1.31 | 9.45E-02 | 1.40  | 8.09E-02 | 0.77  | 2.21E-01 |
| NDUFA7   | 1.31 | 9.45E-02 | 0.44  | 3.32E-01 | 0.98  | 1.63E-01 |
| TMPRSS4  | 1.31 | 9.47E-02 | 0.57  | 2.85E-01 | 0.25  | 4.02E-01 |
| DYNLL1   | 1.31 | 9.47E-02 | 0.99  | 1.61E-01 | 0.02  | 4.91E-01 |
| RHBDD2   | 1.31 | 9.47E-02 | 1.18  | 1.19E-01 | -0.03 | 5.13E-01 |
| MRFAP1   | 1.31 | 9.48E-02 | 0.75  | 2.28E-01 | 0.61  | 2.72E-01 |
| SPINT3   | 1.31 | 9.48E-02 | 0.83  | 2.04E-01 | 0.28  | 3.90E-01 |
| STAM2    | 1.31 | 9.48E-02 | -0.57 | 7.17E-01 | 1.22  | 1.10E-01 |
| LOXL4    | 1.31 | 9.49E-02 | -0.02 | 5.07E-01 | 1.43  | 7.63E-02 |
| SEMA4G   | 1.31 | 9.50E-02 | -0.31 | 6.24E-01 | 1.44  | 7.53E-02 |
| RPL7A    | 1.31 | 9.50E-02 | -0.26 | 6.03E-01 | 1.23  | 1.09E-01 |
| NDUFA7   | 1.31 | 9.51E-02 | 0.44  | 3.30E-01 | 0.97  | 1.66E-01 |
| SEPHS2   | 1.31 | 9.51E-02 | 1.64  | 5.03E-02 | -1.12 | 8.68E-01 |
| CD164L2  | 1.31 | 9.51E-02 | 0.47  | 3.18E-01 | 0.84  | 2.02E-01 |

|           |      |          |       |          |       |          |
|-----------|------|----------|-------|----------|-------|----------|
| KLK8      | 1.31 | 9.52E-02 | 0.66  | 2.56E-01 | 2.13  | 1.65E-02 |
| MBNL2     | 1.31 | 9.54E-02 | -0.65 | 7.43E-01 | 0.98  | 1.64E-01 |
| LINC01100 | 1.31 | 9.54E-02 | 1.30  | 9.61E-02 | -0.13 | 5.50E-01 |
| OR11H6    | 1.31 | 9.55E-02 | -0.78 | 7.83E-01 | 2.23  | 1.28E-02 |
| XPO6      | 1.31 | 9.55E-02 | -0.16 | 5.65E-01 | 1.21  | 1.13E-01 |
| H3F3B     | 1.31 | 9.56E-02 | 1.39  | 8.27E-02 | 1.45  | 7.31E-02 |
| UBE2C     | 1.31 | 9.57E-02 | 0.67  | 2.52E-01 | 0.98  | 1.64E-01 |
| ADAM29    | 1.31 | 9.57E-02 | 0.97  | 1.67E-01 | 0.26  | 3.97E-01 |
| DEFA4     | 1.31 | 9.57E-02 | 1.90  | 2.85E-02 | -0.77 | 7.80E-01 |
| SERP2     | 1.31 | 9.57E-02 | 1.43  | 7.64E-02 | -0.56 | 7.14E-01 |
| STYXL1    | 1.31 | 9.58E-02 | -1.40 | 9.19E-01 | 2.28  | 1.12E-02 |
| C7orf50   | 1.31 | 9.58E-02 | -0.12 | 5.49E-01 | 1.87  | 3.09E-02 |
| NCOA6     | 1.31 | 9.59E-02 | 0.57  | 2.83E-01 | 0.71  | 2.39E-01 |
| BARD1     | 1.30 | 9.60E-02 | 0.30  | 3.84E-01 | 1.47  | 7.09E-02 |
| DSC3      | 1.30 | 9.62E-02 | -1.32 | 9.07E-01 | 2.48  | 6.65E-03 |
| XPO4      | 1.30 | 9.63E-02 | 0.07  | 4.73E-01 | 1.41  | 7.88E-02 |
| C9orf96   | 1.30 | 9.64E-02 | -0.13 | 5.52E-01 | 1.24  | 1.07E-01 |
| GPR160    | 1.30 | 9.64E-02 | -0.87 | 8.07E-01 | 2.20  | 1.38E-02 |
| FFAR1     | 1.30 | 9.65E-02 | 0.57  | 2.84E-01 | 0.88  | 1.89E-01 |
| NFE2L3    | 1.30 | 9.65E-02 | -1.31 | 9.04E-01 | 1.94  | 2.61E-02 |
| UBQLNL    | 1.30 | 9.66E-02 | -0.26 | 6.03E-01 | 1.30  | 9.60E-02 |
| DKK2      | 1.30 | 9.68E-02 | 1.94  | 2.63E-02 | -0.83 | 7.98E-01 |
| LRRCS3    | 1.30 | 9.68E-02 | -0.40 | 6.56E-01 | 1.42  | 7.74E-02 |
| PKP4      | 1.30 | 9.69E-02 | 0.78  | 2.17E-01 | 0.07  | 4.70E-01 |
| AIM1L     | 1.30 | 9.69E-02 | 1.13  | 1.30E-01 | -0.58 | 7.18E-01 |
| ELOVL2    | 1.30 | 9.70E-02 | 0.80  | 2.10E-01 | 0.18  | 4.30E-01 |
| GTF2H5    | 1.30 | 9.70E-02 | -0.06 | 5.23E-01 | 1.47  | 7.05E-02 |
| CD320     | 1.30 | 9.70E-02 | 0.25  | 4.02E-01 | 0.95  | 1.70E-01 |
| AKAP6     | 1.30 | 9.71E-02 | 1.09  | 1.39E-01 | -0.22 | 5.88E-01 |
| SYT1      | 1.30 | 9.71E-02 | 3.36  | 3.85E-04 | 0.48  | 3.16E-01 |
| TP53INP2  | 1.30 | 9.72E-02 | 0.81  | 2.08E-01 | 0.76  | 2.24E-01 |

|           |      |          |       |          |       |          |
|-----------|------|----------|-------|----------|-------|----------|
| DYTN      | 1.30 | 9.72E-02 | 1.57  | 5.87E-02 | 1.39  | 8.30E-02 |
| SNRNP27   | 1.30 | 9.72E-02 | 1.58  | 5.75E-02 | -0.23 | 5.91E-01 |
| MEF2A     | 1.30 | 9.73E-02 | 2.12  | 1.69E-02 | -0.10 | 5.42E-01 |
| RBAK      | 1.30 | 9.74E-02 | 0.88  | 1.89E-01 | 1.76  | 3.89E-02 |
| PAPSS2    | 1.30 | 9.75E-02 | -0.91 | 8.18E-01 | 1.55  | 6.11E-02 |
| RNF148    | 1.30 | 9.75E-02 | -0.64 | 7.39E-01 | 1.89  | 2.93E-02 |
| PTPLAD1   | 1.30 | 9.76E-02 | 2.61  | 4.51E-03 | -0.14 | 5.57E-01 |
| ISLR      | 1.30 | 9.76E-02 | 0.09  | 4.63E-01 | 1.36  | 8.71E-02 |
| ZNF775    | 1.30 | 9.76E-02 | 0.41  | 3.41E-01 | -0.05 | 5.21E-01 |
| KIAA0319  | 1.29 | 9.77E-02 | 0.32  | 3.75E-01 | 0.51  | 3.05E-01 |
| TRIM6     | 1.29 | 9.78E-02 | 0.26  | 3.97E-01 | 2.04  | 2.08E-02 |
| METAP2    | 1.29 | 9.78E-02 | 0.59  | 2.78E-01 | 0.78  | 2.17E-01 |
| PRR4      | 1.29 | 9.79E-02 | 1.32  | 9.39E-02 | 0.66  | 2.56E-01 |
| MTRNR2L13 | 1.29 | 9.79E-02 | 0.89  | 1.87E-01 | -0.02 | 5.07E-01 |
| NEK11     | 1.29 | 9.79E-02 | 2.15  | 1.59E-02 | -1.29 | 9.01E-01 |
| SCRN2     | 1.29 | 9.80E-02 | 0.41  | 3.42E-01 | 0.87  | 1.93E-01 |
| MTPN      | 1.29 | 9.80E-02 | 1.19  | 1.17E-01 | 0.35  | 3.62E-01 |
| MB21D1    | 1.29 | 9.82E-02 | 1.81  | 3.51E-02 | -0.84 | 8.00E-01 |
| KDM3A     | 1.29 | 9.82E-02 | 0.99  | 1.60E-01 | 0.02  | 4.93E-01 |
| ARHGAP44  | 1.29 | 9.82E-02 | -0.32 | 6.27E-01 | 1.60  | 5.44E-02 |
| DGCR14    | 1.29 | 9.82E-02 | 1.15  | 1.26E-01 | -0.68 | 7.53E-01 |
| MAL       | 1.29 | 9.82E-02 | -0.50 | 6.93E-01 | 1.75  | 3.98E-02 |
| SRRT      | 1.29 | 9.83E-02 | 0.78  | 2.18E-01 | 0.32  | 3.76E-01 |
| FBXO25    | 1.29 | 9.84E-02 | 1.69  | 4.54E-02 | -0.08 | 5.33E-01 |
| KRT26     | 1.29 | 9.84E-02 | -0.12 | 5.48E-01 | 0.87  | 1.93E-01 |
| TXNRD1    | 1.29 | 9.85E-02 | 0.95  | 1.72E-01 | -0.08 | 5.31E-01 |
| CTSB      | 1.29 | 9.86E-02 | 0.34  | 3.67E-01 | 2.55  | 5.38E-03 |
| CDKN2A    | 1.29 | 9.86E-02 | 1.74  | 4.08E-02 | -0.97 | 8.33E-01 |
| PET117    | 1.29 | 9.86E-02 | 0.73  | 2.31E-01 | 0.99  | 1.61E-01 |
| APLNR     | 1.29 | 9.87E-02 | -1.66 | 9.51E-01 | 2.17  | 1.49E-02 |
| CISH      | 1.29 | 9.87E-02 | 1.32  | 9.31E-02 | -0.25 | 6.00E-01 |

|          |      |          |       |          |       |          |
|----------|------|----------|-------|----------|-------|----------|
| ETHE1    | 1.29 | 9.88E-02 | 1.20  | 1.15E-01 | 0.04  | 4.84E-01 |
| COQ3     | 1.29 | 9.88E-02 | -0.07 | 5.26E-01 | 1.10  | 1.35E-01 |
| ADAM9    | 1.29 | 9.89E-02 | 1.92  | 2.72E-02 | -1.03 | 8.48E-01 |
| SH3BGRL2 | 1.29 | 9.89E-02 | 1.86  | 3.12E-02 | -0.62 | 7.31E-01 |
| TRIM56   | 1.29 | 9.90E-02 | -0.06 | 5.25E-01 | 2.30  | 1.07E-02 |
| IL17C    | 1.29 | 9.91E-02 | 1.04  | 1.50E-01 | 0.39  | 3.47E-01 |
| NABP2    | 1.29 | 9.91E-02 | 1.65  | 4.96E-02 | 0.52  | 3.02E-01 |
| OR6C6    | 1.29 | 9.92E-02 | 0.34  | 3.67E-01 | 1.09  | 1.38E-01 |
| DUSP27   | 1.29 | 9.92E-02 | 1.84  | 3.32E-02 | -0.73 | 7.67E-01 |
| CIITA    | 1.29 | 9.93E-02 | 0.87  | 1.91E-01 | 0.14  | 4.45E-01 |
| PIWIL2   | 1.29 | 9.93E-02 | 1.67  | 4.74E-02 | -0.81 | 7.92E-01 |
| FGF5     | 1.28 | 9.94E-02 | 1.43  | 7.62E-02 | -0.26 | 6.03E-01 |
| RRS1     | 1.28 | 9.95E-02 | -1.05 | 8.54E-01 | 1.59  | 5.62E-02 |
| WBSCR16  | 1.28 | 9.95E-02 | 0.94  | 1.74E-01 | 0.52  | 3.02E-01 |
| OCLN     | 1.28 | 9.96E-02 | 0.68  | 2.50E-01 | 1.11  | 1.34E-01 |
| RBP5     | 1.28 | 9.96E-02 | 0.58  | 2.81E-01 | 2.32  | 1.03E-02 |
| VLDLR    | 1.28 | 9.97E-02 | 1.51  | 6.56E-02 | 0.38  | 3.51E-01 |
| GPX7     | 1.28 | 9.97E-02 | -0.04 | 5.17E-01 | 2.66  | 3.91E-03 |
| AKAP12   | 1.28 | 9.97E-02 | -0.26 | 6.03E-01 | 0.71  | 2.39E-01 |
| CACNA1C  | 1.28 | 1.00E-01 | 1.89  | 2.93E-02 | 1.80  | 3.59E-02 |
| TEX10    | 1.28 | 1.00E-01 | 0.77  | 2.20E-01 | 0.13  | 4.49E-01 |
| ORC3     | 1.28 | 1.00E-01 | -0.19 | 5.76E-01 | 1.27  | 1.02E-01 |
| SS18     | 1.28 | 1.00E-01 | -0.60 | 7.26E-01 | 1.46  | 7.20E-02 |
| AHDC1    | 1.28 | 1.00E-01 | 0.58  | 2.80E-01 | 1.37  | 8.61E-02 |
| TMBIM6   | 1.28 | 1.00E-01 | 1.70  | 4.49E-02 | -0.32 | 6.24E-01 |
| SCN3A    | 1.28 | 1.00E-01 | 1.19  | 1.18E-01 | -0.41 | 6.58E-01 |
| CLMP     | 1.28 | 1.00E-01 | 0.05  | 4.82E-01 | 0.57  | 2.84E-01 |
| MCF2L    | 1.28 | 1.00E-01 | 0.43  | 3.34E-01 | 1.08  | 1.40E-01 |
| LIMS2    | 1.28 | 1.00E-01 | -0.97 | 8.35E-01 | 2.44  | 7.43E-03 |
| MTURN    | 1.28 | 1.00E-01 | 0.81  | 2.08E-01 | 0.46  | 3.22E-01 |
| PDZD8    | 1.28 | 1.00E-01 | 0.40  | 3.45E-01 | 0.87  | 1.91E-01 |

|           |      |          |       |          |       |          |
|-----------|------|----------|-------|----------|-------|----------|
| COL19A1   | 1.28 | 1.00E-01 | -0.96 | 8.30E-01 | 1.24  | 1.07E-01 |
| ACOT2     | 1.28 | 1.01E-01 | 0.66  | 2.55E-01 | 2.28  | 1.14E-02 |
| ADSS      | 1.28 | 1.01E-01 | 0.65  | 2.59E-01 | 1.67  | 4.70E-02 |
| HIGD1B    | 1.28 | 1.01E-01 | 0.69  | 2.45E-01 | 0.68  | 2.49E-01 |
| GYS2      | 1.28 | 1.01E-01 | 0.53  | 3.00E-01 | 1.40  | 8.09E-02 |
| SH2D4A    | 1.28 | 1.01E-01 | 1.50  | 6.64E-02 | -0.40 | 6.55E-01 |
| SLC22A8   | 1.28 | 1.01E-01 | 1.91  | 2.83E-02 | -0.06 | 5.23E-01 |
| BAI3      | 1.28 | 1.01E-01 | -0.36 | 6.42E-01 | 0.44  | 3.28E-01 |
| MYBPC1    | 1.28 | 1.01E-01 | 0.94  | 1.73E-01 | 0.31  | 3.78E-01 |
| TSPAN3    | 1.28 | 1.01E-01 | -0.09 | 5.34E-01 | 0.90  | 1.85E-01 |
| DVL3      | 1.28 | 1.01E-01 | 0.54  | 2.94E-01 | 0.61  | 2.70E-01 |
| STIM2     | 1.28 | 1.01E-01 | -0.35 | 6.36E-01 | 1.01  | 1.57E-01 |
| C19orf24  | 1.28 | 1.01E-01 | 0.13  | 4.49E-01 | 1.16  | 1.24E-01 |
| CBLN3     | 1.28 | 1.01E-01 | -0.38 | 6.47E-01 | 1.77  | 3.84E-02 |
| LBX1      | 1.27 | 1.01E-01 | 1.29  | 9.84E-02 | 0.20  | 4.22E-01 |
| CCDC65    | 1.27 | 1.01E-01 | 0.17  | 4.31E-01 | 0.96  | 1.69E-01 |
| TMPRSS11F | 1.27 | 1.01E-01 | 1.04  | 1.50E-01 | -0.04 | 5.17E-01 |
| OR13D1    | 1.27 | 1.01E-01 | 0.40  | 3.43E-01 | 0.53  | 2.98E-01 |
| RMDN2     | 1.27 | 1.01E-01 | 1.22  | 1.11E-01 | 0.87  | 1.92E-01 |
| FAM222A   | 1.27 | 1.01E-01 | 1.56  | 5.93E-02 | -1.02 | 8.46E-01 |
| CABP1     | 1.27 | 1.01E-01 | 1.24  | 1.08E-01 | 1.03  | 1.53E-01 |
| IL12RB2   | 1.27 | 1.01E-01 | -0.69 | 7.54E-01 | 1.46  | 7.16E-02 |
| CCDC71    | 1.27 | 1.02E-01 | -1.46 | 9.28E-01 | 2.28  | 1.13E-02 |
| DNAJC19   | 1.27 | 1.02E-01 | 0.42  | 3.39E-01 | 2.19  | 1.42E-02 |
| METTL21A  | 1.27 | 1.02E-01 | 0.68  | 2.47E-01 | 1.03  | 1.51E-01 |
| ARSJ      | 1.27 | 1.02E-01 | 1.19  | 1.17E-01 | -0.30 | 6.19E-01 |
| TCEB1     | 1.27 | 1.02E-01 | 0.46  | 3.22E-01 | 1.16  | 1.24E-01 |
| STX6      | 1.27 | 1.02E-01 | 0.16  | 4.37E-01 | 1.75  | 4.00E-02 |
| RSL24D1   | 1.27 | 1.02E-01 | 0.41  | 3.41E-01 | 0.58  | 2.81E-01 |
| INPP5F    | 1.27 | 1.02E-01 | 1.62  | 5.30E-02 | 0.24  | 4.04E-01 |
| HTR3B     | 1.27 | 1.02E-01 | -0.23 | 5.90E-01 | 2.50  | 6.13E-03 |

|           |       |      |          |       |          |       |          |
|-----------|-------|------|----------|-------|----------|-------|----------|
| EDIL3     |       | 1.27 | 1.03E-01 | 1.40  | 8.02E-02 | -0.42 | 6.64E-01 |
| RFNG      |       | 1.27 | 1.03E-01 | 2.43  | 7.64E-03 | -0.28 | 6.11E-01 |
| TUBB2B    |       | 1.27 | 1.03E-01 | 0.20  | 4.23E-01 | 1.07  | 1.43E-01 |
| RALGAPA1  |       | 1.27 | 1.03E-01 | -0.15 | 5.61E-01 | 1.10  | 1.36E-01 |
| DYNC2H1   |       | 1.27 | 1.03E-01 | 0.99  | 1.61E-01 | -0.10 | 5.40E-01 |
| KCTD7     |       | 1.27 | 1.03E-01 | 1.71  | 4.35E-02 | 0.47  | 3.20E-01 |
| ZNF678    |       | 1.27 | 1.03E-01 | 0.15  | 4.39E-01 | 0.42  | 3.36E-01 |
| MDH2      |       | 1.26 | 1.03E-01 | -1.60 | 9.46E-01 | 2.14  | 1.63E-02 |
| CRTAC1    |       | 1.26 | 1.03E-01 | 0.18  | 4.29E-01 | 1.43  | 7.67E-02 |
| CCDC113   |       | 1.26 | 1.03E-01 | 1.82  | 3.46E-02 | -0.63 | 7.36E-01 |
| DCDC1     |       | 1.26 | 1.03E-01 | -0.03 | 5.11E-01 | 1.10  | 1.36E-01 |
| C1QL1     |       | 1.26 | 1.03E-01 | 1.83  | 3.37E-02 | 1.09  | 1.38E-01 |
| PLK2      |       | 1.26 | 1.03E-01 | 0.59  | 2.79E-01 | 1.02  | 1.54E-01 |
| NIPSNAP3A |       | 1.26 | 1.03E-01 | 0.63  | 2.64E-01 | 0.80  | 2.12E-01 |
| KLK11     |       | 1.26 | 1.03E-01 | -0.88 | 8.10E-01 | 1.37  | 8.57E-02 |
| RELL2     |       | 1.26 | 1.04E-01 | 2.51  | 6.10E-03 | 0.43  | 3.35E-01 |
| CDIP1     |       | 1.26 | 1.04E-01 | 1.17  | 1.21E-01 | 0.68  | 2.47E-01 |
| PFN2      |       | 1.26 | 1.04E-01 | 1.41  | 7.99E-02 | 2.67  | 3.77E-03 |
| DNAJC3    |       | 1.26 | 1.04E-01 | 1.27  | 1.03E-01 | 0.18  | 4.29E-01 |
| PLA2G7    |       | 1.26 | 1.04E-01 | 1.49  | 6.84E-02 | 0.03  | 4.86E-01 |
| CSMD2     |       | 1.26 | 1.04E-01 | 0.90  | 1.85E-01 | 0.30  | 3.81E-01 |
| ING1      |       | 1.26 | 1.04E-01 | -0.86 | 8.04E-01 | 1.80  | 3.61E-02 |
|           | PDZD7 | 1.26 | 1.04E-01 | 0.80  | 2.11E-01 | 0.11  | 4.56E-01 |
| SLC35A5   |       | 1.26 | 1.04E-01 | 0.79  | 2.16E-01 | 0.36  | 3.59E-01 |
| CSNK1A1L  |       | 1.26 | 1.04E-01 | -0.55 | 7.07E-01 | 1.49  | 6.77E-02 |
| CDH13     |       | 1.26 | 1.04E-01 | 0.30  | 3.84E-01 | -0.21 | 5.84E-01 |
| CCDC36    |       | 1.26 | 1.04E-01 | -1.27 | 8.98E-01 | 2.65  | 4.08E-03 |
| UPK1B     |       | 1.26 | 1.04E-01 | 0.92  | 1.78E-01 | 0.66  | 2.54E-01 |
| SLC22A11  |       | 1.26 | 1.04E-01 | -0.03 | 5.10E-01 | 1.58  | 5.70E-02 |
| STAB1     |       | 1.26 | 1.04E-01 | 1.05  | 1.46E-01 | 0.18  | 4.30E-01 |
| MTA1      |       | 1.25 | 1.05E-01 | 1.09  | 1.37E-01 | 0.01  | 4.95E-01 |



|            |      |          |       |          |       |          |
|------------|------|----------|-------|----------|-------|----------|
| LTBP1      | 1.25 | 1.05E-01 | -1.59 | 9.44E-01 | 2.81  | 2.44E-03 |
| DHPS       | 1.25 | 1.05E-01 | -0.84 | 7.99E-01 | 1.46  | 7.19E-02 |
| PDE10A     | 1.25 | 1.05E-01 | 1.71  | 4.34E-02 | -0.98 | 8.37E-01 |
| FAM169A    | 1.25 | 1.05E-01 | 0.36  | 3.59E-01 | 0.43  | 3.32E-01 |
| RARG       | 1.25 | 1.05E-01 | 0.53  | 2.98E-01 | 0.01  | 4.97E-01 |
| GFAP       | 1.25 | 1.05E-01 | 2.03  | 2.13E-02 | -0.04 | 5.18E-01 |
| ABHD12B    | 1.25 | 1.05E-01 | 1.59  | 5.54E-02 | -0.65 | 7.42E-01 |
| HOXD3      | 1.25 | 1.05E-01 | 1.07  | 1.42E-01 | 2.17  | 1.48E-02 |
| GCA        | 1.25 | 1.05E-01 | 1.54  | 6.13E-02 | -0.26 | 6.04E-01 |
| MADD       | 1.25 | 1.05E-01 | 0.80  | 2.13E-01 | 1.32  | 9.37E-02 |
| SLC24A3    | 1.25 | 1.05E-01 | 2.45  | 7.05E-03 | 1.06  | 1.44E-01 |
| LELP1      | 1.25 | 1.05E-01 | -0.73 | 7.69E-01 | 3.12  | 8.93E-04 |
| JADE1      | 1.25 | 1.05E-01 | 1.47  | 7.01E-02 | -0.18 | 5.71E-01 |
| OR52E6     | 1.25 | 1.05E-01 | 0.41  | 3.40E-01 | 0.90  | 1.84E-01 |
| HNRNPL     | 1.25 | 1.05E-01 | 1.71  | 4.37E-02 | 0.57  | 2.85E-01 |
| FMNL2      | 1.25 | 1.05E-01 | 0.02  | 4.91E-01 | 0.41  | 3.42E-01 |
| GP2        | 1.25 | 1.05E-01 | -0.03 | 5.11E-01 | 1.04  | 1.49E-01 |
| SMIM1      | 1.25 | 1.06E-01 | 0.98  | 1.64E-01 | 0.35  | 3.64E-01 |
| ZP4        | 1.25 | 1.06E-01 | 0.14  | 4.43E-01 | 1.24  | 1.08E-01 |
| KRTAP10-10 | 1.25 | 1.06E-01 | 1.41  | 7.96E-02 | -0.86 | 8.05E-01 |
| UHRF2      | 1.25 | 1.06E-01 | -1.58 | 9.42E-01 | 3.03  | 1.21E-03 |
| ADAMTS13   | 1.25 | 1.06E-01 | -0.76 | 7.78E-01 | 0.88  | 1.88E-01 |
| CLRN2      | 1.25 | 1.06E-01 | 1.12  | 1.31E-01 | -0.70 | 7.58E-01 |
| HARBI1     | 1.25 | 1.06E-01 | 0.01  | 4.94E-01 | 1.44  | 7.50E-02 |
| C1orf141   | 1.25 | 1.06E-01 | 0.53  | 3.00E-01 | 0.39  | 3.48E-01 |
| HAT1       | 1.25 | 1.06E-01 | 1.10  | 1.35E-01 | 0.04  | 4.85E-01 |
| TAS2R19    | 1.25 | 1.06E-01 | 2.02  | 2.18E-02 | -0.15 | 5.60E-01 |
| ARHGAP23   | 1.25 | 1.06E-01 | -0.30 | 6.17E-01 | 0.87  | 1.91E-01 |
| GTF2B      | 1.25 | 1.06E-01 | -0.92 | 8.20E-01 | 2.32  | 1.01E-02 |
| B3GALT6    | 1.25 | 1.06E-01 | -0.74 | 7.72E-01 | 1.36  | 8.66E-02 |
| MXD1       | 1.25 | 1.06E-01 | 1.64  | 5.03E-02 | -0.55 | 7.10E-01 |

|         |      |          |       |          |       |          |
|---------|------|----------|-------|----------|-------|----------|
| SPINK4  | 1.25 | 1.06E-01 | 1.72  | 4.25E-02 | -0.83 | 7.96E-01 |
| TTC21B  | 1.25 | 1.06E-01 | -0.98 | 8.37E-01 | 2.03  | 2.10E-02 |
| HEYL    | 1.25 | 1.06E-01 | 1.09  | 1.37E-01 | 0.30  | 3.82E-01 |
| STAC    | 1.25 | 1.06E-01 | 0.25  | 4.00E-01 | 0.68  | 2.48E-01 |
| HOXD1   | 1.25 | 1.06E-01 | -0.23 | 5.91E-01 | 2.22  | 1.33E-02 |
| ZNF660  | 1.25 | 1.06E-01 | 0.34  | 3.66E-01 | 1.01  | 1.57E-01 |
| MCOLN1  | 1.25 | 1.06E-01 | 1.84  | 3.31E-02 | 0.41  | 3.41E-01 |
| PFN4    | 1.25 | 1.07E-01 | 1.28  | 9.97E-02 | -0.61 | 7.31E-01 |
| CCDC64  | 1.25 | 1.07E-01 | -0.26 | 6.01E-01 | 1.48  | 7.00E-02 |
| THY1    | 1.25 | 1.07E-01 | 1.95  | 2.56E-02 | -0.34 | 6.31E-01 |
| MDFI    | 1.24 | 1.07E-01 | -0.99 | 8.39E-01 | 2.30  | 1.07E-02 |
| WFDC9   | 1.24 | 1.07E-01 | 0.93  | 1.77E-01 | -0.63 | 7.36E-01 |
| BEST4   | 1.24 | 1.07E-01 | 1.73  | 4.16E-02 | -1.04 | 8.50E-01 |
| DHRS4   | 1.24 | 1.07E-01 | -0.48 | 6.84E-01 | 1.37  | 8.58E-02 |
| GPR114  | 1.24 | 1.07E-01 | 0.23  | 4.08E-01 | 0.73  | 2.33E-01 |
| SFMBT2  | 1.24 | 1.07E-01 | -0.17 | 5.67E-01 | 2.29  | 1.11E-02 |
| SEMA4D  | 1.24 | 1.07E-01 | -0.53 | 7.03E-01 | 1.96  | 2.50E-02 |
| RRP7A   | 1.24 | 1.07E-01 | -1.00 | 8.41E-01 | 1.93  | 2.71E-02 |
| FAM173B | 1.24 | 1.07E-01 | 0.92  | 1.79E-01 | 0.93  | 1.76E-01 |
| KCTD16  | 1.24 | 1.07E-01 | 0.83  | 2.02E-01 | -0.41 | 6.58E-01 |
| SLC17A2 | 1.24 | 1.07E-01 | 0.96  | 1.68E-01 | -0.35 | 6.36E-01 |
| POLR1D  | 1.24 | 1.07E-01 | 2.12  | 1.68E-02 | -0.93 | 8.24E-01 |
| TECPR2  | 1.24 | 1.07E-01 | 1.95  | 2.55E-02 | 1.29  | 9.88E-02 |
| TMEM40  | 1.24 | 1.07E-01 | 1.18  | 1.19E-01 | 0.31  | 3.79E-01 |
| REM1    | 1.24 | 1.07E-01 | 2.03  | 2.12E-02 | 1.74  | 4.09E-02 |
| WNT10B  | 1.24 | 1.07E-01 | 0.00  | 5.00E-01 | 0.88  | 1.90E-01 |
| NOTCH3  | 1.24 | 1.07E-01 | -0.62 | 7.32E-01 | 2.18  | 1.45E-02 |
| SLC45A1 | 1.24 | 1.07E-01 | 0.96  | 1.68E-01 | -0.02 | 5.09E-01 |
| CHMP3   | 1.24 | 1.08E-01 | 0.31  | 3.79E-01 | 0.26  | 3.98E-01 |
| PDHB    | 1.24 | 1.08E-01 | 1.57  | 5.78E-02 | -0.12 | 5.47E-01 |
| WBSCR17 | 1.24 | 1.08E-01 | -0.32 | 6.26E-01 | 2.24  | 1.24E-02 |

|               |      |          |       |          |       |          |
|---------------|------|----------|-------|----------|-------|----------|
| RAB25         | 1.24 | 1.08E-01 | 0.87  | 1.93E-01 | 0.40  | 3.43E-01 |
| ISG15         | 1.24 | 1.08E-01 | 1.01  | 1.57E-01 | 0.04  | 4.85E-01 |
| TTC8          | 1.24 | 1.08E-01 | 0.13  | 4.48E-01 | 1.77  | 3.81E-02 |
| ZNF697        | 1.24 | 1.08E-01 | 1.01  | 1.56E-01 | -0.41 | 6.60E-01 |
| ARL8B         | 1.24 | 1.08E-01 | 2.05  | 2.01E-02 | -1.16 | 8.76E-01 |
| INSIG1        | 1.24 | 1.08E-01 | 1.33  | 9.17E-02 | 0.31  | 3.80E-01 |
| DRD3          | 1.24 | 1.08E-01 | 1.83  | 3.34E-02 | -0.59 | 7.23E-01 |
| COX7C         | 1.24 | 1.08E-01 | 1.51  | 6.60E-02 | -0.50 | 6.90E-01 |
| AFF4          | 1.24 | 1.08E-01 | 0.43  | 3.35E-01 | 0.39  | 3.48E-01 |
| HCAR3         | 1.24 | 1.08E-01 | 1.57  | 5.83E-02 | -1.03 | 8.49E-01 |
| ASNSD1        | 1.24 | 1.08E-01 | 0.66  | 2.54E-01 | 1.47  | 7.11E-02 |
| C6orf165      | 1.24 | 1.08E-01 | -0.05 | 5.19E-01 | 1.42  | 7.78E-02 |
| CADPS         | 1.24 | 1.08E-01 | 0.75  | 2.27E-01 | 1.14  | 1.28E-01 |
| SLC24A1       | 1.23 | 1.08E-01 | 2.54  | 5.61E-03 | -0.18 | 5.71E-01 |
| ANKRD44       | 1.23 | 1.09E-01 | 0.00  | 5.00E-01 | 1.57  | 5.81E-02 |
| CDH10         | 1.23 | 1.09E-01 | 2.52  | 5.90E-03 | -1.58 | 9.43E-01 |
| FH            | 1.23 | 1.09E-01 | -1.14 | 8.72E-01 | 2.31  | 1.04E-02 |
| RP11-599B13.6 | 1.23 | 1.09E-01 | 0.60  | 2.73E-01 | 0.61  | 2.70E-01 |
| GDNF          | 1.23 | 1.09E-01 | -0.41 | 6.59E-01 | 2.69  | 3.56E-03 |
| CCDC28B       | 1.23 | 1.09E-01 | -1.56 | 9.40E-01 | 2.10  | 1.80E-02 |
| C5orf15       | 1.23 | 1.09E-01 | 1.18  | 1.19E-01 | -0.08 | 5.33E-01 |
| CRYGD         | 1.23 | 1.09E-01 | -0.86 | 8.04E-01 | 2.27  | 1.15E-02 |
| NDUFA10       | 1.23 | 1.09E-01 | 0.02  | 4.92E-01 | 0.77  | 2.21E-01 |
| GPD2          | 1.23 | 1.09E-01 | 0.93  | 1.75E-01 | 0.16  | 4.35E-01 |
| TESC          | 1.23 | 1.09E-01 | 1.26  | 1.04E-01 | -0.14 | 5.55E-01 |
| TXLNB         | 1.23 | 1.09E-01 | 2.59  | 4.84E-03 | -0.58 | 7.20E-01 |
| OAF           | 1.23 | 1.09E-01 | 1.68  | 4.65E-02 | -0.58 | 7.18E-01 |
| MVB12A        | 1.23 | 1.09E-01 | 0.48  | 3.15E-01 | -0.41 | 6.59E-01 |
| LDOC1L        | 1.23 | 1.09E-01 | 1.87  | 3.06E-02 | -1.97 | 9.76E-01 |
| ADGB          | 1.23 | 1.09E-01 | 1.15  | 1.24E-01 | 0.18  | 4.27E-01 |
| CSF3R         | 1.23 | 1.09E-01 | 1.88  | 3.02E-02 | -0.93 | 8.25E-01 |

|           |      |          |       |          |       |          |
|-----------|------|----------|-------|----------|-------|----------|
| KCNA10    | 1.23 | 1.09E-01 | 1.31  | 9.54E-02 | 0.45  | 3.25E-01 |
| APBA2     | 1.23 | 1.10E-01 | -0.22 | 5.87E-01 | 1.31  | 9.51E-02 |
| PXK       | 1.23 | 1.10E-01 | 1.73  | 4.17E-02 | -0.68 | 7.53E-01 |
| AMHR2     | 1.23 | 1.10E-01 | -0.09 | 5.37E-01 | 1.17  | 1.22E-01 |
| LUC7L2    | 1.23 | 1.10E-01 | 0.44  | 3.31E-01 | 0.52  | 3.01E-01 |
| C3orf35   | 1.23 | 1.10E-01 | 0.84  | 2.00E-01 | 0.07  | 4.72E-01 |
| LMLN      | 1.23 | 1.10E-01 | 0.28  | 3.89E-01 | 1.08  | 1.40E-01 |
| MRGPRX3   | 1.23 | 1.10E-01 | 2.98  | 1.45E-03 | 0.99  | 1.60E-01 |
| CHD4      | 1.23 | 1.10E-01 | 1.83  | 3.38E-02 | -1.40 | 9.20E-01 |
| APEH      | 1.23 | 1.10E-01 | 0.18  | 4.28E-01 | 2.97  | 1.48E-03 |
| NRBF2     | 1.23 | 1.10E-01 | 0.38  | 3.52E-01 | 1.74  | 4.09E-02 |
| LTA4H     | 1.23 | 1.10E-01 | 0.20  | 4.21E-01 | 1.65  | 4.98E-02 |
| C14orf2   | 1.23 | 1.10E-01 | 1.59  | 5.61E-02 | -0.73 | 7.66E-01 |
| AAMDC     | 1.23 | 1.10E-01 | 0.38  | 3.51E-01 | 1.45  | 7.34E-02 |
| CEP152    | 1.22 | 1.10E-01 | 0.61  | 2.70E-01 | 1.40  | 8.06E-02 |
| ABHD12    | 1.22 | 1.11E-01 | -0.11 | 5.45E-01 | 1.23  | 1.10E-01 |
| SNRPB2    | 1.22 | 1.11E-01 | -0.13 | 5.53E-01 | 1.96  | 2.50E-02 |
| FLT1      | 1.22 | 1.11E-01 | 2.47  | 6.77E-03 | 0.47  | 3.21E-01 |
| FAM71B    | 1.22 | 1.11E-01 | -0.18 | 5.73E-01 | 0.76  | 2.25E-01 |
| YPEL4     | 1.22 | 1.11E-01 | 0.06  | 4.75E-01 | 1.39  | 8.21E-02 |
| SLC35D1   | 1.22 | 1.11E-01 | 1.39  | 8.28E-02 | 0.46  | 3.23E-01 |
| ZNF629    | 1.22 | 1.11E-01 | 0.39  | 3.49E-01 | 0.98  | 1.63E-01 |
| C17orf105 | 1.22 | 1.11E-01 | 2.28  | 1.12E-02 | -0.84 | 7.99E-01 |
| APOA2     | 1.22 | 1.11E-01 | 0.87  | 1.92E-01 | 2.26  | 1.20E-02 |
| EIF4E3    | 1.22 | 1.11E-01 | 1.85  | 3.22E-02 | -2.16 | 9.85E-01 |
| FAM228B   | 1.22 | 1.11E-01 | 0.96  | 1.68E-01 | -0.40 | 6.57E-01 |
| DEFB134   | 1.22 | 1.11E-01 | 0.44  | 3.31E-01 | 0.99  | 1.61E-01 |
| SNRNP40   | 1.22 | 1.11E-01 | -0.88 | 8.09E-01 | 1.46  | 7.20E-02 |
| C1orf194  | 1.22 | 1.11E-01 | 0.57  | 2.84E-01 | 0.69  | 2.44E-01 |
| YARS      | 1.22 | 1.11E-01 | 0.70  | 2.41E-01 | 1.45  | 7.36E-02 |
| FCRL6     | 1.22 | 1.11E-01 | 0.71  | 2.38E-01 | -0.31 | 6.22E-01 |

|                |      |          |       |          |       |          |
|----------------|------|----------|-------|----------|-------|----------|
| CADM1          | 1.22 | 1.11E-01 | 0.52  | 3.00E-01 | -0.34 | 6.32E-01 |
| SEL1L3         | 1.22 | 1.11E-01 | 1.03  | 1.52E-01 | 1.95  | 2.57E-02 |
| DNAJB12        | 1.22 | 1.11E-01 | 0.61  | 2.72E-01 | 0.65  | 2.57E-01 |
| CR1            | 1.22 | 1.11E-01 | 1.16  | 1.23E-01 | 0.83  | 2.02E-01 |
| PTPRH          | 1.22 | 1.11E-01 | 1.76  | 3.93E-02 | -1.28 | 9.00E-01 |
| ART4           | 1.22 | 1.11E-01 | -0.14 | 5.54E-01 | 0.90  | 1.83E-01 |
| FAM195A        | 1.22 | 1.11E-01 | 0.74  | 2.31E-01 | 0.02  | 4.93E-01 |
| DNAJC15        | 1.22 | 1.12E-01 | -1.12 | 8.68E-01 | 2.60  | 4.64E-03 |
| ANXA11         | 1.22 | 1.12E-01 | 1.26  | 1.05E-01 | 0.79  | 2.14E-01 |
| PPP2R1B        | 1.22 | 1.12E-01 | 1.69  | 4.55E-02 | 0.75  | 2.27E-01 |
| TNKS1BP1       | 1.22 | 1.12E-01 | -0.77 | 7.79E-01 | 1.60  | 5.46E-02 |
| VIP            | 1.22 | 1.12E-01 | -0.05 | 5.21E-01 | 0.61  | 2.70E-01 |
| KRTAP2-2       | 1.22 | 1.12E-01 | 1.20  | 1.16E-01 | 0.05  | 4.80E-01 |
| KIF26B         | 1.22 | 1.12E-01 | -0.29 | 6.14E-01 | 1.00  | 1.59E-01 |
| SLC2A6         | 1.22 | 1.12E-01 | -1.21 | 8.88E-01 | 1.24  | 1.08E-01 |
| PAQR4          | 1.22 | 1.12E-01 | 0.81  | 2.08E-01 | 0.57  | 2.84E-01 |
| NDUF57         | 1.22 | 1.12E-01 | 2.02  | 2.16E-02 | -0.58 | 7.20E-01 |
| ZNF234         | 1.22 | 1.12E-01 | 1.61  | 5.42E-02 | 0.03  | 4.87E-01 |
| SLPI           | 1.22 | 1.12E-01 | 1.03  | 1.51E-01 | -0.38 | 6.49E-01 |
| G6PC2          | 1.21 | 1.12E-01 | -0.28 | 6.11E-01 | 1.36  | 8.62E-02 |
| TRIM2          | 1.21 | 1.12E-01 | 1.15  | 1.25E-01 | 0.83  | 2.02E-01 |
| DLG2           | 1.21 | 1.12E-01 | 1.24  | 1.08E-01 | -0.13 | 5.50E-01 |
| C3orf58        | 1.21 | 1.12E-01 | 1.09  | 1.38E-01 | -0.09 | 5.34E-01 |
| C7orf55-LUC7L2 | 1.21 | 1.12E-01 | 0.42  | 3.36E-01 | 0.52  | 3.03E-01 |
| AKR1C3         | 1.21 | 1.13E-01 | 0.91  | 1.82E-01 | -1.06 | 8.54E-01 |
| ZNF569         | 1.21 | 1.13E-01 | 0.77  | 2.22E-01 | -0.24 | 5.94E-01 |
| ZNF518B        | 1.21 | 1.13E-01 | -0.13 | 5.53E-01 | 1.28  | 1.01E-01 |
| ASB4           | 1.21 | 1.13E-01 | 2.22  | 1.31E-02 | -0.71 | 7.60E-01 |
| C3orf55        | 1.21 | 1.13E-01 | 1.41  | 7.99E-02 | 0.32  | 3.75E-01 |
| FAM186B        | 1.21 | 1.13E-01 | 0.75  | 2.26E-01 | 0.13  | 4.50E-01 |
| NSF            | 1.21 | 1.13E-01 | 1.09  | 1.38E-01 | 0.25  | 3.99E-01 |

|              |      |          |       |          |       |          |
|--------------|------|----------|-------|----------|-------|----------|
| EBF3         | 1.21 | 1.13E-01 | 0.96  | 1.68E-01 | 1.63  | 5.12E-02 |
| MED19        | 1.21 | 1.13E-01 | 1.59  | 5.61E-02 | -0.10 | 5.41E-01 |
| C10orf128    | 1.21 | 1.13E-01 | -0.99 | 8.38E-01 | 0.83  | 2.04E-01 |
| C11orf80     | 1.21 | 1.13E-01 | 1.52  | 6.39E-02 | -0.16 | 5.64E-01 |
| CHD6         | 1.21 | 1.13E-01 | 1.58  | 5.75E-02 | 0.39  | 3.49E-01 |
| REEP4        | 1.21 | 1.13E-01 | 1.26  | 1.03E-01 | 0.27  | 3.95E-01 |
| CXXC11       | 1.21 | 1.13E-01 | 0.05  | 4.79E-01 | 1.22  | 1.12E-01 |
| RNF103-CHMP3 | 1.21 | 1.13E-01 | 0.30  | 3.84E-01 | 0.23  | 4.10E-01 |
| SYT3         | 1.21 | 1.13E-01 | 0.64  | 2.62E-01 | 0.87  | 1.93E-01 |
| PRNT         | 1.21 | 1.13E-01 | 1.24  | 1.08E-01 | -0.60 | 7.26E-01 |
| RABGGTB      | 1.21 | 1.13E-01 | -0.38 | 6.49E-01 | 1.69  | 4.59E-02 |
| NT5C3B       | 1.21 | 1.13E-01 | 1.53  | 6.34E-02 | -0.44 | 6.71E-01 |
| EPM2AIP1     | 1.21 | 1.14E-01 | 0.20  | 4.19E-01 | 0.94  | 1.73E-01 |
| DNAJC11      | 1.21 | 1.14E-01 | 1.12  | 1.30E-01 | 0.45  | 3.25E-01 |
| ACTR10       | 1.21 | 1.14E-01 | 0.61  | 2.70E-01 | 1.53  | 6.29E-02 |
| TREM2        | 1.21 | 1.14E-01 | 0.31  | 3.80E-01 | 1.58  | 5.68E-02 |
| GPR22        | 1.21 | 1.14E-01 | 1.38  | 8.45E-02 | 1.69  | 4.54E-02 |
| ZNF521       | 1.21 | 1.14E-01 | 1.60  | 5.47E-02 | 1.91  | 2.82E-02 |
| NRCAM        | 1.21 | 1.14E-01 | 1.66  | 4.89E-02 | 0.11  | 4.56E-01 |
| LCLAT1       | 1.20 | 1.14E-01 | 1.10  | 1.36E-01 | 0.07  | 4.72E-01 |
| MNT          | 1.20 | 1.14E-01 | -0.01 | 5.04E-01 | 1.50  | 6.70E-02 |
| DDC          | 1.20 | 1.14E-01 | 0.69  | 2.44E-01 | 0.59  | 2.79E-01 |
| CNST         | 1.20 | 1.14E-01 | 1.61  | 5.41E-02 | -1.63 | 9.48E-01 |
| RNF2         | 1.20 | 1.15E-01 | -0.58 | 7.19E-01 | 1.67  | 4.72E-02 |
| CRYBA4       | 1.20 | 1.15E-01 | 1.79  | 3.67E-02 | -0.16 | 5.64E-01 |
| TMEM179      | 1.20 | 1.15E-01 | -0.65 | 7.43E-01 | 1.54  | 6.23E-02 |
| ACTA1        | 1.20 | 1.15E-01 | -1.20 | 8.84E-01 | 1.95  | 2.53E-02 |
| CLNK         | 1.20 | 1.15E-01 | 0.15  | 4.41E-01 | 0.82  | 2.06E-01 |
| UNC13A       | 1.20 | 1.15E-01 | 0.06  | 4.74E-01 | 0.89  | 1.87E-01 |
| BLACE        | 1.20 | 1.15E-01 | 1.33  | 9.11E-02 | -0.67 | 7.50E-01 |
| FAM187B      | 1.20 | 1.15E-01 | 2.06  | 1.96E-02 | -0.70 | 7.57E-01 |

|           |      |          |       |          |       |          |
|-----------|------|----------|-------|----------|-------|----------|
| RNF19B    | 1.20 | 1.15E-01 | -0.77 | 7.79E-01 | 1.56  | 5.99E-02 |
| MBD2      | 1.20 | 1.15E-01 | 1.11  | 1.34E-01 | -0.22 | 5.85E-01 |
| PLD2      | 1.20 | 1.15E-01 | 1.39  | 8.22E-02 | -0.24 | 5.94E-01 |
| TNRC6B    | 1.20 | 1.15E-01 | 0.54  | 2.95E-01 | 0.51  | 3.05E-01 |
| ZKSCAN7   | 1.20 | 1.15E-01 | 0.14  | 4.44E-01 | 1.17  | 1.22E-01 |
| NUP210    | 1.20 | 1.15E-01 | 1.61  | 5.33E-02 | -1.43 | 9.24E-01 |
| KCNH8     | 1.20 | 1.15E-01 | -1.24 | 8.93E-01 | 2.61  | 4.58E-03 |
| CBX3      | 1.20 | 1.15E-01 | -1.51 | 9.34E-01 | 1.99  | 2.36E-02 |
| CHTF18    | 1.20 | 1.15E-01 | 1.69  | 4.53E-02 | -0.42 | 6.64E-01 |
| KIAA0319L | 1.20 | 1.15E-01 | 0.29  | 3.84E-01 | 0.29  | 3.88E-01 |
| TRAF5     | 1.20 | 1.15E-01 | 1.37  | 8.54E-02 | -0.12 | 5.49E-01 |
| BAG4      | 1.20 | 1.15E-01 | -0.06 | 5.24E-01 | 2.87  | 2.07E-03 |
| IRX6      | 1.20 | 1.15E-01 | -1.28 | 8.99E-01 | 1.80  | 3.57E-02 |
| SERPINF1  | 1.20 | 1.15E-01 | 0.41  | 3.41E-01 | -0.02 | 5.09E-01 |
| LARP6     | 1.20 | 1.15E-01 | 0.92  | 1.79E-01 | -0.04 | 5.16E-01 |
| ITCH      | 1.20 | 1.16E-01 | 0.69  | 2.44E-01 | 0.45  | 3.26E-01 |
| TMEM246   | 1.20 | 1.16E-01 | 0.72  | 2.35E-01 | 0.16  | 4.35E-01 |
| SCYL1     | 1.20 | 1.16E-01 | 0.78  | 2.17E-01 | -0.31 | 6.21E-01 |
| SYCE1     | 1.20 | 1.16E-01 | 1.82  | 3.44E-02 | -1.27 | 8.98E-01 |
| TLL1      | 1.20 | 1.16E-01 | 0.63  | 2.65E-01 | 1.78  | 3.73E-02 |
| C2orf57   | 1.20 | 1.16E-01 | 1.25  | 1.07E-01 | -0.06 | 5.23E-01 |
| RNF138    | 1.20 | 1.16E-01 | 0.28  | 3.91E-01 | 0.45  | 3.26E-01 |
| LRP4      | 1.20 | 1.16E-01 | 0.45  | 3.27E-01 | 1.43  | 7.70E-02 |
| CCNH      | 1.20 | 1.16E-01 | 1.42  | 7.76E-02 | -0.85 | 8.03E-01 |
| SMOC1     | 1.20 | 1.16E-01 | 0.65  | 2.59E-01 | -0.87 | 8.08E-01 |
| IMPG1     | 1.20 | 1.16E-01 | 0.30  | 3.81E-01 | -0.05 | 5.19E-01 |
| VWA9      | 1.20 | 1.16E-01 | 2.43  | 7.47E-03 | -0.34 | 6.32E-01 |
| DPAGT1    | 1.19 | 1.16E-01 | 1.83  | 3.40E-02 | -1.41 | 9.21E-01 |
| YTHDC2    | 1.19 | 1.16E-01 | 0.51  | 3.04E-01 | 0.27  | 3.94E-01 |
| KATNAL2   | 1.19 | 1.16E-01 | 0.59  | 2.78E-01 | -0.17 | 5.68E-01 |
| MYO1A     | 1.19 | 1.16E-01 | -0.10 | 5.42E-01 | 1.56  | 5.88E-02 |

|            |      |          |       |          |       |          |
|------------|------|----------|-------|----------|-------|----------|
| PRPF40B    | 1.19 | 1.16E-01 | 0.89  | 1.87E-01 | 0.01  | 4.94E-01 |
| POSTN      | 1.19 | 1.16E-01 | 0.80  | 2.12E-01 | -0.39 | 6.53E-01 |
| FUT8       | 1.19 | 1.16E-01 | 1.70  | 4.50E-02 | -0.03 | 5.12E-01 |
| AP006621.5 | 1.19 | 1.17E-01 | 0.42  | 3.39E-01 | 0.03  | 4.87E-01 |
| MCMBP      | 1.19 | 1.17E-01 | 0.98  | 1.63E-01 | 0.43  | 3.32E-01 |
| PEX11B     | 1.19 | 1.17E-01 | 0.38  | 3.52E-01 | 1.24  | 1.08E-01 |
| TLE1       | 1.19 | 1.17E-01 | 2.30  | 1.08E-02 | -0.50 | 6.93E-01 |
| TMEM68     | 1.19 | 1.17E-01 | -0.08 | 5.30E-01 | 0.99  | 1.62E-01 |
| RAB38      | 1.19 | 1.17E-01 | -1.89 | 9.71E-01 | 3.37  | 3.70E-04 |
| RSPH3      | 1.19 | 1.17E-01 | 1.04  | 1.50E-01 | 0.03  | 4.89E-01 |
| GPHA2      | 1.19 | 1.17E-01 | 0.58  | 2.81E-01 | 0.46  | 3.24E-01 |
| OR2A25     | 1.19 | 1.17E-01 | -0.21 | 5.84E-01 | 1.22  | 1.10E-01 |
| ZNF770     | 1.19 | 1.17E-01 | 1.80  | 3.60E-02 | 0.79  | 2.15E-01 |
| MARVELD3   | 1.19 | 1.17E-01 | 0.39  | 3.48E-01 | 1.26  | 1.04E-01 |
| GPR26      | 1.19 | 1.17E-01 | 0.29  | 3.85E-01 | 0.37  | 3.55E-01 |
| ALS2CR11   | 1.19 | 1.17E-01 | -0.22 | 5.87E-01 | 1.33  | 9.15E-02 |
| PSME4      | 1.19 | 1.17E-01 | 1.03  | 1.52E-01 | -0.60 | 7.25E-01 |
| GUCD1      | 1.19 | 1.17E-01 | 0.24  | 4.06E-01 | 0.89  | 1.86E-01 |
| TRPM6      | 1.19 | 1.17E-01 | 0.79  | 2.14E-01 | 2.06  | 1.95E-02 |
| BARHL2     | 1.19 | 1.17E-01 | 1.02  | 1.53E-01 | 1.55  | 6.10E-02 |
| SMCO2      | 1.19 | 1.17E-01 | -0.08 | 5.31E-01 | 3.49  | 2.43E-04 |
| CPE        | 1.19 | 1.17E-01 | 0.16  | 4.37E-01 | 1.26  | 1.04E-01 |
| GRAMD3     | 1.19 | 1.17E-01 | 1.26  | 1.04E-01 | 1.47  | 7.11E-02 |
| SLC12A8    | 1.19 | 1.17E-01 | 1.68  | 4.67E-02 | 1.44  | 7.45E-02 |
| KIF15      | 1.19 | 1.17E-01 | 0.66  | 2.54E-01 | 0.36  | 3.58E-01 |
| ZNF503     | 1.19 | 1.17E-01 | 1.10  | 1.36E-01 | -0.04 | 5.17E-01 |
| GLDN       | 1.19 | 1.18E-01 | 0.16  | 4.38E-01 | 1.20  | 1.15E-01 |
| OR2V2      | 1.19 | 1.18E-01 | 1.09  | 1.37E-01 | -0.38 | 6.49E-01 |
| C11orf45   | 1.19 | 1.18E-01 | 0.53  | 2.98E-01 | 0.43  | 3.34E-01 |
| SLC35E2    | 1.19 | 1.18E-01 | 0.91  | 1.81E-01 | 0.16  | 4.36E-01 |
| TTBK1      | 1.19 | 1.18E-01 | -1.06 | 8.55E-01 | 1.86  | 3.17E-02 |



|          |      |          |       |          |       |          |
|----------|------|----------|-------|----------|-------|----------|
| SDC3     | 1.19 | 1.18E-01 | 0.19  | 4.24E-01 | 0.56  | 2.86E-01 |
| NAALADL2 | 1.19 | 1.18E-01 | 1.50  | 6.71E-02 | 1.50  | 6.73E-02 |
| SLC22A15 | 1.19 | 1.18E-01 | 0.34  | 3.66E-01 | 0.30  | 3.81E-01 |
| CDK11B   | 1.19 | 1.18E-01 | 1.43  | 7.70E-02 | -0.64 | 7.39E-01 |
| RCAN3    | 1.18 | 1.18E-01 | -0.21 | 5.84E-01 | 1.46  | 7.24E-02 |
| C1QTNF4  | 1.18 | 1.18E-01 | 0.83  | 2.03E-01 | 0.53  | 3.00E-01 |
| ZBTB7A   | 1.18 | 1.18E-01 | -1.87 | 9.70E-01 | 2.67  | 3.76E-03 |
| FAM154B  | 1.18 | 1.18E-01 | -0.49 | 6.89E-01 | 1.22  | 1.12E-01 |
| MYLPF    | 1.18 | 1.18E-01 | 0.87  | 1.92E-01 | 0.53  | 3.00E-01 |
| CIDEA    | 1.18 | 1.18E-01 | -0.55 | 7.08E-01 | 1.35  | 8.81E-02 |
| HSPA4L   | 1.18 | 1.18E-01 | 1.06  | 1.44E-01 | 0.26  | 3.99E-01 |
| PSPH     | 1.18 | 1.18E-01 | 1.29  | 9.83E-02 | 1.23  | 1.10E-01 |
| C19orf60 | 1.18 | 1.18E-01 | 2.22  | 1.34E-02 | -0.95 | 8.30E-01 |
| TPTE2    | 1.18 | 1.18E-01 | 1.21  | 1.12E-01 | 0.47  | 3.20E-01 |
| NAIP     | 1.18 | 1.19E-01 | 1.95  | 2.55E-02 | -0.80 | 7.89E-01 |
| SLC38A8  | 1.18 | 1.19E-01 | -0.40 | 6.55E-01 | 1.45  | 7.40E-02 |
| UBALD2   | 1.18 | 1.19E-01 | 1.24  | 1.07E-01 | 0.55  | 2.91E-01 |
| GPS2     | 1.18 | 1.19E-01 | 1.14  | 1.28E-01 | -0.36 | 6.39E-01 |
| EPB41    | 1.18 | 1.19E-01 | 0.14  | 4.43E-01 | 0.26  | 3.96E-01 |
| IGF2BP3  | 1.18 | 1.19E-01 | 1.03  | 1.52E-01 | 0.42  | 3.38E-01 |
| XPR1     | 1.18 | 1.19E-01 | 0.90  | 1.85E-01 | 1.61  | 5.32E-02 |
| SALL3    | 1.18 | 1.19E-01 | -0.28 | 6.10E-01 | 1.28  | 1.00E-01 |
| DHFRL1   | 1.18 | 1.19E-01 | 0.32  | 3.73E-01 | 0.25  | 4.02E-01 |
| CASP5    | 1.18 | 1.19E-01 | -0.15 | 5.58E-01 | 0.52  | 3.02E-01 |
| RRP1     | 1.18 | 1.19E-01 | 0.00  | 4.98E-01 | 1.40  | 8.03E-02 |
| SIGMAR1  | 1.18 | 1.19E-01 | 1.25  | 1.05E-01 | 0.81  | 2.09E-01 |
| DNASE2B  | 1.18 | 1.19E-01 | -0.02 | 5.10E-01 | 1.21  | 1.14E-01 |
| BAG5     | 1.18 | 1.19E-01 | -0.18 | 5.70E-01 | 1.62  | 5.30E-02 |
| ORM2     | 1.18 | 1.19E-01 | 0.86  | 1.96E-01 | 0.11  | 4.57E-01 |
| CRLF1    | 1.18 | 1.19E-01 | 2.21  | 1.36E-02 | -0.73 | 7.66E-01 |
| EYA2     | 1.18 | 1.19E-01 | 1.61  | 5.37E-02 | 0.11  | 4.54E-01 |

|                |      |          |       |          |       |          |
|----------------|------|----------|-------|----------|-------|----------|
| PROSER2        | 1.18 | 1.20E-01 | 1.21  | 1.13E-01 | -0.89 | 8.13E-01 |
| KIAA0907       | 1.18 | 1.20E-01 | 1.26  | 1.04E-01 | -0.13 | 5.53E-01 |
| MOV10          | 1.18 | 1.20E-01 | 1.48  | 6.91E-02 | -0.84 | 7.99E-01 |
| IDH1           | 1.18 | 1.20E-01 | 1.46  | 7.19E-02 | -0.38 | 6.49E-01 |
| GPR52          | 1.18 | 1.20E-01 | 0.88  | 1.90E-01 | 0.49  | 3.11E-01 |
| U2AF1          | 1.18 | 1.20E-01 | -0.84 | 7.99E-01 | 1.55  | 6.09E-02 |
| B3GALT2        | 1.18 | 1.20E-01 | 0.23  | 4.10E-01 | 2.47  | 6.77E-03 |
| TNNT1          | 1.18 | 1.20E-01 | 1.30  | 9.69E-02 | -0.38 | 6.47E-01 |
| TTI1           | 1.18 | 1.20E-01 | 0.83  | 2.03E-01 | -0.40 | 6.57E-01 |
| VPS8           | 1.18 | 1.20E-01 | 0.69  | 2.44E-01 | -0.18 | 5.71E-01 |
| OR6C65         | 1.18 | 1.20E-01 | 0.13  | 4.50E-01 | 1.34  | 8.94E-02 |
| LCE1C          | 1.18 | 1.20E-01 | -0.29 | 6.16E-01 | 1.45  | 7.31E-02 |
| FMNL3          | 1.18 | 1.20E-01 | 1.04  | 1.50E-01 | 0.11  | 4.56E-01 |
| KLHL42         | 1.18 | 1.20E-01 | 0.04  | 4.82E-01 | 0.41  | 3.40E-01 |
| TNRC18         | 1.18 | 1.20E-01 | 0.26  | 3.98E-01 | 1.02  | 1.54E-01 |
| POLR2M         | 1.17 | 1.20E-01 | -0.21 | 5.82E-01 | 1.60  | 5.50E-02 |
| COL27A1        | 1.17 | 1.20E-01 | 0.57  | 2.83E-01 | -0.87 | 8.09E-01 |
| SBK1           | 1.17 | 1.20E-01 | -0.90 | 8.16E-01 | 1.98  | 2.38E-02 |
| RXFP1          | 1.17 | 1.20E-01 | 0.79  | 2.15E-01 | -0.27 | 6.07E-01 |
| VWA5A          | 1.17 | 1.20E-01 | 2.45  | 7.17E-03 | -0.98 | 8.37E-01 |
| SOHLH2         | 1.17 | 1.20E-01 | 2.15  | 1.58E-02 | -0.95 | 8.30E-01 |
| CCDC169-SOHLH2 | 1.17 | 1.20E-01 | 2.15  | 1.58E-02 | -0.95 | 8.30E-01 |
| MYLK2          | 1.17 | 1.20E-01 | -1.03 | 8.49E-01 | 2.33  | 9.80E-03 |
| KLHL12         | 1.17 | 1.20E-01 | -0.56 | 7.13E-01 | 1.10  | 1.36E-01 |
| WNT16          | 1.17 | 1.20E-01 | -0.33 | 6.30E-01 | 0.99  | 1.60E-01 |
| DTX4           | 1.17 | 1.21E-01 | 1.38  | 8.40E-02 | -0.71 | 7.62E-01 |
| THUMPD3        | 1.17 | 1.21E-01 | 0.94  | 1.74E-01 | 0.62  | 2.69E-01 |
| ITGAL          | 1.17 | 1.21E-01 | 1.44  | 7.53E-02 | -1.47 | 9.29E-01 |
| SLC17A4        | 1.17 | 1.21E-01 | 0.82  | 2.05E-01 | -0.15 | 5.58E-01 |
| NKIRAS2        | 1.17 | 1.21E-01 | 0.82  | 2.06E-01 | 0.27  | 3.94E-01 |
| CCR5           | 1.17 | 1.21E-01 | 2.05  | 2.04E-02 | -0.28 | 6.12E-01 |

|               |      |          |       |          |       |          |
|---------------|------|----------|-------|----------|-------|----------|
| RDH16         | 1.17 | 1.21E-01 | -1.09 | 8.63E-01 | 1.83  | 3.38E-02 |
| RP11-111M22.2 | 1.17 | 1.21E-01 | 0.51  | 3.04E-01 | 0.68  | 2.49E-01 |
| OR11L1        | 1.17 | 1.21E-01 | 1.26  | 1.04E-01 | -0.26 | 6.03E-01 |
| MANEAL        | 1.17 | 1.21E-01 | -0.98 | 8.37E-01 | 1.56  | 5.97E-02 |
| C7orf60       | 1.17 | 1.21E-01 | 1.54  | 6.18E-02 | -0.20 | 5.79E-01 |
| CELF1         | 1.17 | 1.21E-01 | 1.94  | 2.65E-02 | 0.26  | 3.96E-01 |
| SEC62         | 1.17 | 1.21E-01 | 0.84  | 2.01E-01 | 0.31  | 3.78E-01 |
| FOXN3         | 1.17 | 1.21E-01 | 0.39  | 3.48E-01 | 0.71  | 2.39E-01 |
| KCNIP3        | 1.17 | 1.21E-01 | 0.40  | 3.43E-01 | 0.74  | 2.28E-01 |
| CCR7          | 1.17 | 1.21E-01 | 1.59  | 5.58E-02 | -0.13 | 5.50E-01 |
| COBL          | 1.17 | 1.21E-01 | 0.16  | 4.35E-01 | 0.96  | 1.69E-01 |
| RAX2          | 1.17 | 1.21E-01 | -0.47 | 6.80E-01 | 1.04  | 1.49E-01 |
| PLEKHO1       | 1.17 | 1.21E-01 | 0.93  | 1.77E-01 | -0.02 | 5.06E-01 |
| DYRK3         | 1.17 | 1.21E-01 | 1.89  | 2.96E-02 | -2.33 | 9.90E-01 |
| NHP2          | 1.17 | 1.22E-01 | 0.84  | 1.99E-01 | -0.06 | 5.23E-01 |
| ATP9B         | 1.17 | 1.22E-01 | 1.56  | 5.89E-02 | 0.18  | 4.30E-01 |
| NAGS          | 1.17 | 1.22E-01 | 1.39  | 8.27E-02 | -1.17 | 8.79E-01 |
| GNL3          | 1.17 | 1.22E-01 | 0.67  | 2.51E-01 | 0.30  | 3.84E-01 |
| TRA2B         | 1.17 | 1.22E-01 | 0.76  | 2.22E-01 | 1.19  | 1.17E-01 |
| ASPDH         | 1.17 | 1.22E-01 | 1.77  | 3.85E-02 | -0.38 | 6.49E-01 |
| ABCB9         | 1.17 | 1.22E-01 | 0.67  | 2.50E-01 | 0.01  | 4.94E-01 |
| DOK1          | 1.17 | 1.22E-01 | 0.46  | 3.24E-01 | 0.51  | 3.06E-01 |
| HOXC11        | 1.17 | 1.22E-01 | -0.58 | 7.21E-01 | 1.37  | 8.53E-02 |
| SH3TC1        | 1.17 | 1.22E-01 | 1.63  | 5.11E-02 | -0.06 | 5.25E-01 |
| GBA           | 1.17 | 1.22E-01 | 0.27  | 3.95E-01 | 0.63  | 2.66E-01 |
| SLC2A1        | 1.17 | 1.22E-01 | 0.33  | 3.71E-01 | 0.73  | 2.32E-01 |
| PLEKHD1       | 1.17 | 1.22E-01 | 0.49  | 3.11E-01 | 0.71  | 2.39E-01 |
| CYP2E1        | 1.16 | 1.22E-01 | 1.74  | 4.06E-02 | -0.68 | 7.51E-01 |
| TMEM232       | 1.16 | 1.22E-01 | -0.88 | 8.10E-01 | 2.37  | 8.90E-03 |
| ANK2          | 1.16 | 1.22E-01 | 0.32  | 3.74E-01 | 0.40  | 3.45E-01 |
| MATN2         | 1.16 | 1.22E-01 | 2.70  | 3.48E-03 | -0.55 | 7.09E-01 |

|                |      |          |       |          |       |          |
|----------------|------|----------|-------|----------|-------|----------|
| KMT2A          | 1.16 | 1.22E-01 | 0.47  | 3.19E-01 | 0.50  | 3.10E-01 |
| WASF2          | 1.16 | 1.23E-01 | 0.07  | 4.71E-01 | 0.93  | 1.76E-01 |
| LRP10          | 1.16 | 1.23E-01 | 0.80  | 2.10E-01 | 0.30  | 3.81E-01 |
| CHST9          | 1.16 | 1.23E-01 | 2.61  | 4.57E-03 | -0.83 | 7.97E-01 |
| SCNM1          | 1.16 | 1.23E-01 | 0.48  | 3.15E-01 | -0.46 | 6.76E-01 |
| SLIT1          | 1.16 | 1.23E-01 | 0.84  | 2.00E-01 | 0.19  | 4.23E-01 |
| RP11-664D7.4   | 1.16 | 1.23E-01 | 1.25  | 1.06E-01 | 0.39  | 3.48E-01 |
| C21orf49       | 1.16 | 1.23E-01 | 0.27  | 3.94E-01 | 1.15  | 1.26E-01 |
| BTRC           | 1.16 | 1.23E-01 | 0.58  | 2.80E-01 | 0.29  | 3.86E-01 |
| AC003101.1     | 1.16 | 1.23E-01 | 0.85  | 1.98E-01 | 0.05  | 4.79E-01 |
| SPHAR          | 1.16 | 1.23E-01 | -0.11 | 5.46E-01 | 1.09  | 1.37E-01 |
| OR2G6          | 1.16 | 1.23E-01 | 0.37  | 3.55E-01 | 0.69  | 2.45E-01 |
| EEF1E1-BLOC1S5 | 1.16 | 1.23E-01 | 2.16  | 1.56E-02 | 0.10  | 4.61E-01 |
| RASGEF1C       | 1.16 | 1.23E-01 | 2.42  | 7.86E-03 | -1.97 | 9.75E-01 |
| MAN1A1         | 1.16 | 1.23E-01 | -0.09 | 5.35E-01 | 0.47  | 3.19E-01 |
| KRT82          | 1.16 | 1.23E-01 | -0.47 | 6.82E-01 | 1.02  | 1.53E-01 |
| NCSTN          | 1.16 | 1.23E-01 | 0.86  | 1.94E-01 | 0.42  | 3.38E-01 |
| ZBTB14         | 1.16 | 1.23E-01 | 0.35  | 3.63E-01 | 0.42  | 3.39E-01 |
| MAP2K6         | 1.16 | 1.24E-01 | 0.67  | 2.52E-01 | -0.08 | 5.33E-01 |
| CNRIP1         | 1.16 | 1.24E-01 | 1.17  | 1.20E-01 | -1.01 | 8.43E-01 |
| ACCS           | 1.16 | 1.24E-01 | 2.18  | 1.45E-02 | -0.15 | 5.58E-01 |
| ILDR2          | 1.16 | 1.24E-01 | 1.26  | 1.04E-01 | -1.11 | 8.66E-01 |
| ZFP14          | 1.16 | 1.24E-01 | 1.58  | 5.66E-02 | 0.86  | 1.95E-01 |
| VEGFA          | 1.16 | 1.24E-01 | -1.55 | 9.39E-01 | 2.22  | 1.32E-02 |
| WDR16          | 1.16 | 1.24E-01 | 1.48  | 6.93E-02 | 0.96  | 1.68E-01 |
| C12orf36       | 1.16 | 1.24E-01 | 0.10  | 4.58E-01 | 1.64  | 5.06E-02 |
| RRAGD          | 1.16 | 1.24E-01 | -0.34 | 6.33E-01 | 0.64  | 2.60E-01 |
| MMP16          | 1.16 | 1.24E-01 | 0.46  | 3.23E-01 | -1.18 | 8.82E-01 |
| STAT4          | 1.16 | 1.24E-01 | -0.11 | 5.44E-01 | 1.88  | 2.99E-02 |
| DPP8           | 1.16 | 1.24E-01 | 2.29  | 1.11E-02 | -0.07 | 5.30E-01 |
| ZNF19          | 1.15 | 1.24E-01 | -0.81 | 7.91E-01 | 1.72  | 4.26E-02 |

|          |      |          |       |          |       |          |
|----------|------|----------|-------|----------|-------|----------|
| DTNB     | 1.15 | 1.24E-01 | 0.70  | 2.42E-01 | 0.94  | 1.74E-01 |
| HPSE     | 1.15 | 1.24E-01 | 2.76  | 2.93E-03 | 0.29  | 3.84E-01 |
| TUBAL3   | 1.15 | 1.24E-01 | 0.90  | 1.83E-01 | -0.71 | 7.61E-01 |
| SSBP4    | 1.15 | 1.24E-01 | -0.13 | 5.52E-01 | 1.19  | 1.16E-01 |
| NPY1R    | 1.15 | 1.24E-01 | 0.69  | 2.45E-01 | 0.62  | 2.66E-01 |
| WFDC11   | 1.15 | 1.24E-01 | 0.60  | 2.73E-01 | 0.19  | 4.24E-01 |
| PPP1R36  | 1.15 | 1.25E-01 | 0.61  | 2.73E-01 | 0.61  | 2.72E-01 |
| PSME3    | 1.15 | 1.25E-01 | 0.27  | 3.92E-01 | 0.71  | 2.39E-01 |
| NUP160   | 1.15 | 1.25E-01 | 1.84  | 3.30E-02 | -0.76 | 7.77E-01 |
| RPS11    | 1.15 | 1.25E-01 | 0.25  | 4.03E-01 | 1.13  | 1.30E-01 |
| ARL15    | 1.15 | 1.25E-01 | 0.73  | 2.32E-01 | 0.07  | 4.71E-01 |
| CITED2   | 1.15 | 1.25E-01 | 1.97  | 2.46E-02 | 0.53  | 2.98E-01 |
| USP46    | 1.15 | 1.25E-01 | 0.09  | 4.64E-01 | 0.88  | 1.88E-01 |
| TTC39C   | 1.15 | 1.25E-01 | 1.68  | 4.65E-02 | 1.75  | 4.02E-02 |
| DUSP12   | 1.15 | 1.25E-01 | 0.55  | 2.92E-01 | 0.06  | 4.75E-01 |
| CPEB1    | 1.15 | 1.25E-01 | 1.07  | 1.42E-01 | 1.50  | 6.64E-02 |
| MAPKAPK3 | 1.15 | 1.25E-01 | 0.77  | 2.19E-01 | 0.04  | 4.84E-01 |
| ODF3     | 1.15 | 1.25E-01 | 1.51  | 6.57E-02 | -0.45 | 6.74E-01 |
| NKX2-3   | 1.15 | 1.25E-01 | 1.27  | 1.02E-01 | 0.32  | 3.76E-01 |
| RPP38    | 1.15 | 1.25E-01 | 0.75  | 2.27E-01 | -0.65 | 7.42E-01 |
| NCF4     | 1.15 | 1.26E-01 | -0.48 | 6.83E-01 | 1.53  | 6.33E-02 |
| FAM177A1 | 1.15 | 1.26E-01 | 0.31  | 3.77E-01 | 0.74  | 2.29E-01 |
| GIN1     | 1.15 | 1.26E-01 | 0.50  | 3.07E-01 | 0.65  | 2.58E-01 |
| PPP2R3A  | 1.15 | 1.26E-01 | 2.33  | 9.97E-03 | -1.21 | 8.87E-01 |
| MYADML2  | 1.15 | 1.26E-01 | 2.23  | 1.30E-02 | -0.50 | 6.93E-01 |
| SPDYE1   | 1.15 | 1.26E-01 | -0.15 | 5.60E-01 | 1.46  | 7.17E-02 |
| NPHS2    | 1.15 | 1.26E-01 | 0.36  | 3.61E-01 | 0.57  | 2.83E-01 |
| NOS2     | 1.15 | 1.26E-01 | -0.09 | 5.37E-01 | 2.44  | 7.43E-03 |
| DMRTB1   | 1.15 | 1.26E-01 | 0.48  | 3.16E-01 | 0.95  | 1.71E-01 |
| CCR9     | 1.15 | 1.26E-01 | -0.01 | 5.02E-01 | 0.60  | 2.73E-01 |
| WT1      | 1.15 | 1.26E-01 | -0.18 | 5.70E-01 | 1.35  | 8.78E-02 |

|          |      |          |       |          |       |          |
|----------|------|----------|-------|----------|-------|----------|
| C11orf21 | 1.15 | 1.26E-01 | 0.80  | 2.13E-01 | -0.52 | 6.99E-01 |
| RPLP1    | 1.15 | 1.26E-01 | 1.35  | 8.82E-02 | 0.25  | 4.01E-01 |
| EML1     | 1.14 | 1.26E-01 | 0.93  | 1.77E-01 | -0.93 | 8.24E-01 |
| SP1      | 1.14 | 1.26E-01 | -0.05 | 5.19E-01 | 1.01  | 1.56E-01 |
| BLOC1S2  | 1.14 | 1.26E-01 | 0.66  | 2.56E-01 | 0.35  | 3.65E-01 |
| CGN      | 1.14 | 1.26E-01 | 0.81  | 2.08E-01 | 0.52  | 3.03E-01 |
| CRLS1    | 1.14 | 1.27E-01 | 0.86  | 1.94E-01 | 0.52  | 3.03E-01 |
| RNPEP    | 1.14 | 1.27E-01 | 0.02  | 4.92E-01 | 0.62  | 2.67E-01 |
| KHDRBS2  | 1.14 | 1.27E-01 | -0.36 | 6.41E-01 | 1.51  | 6.60E-02 |
| IFI27L2  | 1.14 | 1.27E-01 | -1.19 | 8.84E-01 | 1.98  | 2.40E-02 |
| MSLN     | 1.14 | 1.27E-01 | 1.10  | 1.35E-01 | -0.21 | 5.82E-01 |
| KCNK13   | 1.14 | 1.27E-01 | 0.23  | 4.08E-01 | -0.35 | 6.37E-01 |
| RPS26    | 1.14 | 1.27E-01 | 1.13  | 1.29E-01 | 1.96  | 2.50E-02 |
| WASF3    | 1.14 | 1.27E-01 | 0.81  | 2.10E-01 | 0.91  | 1.83E-01 |
| IGSF3    | 1.14 | 1.27E-01 | 0.38  | 3.54E-01 | 0.17  | 4.33E-01 |
| NUP214   | 1.14 | 1.27E-01 | 1.39  | 8.28E-02 | -0.81 | 7.90E-01 |
| TRIM4    | 1.14 | 1.27E-01 | 1.53  | 6.35E-02 | -0.78 | 7.82E-01 |
| GLTSCR1L | 1.14 | 1.27E-01 | -0.74 | 7.69E-01 | 1.71  | 4.37E-02 |
| PSEN1    | 1.14 | 1.27E-01 | 0.91  | 1.82E-01 | 0.42  | 3.36E-01 |
| ZNF66    | 1.14 | 1.27E-01 | 0.39  | 3.49E-01 | 0.34  | 3.66E-01 |
| AP1G1    | 1.14 | 1.27E-01 | -0.09 | 5.35E-01 | 1.62  | 5.25E-02 |
| VRK1     | 1.14 | 1.27E-01 | 1.36  | 8.74E-02 | 0.59  | 2.77E-01 |
| KANSL1   | 1.14 | 1.27E-01 | 1.76  | 3.94E-02 | -1.20 | 8.84E-01 |
| PDXDC1   | 1.14 | 1.27E-01 | 1.55  | 6.04E-02 | -0.16 | 5.63E-01 |
| GFRA1    | 1.14 | 1.27E-01 | 2.07  | 1.94E-02 | -1.37 | 9.14E-01 |
| SDIM1    | 1.14 | 1.27E-01 | 0.21  | 4.17E-01 | 0.90  | 1.85E-01 |
| EIF3A    | 1.14 | 1.28E-01 | -0.48 | 6.84E-01 | 1.28  | 9.99E-02 |
| CTSH     | 1.14 | 1.28E-01 | 0.76  | 2.24E-01 | 0.44  | 3.30E-01 |
| ABCA4    | 1.14 | 1.28E-01 | -0.78 | 7.83E-01 | 1.34  | 8.96E-02 |
| GRINA    | 1.14 | 1.28E-01 | 2.33  | 9.81E-03 | -0.65 | 7.43E-01 |
| RAD51AP2 | 1.14 | 1.28E-01 | -1.43 | 9.23E-01 | 2.11  | 1.73E-02 |

|          |      |          |       |          |       |          |
|----------|------|----------|-------|----------|-------|----------|
| PRPF31   | 1.14 | 1.28E-01 | 0.27  | 3.93E-01 | -0.12 | 5.47E-01 |
| NPAS3    | 1.14 | 1.28E-01 | 0.67  | 2.50E-01 | 1.92  | 2.76E-02 |
| TRERF1   | 1.14 | 1.28E-01 | -0.15 | 5.58E-01 | 0.98  | 1.64E-01 |
| NSG1     | 1.14 | 1.28E-01 | -0.48 | 6.84E-01 | 0.44  | 3.29E-01 |
| MTHFD1L  | 1.14 | 1.28E-01 | 1.23  | 1.10E-01 | -0.53 | 7.01E-01 |
| MLXIP    | 1.14 | 1.28E-01 | 1.26  | 1.04E-01 | -0.40 | 6.56E-01 |
| MTRNR2L4 | 1.14 | 1.28E-01 | -0.03 | 5.10E-01 | 1.00  | 1.59E-01 |
| GNAI2    | 1.14 | 1.28E-01 | 2.76  | 2.87E-03 | -0.60 | 7.25E-01 |
| MGST1    | 1.14 | 1.28E-01 | 1.19  | 1.17E-01 | -0.82 | 7.93E-01 |
| PYGB     | 1.14 | 1.28E-01 | 0.19  | 4.25E-01 | 1.01  | 1.56E-01 |
| NR1H3    | 1.14 | 1.28E-01 | 0.63  | 2.66E-01 | 0.85  | 1.97E-01 |
| NEURL1B  | 1.14 | 1.28E-01 | 0.01  | 4.97E-01 | 0.37  | 3.55E-01 |
| SLC52A3  | 1.14 | 1.28E-01 | -0.50 | 6.90E-01 | 1.57  | 5.78E-02 |
| PROM2    | 1.14 | 1.28E-01 | 0.67  | 2.50E-01 | 0.59  | 2.76E-01 |
| SERINC2  | 1.13 | 1.28E-01 | -0.20 | 5.80E-01 | 0.76  | 2.23E-01 |
| AKAP8    | 1.13 | 1.28E-01 | 2.15  | 1.57E-02 | -0.51 | 6.96E-01 |
| SLC30A6  | 1.13 | 1.28E-01 | -0.65 | 7.41E-01 | 1.59  | 5.58E-02 |
| SCGB1D1  | 1.13 | 1.28E-01 | 1.66  | 4.88E-02 | -0.89 | 8.12E-01 |
| CTSW     | 1.13 | 1.28E-01 | 1.22  | 1.12E-01 | -0.37 | 6.44E-01 |
| TACC1    | 1.13 | 1.29E-01 | 1.10  | 1.36E-01 | 0.23  | 4.07E-01 |
| PPIH     | 1.13 | 1.29E-01 | -0.06 | 5.22E-01 | 0.43  | 3.33E-01 |
| RCE1     | 1.13 | 1.29E-01 | 1.33  | 9.14E-02 | 0.11  | 4.55E-01 |
| TMEM176A | 1.13 | 1.29E-01 | -0.39 | 6.50E-01 | 0.82  | 2.06E-01 |
| LRRFIP2  | 1.13 | 1.29E-01 | 0.33  | 3.71E-01 | 0.68  | 2.49E-01 |
| TYRO3    | 1.13 | 1.29E-01 | 1.02  | 1.53E-01 | -0.45 | 6.74E-01 |
| RAX      | 1.13 | 1.29E-01 | 2.50  | 6.24E-03 | -0.33 | 6.31E-01 |
| PSKH2    | 1.13 | 1.29E-01 | 0.33  | 3.72E-01 | 0.11  | 4.56E-01 |
| KIAA1324 | 1.13 | 1.29E-01 | -0.51 | 6.96E-01 | 1.09  | 1.38E-01 |
| RALYL    | 1.13 | 1.29E-01 | 0.30  | 3.84E-01 | 0.22  | 4.12E-01 |
| PRSS54   | 1.13 | 1.29E-01 | 0.67  | 2.52E-01 | 0.63  | 2.65E-01 |
| SALL2    | 1.13 | 1.29E-01 | 0.48  | 3.17E-01 | 0.29  | 3.86E-01 |

|               |      |          |       |          |       |          |
|---------------|------|----------|-------|----------|-------|----------|
| THEMIS        | 1.13 | 1.29E-01 | 0.03  | 4.90E-01 | 0.23  | 4.08E-01 |
| ZNF501        | 1.13 | 1.29E-01 | 1.03  | 1.52E-01 | -0.35 | 6.36E-01 |
| ARL3          | 1.13 | 1.29E-01 | 1.42  | 7.76E-02 | 0.79  | 2.15E-01 |
| TAS2R20       | 1.13 | 1.29E-01 | -0.69 | 7.56E-01 | 1.39  | 8.23E-02 |
| CDH23         | 1.13 | 1.29E-01 | 2.08  | 1.90E-02 | -0.35 | 6.35E-01 |
| KIFC1         | 1.13 | 1.29E-01 | 1.06  | 1.45E-01 | -0.37 | 6.45E-01 |
| WDR61         | 1.13 | 1.29E-01 | -0.20 | 5.79E-01 | 2.67  | 3.83E-03 |
| RP11-552I14.1 | 1.13 | 1.29E-01 | -0.06 | 5.22E-01 | 1.25  | 1.05E-01 |
| RP11-463J10.2 | 1.13 | 1.29E-01 | 1.49  | 6.76E-02 | -0.55 | 7.10E-01 |
| KRT19         | 1.13 | 1.29E-01 | 0.88  | 1.90E-01 | 0.03  | 4.89E-01 |
| METTL7B       | 1.13 | 1.29E-01 | 2.54  | 5.59E-03 | -1.37 | 9.14E-01 |
| MAF           | 1.13 | 1.29E-01 | -0.79 | 7.84E-01 | 1.16  | 1.24E-01 |
| OR5K2         | 1.13 | 1.30E-01 | 0.05  | 4.79E-01 | 1.08  | 1.39E-01 |
| PLCB2         | 1.13 | 1.30E-01 | 0.00  | 5.01E-01 | 1.11  | 1.34E-01 |
| AL590708.2    | 1.13 | 1.30E-01 | 1.20  | 1.14E-01 | 0.01  | 4.97E-01 |
| TTLL1         | 1.13 | 1.30E-01 | 0.33  | 3.69E-01 | 1.50  | 6.68E-02 |
| SLC6A13       | 1.13 | 1.30E-01 | 1.17  | 1.20E-01 | -0.12 | 5.49E-01 |
| DMRT2         | 1.13 | 1.30E-01 | 1.18  | 1.19E-01 | 0.28  | 3.91E-01 |
| PRRC2C        | 1.13 | 1.30E-01 | 0.27  | 3.93E-01 | 0.37  | 3.56E-01 |
| IGFLR1        | 1.13 | 1.30E-01 | -0.94 | 8.27E-01 | 2.03  | 2.12E-02 |
| EEF1D         | 1.13 | 1.30E-01 | 0.70  | 2.43E-01 | 0.69  | 2.45E-01 |
| EID3          | 1.13 | 1.30E-01 | 0.42  | 3.39E-01 | 1.02  | 1.53E-01 |
| HSPA8         | 1.13 | 1.30E-01 | 0.59  | 2.79E-01 | 0.68  | 2.47E-01 |
| MDN1          | 1.13 | 1.30E-01 | -0.21 | 5.85E-01 | 1.06  | 1.45E-01 |
| MRM1          | 1.12 | 1.30E-01 | 0.57  | 2.84E-01 | 0.43  | 3.35E-01 |
| CSMD1         | 1.12 | 1.30E-01 | 1.22  | 1.12E-01 | -0.34 | 6.35E-01 |
| ATF7IP        | 1.12 | 1.30E-01 | -0.56 | 7.11E-01 | 2.57  | 5.06E-03 |
| RGS9BP        | 1.12 | 1.31E-01 | 1.48  | 6.94E-02 | 0.96  | 1.68E-01 |
| ITGB1BP1      | 1.12 | 1.31E-01 | 0.00  | 5.01E-01 | 1.48  | 7.00E-02 |
| CCAR2         | 1.12 | 1.31E-01 | -0.75 | 7.74E-01 | 1.41  | 7.98E-02 |
| SLC18A3       | 1.12 | 1.31E-01 | 1.20  | 1.15E-01 | -0.49 | 6.89E-01 |



|         |      |          |       |          |       |          |
|---------|------|----------|-------|----------|-------|----------|
| THSD7B  | 1.12 | 1.31E-01 | 0.84  | 2.02E-01 | 1.42  | 7.80E-02 |
| BOLL    | 1.12 | 1.31E-01 | 0.59  | 2.77E-01 | 0.60  | 2.73E-01 |
| OR6C2   | 1.12 | 1.31E-01 | 0.08  | 4.68E-01 | 1.33  | 9.17E-02 |
| ARFIP1  | 1.12 | 1.31E-01 | -0.10 | 5.41E-01 | 0.56  | 2.87E-01 |
| MPP4    | 1.12 | 1.31E-01 | 1.02  | 1.54E-01 | -0.42 | 6.62E-01 |
| MEX3C   | 1.12 | 1.31E-01 | -0.72 | 7.65E-01 | 1.39  | 8.26E-02 |
| ST3GAL3 | 1.12 | 1.31E-01 | 2.09  | 1.82E-02 | -1.16 | 8.77E-01 |
| EFHD1   | 1.12 | 1.31E-01 | 0.99  | 1.61E-01 | 0.09  | 4.63E-01 |
| KRT5    | 1.12 | 1.31E-01 | -0.32 | 6.24E-01 | 0.94  | 1.75E-01 |
| ESPN    | 1.12 | 1.31E-01 | 2.16  | 1.52E-02 | -1.24 | 8.92E-01 |
| CRIPAK  | 1.12 | 1.31E-01 | -0.10 | 5.41E-01 | 1.63  | 5.20E-02 |
| ADAM2   | 1.12 | 1.31E-01 | -0.36 | 6.41E-01 | 0.75  | 2.27E-01 |
| OR2C1   | 1.12 | 1.32E-01 | 0.26  | 3.98E-01 | 0.49  | 3.12E-01 |
| ITGB8   | 1.12 | 1.32E-01 | -0.59 | 7.21E-01 | 1.55  | 6.04E-02 |
| PKHD1   | 1.12 | 1.32E-01 | -0.39 | 6.52E-01 | 0.95  | 1.71E-01 |
| IMPACT  | 1.12 | 1.32E-01 | -0.70 | 7.58E-01 | 1.97  | 2.43E-02 |
| DYRK4   | 1.12 | 1.32E-01 | 0.80  | 2.12E-01 | 0.55  | 2.92E-01 |
| SFT2D3  | 1.12 | 1.32E-01 | -0.78 | 7.83E-01 | 1.36  | 8.73E-02 |
| THAP3   | 1.12 | 1.32E-01 | 1.48  | 6.88E-02 | 0.24  | 4.04E-01 |
| SLC4A8  | 1.12 | 1.32E-01 | 0.76  | 2.22E-01 | 0.25  | 4.01E-01 |
| WNT3    | 1.12 | 1.32E-01 | 1.16  | 1.23E-01 | -0.53 | 7.03E-01 |
| CYB561  | 1.12 | 1.32E-01 | -0.38 | 6.50E-01 | 1.33  | 9.11E-02 |
| SCN11A  | 1.12 | 1.32E-01 | 0.06  | 4.75E-01 | 0.42  | 3.36E-01 |
| DIDO1   | 1.11 | 1.33E-01 | 1.83  | 3.39E-02 | -0.10 | 5.40E-01 |
| SDCCAG3 | 1.11 | 1.33E-01 | 0.18  | 4.27E-01 | 0.24  | 4.04E-01 |
| SHISA9  | 1.11 | 1.33E-01 | 0.08  | 4.68E-01 | 1.25  | 1.06E-01 |
| OSBPL8  | 1.11 | 1.33E-01 | -0.80 | 7.88E-01 | 1.45  | 7.35E-02 |
| RASGRP2 | 1.11 | 1.33E-01 | -0.43 | 6.66E-01 | 1.32  | 9.27E-02 |
| NUCB2   | 1.11 | 1.33E-01 | 0.55  | 2.91E-01 | 0.85  | 1.97E-01 |
| TP53BP1 | 1.11 | 1.33E-01 | 1.07  | 1.43E-01 | 1.24  | 1.08E-01 |
| BCL2L10 | 1.11 | 1.33E-01 | 1.67  | 4.74E-02 | -1.41 | 9.20E-01 |

|          |      |          |       |          |       |          |
|----------|------|----------|-------|----------|-------|----------|
| OR5B3    | 1.11 | 1.33E-01 | 1.27  | 1.02E-01 | 0.05  | 4.80E-01 |
| PSENN    | 1.11 | 1.33E-01 | -0.01 | 5.03E-01 | 1.33  | 9.24E-02 |
| RNASE10  | 1.11 | 1.33E-01 | 0.95  | 1.72E-01 | -0.16 | 5.65E-01 |
| BCAR1    | 1.11 | 1.33E-01 | -0.65 | 7.41E-01 | 1.40  | 8.05E-02 |
| IRF6     | 1.11 | 1.33E-01 | -0.29 | 6.14E-01 | 1.12  | 1.31E-01 |
| HNF4G    | 1.11 | 1.33E-01 | -1.12 | 8.69E-01 | 2.33  | 9.89E-03 |
| RSAD1    | 1.11 | 1.33E-01 | 1.79  | 3.65E-02 | -1.68 | 9.53E-01 |
| TPSD1    | 1.11 | 1.33E-01 | 0.58  | 2.79E-01 | 0.40  | 3.46E-01 |
| SLC11A1  | 1.11 | 1.33E-01 | 1.44  | 7.54E-02 | -1.07 | 8.58E-01 |
| CHRN3    | 1.11 | 1.33E-01 | -0.11 | 5.44E-01 | 1.38  | 8.36E-02 |
| AP2A2    | 1.11 | 1.33E-01 | 0.24  | 4.04E-01 | 0.92  | 1.78E-01 |
| PEX6     | 1.11 | 1.33E-01 | 0.78  | 2.19E-01 | 0.18  | 4.27E-01 |
| C3orf20  | 1.11 | 1.33E-01 | 0.29  | 3.85E-01 | 0.23  | 4.11E-01 |
| MYT1L    | 1.11 | 1.34E-01 | -0.46 | 6.77E-01 | 1.97  | 2.45E-02 |
| GMCL1    | 1.11 | 1.34E-01 | 1.54  | 6.19E-02 | 0.39  | 3.49E-01 |
| ANXA2    | 1.11 | 1.34E-01 | 1.88  | 3.04E-02 | -0.48 | 6.85E-01 |
| FND5     | 1.11 | 1.34E-01 | 0.02  | 4.91E-01 | 0.87  | 1.93E-01 |
| FAM3C    | 1.11 | 1.34E-01 | -0.41 | 6.57E-01 | 1.16  | 1.22E-01 |
| WDR87    | 1.11 | 1.34E-01 | -0.14 | 5.57E-01 | 0.67  | 2.50E-01 |
| OR1411   | 1.11 | 1.34E-01 | 2.17  | 1.50E-02 | -0.67 | 7.49E-01 |
| MRPS24   | 1.11 | 1.34E-01 | 0.69  | 2.44E-01 | 0.20  | 4.23E-01 |
| PTGIR    | 1.11 | 1.34E-01 | 0.79  | 2.13E-01 | 0.35  | 3.64E-01 |
| MMD2     | 1.11 | 1.34E-01 | 0.19  | 4.25E-01 | 1.64  | 5.05E-02 |
| TMEM255B | 1.11 | 1.34E-01 | 1.13  | 1.30E-01 | -0.06 | 5.24E-01 |
| DGAT2    | 1.11 | 1.34E-01 | 0.64  | 2.60E-01 | 0.30  | 3.81E-01 |
| SES3     | 1.11 | 1.34E-01 | 2.12  | 1.71E-02 | 0.08  | 4.69E-01 |
| TMEM178B | 1.11 | 1.34E-01 | 0.84  | 2.00E-01 | -0.29 | 6.16E-01 |
| DPF1     | 1.11 | 1.34E-01 | 1.27  | 1.03E-01 | -1.10 | 8.64E-01 |
| ZNF646   | 1.11 | 1.34E-01 | 1.96  | 2.49E-02 | -0.34 | 6.32E-01 |
| ETS1     | 1.11 | 1.34E-01 | -0.73 | 7.68E-01 | 0.80  | 2.10E-01 |
| FCGRT    | 1.11 | 1.34E-01 | 0.81  | 2.10E-01 | 0.57  | 2.85E-01 |

|          |      |          |       |          |       |          |
|----------|------|----------|-------|----------|-------|----------|
| LDLRAD3  | 1.11 | 1.34E-01 | -0.46 | 6.79E-01 | 2.08  | 1.89E-02 |
| ITGB4    | 1.11 | 1.34E-01 | 0.63  | 2.63E-01 | 1.65  | 4.96E-02 |
| HTT      | 1.11 | 1.34E-01 | 2.20  | 1.40E-02 | -0.20 | 5.80E-01 |
| HMGB2    | 1.11 | 1.35E-01 | 2.52  | 5.92E-03 | -0.06 | 5.22E-01 |
| POLM     | 1.10 | 1.35E-01 | 1.15  | 1.24E-01 | -0.27 | 6.08E-01 |
| KRT15    | 1.10 | 1.35E-01 | 0.74  | 2.30E-01 | -0.05 | 5.20E-01 |
| OR8B4    | 1.10 | 1.35E-01 | 0.94  | 1.73E-01 | -0.80 | 7.89E-01 |
| CEP170B  | 1.10 | 1.35E-01 | -1.09 | 8.61E-01 | 1.47  | 7.05E-02 |
| SERF2    | 1.10 | 1.35E-01 | 1.60  | 5.53E-02 | -0.03 | 5.10E-01 |
| DYRK1B   | 1.10 | 1.35E-01 | 3.24  | 6.03E-04 | 0.68  | 2.48E-01 |
| HSH2D    | 1.10 | 1.35E-01 | -0.88 | 8.10E-01 | 1.20  | 1.14E-01 |
| RPL6     | 1.10 | 1.35E-01 | -0.42 | 6.63E-01 | 1.06  | 1.44E-01 |
| RCOR1    | 1.10 | 1.35E-01 | 0.54  | 2.94E-01 | -0.20 | 5.79E-01 |
| PYCR1    | 1.10 | 1.35E-01 | 2.14  | 1.62E-02 | -0.50 | 6.90E-01 |
| OR5R1    | 1.10 | 1.36E-01 | 1.14  | 1.28E-01 | -0.79 | 7.85E-01 |
| MFAP1    | 1.10 | 1.36E-01 | 1.61  | 5.42E-02 | -0.09 | 5.36E-01 |
| SP110    | 1.10 | 1.36E-01 | 0.12  | 4.52E-01 | 1.18  | 1.19E-01 |
| C15orf39 | 1.10 | 1.36E-01 | 1.85  | 3.24E-02 | -1.71 | 9.57E-01 |
| COQ4     | 1.10 | 1.36E-01 | 1.17  | 1.22E-01 | 1.36  | 8.69E-02 |
| ARHGAP1  | 1.10 | 1.36E-01 | 0.06  | 4.76E-01 | 0.81  | 2.09E-01 |
| KIAA2018 | 1.10 | 1.36E-01 | 1.64  | 5.08E-02 | -0.60 | 7.26E-01 |
| DMXL2    | 1.10 | 1.36E-01 | -0.49 | 6.89E-01 | 1.54  | 6.18E-02 |
| KLHL26   | 1.10 | 1.36E-01 | 1.58  | 5.66E-02 | 0.13  | 4.48E-01 |
| RABGEF1  | 1.10 | 1.36E-01 | 1.61  | 5.37E-02 | 0.46  | 3.21E-01 |
| FBXL7    | 1.10 | 1.36E-01 | 2.09  | 1.85E-02 | -0.78 | 7.81E-01 |
| C3orf49  | 1.10 | 1.36E-01 | 1.19  | 1.18E-01 | 1.87  | 3.05E-02 |
| TEKT3    | 1.10 | 1.36E-01 | 0.88  | 1.90E-01 | 0.86  | 1.95E-01 |
| APOL3    | 1.10 | 1.36E-01 | 1.59  | 5.55E-02 | 0.86  | 1.96E-01 |
| OR52H1   | 1.10 | 1.36E-01 | -0.13 | 5.52E-01 | 0.91  | 1.80E-01 |
| TMEM107  | 1.10 | 1.36E-01 | 1.06  | 1.44E-01 | 0.92  | 1.78E-01 |
| INS-IGF2 | 1.10 | 1.36E-01 | 0.90  | 1.85E-01 | -0.26 | 6.01E-01 |

|          |      |          |       |          |       |          |
|----------|------|----------|-------|----------|-------|----------|
| LRRC3B   | 1.10 | 1.36E-01 | 1.65  | 4.96E-02 | 0.34  | 3.68E-01 |
| UBL4B    | 1.10 | 1.36E-01 | -0.58 | 7.20E-01 | 1.48  | 6.97E-02 |
| NKPD1    | 1.10 | 1.36E-01 | -1.56 | 9.40E-01 | 2.42  | 7.86E-03 |
| TTLL4    | 1.10 | 1.37E-01 | -0.97 | 8.33E-01 | 1.92  | 2.74E-02 |
| RANBP1   | 1.10 | 1.37E-01 | 0.54  | 2.95E-01 | 1.79  | 3.69E-02 |
| FKBP1B   | 1.10 | 1.37E-01 | 1.19  | 1.17E-01 | -0.74 | 7.71E-01 |
| TST      | 1.10 | 1.37E-01 | 0.96  | 1.68E-01 | -0.72 | 7.65E-01 |
| PACRG    | 1.09 | 1.37E-01 | -0.27 | 6.06E-01 | 0.33  | 3.72E-01 |
| TENM2    | 1.09 | 1.37E-01 | 0.98  | 1.63E-01 | -0.82 | 7.95E-01 |
| PPP1R17  | 1.09 | 1.37E-01 | 0.50  | 3.10E-01 | 1.22  | 1.11E-01 |
| FOXO3    | 1.09 | 1.37E-01 | -0.21 | 5.84E-01 | 1.14  | 1.28E-01 |
| YPEL5    | 1.09 | 1.37E-01 | -0.27 | 6.07E-01 | 0.79  | 2.15E-01 |
| TARSL2   | 1.09 | 1.37E-01 | 0.90  | 1.84E-01 | -0.31 | 6.23E-01 |
| ZG16B    | 1.09 | 1.37E-01 | 0.79  | 2.13E-01 | 0.10  | 4.60E-01 |
| MANBAL   | 1.09 | 1.37E-01 | -0.25 | 6.00E-01 | 1.05  | 1.48E-01 |
| POGK     | 1.09 | 1.37E-01 | 0.95  | 1.72E-01 | 0.31  | 3.77E-01 |
| PCOLCE2  | 1.09 | 1.37E-01 | -0.50 | 6.91E-01 | 2.87  | 2.03E-03 |
| ZDHHCS   | 1.09 | 1.37E-01 | 1.43  | 7.62E-02 | 0.49  | 3.11E-01 |
| ACPP     | 1.09 | 1.37E-01 | 0.57  | 2.85E-01 | -0.15 | 5.61E-01 |
| RTN4IP1  | 1.09 | 1.37E-01 | 1.39  | 8.27E-02 | -0.74 | 7.69E-01 |
| CPPED1   | 1.09 | 1.37E-01 | 0.77  | 2.20E-01 | -0.54 | 7.05E-01 |
| TMEM126A | 1.09 | 1.37E-01 | 0.79  | 2.14E-01 | 0.43  | 3.35E-01 |
| PRPH     | 1.09 | 1.37E-01 | 1.85  | 3.24E-02 | -1.80 | 9.64E-01 |
| PTPRC    | 1.09 | 1.37E-01 | -0.65 | 7.42E-01 | 1.14  | 1.28E-01 |
| PSMD14   | 1.09 | 1.37E-01 | 0.86  | 1.95E-01 | 0.26  | 3.97E-01 |
| ZNF839   | 1.09 | 1.37E-01 | 0.79  | 2.14E-01 | -0.17 | 5.66E-01 |
| OSMR     | 1.09 | 1.38E-01 | 1.02  | 1.55E-01 | -0.53 | 7.02E-01 |
| CCL7     | 1.09 | 1.38E-01 | 0.57  | 2.85E-01 | 0.39  | 3.49E-01 |
| CHPF2    | 1.09 | 1.38E-01 | 0.42  | 3.37E-01 | 0.33  | 3.72E-01 |
| TMEM196  | 1.09 | 1.38E-01 | -0.39 | 6.52E-01 | 1.03  | 1.51E-01 |
| FAM98A   | 1.09 | 1.38E-01 | 0.51  | 3.05E-01 | 0.34  | 3.68E-01 |

|          |      |          |       |          |       |          |
|----------|------|----------|-------|----------|-------|----------|
| NTAN1    | 1.09 | 1.38E-01 | 1.26  | 1.04E-01 | 0.02  | 4.91E-01 |
| DEGS2    | 1.09 | 1.38E-01 | 1.94  | 2.60E-02 | -0.87 | 8.09E-01 |
| MED17    | 1.09 | 1.38E-01 | 0.81  | 2.08E-01 | 0.28  | 3.92E-01 |
| MRPL20   | 1.09 | 1.38E-01 | 0.66  | 2.54E-01 | 0.29  | 3.88E-01 |
| NUDT22   | 1.09 | 1.38E-01 | -0.28 | 6.10E-01 | 1.12  | 1.32E-01 |
| LMO7     | 1.09 | 1.38E-01 | 2.21  | 1.34E-02 | -1.86 | 9.69E-01 |
| GLRX5    | 1.09 | 1.38E-01 | -0.41 | 6.59E-01 | 0.89  | 1.86E-01 |
| C9orf116 | 1.09 | 1.38E-01 | 0.57  | 2.83E-01 | 0.41  | 3.42E-01 |
| ABL2     | 1.09 | 1.38E-01 | -0.03 | 5.13E-01 | 0.61  | 2.69E-01 |
| SLC6A6   | 1.09 | 1.38E-01 | 1.09  | 1.37E-01 | -0.56 | 7.12E-01 |
| APOL4    | 1.09 | 1.38E-01 | 0.17  | 4.34E-01 | 0.56  | 2.87E-01 |
| OR2G2    | 1.09 | 1.38E-01 | 1.43  | 7.61E-02 | -0.77 | 7.78E-01 |
| DUOXA1   | 1.09 | 1.38E-01 | 1.32  | 9.30E-02 | -0.61 | 7.30E-01 |
| FDX1     | 1.09 | 1.39E-01 | 1.12  | 1.32E-01 | -0.32 | 6.26E-01 |
| CCDC169  | 1.09 | 1.39E-01 | 1.99  | 2.35E-02 | -0.87 | 8.08E-01 |
| GBE1     | 1.09 | 1.39E-01 | 2.36  | 9.23E-03 | -0.84 | 8.01E-01 |
| CDC37    | 1.09 | 1.39E-01 | -0.68 | 7.52E-01 | 1.76  | 3.89E-02 |
| CDC42BPG | 1.09 | 1.39E-01 | -0.54 | 7.06E-01 | 1.32  | 9.38E-02 |
| HAGHL    | 1.09 | 1.39E-01 | 1.10  | 1.36E-01 | -0.43 | 6.67E-01 |
| N4BP3    | 1.09 | 1.39E-01 | 0.99  | 1.62E-01 | 1.29  | 9.84E-02 |
| SLC23A3  | 1.09 | 1.39E-01 | 0.25  | 4.00E-01 | 1.13  | 1.28E-01 |
| MRPL37   | 1.08 | 1.39E-01 | 0.66  | 2.53E-01 | 0.48  | 3.17E-01 |
| SYT6     | 1.08 | 1.39E-01 | -0.53 | 7.03E-01 | -0.19 | 5.77E-01 |
| ENPP2    | 1.08 | 1.39E-01 | 0.04  | 4.83E-01 | 0.96  | 1.68E-01 |
| PCDH17   | 1.08 | 1.39E-01 | 2.61  | 4.53E-03 | -0.13 | 5.50E-01 |
| RFPL3    | 1.08 | 1.39E-01 | 0.16  | 4.35E-01 | 1.34  | 8.94E-02 |
| PCDH1    | 1.08 | 1.39E-01 | 1.72  | 4.25E-02 | 0.30  | 3.82E-01 |
| SLC25A18 | 1.08 | 1.39E-01 | 1.07  | 1.42E-01 | -0.86 | 8.06E-01 |
| NHEJ1    | 1.08 | 1.39E-01 | 0.29  | 3.84E-01 | 1.08  | 1.40E-01 |
| SDC1     | 1.08 | 1.39E-01 | -0.40 | 6.55E-01 | 1.75  | 3.97E-02 |
| FCN3     | 1.08 | 1.39E-01 | 1.51  | 6.52E-02 | 1.41  | 7.95E-02 |

|              |      |          |       |          |       |          |
|--------------|------|----------|-------|----------|-------|----------|
| RRP36        | 1.08 | 1.39E-01 | 0.93  | 1.75E-01 | 0.28  | 3.91E-01 |
| ZNF208       | 1.08 | 1.39E-01 | 2.82  | 2.43E-03 | 0.03  | 4.89E-01 |
| TMEM52       | 1.08 | 1.39E-01 | 1.66  | 4.87E-02 | 0.37  | 3.57E-01 |
| TFDP1        | 1.08 | 1.40E-01 | -0.03 | 5.14E-01 | 1.13  | 1.28E-01 |
| IRAK3        | 1.08 | 1.40E-01 | 1.06  | 1.45E-01 | -0.87 | 8.08E-01 |
| MRPL16       | 1.08 | 1.40E-01 | 2.08  | 1.90E-02 | -0.47 | 6.81E-01 |
| SVEP1        | 1.08 | 1.40E-01 | 0.67  | 2.51E-01 | 0.26  | 3.97E-01 |
| HTR1D        | 1.08 | 1.40E-01 | 1.89  | 2.93E-02 | 0.31  | 3.79E-01 |
| RP11-723G8.2 | 1.08 | 1.40E-01 | 0.79  | 2.15E-01 | 0.28  | 3.90E-01 |
| PATL1        | 1.08 | 1.40E-01 | 1.24  | 1.08E-01 | -0.48 | 6.84E-01 |
| RILPL2       | 1.08 | 1.40E-01 | 0.38  | 3.53E-01 | 0.46  | 3.22E-01 |
| TNIP2        | 1.08 | 1.40E-01 | 0.00  | 4.99E-01 | 0.53  | 2.98E-01 |
| RAB36        | 1.08 | 1.40E-01 | -0.62 | 7.31E-01 | 1.09  | 1.38E-01 |
| TAGLN3       | 1.08 | 1.40E-01 | 0.35  | 3.64E-01 | -0.31 | 6.22E-01 |
| CREB1        | 1.08 | 1.40E-01 | 0.66  | 2.56E-01 | 1.22  | 1.12E-01 |
| ZNF165       | 1.08 | 1.40E-01 | 0.37  | 3.54E-01 | 0.57  | 2.85E-01 |
| TEX15        | 1.08 | 1.40E-01 | 1.02  | 1.53E-01 | -0.23 | 5.92E-01 |
| CMTR2        | 1.08 | 1.40E-01 | 1.25  | 1.06E-01 | -1.14 | 8.72E-01 |
| LCMT1        | 1.08 | 1.40E-01 | 0.58  | 2.81E-01 | 1.09  | 1.39E-01 |
| PDHA2        | 1.08 | 1.40E-01 | 1.99  | 2.31E-02 | -0.90 | 8.16E-01 |
| DHX58        | 1.08 | 1.40E-01 | 0.85  | 1.97E-01 | -0.32 | 6.26E-01 |
| ZFYVE1       | 1.08 | 1.40E-01 | 0.96  | 1.69E-01 | 1.27  | 1.02E-01 |
| AC079341.1   | 1.08 | 1.40E-01 | 0.82  | 2.06E-01 | 0.72  | 2.36E-01 |
| TAF8         | 1.08 | 1.40E-01 | -0.11 | 5.45E-01 | 1.16  | 1.23E-01 |
| TMEM136      | 1.08 | 1.40E-01 | 0.70  | 2.42E-01 | 0.39  | 3.48E-01 |
| RAP1GDS1     | 1.08 | 1.40E-01 | 0.99  | 1.61E-01 | -0.22 | 5.86E-01 |
| RPE          | 1.08 | 1.40E-01 | 1.28  | 1.00E-01 | 0.06  | 4.78E-01 |
| CYB561D1     | 1.08 | 1.40E-01 | -0.72 | 7.65E-01 | 2.59  | 4.75E-03 |
| PPP4R4       | 1.08 | 1.40E-01 | 0.15  | 4.39E-01 | 1.56  | 5.96E-02 |
| CYB5D2       | 1.08 | 1.40E-01 | 0.44  | 3.30E-01 | 0.57  | 2.83E-01 |
| S BSPON      | 1.08 | 1.41E-01 | 0.46  | 3.21E-01 | -0.17 | 5.67E-01 |

|             |      |          |       |          |       |          |
|-------------|------|----------|-------|----------|-------|----------|
| HIST1H2AA   | 1.08 | 1.41E-01 | 0.18  | 4.30E-01 | 0.74  | 2.30E-01 |
| TIMM8B      | 1.08 | 1.41E-01 | -1.74 | 9.59E-01 | 1.98  | 2.38E-02 |
| ATP5EP2     | 1.08 | 1.41E-01 | 1.12  | 1.31E-01 | -0.03 | 5.13E-01 |
| CHEK1       | 1.08 | 1.41E-01 | 0.56  | 2.88E-01 | 0.30  | 3.83E-01 |
| LY75-CD302  | 1.08 | 1.41E-01 | 0.21  | 4.15E-01 | 0.06  | 4.74E-01 |
| LY75        | 1.08 | 1.41E-01 | 0.21  | 4.15E-01 | 0.06  | 4.74E-01 |
| CDCP1       | 1.08 | 1.41E-01 | 0.02  | 4.93E-01 | 1.67  | 4.72E-02 |
| CHDH        | 1.08 | 1.41E-01 | 1.98  | 2.37E-02 | -1.13 | 8.72E-01 |
| HOXA1       | 1.08 | 1.41E-01 | -1.31 | 9.04E-01 | 1.79  | 3.67E-02 |
| MAGEL2      | 1.08 | 1.41E-01 | 2.02  | 2.19E-02 | -1.10 | 8.64E-01 |
| ZNF667      | 1.08 | 1.41E-01 | -0.40 | 6.55E-01 | 0.82  | 2.07E-01 |
| CTC-429P9.4 | 1.08 | 1.41E-01 | -0.27 | 6.05E-01 | 0.23  | 4.10E-01 |
| VWF         | 1.08 | 1.41E-01 | 0.83  | 2.04E-01 | 0.73  | 2.34E-01 |
| PAQR8       | 1.08 | 1.41E-01 | 0.22  | 4.14E-01 | 1.03  | 1.53E-01 |
| TRIM24      | 1.07 | 1.41E-01 | 0.00  | 4.99E-01 | 1.37  | 8.58E-02 |
| MUTYH       | 1.07 | 1.41E-01 | 0.53  | 2.98E-01 | -0.42 | 6.62E-01 |
| SLC12A7     | 1.07 | 1.41E-01 | -0.64 | 7.37E-01 | 1.93  | 2.66E-02 |
| ZNF248      | 1.07 | 1.42E-01 | 1.20  | 1.15E-01 | -0.11 | 5.44E-01 |
| MAPKAP1     | 1.07 | 1.42E-01 | 2.37  | 8.95E-03 | -0.91 | 8.19E-01 |
| NDUFA4      | 1.07 | 1.42E-01 | -0.57 | 7.16E-01 | 1.16  | 1.23E-01 |
| GIN51       | 1.07 | 1.42E-01 | -0.08 | 5.31E-01 | 1.10  | 1.36E-01 |
| SPC24       | 1.07 | 1.42E-01 | 1.61  | 5.41E-02 | 0.50  | 3.09E-01 |
| COL12A1     | 1.07 | 1.42E-01 | 1.30  | 9.74E-02 | -1.22 | 8.88E-01 |
| NDUFAF2     | 1.07 | 1.42E-01 | -0.72 | 7.63E-01 | 2.19  | 1.41E-02 |
| RPS28       | 1.07 | 1.42E-01 | 0.28  | 3.89E-01 | 0.50  | 3.09E-01 |
| VSIG2       | 1.07 | 1.42E-01 | 0.08  | 4.67E-01 | 1.54  | 6.15E-02 |
| MUC17       | 1.07 | 1.42E-01 | -0.48 | 6.84E-01 | 1.44  | 7.46E-02 |
| FAM132A     | 1.07 | 1.42E-01 | -0.29 | 6.16E-01 | 1.23  | 1.09E-01 |
| ITGAX       | 1.07 | 1.42E-01 | -0.89 | 8.14E-01 | 0.88  | 1.88E-01 |
| SLC14A2     | 1.07 | 1.42E-01 | -0.21 | 5.85E-01 | -0.13 | 5.50E-01 |
| SLC22A31    | 1.07 | 1.42E-01 | 1.22  | 1.10E-01 | -0.50 | 6.92E-01 |

|             |      |          |       |          |       |          |
|-------------|------|----------|-------|----------|-------|----------|
| CCNL1       | 1.07 | 1.43E-01 | 1.15  | 1.25E-01 | -0.03 | 5.13E-01 |
| NAPG        | 1.07 | 1.43E-01 | 1.26  | 1.03E-01 | -0.77 | 7.78E-01 |
| RASSF3      | 1.07 | 1.43E-01 | 1.27  | 1.02E-01 | -0.45 | 6.72E-01 |
| FMO3        | 1.07 | 1.43E-01 | 1.15  | 1.26E-01 | 0.19  | 4.23E-01 |
| AC006547.14 | 1.07 | 1.43E-01 | 0.29  | 3.86E-01 | 1.56  | 5.99E-02 |
| HTR3A       | 1.07 | 1.43E-01 | -0.38 | 6.50E-01 | 0.95  | 1.72E-01 |
| OR2G3       | 1.07 | 1.43E-01 | 0.08  | 4.70E-01 | 0.31  | 3.78E-01 |
| ACTL7A      | 1.07 | 1.43E-01 | 0.57  | 2.83E-01 | -0.05 | 5.19E-01 |
| SPATA8      | 1.07 | 1.43E-01 | -0.17 | 5.66E-01 | 0.93  | 1.77E-01 |
| TDRD9       | 1.07 | 1.43E-01 | 0.99  | 1.60E-01 | -0.21 | 5.84E-01 |
| MBNL1       | 1.07 | 1.43E-01 | 1.21  | 1.13E-01 | 0.45  | 3.26E-01 |
| PEA15       | 1.07 | 1.43E-01 | 1.50  | 6.66E-02 | -1.05 | 8.53E-01 |
| AADACL2     | 1.07 | 1.43E-01 | 1.13  | 1.28E-01 | 0.48  | 3.16E-01 |
| STK24       | 1.07 | 1.43E-01 | 1.21  | 1.13E-01 | -0.25 | 5.97E-01 |
| PHF13       | 1.07 | 1.43E-01 | 0.62  | 2.69E-01 | 0.94  | 1.73E-01 |
| RPL27       | 1.07 | 1.43E-01 | 0.52  | 3.02E-01 | 0.28  | 3.89E-01 |
| EPHA6       | 1.07 | 1.43E-01 | -0.37 | 6.45E-01 | 0.15  | 4.41E-01 |
| TBC1D9B     | 1.06 | 1.43E-01 | 0.85  | 1.97E-01 | -0.54 | 7.05E-01 |
| FOXD1       | 1.06 | 1.43E-01 | 0.47  | 3.19E-01 | 0.57  | 2.85E-01 |
| PAPLN       | 1.06 | 1.44E-01 | 1.26  | 1.04E-01 | 0.87  | 1.92E-01 |
| PFAS        | 1.06 | 1.44E-01 | 0.24  | 4.04E-01 | 1.44  | 7.56E-02 |
| IRX4        | 1.06 | 1.44E-01 | 0.77  | 2.21E-01 | 0.96  | 1.70E-01 |
| C16orf45    | 1.06 | 1.44E-01 | -0.58 | 7.19E-01 | 2.95  | 1.59E-03 |
| PMP22       | 1.06 | 1.44E-01 | 0.16  | 4.38E-01 | 1.01  | 1.56E-01 |
| CWF19L1     | 1.06 | 1.44E-01 | 0.77  | 2.20E-01 | 0.55  | 2.92E-01 |
| VAT1L       | 1.06 | 1.44E-01 | 0.93  | 1.77E-01 | -0.52 | 6.97E-01 |
| SLC2A4      | 1.06 | 1.44E-01 | 0.12  | 4.53E-01 | 0.84  | 2.00E-01 |
| NEK10       | 1.06 | 1.44E-01 | 1.28  | 1.00E-01 | -0.72 | 7.63E-01 |
| ZNF728      | 1.06 | 1.44E-01 | 0.24  | 4.05E-01 | 0.76  | 2.23E-01 |
| SAAL1       | 1.06 | 1.44E-01 | 1.28  | 1.00E-01 | 0.56  | 2.88E-01 |
| CCDC81      | 1.06 | 1.44E-01 | 0.87  | 1.93E-01 | -1.44 | 9.25E-01 |



|          |      |          |       |          |       |          |
|----------|------|----------|-------|----------|-------|----------|
| GPR133   | 1.06 | 1.44E-01 | 0.89  | 1.86E-01 | 1.80  | 3.60E-02 |
| HSD17B13 | 1.06 | 1.44E-01 | -0.47 | 6.82E-01 | 1.13  | 1.29E-01 |
| CDH1     | 1.06 | 1.44E-01 | 0.15  | 4.42E-01 | 0.28  | 3.92E-01 |
| ACTL6B   | 1.06 | 1.44E-01 | 0.43  | 3.35E-01 | 0.33  | 3.70E-01 |
| ELL      | 1.06 | 1.44E-01 | -0.02 | 5.08E-01 | 1.15  | 1.24E-01 |
| PPP1R12A | 1.06 | 1.44E-01 | 0.81  | 2.09E-01 | 0.04  | 4.85E-01 |
| SERPINI2 | 1.06 | 1.44E-01 | 0.96  | 1.69E-01 | 0.17  | 4.33E-01 |
| CASP16   | 1.06 | 1.44E-01 | -1.04 | 8.51E-01 | 1.73  | 4.20E-02 |
| TNFRSF8  | 1.06 | 1.44E-01 | 0.84  | 2.02E-01 | 1.65  | 4.99E-02 |
| ELOVL3   | 1.06 | 1.44E-01 | 0.87  | 1.93E-01 | 0.32  | 3.76E-01 |
| OR2T1    | 1.06 | 1.44E-01 | 0.85  | 1.97E-01 | 0.22  | 4.12E-01 |
| VWA1     | 1.06 | 1.45E-01 | 1.25  | 1.06E-01 | -0.60 | 7.26E-01 |
| MOB1B    | 1.06 | 1.45E-01 | 0.56  | 2.88E-01 | 0.23  | 4.09E-01 |
| KCNA2    | 1.06 | 1.45E-01 | 1.18  | 1.20E-01 | -0.14 | 5.56E-01 |
| C8orf76  | 1.06 | 1.45E-01 | 1.87  | 3.05E-02 | 0.19  | 4.24E-01 |
| CEP57    | 1.06 | 1.45E-01 | -0.53 | 7.01E-01 | 2.01  | 2.24E-02 |
| GPR75    | 1.06 | 1.45E-01 | 1.01  | 1.56E-01 | -1.02 | 8.47E-01 |
| OR52D1   | 1.06 | 1.45E-01 | 1.62  | 5.23E-02 | -1.64 | 9.49E-01 |
| NSUN2    | 1.06 | 1.45E-01 | -0.32 | 6.24E-01 | 1.43  | 7.58E-02 |
| KIF23    | 1.06 | 1.45E-01 | 0.61  | 2.71E-01 | 0.19  | 4.24E-01 |
| LEF1     | 1.06 | 1.45E-01 | 1.74  | 4.10E-02 | -1.03 | 8.48E-01 |
| GADD45G  | 1.06 | 1.45E-01 | 0.10  | 4.60E-01 | 0.03  | 4.89E-01 |
| B4GALNT2 | 1.06 | 1.45E-01 | -0.70 | 7.59E-01 | 1.16  | 1.24E-01 |
| SRSF3    | 1.06 | 1.45E-01 | 0.64  | 2.60E-01 | 0.71  | 2.40E-01 |
| CENPJ    | 1.06 | 1.45E-01 | 0.23  | 4.08E-01 | 0.27  | 3.92E-01 |
| DYNLRB1  | 1.06 | 1.45E-01 | 0.62  | 2.67E-01 | 0.13  | 4.49E-01 |
| KATNAL1  | 1.06 | 1.46E-01 | 1.62  | 5.28E-02 | -0.81 | 7.92E-01 |
| TIMMDC1  | 1.06 | 1.46E-01 | 1.13  | 1.29E-01 | 0.86  | 1.94E-01 |
| HERC6    | 1.06 | 1.46E-01 | 0.85  | 1.99E-01 | 0.76  | 2.22E-01 |
| CLP1     | 1.06 | 1.46E-01 | 1.35  | 8.85E-02 | 0.18  | 4.29E-01 |
| CTNBL1   | 1.06 | 1.46E-01 | 1.39  | 8.25E-02 | -0.14 | 5.55E-01 |

|           |      |          |       |          |       |          |
|-----------|------|----------|-------|----------|-------|----------|
| ZBTB47    | 1.06 | 1.46E-01 | 1.01  | 1.57E-01 | 0.16  | 4.36E-01 |
| CPA4      | 1.06 | 1.46E-01 | 1.36  | 8.72E-02 | 1.40  | 8.11E-02 |
| PPDPF     | 1.05 | 1.46E-01 | -0.63 | 7.35E-01 | 1.45  | 7.35E-02 |
| DIO1      | 1.05 | 1.46E-01 | -0.46 | 6.79E-01 | 0.83  | 2.04E-01 |
| TRPV5     | 1.05 | 1.46E-01 | 0.48  | 3.17E-01 | 1.20  | 1.15E-01 |
| CTHRC1    | 1.05 | 1.46E-01 | 0.47  | 3.18E-01 | 0.37  | 3.58E-01 |
| QSOX2     | 1.05 | 1.46E-01 | 0.67  | 2.50E-01 | -0.90 | 8.17E-01 |
| HIST1H2BD | 1.05 | 1.46E-01 | 0.94  | 1.73E-01 | -0.51 | 6.95E-01 |
| AIMP1     | 1.05 | 1.46E-01 | 0.53  | 2.98E-01 | 0.44  | 3.30E-01 |
| TMEM26    | 1.05 | 1.46E-01 | 2.39  | 8.43E-03 | -1.08 | 8.60E-01 |
| PLEC      | 1.05 | 1.46E-01 | 1.87  | 3.09E-02 | -0.96 | 8.33E-01 |
| ZNF25     | 1.05 | 1.46E-01 | 0.75  | 2.26E-01 | 0.24  | 4.05E-01 |
| P2RX3     | 1.05 | 1.46E-01 | 0.46  | 3.24E-01 | 1.90  | 2.87E-02 |
| RICTOR    | 1.05 | 1.46E-01 | 0.64  | 2.61E-01 | 0.39  | 3.48E-01 |
| GCFC2     | 1.05 | 1.46E-01 | 2.00  | 2.25E-02 | 1.27  | 1.01E-01 |
| CSTF2T    | 1.05 | 1.47E-01 | -0.36 | 6.42E-01 | 1.19  | 1.18E-01 |
| MFSD10    | 1.05 | 1.47E-01 | -0.18 | 5.71E-01 | 0.71  | 2.39E-01 |
| C1orf216  | 1.05 | 1.47E-01 | 0.29  | 3.84E-01 | 0.93  | 1.77E-01 |
| OR51E2    | 1.05 | 1.47E-01 | 0.60  | 2.74E-01 | -0.23 | 5.92E-01 |
| HIST1H2AC | 1.05 | 1.47E-01 | -0.09 | 5.36E-01 | -0.02 | 5.08E-01 |
| ZCCHC11   | 1.05 | 1.47E-01 | 0.28  | 3.91E-01 | 0.88  | 1.90E-01 |
| HSPB2     | 1.05 | 1.47E-01 | 1.68  | 4.69E-02 | -0.59 | 7.22E-01 |
| RARS2     | 1.05 | 1.47E-01 | -0.07 | 5.28E-01 | 1.12  | 1.32E-01 |
| GNA11     | 1.05 | 1.47E-01 | 0.68  | 2.48E-01 | -0.39 | 6.53E-01 |
| SRPR      | 1.05 | 1.47E-01 | -0.99 | 8.40E-01 | 2.01  | 2.21E-02 |
| KDM5A     | 1.05 | 1.47E-01 | 0.84  | 2.02E-01 | -0.51 | 6.93E-01 |
| CELF2     | 1.05 | 1.47E-01 | 0.06  | 4.75E-01 | 1.07  | 1.43E-01 |
| VPS26B    | 1.05 | 1.47E-01 | -0.23 | 5.91E-01 | 0.89  | 1.88E-01 |
| C1R       | 1.05 | 1.47E-01 | -0.53 | 7.03E-01 | 1.85  | 3.21E-02 |
| ABRACL    | 1.05 | 1.48E-01 | 0.73  | 2.33E-01 | 0.81  | 2.08E-01 |
| SLC35E1   | 1.05 | 1.48E-01 | -0.13 | 5.52E-01 | 0.23  | 4.09E-01 |

|              |      |          |       |          |       |          |
|--------------|------|----------|-------|----------|-------|----------|
| CDH18        | 1.05 | 1.48E-01 | 1.00  | 1.58E-01 | 0.16  | 4.36E-01 |
| DFFB         | 1.05 | 1.48E-01 | 0.15  | 4.42E-01 | 0.01  | 4.95E-01 |
| TBXAS1       | 1.05 | 1.48E-01 | 2.10  | 1.81E-02 | -0.80 | 7.90E-01 |
| RP4-758J18.2 | 1.05 | 1.48E-01 | 1.22  | 1.11E-01 | -0.43 | 6.67E-01 |
| CAMK2N1      | 1.05 | 1.48E-01 | 0.33  | 3.71E-01 | 0.52  | 3.02E-01 |
| PSMB7        | 1.05 | 1.48E-01 | 0.90  | 1.84E-01 | -0.92 | 8.22E-01 |
| C14orf105    | 1.05 | 1.48E-01 | 0.16  | 4.36E-01 | 1.21  | 1.13E-01 |
| TMEM161A     | 1.04 | 1.48E-01 | 0.14  | 4.46E-01 | 0.49  | 3.11E-01 |
| CLEC3A       | 1.04 | 1.48E-01 | 0.92  | 1.79E-01 | 0.19  | 4.26E-01 |
| HOOK2        | 1.04 | 1.48E-01 | 0.02  | 4.91E-01 | 0.47  | 3.18E-01 |
| ANKDD1B      | 1.04 | 1.48E-01 | 1.01  | 1.55E-01 | 0.02  | 4.90E-01 |
| HIPK1        | 1.04 | 1.48E-01 | 1.06  | 1.45E-01 | 0.61  | 2.73E-01 |
| OR51A2       | 1.04 | 1.48E-01 | -0.49 | 6.87E-01 | 1.42  | 7.73E-02 |
| ANO2         | 1.04 | 1.48E-01 | 0.34  | 3.66E-01 | 0.67  | 2.50E-01 |
| C11orf86     | 1.04 | 1.48E-01 | 0.32  | 3.74E-01 | 0.30  | 3.81E-01 |
| SEC23IP      | 1.04 | 1.48E-01 | 0.94  | 1.75E-01 | 0.18  | 4.28E-01 |
| TMA16        | 1.04 | 1.48E-01 | 1.12  | 1.32E-01 | -0.53 | 7.02E-01 |
| TM4SF19      | 1.04 | 1.48E-01 | -0.96 | 8.31E-01 | 1.59  | 5.62E-02 |
| ANO9         | 1.04 | 1.49E-01 | 0.03  | 4.89E-01 | 2.52  | 5.92E-03 |
| DCAF11       | 1.04 | 1.49E-01 | 0.51  | 3.05E-01 | -0.01 | 5.03E-01 |
| AQP3         | 1.04 | 1.49E-01 | -0.62 | 7.32E-01 | 1.20  | 1.16E-01 |
| ARHGEF12     | 1.04 | 1.49E-01 | 0.77  | 2.19E-01 | -0.14 | 5.54E-01 |
| CEP70        | 1.04 | 1.49E-01 | 0.42  | 3.38E-01 | 0.05  | 4.78E-01 |
| COX18        | 1.04 | 1.49E-01 | 1.10  | 1.35E-01 | -0.29 | 6.13E-01 |
| HIST1H1D     | 1.04 | 1.49E-01 | -0.24 | 5.96E-01 | 2.70  | 3.51E-03 |
| STX1B        | 1.04 | 1.49E-01 | 1.43  | 7.69E-02 | -0.60 | 7.27E-01 |
| SPON2        | 1.04 | 1.49E-01 | -0.14 | 5.55E-01 | 1.48  | 6.89E-02 |
| ELOVL4       | 1.04 | 1.49E-01 | 0.20  | 4.19E-01 | 0.91  | 1.82E-01 |
| C12orf44     | 1.04 | 1.49E-01 | 0.21  | 4.15E-01 | 0.18  | 4.29E-01 |
| DDX18        | 1.04 | 1.50E-01 | 1.54  | 6.16E-02 | -0.67 | 7.49E-01 |
| CHERP        | 1.04 | 1.50E-01 | -0.35 | 6.37E-01 | 0.28  | 3.88E-01 |

|           |      |          |       |          |       |          |
|-----------|------|----------|-------|----------|-------|----------|
| MSH2      | 1.04 | 1.50E-01 | 0.53  | 2.97E-01 | -0.02 | 5.08E-01 |
| PDZRN4    | 1.04 | 1.50E-01 | 1.52  | 6.47E-02 | -0.81 | 7.91E-01 |
| LINGO3    | 1.04 | 1.50E-01 | -0.64 | 7.39E-01 | 0.87  | 1.91E-01 |
| FBXO33    | 1.04 | 1.50E-01 | 0.43  | 3.33E-01 | 1.45  | 7.39E-02 |
| ALG3      | 1.04 | 1.50E-01 | 0.51  | 3.04E-01 | -0.05 | 5.18E-01 |
| SYPL2     | 1.04 | 1.50E-01 | -0.02 | 5.07E-01 | 2.88  | 1.99E-03 |
| MIEF2     | 1.04 | 1.50E-01 | 1.85  | 3.24E-02 | -1.54 | 9.38E-01 |
| ZFP69B    | 1.04 | 1.50E-01 | 0.31  | 3.80E-01 | 0.42  | 3.36E-01 |
| FRY       | 1.04 | 1.50E-01 | -0.30 | 6.16E-01 | 0.15  | 4.40E-01 |
| ANKRD17   | 1.04 | 1.50E-01 | 0.97  | 1.66E-01 | -0.03 | 5.14E-01 |
| ADCY6     | 1.04 | 1.50E-01 | -0.30 | 6.17E-01 | 0.87  | 1.92E-01 |
| LOXL3     | 1.04 | 1.50E-01 | 0.16  | 4.38E-01 | 0.44  | 3.28E-01 |
| SCARF1    | 1.04 | 1.50E-01 | -0.37 | 6.44E-01 | 0.94  | 1.74E-01 |
| ZNF573    | 1.04 | 1.50E-01 | 0.57  | 2.84E-01 | 0.06  | 4.77E-01 |
| ARHGAP11B | 1.03 | 1.50E-01 | 1.30  | 9.65E-02 | -1.38 | 9.16E-01 |
| SORCS1    | 1.03 | 1.50E-01 | -0.12 | 5.48E-01 | 0.39  | 3.49E-01 |
| AKIRIN2   | 1.03 | 1.50E-01 | -0.54 | 7.06E-01 | 1.11  | 1.33E-01 |
| RSRC1     | 1.03 | 1.50E-01 | 0.15  | 4.41E-01 | 0.26  | 3.98E-01 |
| GJB6      | 1.03 | 1.51E-01 | 2.41  | 7.90E-03 | -0.11 | 5.42E-01 |
| OR5V1     | 1.03 | 1.51E-01 | 0.41  | 3.43E-01 | 0.62  | 2.66E-01 |
| HMX3      | 1.03 | 1.51E-01 | 1.29  | 9.89E-02 | -0.45 | 6.73E-01 |
| PLG       | 1.03 | 1.51E-01 | -0.26 | 6.02E-01 | 0.47  | 3.19E-01 |
| SNTN      | 1.03 | 1.51E-01 | -0.17 | 5.69E-01 | 0.80  | 2.12E-01 |
| SATB2     | 1.03 | 1.51E-01 | 0.32  | 3.74E-01 | 1.24  | 1.07E-01 |
| HTRA4     | 1.03 | 1.51E-01 | 1.79  | 3.69E-02 | -1.51 | 9.34E-01 |
| INF2      | 1.03 | 1.51E-01 | 1.06  | 1.45E-01 | -0.05 | 5.21E-01 |
| MCOLN3    | 1.03 | 1.51E-01 | 0.92  | 1.80E-01 | -0.29 | 6.13E-01 |
| SLC16A10  | 1.03 | 1.51E-01 | 1.31  | 9.49E-02 | -1.17 | 8.79E-01 |
| FAM174B   | 1.03 | 1.51E-01 | 1.17  | 1.21E-01 | -1.12 | 8.68E-01 |
| NPPC      | 1.03 | 1.51E-01 | 1.67  | 4.73E-02 | -0.80 | 7.87E-01 |
| PKD1      | 1.03 | 1.51E-01 | 0.89  | 1.88E-01 | 0.07  | 4.71E-01 |

|            |      |          |       |          |       |          |
|------------|------|----------|-------|----------|-------|----------|
| HS3ST1     | 1.03 | 1.51E-01 | 1.32  | 9.39E-02 | -0.16 | 5.65E-01 |
| WISP2      | 1.03 | 1.51E-01 | 0.13  | 4.49E-01 | 0.27  | 3.92E-01 |
| SPTY2D1    | 1.03 | 1.51E-01 | -1.17 | 8.79E-01 | 2.60  | 4.60E-03 |
| AL031666.2 | 1.03 | 1.52E-01 | -0.23 | 5.92E-01 | 1.16  | 1.22E-01 |
| CALM2      | 1.03 | 1.52E-01 | 2.65  | 3.97E-03 | -0.50 | 6.93E-01 |
| FXR1       | 1.03 | 1.52E-01 | 0.01  | 4.96E-01 | 3.20  | 6.87E-04 |
| OR6B2      | 1.03 | 1.52E-01 | 0.96  | 1.68E-01 | -0.22 | 5.86E-01 |
| KHDC1      | 1.03 | 1.52E-01 | 1.26  | 1.04E-01 | -1.00 | 8.41E-01 |
| SYNE4      | 1.03 | 1.52E-01 | 2.15  | 1.56E-02 | -1.54 | 9.38E-01 |
| TRPV2      | 1.03 | 1.52E-01 | 0.94  | 1.74E-01 | 0.32  | 3.73E-01 |
| CACNG7     | 1.03 | 1.52E-01 | -0.13 | 5.51E-01 | 0.88  | 1.89E-01 |
| ACTL10     | 1.03 | 1.52E-01 | 1.40  | 8.02E-02 | -0.72 | 7.64E-01 |
| TMEM82     | 1.03 | 1.52E-01 | 0.61  | 2.71E-01 | -0.12 | 5.47E-01 |
| NET1       | 1.03 | 1.52E-01 | 0.62  | 2.67E-01 | -0.04 | 5.15E-01 |
| RGMA       | 1.03 | 1.52E-01 | 0.36  | 3.61E-01 | -0.09 | 5.37E-01 |
| PARP9      | 1.03 | 1.52E-01 | 0.70  | 2.41E-01 | 0.50  | 3.08E-01 |
| LDB2       | 1.03 | 1.52E-01 | -0.32 | 6.26E-01 | 1.67  | 4.73E-02 |
| MMD        | 1.03 | 1.52E-01 | 0.60  | 2.73E-01 | 1.31  | 9.55E-02 |
| GPBP1      | 1.03 | 1.52E-01 | 0.71  | 2.40E-01 | -0.43 | 6.65E-01 |
| KRT83      | 1.03 | 1.52E-01 | 0.56  | 2.88E-01 | 0.20  | 4.21E-01 |
| PANX2      | 1.03 | 1.52E-01 | 1.32  | 9.34E-02 | 0.52  | 3.02E-01 |
| OR4D10     | 1.03 | 1.52E-01 | 1.21  | 1.13E-01 | -0.24 | 5.93E-01 |
| LRRCS2     | 1.03 | 1.52E-01 | 1.86  | 3.12E-02 | -1.03 | 8.49E-01 |
| CDH24      | 1.03 | 1.52E-01 | -0.94 | 8.25E-01 | 1.41  | 7.90E-02 |
| C22orf31   | 1.03 | 1.52E-01 | -0.80 | 7.87E-01 | 0.97  | 1.66E-01 |
| CBFA2T3    | 1.03 | 1.52E-01 | 0.79  | 2.16E-01 | -0.08 | 5.30E-01 |
| LUZP2      | 1.03 | 1.53E-01 | 2.15  | 1.59E-02 | -1.63 | 9.48E-01 |
| FGF22      | 1.03 | 1.53E-01 | -0.56 | 7.12E-01 | 1.01  | 1.57E-01 |
| TAAR1      | 1.03 | 1.53E-01 | 1.18  | 1.19E-01 | 0.18  | 4.29E-01 |
| FKBP3      | 1.03 | 1.53E-01 | 1.32  | 9.41E-02 | 0.11  | 4.56E-01 |
| EPGN       | 1.03 | 1.53E-01 | -0.60 | 7.25E-01 | 1.16  | 1.24E-01 |

|         |      |          |       |          |       |          |
|---------|------|----------|-------|----------|-------|----------|
| ENAM    | 1.02 | 1.53E-01 | -0.48 | 6.84E-01 | 1.25  | 1.07E-01 |
| CYP27A1 | 1.02 | 1.53E-01 | -0.83 | 7.96E-01 | 2.04  | 2.05E-02 |
| AEBP2   | 1.02 | 1.53E-01 | 2.40  | 8.09E-03 | -1.32 | 9.06E-01 |
| MICU2   | 1.02 | 1.53E-01 | 0.31  | 3.79E-01 | 0.46  | 3.22E-01 |
| BOLA1   | 1.02 | 1.53E-01 | 0.96  | 1.69E-01 | -0.39 | 6.50E-01 |
| CYBRD1  | 1.02 | 1.53E-01 | -0.65 | 7.41E-01 | 1.05  | 1.47E-01 |
| BTG4    | 1.02 | 1.53E-01 | 0.83  | 2.04E-01 | 0.78  | 2.18E-01 |
| NEK1    | 1.02 | 1.53E-01 | 0.51  | 3.04E-01 | 1.00  | 1.59E-01 |
| AAMP    | 1.02 | 1.53E-01 | 0.48  | 3.16E-01 | 0.21  | 4.17E-01 |
| DERL1   | 1.02 | 1.53E-01 | 1.04  | 1.49E-01 | 0.24  | 4.06E-01 |
| TIE1    | 1.02 | 1.53E-01 | 0.90  | 1.84E-01 | -0.37 | 6.46E-01 |
| GABRD   | 1.02 | 1.54E-01 | -0.77 | 7.80E-01 | 1.48  | 6.99E-02 |
| AMIGO2  | 1.02 | 1.54E-01 | -0.13 | 5.50E-01 | 0.67  | 2.50E-01 |
| OR8B2   | 1.02 | 1.54E-01 | 1.72  | 4.30E-02 | -1.57 | 9.42E-01 |
| ALKBH6  | 1.02 | 1.54E-01 | 2.59  | 4.80E-03 | -0.27 | 6.08E-01 |
| TBCA    | 1.02 | 1.54E-01 | -0.10 | 5.38E-01 | 0.79  | 2.15E-01 |
| C2orf91 | 1.02 | 1.54E-01 | -1.48 | 9.31E-01 | 1.71  | 4.40E-02 |
| ANKRD37 | 1.02 | 1.54E-01 | 0.34  | 3.66E-01 | 0.08  | 4.69E-01 |
| FAM229B | 1.02 | 1.54E-01 | 0.86  | 1.94E-01 | 0.39  | 3.48E-01 |
| RNF126  | 1.02 | 1.54E-01 | 0.53  | 2.99E-01 | 0.13  | 4.50E-01 |
| DEFB129 | 1.02 | 1.54E-01 | 0.54  | 2.94E-01 | 0.29  | 3.85E-01 |
| EIF4G1  | 1.02 | 1.54E-01 | -1.17 | 8.80E-01 | 2.00  | 2.28E-02 |
| RUNX3   | 1.02 | 1.54E-01 | 0.88  | 1.89E-01 | -0.12 | 5.47E-01 |
| TMC7    | 1.02 | 1.54E-01 | -0.29 | 6.14E-01 | 0.60  | 2.74E-01 |
| NUDT5   | 1.02 | 1.54E-01 | 1.81  | 3.53E-02 | 0.31  | 3.78E-01 |
| ZNF296  | 1.02 | 1.54E-01 | 0.97  | 1.65E-01 | 0.02  | 4.92E-01 |
| C1orf52 | 1.02 | 1.54E-01 | 0.87  | 1.92E-01 | -0.07 | 5.27E-01 |
| SLC9A2  | 1.02 | 1.54E-01 | -1.29 | 9.01E-01 | 2.01  | 2.24E-02 |
| KLK14   | 1.02 | 1.54E-01 | 1.39  | 8.25E-02 | -0.70 | 7.59E-01 |
| SSTR2   | 1.02 | 1.54E-01 | -0.52 | 7.00E-01 | 1.31  | 9.47E-02 |
| NKX2-8  | 1.02 | 1.54E-01 | 1.83  | 3.37E-02 | -0.69 | 7.56E-01 |

|          |      |          |       |          |       |          |
|----------|------|----------|-------|----------|-------|----------|
| GSTZ1    | 1.02 | 1.54E-01 | -0.06 | 5.23E-01 | -0.10 | 5.40E-01 |
| OR10W1   | 1.02 | 1.54E-01 | 0.76  | 2.23E-01 | 0.73  | 2.32E-01 |
| TMED9    | 1.02 | 1.55E-01 | 1.88  | 3.02E-02 | -0.12 | 5.49E-01 |
| SDHD     | 1.02 | 1.55E-01 | 0.32  | 3.73E-01 | 1.00  | 1.58E-01 |
| FBXO41   | 1.02 | 1.55E-01 | 1.21  | 1.13E-01 | -0.21 | 5.82E-01 |
| NCS1     | 1.02 | 1.55E-01 | 1.65  | 4.99E-02 | -1.47 | 9.29E-01 |
| TMEM17   | 1.02 | 1.55E-01 | 0.59  | 2.79E-01 | 1.59  | 5.63E-02 |
| FCRLB    | 1.02 | 1.55E-01 | 0.95  | 1.71E-01 | -1.56 | 9.41E-01 |
| ZNF33A   | 1.01 | 1.55E-01 | 0.64  | 2.62E-01 | 0.22  | 4.14E-01 |
| ZDHHHC13 | 1.01 | 1.55E-01 | 1.32  | 9.28E-02 | 0.67  | 2.51E-01 |
| DLX4     | 1.01 | 1.55E-01 | 1.14  | 1.27E-01 | 0.77  | 2.21E-01 |
| ODF2L    | 1.01 | 1.55E-01 | 1.51  | 6.51E-02 | -1.20 | 8.85E-01 |
| ISLR2    | 1.01 | 1.55E-01 | 0.52  | 3.02E-01 | 0.63  | 2.64E-01 |
| AKAP8L   | 1.01 | 1.55E-01 | 2.05  | 2.01E-02 | -0.42 | 6.62E-01 |
| ZNF654   | 1.01 | 1.56E-01 | 0.44  | 3.29E-01 | 0.09  | 4.63E-01 |
| PSCA     | 1.01 | 1.56E-01 | -1.03 | 8.48E-01 | 1.68  | 4.63E-02 |
| ECH1     | 1.01 | 1.56E-01 | 1.30  | 9.71E-02 | 0.96  | 1.68E-01 |
| INVS     | 1.01 | 1.56E-01 | 0.57  | 2.85E-01 | 0.54  | 2.95E-01 |
| MPRIP    | 1.01 | 1.56E-01 | 1.42  | 7.78E-02 | -1.71 | 9.56E-01 |
| AGPAT9   | 1.01 | 1.56E-01 | 0.51  | 3.05E-01 | 1.56  | 5.92E-02 |
| MTCH2    | 1.01 | 1.56E-01 | 1.64  | 5.05E-02 | -1.11 | 8.67E-01 |
| TPH1     | 1.01 | 1.56E-01 | 1.89  | 2.96E-02 | -0.34 | 6.32E-01 |
| RGS12    | 1.01 | 1.56E-01 | 1.94  | 2.59E-02 | -0.28 | 6.12E-01 |
| GSC2     | 1.01 | 1.56E-01 | 0.82  | 2.06E-01 | -0.12 | 5.47E-01 |
| C1orf65  | 1.01 | 1.56E-01 | 0.65  | 2.56E-01 | 0.35  | 3.65E-01 |
| CACTIN   | 1.01 | 1.56E-01 | 1.05  | 1.47E-01 | -0.29 | 6.14E-01 |
| FCER2    | 1.01 | 1.56E-01 | 2.33  | 1.00E-02 | -0.79 | 7.85E-01 |
| MYH7B    | 1.01 | 1.56E-01 | 1.23  | 1.09E-01 | -0.58 | 7.20E-01 |
| SS18L1   | 1.01 | 1.56E-01 | 0.58  | 2.80E-01 | 0.01  | 4.95E-01 |
| CHODL    | 1.01 | 1.56E-01 | -0.12 | 5.47E-01 | 0.54  | 2.94E-01 |
| CPSF3    | 1.01 | 1.56E-01 | -0.11 | 5.43E-01 | 1.83  | 3.37E-02 |

|          |      |          |       |          |       |          |
|----------|------|----------|-------|----------|-------|----------|
| TSSK4    | 1.01 | 1.56E-01 | 0.59  | 2.77E-01 | 0.84  | 2.00E-01 |
| FAM220A  | 1.01 | 1.56E-01 | -0.89 | 8.13E-01 | 1.74  | 4.11E-02 |
| GPR171   | 1.01 | 1.56E-01 | 1.29  | 9.83E-02 | -0.47 | 6.79E-01 |
| ZEB2     | 1.01 | 1.56E-01 | 0.32  | 3.74E-01 | 1.11  | 1.34E-01 |
| FAXC     | 1.01 | 1.56E-01 | -0.59 | 7.22E-01 | 0.86  | 1.94E-01 |
| SERPINA4 | 1.01 | 1.57E-01 | 1.27  | 1.02E-01 | -1.10 | 8.64E-01 |
| OR6S1    | 1.01 | 1.57E-01 | 1.25  | 1.06E-01 | -0.92 | 8.22E-01 |
| RASL12   | 1.01 | 1.57E-01 | 0.83  | 2.02E-01 | 1.07  | 1.42E-01 |
| RSPRY1   | 1.01 | 1.57E-01 | 0.24  | 4.06E-01 | 0.75  | 2.27E-01 |
| NARFL    | 1.01 | 1.57E-01 | 0.92  | 1.78E-01 | -0.32 | 6.24E-01 |
| C16orf74 | 1.01 | 1.57E-01 | -0.25 | 6.00E-01 | 1.12  | 1.32E-01 |
| CHST13   | 1.01 | 1.57E-01 | 0.05  | 4.79E-01 | 0.44  | 3.31E-01 |
| SENP8    | 1.01 | 1.57E-01 | 0.19  | 4.23E-01 | 0.68  | 2.47E-01 |
| ZNF385A  | 1.01 | 1.57E-01 | -0.01 | 5.06E-01 | 1.24  | 1.08E-01 |
| XRN2     | 1.01 | 1.57E-01 | 1.08  | 1.41E-01 | 0.39  | 3.48E-01 |
| DLST     | 1.01 | 1.57E-01 | 1.25  | 1.06E-01 | 0.26  | 3.96E-01 |
| C18orf54 | 1.01 | 1.57E-01 | 0.18  | 4.27E-01 | 0.58  | 2.81E-01 |
| ASB5     | 1.01 | 1.57E-01 | 1.37  | 8.53E-02 | -0.68 | 7.52E-01 |
| TRIQQ    | 1.01 | 1.57E-01 | 0.71  | 2.38E-01 | -0.45 | 6.74E-01 |
| SMEK1    | 1.01 | 1.57E-01 | -1.16 | 8.78E-01 | 1.81  | 3.54E-02 |
| LITAF    | 1.01 | 1.57E-01 | 2.56  | 5.20E-03 | -0.53 | 7.01E-01 |
| AMPD2    | 1.01 | 1.57E-01 | 1.78  | 3.78E-02 | -1.11 | 8.66E-01 |
| TIMD4    | 1.01 | 1.57E-01 | -0.54 | 7.05E-01 | 1.91  | 2.78E-02 |
| KDM7A    | 1.00 | 1.58E-01 | -1.22 | 8.88E-01 | 1.35  | 8.77E-02 |
| CNGA4    | 1.00 | 1.58E-01 | 1.46  | 7.16E-02 | -1.05 | 8.54E-01 |
| TMEM2    | 1.00 | 1.58E-01 | -0.91 | 8.19E-01 | 1.60  | 5.50E-02 |
| ZFPM1    | 1.00 | 1.58E-01 | -0.55 | 7.10E-01 | 1.76  | 3.88E-02 |
| MAPT     | 1.00 | 1.58E-01 | 1.61  | 5.36E-02 | -0.93 | 8.23E-01 |
| PTN      | 1.00 | 1.58E-01 | -0.10 | 5.40E-01 | 1.10  | 1.36E-01 |
| KEAP1    | 1.00 | 1.58E-01 | 0.66  | 2.54E-01 | 0.05  | 4.78E-01 |
| LSM5     | 1.00 | 1.58E-01 | 0.25  | 4.01E-01 | 0.65  | 2.59E-01 |



|           |      |          |       |          |       |          |
|-----------|------|----------|-------|----------|-------|----------|
| SERPINA5  | 1.00 | 1.58E-01 | 1.14  | 1.28E-01 | -1.40 | 9.19E-01 |
| HERPUD2   | 1.00 | 1.58E-01 | 0.39  | 3.49E-01 | 0.00  | 5.00E-01 |
| TANK      | 1.00 | 1.58E-01 | 1.67  | 4.73E-02 | -0.39 | 6.53E-01 |
| DCAF13    | 1.00 | 1.58E-01 | 1.18  | 1.18E-01 | -0.28 | 6.12E-01 |
| EHD4      | 1.00 | 1.58E-01 | -0.54 | 7.06E-01 | 0.33  | 3.69E-01 |
| TRIB1     | 1.00 | 1.58E-01 | 0.20  | 4.19E-01 | 0.41  | 3.39E-01 |
| HUS1      | 1.00 | 1.58E-01 | -0.77 | 7.79E-01 | 1.36  | 8.63E-02 |
| MAMSTR    | 1.00 | 1.58E-01 | -0.15 | 5.59E-01 | 0.92  | 1.78E-01 |
| EDN3      | 1.00 | 1.58E-01 | 0.64  | 2.62E-01 | 0.78  | 2.18E-01 |
| TBC1D5    | 1.00 | 1.58E-01 | -0.77 | 7.78E-01 | 1.80  | 3.58E-02 |
| C20orf141 | 1.00 | 1.58E-01 | 0.86  | 1.96E-01 | -0.10 | 5.39E-01 |
| EPB41L5   | 1.00 | 1.58E-01 | 0.87  | 1.93E-01 | 0.22  | 4.12E-01 |
| MRPL10    | 1.00 | 1.58E-01 | 0.17  | 4.31E-01 | 0.85  | 1.96E-01 |
| ESPL1     | 1.00 | 1.59E-01 | 1.25  | 1.05E-01 | -0.63 | 7.36E-01 |
| RAB3IL1   | 1.00 | 1.59E-01 | -0.84 | 7.99E-01 | 1.34  | 9.09E-02 |
| IRX2      | 1.00 | 1.59E-01 | 0.26  | 3.98E-01 | 0.75  | 2.26E-01 |
| HMCN1     | 1.00 | 1.59E-01 | 0.88  | 1.90E-01 | -0.06 | 5.25E-01 |
| ITM2B     | 1.00 | 1.59E-01 | -0.72 | 7.65E-01 | 1.13  | 1.29E-01 |
| TNFAIP8L3 | 1.00 | 1.59E-01 | 0.77  | 2.22E-01 | 0.11  | 4.57E-01 |
| IKBKAP    | 1.00 | 1.59E-01 | 1.49  | 6.81E-02 | -1.57 | 9.41E-01 |
| SLC6A1    | 1.00 | 1.59E-01 | 0.29  | 3.87E-01 | 1.33  | 9.20E-02 |
| C5orf30   | 1.00 | 1.59E-01 | -0.15 | 5.60E-01 | 1.14  | 1.27E-01 |
| USP44     | 1.00 | 1.59E-01 | 1.16  | 1.23E-01 | -0.22 | 5.88E-01 |
| CDH20     | 1.00 | 1.59E-01 | -0.62 | 7.32E-01 | 0.29  | 3.88E-01 |
| ZNF616    | 1.00 | 1.59E-01 | -0.53 | 7.01E-01 | 0.96  | 1.68E-01 |
| SLC10A5   | 1.00 | 1.59E-01 | 0.27  | 3.93E-01 | 1.14  | 1.27E-01 |
| ZNF48     | 1.00 | 1.59E-01 | 0.66  | 2.54E-01 | 0.14  | 4.42E-01 |
| CTDP1     | 1.00 | 1.59E-01 | 0.45  | 3.27E-01 | 1.59  | 5.60E-02 |
| FAM192A   | 1.00 | 1.59E-01 | 0.62  | 2.66E-01 | 0.54  | 2.95E-01 |
| C6orf201  | 1.00 | 1.59E-01 | 1.32  | 9.40E-02 | 0.16  | 4.38E-01 |
| ABLIM2    | 1.00 | 1.59E-01 | 0.05  | 4.78E-01 | 1.59  | 5.54E-02 |

|          |      |          |       |          |       |          |
|----------|------|----------|-------|----------|-------|----------|
| KRT20    | 1.00 | 1.59E-01 | -0.35 | 6.38E-01 | 1.09  | 1.38E-01 |
| ACPT     | 1.00 | 1.59E-01 | 0.36  | 3.58E-01 | 0.84  | 2.01E-01 |
| ZSCAN16  | 1.00 | 1.59E-01 | 0.61  | 2.72E-01 | 0.58  | 2.80E-01 |
| EPS15    | 1.00 | 1.59E-01 | -1.01 | 8.43E-01 | 1.24  | 1.07E-01 |
| POLDIP3  | 1.00 | 1.60E-01 | 0.27  | 3.94E-01 | 0.77  | 2.20E-01 |
| ASPH     | 1.00 | 1.60E-01 | 0.67  | 2.53E-01 | 0.46  | 3.23E-01 |
| COLEC12  | 1.00 | 1.60E-01 | -0.54 | 7.05E-01 | 0.15  | 4.40E-01 |
| KIF18B   | 1.00 | 1.60E-01 | 0.84  | 2.01E-01 | -0.03 | 5.10E-01 |
| SFXN2    | 1.00 | 1.60E-01 | 0.14  | 4.44E-01 | 1.36  | 8.76E-02 |
| NBAS     | 1.00 | 1.60E-01 | 0.68  | 2.49E-01 | 0.14  | 4.46E-01 |
| ADH7     | 0.99 | 1.60E-01 | 0.13  | 4.47E-01 | -0.27 | 6.08E-01 |
| ZNRF1    | 0.99 | 1.60E-01 | 0.31  | 3.77E-01 | 0.86  | 1.94E-01 |
| OTOS     | 0.99 | 1.60E-01 | -0.67 | 7.48E-01 | 1.54  | 6.21E-02 |
| USP43    | 0.99 | 1.60E-01 | 0.01  | 4.95E-01 | -0.06 | 5.23E-01 |
| ABHD5    | 0.99 | 1.60E-01 | -0.44 | 6.70E-01 | 0.76  | 2.23E-01 |
| CUX1     | 0.99 | 1.60E-01 | 0.36  | 3.61E-01 | 0.72  | 2.36E-01 |
| GRIK2    | 0.99 | 1.60E-01 | 1.04  | 1.50E-01 | -1.56 | 9.40E-01 |
| TMEM217  | 0.99 | 1.60E-01 | 0.91  | 1.81E-01 | 2.72  | 3.28E-03 |
| MYO1F    | 0.99 | 1.60E-01 | -0.34 | 6.32E-01 | 1.13  | 1.28E-01 |
| TLX1NB   | 0.99 | 1.60E-01 | 0.10  | 4.59E-01 | 0.53  | 2.98E-01 |
| TXN2     | 0.99 | 1.60E-01 | 0.15  | 4.42E-01 | 1.05  | 1.47E-01 |
| CCDC97   | 0.99 | 1.60E-01 | 1.00  | 1.58E-01 | -0.82 | 7.95E-01 |
| PSMD2    | 0.99 | 1.61E-01 | 0.37  | 3.54E-01 | 0.38  | 3.54E-01 |
| CCR1     | 0.99 | 1.61E-01 | 0.35  | 3.62E-01 | 0.36  | 3.60E-01 |
| C6orf100 | 0.99 | 1.61E-01 | 1.26  | 1.04E-01 | 0.57  | 2.85E-01 |
| HS6ST3   | 0.99 | 1.61E-01 | -0.01 | 5.05E-01 | 0.45  | 3.27E-01 |
| SYNPO    | 0.99 | 1.61E-01 | 0.33  | 3.71E-01 | 0.22  | 4.14E-01 |
| BAP1     | 0.99 | 1.61E-01 | 0.09  | 4.64E-01 | 1.40  | 8.07E-02 |
| RAD23A   | 0.99 | 1.61E-01 | -0.50 | 6.93E-01 | 1.12  | 1.31E-01 |
| ZNF85    | 0.99 | 1.61E-01 | -0.06 | 5.24E-01 | 0.91  | 1.81E-01 |
| OR6T1    | 0.99 | 1.61E-01 | 0.43  | 3.34E-01 | 0.51  | 3.04E-01 |

|         |      |          |       |          |       |          |
|---------|------|----------|-------|----------|-------|----------|
| RASA1   | 0.99 | 1.61E-01 | 1.42  | 7.82E-02 | -1.50 | 9.33E-01 |
| 43161   | 0.99 | 1.61E-01 | 0.34  | 3.67E-01 | 0.45  | 3.28E-01 |
| UNC80   | 0.99 | 1.61E-01 | 1.61  | 5.33E-02 | -1.32 | 9.07E-01 |
| STK31   | 0.99 | 1.61E-01 | -0.22 | 5.87E-01 | 2.07  | 1.92E-02 |
| FAM118A | 0.99 | 1.61E-01 | 0.78  | 2.18E-01 | 0.07  | 4.72E-01 |
| FIG4    | 0.99 | 1.61E-01 | -0.16 | 5.62E-01 | 1.61  | 5.35E-02 |
| CCL1    | 0.99 | 1.61E-01 | -1.07 | 8.58E-01 | 1.37  | 8.48E-02 |
| STARD3  | 0.99 | 1.61E-01 | -0.09 | 5.36E-01 | 1.18  | 1.18E-01 |
| CD8B    | 0.99 | 1.61E-01 | -0.88 | 8.11E-01 | 1.73  | 4.22E-02 |
| PRRC1   | 0.99 | 1.61E-01 | 1.86  | 3.13E-02 | -0.81 | 7.92E-01 |
| RQCD1   | 0.99 | 1.61E-01 | -0.69 | 7.54E-01 | 1.96  | 2.51E-02 |
| ERMN    | 0.99 | 1.61E-01 | -0.40 | 6.55E-01 | 1.73  | 4.16E-02 |
| TRIML2  | 0.99 | 1.61E-01 | 1.85  | 3.22E-02 | 0.66  | 2.56E-01 |
| LIN37   | 0.99 | 1.62E-01 | -0.85 | 8.02E-01 | 1.88  | 3.01E-02 |
| TAOK1   | 0.99 | 1.62E-01 | 1.54  | 6.14E-02 | 0.72  | 2.35E-01 |
| CCDC125 | 0.99 | 1.62E-01 | -1.16 | 8.77E-01 | 1.39  | 8.26E-02 |
| FKBP15  | 0.99 | 1.62E-01 | 0.42  | 3.37E-01 | 1.75  | 3.97E-02 |
| VPS37C  | 0.99 | 1.62E-01 | 0.46  | 3.24E-01 | 0.10  | 4.59E-01 |
| SPG200S | 0.99 | 1.62E-01 | 2.06  | 1.98E-02 | -1.10 | 8.65E-01 |
| EN1     | 0.99 | 1.62E-01 | -0.15 | 5.61E-01 | 1.58  | 5.65E-02 |
| SLC17A3 | 0.99 | 1.62E-01 | 0.77  | 2.21E-01 | -0.62 | 7.31E-01 |
| PLEKHJ1 | 0.99 | 1.62E-01 | 0.90  | 1.85E-01 | -0.39 | 6.50E-01 |
| OR2A12  | 0.99 | 1.62E-01 | 0.79  | 2.16E-01 | 0.14  | 4.44E-01 |
| EBI3    | 0.99 | 1.62E-01 | -0.80 | 7.89E-01 | 1.78  | 3.77E-02 |
| NMRK2   | 0.99 | 1.62E-01 | -1.71 | 9.56E-01 | 1.64  | 5.01E-02 |
| ELF1    | 0.99 | 1.62E-01 | 0.71  | 2.40E-01 | -0.78 | 7.83E-01 |
| TRAF6   | 0.99 | 1.62E-01 | -0.77 | 7.79E-01 | 1.56  | 5.88E-02 |
| NTRK3   | 0.99 | 1.62E-01 | 0.28  | 3.91E-01 | -0.81 | 7.90E-01 |
| EIF2D   | 0.99 | 1.62E-01 | 1.79  | 3.63E-02 | 0.32  | 3.75E-01 |
| UCKL1   | 0.99 | 1.62E-01 | 1.17  | 1.21E-01 | -1.14 | 8.72E-01 |
| SFSWAP  | 0.98 | 1.62E-01 | 2.99  | 1.38E-03 | -1.04 | 8.51E-01 |

|          |      |          |       |          |       |          |
|----------|------|----------|-------|----------|-------|----------|
| HMGN3    | 0.98 | 1.63E-01 | 0.68  | 2.49E-01 | 0.64  | 2.61E-01 |
| KBTBD13  | 0.98 | 1.63E-01 | 0.91  | 1.81E-01 | 0.16  | 4.36E-01 |
| C11orf85 | 0.98 | 1.63E-01 | -0.83 | 7.97E-01 | 1.25  | 1.06E-01 |
| C2orf42  | 0.98 | 1.63E-01 | 0.62  | 2.69E-01 | 0.04  | 4.84E-01 |
| SH3BP5L  | 0.98 | 1.63E-01 | 1.26  | 1.04E-01 | -0.74 | 7.71E-01 |
| YWHAQ    | 0.98 | 1.63E-01 | -1.43 | 9.23E-01 | 2.76  | 2.85E-03 |
| DNAAF3   | 0.98 | 1.63E-01 | 1.92  | 2.77E-02 | -1.11 | 8.66E-01 |
| SLAIN1   | 0.98 | 1.63E-01 | 0.23  | 4.08E-01 | -0.35 | 6.35E-01 |
| GRK6     | 0.98 | 1.63E-01 | 1.65  | 4.93E-02 | -0.67 | 7.47E-01 |
| ZNF426   | 0.98 | 1.63E-01 | -1.31 | 9.05E-01 | 1.86  | 3.14E-02 |
| OR52B4   | 0.98 | 1.63E-01 | -0.15 | 5.61E-01 | 1.16  | 1.22E-01 |
| SYT5     | 0.98 | 1.63E-01 | 1.84  | 3.28E-02 | -1.42 | 9.22E-01 |
| RAD21L1  | 0.98 | 1.63E-01 | 0.84  | 2.00E-01 | 0.89  | 1.87E-01 |
| CRYBB1   | 0.98 | 1.63E-01 | 1.64  | 5.00E-02 | -0.98 | 8.37E-01 |
| ABI1     | 0.98 | 1.63E-01 | 0.90  | 1.85E-01 | -0.79 | 7.84E-01 |
| MIA2     | 0.98 | 1.63E-01 | -0.17 | 5.67E-01 | 1.40  | 8.11E-02 |
| FAM83A   | 0.98 | 1.63E-01 | 1.20  | 1.14E-01 | -0.41 | 6.57E-01 |
| NAB2     | 0.98 | 1.63E-01 | 2.40  | 8.21E-03 | -0.27 | 6.05E-01 |
| CYP1B1   | 0.98 | 1.63E-01 | 0.53  | 2.97E-01 | 0.68  | 2.48E-01 |
| AVPR1A   | 0.98 | 1.63E-01 | 1.87  | 3.06E-02 | 1.85  | 3.19E-02 |
| PRPF40A  | 0.98 | 1.64E-01 | 1.47  | 7.03E-02 | -0.63 | 7.37E-01 |
| DCBLD2   | 0.98 | 1.64E-01 | -0.09 | 5.37E-01 | 2.32  | 1.02E-02 |
| FAM162B  | 0.98 | 1.64E-01 | 1.04  | 1.50E-01 | -0.36 | 6.39E-01 |
| TLR1     | 0.98 | 1.64E-01 | 1.06  | 1.44E-01 | 0.73  | 2.34E-01 |
| DAPL1    | 0.98 | 1.64E-01 | 1.39  | 8.15E-02 | 0.20  | 4.20E-01 |
| MIB2     | 0.98 | 1.64E-01 | 0.73  | 2.33E-01 | -0.33 | 6.28E-01 |
| TSHB     | 0.98 | 1.64E-01 | 0.25  | 4.00E-01 | 0.32  | 3.73E-01 |
| C14orf28 | 0.98 | 1.64E-01 | 0.24  | 4.06E-01 | 0.70  | 2.42E-01 |
| CECR2    | 0.98 | 1.64E-01 | 0.13  | 4.47E-01 | 0.05  | 4.81E-01 |
| DRG2     | 0.98 | 1.64E-01 | 1.46  | 7.24E-02 | -0.61 | 7.30E-01 |
| FAM124A  | 0.98 | 1.64E-01 | -0.71 | 7.62E-01 | 1.15  | 1.24E-01 |

|            |      |          |       |          |       |          |
|------------|------|----------|-------|----------|-------|----------|
| PIGK       | 0.98 | 1.64E-01 | 0.71  | 2.40E-01 | 1.01  | 1.57E-01 |
| REXO2      | 0.98 | 1.64E-01 | 0.70  | 2.42E-01 | -0.35 | 6.36E-01 |
| SLC5A5     | 0.98 | 1.64E-01 | -1.01 | 8.43E-01 | 1.30  | 9.64E-02 |
| PIK3R1     | 0.98 | 1.64E-01 | 0.31  | 3.80E-01 | 0.78  | 2.17E-01 |
| PRMT6      | 0.98 | 1.64E-01 | -0.55 | 7.09E-01 | 1.66  | 4.83E-02 |
| CCL11      | 0.98 | 1.64E-01 | 0.60  | 2.75E-01 | 0.47  | 3.19E-01 |
| STK36      | 0.98 | 1.64E-01 | -0.96 | 8.32E-01 | 1.67  | 4.75E-02 |
| AC131097.4 | 0.98 | 1.64E-01 | 0.05  | 4.78E-01 | 1.23  | 1.10E-01 |
| PMM2       | 0.98 | 1.64E-01 | 0.08  | 4.67E-01 | 1.65  | 4.91E-02 |
| PSPC1      | 0.98 | 1.65E-01 | 1.20  | 1.16E-01 | -0.63 | 7.34E-01 |
| MSTN       | 0.98 | 1.65E-01 | 0.78  | 2.19E-01 | 0.26  | 3.96E-01 |
| TFPI       | 0.98 | 1.65E-01 | 0.78  | 2.19E-01 | 1.32  | 9.34E-02 |
| POR        | 0.97 | 1.65E-01 | -0.74 | 7.71E-01 | 1.38  | 8.41E-02 |
| MAP3K13    | 0.97 | 1.65E-01 | 1.01  | 1.57E-01 | 0.38  | 3.52E-01 |
| KRTAP3-2   | 0.97 | 1.65E-01 | 1.71  | 4.32E-02 | 0.96  | 1.69E-01 |
| HR         | 0.97 | 1.65E-01 | 1.01  | 1.55E-01 | -0.18 | 5.70E-01 |
| COQ5       | 0.97 | 1.65E-01 | 0.58  | 2.80E-01 | -0.15 | 5.60E-01 |
| RPL17      | 0.97 | 1.65E-01 | 0.70  | 2.41E-01 | 0.71  | 2.38E-01 |
| PGM5       | 0.97 | 1.65E-01 | 0.28  | 3.91E-01 | 0.66  | 2.54E-01 |
| APC2       | 0.97 | 1.65E-01 | 2.01  | 2.20E-02 | -0.62 | 7.32E-01 |
| STH        | 0.97 | 1.65E-01 | 1.65  | 4.98E-02 | -2.22 | 9.87E-01 |
| BCL2       | 0.97 | 1.65E-01 | -0.12 | 5.50E-01 | 0.47  | 3.20E-01 |
| SEC61G     | 0.97 | 1.65E-01 | -0.28 | 6.12E-01 | 1.26  | 1.05E-01 |
| LAPTM4B    | 0.97 | 1.66E-01 | 1.51  | 6.60E-02 | 0.14  | 4.44E-01 |
| PDE3B      | 0.97 | 1.66E-01 | 0.64  | 2.62E-01 | 0.58  | 2.80E-01 |
| MEA1       | 0.97 | 1.66E-01 | 1.94  | 2.59E-02 | 0.13  | 4.49E-01 |
| TMEM30B    | 0.97 | 1.66E-01 | 0.35  | 3.65E-01 | 1.59  | 5.63E-02 |
| HOXC8      | 0.97 | 1.66E-01 | 0.03  | 4.86E-01 | 0.81  | 2.09E-01 |
| TMEM18     | 0.97 | 1.66E-01 | 1.72  | 4.25E-02 | -1.84 | 9.67E-01 |
| PIP5K1C    | 0.97 | 1.66E-01 | 1.39  | 8.24E-02 | -1.04 | 8.50E-01 |
| TM4SF19    | 0.97 | 1.66E-01 | -1.01 | 8.44E-01 | 1.52  | 6.48E-02 |

|           |      |          |       |          |       |          |
|-----------|------|----------|-------|----------|-------|----------|
| HYAL4     | 0.97 | 1.66E-01 | 0.78  | 2.19E-01 | 0.41  | 3.41E-01 |
| HIST2H2BE | 0.97 | 1.66E-01 | 0.86  | 1.95E-01 | -0.35 | 6.36E-01 |
| DCUN1D5   | 0.97 | 1.66E-01 | 0.26  | 3.99E-01 | 0.56  | 2.87E-01 |
| CDH15     | 0.97 | 1.66E-01 | 1.04  | 1.50E-01 | -0.22 | 5.87E-01 |
| TYW3      | 0.97 | 1.66E-01 | -0.11 | 5.42E-01 | 1.12  | 1.32E-01 |
| NUDT3     | 0.97 | 1.66E-01 | 0.51  | 3.04E-01 | 0.39  | 3.49E-01 |
| NAPA      | 0.97 | 1.66E-01 | 1.88  | 3.00E-02 | -0.74 | 7.71E-01 |
| RPSAP58   | 0.97 | 1.66E-01 | 1.85  | 3.25E-02 | -1.44 | 9.25E-01 |
| ZFYVE9    | 0.97 | 1.66E-01 | 0.42  | 3.38E-01 | 0.45  | 3.25E-01 |
| MRAP2     | 0.97 | 1.67E-01 | 0.83  | 2.02E-01 | -0.25 | 5.97E-01 |
| BBS4      | 0.97 | 1.67E-01 | 1.65  | 4.92E-02 | 1.07  | 1.41E-01 |
| NXPE4     | 0.97 | 1.67E-01 | 0.60  | 2.75E-01 | 0.11  | 4.57E-01 |
| BICC1     | 0.97 | 1.67E-01 | 0.27  | 3.95E-01 | 0.42  | 3.39E-01 |
| R3HCC1L   | 0.97 | 1.67E-01 | 0.61  | 2.70E-01 | 0.81  | 2.09E-01 |
| DDA1      | 0.97 | 1.67E-01 | 2.14  | 1.63E-02 | -0.12 | 5.48E-01 |
| RNF207    | 0.97 | 1.67E-01 | 1.31  | 9.44E-02 | -0.94 | 8.25E-01 |
| CBWD1     | 0.97 | 1.67E-01 | 0.96  | 1.68E-01 | -0.37 | 6.45E-01 |
| RAB37     | 0.97 | 1.67E-01 | 1.26  | 1.03E-01 | -1.36 | 9.13E-01 |
| HIGD2B    | 0.97 | 1.67E-01 | 2.15  | 1.56E-02 | 1.39  | 8.19E-02 |
| RGL2      | 0.97 | 1.67E-01 | 0.68  | 2.49E-01 | 0.94  | 1.73E-01 |
| KMT2C     | 0.97 | 1.67E-01 | 0.93  | 1.76E-01 | 0.01  | 4.95E-01 |
| SLC5A2    | 0.97 | 1.67E-01 | -0.11 | 5.45E-01 | 0.68  | 2.48E-01 |
| WHSC1     | 0.96 | 1.67E-01 | 0.22  | 4.14E-01 | 0.16  | 4.37E-01 |
| BCL2L1    | 0.96 | 1.67E-01 | -1.15 | 8.76E-01 | 2.05  | 2.02E-02 |
| MC3R      | 0.96 | 1.68E-01 | 0.68  | 2.47E-01 | 0.25  | 4.02E-01 |
| PHYHIP1L  | 0.96 | 1.68E-01 | -0.78 | 7.82E-01 | 1.35  | 8.84E-02 |
| GFM2      | 0.96 | 1.68E-01 | 0.39  | 3.47E-01 | -0.16 | 5.62E-01 |
| RAG1      | 0.96 | 1.68E-01 | -1.49 | 9.32E-01 | 1.78  | 3.78E-02 |
| ZCWPW2    | 0.96 | 1.68E-01 | -0.08 | 5.34E-01 | 1.45  | 7.40E-02 |
| TRMT12    | 0.96 | 1.68E-01 | 0.28  | 3.89E-01 | -0.16 | 5.62E-01 |
| RNF223    | 0.96 | 1.68E-01 | 1.43  | 7.64E-02 | -0.73 | 7.66E-01 |

|         |      |          |       |          |       |          |
|---------|------|----------|-------|----------|-------|----------|
| PTPRO   | 0.96 | 1.68E-01 | 0.68  | 2.50E-01 | -0.54 | 7.07E-01 |
| VPS45   | 0.96 | 1.68E-01 | 1.02  | 1.53E-01 | -0.51 | 6.96E-01 |
| DDX52   | 0.96 | 1.68E-01 | 1.02  | 1.53E-01 | -0.85 | 8.02E-01 |
| ZNF90   | 0.96 | 1.68E-01 | 0.21  | 4.15E-01 | -0.08 | 5.32E-01 |
| TRIM77  | 0.96 | 1.68E-01 | 0.37  | 3.57E-01 | 0.49  | 3.12E-01 |
| SFRP4   | 0.96 | 1.68E-01 | 0.50  | 3.09E-01 | 0.62  | 2.69E-01 |
| ARPC2   | 0.96 | 1.68E-01 | 0.31  | 3.77E-01 | 0.07  | 4.71E-01 |
| 43345   | 0.96 | 1.68E-01 | -0.62 | 7.33E-01 | 0.44  | 3.29E-01 |
| PLK4    | 0.96 | 1.69E-01 | 1.01  | 1.57E-01 | 0.53  | 2.99E-01 |
| KLC2    | 0.96 | 1.69E-01 | 1.00  | 1.59E-01 | -0.05 | 5.19E-01 |
| ARHGAP9 | 0.96 | 1.69E-01 | 0.55  | 2.91E-01 | -0.39 | 6.51E-01 |
| PIANP   | 0.96 | 1.69E-01 | -0.08 | 5.33E-01 | 0.89  | 1.88E-01 |
| ZNF709  | 0.96 | 1.69E-01 | 0.19  | 4.25E-01 | -0.15 | 5.62E-01 |
| MMP17   | 0.96 | 1.69E-01 | 2.22  | 1.30E-02 | 0.17  | 4.32E-01 |
| PATE4   | 0.96 | 1.69E-01 | 0.77  | 2.21E-01 | -0.88 | 8.10E-01 |
| GJE1    | 0.96 | 1.69E-01 | -0.25 | 6.00E-01 | 0.86  | 1.95E-01 |
| GEMIN2  | 0.96 | 1.69E-01 | -0.56 | 7.14E-01 | 1.84  | 3.29E-02 |
| CYB5D1  | 0.96 | 1.69E-01 | 2.00  | 2.26E-02 | 0.82  | 2.06E-01 |
| ELOVL7  | 0.96 | 1.70E-01 | -0.72 | 7.65E-01 | 1.84  | 3.26E-02 |
| BSPH1   | 0.96 | 1.70E-01 | 1.16  | 1.22E-01 | 0.13  | 4.49E-01 |
| SF3B2   | 0.95 | 1.70E-01 | 0.88  | 1.88E-01 | -0.78 | 7.84E-01 |
| CEP55   | 0.95 | 1.70E-01 | -0.81 | 7.91E-01 | 1.42  | 7.80E-02 |
| ZNF229  | 0.95 | 1.70E-01 | 0.67  | 2.52E-01 | 0.31  | 3.79E-01 |
| IGF2BP1 | 0.95 | 1.70E-01 | 1.56  | 5.97E-02 | -0.66 | 7.46E-01 |
| RALGPS2 | 0.95 | 1.70E-01 | 1.24  | 1.08E-01 | -0.05 | 5.20E-01 |
| ART1    | 0.95 | 1.70E-01 | 1.49  | 6.85E-02 | 0.19  | 4.24E-01 |
| P2RX1   | 0.95 | 1.70E-01 | 0.91  | 1.82E-01 | -0.34 | 6.32E-01 |
| SLC10A6 | 0.95 | 1.70E-01 | 1.57  | 5.80E-02 | -0.79 | 7.84E-01 |
| PEPD    | 0.95 | 1.70E-01 | 1.07  | 1.43E-01 | -1.27 | 8.97E-01 |
| SLC5A3  | 0.95 | 1.70E-01 | 1.62  | 5.23E-02 | 0.16  | 4.37E-01 |
| SLC5A3  | 0.95 | 1.70E-01 | 1.62  | 5.23E-02 | 0.16  | 4.37E-01 |

|          |      |          |       |          |       |          |
|----------|------|----------|-------|----------|-------|----------|
| CKAP5    | 0.95 | 1.70E-01 | 0.32  | 3.74E-01 | 1.36  | 8.73E-02 |
| C1orf134 | 0.95 | 1.70E-01 | 0.21  | 4.16E-01 | 0.39  | 3.47E-01 |
| ZNF138   | 0.95 | 1.70E-01 | 1.02  | 1.53E-01 | -1.10 | 8.63E-01 |
| OR6K2    | 0.95 | 1.70E-01 | -1.04 | 8.50E-01 | 1.74  | 4.07E-02 |
| TRIM50   | 0.95 | 1.70E-01 | -0.12 | 5.49E-01 | 1.33  | 9.22E-02 |
| SCUBE2   | 0.95 | 1.70E-01 | -0.71 | 7.61E-01 | 1.29  | 9.83E-02 |
| FAM13C   | 0.95 | 1.71E-01 | 0.37  | 3.57E-01 | 1.05  | 1.46E-01 |
| CRHR1    | 0.95 | 1.71E-01 | 1.67  | 4.76E-02 | -1.20 | 8.84E-01 |
| CAB39L   | 0.95 | 1.71E-01 | 1.82  | 3.41E-02 | -1.69 | 9.55E-01 |
| CT62     | 0.95 | 1.71E-01 | -0.05 | 5.21E-01 | 0.48  | 3.16E-01 |
| SLC18A2  | 0.95 | 1.71E-01 | 0.79  | 2.13E-01 | -0.22 | 5.88E-01 |
| AMH      | 0.95 | 1.71E-01 | 0.79  | 2.14E-01 | 0.25  | 4.01E-01 |
| ZNF589   | 0.95 | 1.71E-01 | 1.71  | 4.35E-02 | -0.91 | 8.18E-01 |
| CCDC88A  | 0.95 | 1.71E-01 | 0.11  | 4.56E-01 | 0.23  | 4.09E-01 |
| GALK2    | 0.95 | 1.71E-01 | -0.34 | 6.32E-01 | 0.64  | 2.62E-01 |
| KRT38    | 0.95 | 1.71E-01 | 0.52  | 3.03E-01 | -0.41 | 6.61E-01 |
| IPO13    | 0.95 | 1.71E-01 | 1.95  | 2.55E-02 | -1.03 | 8.49E-01 |
| FAM184A  | 0.95 | 1.71E-01 | -0.08 | 5.33E-01 | 2.29  | 1.09E-02 |
| C12orf60 | 0.95 | 1.71E-01 | -0.24 | 5.93E-01 | 0.66  | 2.55E-01 |
| ADAMTSL2 | 0.95 | 1.71E-01 | 0.79  | 2.15E-01 | -0.52 | 6.98E-01 |
| UTP3     | 0.95 | 1.71E-01 | 0.43  | 3.34E-01 | 0.50  | 3.10E-01 |
| FAM84A   | 0.95 | 1.71E-01 | 1.63  | 5.11E-02 | -0.84 | 7.99E-01 |
| MBTPS1   | 0.95 | 1.71E-01 | 1.10  | 1.36E-01 | 0.79  | 2.16E-01 |
| CDON     | 0.95 | 1.71E-01 | -0.70 | 7.57E-01 | 0.66  | 2.56E-01 |
| ALOX15   | 0.95 | 1.71E-01 | -0.42 | 6.63E-01 | 1.26  | 1.04E-01 |
| ZNF121   | 0.95 | 1.71E-01 | -0.88 | 8.12E-01 | 1.78  | 3.72E-02 |
| VGLL4    | 0.95 | 1.71E-01 | 1.48  | 6.94E-02 | -1.19 | 8.84E-01 |
| LZTS2    | 0.95 | 1.71E-01 | -0.50 | 6.90E-01 | 1.10  | 1.35E-01 |
| PLA2G2A  | 0.95 | 1.71E-01 | -0.05 | 5.18E-01 | 1.64  | 5.01E-02 |
| SHCBP1   | 0.95 | 1.71E-01 | 0.46  | 3.23E-01 | 0.14  | 4.43E-01 |
| ABCC9    | 0.95 | 1.71E-01 | 1.41  | 7.87E-02 | -0.83 | 7.95E-01 |



|            |      |          |       |          |       |          |
|------------|------|----------|-------|----------|-------|----------|
| TDRD5      | 0.95 | 1.71E-01 | -0.67 | 7.48E-01 | 2.05  | 2.00E-02 |
| ZMYND10    | 0.95 | 1.71E-01 | 1.59  | 5.58E-02 | -1.65 | 9.51E-01 |
| C1QTNF2    | 0.95 | 1.72E-01 | -0.14 | 5.56E-01 | 0.86  | 1.95E-01 |
| TPX2       | 0.95 | 1.72E-01 | -1.43 | 9.23E-01 | 2.11  | 1.73E-02 |
| SH3GL3     | 0.95 | 1.72E-01 | 0.04  | 4.86E-01 | 0.89  | 1.86E-01 |
| CALML6     | 0.95 | 1.72E-01 | 1.41  | 7.93E-02 | 0.61  | 2.72E-01 |
| HMX2       | 0.95 | 1.72E-01 | 1.17  | 1.21E-01 | -0.55 | 7.09E-01 |
| PARP10     | 0.95 | 1.72E-01 | 2.23  | 1.30E-02 | -0.47 | 6.82E-01 |
| PLEKHS1    | 0.95 | 1.72E-01 | -1.41 | 9.21E-01 | 1.31  | 9.53E-02 |
| CHKB-CPT1B | 0.95 | 1.72E-01 | 0.27  | 3.95E-01 | 0.72  | 2.36E-01 |
| CEP164     | 0.95 | 1.72E-01 | 0.70  | 2.43E-01 | -0.79 | 7.86E-01 |
| CPT1B      | 0.95 | 1.72E-01 | 0.26  | 3.97E-01 | 0.66  | 2.54E-01 |
| EIF4H      | 0.95 | 1.72E-01 | -0.01 | 5.05E-01 | 1.45  | 7.37E-02 |
| C6         | 0.95 | 1.72E-01 | 1.57  | 5.87E-02 | -0.68 | 7.51E-01 |
| PNISR      | 0.94 | 1.72E-01 | 0.58  | 2.83E-01 | 0.15  | 4.40E-01 |
| FAM211A    | 0.94 | 1.72E-01 | 1.37  | 8.53E-02 | 0.61  | 2.71E-01 |
| DALRD3     | 0.94 | 1.72E-01 | -0.58 | 7.20E-01 | 1.67  | 4.73E-02 |
| WAC        | 0.94 | 1.73E-01 | 1.51  | 6.59E-02 | -0.37 | 6.46E-01 |
| SND1       | 0.94 | 1.73E-01 | 1.17  | 1.22E-01 | -0.04 | 5.16E-01 |
| SLN        | 0.94 | 1.73E-01 | 1.24  | 1.07E-01 | -0.28 | 6.10E-01 |
| HECTD1     | 0.94 | 1.73E-01 | 1.05  | 1.47E-01 | 0.05  | 4.81E-01 |
| IRF3       | 0.94 | 1.73E-01 | -0.22 | 5.85E-01 | 0.94  | 1.74E-01 |
| SEMA5B     | 0.94 | 1.73E-01 | 1.56  | 5.90E-02 | 0.02  | 4.90E-01 |
| RNF133     | 0.94 | 1.73E-01 | 0.59  | 2.78E-01 | -0.07 | 5.29E-01 |
| PSMB5      | 0.94 | 1.73E-01 | -0.04 | 5.16E-01 | 0.48  | 3.14E-01 |
| SNRK       | 0.94 | 1.73E-01 | 0.06  | 4.78E-01 | 1.44  | 7.54E-02 |
| SCAF1      | 0.94 | 1.73E-01 | -0.41 | 6.58E-01 | 0.81  | 2.08E-01 |
| MGME1      | 0.94 | 1.73E-01 | 0.77  | 2.22E-01 | -0.18 | 5.71E-01 |
| ACYP2      | 0.94 | 1.73E-01 | 0.55  | 2.92E-01 | -0.16 | 5.64E-01 |
| FBXL3      | 0.94 | 1.73E-01 | 1.63  | 5.12E-02 | -0.85 | 8.03E-01 |
| TBC1D15    | 0.94 | 1.73E-01 | 1.15  | 1.25E-01 | 0.52  | 3.02E-01 |

|         |      |          |       |          |       |          |
|---------|------|----------|-------|----------|-------|----------|
| CRYL1   | 0.94 | 1.73E-01 | 1.33  | 9.16E-02 | -1.15 | 8.75E-01 |
| PTPLA   | 0.94 | 1.73E-01 | 1.14  | 1.27E-01 | -1.27 | 8.98E-01 |
| COQ6    | 0.94 | 1.73E-01 | -0.17 | 5.67E-01 | 0.55  | 2.90E-01 |
| INHBA   | 0.94 | 1.73E-01 | 0.45  | 3.26E-01 | 0.45  | 3.27E-01 |
| USP37   | 0.94 | 1.73E-01 | -0.67 | 7.49E-01 | 2.01  | 2.24E-02 |
| COL8A1  | 0.94 | 1.73E-01 | 0.63  | 2.64E-01 | -0.59 | 7.21E-01 |
| CD300LF | 0.94 | 1.73E-01 | 1.39  | 8.29E-02 | -1.40 | 9.19E-01 |
| PKDREJ  | 0.94 | 1.73E-01 | -1.41 | 9.20E-01 | 1.52  | 6.41E-02 |
| ZNF142  | 0.94 | 1.73E-01 | -1.01 | 8.43E-01 | 1.81  | 3.54E-02 |
| PPP1R1B | 0.94 | 1.74E-01 | 0.76  | 2.23E-01 | 0.02  | 4.94E-01 |
| FNDC7   | 0.94 | 1.74E-01 | 0.10  | 4.60E-01 | 0.06  | 4.75E-01 |
| LUC7L3  | 0.94 | 1.74E-01 | 0.74  | 2.30E-01 | -0.51 | 6.94E-01 |
| DDX19A  | 0.94 | 1.74E-01 | 1.84  | 3.27E-02 | -0.40 | 6.54E-01 |
| MAPK10  | 0.94 | 1.74E-01 | 2.37  | 8.86E-03 | -0.82 | 7.94E-01 |
| ZNF771  | 0.94 | 1.74E-01 | 0.37  | 3.57E-01 | -0.01 | 5.04E-01 |
| ANKRD1  | 0.94 | 1.74E-01 | 0.53  | 2.99E-01 | 0.82  | 2.06E-01 |
| SBF1    | 0.94 | 1.74E-01 | -1.05 | 8.53E-01 | 0.80  | 2.12E-01 |
| CKMT1A  | 0.94 | 1.74E-01 | 1.45  | 7.37E-02 | -0.26 | 6.02E-01 |
| FSD2    | 0.94 | 1.74E-01 | 0.76  | 2.25E-01 | 0.91  | 1.82E-01 |
| SYTL2   | 0.94 | 1.74E-01 | 0.95  | 1.71E-01 | -0.74 | 7.70E-01 |
| CD28    | 0.94 | 1.74E-01 | 1.47  | 7.14E-02 | -1.51 | 9.34E-01 |
| VPS13C  | 0.94 | 1.74E-01 | -0.49 | 6.89E-01 | 0.49  | 3.12E-01 |
| GNMT    | 0.94 | 1.74E-01 | 0.36  | 3.58E-01 | 0.23  | 4.07E-01 |
| NKX3-2  | 0.94 | 1.74E-01 | 0.92  | 1.78E-01 | -0.67 | 7.48E-01 |
| TGFB1   | 0.94 | 1.74E-01 | 1.02  | 1.55E-01 | -0.21 | 5.83E-01 |
| UROS    | 0.94 | 1.74E-01 | 1.15  | 1.26E-01 | -0.63 | 7.37E-01 |
| MYO3A   | 0.94 | 1.74E-01 | 2.22  | 1.33E-02 | -1.33 | 9.09E-01 |
| CDK3    | 0.94 | 1.74E-01 | 0.42  | 3.38E-01 | 0.93  | 1.76E-01 |
| PPIL2   | 0.94 | 1.74E-01 | -1.49 | 9.32E-01 | 2.69  | 3.54E-03 |
| SDR9C7  | 0.94 | 1.74E-01 | -0.12 | 5.47E-01 | 0.79  | 2.14E-01 |
| AFM     | 0.94 | 1.74E-01 | 0.46  | 3.24E-01 | -0.16 | 5.65E-01 |

|               |      |          |       |          |       |          |
|---------------|------|----------|-------|----------|-------|----------|
| FAM124B       | 0.94 | 1.75E-01 | 0.79  | 2.15E-01 | 0.60  | 2.74E-01 |
| TRPC4         | 0.94 | 1.75E-01 | 0.52  | 3.02E-01 | -1.11 | 8.66E-01 |
| MED4          | 0.94 | 1.75E-01 | -1.33 | 9.08E-01 | 2.13  | 1.65E-02 |
| PSMB3         | 0.94 | 1.75E-01 | 2.01  | 2.20E-02 | -1.61 | 9.46E-01 |
| KCNS3         | 0.94 | 1.75E-01 | 0.47  | 3.20E-01 | -0.34 | 6.34E-01 |
| PPP2CA        | 0.94 | 1.75E-01 | 0.95  | 1.72E-01 | 1.84  | 3.27E-02 |
| CCDC166       | 0.93 | 1.75E-01 | 1.54  | 6.14E-02 | -0.62 | 7.32E-01 |
| STON1-GTF2A1L | 0.93 | 1.75E-01 | 1.11  | 1.34E-01 | -1.81 | 9.65E-01 |
| H2AFJ         | 0.93 | 1.75E-01 | 0.86  | 1.96E-01 | 0.54  | 2.94E-01 |
| LIPT1         | 0.93 | 1.75E-01 | -0.42 | 6.63E-01 | 0.97  | 1.66E-01 |
| MAPKBP1       | 0.93 | 1.75E-01 | 0.69  | 2.44E-01 | -0.49 | 6.86E-01 |
| MYRFL         | 0.93 | 1.75E-01 | 1.63  | 5.13E-02 | -1.46 | 9.27E-01 |
| PAG1          | 0.93 | 1.75E-01 | -1.33 | 9.08E-01 | 2.56  | 5.17E-03 |
| MAPRE2        | 0.93 | 1.75E-01 | -1.44 | 9.24E-01 | 2.38  | 8.67E-03 |
| RSPO2         | 0.93 | 1.75E-01 | 0.62  | 2.68E-01 | -0.89 | 8.13E-01 |
| UBN1          | 0.93 | 1.75E-01 | 0.71  | 2.40E-01 | 0.83  | 2.05E-01 |
| C2orf66       | 0.93 | 1.75E-01 | 1.18  | 1.20E-01 | -0.04 | 5.17E-01 |
| DOK5          | 0.93 | 1.75E-01 | -0.85 | 8.01E-01 | 1.22  | 1.12E-01 |
| IFNAR1        | 0.93 | 1.76E-01 | 1.04  | 1.49E-01 | -1.28 | 8.99E-01 |
| MPZL2         | 0.93 | 1.76E-01 | 1.45  | 7.38E-02 | 0.45  | 3.25E-01 |
| APCDD1        | 0.93 | 1.76E-01 | 0.86  | 1.95E-01 | -0.52 | 6.99E-01 |
| WFDC10A       | 0.93 | 1.76E-01 | 0.76  | 2.24E-01 | -0.54 | 7.07E-01 |
| CCDC94        | 0.93 | 1.76E-01 | -0.80 | 7.89E-01 | 1.63  | 5.17E-02 |
| SIAH1         | 0.93 | 1.76E-01 | -0.38 | 6.47E-01 | 0.74  | 2.30E-01 |
| NIN           | 0.93 | 1.76E-01 | 0.36  | 3.59E-01 | 0.46  | 3.21E-01 |
| C11orf74      | 0.93 | 1.76E-01 | -0.92 | 8.21E-01 | 1.58  | 5.66E-02 |
| DVL2          | 0.93 | 1.76E-01 | -0.32 | 6.27E-01 | 1.55  | 6.04E-02 |
| HIVEP3        | 0.93 | 1.76E-01 | 0.59  | 2.78E-01 | -0.05 | 5.21E-01 |
| CASP7         | 0.93 | 1.76E-01 | -0.20 | 5.81E-01 | 0.24  | 4.05E-01 |
| SPDYE3        | 0.93 | 1.76E-01 | 0.53  | 2.97E-01 | -0.25 | 5.97E-01 |
| YIF1B         | 0.93 | 1.76E-01 | 0.39  | 3.49E-01 | -0.29 | 6.16E-01 |

|          |      |          |       |          |       |          |
|----------|------|----------|-------|----------|-------|----------|
| MAGI2    | 0.93 | 1.76E-01 | 0.22  | 4.11E-01 | -0.07 | 5.28E-01 |
| SOX17    | 0.93 | 1.76E-01 | -0.40 | 6.56E-01 | 0.95  | 1.70E-01 |
| CTNND2   | 0.93 | 1.76E-01 | 0.00  | 5.00E-01 | 1.57  | 5.86E-02 |
| TPRX2P   | 0.93 | 1.76E-01 | 2.72  | 3.30E-03 | -0.35 | 6.38E-01 |
| PELI3    | 0.93 | 1.76E-01 | 1.52  | 6.42E-02 | -0.71 | 7.60E-01 |
| FOXN2    | 0.93 | 1.76E-01 | 1.70  | 4.45E-02 | -1.08 | 8.61E-01 |
| PTPN13   | 0.93 | 1.77E-01 | 1.90  | 2.90E-02 | -0.73 | 7.68E-01 |
| PYGL     | 0.93 | 1.77E-01 | 1.20  | 1.15E-01 | -0.14 | 5.56E-01 |
| OR5K4    | 0.93 | 1.77E-01 | 1.07  | 1.41E-01 | -0.37 | 6.44E-01 |
| ZNF318   | 0.93 | 1.77E-01 | -0.28 | 6.10E-01 | 1.37  | 8.60E-02 |
| SAMD4A   | 0.93 | 1.77E-01 | 0.77  | 2.22E-01 | 0.33  | 3.70E-01 |
| MORN4    | 0.93 | 1.77E-01 | 0.60  | 2.74E-01 | 0.37  | 3.56E-01 |
| GRIN2A   | 0.93 | 1.77E-01 | 0.37  | 3.55E-01 | 0.89  | 1.88E-01 |
| MAD2L2   | 0.93 | 1.77E-01 | -0.09 | 5.36E-01 | 0.02  | 4.90E-01 |
| CXCL10   | 0.93 | 1.77E-01 | 0.25  | 4.01E-01 | 0.56  | 2.86E-01 |
| MAMDC2   | 0.93 | 1.77E-01 | -0.51 | 6.93E-01 | 0.67  | 2.50E-01 |
| NRG1     | 0.93 | 1.77E-01 | 1.12  | 1.31E-01 | 0.82  | 2.07E-01 |
| MCRS1    | 0.93 | 1.77E-01 | 0.74  | 2.29E-01 | -0.35 | 6.37E-01 |
| NME6     | 0.93 | 1.77E-01 | 1.55  | 6.03E-02 | -1.32 | 9.07E-01 |
| SLC25A29 | 0.93 | 1.77E-01 | 1.01  | 1.56E-01 | -0.62 | 7.34E-01 |
| FLYWCH1  | 0.93 | 1.77E-01 | 0.27  | 3.95E-01 | 0.54  | 2.94E-01 |
| SLA      | 0.93 | 1.77E-01 | -1.31 | 9.05E-01 | 1.75  | 4.03E-02 |
| TDRD3    | 0.93 | 1.77E-01 | -0.04 | 5.14E-01 | 0.56  | 2.88E-01 |
| QRSL1    | 0.92 | 1.78E-01 | 0.99  | 1.61E-01 | -0.11 | 5.45E-01 |
| ZNF345   | 0.92 | 1.78E-01 | -0.31 | 6.20E-01 | 0.58  | 2.82E-01 |
| IRF9     | 0.92 | 1.78E-01 | -0.52 | 6.99E-01 | 0.42  | 3.38E-01 |
| MMAA     | 0.92 | 1.78E-01 | 1.22  | 1.11E-01 | -0.49 | 6.87E-01 |
| PRR23B   | 0.92 | 1.78E-01 | 1.04  | 1.49E-01 | -0.35 | 6.38E-01 |
| DBNDD2   | 0.92 | 1.78E-01 | 0.63  | 2.64E-01 | 0.17  | 4.31E-01 |
| MPZL3    | 0.92 | 1.78E-01 | 1.17  | 1.20E-01 | 2.22  | 1.32E-02 |
| ARRDC5   | 0.92 | 1.78E-01 | 0.64  | 2.62E-01 | 1.01  | 1.57E-01 |

|          |      |          |       |          |       |          |
|----------|------|----------|-------|----------|-------|----------|
| RGS8     | 0.92 | 1.78E-01 | -0.11 | 5.43E-01 | -0.12 | 5.48E-01 |
| ZKSCAN5  | 0.92 | 1.78E-01 | -0.29 | 6.14E-01 | 0.59  | 2.76E-01 |
| DBN1     | 0.92 | 1.78E-01 | 1.70  | 4.49E-02 | 0.14  | 4.43E-01 |
| EPHA5    | 0.92 | 1.78E-01 | 0.27  | 3.92E-01 | 0.56  | 2.86E-01 |
| FKBP10   | 0.92 | 1.78E-01 | 0.88  | 1.90E-01 | -0.25 | 5.97E-01 |
| CD1E     | 0.92 | 1.78E-01 | -0.32 | 6.25E-01 | 1.23  | 1.10E-01 |
| 43344    | 0.92 | 1.78E-01 | 0.53  | 2.99E-01 | 0.22  | 4.14E-01 |
| SUB1     | 0.92 | 1.78E-01 | -0.24 | 5.95E-01 | 0.11  | 4.54E-01 |
| PHACTR1  | 0.92 | 1.78E-01 | 1.30  | 9.75E-02 | 0.16  | 4.37E-01 |
| KRTAP3-3 | 0.92 | 1.78E-01 | 1.40  | 8.02E-02 | 1.01  | 1.55E-01 |
| MYCT1    | 0.92 | 1.78E-01 | 2.61  | 4.52E-03 | -0.39 | 6.51E-01 |
| C10orf2  | 0.92 | 1.79E-01 | -0.84 | 8.00E-01 | 1.38  | 8.33E-02 |
| DPH1     | 0.92 | 1.79E-01 | 0.64  | 2.61E-01 | 0.40  | 3.44E-01 |
| LPHN3    | 0.92 | 1.79E-01 | -1.82 | 9.65E-01 | 1.52  | 6.37E-02 |
| TOX2     | 0.92 | 1.79E-01 | 1.47  | 7.08E-02 | 0.40  | 3.44E-01 |
| MX1      | 0.92 | 1.79E-01 | 1.45  | 7.37E-02 | 0.14  | 4.45E-01 |
| ZNF835   | 0.92 | 1.79E-01 | -1.45 | 9.27E-01 | 1.26  | 1.03E-01 |
| KRTCAP3  | 0.92 | 1.79E-01 | 1.49  | 6.80E-02 | 1.94  | 2.63E-02 |
| GAS7     | 0.92 | 1.79E-01 | 1.05  | 1.46E-01 | 0.45  | 3.27E-01 |
| RHOQ     | 0.92 | 1.79E-01 | -0.74 | 7.71E-01 | 1.03  | 1.51E-01 |
| DAPK1    | 0.92 | 1.79E-01 | 0.50  | 3.09E-01 | 0.48  | 3.15E-01 |
| TMEM239  | 0.92 | 1.79E-01 | 0.44  | 3.30E-01 | 0.30  | 3.81E-01 |
| DACT2    | 0.92 | 1.79E-01 | 1.62  | 5.23E-02 | -1.26 | 8.96E-01 |
| IQCF5    | 0.92 | 1.79E-01 | 1.59  | 5.54E-02 | -1.13 | 8.70E-01 |
| RFX5     | 0.92 | 1.79E-01 | 0.20  | 4.19E-01 | 0.14  | 4.44E-01 |
| SDHAF1   | 0.92 | 1.79E-01 | -0.17 | 5.69E-01 | 0.71  | 2.38E-01 |
| SVOPL    | 0.92 | 1.79E-01 | -0.02 | 5.09E-01 | 0.73  | 2.33E-01 |
| GSG1     | 0.92 | 1.79E-01 | 0.15  | 4.41E-01 | 0.54  | 2.94E-01 |
| PRDM2    | 0.92 | 1.79E-01 | -0.52 | 6.99E-01 | 0.95  | 1.72E-01 |
| SPARCL1  | 0.92 | 1.80E-01 | 1.28  | 1.01E-01 | -0.46 | 6.77E-01 |
| SAMD12   | 0.92 | 1.80E-01 | 0.73  | 2.31E-01 | 0.22  | 4.15E-01 |

|          |      |          |       |          |       |          |
|----------|------|----------|-------|----------|-------|----------|
| TMEM126B | 0.92 | 1.80E-01 | 0.43  | 3.33E-01 | 0.81  | 2.09E-01 |
| SHISA6   | 0.92 | 1.80E-01 | 1.16  | 1.24E-01 | -0.68 | 7.51E-01 |
| RBM24    | 0.92 | 1.80E-01 | 1.33  | 9.25E-02 | -1.05 | 8.53E-01 |
| HSD3B2   | 0.92 | 1.80E-01 | -1.22 | 8.89E-01 | 2.14  | 1.61E-02 |
| ZDHHC16  | 0.92 | 1.80E-01 | 0.76  | 2.25E-01 | 1.21  | 1.12E-01 |
| SERPINH1 | 0.92 | 1.80E-01 | 1.35  | 8.84E-02 | 0.12  | 4.50E-01 |
| B3GNT5   | 0.92 | 1.80E-01 | 0.82  | 2.05E-01 | 1.36  | 8.65E-02 |
| PAM      | 0.92 | 1.80E-01 | 0.73  | 2.34E-01 | -0.58 | 7.20E-01 |
| ERP44    | 0.92 | 1.80E-01 | -0.01 | 5.03E-01 | 1.63  | 5.14E-02 |
| IGF2BP2  | 0.91 | 1.80E-01 | 1.27  | 1.03E-01 | 1.06  | 1.44E-01 |
| LZTS3    | 0.91 | 1.80E-01 | 0.11  | 4.56E-01 | -0.41 | 6.59E-01 |
| STC2     | 0.91 | 1.80E-01 | 0.15  | 4.39E-01 | 0.51  | 3.06E-01 |
| HADH     | 0.91 | 1.80E-01 | 1.20  | 1.16E-01 | -0.31 | 6.23E-01 |
| MED12L   | 0.91 | 1.80E-01 | 1.32  | 9.31E-02 | -1.10 | 8.64E-01 |
| MALRD1   | 0.91 | 1.80E-01 | 1.47  | 7.04E-02 | 0.35  | 3.63E-01 |
| TNFSF10  | 0.91 | 1.80E-01 | -0.06 | 5.22E-01 | 0.63  | 2.64E-01 |
| TBX4     | 0.91 | 1.81E-01 | 0.73  | 2.32E-01 | -0.56 | 7.13E-01 |
| SRGAP1   | 0.91 | 1.81E-01 | 0.22  | 4.12E-01 | 0.84  | 2.01E-01 |
| RNF182   | 0.91 | 1.81E-01 | 0.99  | 1.60E-01 | -0.13 | 5.54E-01 |
| BCDIN3D  | 0.91 | 1.81E-01 | 0.27  | 3.94E-01 | 0.26  | 3.97E-01 |
| FDXACB1  | 0.91 | 1.81E-01 | 1.57  | 5.82E-02 | -0.22 | 5.89E-01 |
| CGNL1    | 0.91 | 1.81E-01 | 0.41  | 3.42E-01 | -0.94 | 8.28E-01 |
| SMAP2    | 0.91 | 1.81E-01 | 0.71  | 2.38E-01 | 0.07  | 4.71E-01 |
| HIST1H4C | 0.91 | 1.81E-01 | -0.24 | 5.96E-01 | 0.49  | 3.12E-01 |
| CHRNA10  | 0.91 | 1.81E-01 | -0.35 | 6.37E-01 | 1.29  | 9.85E-02 |
| ZNF468   | 0.91 | 1.81E-01 | 1.05  | 1.48E-01 | -0.44 | 6.71E-01 |
| SPNS2    | 0.91 | 1.81E-01 | 0.13  | 4.47E-01 | 0.43  | 3.34E-01 |
| FASN     | 0.91 | 1.81E-01 | -0.01 | 5.05E-01 | 0.37  | 3.54E-01 |
| SLC12A1  | 0.91 | 1.82E-01 | 3.07  | 1.06E-03 | 1.23  | 1.10E-01 |
| GOLGA4   | 0.91 | 1.82E-01 | 0.78  | 2.17E-01 | -0.24 | 5.95E-01 |
| KYNU     | 0.91 | 1.82E-01 | 0.22  | 4.12E-01 | 1.39  | 8.24E-02 |

|           |      |          |       |          |       |          |
|-----------|------|----------|-------|----------|-------|----------|
| NPFF      | 0.91 | 1.82E-01 | 0.46  | 3.24E-01 | 0.15  | 4.40E-01 |
| RAVER1    | 0.91 | 1.82E-01 | -0.60 | 7.25E-01 | 1.11  | 1.33E-01 |
| OR6V1     | 0.91 | 1.82E-01 | 1.03  | 1.52E-01 | -0.93 | 8.24E-01 |
| TMEM115   | 0.91 | 1.82E-01 | 1.49  | 6.86E-02 | 0.16  | 4.36E-01 |
| C8orf34   | 0.91 | 1.82E-01 | 1.05  | 1.47E-01 | 0.26  | 3.97E-01 |
| KLF1      | 0.91 | 1.82E-01 | 0.02  | 4.92E-01 | 0.86  | 1.94E-01 |
| ASB3      | 0.91 | 1.82E-01 | 1.28  | 1.01E-01 | -0.99 | 8.38E-01 |
| OR8D4     | 0.91 | 1.82E-01 | 0.76  | 2.23E-01 | 0.40  | 3.44E-01 |
| PTK7      | 0.91 | 1.82E-01 | 0.61  | 2.72E-01 | 0.41  | 3.39E-01 |
| UFSP1     | 0.91 | 1.82E-01 | 0.43  | 3.35E-01 | 0.23  | 4.10E-01 |
| RPS13     | 0.91 | 1.82E-01 | 0.22  | 4.14E-01 | 1.07  | 1.43E-01 |
| ARHGAP27  | 0.91 | 1.82E-01 | 1.13  | 1.29E-01 | -0.80 | 7.88E-01 |
| HIST1H2BE | 0.91 | 1.82E-01 | 0.13  | 4.46E-01 | 0.56  | 2.87E-01 |
| 43344     | 0.91 | 1.82E-01 | 0.42  | 3.39E-01 | 0.59  | 2.78E-01 |
| AK9       | 0.91 | 1.82E-01 | -0.38 | 6.47E-01 | 1.06  | 1.45E-01 |
| LPCAT1    | 0.91 | 1.82E-01 | -0.60 | 7.27E-01 | 0.41  | 3.41E-01 |
| RTN1      | 0.91 | 1.82E-01 | 0.21  | 4.16E-01 | 3.25  | 5.81E-04 |
| PRAME     | 0.91 | 1.83E-01 | 0.05  | 4.81E-01 | 0.41  | 3.40E-01 |
| MOV10L1   | 0.91 | 1.83E-01 | 0.71  | 2.39E-01 | -0.40 | 6.56E-01 |
| ABCB5     | 0.91 | 1.83E-01 | 0.05  | 4.79E-01 | 0.24  | 4.06E-01 |
| TMOD4     | 0.91 | 1.83E-01 | -0.46 | 6.77E-01 | 0.62  | 2.68E-01 |
| NPVF      | 0.91 | 1.83E-01 | 1.27  | 1.02E-01 | 1.73  | 4.19E-02 |
| MESDC1    | 0.91 | 1.83E-01 | -0.11 | 5.44E-01 | 0.76  | 2.25E-01 |
| SLC35A3   | 0.90 | 1.83E-01 | 0.91  | 1.81E-01 | -0.96 | 8.32E-01 |
| MEX3A     | 0.90 | 1.83E-01 | 1.23  | 1.09E-01 | -0.83 | 7.97E-01 |
| VAPB      | 0.90 | 1.83E-01 | 0.04  | 4.83E-01 | 1.60  | 5.50E-02 |
| AKR1D1    | 0.90 | 1.83E-01 | -1.34 | 9.10E-01 | 2.01  | 2.22E-02 |
| GLDC      | 0.90 | 1.83E-01 | -0.98 | 8.37E-01 | 1.34  | 9.02E-02 |
| EPS8L2    | 0.90 | 1.83E-01 | 0.76  | 2.22E-01 | -0.49 | 6.90E-01 |
| MAPK1IP1L | 0.90 | 1.83E-01 | 0.21  | 4.15E-01 | 0.84  | 2.00E-01 |
| ZMYM6     | 0.90 | 1.83E-01 | -1.12 | 8.68E-01 | 1.25  | 1.07E-01 |

|            |      |          |       |          |       |          |
|------------|------|----------|-------|----------|-------|----------|
| SPATA5     | 0.90 | 1.83E-01 | -0.46 | 6.78E-01 | 0.82  | 2.06E-01 |
| ZSCAN29    | 0.90 | 1.83E-01 | 0.77  | 2.20E-01 | 1.52  | 6.47E-02 |
| FIBP       | 0.90 | 1.83E-01 | 1.60  | 5.49E-02 | -1.12 | 8.68E-01 |
| PROX2      | 0.90 | 1.83E-01 | 0.75  | 2.26E-01 | 0.36  | 3.58E-01 |
| FAM71E2    | 0.90 | 1.83E-01 | 1.46  | 7.22E-02 | 0.20  | 4.20E-01 |
| CA6        | 0.90 | 1.83E-01 | -0.05 | 5.19E-01 | -0.24 | 5.97E-01 |
| LONP2      | 0.90 | 1.84E-01 | -0.63 | 7.37E-01 | 1.09  | 1.39E-01 |
| TM2D2      | 0.90 | 1.84E-01 | 1.84  | 3.28E-02 | -1.33 | 9.09E-01 |
| SPINK8     | 0.90 | 1.84E-01 | 1.64  | 5.09E-02 | -0.92 | 8.22E-01 |
| STMN4      | 0.90 | 1.84E-01 | 1.95  | 2.59E-02 | 1.53  | 6.29E-02 |
| MYO16      | 0.90 | 1.84E-01 | -0.01 | 5.03E-01 | 1.12  | 1.32E-01 |
| C11orf57   | 0.90 | 1.84E-01 | -0.59 | 7.22E-01 | 1.13  | 1.29E-01 |
| RPS8       | 0.90 | 1.84E-01 | 2.03  | 2.10E-02 | -0.66 | 7.44E-01 |
| SFXN1      | 0.90 | 1.84E-01 | 1.02  | 1.55E-01 | -0.44 | 6.68E-01 |
| LRRC40     | 0.90 | 1.84E-01 | 0.59  | 2.78E-01 | -0.09 | 5.35E-01 |
| ERVMER34-1 | 0.90 | 1.84E-01 | 0.00  | 5.00E-01 | 0.74  | 2.31E-01 |
| CCDC110    | 0.90 | 1.84E-01 | 0.54  | 2.95E-01 | -0.33 | 6.28E-01 |
| OR6C3      | 0.90 | 1.84E-01 | -0.07 | 5.29E-01 | 1.11  | 1.34E-01 |
| MYL6B      | 0.90 | 1.84E-01 | -0.46 | 6.77E-01 | 0.75  | 2.26E-01 |
| ZDHHC14    | 0.90 | 1.84E-01 | 0.86  | 1.95E-01 | -0.22 | 5.87E-01 |
| LEPROT     | 0.90 | 1.84E-01 | 0.29  | 3.85E-01 | -0.10 | 5.40E-01 |
| HYPK       | 0.90 | 1.84E-01 | 1.37  | 8.58E-02 | -0.33 | 6.31E-01 |
| CCL23      | 0.90 | 1.84E-01 | 2.08  | 1.86E-02 | -0.16 | 5.64E-01 |
| AKR1B15    | 0.90 | 1.84E-01 | 1.62  | 5.31E-02 | 0.49  | 3.11E-01 |
| SMIM18     | 0.90 | 1.84E-01 | 0.37  | 3.56E-01 | 0.22  | 4.12E-01 |
| PIK3C2A    | 0.90 | 1.84E-01 | 0.31  | 3.78E-01 | 2.08  | 1.87E-02 |
| COPB1      | 0.90 | 1.84E-01 | 1.00  | 1.58E-01 | -0.17 | 5.66E-01 |
| GDAP1L1    | 0.90 | 1.84E-01 | 0.80  | 2.12E-01 | 0.43  | 3.33E-01 |
| HDHD3      | 0.90 | 1.84E-01 | 0.98  | 1.64E-01 | -0.87 | 8.08E-01 |
| GABARAPL3  | 0.90 | 1.84E-01 | 0.35  | 3.64E-01 | 0.61  | 2.69E-01 |
| ZNF706     | 0.90 | 1.85E-01 | -0.88 | 8.09E-01 | 1.18  | 1.18E-01 |



|          |      |          |       |          |       |          |
|----------|------|----------|-------|----------|-------|----------|
| OR5D16   | 0.90 | 1.85E-01 | 1.29  | 9.87E-02 | -0.53 | 7.01E-01 |
| MYADM    | 0.90 | 1.85E-01 | 0.17  | 4.31E-01 | 0.76  | 2.23E-01 |
| PFKP     | 0.90 | 1.85E-01 | 0.21  | 4.17E-01 | 1.28  | 1.01E-01 |
| DSC1     | 0.90 | 1.85E-01 | 0.47  | 3.18E-01 | -0.44 | 6.69E-01 |
| AXL      | 0.90 | 1.85E-01 | -0.06 | 5.24E-01 | 1.61  | 5.35E-02 |
| L3MBTL1  | 0.90 | 1.85E-01 | 0.43  | 3.35E-01 | 0.60  | 2.74E-01 |
| SULT1E1  | 0.90 | 1.85E-01 | 0.06  | 4.77E-01 | -0.63 | 7.35E-01 |
| PLAU     | 0.90 | 1.85E-01 | 1.56  | 5.95E-02 | -1.63 | 9.49E-01 |
| KIAA1731 | 0.90 | 1.85E-01 | 0.64  | 2.60E-01 | -0.17 | 5.68E-01 |
| SEMA4A   | 0.90 | 1.85E-01 | 0.02  | 4.92E-01 | 0.61  | 2.72E-01 |
| ZNF366   | 0.90 | 1.85E-01 | 0.83  | 2.02E-01 | -1.39 | 9.17E-01 |
| MATK     | 0.90 | 1.85E-01 | 0.59  | 2.78E-01 | 1.70  | 4.48E-02 |
| FAM115A  | 0.90 | 1.85E-01 | -0.47 | 6.81E-01 | 1.61  | 5.37E-02 |
| ZC3H18   | 0.90 | 1.85E-01 | 0.65  | 2.57E-01 | -0.28 | 6.10E-01 |
| ZNF560   | 0.89 | 1.85E-01 | -0.20 | 5.81E-01 | 1.04  | 1.48E-01 |
| SLC12A9  | 0.89 | 1.86E-01 | 1.03  | 1.52E-01 | -0.24 | 5.96E-01 |
| IQGAP1   | 0.89 | 1.86E-01 | -0.27 | 6.08E-01 | 0.86  | 1.95E-01 |
| PIN1     | 0.89 | 1.86E-01 | -0.57 | 7.15E-01 | 1.25  | 1.05E-01 |
| CDKN2D   | 0.89 | 1.86E-01 | 0.06  | 4.76E-01 | 0.26  | 3.99E-01 |
| FAIM     | 0.89 | 1.86E-01 | 0.27  | 3.93E-01 | 0.02  | 4.92E-01 |
| ZNF273   | 0.89 | 1.86E-01 | 0.46  | 3.24E-01 | 0.37  | 3.56E-01 |
| MPST     | 0.89 | 1.86E-01 | -0.02 | 5.08E-01 | 0.45  | 3.28E-01 |
| C5orf64  | 0.89 | 1.86E-01 | 1.15  | 1.26E-01 | 0.43  | 3.33E-01 |
| ACTL6A   | 0.89 | 1.86E-01 | 0.06  | 4.77E-01 | 1.01  | 1.57E-01 |
| ITSN1    | 0.89 | 1.86E-01 | 1.38  | 8.36E-02 | 1.10  | 1.35E-01 |
| BMP1     | 0.89 | 1.86E-01 | 0.05  | 4.78E-01 | 0.36  | 3.60E-01 |
| PLCD4    | 0.89 | 1.86E-01 | -0.92 | 8.20E-01 | 1.65  | 4.90E-02 |
| THAP6    | 0.89 | 1.86E-01 | 0.28  | 3.89E-01 | 1.43  | 7.60E-02 |
| ZMYM6NB  | 0.89 | 1.86E-01 | -1.36 | 9.13E-01 | 1.20  | 1.14E-01 |
| TSPYL1   | 0.89 | 1.86E-01 | 1.69  | 4.58E-02 | -0.90 | 8.17E-01 |
| MGP      | 0.89 | 1.86E-01 | -0.11 | 5.44E-01 | 0.68  | 2.49E-01 |

|           |      |          |       |          |       |          |
|-----------|------|----------|-------|----------|-------|----------|
| ABCF3     | 0.89 | 1.86E-01 | -0.15 | 5.61E-01 | -0.06 | 5.24E-01 |
| EPHX1     | 0.89 | 1.86E-01 | -0.87 | 8.08E-01 | 0.56  | 2.87E-01 |
| OSBP      | 0.89 | 1.86E-01 | 1.06  | 1.44E-01 | -0.39 | 6.51E-01 |
| OR2H2     | 0.89 | 1.86E-01 | 0.32  | 3.75E-01 | -0.05 | 5.19E-01 |
| LCA5L     | 0.89 | 1.87E-01 | 1.03  | 1.52E-01 | 0.45  | 3.26E-01 |
| HIST1H2AG | 0.89 | 1.87E-01 | 1.19  | 1.16E-01 | 0.18  | 4.28E-01 |
| BACE1     | 0.89 | 1.87E-01 | 0.80  | 2.11E-01 | -0.11 | 5.43E-01 |
| UNC13C    | 0.89 | 1.87E-01 | 1.64  | 5.03E-02 | 0.54  | 2.93E-01 |
| MMS19     | 0.89 | 1.87E-01 | 0.65  | 2.58E-01 | 1.67  | 4.79E-02 |
| UBE2E2    | 0.89 | 1.87E-01 | 0.81  | 2.10E-01 | -0.65 | 7.43E-01 |
| IQCJ      | 0.89 | 1.87E-01 | 1.04  | 1.48E-01 | 0.48  | 3.16E-01 |
| DPY30     | 0.89 | 1.87E-01 | -0.44 | 6.72E-01 | 0.86  | 1.95E-01 |
| C15orf38  | 0.89 | 1.87E-01 | 0.95  | 1.71E-01 | -1.00 | 8.41E-01 |
| BMP2      | 0.89 | 1.87E-01 | 1.65  | 4.99E-02 | 1.29  | 9.90E-02 |
| DTWD1     | 0.89 | 1.87E-01 | -0.76 | 7.77E-01 | 1.15  | 1.24E-01 |
| CCDC39    | 0.89 | 1.87E-01 | -0.12 | 5.49E-01 | 3.25  | 5.77E-04 |
| NEK3      | 0.89 | 1.87E-01 | 1.22  | 1.12E-01 | 2.41  | 7.94E-03 |
| MRPL4     | 0.89 | 1.87E-01 | 1.13  | 1.29E-01 | -0.13 | 5.53E-01 |
| PER1      | 0.89 | 1.87E-01 | 1.41  | 7.90E-02 | 0.70  | 2.41E-01 |
| COPE      | 0.89 | 1.87E-01 | 1.51  | 6.50E-02 | -0.59 | 7.22E-01 |
| APH1B     | 0.89 | 1.87E-01 | -0.04 | 5.16E-01 | 0.28  | 3.88E-01 |
| MEMO1     | 0.89 | 1.87E-01 | -0.47 | 6.80E-01 | 0.89  | 1.86E-01 |
| KLHL7     | 0.89 | 1.88E-01 | 0.39  | 3.47E-01 | 0.59  | 2.76E-01 |
| TMEM237   | 0.89 | 1.88E-01 | -0.69 | 7.54E-01 | 0.86  | 1.96E-01 |
| EPHX4     | 0.89 | 1.88E-01 | 0.70  | 2.43E-01 | -0.84 | 7.99E-01 |
| ANO7      | 0.89 | 1.88E-01 | 0.86  | 1.95E-01 | -1.04 | 8.51E-01 |
| GPR149    | 0.89 | 1.88E-01 | 1.22  | 1.10E-01 | -1.10 | 8.64E-01 |
| C9orf57   | 0.89 | 1.88E-01 | 0.08  | 4.69E-01 | 1.03  | 1.51E-01 |
| SCRIB     | 0.88 | 1.88E-01 | 0.56  | 2.89E-01 | -0.19 | 5.75E-01 |
| CRABP1    | 0.88 | 1.88E-01 | 0.34  | 3.66E-01 | 0.09  | 4.63E-01 |
| ATAD1     | 0.88 | 1.88E-01 | 0.36  | 3.59E-01 | 0.44  | 3.31E-01 |

|           |      |          |       |          |       |          |
|-----------|------|----------|-------|----------|-------|----------|
| FAH       | 0.88 | 1.88E-01 | 0.86  | 1.94E-01 | -0.71 | 7.62E-01 |
| UBE2E3    | 0.88 | 1.88E-01 | 0.86  | 1.96E-01 | -0.37 | 6.43E-01 |
| RPP40     | 0.88 | 1.88E-01 | 0.36  | 3.58E-01 | -0.20 | 5.80E-01 |
| UAP1      | 0.88 | 1.88E-01 | 0.46  | 3.21E-01 | 2.19  | 1.43E-02 |
| USP6NL    | 0.88 | 1.88E-01 | 0.87  | 1.93E-01 | -1.17 | 8.80E-01 |
| SGCE      | 0.88 | 1.88E-01 | 2.14  | 1.62E-02 | -0.53 | 7.00E-01 |
| ANTXRL    | 0.88 | 1.88E-01 | 0.24  | 4.06E-01 | -0.39 | 6.50E-01 |
| EXOC6     | 0.88 | 1.89E-01 | 0.83  | 2.02E-01 | 0.50  | 3.08E-01 |
| BGLAP     | 0.88 | 1.89E-01 | 0.29  | 3.87E-01 | 0.38  | 3.51E-01 |
| CATSPER1  | 0.88 | 1.89E-01 | 0.99  | 1.60E-01 | -0.67 | 7.49E-01 |
| ROGDI     | 0.88 | 1.89E-01 | 1.51  | 6.51E-02 | -0.31 | 6.22E-01 |
| GEMIN4    | 0.88 | 1.89E-01 | 0.13  | 4.49E-01 | 1.60  | 5.47E-02 |
| DOCK3     | 0.88 | 1.89E-01 | 0.82  | 2.07E-01 | -0.55 | 7.10E-01 |
| NME9      | 0.88 | 1.89E-01 | -0.45 | 6.75E-01 | 0.93  | 1.75E-01 |
| SUCLG2    | 0.88 | 1.89E-01 | 0.66  | 2.54E-01 | 0.02  | 4.93E-01 |
| IL31      | 0.88 | 1.89E-01 | 0.71  | 2.39E-01 | -0.43 | 6.66E-01 |
| GTF3C5    | 0.88 | 1.89E-01 | -0.53 | 7.03E-01 | 1.64  | 5.10E-02 |
| PSMD3     | 0.88 | 1.89E-01 | 0.69  | 2.44E-01 | -0.29 | 6.15E-01 |
| DHRS4-AS1 | 0.88 | 1.90E-01 | -1.06 | 8.55E-01 | 1.21  | 1.13E-01 |
| ZNF768    | 0.88 | 1.90E-01 | 1.64  | 5.05E-02 | -1.21 | 8.87E-01 |
| AQP4      | 0.88 | 1.90E-01 | 1.46  | 7.19E-02 | 0.27  | 3.93E-01 |
| B4GALT7   | 0.88 | 1.90E-01 | 1.43  | 7.57E-02 | -0.14 | 5.57E-01 |
| PAPOLA    | 0.88 | 1.90E-01 | -1.08 | 8.60E-01 | 1.98  | 2.40E-02 |
| ARHGEF38  | 0.88 | 1.90E-01 | 0.58  | 2.80E-01 | 0.90  | 1.84E-01 |
| CELF5     | 0.88 | 1.90E-01 | 0.33  | 3.70E-01 | -0.13 | 5.52E-01 |
| GRAMD2    | 0.88 | 1.90E-01 | 0.04  | 4.84E-01 | 0.65  | 2.56E-01 |
| CCDC173   | 0.88 | 1.90E-01 | -0.36 | 6.39E-01 | 2.26  | 1.19E-02 |
| SLC22A7   | 0.88 | 1.90E-01 | 0.47  | 3.18E-01 | 0.85  | 1.99E-01 |
| DEPDC7    | 0.88 | 1.90E-01 | -0.60 | 7.25E-01 | 0.88  | 1.89E-01 |
| ZNF385C   | 0.88 | 1.90E-01 | 0.75  | 2.26E-01 | -0.23 | 5.91E-01 |
| HOXD13    | 0.88 | 1.90E-01 | -0.95 | 8.30E-01 | 2.13  | 1.67E-02 |

|           |      |          |       |          |       |          |
|-----------|------|----------|-------|----------|-------|----------|
| PSMA1     | 0.88 | 1.90E-01 | 1.01  | 1.57E-01 | -0.13 | 5.51E-01 |
| ADAMTS17  | 0.88 | 1.90E-01 | 0.49  | 3.13E-01 | 0.49  | 3.12E-01 |
| MIER1     | 0.88 | 1.90E-01 | 0.59  | 2.77E-01 | 0.67  | 2.52E-01 |
| PIGP      | 0.88 | 1.90E-01 | 0.06  | 4.75E-01 | 0.35  | 3.64E-01 |
| VSNL1     | 0.88 | 1.90E-01 | -1.24 | 8.93E-01 | 2.70  | 3.51E-03 |
| GPR144    | 0.88 | 1.90E-01 | 0.90  | 1.85E-01 | -0.37 | 6.45E-01 |
| ARHGAP28  | 0.88 | 1.90E-01 | 1.80  | 3.60E-02 | -1.11 | 8.66E-01 |
| SNPH      | 0.88 | 1.90E-01 | 1.17  | 1.21E-01 | 0.77  | 2.21E-01 |
| ZNF605    | 0.88 | 1.90E-01 | 1.55  | 6.01E-02 | 0.57  | 2.85E-01 |
| FOXL1     | 0.88 | 1.90E-01 | -0.75 | 7.74E-01 | 1.27  | 1.03E-01 |
| HIST1H2AB | 0.88 | 1.90E-01 | 0.41  | 3.40E-01 | -0.15 | 5.60E-01 |
| GBF1      | 0.88 | 1.90E-01 | -0.42 | 6.62E-01 | 0.76  | 2.25E-01 |
| SERGEF    | 0.88 | 1.90E-01 | 2.38  | 8.70E-03 | -1.20 | 8.86E-01 |
| OTOL1     | 0.87 | 1.91E-01 | -0.01 | 5.03E-01 | 1.42  | 7.77E-02 |
| DPEP2     | 0.87 | 1.91E-01 | -1.10 | 8.65E-01 | 2.09  | 1.85E-02 |
| GBX1      | 0.87 | 1.91E-01 | -0.34 | 6.31E-01 | 0.53  | 2.97E-01 |
| HCN2      | 0.87 | 1.91E-01 | 2.11  | 1.74E-02 | -0.73 | 7.66E-01 |
| CUTC      | 0.87 | 1.91E-01 | 0.52  | 3.02E-01 | -0.78 | 7.82E-01 |
| CNTNAP4   | 0.87 | 1.91E-01 | 2.27  | 1.17E-02 | -0.01 | 5.03E-01 |
| TNFRSF13B | 0.87 | 1.91E-01 | -1.77 | 9.61E-01 | 1.73  | 4.22E-02 |
| ATXN7L1   | 0.87 | 1.91E-01 | 0.73  | 2.32E-01 | -0.35 | 6.38E-01 |
| C1orf145  | 0.87 | 1.92E-01 | 1.30  | 9.71E-02 | -0.62 | 7.33E-01 |
| AMT       | 0.87 | 1.92E-01 | -0.87 | 8.07E-01 | 2.50  | 6.21E-03 |
| HAUS5     | 0.87 | 1.92E-01 | 1.38  | 8.41E-02 | -0.02 | 5.07E-01 |
| KIAA1549L | 0.87 | 1.92E-01 | 0.54  | 2.96E-01 | 0.33  | 3.69E-01 |
| BSX       | 0.87 | 1.92E-01 | -0.36 | 6.39E-01 | 0.94  | 1.74E-01 |
| LEP       | 0.87 | 1.92E-01 | -0.87 | 8.07E-01 | 1.02  | 1.54E-01 |
| TNIP1     | 0.87 | 1.92E-01 | 0.36  | 3.59E-01 | 0.92  | 1.80E-01 |
| DSC2      | 0.87 | 1.92E-01 | 0.86  | 1.94E-01 | -0.09 | 5.37E-01 |
| UPK3B     | 0.87 | 1.92E-01 | -0.10 | 5.38E-01 | 2.79  | 2.67E-03 |
| TGM6      | 0.87 | 1.92E-01 | -0.34 | 6.32E-01 | 0.83  | 2.04E-01 |

|         |      |          |       |          |       |          |
|---------|------|----------|-------|----------|-------|----------|
| KDM2B   | 0.87 | 1.92E-01 | 0.14  | 4.43E-01 | 0.51  | 3.04E-01 |
| FOXQ1   | 0.87 | 1.92E-01 | -0.39 | 6.53E-01 | 0.64  | 2.63E-01 |
| SYNGR3  | 0.87 | 1.92E-01 | 1.23  | 1.09E-01 | -1.10 | 8.65E-01 |
| NEUROD2 | 0.87 | 1.92E-01 | 0.59  | 2.79E-01 | 0.47  | 3.21E-01 |
| TBC1D31 | 0.87 | 1.92E-01 | 1.10  | 1.36E-01 | 0.05  | 4.81E-01 |
| ALKBH2  | 0.87 | 1.93E-01 | -0.29 | 6.13E-01 | 0.47  | 3.18E-01 |
| ZNF460  | 0.87 | 1.93E-01 | -0.22 | 5.86E-01 | 0.70  | 2.41E-01 |
| DSCC1   | 0.87 | 1.93E-01 | -0.07 | 5.28E-01 | 0.24  | 4.06E-01 |
| LGALS9  | 0.87 | 1.93E-01 | -0.45 | 6.73E-01 | 0.92  | 1.78E-01 |
| ZNF709  | 0.87 | 1.93E-01 | -0.03 | 5.14E-01 | -0.19 | 5.75E-01 |
| OR1A2   | 0.87 | 1.93E-01 | 0.24  | 4.05E-01 | 0.10  | 4.59E-01 |
| POLI    | 0.87 | 1.93E-01 | -0.62 | 7.34E-01 | 1.47  | 7.06E-02 |
| COL4A3  | 0.87 | 1.93E-01 | -1.18 | 8.82E-01 | 1.33  | 9.26E-02 |
| TMEM66  | 0.87 | 1.93E-01 | 0.68  | 2.49E-01 | -0.25 | 5.97E-01 |
| CKMT2   | 0.87 | 1.93E-01 | 0.67  | 2.50E-01 | 0.74  | 2.29E-01 |
| IL12B   | 0.87 | 1.93E-01 | 0.92  | 1.78E-01 | -0.29 | 6.16E-01 |
| COX16   | 0.87 | 1.93E-01 | 1.40  | 8.10E-02 | -0.01 | 5.02E-01 |
| COPRS   | 0.87 | 1.93E-01 | 2.54  | 5.58E-03 | -0.57 | 7.17E-01 |
| TTLL13  | 0.87 | 1.93E-01 | -0.03 | 5.12E-01 | 0.26  | 3.96E-01 |
| COQ10B  | 0.87 | 1.93E-01 | 1.17  | 1.22E-01 | 0.38  | 3.52E-01 |
| PTH2R   | 0.87 | 1.93E-01 | 0.20  | 4.22E-01 | 1.44  | 7.45E-02 |
| DUT     | 0.87 | 1.93E-01 | 2.32  | 1.02E-02 | 0.31  | 3.77E-01 |
| VANGL2  | 0.86 | 1.94E-01 | 0.59  | 2.78E-01 | -0.26 | 6.04E-01 |
| PSG6    | 0.86 | 1.94E-01 | 1.42  | 7.76E-02 | -1.18 | 8.82E-01 |
| STRA6   | 0.86 | 1.94E-01 | -0.16 | 5.65E-01 | 0.45  | 3.28E-01 |
| EED     | 0.86 | 1.94E-01 | 1.64  | 5.04E-02 | -0.18 | 5.73E-01 |
| CLCA2   | 0.86 | 1.94E-01 | 1.26  | 1.03E-01 | -1.09 | 8.61E-01 |
| CCL17   | 0.86 | 1.94E-01 | 0.76  | 2.23E-01 | -0.52 | 6.99E-01 |
| MYEF2   | 0.86 | 1.94E-01 | 0.58  | 2.80E-01 | 0.13  | 4.48E-01 |
| MCM5    | 0.86 | 1.94E-01 | 0.16  | 4.38E-01 | 0.25  | 4.02E-01 |
| TRIM43  | 0.86 | 1.94E-01 | 0.79  | 2.15E-01 | -0.06 | 5.26E-01 |

|               |      |          |       |          |       |          |
|---------------|------|----------|-------|----------|-------|----------|
| BIN3          | 0.86 | 1.94E-01 | -1.27 | 8.99E-01 | 1.31  | 9.52E-02 |
| ACN9          | 0.86 | 1.94E-01 | 1.38  | 8.42E-02 | 0.41  | 3.39E-01 |
| RUNX2         | 0.86 | 1.94E-01 | 0.58  | 2.81E-01 | -1.19 | 8.83E-01 |
| ZNF514        | 0.86 | 1.94E-01 | 0.62  | 2.66E-01 | 0.20  | 4.20E-01 |
| IHH           | 0.86 | 1.94E-01 | -0.05 | 5.22E-01 | 0.95  | 1.71E-01 |
| STX2          | 0.86 | 1.94E-01 | -0.15 | 5.59E-01 | 0.94  | 1.73E-01 |
| SLC45A2       | 0.86 | 1.94E-01 | 0.31  | 3.77E-01 | 0.37  | 3.57E-01 |
| BBOX1         | 0.86 | 1.95E-01 | 0.30  | 3.81E-01 | 0.09  | 4.66E-01 |
| MDH1          | 0.86 | 1.95E-01 | 1.10  | 1.36E-01 | -0.81 | 7.92E-01 |
| RNF17         | 0.86 | 1.95E-01 | 0.47  | 3.19E-01 | -0.36 | 6.40E-01 |
| H2AFX         | 0.86 | 1.95E-01 | 0.90  | 1.85E-01 | 0.01  | 4.96E-01 |
| WIPI1         | 0.86 | 1.95E-01 | 1.07  | 1.42E-01 | 0.43  | 3.35E-01 |
| RP11-597K23.2 | 0.86 | 1.95E-01 | -0.20 | 5.79E-01 | 0.66  | 2.54E-01 |
| KCNJ2         | 0.86 | 1.95E-01 | -0.49 | 6.89E-01 | 0.53  | 2.97E-01 |
| BNIP2         | 0.86 | 1.95E-01 | 1.16  | 1.24E-01 | -1.16 | 8.77E-01 |
| C15orf43      | 0.86 | 1.95E-01 | 1.89  | 2.96E-02 | -0.16 | 5.63E-01 |
| VAMP2         | 0.86 | 1.95E-01 | -0.20 | 5.80E-01 | 0.72  | 2.37E-01 |
| GRIK4         | 0.86 | 1.95E-01 | 0.12  | 4.51E-01 | 0.46  | 3.24E-01 |
| PRED57        | 0.86 | 1.95E-01 | -0.18 | 5.73E-01 | 0.40  | 3.46E-01 |
| SLC25A32      | 0.86 | 1.96E-01 | 0.93  | 1.77E-01 | -0.09 | 5.36E-01 |
| HIST1H1A      | 0.86 | 1.96E-01 | 0.46  | 3.22E-01 | -0.44 | 6.71E-01 |
| MLH1          | 0.86 | 1.96E-01 | 0.05  | 4.78E-01 | 0.52  | 3.02E-01 |
| TP73          | 0.86 | 1.96E-01 | -1.08 | 8.59E-01 | 1.63  | 5.16E-02 |
| PDDC1         | 0.86 | 1.96E-01 | -0.34 | 6.35E-01 | 0.52  | 3.03E-01 |
| METAP1        | 0.86 | 1.96E-01 | 0.55  | 2.91E-01 | -0.24 | 5.94E-01 |
| AHSP          | 0.86 | 1.96E-01 | -0.32 | 6.26E-01 | 0.27  | 3.94E-01 |
| SMC5          | 0.86 | 1.96E-01 | -0.47 | 6.82E-01 | 0.87  | 1.92E-01 |
| OR10J5        | 0.86 | 1.96E-01 | -1.34 | 9.09E-01 | 1.17  | 1.22E-01 |
| FLJ45079      | 0.86 | 1.96E-01 | 0.05  | 4.79E-01 | 0.37  | 3.57E-01 |
| TBCCD1        | 0.86 | 1.96E-01 | -1.17 | 8.79E-01 | 0.81  | 2.09E-01 |
| ATP2C2        | 0.86 | 1.96E-01 | 2.06  | 1.97E-02 | 0.19  | 4.23E-01 |

|             |      |          |       |          |       |          |
|-------------|------|----------|-------|----------|-------|----------|
| FPGT-TNNI3K | 0.86 | 1.96E-01 | 0.24  | 4.05E-01 | 1.07  | 1.42E-01 |
| TNNI3K      | 0.86 | 1.96E-01 | 0.24  | 4.05E-01 | 1.07  | 1.42E-01 |
| FZD9        | 0.85 | 1.96E-01 | -0.63 | 7.36E-01 | 0.74  | 2.29E-01 |
| THOC7       | 0.85 | 1.96E-01 | 1.16  | 1.23E-01 | 1.34  | 8.99E-02 |
| SULF2       | 0.85 | 1.96E-01 | 1.96  | 2.49E-02 | -0.76 | 7.76E-01 |
| TPM2        | 0.85 | 1.96E-01 | 0.95  | 1.72E-01 | -0.64 | 7.37E-01 |
| TRIM47      | 0.85 | 1.96E-01 | 0.46  | 3.24E-01 | 1.13  | 1.29E-01 |
| POLD4       | 0.85 | 1.96E-01 | 2.50  | 6.18E-03 | -0.10 | 5.40E-01 |
| CLPS        | 0.85 | 1.97E-01 | -2.16 | 9.85E-01 | 1.67  | 4.72E-02 |
| P2RY12      | 0.85 | 1.97E-01 | 0.64  | 2.61E-01 | -0.44 | 6.71E-01 |
| ERCC8       | 0.85 | 1.97E-01 | -0.72 | 7.63E-01 | 1.64  | 5.05E-02 |
| KLLN        | 0.85 | 1.97E-01 | 1.14  | 1.27E-01 | -1.96 | 9.75E-01 |
| UNC5CL      | 0.85 | 1.97E-01 | 0.35  | 3.64E-01 | -0.15 | 5.59E-01 |
| JPH1        | 0.85 | 1.97E-01 | 2.39  | 8.47E-03 | -0.78 | 7.81E-01 |
| CD302       | 0.85 | 1.97E-01 | 0.64  | 2.60E-01 | -0.11 | 5.43E-01 |
| TARBP2      | 0.85 | 1.97E-01 | 1.72  | 4.31E-02 | -1.11 | 8.67E-01 |
| NR1I3       | 0.85 | 1.97E-01 | -1.06 | 8.54E-01 | 1.35  | 8.84E-02 |
| LILRB5      | 0.85 | 1.97E-01 | 0.53  | 2.98E-01 | -0.05 | 5.18E-01 |
| JTB         | 0.85 | 1.97E-01 | -0.15 | 5.58E-01 | 1.81  | 3.51E-02 |
| IFT20       | 0.85 | 1.97E-01 | 0.11  | 4.55E-01 | 0.30  | 3.82E-01 |
| GLT8D2      | 0.85 | 1.97E-01 | -0.83 | 7.95E-01 | 0.68  | 2.49E-01 |
| DAG1        | 0.85 | 1.97E-01 | -1.09 | 8.63E-01 | 2.37  | 8.91E-03 |
| VIL1        | 0.85 | 1.98E-01 | -0.49 | 6.89E-01 | 2.15  | 1.56E-02 |
| ZNF37A      | 0.85 | 1.98E-01 | 0.17  | 4.32E-01 | 0.21  | 4.16E-01 |
| ABHD8       | 0.85 | 1.98E-01 | 1.17  | 1.20E-01 | -0.44 | 6.70E-01 |
| EFNA2       | 0.85 | 1.98E-01 | 0.21  | 4.16E-01 | 0.37  | 3.55E-01 |
| RASSF5      | 0.85 | 1.98E-01 | 1.04  | 1.50E-01 | 0.75  | 2.26E-01 |
| HIST1H4E    | 0.85 | 1.98E-01 | 0.05  | 4.79E-01 | 2.47  | 6.84E-03 |
| ATP6V1A     | 0.85 | 1.98E-01 | 1.31  | 9.49E-02 | -0.69 | 7.54E-01 |
| DSCAML1     | 0.85 | 1.98E-01 | -1.67 | 9.53E-01 | 0.53  | 2.97E-01 |
| ZNF619      | 0.85 | 1.98E-01 | 1.54  | 6.16E-02 | -1.00 | 8.41E-01 |

|           |      |          |       |          |       |          |
|-----------|------|----------|-------|----------|-------|----------|
| HSPB8     | 0.85 | 1.98E-01 | 0.81  | 2.09E-01 | -1.59 | 9.44E-01 |
| STT3A     | 0.85 | 1.98E-01 | 0.52  | 3.02E-01 | 0.32  | 3.76E-01 |
| HTR5A     | 0.85 | 1.98E-01 | 1.76  | 3.90E-02 | -1.40 | 9.20E-01 |
| MYF6      | 0.85 | 1.98E-01 | 0.90  | 1.84E-01 | -0.77 | 7.78E-01 |
| HIST1H3D  | 0.85 | 1.98E-01 | 0.00  | 5.01E-01 | 1.69  | 4.55E-02 |
| ACOT12    | 0.85 | 1.98E-01 | 0.49  | 3.12E-01 | 0.54  | 2.95E-01 |
| OR6Y1     | 0.85 | 1.98E-01 | 1.07  | 1.42E-01 | -0.71 | 7.60E-01 |
| KRT71     | 0.85 | 1.99E-01 | -0.36 | 6.39E-01 | 0.76  | 2.24E-01 |
| AP2B1     | 0.85 | 1.99E-01 | -0.66 | 7.46E-01 | 0.77  | 2.20E-01 |
| C19orf26  | 0.85 | 1.99E-01 | 0.28  | 3.89E-01 | 0.07  | 4.72E-01 |
| SOX15     | 0.85 | 1.99E-01 | 1.27  | 1.02E-01 | -0.63 | 7.36E-01 |
| VPREB3    | 0.85 | 1.99E-01 | -0.36 | 6.39E-01 | 2.46  | 7.03E-03 |
| UQCR11    | 0.85 | 1.99E-01 | -0.41 | 6.58E-01 | 1.01  | 1.56E-01 |
| MS4A2     | 0.85 | 1.99E-01 | -0.59 | 7.23E-01 | 0.87  | 1.91E-01 |
| AADAT     | 0.85 | 1.99E-01 | 0.96  | 1.68E-01 | -1.28 | 9.00E-01 |
| JMJD1C    | 0.84 | 1.99E-01 | 0.06  | 4.75E-01 | 1.91  | 2.84E-02 |
| GGTLC1    | 0.84 | 1.99E-01 | 2.32  | 1.02E-02 | 0.38  | 3.51E-01 |
| TMEM14C   | 0.84 | 1.99E-01 | 0.84  | 2.01E-01 | -0.33 | 6.31E-01 |
| PDE6D     | 0.84 | 1.99E-01 | 2.03  | 2.11E-02 | -1.07 | 8.57E-01 |
| POM121L12 | 0.84 | 1.99E-01 | 0.32  | 3.76E-01 | 0.72  | 2.36E-01 |
| GTF2A2    | 0.84 | 1.99E-01 | 1.23  | 1.09E-01 | -1.32 | 9.07E-01 |
| RNF165    | 0.84 | 1.99E-01 | 0.31  | 3.76E-01 | 1.39  | 8.29E-02 |
| KLHDC2    | 0.84 | 1.99E-01 | 0.43  | 3.32E-01 | -0.07 | 5.27E-01 |
| ATG3      | 0.84 | 1.99E-01 | 0.59  | 2.79E-01 | 0.25  | 4.00E-01 |
| TLE3      | 0.84 | 2.00E-01 | 1.36  | 8.72E-02 | -0.99 | 8.38E-01 |
| NEMF      | 0.84 | 2.00E-01 | 0.07  | 4.73E-01 | 0.18  | 4.27E-01 |
| TNFRSF10C | 0.84 | 2.00E-01 | 1.41  | 7.88E-02 | -0.77 | 7.78E-01 |
| DARC      | 0.84 | 2.00E-01 | -2.08 | 9.81E-01 | 2.17  | 1.51E-02 |
| PARP14    | 0.84 | 2.00E-01 | 1.18  | 1.20E-01 | -0.22 | 5.86E-01 |
| PCBD1     | 0.84 | 2.00E-01 | 0.25  | 4.02E-01 | -0.79 | 7.87E-01 |
| CPAMD8    | 0.84 | 2.00E-01 | 0.01  | 4.95E-01 | 0.95  | 1.71E-01 |



|              |      |          |       |          |       |          |
|--------------|------|----------|-------|----------|-------|----------|
| AP1S3        | 0.84 | 2.00E-01 | -0.77 | 7.81E-01 | 1.33  | 9.17E-02 |
| LIME1        | 0.84 | 2.00E-01 | 1.10  | 1.35E-01 | 0.75  | 2.28E-01 |
| HPSE2        | 0.84 | 2.00E-01 | 0.35  | 3.63E-01 | 1.38  | 8.37E-02 |
| CHAT         | 0.84 | 2.00E-01 | 1.47  | 7.02E-02 | -0.92 | 8.20E-01 |
| TRPV4        | 0.84 | 2.00E-01 | 1.65  | 4.91E-02 | -0.78 | 7.83E-01 |
| FAM19A4      | 0.84 | 2.00E-01 | 1.09  | 1.37E-01 | 0.07  | 4.73E-01 |
| PUM2         | 0.84 | 2.00E-01 | 0.14  | 4.44E-01 | 0.32  | 3.74E-01 |
| PEX16        | 0.84 | 2.00E-01 | 0.79  | 2.14E-01 | 2.99  | 1.39E-03 |
| ALG6         | 0.84 | 2.00E-01 | 1.05  | 1.47E-01 | -1.43 | 9.23E-01 |
| NECAB1       | 0.84 | 2.01E-01 | 1.58  | 5.69E-02 | -1.29 | 9.01E-01 |
| CSGALNACT2   | 0.84 | 2.01E-01 | -1.37 | 9.15E-01 | 1.26  | 1.04E-01 |
| ITGA2        | 0.84 | 2.01E-01 | -0.65 | 7.43E-01 | 0.58  | 2.82E-01 |
| EID2         | 0.84 | 2.01E-01 | 1.01  | 1.56E-01 | -1.20 | 8.85E-01 |
| TMED4        | 0.84 | 2.01E-01 | 0.61  | 2.69E-01 | 1.73  | 4.20E-02 |
| VRK2         | 0.84 | 2.01E-01 | -0.68 | 7.51E-01 | 1.99  | 2.35E-02 |
| RP11-986E7.7 | 0.84 | 2.01E-01 | 0.98  | 1.63E-01 | -1.17 | 8.79E-01 |
| ADCY5        | 0.84 | 2.01E-01 | -0.25 | 5.98E-01 | 0.67  | 2.50E-01 |
| NEIL2        | 0.84 | 2.01E-01 | -0.89 | 8.12E-01 | 2.91  | 1.81E-03 |
| IQCF2        | 0.84 | 2.01E-01 | 1.55  | 6.02E-02 | -1.15 | 8.76E-01 |
| SAP30BP      | 0.84 | 2.01E-01 | -0.44 | 6.70E-01 | 1.62  | 5.26E-02 |
| FRMD4B       | 0.84 | 2.01E-01 | 0.55  | 2.91E-01 | 0.02  | 4.93E-01 |
| MAP4K4       | 0.84 | 2.01E-01 | -1.73 | 9.58E-01 | 1.63  | 5.18E-02 |
| C6orf229     | 0.84 | 2.01E-01 | 0.53  | 2.98E-01 | -0.26 | 6.04E-01 |
| TAAR5        | 0.84 | 2.01E-01 | 0.90  | 1.85E-01 | -0.10 | 5.39E-01 |
| RTP1         | 0.84 | 2.01E-01 | 1.91  | 2.79E-02 | 0.54  | 2.93E-01 |
| AARS         | 0.84 | 2.01E-01 | 1.43  | 7.58E-02 | 0.35  | 3.64E-01 |
| TMPRSS13     | 0.84 | 2.01E-01 | -0.60 | 7.25E-01 | 0.72  | 2.35E-01 |
| FAM206A      | 0.84 | 2.01E-01 | 1.88  | 3.03E-02 | -1.34 | 9.10E-01 |
| PPFIA1       | 0.84 | 2.01E-01 | 0.48  | 3.16E-01 | 0.08  | 4.69E-01 |
| PSMD4        | 0.84 | 2.02E-01 | 0.36  | 3.61E-01 | 0.20  | 4.21E-01 |
| ARMC12       | 0.84 | 2.02E-01 | 0.15  | 4.42E-01 | 1.04  | 1.50E-01 |

|          |      |          |       |          |       |          |
|----------|------|----------|-------|----------|-------|----------|
| PDS5A    | 0.84 | 2.02E-01 | 0.95  | 1.72E-01 | 0.97  | 1.65E-01 |
| MRPL36   | 0.84 | 2.02E-01 | 0.09  | 4.64E-01 | 0.19  | 4.23E-01 |
| NPR2     | 0.83 | 2.02E-01 | 0.81  | 2.08E-01 | -0.39 | 6.51E-01 |
| TOMM7    | 0.83 | 2.02E-01 | 0.53  | 3.00E-01 | 0.30  | 3.82E-01 |
| NRAP     | 0.83 | 2.02E-01 | 0.21  | 4.16E-01 | -0.26 | 6.02E-01 |
| CACNA2D2 | 0.83 | 2.02E-01 | 1.03  | 1.51E-01 | -0.18 | 5.71E-01 |
| KCNG4    | 0.83 | 2.02E-01 | 0.85  | 1.97E-01 | 0.09  | 4.65E-01 |
| HEXA     | 0.83 | 2.02E-01 | 0.08  | 4.67E-01 | 0.51  | 3.06E-01 |
| FGF23    | 0.83 | 2.02E-01 | -0.26 | 6.01E-01 | 0.22  | 4.12E-01 |
| CPA5     | 0.83 | 2.02E-01 | -0.55 | 7.10E-01 | 0.98  | 1.63E-01 |
| ZFR2     | 0.83 | 2.02E-01 | 1.62  | 5.28E-02 | -1.28 | 8.99E-01 |
| NR3C2    | 0.83 | 2.02E-01 | 1.67  | 4.74E-02 | -1.41 | 9.20E-01 |
| MTO1     | 0.83 | 2.02E-01 | 1.19  | 1.17E-01 | -0.41 | 6.57E-01 |
| ARF3     | 0.83 | 2.02E-01 | -0.26 | 6.02E-01 | 0.74  | 2.29E-01 |
| DCLRE1A  | 0.83 | 2.02E-01 | 0.10  | 4.62E-01 | 0.58  | 2.82E-01 |
| RGS13    | 0.83 | 2.02E-01 | 0.86  | 1.94E-01 | -0.57 | 7.16E-01 |
| C6orf164 | 0.83 | 2.02E-01 | 0.10  | 4.60E-01 | 0.88  | 1.90E-01 |
| SNX3     | 0.83 | 2.03E-01 | 1.33  | 9.20E-02 | -0.22 | 5.86E-01 |
| ADPGK    | 0.83 | 2.03E-01 | 2.10  | 1.79E-02 | 1.13  | 1.29E-01 |
| ECI2     | 0.83 | 2.03E-01 | 1.12  | 1.31E-01 | 0.12  | 4.53E-01 |
| WDR27    | 0.83 | 2.03E-01 | -0.96 | 8.31E-01 | 1.04  | 1.49E-01 |
| PLA2G4C  | 0.83 | 2.03E-01 | -0.01 | 5.04E-01 | 1.84  | 3.29E-02 |
| GPR31    | 0.83 | 2.03E-01 | 0.48  | 3.16E-01 | 0.31  | 3.79E-01 |
| C1orf51  | 0.83 | 2.03E-01 | 0.42  | 3.38E-01 | 0.60  | 2.75E-01 |
| CST7     | 0.83 | 2.03E-01 | -1.08 | 8.60E-01 | 1.73  | 4.20E-02 |
| CCDC24   | 0.83 | 2.03E-01 | 1.14  | 1.27E-01 | -0.77 | 7.80E-01 |
| ANO8     | 0.83 | 2.03E-01 | 2.05  | 2.00E-02 | 0.43  | 3.34E-01 |
| GABRA1   | 0.83 | 2.03E-01 | 1.17  | 1.21E-01 | -0.88 | 8.12E-01 |
| SNCAIP   | 0.83 | 2.04E-01 | 0.98  | 1.65E-01 | 0.22  | 4.11E-01 |
| ACTC1    | 0.83 | 2.04E-01 | -0.52 | 6.98E-01 | 0.69  | 2.46E-01 |
| ERCC3    | 0.83 | 2.04E-01 | -0.60 | 7.25E-01 | 0.70  | 2.41E-01 |

|           |      |          |       |          |       |          |
|-----------|------|----------|-------|----------|-------|----------|
| PTPRJ     | 0.83 | 2.04E-01 | 0.77  | 2.22E-01 | -0.34 | 6.34E-01 |
| UGT2B4    | 0.83 | 2.04E-01 | -0.24 | 5.96E-01 | 0.63  | 2.64E-01 |
| ANGPTL1   | 0.83 | 2.04E-01 | 1.35  | 8.87E-02 | 0.08  | 4.68E-01 |
| ABI2      | 0.83 | 2.04E-01 | 0.32  | 3.75E-01 | -0.38 | 6.47E-01 |
| SLC25A39  | 0.83 | 2.04E-01 | 0.59  | 2.78E-01 | -0.81 | 7.91E-01 |
| OR2A2     | 0.83 | 2.04E-01 | -0.06 | 5.23E-01 | 0.60  | 2.74E-01 |
| WNT10A    | 0.83 | 2.04E-01 | 2.12  | 1.69E-02 | 0.15  | 4.40E-01 |
| FAM178A   | 0.83 | 2.04E-01 | 0.57  | 2.84E-01 | 0.42  | 3.36E-01 |
| PPP1R37   | 0.83 | 2.04E-01 | -1.04 | 8.51E-01 | 2.19  | 1.42E-02 |
| RADIL     | 0.83 | 2.04E-01 | 1.12  | 1.31E-01 | -1.31 | 9.06E-01 |
| C1orf21   | 0.83 | 2.04E-01 | 0.91  | 1.81E-01 | 0.91  | 1.80E-01 |
| CNPY4     | 0.83 | 2.04E-01 | 0.07  | 4.72E-01 | 0.77  | 2.21E-01 |
| EVI2A     | 0.83 | 2.04E-01 | -0.36 | 6.39E-01 | 1.89  | 2.95E-02 |
| NPBWR2    | 0.83 | 2.04E-01 | 0.65  | 2.58E-01 | 0.36  | 3.59E-01 |
| KIAA1755  | 0.83 | 2.04E-01 | 1.53  | 6.29E-02 | -1.37 | 9.15E-01 |
| PACS1     | 0.83 | 2.05E-01 | 1.19  | 1.18E-01 | -0.90 | 8.17E-01 |
| ZBTB43    | 0.83 | 2.05E-01 | -1.11 | 8.67E-01 | 1.42  | 7.80E-02 |
| SLC35E2B  | 0.83 | 2.05E-01 | 0.84  | 2.00E-01 | -0.27 | 6.07E-01 |
| DHRS7     | 0.82 | 2.05E-01 | 0.00  | 5.02E-01 | 0.56  | 2.86E-01 |
| KCNH7     | 0.82 | 2.05E-01 | 0.89  | 1.87E-01 | 0.62  | 2.67E-01 |
| C10orf120 | 0.82 | 2.05E-01 | 0.54  | 2.96E-01 | -0.11 | 5.42E-01 |
| ZBBX      | 0.82 | 2.05E-01 | 0.86  | 1.94E-01 | -0.84 | 8.00E-01 |
| NHLRC2    | 0.82 | 2.05E-01 | -0.13 | 5.51E-01 | 0.77  | 2.20E-01 |
| CFI       | 0.82 | 2.05E-01 | 1.64  | 5.04E-02 | 0.20  | 4.20E-01 |
| RAG2      | 0.82 | 2.05E-01 | -0.65 | 7.41E-01 | 1.59  | 5.62E-02 |
| PC        | 0.82 | 2.05E-01 | 0.22  | 4.13E-01 | 0.83  | 2.03E-01 |
| COX6B1    | 0.82 | 2.05E-01 | -1.12 | 8.70E-01 | 1.50  | 6.70E-02 |
| TRAF3IP3  | 0.82 | 2.05E-01 | -0.21 | 5.83E-01 | 1.62  | 5.31E-02 |
| CCDC28A   | 0.82 | 2.05E-01 | 0.21  | 4.16E-01 | 0.06  | 4.74E-01 |
| FHDC1     | 0.82 | 2.05E-01 | -0.75 | 7.72E-01 | 0.06  | 4.77E-01 |
| GPR3      | 0.82 | 2.05E-01 | 0.13  | 4.49E-01 | 0.15  | 4.42E-01 |

|                |      |          |       |          |       |          |
|----------------|------|----------|-------|----------|-------|----------|
| AGRP           | 0.82 | 2.05E-01 | -1.77 | 9.62E-01 | 1.64  | 5.03E-02 |
| ZNRF4          | 0.82 | 2.05E-01 | 0.83  | 2.04E-01 | 0.17  | 4.34E-01 |
| PLN            | 0.82 | 2.05E-01 | 0.49  | 3.13E-01 | 0.10  | 4.60E-01 |
| TNS1           | 0.82 | 2.05E-01 | 2.26  | 1.19E-02 | -1.50 | 9.33E-01 |
| SPPL2C         | 0.82 | 2.05E-01 | 1.53  | 6.27E-02 | -1.40 | 9.20E-01 |
| CDYL2          | 0.82 | 2.06E-01 | -0.60 | 7.26E-01 | 0.70  | 2.42E-01 |
| CHCHD6         | 0.82 | 2.06E-01 | 0.84  | 1.99E-01 | -0.04 | 5.17E-01 |
| ZCCHC2         | 0.82 | 2.06E-01 | 0.54  | 2.96E-01 | 0.10  | 4.59E-01 |
| TRMT6          | 0.82 | 2.06E-01 | 0.79  | 2.14E-01 | -0.05 | 5.21E-01 |
| HRK            | 0.82 | 2.06E-01 | 0.86  | 1.95E-01 | -0.88 | 8.10E-01 |
| ZFP82          | 0.82 | 2.06E-01 | 0.90  | 1.85E-01 | 1.77  | 3.82E-02 |
| BCL2L11        | 0.82 | 2.06E-01 | 1.80  | 3.58E-02 | -1.19 | 8.83E-01 |
| GKN2           | 0.82 | 2.06E-01 | -0.18 | 5.70E-01 | 2.45  | 7.08E-03 |
| ATP2C1         | 0.82 | 2.06E-01 | 1.56  | 5.90E-02 | -0.94 | 8.27E-01 |
| ILK            | 0.82 | 2.06E-01 | -0.20 | 5.81E-01 | 0.66  | 2.55E-01 |
| WWTR1          | 0.82 | 2.06E-01 | 1.05  | 1.48E-01 | 1.67  | 4.74E-02 |
| ANKRD7         | 0.82 | 2.06E-01 | 1.36  | 8.72E-02 | -0.63 | 7.36E-01 |
| OR2B11         | 0.82 | 2.06E-01 | 0.72  | 2.37E-01 | -0.68 | 7.52E-01 |
| MEN1           | 0.82 | 2.06E-01 | -0.95 | 8.29E-01 | 1.41  | 7.99E-02 |
| LPPR5          | 0.82 | 2.06E-01 | 1.29  | 9.85E-02 | -1.42 | 9.22E-01 |
| CLEC4G         | 0.82 | 2.06E-01 | 1.94  | 2.59E-02 | -0.08 | 5.30E-01 |
| IFI16          | 0.82 | 2.07E-01 | 0.01  | 4.96E-01 | 0.15  | 4.41E-01 |
| BANF2          | 0.82 | 2.07E-01 | 0.73  | 2.34E-01 | 1.74  | 4.10E-02 |
| ZSWIM8         | 0.82 | 2.07E-01 | 0.43  | 3.32E-01 | -0.14 | 5.54E-01 |
| SELENBP1       | 0.82 | 2.07E-01 | 0.54  | 2.95E-01 | 0.41  | 3.40E-01 |
| RPL17-C18orf32 | 0.82 | 2.07E-01 | 0.48  | 3.14E-01 | 0.65  | 2.58E-01 |
| ZNF35          | 0.82 | 2.07E-01 | -0.31 | 6.21E-01 | 1.04  | 1.49E-01 |
| ZNF30          | 0.82 | 2.07E-01 | -1.14 | 8.73E-01 | 1.15  | 1.24E-01 |
| TMEM184A       | 0.82 | 2.07E-01 | -1.06 | 8.54E-01 | 1.40  | 8.01E-02 |
| TGIF1          | 0.82 | 2.07E-01 | 0.58  | 2.82E-01 | 0.42  | 3.36E-01 |
| OR9G1          | 0.82 | 2.07E-01 | 1.51  | 6.59E-02 | -1.74 | 9.59E-01 |

|          |      |          |       |          |       |          |
|----------|------|----------|-------|----------|-------|----------|
| SRPK1    | 0.82 | 2.07E-01 | -0.06 | 5.23E-01 | 0.44  | 3.31E-01 |
| SETD6    | 0.82 | 2.07E-01 | -0.33 | 6.29E-01 | 1.35  | 8.93E-02 |
| C2orf70  | 0.82 | 2.07E-01 | 0.82  | 2.07E-01 | -0.42 | 6.62E-01 |
| WFIKKN1  | 0.82 | 2.07E-01 | 0.89  | 1.87E-01 | -0.62 | 7.34E-01 |
| FAM160A2 | 0.82 | 2.07E-01 | 1.55  | 6.01E-02 | -1.42 | 9.22E-01 |
| CELA1    | 0.82 | 2.07E-01 | 0.66  | 2.55E-01 | -0.55 | 7.09E-01 |
| TSPYL6   | 0.82 | 2.08E-01 | 1.10  | 1.35E-01 | 0.35  | 3.64E-01 |
| GDF2     | 0.82 | 2.08E-01 | 0.67  | 2.51E-01 | 0.08  | 4.70E-01 |
| LINGO2   | 0.81 | 2.08E-01 | 1.85  | 3.19E-02 | -0.91 | 8.17E-01 |
| SPINK14  | 0.81 | 2.08E-01 | 0.38  | 3.50E-01 | 0.15  | 4.39E-01 |
| MREG     | 0.81 | 2.08E-01 | 0.78  | 2.18E-01 | 1.26  | 1.03E-01 |
| CC2D1B   | 0.81 | 2.08E-01 | 0.42  | 3.36E-01 | 0.20  | 4.19E-01 |
| MSMP     | 0.81 | 2.08E-01 | 0.16  | 4.38E-01 | -0.54 | 7.07E-01 |
| PGLYRP1  | 0.81 | 2.08E-01 | 0.98  | 1.63E-01 | -0.55 | 7.08E-01 |
| UTS2R    | 0.81 | 2.08E-01 | 0.20  | 4.19E-01 | 0.72  | 2.37E-01 |
| USP48    | 0.81 | 2.08E-01 | 0.17  | 4.34E-01 | -0.16 | 5.62E-01 |
| RNF150   | 0.81 | 2.08E-01 | 0.44  | 3.31E-01 | -0.22 | 5.88E-01 |
| SERAC1   | 0.81 | 2.08E-01 | -0.28 | 6.08E-01 | 1.02  | 1.53E-01 |
| FRMPD2   | 0.81 | 2.08E-01 | -0.15 | 5.61E-01 | 1.67  | 4.77E-02 |
| DLG1     | 0.81 | 2.08E-01 | -0.35 | 6.38E-01 | 0.67  | 2.51E-01 |
| SLC38A11 | 0.81 | 2.08E-01 | -0.06 | 5.23E-01 | -0.08 | 5.33E-01 |
| CSNK2A1  | 0.81 | 2.08E-01 | 0.39  | 3.50E-01 | 0.07  | 4.71E-01 |
| CCT7     | 0.81 | 2.08E-01 | 0.18  | 4.28E-01 | 0.43  | 3.33E-01 |
| KHDC3L   | 0.81 | 2.08E-01 | 1.05  | 1.46E-01 | 0.21  | 4.18E-01 |
| SCGN     | 0.81 | 2.08E-01 | 0.31  | 3.76E-01 | -0.55 | 7.08E-01 |
| PPP2R5B  | 0.81 | 2.08E-01 | -1.22 | 8.89E-01 | 1.45  | 7.37E-02 |
| AIM2     | 0.81 | 2.08E-01 | 0.03  | 4.88E-01 | -0.13 | 5.51E-01 |
| EIF2B5   | 0.81 | 2.09E-01 | -0.24 | 5.95E-01 | 0.80  | 2.12E-01 |
| TRPA1    | 0.81 | 2.09E-01 | 1.30  | 9.66E-02 | -0.77 | 7.81E-01 |
| PNMAL1   | 0.81 | 2.09E-01 | -0.79 | 7.85E-01 | 1.31  | 9.54E-02 |
| CAMK2G   | 0.81 | 2.09E-01 | 0.64  | 2.62E-01 | 0.59  | 2.76E-01 |

|              |      |          |       |          |       |          |
|--------------|------|----------|-------|----------|-------|----------|
| CRP          | 0.81 | 2.09E-01 | 1.03  | 1.51E-01 | -0.58 | 7.19E-01 |
| RGP1         | 0.81 | 2.09E-01 | 0.13  | 4.46E-01 | -0.10 | 5.42E-01 |
| ZNF283       | 0.81 | 2.09E-01 | 0.19  | 4.26E-01 | 0.05  | 4.79E-01 |
| CTSF         | 0.81 | 2.09E-01 | 0.91  | 1.80E-01 | -1.03 | 8.49E-01 |
| PIAS4        | 0.81 | 2.09E-01 | -0.69 | 7.56E-01 | 0.74  | 2.30E-01 |
| TYRP1        | 0.81 | 2.09E-01 | 1.19  | 1.17E-01 | -1.01 | 8.43E-01 |
| PTPRZ1       | 0.81 | 2.09E-01 | -0.39 | 6.51E-01 | 1.42  | 7.84E-02 |
| CHCHD2       | 0.81 | 2.09E-01 | 0.81  | 2.09E-01 | 0.55  | 2.90E-01 |
| FCRLA        | 0.81 | 2.09E-01 | 0.99  | 1.60E-01 | -1.60 | 9.45E-01 |
| SCRT1        | 0.81 | 2.09E-01 | 1.65  | 4.97E-02 | -1.19 | 8.83E-01 |
| FLT3         | 0.81 | 2.09E-01 | -0.06 | 5.22E-01 | 0.32  | 3.73E-01 |
| GNPTAB       | 0.81 | 2.09E-01 | 0.52  | 3.02E-01 | 0.54  | 2.96E-01 |
| PTGER2       | 0.81 | 2.09E-01 | 1.44  | 7.49E-02 | -1.28 | 8.99E-01 |
| FCRL5        | 0.81 | 2.09E-01 | 0.84  | 2.00E-01 | -0.17 | 5.67E-01 |
| CLN5         | 0.81 | 2.10E-01 | 1.54  | 6.14E-02 | -0.34 | 6.34E-01 |
| GRXCR2       | 0.81 | 2.10E-01 | 0.59  | 2.79E-01 | -0.20 | 5.78E-01 |
| PLA2R1       | 0.81 | 2.10E-01 | -0.05 | 5.19E-01 | 0.24  | 4.04E-01 |
| CD209        | 0.81 | 2.10E-01 | 1.79  | 3.71E-02 | -0.88 | 8.11E-01 |
| ZNF384       | 0.81 | 2.10E-01 | -0.37 | 6.43E-01 | 0.73  | 2.33E-01 |
| 43162        | 0.81 | 2.10E-01 | 2.87  | 2.03E-03 | 0.58  | 2.80E-01 |
| HEATR4       | 0.81 | 2.10E-01 | 0.99  | 1.61E-01 | 1.62  | 5.22E-02 |
| CD1D         | 0.81 | 2.10E-01 | 1.29  | 9.81E-02 | -0.29 | 6.14E-01 |
| LPCAT3       | 0.81 | 2.10E-01 | -0.85 | 8.02E-01 | 2.08  | 1.89E-02 |
| RP11-404L6.2 | 0.81 | 2.10E-01 | 1.30  | 9.72E-02 | -0.13 | 5.52E-01 |
| PI4KA        | 0.81 | 2.10E-01 | -0.43 | 6.67E-01 | 1.58  | 5.72E-02 |
| TRIM11       | 0.81 | 2.10E-01 | -0.29 | 6.15E-01 | 1.95  | 2.58E-02 |
| LINC01124    | 0.81 | 2.10E-01 | -0.46 | 6.77E-01 | 0.85  | 1.97E-01 |
| EMG1         | 0.81 | 2.10E-01 | -0.87 | 8.07E-01 | 1.96  | 2.50E-02 |
| ARHGAP33     | 0.81 | 2.10E-01 | -0.71 | 7.60E-01 | 1.22  | 1.12E-01 |
| CNIH2        | 0.81 | 2.10E-01 | 1.21  | 1.12E-01 | -0.35 | 6.37E-01 |
| SUZ12        | 0.81 | 2.10E-01 | 1.40  | 8.03E-02 | -0.92 | 8.22E-01 |

|          |      |          |       |          |       |          |
|----------|------|----------|-------|----------|-------|----------|
| RILPL1   | 0.81 | 2.10E-01 | 1.61  | 5.41E-02 | -0.19 | 5.75E-01 |
| C5       | 0.81 | 2.10E-01 | 0.29  | 3.86E-01 | -0.54 | 7.05E-01 |
| ZNF337   | 0.80 | 2.11E-01 | 0.66  | 2.56E-01 | 0.72  | 2.35E-01 |
| SPATA20  | 0.80 | 2.11E-01 | 0.24  | 4.06E-01 | 0.35  | 3.61E-01 |
| OR8B3    | 0.80 | 2.11E-01 | 1.87  | 3.08E-02 | -1.58 | 9.43E-01 |
| CA14     | 0.80 | 2.11E-01 | -0.97 | 8.35E-01 | 1.38  | 8.38E-02 |
| FIGN     | 0.80 | 2.11E-01 | -0.60 | 7.25E-01 | 0.48  | 3.16E-01 |
| MKRN2    | 0.80 | 2.11E-01 | 0.22  | 4.12E-01 | 0.12  | 4.52E-01 |
| NCAPH    | 0.80 | 2.11E-01 | 0.60  | 2.75E-01 | -0.70 | 7.59E-01 |
| RPN2     | 0.80 | 2.11E-01 | 2.30  | 1.07E-02 | -0.64 | 7.40E-01 |
| 43351    | 0.80 | 2.11E-01 | 0.30  | 3.82E-01 | 2.91  | 1.78E-03 |
| UQCRH    | 0.80 | 2.11E-01 | 0.48  | 3.14E-01 | 0.66  | 2.55E-01 |
| CCDC74A  | 0.80 | 2.11E-01 | 0.05  | 4.79E-01 | 0.75  | 2.27E-01 |
| PROS1    | 0.80 | 2.11E-01 | -0.02 | 5.08E-01 | 0.06  | 4.77E-01 |
| CEACAM6  | 0.80 | 2.11E-01 | 0.73  | 2.31E-01 | -1.14 | 8.72E-01 |
| YIF1A    | 0.80 | 2.11E-01 | 0.66  | 2.54E-01 | -0.05 | 5.20E-01 |
| RTCA     | 0.80 | 2.11E-01 | 0.43  | 3.32E-01 | -0.35 | 6.36E-01 |
| AK7      | 0.80 | 2.12E-01 | -0.83 | 7.96E-01 | 1.48  | 6.97E-02 |
| COX6B2   | 0.80 | 2.12E-01 | 0.40  | 3.46E-01 | 0.26  | 3.96E-01 |
| SLC38A10 | 0.80 | 2.12E-01 | -0.71 | 7.62E-01 | 1.70  | 4.47E-02 |
| IGLL1    | 0.80 | 2.12E-01 | 1.07  | 1.41E-01 | -0.65 | 7.42E-01 |
| ARV1     | 0.80 | 2.12E-01 | 0.45  | 3.26E-01 | -0.14 | 5.55E-01 |
| LSM3     | 0.80 | 2.12E-01 | 0.27  | 3.95E-01 | 0.33  | 3.71E-01 |
| MTERFD2  | 0.80 | 2.12E-01 | 0.77  | 2.22E-01 | -0.85 | 8.03E-01 |
| WIZ      | 0.80 | 2.12E-01 | 1.50  | 6.68E-02 | -0.43 | 6.67E-01 |
| ASCL1    | 0.80 | 2.12E-01 | 1.42  | 7.81E-02 | -0.73 | 7.67E-01 |
| SERPINF2 | 0.80 | 2.12E-01 | -0.22 | 5.89E-01 | 0.49  | 3.11E-01 |
| KLF6     | 0.80 | 2.12E-01 | 0.26  | 3.97E-01 | 0.52  | 3.03E-01 |
| HOXA3    | 0.80 | 2.12E-01 | 1.24  | 1.08E-01 | -0.10 | 5.41E-01 |
| SLC25A11 | 0.80 | 2.12E-01 | 0.00  | 5.00E-01 | 0.63  | 2.65E-01 |
| L1TD1    | 0.80 | 2.12E-01 | 1.64  | 5.04E-02 | -1.19 | 8.83E-01 |

|          |      |          |       |          |       |          |
|----------|------|----------|-------|----------|-------|----------|
| TMCO5A   | 0.80 | 2.12E-01 | 0.03  | 4.88E-01 | 0.72  | 2.37E-01 |
| C11orf82 | 0.80 | 2.12E-01 | -0.07 | 5.28E-01 | 2.12  | 1.70E-02 |
| ACPL2    | 0.80 | 2.13E-01 | 1.00  | 1.59E-01 | -0.08 | 5.30E-01 |
| RALGAPB  | 0.80 | 2.13E-01 | 0.07  | 4.71E-01 | 0.95  | 1.70E-01 |
| UGT2B11  | 0.80 | 2.13E-01 | 1.34  | 9.09E-02 | -0.15 | 5.58E-01 |
| ARMC5    | 0.80 | 2.13E-01 | -0.20 | 5.79E-01 | 0.49  | 3.14E-01 |
| SSRP1    | 0.80 | 2.13E-01 | -0.23 | 5.93E-01 | 0.60  | 2.73E-01 |
| MRPL30   | 0.80 | 2.13E-01 | -0.08 | 5.31E-01 | 0.88  | 1.90E-01 |
| RABIF    | 0.80 | 2.13E-01 | -0.91 | 8.19E-01 | 0.91  | 1.81E-01 |
| PABPC3   | 0.80 | 2.13E-01 | 0.68  | 2.47E-01 | -0.16 | 5.64E-01 |
| DCAF8    | 0.80 | 2.13E-01 | 0.47  | 3.18E-01 | -0.03 | 5.10E-01 |
| C10orf12 | 0.80 | 2.13E-01 | 0.04  | 4.84E-01 | 0.22  | 4.14E-01 |
| CYP2R1   | 0.80 | 2.13E-01 | 0.48  | 3.14E-01 | -0.72 | 7.64E-01 |
| ANP32D   | 0.79 | 2.13E-01 | 0.65  | 2.59E-01 | 0.16  | 4.36E-01 |
| TDGF1    | 0.79 | 2.13E-01 | -0.64 | 7.39E-01 | 0.79  | 2.16E-01 |
| KIAA1524 | 0.79 | 2.13E-01 | 0.43  | 3.34E-01 | 0.38  | 3.52E-01 |
| AMOTL2   | 0.79 | 2.13E-01 | -0.02 | 5.09E-01 | 0.05  | 4.80E-01 |
| HYAL2    | 0.79 | 2.14E-01 | 2.13  | 1.65E-02 | -1.08 | 8.59E-01 |
| RSAD2    | 0.79 | 2.14E-01 | 0.63  | 2.63E-01 | 0.49  | 3.13E-01 |
| COLGALT2 | 0.79 | 2.14E-01 | 0.92  | 1.80E-01 | 0.39  | 3.48E-01 |
| RCBTB1   | 0.79 | 2.14E-01 | 0.60  | 2.75E-01 | 1.53  | 6.27E-02 |
| LACE1    | 0.79 | 2.14E-01 | 0.24  | 4.05E-01 | -0.47 | 6.82E-01 |
| GOLT1B   | 0.79 | 2.14E-01 | -0.03 | 5.12E-01 | -0.21 | 5.84E-01 |
| AMDHD2   | 0.79 | 2.14E-01 | 0.93  | 1.77E-01 | 0.20  | 4.20E-01 |
| MBD3     | 0.79 | 2.14E-01 | -0.49 | 6.86E-01 | 1.05  | 1.47E-01 |
| FBN2     | 0.79 | 2.14E-01 | -0.18 | 5.73E-01 | 0.73  | 2.33E-01 |
| C1orf100 | 0.79 | 2.14E-01 | 0.07  | 4.73E-01 | -0.10 | 5.40E-01 |
| ABCF2    | 0.79 | 2.14E-01 | 0.15  | 4.40E-01 | -0.20 | 5.79E-01 |
| PATE2    | 0.79 | 2.14E-01 | 0.66  | 2.56E-01 | -0.82 | 7.93E-01 |
| MCOLN2   | 0.79 | 2.14E-01 | 0.92  | 1.80E-01 | -0.13 | 5.53E-01 |
| CDC123   | 0.79 | 2.14E-01 | 1.69  | 4.58E-02 | -0.05 | 5.19E-01 |



|         |      |          |       |          |       |          |
|---------|------|----------|-------|----------|-------|----------|
| SCG5    | 0.79 | 2.14E-01 | -0.08 | 5.30E-01 | 1.53  | 6.34E-02 |
| KMO     | 0.79 | 2.14E-01 | -0.65 | 7.43E-01 | 1.55  | 6.06E-02 |
| G2E3    | 0.79 | 2.14E-01 | 0.14  | 4.44E-01 | 1.20  | 1.14E-01 |
| PTBP3   | 0.79 | 2.14E-01 | 0.50  | 3.07E-01 | 0.57  | 2.83E-01 |
| FCHO1   | 0.79 | 2.14E-01 | -0.21 | 5.82E-01 | 1.56  | 5.88E-02 |
| OVGP1   | 0.79 | 2.14E-01 | -0.01 | 5.04E-01 | 1.63  | 5.11E-02 |
| ITIH1   | 0.79 | 2.14E-01 | 0.17  | 4.32E-01 | 0.21  | 4.16E-01 |
| HOXD9   | 0.79 | 2.15E-01 | 1.38  | 8.42E-02 | -1.59 | 9.44E-01 |
| TRIM45  | 0.79 | 2.15E-01 | 0.19  | 4.26E-01 | 0.49  | 3.13E-01 |
| XKR3    | 0.79 | 2.15E-01 | 0.27  | 3.94E-01 | 0.22  | 4.14E-01 |
| TBCK    | 0.79 | 2.15E-01 | 0.33  | 3.70E-01 | 0.15  | 4.40E-01 |
| FAM57A  | 0.79 | 2.15E-01 | 0.27  | 3.94E-01 | 1.35  | 8.87E-02 |
| LIM2    | 0.79 | 2.15E-01 | -0.75 | 7.74E-01 | 1.53  | 6.30E-02 |
| C1orf61 | 0.79 | 2.15E-01 | -0.53 | 7.04E-01 | 0.34  | 3.66E-01 |
| ERLIN2  | 0.79 | 2.15E-01 | 0.16  | 4.38E-01 | 0.49  | 3.12E-01 |
| CCDC105 | 0.79 | 2.15E-01 | 0.34  | 3.66E-01 | 0.60  | 2.73E-01 |
| PCDH20  | 0.79 | 2.15E-01 | -1.04 | 8.50E-01 | 1.09  | 1.38E-01 |
| B3GAT3  | 0.79 | 2.15E-01 | -1.00 | 8.42E-01 | 1.55  | 6.11E-02 |
| FAM45A  | 0.79 | 2.15E-01 | -0.65 | 7.44E-01 | 1.01  | 1.57E-01 |
| FASTKD1 | 0.79 | 2.15E-01 | 0.81  | 2.09E-01 | 1.39  | 8.25E-02 |
| CNP     | 0.79 | 2.15E-01 | 0.34  | 3.67E-01 | 0.19  | 4.23E-01 |
| PILRB   | 0.79 | 2.15E-01 | 0.43  | 3.33E-01 | -0.18 | 5.72E-01 |
| AADA4L4 | 0.79 | 2.15E-01 | -0.88 | 8.10E-01 | 2.11  | 1.74E-02 |
| FBLN2   | 0.79 | 2.16E-01 | 1.09  | 1.38E-01 | -1.14 | 8.73E-01 |
| DYNC1I2 | 0.79 | 2.16E-01 | 0.87  | 1.91E-01 | -0.50 | 6.92E-01 |
| TBX1    | 0.79 | 2.16E-01 | 0.66  | 2.54E-01 | -0.77 | 7.80E-01 |
| OR2AE1  | 0.79 | 2.16E-01 | 1.45  | 7.29E-02 | -0.96 | 8.31E-01 |
| STIM1   | 0.79 | 2.16E-01 | -0.10 | 5.41E-01 | 0.20  | 4.21E-01 |
| ZNF789  | 0.79 | 2.16E-01 | -0.76 | 7.77E-01 | 0.57  | 2.84E-01 |
| MALT1   | 0.79 | 2.16E-01 | 1.28  | 9.94E-02 | -1.55 | 9.40E-01 |
| SHF     | 0.79 | 2.16E-01 | -0.07 | 5.28E-01 | 0.84  | 2.00E-01 |

|             |      |          |       |          |       |          |
|-------------|------|----------|-------|----------|-------|----------|
| VAC14       | 0.79 | 2.16E-01 | 0.88  | 1.89E-01 | 0.81  | 2.08E-01 |
| CHRND       | 0.79 | 2.16E-01 | -0.60 | 7.25E-01 | 0.73  | 2.32E-01 |
| HADHA       | 0.78 | 2.16E-01 | 2.31  | 1.05E-02 | 0.41  | 3.41E-01 |
| MRPL24      | 0.78 | 2.16E-01 | 1.25  | 1.05E-01 | 0.75  | 2.25E-01 |
| ABCB4       | 0.78 | 2.16E-01 | 1.67  | 4.71E-02 | -1.18 | 8.81E-01 |
| GNAO1       | 0.78 | 2.16E-01 | 0.55  | 2.89E-01 | -0.82 | 7.93E-01 |
| WVOX        | 0.78 | 2.17E-01 | 2.65  | 3.98E-03 | -0.50 | 6.92E-01 |
| COQ7        | 0.78 | 2.17E-01 | -0.04 | 5.16E-01 | 0.08  | 4.66E-01 |
| AC005481.5  | 0.78 | 2.17E-01 | 0.42  | 3.36E-01 | 0.28  | 3.90E-01 |
| ZNF225      | 0.78 | 2.17E-01 | -0.39 | 6.52E-01 | 0.73  | 2.32E-01 |
| TROAP       | 0.78 | 2.17E-01 | 2.27  | 1.16E-02 | -0.55 | 7.09E-01 |
| C10orf55    | 0.78 | 2.17E-01 | 1.55  | 6.05E-02 | -1.52 | 9.36E-01 |
| AUH         | 0.78 | 2.17E-01 | -0.19 | 5.75E-01 | -0.05 | 5.18E-01 |
| CFD         | 0.78 | 2.17E-01 | -1.25 | 8.95E-01 | 1.10  | 1.35E-01 |
| SPOCK2      | 0.78 | 2.17E-01 | -0.66 | 7.45E-01 | 1.18  | 1.19E-01 |
| PLD1        | 0.78 | 2.17E-01 | 0.85  | 1.98E-01 | 1.76  | 3.89E-02 |
| KCNA1       | 0.78 | 2.17E-01 | 1.53  | 6.25E-02 | -1.30 | 9.03E-01 |
| DIRC3       | 0.78 | 2.17E-01 | -0.04 | 5.18E-01 | 0.57  | 2.83E-01 |
| LCP1        | 0.78 | 2.17E-01 | 0.81  | 2.10E-01 | 0.85  | 1.97E-01 |
| STK11       | 0.78 | 2.18E-01 | -0.07 | 5.29E-01 | 0.00  | 5.00E-01 |
| RP11-41O4.1 | 0.78 | 2.18E-01 | -0.49 | 6.87E-01 | 0.81  | 2.08E-01 |
| OR2D3       | 0.78 | 2.18E-01 | 0.51  | 3.04E-01 | -0.11 | 5.43E-01 |
| GPR4        | 0.78 | 2.18E-01 | 0.51  | 3.04E-01 | 0.38  | 3.52E-01 |
| MMRN1       | 0.78 | 2.18E-01 | -0.71 | 7.60E-01 | 1.40  | 8.01E-02 |
| CSTA        | 0.78 | 2.18E-01 | 1.55  | 6.10E-02 | -1.12 | 8.68E-01 |
| SPRYD7      | 0.78 | 2.18E-01 | -1.51 | 9.35E-01 | 1.93  | 2.67E-02 |
| ZNF726      | 0.78 | 2.18E-01 | 0.95  | 1.71E-01 | -0.63 | 7.37E-01 |
| BLZF1       | 0.78 | 2.18E-01 | 0.72  | 2.35E-01 | 1.02  | 1.53E-01 |
| MLLT10      | 0.78 | 2.18E-01 | 0.32  | 3.75E-01 | -0.79 | 7.85E-01 |
| PITX2       | 0.78 | 2.18E-01 | 1.02  | 1.54E-01 | -1.33 | 9.08E-01 |
| EXT1        | 0.78 | 2.18E-01 | 0.11  | 4.56E-01 | 0.09  | 4.66E-01 |

|                |      |          |       |          |       |          |
|----------------|------|----------|-------|----------|-------|----------|
| ZNF880         | 0.78 | 2.18E-01 | 0.05  | 4.78E-01 | 1.50  | 6.63E-02 |
| ARHGEF7        | 0.78 | 2.18E-01 | 1.27  | 1.03E-01 | 0.35  | 3.63E-01 |
| PRIM2          | 0.78 | 2.18E-01 | 0.07  | 4.71E-01 | 2.24  | 1.24E-02 |
| KCTD10         | 0.78 | 2.18E-01 | 0.81  | 2.08E-01 | -0.88 | 8.11E-01 |
| MAX            | 0.78 | 2.18E-01 | 1.41  | 8.00E-02 | -1.31 | 9.05E-01 |
| RFC2           | 0.78 | 2.18E-01 | -0.38 | 6.49E-01 | 1.59  | 5.60E-02 |
| RP11-574K11.31 | 0.78 | 2.18E-01 | 0.28  | 3.89E-01 | -0.14 | 5.54E-01 |
| SALL1          | 0.78 | 2.18E-01 | -0.55 | 7.10E-01 | 0.59  | 2.76E-01 |
| WDR63          | 0.78 | 2.18E-01 | 0.00  | 4.99E-01 | 0.01  | 4.98E-01 |
| RP11-399J13.3  | 0.78 | 2.18E-01 | 1.30  | 9.67E-02 | -0.21 | 5.82E-01 |
| NANOS2         | 0.78 | 2.18E-01 | 2.43  | 7.58E-03 | -0.20 | 5.79E-01 |
| PTX4           | 0.78 | 2.18E-01 | -0.90 | 8.16E-01 | 1.16  | 1.23E-01 |
| THPO           | 0.78 | 2.18E-01 | 0.99  | 1.60E-01 | -0.47 | 6.82E-01 |
| CLVS1          | 0.78 | 2.19E-01 | 2.65  | 3.97E-03 | -0.03 | 5.11E-01 |
| ACOXL          | 0.78 | 2.19E-01 | 0.15  | 4.40E-01 | -0.45 | 6.75E-01 |
| NUP133         | 0.78 | 2.19E-01 | -0.84 | 8.01E-01 | 1.48  | 6.94E-02 |
| FKBP6          | 0.78 | 2.19E-01 | 0.08  | 4.67E-01 | 1.20  | 1.14E-01 |
| TRIM25         | 0.78 | 2.19E-01 | -0.21 | 5.83E-01 | 0.32  | 3.76E-01 |
| CCRN4L         | 0.78 | 2.19E-01 | 0.37  | 3.54E-01 | 0.01  | 4.98E-01 |
| IGFBP5         | 0.78 | 2.19E-01 | 1.16  | 1.22E-01 | -1.01 | 8.43E-01 |
| KHDRBS3        | 0.78 | 2.19E-01 | 1.48  | 6.98E-02 | -0.79 | 7.86E-01 |
| ZNF554         | 0.78 | 2.19E-01 | 0.42  | 3.38E-01 | -0.24 | 5.94E-01 |
| SNAP29         | 0.78 | 2.19E-01 | -0.55 | 7.08E-01 | 1.79  | 3.67E-02 |
| MRPL17         | 0.78 | 2.19E-01 | 0.50  | 3.07E-01 | -0.02 | 5.09E-01 |
| CASP3          | 0.78 | 2.19E-01 | -0.73 | 7.68E-01 | 1.27  | 1.03E-01 |
| ATP6V1B2       | 0.78 | 2.19E-01 | 0.49  | 3.12E-01 | 0.13  | 4.48E-01 |
| OXLD1          | 0.77 | 2.19E-01 | 1.25  | 1.05E-01 | -0.92 | 8.22E-01 |
| C1orf50        | 0.77 | 2.19E-01 | 1.40  | 8.01E-02 | -0.13 | 5.52E-01 |
| ERVV-2         | 0.77 | 2.19E-01 | -0.53 | 7.02E-01 | 0.69  | 2.46E-01 |
| SLC25A35       | 0.77 | 2.20E-01 | -0.24 | 5.94E-01 | 1.09  | 1.37E-01 |
| HIPK2          | 0.77 | 2.20E-01 | 2.01  | 2.24E-02 | -1.03 | 8.48E-01 |

|          |      |          |       |          |       |          |
|----------|------|----------|-------|----------|-------|----------|
| ASTL     | 0.77 | 2.20E-01 | 0.59  | 2.79E-01 | 0.01  | 4.95E-01 |
| ZMYM1    | 0.77 | 2.20E-01 | 0.26  | 3.97E-01 | 0.58  | 2.81E-01 |
| C16orf87 | 0.77 | 2.20E-01 | 1.34  | 9.07E-02 | -0.37 | 6.43E-01 |
| TBL3     | 0.77 | 2.20E-01 | 0.59  | 2.79E-01 | -0.59 | 7.24E-01 |
| HDAC9    | 0.77 | 2.20E-01 | 0.84  | 2.02E-01 | -0.04 | 5.15E-01 |
| CCR3     | 0.77 | 2.20E-01 | -0.08 | 5.33E-01 | 0.59  | 2.78E-01 |
| PPAP2C   | 0.77 | 2.20E-01 | 0.99  | 1.60E-01 | -1.35 | 9.11E-01 |
| PPP2CB   | 0.77 | 2.20E-01 | 0.22  | 4.14E-01 | -0.08 | 5.32E-01 |
| RSBN1L   | 0.77 | 2.20E-01 | -0.19 | 5.77E-01 | 0.97  | 1.67E-01 |
| CDC42EP4 | 0.77 | 2.20E-01 | 0.85  | 1.98E-01 | -0.01 | 5.03E-01 |
| DCAF8    | 0.77 | 2.20E-01 | 0.47  | 3.19E-01 | -0.03 | 5.13E-01 |
| NMT2     | 0.77 | 2.20E-01 | 0.83  | 2.03E-01 | -0.45 | 6.74E-01 |
| IFNG     | 0.77 | 2.20E-01 | -0.58 | 7.20E-01 | 0.60  | 2.75E-01 |
| SMYD5    | 0.77 | 2.20E-01 | -0.13 | 5.50E-01 | 0.99  | 1.62E-01 |
| HSPB7    | 0.77 | 2.20E-01 | 0.31  | 3.77E-01 | -0.34 | 6.32E-01 |
| NOP2     | 0.77 | 2.20E-01 | 1.22  | 1.11E-01 | -0.74 | 7.70E-01 |
| PLEKHM1  | 0.77 | 2.21E-01 | 1.01  | 1.56E-01 | -0.73 | 7.69E-01 |
| PGAM2    | 0.77 | 2.21E-01 | 1.10  | 1.35E-01 | -0.93 | 8.23E-01 |
| RAB20    | 0.77 | 2.21E-01 | 0.81  | 2.10E-01 | 0.06  | 4.77E-01 |
| MEP1A    | 0.77 | 2.21E-01 | 0.80  | 2.11E-01 | 0.70  | 2.42E-01 |
| ETNK1    | 0.77 | 2.21E-01 | 0.67  | 2.51E-01 | -0.22 | 5.88E-01 |
| ZBTB44   | 0.77 | 2.21E-01 | 0.57  | 2.83E-01 | -0.46 | 6.78E-01 |
| RPS25    | 0.77 | 2.21E-01 | -0.75 | 7.74E-01 | 1.23  | 1.10E-01 |
| MC5R     | 0.77 | 2.21E-01 | -0.50 | 6.90E-01 | 0.81  | 2.09E-01 |
| CDCP2    | 0.77 | 2.21E-01 | 0.13  | 4.47E-01 | 0.36  | 3.58E-01 |
| POLE4    | 0.77 | 2.21E-01 | 0.82  | 2.06E-01 | -1.19 | 8.83E-01 |
| MRPL34   | 0.77 | 2.21E-01 | 0.80  | 2.13E-01 | -0.40 | 6.56E-01 |
| PRL      | 0.77 | 2.21E-01 | 1.35  | 8.85E-02 | -1.22 | 8.89E-01 |
| CARD11   | 0.77 | 2.21E-01 | -0.42 | 6.61E-01 | 0.79  | 2.14E-01 |
| PPP6R1   | 0.77 | 2.21E-01 | 1.14  | 1.26E-01 | -0.20 | 5.78E-01 |
| ZCCHC17  | 0.77 | 2.22E-01 | -0.86 | 8.04E-01 | 1.13  | 1.29E-01 |

|          |      |          |       |          |       |          |
|----------|------|----------|-------|----------|-------|----------|
| COPS6    | 0.77 | 2.22E-01 | 1.21  | 1.13E-01 | -0.28 | 6.10E-01 |
| SLC27A2  | 0.77 | 2.22E-01 | 1.40  | 8.03E-02 | -0.22 | 5.88E-01 |
| FGL2     | 0.77 | 2.22E-01 | 1.42  | 7.82E-02 | -0.81 | 7.91E-01 |
| BCKDHB   | 0.77 | 2.22E-01 | 0.00  | 5.01E-01 | 2.45  | 7.22E-03 |
| KCNJ1    | 0.77 | 2.22E-01 | 0.70  | 2.43E-01 | 0.44  | 3.28E-01 |
| SPG7     | 0.77 | 2.22E-01 | 0.26  | 3.96E-01 | -0.09 | 5.38E-01 |
| ZNF814   | 0.77 | 2.22E-01 | 0.52  | 3.02E-01 | -0.18 | 5.72E-01 |
| MTOR     | 0.77 | 2.22E-01 | 0.42  | 3.39E-01 | 0.01  | 4.98E-01 |
| C20orf78 | 0.77 | 2.22E-01 | 0.04  | 4.84E-01 | -0.06 | 5.24E-01 |
| VNN3     | 0.77 | 2.22E-01 | -0.16 | 5.64E-01 | 0.57  | 2.85E-01 |
| C7orf55  | 0.77 | 2.22E-01 | 0.21  | 4.17E-01 | 0.33  | 3.69E-01 |
| PDE5A    | 0.76 | 2.22E-01 | 0.29  | 3.87E-01 | -0.22 | 5.85E-01 |
| TAF11    | 0.76 | 2.22E-01 | -1.75 | 9.60E-01 | 1.87  | 3.09E-02 |
| MRS2     | 0.76 | 2.22E-01 | 0.95  | 1.70E-01 | -0.54 | 7.07E-01 |
| SEPSECS  | 0.76 | 2.23E-01 | 0.80  | 2.12E-01 | -0.37 | 6.42E-01 |
| NSD1     | 0.76 | 2.23E-01 | -0.30 | 6.18E-01 | 0.23  | 4.11E-01 |
| EPHA3    | 0.76 | 2.23E-01 | -0.61 | 7.28E-01 | 0.72  | 2.35E-01 |
| GRHL2    | 0.76 | 2.23E-01 | 0.21  | 4.19E-01 | 2.31  | 1.06E-02 |
| CAMK1D   | 0.76 | 2.23E-01 | 0.89  | 1.86E-01 | 0.38  | 3.52E-01 |
| CHN2     | 0.76 | 2.23E-01 | -0.75 | 7.72E-01 | 0.58  | 2.80E-01 |
| TUBA1C   | 0.76 | 2.23E-01 | 1.63  | 5.15E-02 | -0.95 | 8.29E-01 |
| SLC38A4  | 0.76 | 2.23E-01 | -1.00 | 8.42E-01 | 1.49  | 6.78E-02 |
| DCUN1D2  | 0.76 | 2.23E-01 | -0.45 | 6.75E-01 | 0.53  | 3.00E-01 |
| C17orf58 | 0.76 | 2.23E-01 | 0.63  | 2.65E-01 | -0.39 | 6.52E-01 |
| CD40     | 0.76 | 2.23E-01 | 1.36  | 8.62E-02 | 0.29  | 3.88E-01 |
| DUOX1    | 0.76 | 2.23E-01 | 0.15  | 4.42E-01 | 0.71  | 2.40E-01 |
| SOX12    | 0.76 | 2.23E-01 | 2.71  | 3.41E-03 | 0.83  | 2.03E-01 |
| ULK1     | 0.76 | 2.23E-01 | -1.39 | 9.18E-01 | 1.27  | 1.03E-01 |
| FAM198B  | 0.76 | 2.23E-01 | 0.30  | 3.82E-01 | 1.44  | 7.55E-02 |
| UBP1     | 0.76 | 2.23E-01 | 0.19  | 4.26E-01 | 1.87  | 3.10E-02 |
| SH3D19   | 0.76 | 2.23E-01 | -0.02 | 5.08E-01 | 0.45  | 3.27E-01 |

|                |      |          |       |          |       |          |
|----------------|------|----------|-------|----------|-------|----------|
| ATP6V1H        | 0.76 | 2.23E-01 | 2.11  | 1.74E-02 | -0.01 | 5.04E-01 |
| DDX19B         | 0.76 | 2.23E-01 | 1.17  | 1.21E-01 | 1.19  | 1.17E-01 |
| SERPINB12      | 0.76 | 2.23E-01 | -2.40 | 9.92E-01 | 1.85  | 3.18E-02 |
| KLHDC8B        | 0.76 | 2.23E-01 | -1.77 | 9.62E-01 | 2.12  | 1.72E-02 |
| TM4SF4         | 0.76 | 2.23E-01 | 0.15  | 4.39E-01 | 1.08  | 1.40E-01 |
| RPSA           | 0.76 | 2.23E-01 | 1.58  | 5.72E-02 | -0.59 | 7.21E-01 |
| KIAA1549       | 0.76 | 2.23E-01 | 2.09  | 1.83E-02 | -0.92 | 8.21E-01 |
| KLRG1          | 0.76 | 2.23E-01 | -0.67 | 7.47E-01 | 1.10  | 1.36E-01 |
| LPO            | 0.76 | 2.23E-01 | 0.85  | 1.98E-01 | -0.25 | 5.98E-01 |
| ZNF570         | 0.76 | 2.24E-01 | 0.55  | 2.90E-01 | -0.56 | 7.11E-01 |
| CIRBP          | 0.76 | 2.24E-01 | -0.63 | 7.35E-01 | 1.15  | 1.26E-01 |
| TNFSF14        | 0.76 | 2.24E-01 | 0.40  | 3.43E-01 | -0.75 | 7.73E-01 |
| PAX5           | 0.76 | 2.24E-01 | 0.72  | 2.35E-01 | 1.66  | 4.88E-02 |
| MOBP           | 0.76 | 2.24E-01 | 0.11  | 4.57E-01 | 0.11  | 4.56E-01 |
| DCAF4          | 0.76 | 2.24E-01 | 0.26  | 3.96E-01 | 1.43  | 7.63E-02 |
| CNR2           | 0.76 | 2.24E-01 | -0.67 | 7.50E-01 | 1.66  | 4.82E-02 |
| GSTA1          | 0.76 | 2.24E-01 | -0.33 | 6.29E-01 | 0.67  | 2.52E-01 |
| ALKBH5         | 0.76 | 2.24E-01 | -0.06 | 5.24E-01 | 1.03  | 1.52E-01 |
| CLSPN          | 0.76 | 2.24E-01 | 0.22  | 4.12E-01 | 0.65  | 2.58E-01 |
| HNRNPA3        | 0.76 | 2.24E-01 | 0.46  | 3.24E-01 | 1.63  | 5.14E-02 |
| HIST1H4B       | 0.76 | 2.24E-01 | 0.89  | 1.87E-01 | -0.78 | 7.81E-01 |
| HACL1          | 0.76 | 2.24E-01 | -0.32 | 6.27E-01 | 0.59  | 2.78E-01 |
| AC009365.3     | 0.76 | 2.24E-01 | 1.95  | 2.59E-02 | -1.66 | 9.52E-01 |
| IRGM           | 0.76 | 2.24E-01 | 2.25  | 1.21E-02 | -0.36 | 6.42E-01 |
| CCDC178        | 0.76 | 2.24E-01 | 0.33  | 3.71E-01 | 0.08  | 4.68E-01 |
| JMJD7          | 0.76 | 2.24E-01 | 0.13  | 4.47E-01 | -0.36 | 6.41E-01 |
| SYNE1          | 0.76 | 2.24E-01 | 0.82  | 2.07E-01 | -0.49 | 6.88E-01 |
| RGL3           | 0.76 | 2.24E-01 | 0.36  | 3.61E-01 | -0.07 | 5.26E-01 |
| HSPB2-C11orf52 | 0.76 | 2.25E-01 | 1.31  | 9.53E-02 | -0.71 | 7.62E-01 |
| BTF3L4         | 0.76 | 2.25E-01 | 0.08  | 4.69E-01 | 0.26  | 3.96E-01 |
| HNF1A          | 0.76 | 2.25E-01 | -0.50 | 6.91E-01 | 1.07  | 1.43E-01 |

|           |      |          |       |          |       |          |
|-----------|------|----------|-------|----------|-------|----------|
| ASAP3     | 0.76 | 2.25E-01 | 1.50  | 6.64E-02 | 1.55  | 6.09E-02 |
| GPC5      | 0.76 | 2.25E-01 | -0.51 | 6.94E-01 | 1.23  | 1.10E-01 |
| ACSBG2    | 0.76 | 2.25E-01 | 1.28  | 9.99E-02 | -1.10 | 8.63E-01 |
| TMEM260   | 0.76 | 2.25E-01 | 1.25  | 1.05E-01 | -0.23 | 5.91E-01 |
| MALSU1    | 0.76 | 2.25E-01 | 0.52  | 3.00E-01 | -0.24 | 5.95E-01 |
| OR6M1     | 0.76 | 2.25E-01 | 0.82  | 2.06E-01 | -0.28 | 6.12E-01 |
| PLCH2     | 0.76 | 2.25E-01 | -0.90 | 8.16E-01 | 1.05  | 1.47E-01 |
| C11orf89  | 0.76 | 2.25E-01 | -0.04 | 5.16E-01 | 0.05  | 4.78E-01 |
| HFE       | 0.76 | 2.25E-01 | -0.05 | 5.20E-01 | -0.38 | 6.46E-01 |
| DNAJA4    | 0.76 | 2.25E-01 | -0.54 | 7.04E-01 | 2.03  | 2.10E-02 |
| NEFH      | 0.76 | 2.25E-01 | -0.82 | 7.94E-01 | 1.70  | 4.46E-02 |
| SLC12A2   | 0.75 | 2.25E-01 | 0.41  | 3.39E-01 | -0.06 | 5.23E-01 |
| LPAR5     | 0.75 | 2.25E-01 | 1.04  | 1.49E-01 | -0.37 | 6.44E-01 |
| COPG1     | 0.75 | 2.25E-01 | -0.64 | 7.40E-01 | 1.65  | 4.91E-02 |
| LEPR      | 0.75 | 2.25E-01 | 0.94  | 1.73E-01 | -0.30 | 6.17E-01 |
| ANAPC15   | 0.75 | 2.25E-01 | 0.62  | 2.67E-01 | 0.00  | 5.00E-01 |
| CDK19     | 0.75 | 2.25E-01 | 0.84  | 2.01E-01 | 0.68  | 2.50E-01 |
| ZNF577    | 0.75 | 2.25E-01 | -1.24 | 8.93E-01 | 1.07  | 1.43E-01 |
| C4orf29   | 0.75 | 2.25E-01 | 0.94  | 1.73E-01 | 0.20  | 4.21E-01 |
| FIBIN     | 0.75 | 2.26E-01 | 1.00  | 1.58E-01 | -1.14 | 8.73E-01 |
| PHLPP2    | 0.75 | 2.26E-01 | 0.08  | 4.69E-01 | 1.34  | 9.05E-02 |
| CARS2     | 0.75 | 2.26E-01 | 0.67  | 2.50E-01 | 0.86  | 1.96E-01 |
| ZSCAN32   | 0.75 | 2.26E-01 | -0.34 | 6.32E-01 | 0.68  | 2.49E-01 |
| NFIC      | 0.75 | 2.26E-01 | 1.03  | 1.52E-01 | 0.75  | 2.27E-01 |
| ST3GAL6   | 0.75 | 2.26E-01 | -0.67 | 7.49E-01 | 2.10  | 1.80E-02 |
| SERPINA10 | 0.75 | 2.26E-01 | -0.18 | 5.71E-01 | 1.35  | 8.90E-02 |
| CRYAB     | 0.75 | 2.26E-01 | 1.42  | 7.72E-02 | -0.84 | 7.98E-01 |
| PLL       | 0.75 | 2.26E-01 | 0.23  | 4.08E-01 | 0.78  | 2.18E-01 |
| MS4A3     | 0.75 | 2.26E-01 | 0.25  | 4.02E-01 | 0.02  | 4.90E-01 |
| C14orf64  | 0.75 | 2.26E-01 | 0.37  | 3.56E-01 | 0.75  | 2.26E-01 |
| PEX5      | 0.75 | 2.26E-01 | 0.07  | 4.73E-01 | 0.21  | 4.18E-01 |

|           |      |          |       |          |       |          |
|-----------|------|----------|-------|----------|-------|----------|
| GNG2      | 0.75 | 2.26E-01 | 0.97  | 1.66E-01 | 0.06  | 4.76E-01 |
| MFI2      | 0.75 | 2.26E-01 | 0.99  | 1.60E-01 | -0.91 | 8.18E-01 |
| SNURF     | 0.75 | 2.26E-01 | -0.09 | 5.36E-01 | 0.00  | 5.01E-01 |
| C16orf52  | 0.75 | 2.26E-01 | 1.14  | 1.28E-01 | 0.59  | 2.79E-01 |
| PLAG1     | 0.75 | 2.26E-01 | 0.27  | 3.92E-01 | 0.64  | 2.61E-01 |
| KCNJ6     | 0.75 | 2.26E-01 | 0.18  | 4.30E-01 | 0.81  | 2.08E-01 |
| THRSP     | 0.75 | 2.26E-01 | 0.07  | 4.73E-01 | 0.11  | 4.55E-01 |
| OR1Q1     | 0.75 | 2.26E-01 | 0.13  | 4.50E-01 | 0.04  | 4.84E-01 |
| COL15A1   | 0.75 | 2.26E-01 | 2.12  | 1.70E-02 | 0.68  | 2.49E-01 |
| MRPS6     | 0.75 | 2.26E-01 | 1.40  | 8.05E-02 | -0.07 | 5.26E-01 |
| EMC9      | 0.75 | 2.26E-01 | 0.01  | 4.94E-01 | 0.29  | 3.85E-01 |
| FUT11     | 0.75 | 2.27E-01 | 0.26  | 3.99E-01 | 0.44  | 3.29E-01 |
| ASAH2B    | 0.75 | 2.27E-01 | 0.36  | 3.59E-01 | -0.50 | 6.92E-01 |
| ZMIZ1     | 0.75 | 2.27E-01 | 0.04  | 4.83E-01 | 0.85  | 1.98E-01 |
| WHSC1L1   | 0.75 | 2.27E-01 | 0.12  | 4.52E-01 | 2.40  | 8.16E-03 |
| KIAA1715  | 0.75 | 2.27E-01 | -1.03 | 8.49E-01 | 1.01  | 1.57E-01 |
| ING2      | 0.75 | 2.27E-01 | 0.19  | 4.23E-01 | 1.10  | 1.36E-01 |
| ZFHX4     | 0.75 | 2.27E-01 | 0.61  | 2.70E-01 | -0.25 | 5.98E-01 |
| SYNPR     | 0.75 | 2.27E-01 | -0.08 | 5.31E-01 | 0.30  | 3.82E-01 |
| DDHD2     | 0.75 | 2.27E-01 | 0.08  | 4.67E-01 | 2.48  | 6.53E-03 |
| ABCA6     | 0.75 | 2.27E-01 | 1.02  | 1.54E-01 | -0.34 | 6.33E-01 |
| RNF6      | 0.75 | 2.27E-01 | -0.06 | 5.25E-01 | 0.21  | 4.15E-01 |
| LRRC4C    | 0.75 | 2.27E-01 | 1.61  | 5.37E-02 | 0.33  | 3.71E-01 |
| SNX7      | 0.75 | 2.27E-01 | 0.06  | 4.77E-01 | 0.95  | 1.71E-01 |
| LRRC37B   | 0.75 | 2.27E-01 | 1.41  | 8.00E-02 | -0.10 | 5.41E-01 |
| PTPN21    | 0.75 | 2.27E-01 | 0.82  | 2.06E-01 | 0.05  | 4.80E-01 |
| KIF26A    | 0.75 | 2.27E-01 | 0.48  | 3.17E-01 | 0.89  | 1.87E-01 |
| UST       | 0.75 | 2.27E-01 | -0.27 | 6.06E-01 | -0.12 | 5.49E-01 |
| KRTAP5-10 | 0.75 | 2.27E-01 | -0.04 | 5.18E-01 | 0.24  | 4.04E-01 |
| YIPF4     | 0.75 | 2.27E-01 | -0.30 | 6.19E-01 | 0.43  | 3.33E-01 |
| U2AF1L4   | 0.75 | 2.27E-01 | -0.69 | 7.55E-01 | 1.79  | 3.66E-02 |



|          |      |          |       |          |       |          |
|----------|------|----------|-------|----------|-------|----------|
| PCK2     | 0.75 | 2.27E-01 | 0.00  | 5.00E-01 | -0.27 | 6.06E-01 |
| MANBA    | 0.75 | 2.28E-01 | 0.49  | 3.12E-01 | -0.15 | 5.59E-01 |
| FXR2     | 0.75 | 2.28E-01 | 1.96  | 2.52E-02 | 0.77  | 2.19E-01 |
| HIST1H3C | 0.75 | 2.28E-01 | 0.35  | 3.65E-01 | -0.39 | 6.50E-01 |
| SLC43A1  | 0.75 | 2.28E-01 | 0.69  | 2.45E-01 | 0.16  | 4.37E-01 |
| UGGT2    | 0.75 | 2.28E-01 | 0.94  | 1.74E-01 | 0.19  | 4.26E-01 |
| PELI2    | 0.75 | 2.28E-01 | 0.92  | 1.78E-01 | 2.22  | 1.32E-02 |
| BIRC6    | 0.75 | 2.28E-01 | 0.14  | 4.43E-01 | 0.25  | 4.03E-01 |
| TIA1     | 0.75 | 2.28E-01 | 0.72  | 2.34E-01 | -0.35 | 6.36E-01 |
| ABHD3    | 0.75 | 2.28E-01 | 1.42  | 7.77E-02 | -1.83 | 9.67E-01 |
| SREBF1   | 0.75 | 2.28E-01 | 2.11  | 1.76E-02 | 0.00  | 4.99E-01 |
| ANKRD65  | 0.74 | 2.28E-01 | 1.05  | 1.47E-01 | -0.02 | 5.09E-01 |
| ACHE     | 0.74 | 2.28E-01 | 0.33  | 3.70E-01 | -0.26 | 6.02E-01 |
| HOGA1    | 0.74 | 2.28E-01 | -1.46 | 9.28E-01 | 1.41  | 7.90E-02 |
| GINS2    | 0.74 | 2.28E-01 | 0.46  | 3.22E-01 | 0.43  | 3.32E-01 |
| ENPP3    | 0.74 | 2.28E-01 | 0.09  | 4.64E-01 | 0.43  | 3.35E-01 |
| ZNF587   | 0.74 | 2.28E-01 | 0.15  | 4.39E-01 | -0.05 | 5.21E-01 |
| DRD5     | 0.74 | 2.29E-01 | -0.83 | 7.96E-01 | 1.70  | 4.46E-02 |
| C9orf40  | 0.74 | 2.29E-01 | -0.38 | 6.49E-01 | 1.15  | 1.25E-01 |
| APOBEC1  | 0.74 | 2.29E-01 | 0.90  | 1.83E-01 | -0.20 | 5.79E-01 |
| SMC1B    | 0.74 | 2.29E-01 | 0.69  | 2.46E-01 | -0.05 | 5.18E-01 |
| WWP1     | 0.74 | 2.29E-01 | 0.90  | 1.83E-01 | -0.64 | 7.40E-01 |
| GLYAT    | 0.74 | 2.29E-01 | 0.85  | 1.98E-01 | 2.60  | 4.61E-03 |
| CRYGS    | 0.74 | 2.29E-01 | -0.49 | 6.90E-01 | 0.87  | 1.91E-01 |
| GPRC6A   | 0.74 | 2.29E-01 | 0.92  | 1.80E-01 | -0.73 | 7.67E-01 |
| SIRPB2   | 0.74 | 2.29E-01 | 0.74  | 2.28E-01 | -1.02 | 8.47E-01 |
| NPY2R    | 0.74 | 2.29E-01 | 0.76  | 2.24E-01 | -0.93 | 8.25E-01 |
| DOT1L    | 0.74 | 2.29E-01 | -0.42 | 6.64E-01 | 0.37  | 3.57E-01 |
| PIK3C2B  | 0.74 | 2.29E-01 | 0.25  | 4.02E-01 | 0.74  | 2.31E-01 |
| NPR1     | 0.74 | 2.29E-01 | -1.56 | 9.41E-01 | 1.64  | 5.06E-02 |
| INTS1    | 0.74 | 2.29E-01 | 1.17  | 1.21E-01 | -0.89 | 8.15E-01 |

|          |      |          |       |          |       |          |
|----------|------|----------|-------|----------|-------|----------|
| MDGA2    | 0.74 | 2.30E-01 | 0.03  | 4.89E-01 | 1.78  | 3.74E-02 |
| CYTH1    | 0.74 | 2.30E-01 | 0.10  | 4.60E-01 | 0.52  | 3.01E-01 |
| PLK3     | 0.74 | 2.30E-01 | 2.43  | 7.59E-03 | -0.20 | 5.78E-01 |
| CARTPT   | 0.74 | 2.30E-01 | -0.15 | 5.59E-01 | 0.16  | 4.37E-01 |
| GRK4     | 0.74 | 2.30E-01 | 0.03  | 4.87E-01 | 0.38  | 3.52E-01 |
| TCP10L2  | 0.74 | 2.30E-01 | 1.32  | 9.36E-02 | 1.65  | 4.96E-02 |
| PSMC6    | 0.74 | 2.30E-01 | 1.16  | 1.23E-01 | -0.92 | 8.22E-01 |
| MDGA2    | 0.74 | 2.30E-01 | 0.03  | 4.90E-01 | 1.78  | 3.77E-02 |
| GNAZ     | 0.74 | 2.30E-01 | 0.14  | 4.42E-01 | 0.74  | 2.29E-01 |
| FAM76B   | 0.74 | 2.30E-01 | -0.99 | 8.40E-01 | 1.84  | 3.27E-02 |
| FOXN1    | 0.74 | 2.30E-01 | 0.64  | 2.62E-01 | -0.67 | 7.47E-01 |
| RSU1     | 0.74 | 2.30E-01 | 1.24  | 1.07E-01 | -1.41 | 9.21E-01 |
| PKN2     | 0.74 | 2.30E-01 | -1.42 | 9.22E-01 | 1.64  | 5.09E-02 |
| CSN3     | 0.74 | 2.30E-01 | 0.23  | 4.09E-01 | -0.36 | 6.39E-01 |
| SMARCA5  | 0.74 | 2.31E-01 | -0.65 | 7.41E-01 | 1.07  | 1.42E-01 |
| IPO8     | 0.74 | 2.31E-01 | -0.78 | 7.83E-01 | 1.68  | 4.62E-02 |
| MSLNL    | 0.74 | 2.31E-01 | 0.84  | 2.01E-01 | -0.38 | 6.47E-01 |
| TECTA    | 0.74 | 2.31E-01 | 0.48  | 3.14E-01 | -0.25 | 5.98E-01 |
| KIAA1244 | 0.74 | 2.31E-01 | -0.24 | 5.96E-01 | 1.57  | 5.83E-02 |
| LETM2    | 0.74 | 2.31E-01 | -0.50 | 6.92E-01 | 2.13  | 1.67E-02 |
| ZBTB11   | 0.74 | 2.31E-01 | -0.70 | 7.57E-01 | 1.01  | 1.56E-01 |
| CTSG     | 0.74 | 2.31E-01 | -0.55 | 7.07E-01 | 1.43  | 7.60E-02 |
| NUDT6    | 0.74 | 2.31E-01 | -0.98 | 8.37E-01 | 1.27  | 1.02E-01 |
| LRRC6    | 0.74 | 2.31E-01 | 1.21  | 1.13E-01 | 0.51  | 3.06E-01 |
| CMIP     | 0.74 | 2.31E-01 | 1.80  | 3.57E-02 | 0.59  | 2.78E-01 |
| NCAPG    | 0.73 | 2.31E-01 | 1.43  | 7.57E-02 | 0.79  | 2.14E-01 |
| TMEM86A  | 0.73 | 2.31E-01 | -0.77 | 7.79E-01 | 0.77  | 2.21E-01 |
| KIAA1143 | 0.73 | 2.31E-01 | 1.06  | 1.44E-01 | 0.19  | 4.24E-01 |
| TM6SF1   | 0.73 | 2.31E-01 | 0.61  | 2.70E-01 | 2.16  | 1.52E-02 |
| ZNF394   | 0.73 | 2.32E-01 | -0.66 | 7.45E-01 | 0.60  | 2.74E-01 |
| TAF10    | 0.73 | 2.32E-01 | -0.72 | 7.63E-01 | 0.97  | 1.65E-01 |

|               |      |          |       |          |       |          |
|---------------|------|----------|-------|----------|-------|----------|
| LRRN4         | 0.73 | 2.32E-01 | -0.56 | 7.12E-01 | 1.12  | 1.32E-01 |
| RP11-307N16.6 | 0.73 | 2.32E-01 | 0.57  | 2.84E-01 | 0.05  | 4.79E-01 |
| FAM177B       | 0.73 | 2.32E-01 | 0.33  | 3.70E-01 | -0.42 | 6.64E-01 |
| MRPL30        | 0.73 | 2.32E-01 | 0.21  | 4.19E-01 | 0.74  | 2.30E-01 |
| TPH2          | 0.73 | 2.32E-01 | 2.26  | 1.19E-02 | -1.13 | 8.71E-01 |
| ACSM5         | 0.73 | 2.32E-01 | 1.27  | 1.02E-01 | -0.72 | 7.65E-01 |
| NAB1          | 0.73 | 2.32E-01 | 0.35  | 3.64E-01 | -0.54 | 7.07E-01 |
| YWHAE         | 0.73 | 2.32E-01 | -0.56 | 7.11E-01 | 0.27  | 3.95E-01 |
| TFPI2         | 0.73 | 2.32E-01 | -0.41 | 6.58E-01 | 0.58  | 2.80E-01 |
| LHFPL5        | 0.73 | 2.32E-01 | 0.08  | 4.68E-01 | 0.16  | 4.36E-01 |
| NAALADL1      | 0.73 | 2.32E-01 | 2.75  | 2.97E-03 | 0.78  | 2.17E-01 |
| ZNF496        | 0.73 | 2.33E-01 | -0.65 | 7.41E-01 | 0.98  | 1.64E-01 |
| PLD5          | 0.73 | 2.33E-01 | -0.35 | 6.36E-01 | 1.69  | 4.59E-02 |
| MBLAC1        | 0.73 | 2.33E-01 | -0.55 | 7.10E-01 | 0.67  | 2.53E-01 |
| CCDC61        | 0.73 | 2.33E-01 | 0.42  | 3.38E-01 | 0.37  | 3.55E-01 |
| ZBTB38        | 0.73 | 2.33E-01 | -0.71 | 7.61E-01 | 1.21  | 1.12E-01 |
| PSTPIP2       | 0.73 | 2.33E-01 | -0.14 | 5.56E-01 | 0.54  | 2.95E-01 |
| HUNK          | 0.73 | 2.33E-01 | 1.15  | 1.25E-01 | 0.80  | 2.12E-01 |
| ATP4B         | 0.73 | 2.33E-01 | 0.18  | 4.30E-01 | -0.16 | 5.62E-01 |
| PALM3         | 0.73 | 2.33E-01 | 0.83  | 2.03E-01 | -0.04 | 5.17E-01 |
| TBC1D19       | 0.73 | 2.33E-01 | -0.03 | 5.14E-01 | 0.09  | 4.63E-01 |
| SLC35F6       | 0.73 | 2.33E-01 | 0.23  | 4.08E-01 | 0.11  | 4.56E-01 |
| C1QTNF3       | 0.73 | 2.33E-01 | 1.78  | 3.74E-02 | -1.01 | 8.43E-01 |
| LCOR          | 0.73 | 2.33E-01 | 0.51  | 3.05E-01 | -0.19 | 5.74E-01 |
| C5orf58       | 0.73 | 2.33E-01 | 0.03  | 4.87E-01 | 0.04  | 4.83E-01 |
| CSNK1E        | 0.73 | 2.33E-01 | -0.25 | 5.99E-01 | 0.86  | 1.96E-01 |
| CERS3         | 0.73 | 2.33E-01 | -0.56 | 7.12E-01 | 0.46  | 3.24E-01 |
| ADAMTSL1      | 0.73 | 2.33E-01 | 0.04  | 4.85E-01 | 0.73  | 2.32E-01 |
| IFI30         | 0.73 | 2.33E-01 | 0.82  | 2.06E-01 | -0.54 | 7.05E-01 |
| PRR7          | 0.73 | 2.33E-01 | 1.48  | 7.00E-02 | -0.06 | 5.25E-01 |
| NIPSNAP3B     | 0.73 | 2.33E-01 | 0.43  | 3.33E-01 | 0.62  | 2.67E-01 |

|          |      |          |       |          |       |          |
|----------|------|----------|-------|----------|-------|----------|
| FGFBP1   | 0.73 | 2.33E-01 | -0.26 | 6.03E-01 | 0.27  | 3.95E-01 |
| ERGIC2   | 0.73 | 2.33E-01 | -0.95 | 8.29E-01 | 1.84  | 3.28E-02 |
| UPK2     | 0.73 | 2.33E-01 | -0.60 | 7.26E-01 | 2.48  | 6.50E-03 |
| SEC23A   | 0.73 | 2.34E-01 | -0.46 | 6.77E-01 | 1.70  | 4.49E-02 |
| CYC1     | 0.73 | 2.34E-01 | 0.42  | 3.38E-01 | 0.13  | 4.50E-01 |
| CHAC2    | 0.73 | 2.34E-01 | 0.63  | 2.63E-01 | -1.01 | 8.44E-01 |
| DDN      | 0.73 | 2.34E-01 | -0.37 | 6.44E-01 | 0.44  | 3.31E-01 |
| CEL      | 0.73 | 2.34E-01 | -1.78 | 9.63E-01 | 2.06  | 1.99E-02 |
| PAQR9    | 0.73 | 2.34E-01 | 1.48  | 7.00E-02 | -0.41 | 6.60E-01 |
| SPCS1    | 0.73 | 2.34E-01 | -0.44 | 6.69E-01 | 0.34  | 3.68E-01 |
| RD3L     | 0.73 | 2.34E-01 | 1.11  | 1.34E-01 | -1.18 | 8.80E-01 |
| APMAP    | 0.73 | 2.34E-01 | -1.24 | 8.93E-01 | 1.64  | 5.08E-02 |
| FAM213A  | 0.73 | 2.34E-01 | -0.15 | 5.59E-01 | 0.78  | 2.18E-01 |
| IL11     | 0.73 | 2.34E-01 | 0.59  | 2.76E-01 | 0.15  | 4.42E-01 |
| FGF1     | 0.73 | 2.34E-01 | 1.05  | 1.47E-01 | 0.21  | 4.15E-01 |
| MINA     | 0.73 | 2.34E-01 | 1.05  | 1.48E-01 | -0.92 | 8.20E-01 |
| HOXD8    | 0.73 | 2.34E-01 | 1.27  | 1.01E-01 | -2.00 | 9.77E-01 |
| CENPU    | 0.72 | 2.34E-01 | -0.07 | 5.27E-01 | 0.76  | 2.22E-01 |
| LRRC36   | 0.72 | 2.34E-01 | -1.40 | 9.19E-01 | 1.34  | 8.96E-02 |
| SGSM1    | 0.72 | 2.34E-01 | 1.63  | 5.14E-02 | 0.14  | 4.45E-01 |
| TBC1D2   | 0.72 | 2.34E-01 | 1.10  | 1.35E-01 | -0.46 | 6.76E-01 |
| RAD51C   | 0.72 | 2.34E-01 | 1.42  | 7.83E-02 | -0.41 | 6.58E-01 |
| MFSD9    | 0.72 | 2.34E-01 | 0.30  | 3.80E-01 | 0.75  | 2.27E-01 |
| FRK      | 0.72 | 2.35E-01 | 1.40  | 8.09E-02 | -0.63 | 7.36E-01 |
| GPR98    | 0.72 | 2.35E-01 | 0.58  | 2.81E-01 | -0.89 | 8.13E-01 |
| RHOJ     | 0.72 | 2.35E-01 | 0.26  | 3.98E-01 | 0.80  | 2.11E-01 |
| PRCP     | 0.72 | 2.35E-01 | -0.28 | 6.09E-01 | 2.43  | 7.65E-03 |
| SP140    | 0.72 | 2.35E-01 | -0.72 | 7.65E-01 | 2.96  | 1.56E-03 |
| C9orf170 | 0.72 | 2.35E-01 | 1.54  | 6.12E-02 | -1.35 | 9.11E-01 |
| ZNF793   | 0.72 | 2.35E-01 | 0.35  | 3.62E-01 | -0.36 | 6.41E-01 |
| PEX19    | 0.72 | 2.35E-01 | 1.03  | 1.50E-01 | -0.61 | 7.30E-01 |

|             |      |          |       |          |       |          |
|-------------|------|----------|-------|----------|-------|----------|
| EXOC4       | 0.72 | 2.35E-01 | 2.00  | 2.26E-02 | 0.15  | 4.40E-01 |
| CDCA5       | 0.72 | 2.35E-01 | 2.07  | 1.94E-02 | -0.48 | 6.83E-01 |
| WDR5B       | 0.72 | 2.35E-01 | 0.78  | 2.17E-01 | -0.31 | 6.21E-01 |
| C6orf118    | 0.72 | 2.35E-01 | 0.39  | 3.47E-01 | -0.62 | 7.33E-01 |
| DLGAP2      | 0.72 | 2.35E-01 | 0.58  | 2.80E-01 | 0.38  | 3.51E-01 |
| OR9K2       | 0.72 | 2.35E-01 | -1.35 | 9.11E-01 | 1.10  | 1.35E-01 |
| HIST1H2BA   | 0.72 | 2.35E-01 | -0.66 | 7.46E-01 | 0.87  | 1.92E-01 |
| RIMKLB      | 0.72 | 2.35E-01 | -0.75 | 7.72E-01 | 1.17  | 1.21E-01 |
| ETNK2       | 0.72 | 2.35E-01 | 1.31  | 9.44E-02 | 1.50  | 6.74E-02 |
| KDM4A       | 0.72 | 2.35E-01 | 0.70  | 2.41E-01 | -0.54 | 7.06E-01 |
| HEXB        | 0.72 | 2.35E-01 | -0.65 | 7.42E-01 | 1.00  | 1.58E-01 |
| STK25       | 0.72 | 2.35E-01 | 0.50  | 3.10E-01 | -0.44 | 6.71E-01 |
| SLC29A4     | 0.72 | 2.35E-01 | -0.35 | 6.37E-01 | 0.27  | 3.93E-01 |
| GJC3        | 0.72 | 2.35E-01 | 0.84  | 2.00E-01 | -0.10 | 5.38E-01 |
| MDH1B       | 0.72 | 2.35E-01 | 0.03  | 4.88E-01 | 0.92  | 1.78E-01 |
| ATF7        | 0.72 | 2.35E-01 | 0.25  | 4.03E-01 | -0.40 | 6.55E-01 |
| LRTOMT      | 0.72 | 2.36E-01 | 0.77  | 2.20E-01 | -0.22 | 5.89E-01 |
| TSSK2       | 0.72 | 2.36E-01 | 0.95  | 1.71E-01 | -1.18 | 8.81E-01 |
| FTSJ2       | 0.72 | 2.36E-01 | -0.21 | 5.84E-01 | 1.63  | 5.21E-02 |
| ASB10       | 0.72 | 2.36E-01 | -0.11 | 5.43E-01 | 0.00  | 4.99E-01 |
| CORO1A      | 0.72 | 2.36E-01 | 1.16  | 1.23E-01 | -0.48 | 6.85E-01 |
| TMX2-CTNND1 | 0.72 | 2.36E-01 | 1.24  | 1.08E-01 | 0.27  | 3.94E-01 |
| C9orf172    | 0.72 | 2.36E-01 | 1.75  | 3.97E-02 | -0.63 | 7.35E-01 |
| ERCC1       | 0.72 | 2.36E-01 | 0.41  | 3.42E-01 | -0.03 | 5.14E-01 |
| C3orf22     | 0.72 | 2.36E-01 | -0.42 | 6.63E-01 | 0.40  | 3.44E-01 |
| NAT14       | 0.72 | 2.36E-01 | 0.46  | 3.24E-01 | -0.33 | 6.31E-01 |
| TIAF1       | 0.72 | 2.36E-01 | -0.75 | 7.72E-01 | 1.92  | 2.73E-02 |
| WNT7A       | 0.72 | 2.36E-01 | 0.88  | 1.88E-01 | 0.92  | 1.79E-01 |
| NPSR1       | 0.72 | 2.36E-01 | 0.08  | 4.69E-01 | 1.89  | 2.93E-02 |
| HERC5       | 0.72 | 2.36E-01 | 1.02  | 1.54E-01 | 0.66  | 2.54E-01 |
| RBM38       | 0.72 | 2.36E-01 | -0.83 | 7.96E-01 | 1.19  | 1.16E-01 |

|          |      |          |       |          |       |          |
|----------|------|----------|-------|----------|-------|----------|
| ABCA10   | 0.72 | 2.36E-01 | 1.27  | 1.03E-01 | -0.43 | 6.67E-01 |
| PNMAL2   | 0.72 | 2.37E-01 | 0.68  | 2.49E-01 | 0.24  | 4.05E-01 |
| ZNF443   | 0.72 | 2.37E-01 | -0.12 | 5.48E-01 | 0.15  | 4.39E-01 |
| GTF3C1   | 0.72 | 2.37E-01 | 0.76  | 2.23E-01 | -0.81 | 7.90E-01 |
| ZBED6    | 0.72 | 2.37E-01 | -0.16 | 5.64E-01 | -0.05 | 5.19E-01 |
| CTNNAL1  | 0.72 | 2.37E-01 | 1.80  | 3.60E-02 | -1.51 | 9.35E-01 |
| ARL14EPL | 0.72 | 2.37E-01 | 0.72  | 2.37E-01 | -0.64 | 7.38E-01 |
| TSKS     | 0.72 | 2.37E-01 | 0.41  | 3.42E-01 | -0.26 | 6.01E-01 |
| AFF3     | 0.72 | 2.37E-01 | 1.89  | 2.95E-02 | -0.56 | 7.12E-01 |
| ATG16L2  | 0.72 | 2.37E-01 | -0.07 | 5.30E-01 | 0.40  | 3.45E-01 |
| RELB     | 0.72 | 2.37E-01 | 0.03  | 4.86E-01 | -0.24 | 5.96E-01 |
| MARCO    | 0.72 | 2.37E-01 | 0.64  | 2.60E-01 | -0.83 | 7.97E-01 |
| CHST11   | 0.72 | 2.37E-01 | -1.20 | 8.85E-01 | 2.85  | 2.18E-03 |
| C11orf31 | 0.72 | 2.37E-01 | 2.11  | 1.76E-02 | -0.15 | 5.59E-01 |
| CA10     | 0.72 | 2.37E-01 | 1.16  | 1.23E-01 | 0.08  | 4.70E-01 |
| DND1     | 0.72 | 2.37E-01 | 0.00  | 4.99E-01 | 0.52  | 3.03E-01 |
| AGT      | 0.72 | 2.37E-01 | 0.76  | 2.24E-01 | -0.33 | 6.28E-01 |
| MATN1    | 0.71 | 2.37E-01 | 1.54  | 6.23E-02 | -0.37 | 6.43E-01 |
| BUB3     | 0.71 | 2.37E-01 | 1.29  | 9.90E-02 | -1.39 | 9.18E-01 |
| C2orf15  | 0.71 | 2.37E-01 | 0.33  | 3.71E-01 | 0.41  | 3.41E-01 |
| LRWD1    | 0.71 | 2.38E-01 | 1.61  | 5.41E-02 | -0.40 | 6.55E-01 |
| CMTM8    | 0.71 | 2.38E-01 | 0.77  | 2.22E-01 | 0.03  | 4.87E-01 |
| C5orf48  | 0.71 | 2.38E-01 | -1.82 | 9.65E-01 | 1.52  | 6.43E-02 |
| MRPL3    | 0.71 | 2.38E-01 | 1.19  | 1.17E-01 | -1.12 | 8.69E-01 |
| TRA2A    | 0.71 | 2.38E-01 | -0.95 | 8.28E-01 | 1.30  | 9.70E-02 |
| CD101    | 0.71 | 2.38E-01 | 0.36  | 3.61E-01 | 1.66  | 4.81E-02 |
| OTUD6B   | 0.71 | 2.38E-01 | 0.27  | 3.94E-01 | 0.42  | 3.35E-01 |
| PALLD    | 0.71 | 2.38E-01 | 0.43  | 3.35E-01 | -0.80 | 7.87E-01 |
| ZSCAN22  | 0.71 | 2.38E-01 | 2.23  | 1.28E-02 | 0.73  | 2.34E-01 |
| TMEM179B | 0.71 | 2.38E-01 | 0.35  | 3.65E-01 | 0.42  | 3.39E-01 |
| LACTB    | 0.71 | 2.38E-01 | 0.06  | 4.76E-01 | 1.32  | 9.26E-02 |

|           |      |          |       |          |       |          |
|-----------|------|----------|-------|----------|-------|----------|
| DHRS12    | 0.71 | 2.39E-01 | 0.29  | 3.86E-01 | -0.19 | 5.73E-01 |
| ETV1      | 0.71 | 2.39E-01 | -0.50 | 6.91E-01 | 0.39  | 3.48E-01 |
| GGT7      | 0.71 | 2.39E-01 | 0.34  | 3.67E-01 | 0.23  | 4.08E-01 |
| NRSN2     | 0.71 | 2.39E-01 | 0.91  | 1.81E-01 | -0.06 | 5.25E-01 |
| ATP6V1C2  | 0.71 | 2.39E-01 | 1.68  | 4.62E-02 | 0.73  | 2.33E-01 |
| CNOT6L    | 0.71 | 2.39E-01 | 1.22  | 1.12E-01 | -0.67 | 7.48E-01 |
| OR10Z1    | 0.71 | 2.39E-01 | 0.67  | 2.52E-01 | -1.10 | 8.63E-01 |
| NPHP1     | 0.71 | 2.39E-01 | 1.33  | 9.16E-02 | -1.54 | 9.38E-01 |
| ZNF622    | 0.71 | 2.39E-01 | -0.04 | 5.18E-01 | 0.64  | 2.62E-01 |
| PRKCE     | 0.71 | 2.39E-01 | -0.97 | 8.34E-01 | 1.46  | 7.21E-02 |
| HOXC10    | 0.71 | 2.39E-01 | -0.08 | 5.33E-01 | 0.17  | 4.33E-01 |
| APBB1     | 0.71 | 2.39E-01 | 0.55  | 2.91E-01 | -0.49 | 6.88E-01 |
| NAA38     | 0.71 | 2.39E-01 | 1.33  | 9.22E-02 | -1.23 | 8.91E-01 |
| PCNXL4    | 0.71 | 2.39E-01 | -0.17 | 5.69E-01 | 0.51  | 3.06E-01 |
| KIAA1875  | 0.71 | 2.39E-01 | 0.30  | 3.81E-01 | 0.23  | 4.11E-01 |
| C16orf89  | 0.71 | 2.39E-01 | -0.95 | 8.29E-01 | 1.06  | 1.45E-01 |
| OR6C74    | 0.71 | 2.39E-01 | -0.62 | 7.34E-01 | 1.15  | 1.25E-01 |
| TTC24     | 0.71 | 2.39E-01 | -0.57 | 7.14E-01 | 1.81  | 3.51E-02 |
| ZNF383    | 0.71 | 2.39E-01 | -0.22 | 5.87E-01 | 0.43  | 3.33E-01 |
| CGRRF1    | 0.71 | 2.39E-01 | 1.06  | 1.44E-01 | -1.19 | 8.83E-01 |
| SPATA31D1 | 0.71 | 2.39E-01 | -0.44 | 6.69E-01 | 0.05  | 4.80E-01 |
| PLEKHA1   | 0.71 | 2.39E-01 | -0.46 | 6.78E-01 | 0.77  | 2.20E-01 |
| ATP13A3   | 0.71 | 2.40E-01 | -0.47 | 6.81E-01 | 0.76  | 2.24E-01 |
| CLEC5A    | 0.71 | 2.40E-01 | 1.35  | 8.90E-02 | -0.94 | 8.26E-01 |
| PRSS42    | 0.71 | 2.40E-01 | 0.39  | 3.48E-01 | 0.38  | 3.53E-01 |
| MCAT      | 0.71 | 2.40E-01 | 0.95  | 1.71E-01 | -0.66 | 7.46E-01 |
| SLC37A1   | 0.71 | 2.40E-01 | -0.61 | 7.31E-01 | 1.18  | 1.19E-01 |
| HSPBAP1   | 0.71 | 2.40E-01 | 0.66  | 2.56E-01 | 0.06  | 4.78E-01 |
| DDX23     | 0.71 | 2.40E-01 | -2.01 | 9.78E-01 | 1.65  | 4.99E-02 |
| PRX       | 0.71 | 2.40E-01 | 1.26  | 1.04E-01 | 0.97  | 1.65E-01 |
| IVL       | 0.71 | 2.40E-01 | 0.48  | 3.15E-01 | 0.20  | 4.22E-01 |

|         |      |          |       |          |       |          |
|---------|------|----------|-------|----------|-------|----------|
| PMS1    | 0.71 | 2.40E-01 | 0.70  | 2.41E-01 | 0.20  | 4.20E-01 |
| PMP2    | 0.71 | 2.40E-01 | 1.04  | 1.48E-01 | 1.78  | 3.75E-02 |
| QRFP    | 0.71 | 2.40E-01 | 1.37  | 8.53E-02 | -1.07 | 8.58E-01 |
| UPF2    | 0.71 | 2.40E-01 | 0.83  | 2.04E-01 | -0.04 | 5.15E-01 |
| GGNBP1  | 0.71 | 2.40E-01 | 1.26  | 1.05E-01 | -0.28 | 6.12E-01 |
| KIT     | 0.71 | 2.40E-01 | 1.29  | 9.81E-02 | -0.68 | 7.52E-01 |
| FZD8    | 0.71 | 2.40E-01 | 0.77  | 2.20E-01 | -0.94 | 8.26E-01 |
| ABHD2   | 0.71 | 2.40E-01 | 0.26  | 3.97E-01 | 1.29  | 9.87E-02 |
| GNPNAT1 | 0.71 | 2.40E-01 | 1.36  | 8.69E-02 | -1.21 | 8.87E-01 |
| DPYSL2  | 0.70 | 2.40E-01 | 0.90  | 1.83E-01 | -0.33 | 6.28E-01 |
| EIF4A2  | 0.70 | 2.41E-01 | 0.60  | 2.76E-01 | -0.67 | 7.47E-01 |
| UBALD1  | 0.70 | 2.41E-01 | 0.73  | 2.32E-01 | -0.38 | 6.47E-01 |
| KLHL21  | 0.70 | 2.41E-01 | 0.59  | 2.77E-01 | 0.26  | 3.96E-01 |
| OR8D2   | 0.70 | 2.41E-01 | -0.19 | 5.75E-01 | 0.44  | 3.30E-01 |
| OR2W3   | 0.70 | 2.41E-01 | 0.92  | 1.79E-01 | -0.37 | 6.44E-01 |
| RAB40B  | 0.70 | 2.41E-01 | 0.25  | 4.02E-01 | -0.17 | 5.69E-01 |
| MAST3   | 0.70 | 2.41E-01 | 0.49  | 3.11E-01 | 0.32  | 3.73E-01 |
| OR2F1   | 0.70 | 2.41E-01 | 0.11  | 4.58E-01 | 1.95  | 2.58E-02 |
| KLF2    | 0.70 | 2.41E-01 | 0.92  | 1.80E-01 | 0.19  | 4.25E-01 |
| SLC7A11 | 0.70 | 2.41E-01 | 0.39  | 3.48E-01 | -0.32 | 6.26E-01 |
| LYZL2   | 0.70 | 2.41E-01 | -0.34 | 6.32E-01 | 1.56  | 5.89E-02 |
| AKAP3   | 0.70 | 2.41E-01 | 0.18  | 4.30E-01 | 0.88  | 1.91E-01 |
| SPACA3  | 0.70 | 2.41E-01 | 0.92  | 1.78E-01 | 1.16  | 1.23E-01 |
| VSTM2A  | 0.70 | 2.41E-01 | 0.43  | 3.33E-01 | -0.29 | 6.13E-01 |
| PIGF    | 0.70 | 2.42E-01 | -0.89 | 8.14E-01 | 0.46  | 3.23E-01 |
| SYCE3   | 0.70 | 2.42E-01 | -0.43 | 6.67E-01 | 0.40  | 3.43E-01 |
| 43357   | 0.70 | 2.42E-01 | 1.10  | 1.37E-01 | 0.25  | 4.02E-01 |
| TGM2    | 0.70 | 2.42E-01 | -0.18 | 5.72E-01 | -0.02 | 5.07E-01 |
| PFDN1   | 0.70 | 2.42E-01 | 0.52  | 3.01E-01 | 0.38  | 3.50E-01 |
| TRABD2A | 0.70 | 2.42E-01 | 0.94  | 1.75E-01 | 0.92  | 1.80E-01 |
| CMTM6   | 0.70 | 2.42E-01 | 0.75  | 2.27E-01 | -0.73 | 7.68E-01 |



|          |      |          |       |          |       |          |
|----------|------|----------|-------|----------|-------|----------|
| A1BG     | 0.70 | 2.42E-01 | 2.20  | 1.38E-02 | 0.71  | 2.39E-01 |
| NTN5     | 0.70 | 2.42E-01 | 0.01  | 4.96E-01 | 2.06  | 1.95E-02 |
| ZHX2     | 0.70 | 2.42E-01 | -0.91 | 8.19E-01 | 0.19  | 4.26E-01 |
| ATP6V1E1 | 0.70 | 2.42E-01 | 0.12  | 4.53E-01 | 0.36  | 3.59E-01 |
| C6ORF165 | 0.70 | 2.42E-01 | -0.12 | 5.48E-01 | 1.32  | 9.42E-02 |
| ERMAP    | 0.70 | 2.42E-01 | 1.15  | 1.25E-01 | 0.36  | 3.60E-01 |
| AP5Z1    | 0.70 | 2.42E-01 | 0.15  | 4.39E-01 | 0.70  | 2.42E-01 |
| PRIMPOL  | 0.70 | 2.42E-01 | 0.22  | 4.11E-01 | 0.50  | 3.07E-01 |
| MDFIC    | 0.70 | 2.42E-01 | -1.37 | 9.15E-01 | 2.36  | 9.17E-03 |
| SF3B3    | 0.70 | 2.43E-01 | 1.88  | 2.97E-02 | -0.24 | 5.97E-01 |
| FAM109B  | 0.70 | 2.43E-01 | 0.92  | 1.78E-01 | -0.54 | 7.04E-01 |
| SNX33    | 0.70 | 2.43E-01 | 0.58  | 2.82E-01 | -0.74 | 7.71E-01 |
| HLF      | 0.70 | 2.43E-01 | -0.10 | 5.38E-01 | -0.11 | 5.42E-01 |
| SMC3     | 0.70 | 2.43E-01 | -0.28 | 6.11E-01 | 0.23  | 4.09E-01 |
| DPF3     | 0.70 | 2.43E-01 | -0.42 | 6.63E-01 | -0.22 | 5.87E-01 |
| PP2D1    | 0.70 | 2.43E-01 | 0.15  | 4.39E-01 | 0.72  | 2.36E-01 |
| TSSK3    | 0.70 | 2.43E-01 | 0.49  | 3.11E-01 | 0.18  | 4.28E-01 |
| UCHL3    | 0.70 | 2.43E-01 | 0.08  | 4.66E-01 | -0.05 | 5.21E-01 |
| AKT1     | 0.70 | 2.43E-01 | -1.35 | 9.11E-01 | 1.01  | 1.55E-01 |
| C5orf56  | 0.70 | 2.43E-01 | 0.61  | 2.70E-01 | 1.42  | 7.82E-02 |
| ST8SIA4  | 0.70 | 2.43E-01 | 0.75  | 2.27E-01 | -0.60 | 7.24E-01 |
| RYR3     | 0.70 | 2.43E-01 | -0.82 | 7.92E-01 | -0.32 | 6.27E-01 |
| C4orf32  | 0.70 | 2.43E-01 | -0.60 | 7.25E-01 | 0.48  | 3.15E-01 |
| RAB11A   | 0.70 | 2.43E-01 | 1.20  | 1.14E-01 | -0.74 | 7.70E-01 |
| GAREM    | 0.70 | 2.43E-01 | -0.29 | 6.15E-01 | 1.29  | 9.85E-02 |
| SDE2     | 0.70 | 2.43E-01 | -0.14 | 5.56E-01 | 1.65  | 4.90E-02 |
| FOXP4    | 0.70 | 2.43E-01 | 0.24  | 4.04E-01 | 0.40  | 3.46E-01 |
| TRIM44   | 0.70 | 2.43E-01 | 0.92  | 1.79E-01 | 1.12  | 1.31E-01 |
| DPP3     | 0.70 | 2.43E-01 | 0.92  | 1.79E-01 | -0.71 | 7.60E-01 |
| PDZRN3   | 0.70 | 2.44E-01 | -0.35 | 6.38E-01 | -0.46 | 6.77E-01 |
| SLC25A21 | 0.69 | 2.44E-01 | 0.39  | 3.47E-01 | -0.77 | 7.78E-01 |

|               |      |          |       |          |       |          |
|---------------|------|----------|-------|----------|-------|----------|
| SOX1          | 0.69 | 2.44E-01 | -0.46 | 6.78E-01 | 0.79  | 2.14E-01 |
| SENP6         | 0.69 | 2.44E-01 | -0.08 | 5.32E-01 | 0.95  | 1.71E-01 |
| COL4A1        | 0.69 | 2.44E-01 | -1.40 | 9.20E-01 | 1.64  | 5.06E-02 |
| CFL2          | 0.69 | 2.44E-01 | -0.16 | 5.65E-01 | 0.27  | 3.94E-01 |
| NDST4         | 0.69 | 2.44E-01 | -0.83 | 7.96E-01 | 1.48  | 6.96E-02 |
| HPCA          | 0.69 | 2.44E-01 | 0.76  | 2.22E-01 | 1.80  | 3.59E-02 |
| POU3F3        | 0.69 | 2.44E-01 | 1.46  | 7.16E-02 | -1.66 | 9.52E-01 |
| FAM161A       | 0.69 | 2.44E-01 | -0.05 | 5.21E-01 | 0.16  | 4.36E-01 |
| MCL1          | 0.69 | 2.44E-01 | 0.12  | 4.52E-01 | 0.86  | 1.94E-01 |
| TCTN3         | 0.69 | 2.44E-01 | -0.04 | 5.16E-01 | 0.95  | 1.71E-01 |
| AP2M1         | 0.69 | 2.44E-01 | -0.26 | 6.04E-01 | 0.20  | 4.19E-01 |
| IL1RAP        | 0.69 | 2.44E-01 | -1.03 | 8.48E-01 | 0.15  | 4.42E-01 |
| HDC           | 0.69 | 2.44E-01 | 1.81  | 3.55E-02 | -0.24 | 5.95E-01 |
| PPP6C         | 0.69 | 2.44E-01 | 0.22  | 4.13E-01 | 0.01  | 4.97E-01 |
| ALDH4A1       | 0.69 | 2.44E-01 | -0.42 | 6.64E-01 | 0.47  | 3.18E-01 |
| SIRT3         | 0.69 | 2.44E-01 | 1.28  | 1.00E-01 | -1.34 | 9.10E-01 |
| LRRC1         | 0.69 | 2.44E-01 | 1.23  | 1.09E-01 | -1.30 | 9.02E-01 |
| PAICS         | 0.69 | 2.44E-01 | 0.77  | 2.22E-01 | 0.56  | 2.89E-01 |
| ACRV1         | 0.69 | 2.44E-01 | -0.70 | 7.57E-01 | 0.63  | 2.63E-01 |
| SOX21         | 0.69 | 2.44E-01 | -2.47 | 9.93E-01 | 1.82  | 3.42E-02 |
| PTPRT         | 0.69 | 2.44E-01 | -0.23 | 5.90E-01 | 0.22  | 4.12E-01 |
| CCNL2         | 0.69 | 2.44E-01 | 0.32  | 3.73E-01 | -0.10 | 5.40E-01 |
| GPR32         | 0.69 | 2.44E-01 | 0.25  | 4.00E-01 | 0.36  | 3.60E-01 |
| C8orf4        | 0.69 | 2.45E-01 | 0.49  | 3.11E-01 | -0.51 | 6.94E-01 |
| CXCL9         | 0.69 | 2.45E-01 | -0.16 | 5.62E-01 | 0.09  | 4.65E-01 |
| SMTNL1        | 0.69 | 2.45E-01 | 0.53  | 2.98E-01 | -0.50 | 6.92E-01 |
| NLGN1         | 0.69 | 2.45E-01 | 1.90  | 2.87E-02 | -0.42 | 6.63E-01 |
| CTD-307407.11 | 0.69 | 2.45E-01 | 0.94  | 1.74E-01 | -0.88 | 8.11E-01 |
| NEU2          | 0.69 | 2.45E-01 | -1.58 | 9.43E-01 | 1.25  | 1.06E-01 |
| TBC1D32       | 0.69 | 2.45E-01 | -1.00 | 8.42E-01 | 0.79  | 2.15E-01 |
| BRPF3         | 0.69 | 2.45E-01 | 1.52  | 6.49E-02 | -1.70 | 9.55E-01 |

|           |      |          |       |          |       |          |
|-----------|------|----------|-------|----------|-------|----------|
| ZNF576    | 0.69 | 2.45E-01 | -0.19 | 5.76E-01 | -0.71 | 7.60E-01 |
| HYOU1     | 0.69 | 2.45E-01 | -0.54 | 7.05E-01 | 1.98  | 2.36E-02 |
| CRYZ      | 0.69 | 2.45E-01 | -0.60 | 7.26E-01 | 1.14  | 1.27E-01 |
| TMEM225   | 0.69 | 2.45E-01 | 0.07  | 4.72E-01 | -0.18 | 5.70E-01 |
| OR5111    | 0.69 | 2.45E-01 | -1.27 | 8.99E-01 | 1.33  | 9.15E-02 |
| STK10     | 0.69 | 2.45E-01 | 0.90  | 1.85E-01 | -0.43 | 6.66E-01 |
| C10orf118 | 0.69 | 2.45E-01 | 0.54  | 2.96E-01 | 0.25  | 4.02E-01 |
| MED6      | 0.69 | 2.45E-01 | 2.36  | 9.03E-03 | -0.37 | 6.44E-01 |
| PPM1J     | 0.69 | 2.45E-01 | 1.22  | 1.11E-01 | 0.08  | 4.69E-01 |
| PANX1     | 0.69 | 2.45E-01 | 1.09  | 1.38E-01 | -1.43 | 9.23E-01 |
| SSH3      | 0.69 | 2.45E-01 | 2.19  | 1.44E-02 | -0.74 | 7.69E-01 |
| PAOX      | 0.69 | 2.45E-01 | -0.50 | 6.91E-01 | 2.57  | 5.09E-03 |
| C16orf58  | 0.69 | 2.45E-01 | 0.06  | 4.78E-01 | -0.18 | 5.69E-01 |
| C18orf64  | 0.69 | 2.45E-01 | 1.43  | 7.57E-02 | -0.32 | 6.24E-01 |
| LYPD6B    | 0.69 | 2.46E-01 | 0.73  | 2.33E-01 | 0.38  | 3.52E-01 |
| EPHA10    | 0.69 | 2.46E-01 | 0.06  | 4.77E-01 | 2.55  | 5.41E-03 |
| MS4A10    | 0.69 | 2.46E-01 | 1.09  | 1.39E-01 | -1.16 | 8.78E-01 |
| ATG10     | 0.69 | 2.46E-01 | -0.05 | 5.18E-01 | 1.40  | 8.09E-02 |
| EP400     | 0.69 | 2.46E-01 | 0.26  | 3.99E-01 | 0.35  | 3.64E-01 |
| STX3      | 0.69 | 2.46E-01 | 1.00  | 1.59E-01 | -0.67 | 7.48E-01 |
| CUL5      | 0.69 | 2.46E-01 | 0.61  | 2.71E-01 | -0.17 | 5.66E-01 |
| SNX8      | 0.69 | 2.46E-01 | -0.73 | 7.68E-01 | 2.28  | 1.14E-02 |
| IFI6      | 0.69 | 2.46E-01 | -1.54 | 9.38E-01 | 1.30  | 9.66E-02 |
| CCDC42    | 0.69 | 2.46E-01 | -0.64 | 7.40E-01 | 0.30  | 3.81E-01 |
| BMP10     | 0.69 | 2.46E-01 | 0.36  | 3.61E-01 | -0.31 | 6.22E-01 |
| SOX6      | 0.69 | 2.46E-01 | 1.77  | 3.82E-02 | -1.18 | 8.81E-01 |
| PROCA1    | 0.69 | 2.46E-01 | -0.52 | 6.99E-01 | 0.87  | 1.92E-01 |
| NDNF      | 0.69 | 2.46E-01 | 1.75  | 4.00E-02 | -1.24 | 8.93E-01 |
| LRRC4     | 0.69 | 2.46E-01 | 1.82  | 3.46E-02 | -1.44 | 9.25E-01 |
| CYR61     | 0.69 | 2.46E-01 | 1.17  | 1.20E-01 | -0.06 | 5.24E-01 |
| PI4K2A    | 0.69 | 2.47E-01 | -0.50 | 6.92E-01 | 0.70  | 2.42E-01 |

|          |      |          |       |          |       |          |
|----------|------|----------|-------|----------|-------|----------|
| PSEN2    | 0.69 | 2.47E-01 | 0.67  | 2.51E-01 | -0.89 | 8.12E-01 |
| NRP2     | 0.69 | 2.47E-01 | 0.29  | 3.85E-01 | 0.31  | 3.79E-01 |
| TRAPPC6B | 0.69 | 2.47E-01 | -0.36 | 6.40E-01 | 1.76  | 3.89E-02 |
| MRC1L1   | 0.68 | 2.47E-01 | -1.68 | 9.53E-01 | 1.36  | 8.77E-02 |
| YRDC     | 0.68 | 2.47E-01 | -0.18 | 5.71E-01 | 1.56  | 5.98E-02 |
| P2RY14   | 0.68 | 2.47E-01 | 1.08  | 1.41E-01 | -1.42 | 9.22E-01 |
| LEMD3    | 0.68 | 2.47E-01 | 0.27  | 3.93E-01 | 0.37  | 3.57E-01 |
| GRIN1    | 0.68 | 2.47E-01 | -0.42 | 6.62E-01 | 1.96  | 2.49E-02 |
| COL14A1  | 0.68 | 2.47E-01 | -0.66 | 7.44E-01 | 0.25  | 4.01E-01 |
| RPS27L   | 0.68 | 2.47E-01 | -0.17 | 5.67E-01 | 0.53  | 2.99E-01 |
| BZRAP1   | 0.68 | 2.47E-01 | -1.09 | 8.62E-01 | 1.13  | 1.29E-01 |
| MUSK     | 0.68 | 2.47E-01 | 1.33  | 9.25E-02 | -1.15 | 8.75E-01 |
| NDUFS6   | 0.68 | 2.47E-01 | 0.09  | 4.62E-01 | -0.35 | 6.38E-01 |
| ECSIT    | 0.68 | 2.47E-01 | -0.80 | 7.88E-01 | 0.80  | 2.12E-01 |
| PNPLA5   | 0.68 | 2.47E-01 | 1.83  | 3.38E-02 | -0.73 | 7.68E-01 |
| PTCH2    | 0.68 | 2.47E-01 | 1.74  | 4.05E-02 | -0.43 | 6.65E-01 |
| GRM5     | 0.68 | 2.47E-01 | 0.10  | 4.60E-01 | 0.25  | 4.02E-01 |
| HTR2A    | 0.68 | 2.47E-01 | 0.52  | 3.02E-01 | -0.87 | 8.08E-01 |
| SLC25A26 | 0.68 | 2.47E-01 | 0.02  | 4.90E-01 | 1.11  | 1.33E-01 |
| PRND     | 0.68 | 2.47E-01 | 0.71  | 2.40E-01 | -1.13 | 8.71E-01 |
| MRPS11   | 0.68 | 2.48E-01 | -0.87 | 8.07E-01 | 0.91  | 1.82E-01 |
| SPRN     | 0.68 | 2.48E-01 | 1.45  | 7.36E-02 | -0.63 | 7.35E-01 |
| ARHGAP17 | 0.68 | 2.48E-01 | 1.05  | 1.48E-01 | -0.06 | 5.24E-01 |
| HOXA13   | 0.68 | 2.48E-01 | 1.12  | 1.31E-01 | -0.69 | 7.56E-01 |
| CIZ1     | 0.68 | 2.48E-01 | 0.18  | 4.28E-01 | -0.12 | 5.49E-01 |
| USP4     | 0.68 | 2.48E-01 | -1.28 | 9.00E-01 | 1.67  | 4.73E-02 |
| DEFB123  | 0.68 | 2.48E-01 | 2.19  | 1.41E-02 | -0.21 | 5.82E-01 |
| ZNF396   | 0.68 | 2.48E-01 | -1.34 | 9.09E-01 | 2.04  | 2.08E-02 |
| LDLR     | 0.68 | 2.48E-01 | 0.79  | 2.15E-01 | 0.95  | 1.72E-01 |
| TKTL2    | 0.68 | 2.48E-01 | -0.45 | 6.74E-01 | 2.41  | 7.89E-03 |
| STX1A    | 0.68 | 2.48E-01 | 0.44  | 3.30E-01 | 0.40  | 3.44E-01 |

|          |      |          |       |          |       |          |
|----------|------|----------|-------|----------|-------|----------|
| LCN15    | 0.68 | 2.48E-01 | 1.00  | 1.58E-01 | 0.41  | 3.40E-01 |
| FBXO44   | 0.68 | 2.48E-01 | 0.06  | 4.76E-01 | 0.18  | 4.30E-01 |
| WDR34    | 0.68 | 2.48E-01 | 0.11  | 4.55E-01 | 0.04  | 4.83E-01 |
| NDST2    | 0.68 | 2.48E-01 | 0.24  | 4.06E-01 | -0.32 | 6.25E-01 |
| MITD1    | 0.68 | 2.48E-01 | -0.25 | 5.97E-01 | 0.89  | 1.87E-01 |
| SMG6     | 0.68 | 2.48E-01 | -0.36 | 6.41E-01 | 1.20  | 1.15E-01 |
| PNMA2    | 0.68 | 2.48E-01 | 0.47  | 3.20E-01 | 0.00  | 5.01E-01 |
| FAM187A  | 0.68 | 2.49E-01 | 1.64  | 5.08E-02 | -0.68 | 7.52E-01 |
| ZDHHHC7  | 0.68 | 2.49E-01 | 0.16  | 4.37E-01 | 0.18  | 4.28E-01 |
| MRPL1    | 0.68 | 2.49E-01 | 0.70  | 2.42E-01 | -0.80 | 7.87E-01 |
| ESAM     | 0.68 | 2.49E-01 | 0.10  | 4.59E-01 | 1.13  | 1.30E-01 |
| ZKSCAN1  | 0.68 | 2.49E-01 | 0.21  | 4.17E-01 | 1.50  | 6.72E-02 |
| KIAA0930 | 0.68 | 2.49E-01 | 1.07  | 1.42E-01 | -1.11 | 8.66E-01 |
| PHF1     | 0.68 | 2.49E-01 | 1.14  | 1.27E-01 | -0.82 | 7.95E-01 |
| TUBB2A   | 0.68 | 2.49E-01 | -1.24 | 8.93E-01 | 1.13  | 1.30E-01 |
| C8orf86  | 0.68 | 2.49E-01 | -0.43 | 6.65E-01 | 0.21  | 4.16E-01 |
| HADHB    | 0.68 | 2.49E-01 | 2.33  | 1.00E-02 | 0.58  | 2.82E-01 |
| RNF152   | 0.68 | 2.49E-01 | 1.35  | 8.92E-02 | -0.64 | 7.39E-01 |
| SLC16A3  | 0.68 | 2.49E-01 | -0.25 | 5.99E-01 | 0.33  | 3.69E-01 |
| NCOA1    | 0.68 | 2.49E-01 | 0.96  | 1.69E-01 | 1.22  | 1.10E-01 |
| RBM43    | 0.68 | 2.50E-01 | -0.40 | 6.56E-01 | 1.71  | 4.34E-02 |
| DUSP6    | 0.68 | 2.50E-01 | 0.90  | 1.83E-01 | -1.06 | 8.55E-01 |
| DHX38    | 0.67 | 2.50E-01 | 0.13  | 4.48E-01 | 1.00  | 1.58E-01 |
| SNX31    | 0.67 | 2.50E-01 | -0.64 | 7.39E-01 | 1.38  | 8.45E-02 |
| RPL13A   | 0.67 | 2.50E-01 | -0.25 | 5.99E-01 | 0.71  | 2.40E-01 |
| FUBP3    | 0.67 | 2.50E-01 | 0.82  | 2.07E-01 | 0.32  | 3.73E-01 |
| FAAH     | 0.67 | 2.50E-01 | 0.42  | 3.39E-01 | 1.84  | 3.26E-02 |
| ZNF597   | 0.67 | 2.50E-01 | -0.43 | 6.67E-01 | 0.83  | 2.04E-01 |
| KCTD3    | 0.67 | 2.50E-01 | 0.75  | 2.28E-01 | -1.19 | 8.82E-01 |
| BTLA     | 0.67 | 2.50E-01 | 0.62  | 2.66E-01 | -0.63 | 7.36E-01 |
| ZSCAN23  | 0.67 | 2.50E-01 | -0.03 | 5.13E-01 | 1.17  | 1.20E-01 |

|            |      |          |       |          |       |          |
|------------|------|----------|-------|----------|-------|----------|
| POMZP3     | 0.67 | 2.50E-01 | 0.91  | 1.80E-01 | -0.46 | 6.77E-01 |
| F7         | 0.67 | 2.50E-01 | -0.22 | 5.86E-01 | 0.31  | 3.77E-01 |
| CMTM3      | 0.67 | 2.51E-01 | -1.39 | 9.18E-01 | 1.84  | 3.32E-02 |
| PHF11      | 0.67 | 2.51E-01 | 0.30  | 3.82E-01 | 0.68  | 2.49E-01 |
| PCSK1      | 0.67 | 2.51E-01 | -0.25 | 5.99E-01 | 0.52  | 3.02E-01 |
| GPR132     | 0.67 | 2.51E-01 | -0.15 | 5.59E-01 | 1.15  | 1.25E-01 |
| SIGIRR     | 0.67 | 2.51E-01 | 0.55  | 2.92E-01 | 0.74  | 2.29E-01 |
| OR7D2      | 0.67 | 2.51E-01 | 0.73  | 2.34E-01 | 0.15  | 4.41E-01 |
| SNX15      | 0.67 | 2.51E-01 | 1.33  | 9.11E-02 | -0.33 | 6.28E-01 |
| WDR26      | 0.67 | 2.51E-01 | 0.53  | 3.00E-01 | -0.15 | 5.61E-01 |
| SLC6A5     | 0.67 | 2.51E-01 | 0.27  | 3.95E-01 | 0.17  | 4.33E-01 |
| DAPK3      | 0.67 | 2.51E-01 | 0.24  | 4.04E-01 | 1.41  | 7.91E-02 |
| CDK5R2     | 0.67 | 2.51E-01 | 1.93  | 2.70E-02 | 0.49  | 3.13E-01 |
| ZNF438     | 0.67 | 2.51E-01 | 0.66  | 2.55E-01 | 0.16  | 4.35E-01 |
| GALNT11    | 0.67 | 2.51E-01 | 1.35  | 8.89E-02 | -1.21 | 8.88E-01 |
| DDRGK1     | 0.67 | 2.51E-01 | -1.22 | 8.88E-01 | 0.69  | 2.44E-01 |
| ST7        | 0.67 | 2.51E-01 | 2.00  | 2.27E-02 | -1.03 | 8.48E-01 |
| IL34       | 0.67 | 2.51E-01 | 1.28  | 1.00E-01 | -0.54 | 7.06E-01 |
| GPR75-ASB3 | 0.67 | 2.51E-01 | 1.43  | 7.64E-02 | -1.50 | 9.33E-01 |
| GPRIN1     | 0.67 | 2.51E-01 | 1.08  | 1.40E-01 | -0.27 | 6.05E-01 |
| FAIM3      | 0.67 | 2.51E-01 | 1.20  | 1.14E-01 | -0.16 | 5.64E-01 |
| ATP2B2     | 0.67 | 2.51E-01 | 0.39  | 3.49E-01 | 0.39  | 3.47E-01 |
| NECAB3     | 0.67 | 2.51E-01 | 1.04  | 1.50E-01 | -0.75 | 7.74E-01 |
| SLC11A2    | 0.67 | 2.51E-01 | 0.93  | 1.76E-01 | 0.18  | 4.29E-01 |
| PODXL2     | 0.67 | 2.52E-01 | 0.03  | 4.87E-01 | -0.34 | 6.34E-01 |
| EMR2       | 0.67 | 2.52E-01 | -0.39 | 6.52E-01 | 1.13  | 1.29E-01 |
| SLC2A14    | 0.67 | 2.52E-01 | 1.95  | 2.55E-02 | -0.90 | 8.15E-01 |
| PRPF39     | 0.67 | 2.52E-01 | 0.84  | 2.02E-01 | 0.11  | 4.55E-01 |
| GALNT8     | 0.67 | 2.52E-01 | 0.58  | 2.82E-01 | 0.32  | 3.76E-01 |
| DZIP3      | 0.67 | 2.52E-01 | 0.24  | 4.06E-01 | -0.06 | 5.24E-01 |
| TMPRSS11B  | 0.67 | 2.52E-01 | -0.39 | 6.52E-01 | 0.48  | 3.16E-01 |

|          |      |          |       |          |       |          |
|----------|------|----------|-------|----------|-------|----------|
| STK4     | 0.67 | 2.52E-01 | 0.00  | 4.99E-01 | -0.17 | 5.69E-01 |
| MUC4     | 0.67 | 2.52E-01 | 0.10  | 4.61E-01 | -0.20 | 5.78E-01 |
| CEBPB    | 0.67 | 2.52E-01 | 0.63  | 2.64E-01 | -0.60 | 7.26E-01 |
| HEMK1    | 0.67 | 2.52E-01 | 0.83  | 2.03E-01 | -0.88 | 8.10E-01 |
| DAND5    | 0.67 | 2.52E-01 | -0.04 | 5.16E-01 | 1.81  | 3.50E-02 |
| RASL11B  | 0.67 | 2.52E-01 | 1.14  | 1.28E-01 | -1.30 | 9.04E-01 |
| PTK6     | 0.67 | 2.52E-01 | 0.67  | 2.52E-01 | 1.57  | 5.86E-02 |
| STC1     | 0.67 | 2.52E-01 | -0.72 | 7.63E-01 | 1.32  | 9.40E-02 |
| RABAC1   | 0.67 | 2.52E-01 | 0.43  | 3.35E-01 | 1.50  | 6.65E-02 |
| P2RY1    | 0.67 | 2.53E-01 | 0.25  | 4.00E-01 | 0.44  | 3.31E-01 |
| RBMS3    | 0.67 | 2.53E-01 | -0.26 | 6.03E-01 | 1.26  | 1.03E-01 |
| C19orf44 | 0.67 | 2.53E-01 | -0.39 | 6.53E-01 | -0.05 | 5.21E-01 |
| CD2BP2   | 0.67 | 2.53E-01 | 0.62  | 2.67E-01 | -1.04 | 8.51E-01 |
| PDE4C    | 0.67 | 2.53E-01 | 1.17  | 1.21E-01 | -0.25 | 5.97E-01 |
| MTMR2    | 0.67 | 2.53E-01 | 0.20  | 4.22E-01 | 1.57  | 5.83E-02 |
| COL4A3BP | 0.66 | 2.53E-01 | 0.06  | 4.76E-01 | 1.18  | 1.18E-01 |
| PRICKLE1 | 0.66 | 2.53E-01 | 2.45  | 7.23E-03 | 0.23  | 4.08E-01 |
| SPTBN1   | 0.66 | 2.53E-01 | 0.87  | 1.92E-01 | -0.14 | 5.54E-01 |
| SUV420H2 | 0.66 | 2.53E-01 | 0.20  | 4.22E-01 | -0.58 | 7.20E-01 |
| CDK15    | 0.66 | 2.53E-01 | 0.38  | 3.51E-01 | -0.67 | 7.48E-01 |
| SPRY4    | 0.66 | 2.53E-01 | -0.09 | 5.36E-01 | 0.61  | 2.72E-01 |
| IER2     | 0.66 | 2.53E-01 | 2.53  | 5.66E-03 | 0.62  | 2.67E-01 |
| POLK     | 0.66 | 2.53E-01 | 0.31  | 3.79E-01 | 0.99  | 1.62E-01 |
| GPR88    | 0.66 | 2.53E-01 | 0.47  | 3.17E-01 | 0.60  | 2.73E-01 |
| NACC2    | 0.66 | 2.54E-01 | -0.41 | 6.58E-01 | 1.57  | 5.80E-02 |
| MCM7     | 0.66 | 2.54E-01 | -0.27 | 6.05E-01 | 0.69  | 2.45E-01 |
| RARS     | 0.66 | 2.54E-01 | -0.06 | 5.25E-01 | 0.16  | 4.37E-01 |
| SLMO2    | 0.66 | 2.54E-01 | -0.27 | 6.08E-01 | 0.53  | 2.98E-01 |
| NXNL2    | 0.66 | 2.54E-01 | 0.18  | 4.30E-01 | 0.19  | 4.25E-01 |
| ETV3L    | 0.66 | 2.54E-01 | 0.35  | 3.63E-01 | -1.09 | 8.62E-01 |
| RAB8A    | 0.66 | 2.54E-01 | 0.23  | 4.10E-01 | 0.50  | 3.10E-01 |

|                 |      |          |       |          |       |          |
|-----------------|------|----------|-------|----------|-------|----------|
| NCKAP1L         | 0.66 | 2.54E-01 | 0.93  | 1.77E-01 | 0.49  | 3.12E-01 |
| COMMD6          | 0.66 | 2.54E-01 | 0.20  | 4.19E-01 | -0.22 | 5.89E-01 |
| TTF1            | 0.66 | 2.54E-01 | 0.70  | 2.43E-01 | -0.54 | 7.07E-01 |
| LGR5            | 0.66 | 2.54E-01 | -1.14 | 8.73E-01 | 1.02  | 1.54E-01 |
| SBSN            | 0.66 | 2.54E-01 | 0.63  | 2.64E-01 | -0.32 | 6.25E-01 |
| CLVS2           | 0.66 | 2.54E-01 | -0.17 | 5.68E-01 | 0.38  | 3.51E-01 |
| PRADC1          | 0.66 | 2.54E-01 | 0.40  | 3.45E-01 | -0.03 | 5.12E-01 |
| GLG1            | 0.66 | 2.54E-01 | 1.42  | 7.72E-02 | -1.53 | 9.37E-01 |
| APOL2           | 0.66 | 2.54E-01 | 0.82  | 2.07E-01 | 0.42  | 3.37E-01 |
| IYD             | 0.66 | 2.55E-01 | 0.85  | 1.96E-01 | 1.38  | 8.35E-02 |
| LL22NC03-63E9.3 | 0.66 | 2.55E-01 | -0.16 | 5.62E-01 | 0.40  | 3.44E-01 |
| FKTN            | 0.66 | 2.55E-01 | 0.85  | 1.97E-01 | -0.38 | 6.49E-01 |
| MTNR1B          | 0.66 | 2.55E-01 | -2.41 | 9.92E-01 | 1.44  | 7.48E-02 |
| SH2B2           | 0.66 | 2.55E-01 | -0.34 | 6.34E-01 | 1.39  | 8.17E-02 |
| GYLTL1B         | 0.66 | 2.55E-01 | 0.67  | 2.53E-01 | 2.88  | 1.98E-03 |
| KCNRG           | 0.66 | 2.55E-01 | -0.74 | 7.71E-01 | 2.14  | 1.61E-02 |
| BCL2L12         | 0.66 | 2.55E-01 | -0.88 | 8.12E-01 | 0.89  | 1.86E-01 |
| SLC7A7          | 0.66 | 2.55E-01 | 0.50  | 3.07E-01 | 0.36  | 3.59E-01 |
| LRRC41          | 0.66 | 2.55E-01 | 0.64  | 2.63E-01 | 1.04  | 1.50E-01 |
| CCNG1           | 0.66 | 2.56E-01 | 0.21  | 4.16E-01 | 0.09  | 4.64E-01 |
| SERPIND1        | 0.66 | 2.56E-01 | -0.82 | 7.94E-01 | 1.62  | 5.21E-02 |
| CWF19L2         | 0.66 | 2.56E-01 | 1.08  | 1.40E-01 | -1.10 | 8.65E-01 |
| LMO3            | 0.66 | 2.56E-01 | -0.95 | 8.29E-01 | 0.58  | 2.82E-01 |
| CDK7            | 0.66 | 2.56E-01 | -0.74 | 7.70E-01 | 0.92  | 1.78E-01 |
| ITGB1           | 0.66 | 2.56E-01 | 0.54  | 2.95E-01 | 0.62  | 2.67E-01 |
| TMEM213         | 0.66 | 2.56E-01 | -0.09 | 5.37E-01 | 0.88  | 1.89E-01 |
| ZNF568          | 0.66 | 2.56E-01 | 0.12  | 4.52E-01 | 1.37  | 8.59E-02 |
| ZNF696          | 0.66 | 2.56E-01 | -0.75 | 7.72E-01 | 1.40  | 8.15E-02 |
| CD86            | 0.66 | 2.56E-01 | 0.34  | 3.69E-01 | -0.81 | 7.90E-01 |
| NADK            | 0.66 | 2.56E-01 | 0.62  | 2.68E-01 | 0.85  | 1.99E-01 |
| STRC            | 0.66 | 2.56E-01 | 1.44  | 7.51E-02 | -0.71 | 7.61E-01 |



|            |      |          |       |          |       |          |
|------------|------|----------|-------|----------|-------|----------|
| POMT2      | 0.66 | 2.56E-01 | -0.32 | 6.24E-01 | -0.68 | 7.51E-01 |
| SSBP3      | 0.66 | 2.56E-01 | 1.00  | 1.60E-01 | -1.00 | 8.42E-01 |
| AC008271.1 | 0.66 | 2.56E-01 | 0.41  | 3.42E-01 | 0.50  | 3.10E-01 |
| CSF1R      | 0.66 | 2.56E-01 | -0.71 | 7.61E-01 | 0.29  | 3.86E-01 |
| INSRR      | 0.66 | 2.56E-01 | 1.35  | 8.79E-02 | -1.15 | 8.75E-01 |
| KIAA1430   | 0.66 | 2.56E-01 | 0.94  | 1.75E-01 | -1.16 | 8.77E-01 |
| DIXDC1     | 0.65 | 2.56E-01 | 1.24  | 1.08E-01 | -0.56 | 7.12E-01 |
| ATP6V0D2   | 0.65 | 2.56E-01 | -0.37 | 6.46E-01 | -0.30 | 6.17E-01 |
| NAA20      | 0.65 | 2.56E-01 | 0.89  | 1.88E-01 | -0.96 | 8.31E-01 |
| KIAA0040   | 0.65 | 2.56E-01 | 1.78  | 3.73E-02 | -0.57 | 7.16E-01 |
| LGALS8     | 0.65 | 2.56E-01 | -0.50 | 6.90E-01 | 1.08  | 1.41E-01 |
| TPGS1      | 0.65 | 2.56E-01 | 0.01  | 4.98E-01 | 0.07  | 4.70E-01 |
| GTF3C6     | 0.65 | 2.57E-01 | 0.95  | 1.72E-01 | -0.47 | 6.82E-01 |
| C19orf10   | 0.65 | 2.57E-01 | 0.52  | 3.00E-01 | -0.42 | 6.62E-01 |
| C15orf60   | 0.65 | 2.57E-01 | -0.45 | 6.74E-01 | 0.51  | 3.05E-01 |
| NBPF3      | 0.65 | 2.57E-01 | -0.15 | 5.60E-01 | -0.01 | 5.03E-01 |
| TOX        | 0.65 | 2.57E-01 | 0.79  | 2.14E-01 | -1.10 | 8.64E-01 |
| ZFP1       | 0.65 | 2.57E-01 | 0.26  | 3.99E-01 | -0.04 | 5.17E-01 |
| SERINC4    | 0.65 | 2.57E-01 | 1.07  | 1.43E-01 | -0.73 | 7.69E-01 |
| ATP6V0D1   | 0.65 | 2.57E-01 | -2.02 | 9.78E-01 | 1.64  | 5.09E-02 |
| KLK1       | 0.65 | 2.57E-01 | 0.10  | 4.61E-01 | 0.65  | 2.59E-01 |
| C3orf83    | 0.65 | 2.57E-01 | -0.09 | 5.35E-01 | 0.55  | 2.91E-01 |
| GLIPR2     | 0.65 | 2.57E-01 | -0.99 | 8.39E-01 | 2.36  | 9.21E-03 |
| DLAT       | 0.65 | 2.57E-01 | 1.38  | 8.32E-02 | -0.91 | 8.20E-01 |
| CEP89      | 0.65 | 2.57E-01 | 0.88  | 1.89E-01 | -0.73 | 7.66E-01 |
| MYL12A     | 0.65 | 2.58E-01 | -0.27 | 6.08E-01 | 0.90  | 1.83E-01 |
| IFNB1      | 0.65 | 2.58E-01 | 0.31  | 3.77E-01 | 0.03  | 4.87E-01 |
| GTF2E2     | 0.65 | 2.58E-01 | 0.46  | 3.23E-01 | -0.21 | 5.84E-01 |
| KBTBD6     | 0.65 | 2.58E-01 | 0.91  | 1.82E-01 | 0.77  | 2.22E-01 |
| CSRP2BP    | 0.65 | 2.58E-01 | 0.15  | 4.41E-01 | 0.24  | 4.06E-01 |
| SBNO1      | 0.65 | 2.58E-01 | 0.68  | 2.48E-01 | 0.47  | 3.20E-01 |

|             |      |          |       |          |       |          |
|-------------|------|----------|-------|----------|-------|----------|
| SMCO4       | 0.65 | 2.58E-01 | -0.27 | 6.06E-01 | 1.45  | 7.36E-02 |
| BLNK        | 0.65 | 2.58E-01 | -0.34 | 6.33E-01 | 0.45  | 3.27E-01 |
| PITX3       | 0.65 | 2.58E-01 | 0.23  | 4.08E-01 | 0.75  | 2.28E-01 |
| ZFAND1      | 0.65 | 2.58E-01 | 1.20  | 1.16E-01 | 0.57  | 2.86E-01 |
| DLEU2L      | 0.65 | 2.58E-01 | 0.56  | 2.88E-01 | -0.76 | 7.77E-01 |
| TAF2        | 0.65 | 2.58E-01 | -0.07 | 5.28E-01 | 0.01  | 4.94E-01 |
| CD55        | 0.65 | 2.58E-01 | 1.55  | 6.11E-02 | -0.76 | 7.77E-01 |
| PSG11       | 0.65 | 2.58E-01 | -0.94 | 8.26E-01 | 0.92  | 1.78E-01 |
| PPP1R12C    | 0.65 | 2.58E-01 | -0.02 | 5.09E-01 | 2.65  | 4.04E-03 |
| AP1M2       | 0.65 | 2.58E-01 | -0.20 | 5.81E-01 | -0.04 | 5.14E-01 |
| MRPS36      | 0.65 | 2.58E-01 | -0.38 | 6.50E-01 | 1.03  | 1.51E-01 |
| CPEB2       | 0.65 | 2.59E-01 | 1.45  | 7.31E-02 | -0.16 | 5.62E-01 |
| DENND4A     | 0.65 | 2.59E-01 | 1.20  | 1.15E-01 | -0.64 | 7.40E-01 |
| NUMA1       | 0.65 | 2.59E-01 | 0.67  | 2.52E-01 | -0.18 | 5.71E-01 |
| PLCL1       | 0.65 | 2.59E-01 | -0.69 | 7.54E-01 | -0.28 | 6.09E-01 |
| EPPIN-WFDC6 | 0.65 | 2.59E-01 | 0.18  | 4.30E-01 | -0.45 | 6.73E-01 |
| ACBD3       | 0.65 | 2.59E-01 | -1.51 | 9.35E-01 | 1.57  | 5.87E-02 |
| XYLT1       | 0.65 | 2.59E-01 | 0.78  | 2.19E-01 | -0.24 | 5.95E-01 |
| CDC25A      | 0.65 | 2.59E-01 | 1.77  | 3.85E-02 | -0.60 | 7.26E-01 |
| HOXC6       | 0.65 | 2.59E-01 | -0.85 | 8.01E-01 | 0.98  | 1.65E-01 |
| TFR2        | 0.64 | 2.59E-01 | 0.08  | 4.67E-01 | 0.03  | 4.88E-01 |
| ITGA5       | 0.64 | 2.60E-01 | -0.62 | 7.32E-01 | 1.63  | 5.14E-02 |
| SAE1        | 0.64 | 2.60E-01 | 0.29  | 3.86E-01 | -0.34 | 6.32E-01 |
| USP34       | 0.64 | 2.60E-01 | 0.35  | 3.62E-01 | -0.25 | 5.99E-01 |
| ASTE1       | 0.64 | 2.60E-01 | 1.66  | 4.87E-02 | -0.82 | 7.93E-01 |
| SLC12A6     | 0.64 | 2.60E-01 | 0.63  | 2.64E-01 | -0.38 | 6.48E-01 |
| HIST1H2BK   | 0.64 | 2.60E-01 | 0.54  | 2.94E-01 | 1.45  | 7.34E-02 |
| FZD10       | 0.64 | 2.60E-01 | 0.06  | 4.74E-01 | 0.56  | 2.88E-01 |
| KCNMB1      | 0.64 | 2.60E-01 | 1.06  | 1.44E-01 | 0.01  | 4.97E-01 |
| SERHL2      | 0.64 | 2.60E-01 | 0.72  | 2.34E-01 | 0.19  | 4.23E-01 |
| C3orf56     | 0.64 | 2.60E-01 | 0.97  | 1.65E-01 | 0.75  | 2.27E-01 |

|          |      |          |       |          |       |          |
|----------|------|----------|-------|----------|-------|----------|
| OCSTAMP  | 0.64 | 2.60E-01 | -0.60 | 7.24E-01 | 0.98  | 1.63E-01 |
| RSPH9    | 0.64 | 2.60E-01 | 0.62  | 2.68E-01 | -1.29 | 9.01E-01 |
| BET1L    | 0.64 | 2.60E-01 | 0.41  | 3.42E-01 | -0.37 | 6.43E-01 |
| ETV2     | 0.64 | 2.60E-01 | 0.95  | 1.72E-01 | 0.43  | 3.34E-01 |
| LYPD2    | 0.64 | 2.60E-01 | 0.25  | 4.01E-01 | -0.04 | 5.17E-01 |
| CORO7    | 0.64 | 2.60E-01 | 0.61  | 2.72E-01 | 0.42  | 3.36E-01 |
| SLC37A2  | 0.64 | 2.61E-01 | 0.20  | 4.22E-01 | -0.63 | 7.34E-01 |
| PHTF2    | 0.64 | 2.61E-01 | 0.06  | 4.77E-01 | 1.01  | 1.57E-01 |
| GMPS     | 0.64 | 2.61E-01 | 0.46  | 3.22E-01 | 0.21  | 4.16E-01 |
| XPOT     | 0.64 | 2.61E-01 | -0.34 | 6.33E-01 | 0.08  | 4.66E-01 |
| SPTLC3   | 0.64 | 2.61E-01 | -0.41 | 6.59E-01 | 0.54  | 2.96E-01 |
| BOD1     | 0.64 | 2.61E-01 | 0.02  | 4.91E-01 | 0.45  | 3.27E-01 |
| PI4K2A   | 0.64 | 2.61E-01 | -0.54 | 7.06E-01 | 0.71  | 2.40E-01 |
| ZNF473   | 0.64 | 2.61E-01 | -1.41 | 9.20E-01 | 2.31  | 1.05E-02 |
| GTDC1    | 0.64 | 2.61E-01 | 0.85  | 1.97E-01 | 0.38  | 3.52E-01 |
| PROC     | 0.64 | 2.61E-01 | -1.32 | 9.07E-01 | 1.46  | 7.18E-02 |
| NUP98    | 0.64 | 2.61E-01 | 0.43  | 3.32E-01 | 0.54  | 2.94E-01 |
| PLA1A    | 0.64 | 2.61E-01 | 0.69  | 2.46E-01 | 0.28  | 3.90E-01 |
| C12orf75 | 0.64 | 2.61E-01 | 1.10  | 1.35E-01 | -0.74 | 7.70E-01 |
| MAPK11   | 0.64 | 2.61E-01 | 0.68  | 2.47E-01 | 0.18  | 4.30E-01 |
| PRKCH    | 0.64 | 2.61E-01 | 1.71  | 4.39E-02 | 1.59  | 5.57E-02 |
| ARAP2    | 0.64 | 2.62E-01 | 0.50  | 3.07E-01 | 1.52  | 6.45E-02 |
| EBF4     | 0.64 | 2.62E-01 | -0.04 | 5.14E-01 | 0.36  | 3.58E-01 |
| C10orf91 | 0.64 | 2.62E-01 | 0.08  | 4.69E-01 | 0.15  | 4.40E-01 |
| ZNF282   | 0.64 | 2.62E-01 | 0.11  | 4.57E-01 | 1.59  | 5.54E-02 |
| LRRC9    | 0.64 | 2.62E-01 | 0.40  | 3.43E-01 | 0.43  | 3.32E-01 |
| PUF60    | 0.64 | 2.62E-01 | 0.60  | 2.75E-01 | -0.41 | 6.60E-01 |
| GPR107   | 0.64 | 2.62E-01 | 0.63  | 2.65E-01 | -0.26 | 6.04E-01 |
| BEND4    | 0.64 | 2.62E-01 | -0.07 | 5.29E-01 | 0.84  | 2.02E-01 |
| TMX2     | 0.64 | 2.62E-01 | 1.24  | 1.08E-01 | -0.05 | 5.21E-01 |
| PAFAH1B3 | 0.64 | 2.62E-01 | -0.16 | 5.62E-01 | 0.75  | 2.27E-01 |

|          |      |          |       |          |       |          |
|----------|------|----------|-------|----------|-------|----------|
| C1orf222 | 0.64 | 2.62E-01 | 0.54  | 2.93E-01 | 1.61  | 5.42E-02 |
| CSRNP2   | 0.64 | 2.62E-01 | 1.89  | 2.96E-02 | 0.16  | 4.37E-01 |
| LAMB3    | 0.64 | 2.62E-01 | 0.12  | 4.54E-01 | 0.01  | 4.98E-01 |
| ODF3L2   | 0.64 | 2.62E-01 | -0.44 | 6.69E-01 | 1.49  | 6.85E-02 |
| PCNT     | 0.64 | 2.62E-01 | -1.66 | 9.51E-01 | 2.59  | 4.83E-03 |
| ZGPAT    | 0.64 | 2.62E-01 | 0.76  | 2.24E-01 | 0.72  | 2.36E-01 |
| CDK14    | 0.64 | 2.62E-01 | 0.09  | 4.62E-01 | 0.93  | 1.76E-01 |
| GJA3     | 0.64 | 2.62E-01 | 0.36  | 3.58E-01 | 1.44  | 7.55E-02 |
| PCYOX1   | 0.64 | 2.63E-01 | 0.53  | 2.99E-01 | -0.17 | 5.66E-01 |
| PPAPDC1B | 0.64 | 2.63E-01 | -0.23 | 5.91E-01 | 2.17  | 1.52E-02 |
| BIK      | 0.64 | 2.63E-01 | 1.06  | 1.45E-01 | -1.64 | 9.50E-01 |
| EGLN1    | 0.64 | 2.63E-01 | 1.28  | 1.01E-01 | -0.66 | 7.46E-01 |
| PANX3    | 0.63 | 2.63E-01 | 0.35  | 3.63E-01 | -0.08 | 5.31E-01 |
| DEFB124  | 0.63 | 2.63E-01 | 2.44  | 7.35E-03 | 1.47  | 7.04E-02 |
| CGGBP1   | 0.63 | 2.63E-01 | 0.53  | 3.00E-01 | -0.69 | 7.54E-01 |
| BBS1     | 0.63 | 2.63E-01 | 0.90  | 1.84E-01 | -0.99 | 8.38E-01 |
| GCLC     | 0.63 | 2.63E-01 | 0.06  | 4.74E-01 | 0.18  | 4.29E-01 |
| CORO2B   | 0.63 | 2.63E-01 | 2.54  | 5.58E-03 | 0.17  | 4.31E-01 |
| CFH      | 0.63 | 2.63E-01 | 1.37  | 8.47E-02 | 0.14  | 4.45E-01 |
| MESDC2   | 0.63 | 2.63E-01 | -0.53 | 7.03E-01 | 0.55  | 2.91E-01 |
| KCNJ16   | 0.63 | 2.63E-01 | -0.37 | 6.45E-01 | 0.66  | 2.55E-01 |
| ITGA10   | 0.63 | 2.63E-01 | -0.04 | 5.17E-01 | 0.43  | 3.34E-01 |
| VEPH1    | 0.63 | 2.63E-01 | 0.48  | 3.14E-01 | 0.04  | 4.82E-01 |
| TLN2     | 0.63 | 2.63E-01 | 0.39  | 3.49E-01 | 0.50  | 3.08E-01 |
| SSR3     | 0.63 | 2.63E-01 | 0.81  | 2.09E-01 | -0.45 | 6.75E-01 |
| CRH      | 0.63 | 2.63E-01 | -1.01 | 8.43E-01 | 0.87  | 1.93E-01 |
| COPA     | 0.63 | 2.63E-01 | 0.43  | 3.35E-01 | -0.06 | 5.25E-01 |
| SLITRK1  | 0.63 | 2.63E-01 | -0.37 | 6.46E-01 | -0.06 | 5.22E-01 |
| PIK3R2   | 0.63 | 2.63E-01 | 1.07  | 1.42E-01 | 0.43  | 3.33E-01 |
| CALCRL   | 0.63 | 2.64E-01 | -0.64 | 7.40E-01 | 0.94  | 1.72E-01 |
| GPNMB    | 0.63 | 2.64E-01 | 0.02  | 4.90E-01 | 0.04  | 4.83E-01 |

|          |      |          |       |          |       |          |
|----------|------|----------|-------|----------|-------|----------|
| C15orf32 | 0.63 | 2.64E-01 | 0.07  | 4.74E-01 | 1.24  | 1.08E-01 |
| ZNF284   | 0.63 | 2.64E-01 | 1.11  | 1.33E-01 | -1.03 | 8.49E-01 |
| TMEM70   | 0.63 | 2.64E-01 | -0.18 | 5.73E-01 | 0.17  | 4.32E-01 |
| ARHGEF5  | 0.63 | 2.64E-01 | 0.64  | 2.61E-01 | -0.63 | 7.36E-01 |
| LAMTOR1  | 0.63 | 2.64E-01 | 0.77  | 2.20E-01 | -0.35 | 6.38E-01 |
| SYT17    | 0.63 | 2.64E-01 | -0.31 | 6.22E-01 | 0.33  | 3.69E-01 |
| VPS13B   | 0.63 | 2.64E-01 | 0.86  | 1.96E-01 | -1.06 | 8.55E-01 |
| SLC51B   | 0.63 | 2.64E-01 | 1.61  | 5.42E-02 | 0.94  | 1.75E-01 |
| MTBP     | 0.63 | 2.64E-01 | -0.75 | 7.72E-01 | 1.37  | 8.48E-02 |
| EDN2     | 0.63 | 2.64E-01 | -0.24 | 5.94E-01 | 1.20  | 1.14E-01 |
| BDH2     | 0.63 | 2.64E-01 | 1.08  | 1.40E-01 | -0.66 | 7.46E-01 |
| TRPC4AP  | 0.63 | 2.64E-01 | 0.78  | 2.18E-01 | -0.54 | 7.06E-01 |
| LNX1     | 0.63 | 2.64E-01 | 0.25  | 4.01E-01 | 0.33  | 3.71E-01 |
| NPRL2    | 0.63 | 2.64E-01 | -1.18 | 8.81E-01 | 1.57  | 5.82E-02 |
| RRP12    | 0.63 | 2.65E-01 | 1.05  | 1.47E-01 | -0.67 | 7.49E-01 |
| NID1     | 0.63 | 2.65E-01 | 0.17  | 4.33E-01 | 0.16  | 4.35E-01 |
| C2orf27B | 0.63 | 2.65E-01 | -1.26 | 8.96E-01 | 1.71  | 4.39E-02 |
| AP4S1    | 0.63 | 2.65E-01 | 1.14  | 1.27E-01 | 2.56  | 5.22E-03 |
| LANCL2   | 0.63 | 2.65E-01 | -0.44 | 6.71E-01 | 0.57  | 2.84E-01 |
| KCNA3    | 0.63 | 2.65E-01 | -0.99 | 8.38E-01 | 0.99  | 1.61E-01 |
| JMY      | 0.63 | 2.65E-01 | 0.46  | 3.24E-01 | 0.78  | 2.17E-01 |
| ZFAND6   | 0.63 | 2.65E-01 | 2.30  | 1.08E-02 | -1.36 | 9.13E-01 |
| NSFL1C   | 0.63 | 2.65E-01 | 0.03  | 4.87E-01 | -0.04 | 5.15E-01 |
| NOXO1    | 0.63 | 2.65E-01 | 1.11  | 1.35E-01 | -1.75 | 9.60E-01 |
| ZDHHC8   | 0.63 | 2.65E-01 | 0.31  | 3.78E-01 | 1.68  | 4.61E-02 |
| IGSF5    | 0.63 | 2.65E-01 | 0.32  | 3.74E-01 | 0.12  | 4.50E-01 |
| CLDND1   | 0.63 | 2.66E-01 | -0.95 | 8.29E-01 | 0.70  | 2.41E-01 |
| ITPR3    | 0.63 | 2.66E-01 | -0.12 | 5.49E-01 | 0.53  | 2.97E-01 |
| HIC1     | 0.63 | 2.66E-01 | 0.60  | 2.75E-01 | 1.19  | 1.18E-01 |
| SLC24A2  | 0.63 | 2.66E-01 | 2.01  | 2.20E-02 | -0.87 | 8.09E-01 |
| RAP2B    | 0.63 | 2.66E-01 | 0.26  | 3.96E-01 | -0.87 | 8.08E-01 |

|              |      |          |       |          |       |          |
|--------------|------|----------|-------|----------|-------|----------|
| FUS          | 0.63 | 2.66E-01 | 0.40  | 3.44E-01 | 0.76  | 2.24E-01 |
| NARS         | 0.63 | 2.66E-01 | 1.45  | 7.41E-02 | 1.51  | 6.55E-02 |
| RAB3B        | 0.63 | 2.66E-01 | -0.37 | 6.45E-01 | 0.32  | 3.73E-01 |
| RNASE6       | 0.62 | 2.66E-01 | 1.16  | 1.23E-01 | 1.36  | 8.65E-02 |
| BSN          | 0.62 | 2.66E-01 | -1.21 | 8.88E-01 | 2.22  | 1.33E-02 |
| STYX         | 0.62 | 2.66E-01 | 1.13  | 1.29E-01 | -1.09 | 8.63E-01 |
| YPEL1        | 0.62 | 2.66E-01 | -1.70 | 9.56E-01 | 2.54  | 5.51E-03 |
| C1QTNF9B     | 0.62 | 2.66E-01 | -0.19 | 5.77E-01 | 0.34  | 3.66E-01 |
| NKIRAS1      | 0.62 | 2.66E-01 | 0.59  | 2.78E-01 | -0.98 | 8.36E-01 |
| TACR2        | 0.62 | 2.66E-01 | 0.26  | 3.99E-01 | 0.74  | 2.29E-01 |
| SUMO3        | 0.62 | 2.66E-01 | 0.06  | 4.77E-01 | -0.56 | 7.13E-01 |
| C9orf24      | 0.62 | 2.67E-01 | -0.64 | 7.38E-01 | 1.00  | 1.59E-01 |
| ZNF276       | 0.62 | 2.67E-01 | -0.22 | 5.86E-01 | 1.29  | 9.78E-02 |
| TPRG1L       | 0.62 | 2.67E-01 | -0.44 | 6.70E-01 | 0.09  | 4.64E-01 |
| SHARPIN      | 0.62 | 2.67E-01 | 0.27  | 3.93E-01 | 0.13  | 4.49E-01 |
| VPS72        | 0.62 | 2.67E-01 | 0.33  | 3.69E-01 | -0.14 | 5.56E-01 |
| ZDHHC1       | 0.62 | 2.67E-01 | -1.97 | 9.76E-01 | 1.44  | 7.56E-02 |
| ATP5E        | 0.62 | 2.67E-01 | -1.27 | 8.98E-01 | 0.92  | 1.78E-01 |
| LUZPP1       | 0.62 | 2.67E-01 | 0.34  | 3.66E-01 | -0.66 | 7.44E-01 |
| CCND3        | 0.62 | 2.67E-01 | 0.53  | 2.96E-01 | -1.53 | 9.37E-01 |
| AGPAT5       | 0.62 | 2.67E-01 | -0.21 | 5.84E-01 | 1.37  | 8.60E-02 |
| SLC7A4       | 0.62 | 2.67E-01 | 0.86  | 1.94E-01 | 0.35  | 3.63E-01 |
| PTP4A2       | 0.62 | 2.67E-01 | 0.45  | 3.25E-01 | 0.77  | 2.21E-01 |
| TP53TG5      | 0.62 | 2.67E-01 | 0.18  | 4.27E-01 | 0.19  | 4.26E-01 |
| TAF15        | 0.62 | 2.67E-01 | -1.03 | 8.49E-01 | 0.89  | 1.87E-01 |
| ZDHHC24      | 0.62 | 2.67E-01 | 0.91  | 1.82E-01 | -0.79 | 7.84E-01 |
| C22orf15     | 0.62 | 2.68E-01 | -0.44 | 6.72E-01 | 1.94  | 2.64E-02 |
| TOE1         | 0.62 | 2.68E-01 | -0.20 | 5.80E-01 | 0.31  | 3.78E-01 |
| RP11-368I7.4 | 0.62 | 2.68E-01 | 0.51  | 3.06E-01 | 0.08  | 4.68E-01 |
| OR6C70       | 0.62 | 2.68E-01 | -1.02 | 8.46E-01 | 1.01  | 1.55E-01 |
| NPLOC4       | 0.62 | 2.68E-01 | -0.16 | 5.64E-01 | 0.40  | 3.45E-01 |

|               |      |          |       |          |       |          |
|---------------|------|----------|-------|----------|-------|----------|
| MED26         | 0.62 | 2.68E-01 | -0.40 | 6.56E-01 | 0.06  | 4.76E-01 |
| UBE2J2        | 0.62 | 2.68E-01 | 0.10  | 4.60E-01 | 0.68  | 2.49E-01 |
| ALKBH3        | 0.62 | 2.68E-01 | 1.23  | 1.10E-01 | -2.22 | 9.87E-01 |
| NAA16         | 0.62 | 2.68E-01 | 0.51  | 3.06E-01 | -0.30 | 6.17E-01 |
| VPS13D        | 0.62 | 2.68E-01 | 0.39  | 3.48E-01 | -0.74 | 7.70E-01 |
| KLHL14        | 0.62 | 2.68E-01 | 1.15  | 1.25E-01 | -0.96 | 8.32E-01 |
| PFKFB2        | 0.62 | 2.68E-01 | 0.84  | 1.99E-01 | -0.85 | 8.03E-01 |
| PRKCQ         | 0.62 | 2.68E-01 | 1.42  | 7.81E-02 | 1.34  | 8.95E-02 |
| SLC15A1       | 0.62 | 2.68E-01 | 0.42  | 3.37E-01 | 0.59  | 2.76E-01 |
| SHOC2         | 0.62 | 2.68E-01 | 0.89  | 1.87E-01 | 0.37  | 3.54E-01 |
| COL9A1        | 0.62 | 2.68E-01 | 0.40  | 3.44E-01 | 0.78  | 2.18E-01 |
| PRLHR         | 0.62 | 2.68E-01 | -1.04 | 8.52E-01 | 0.86  | 1.96E-01 |
| ST8SIA2       | 0.62 | 2.69E-01 | -0.25 | 5.98E-01 | 1.40  | 8.09E-02 |
| ZNF106        | 0.62 | 2.69E-01 | 1.65  | 4.94E-02 | -1.12 | 8.68E-01 |
| IL17F         | 0.62 | 2.69E-01 | 1.44  | 7.43E-02 | -0.82 | 7.94E-01 |
| TIMELESS      | 0.62 | 2.69E-01 | 0.00  | 5.00E-01 | 0.46  | 3.23E-01 |
| ZNF267        | 0.62 | 2.69E-01 | 0.90  | 1.84E-01 | -0.99 | 8.39E-01 |
| MYOM3         | 0.62 | 2.69E-01 | 0.01  | 4.96E-01 | 1.23  | 1.10E-01 |
| USP24         | 0.62 | 2.69E-01 | 0.35  | 3.63E-01 | 0.06  | 4.75E-01 |
| HIPK3         | 0.62 | 2.69E-01 | 0.09  | 4.65E-01 | 0.41  | 3.41E-01 |
| RRAS2         | 0.62 | 2.69E-01 | 0.71  | 2.40E-01 | -0.74 | 7.71E-01 |
| KLHL35        | 0.62 | 2.69E-01 | 0.07  | 4.72E-01 | -0.57 | 7.14E-01 |
| SNRPD2        | 0.62 | 2.69E-01 | 0.25  | 4.00E-01 | 0.19  | 4.25E-01 |
| MMP24         | 0.62 | 2.69E-01 | -0.40 | 6.57E-01 | 0.15  | 4.40E-01 |
| ESCO1         | 0.61 | 2.69E-01 | 0.85  | 1.96E-01 | -0.93 | 8.24E-01 |
| ESR1          | 0.61 | 2.69E-01 | 1.11  | 1.33E-01 | 1.17  | 1.22E-01 |
| OR6C68        | 0.61 | 2.69E-01 | -0.21 | 5.84E-01 | 1.12  | 1.32E-01 |
| RP4-583P15.15 | 0.61 | 2.69E-01 | 0.83  | 2.04E-01 | 0.67  | 2.53E-01 |
| ENTPD4        | 0.61 | 2.70E-01 | -0.17 | 5.68E-01 | 0.54  | 2.94E-01 |
| COX6A1P2      | 0.61 | 2.70E-01 | 0.24  | 4.05E-01 | -0.32 | 6.25E-01 |
| MRPS18A       | 0.61 | 2.70E-01 | 0.41  | 3.41E-01 | -1.04 | 8.51E-01 |

|          |      |          |       |          |       |          |
|----------|------|----------|-------|----------|-------|----------|
| ALG2     | 0.61 | 2.70E-01 | 0.28  | 3.89E-01 | -0.11 | 5.45E-01 |
| FAM204A  | 0.61 | 2.70E-01 | -0.05 | 5.20E-01 | 0.01  | 4.95E-01 |
| MAPK12   | 0.61 | 2.70E-01 | -0.17 | 5.66E-01 | 0.21  | 4.15E-01 |
| AP4E1    | 0.61 | 2.70E-01 | -0.04 | 5.15E-01 | -0.27 | 6.06E-01 |
| HNRNPUL1 | 0.61 | 2.70E-01 | 1.43  | 7.70E-02 | -0.21 | 5.83E-01 |
| FOXL2    | 0.61 | 2.70E-01 | 0.97  | 1.66E-01 | -0.90 | 8.15E-01 |
| PPIG     | 0.61 | 2.70E-01 | 1.70  | 4.46E-02 | 1.33  | 9.24E-02 |
| RTCB     | 0.61 | 2.70E-01 | 0.58  | 2.83E-01 | -0.22 | 5.88E-01 |
| FGFR1OP  | 0.61 | 2.70E-01 | 1.20  | 1.15E-01 | 1.89  | 2.93E-02 |
| ASIP     | 0.61 | 2.70E-01 | -0.61 | 7.29E-01 | 1.24  | 1.08E-01 |
| PKIA     | 0.61 | 2.70E-01 | 1.13  | 1.29E-01 | 1.00  | 1.58E-01 |
| GRIA1    | 0.61 | 2.70E-01 | 0.36  | 3.61E-01 | 0.21  | 4.17E-01 |
| STMN2    | 0.61 | 2.70E-01 | 0.10  | 4.59E-01 | -0.25 | 5.99E-01 |
| CCDC154  | 0.61 | 2.70E-01 | 0.63  | 2.65E-01 | -0.71 | 7.61E-01 |
| PRDM10   | 0.61 | 2.70E-01 | -0.22 | 5.89E-01 | 0.28  | 3.88E-01 |
| CPSF6    | 0.61 | 2.70E-01 | 0.08  | 4.70E-01 | 0.55  | 2.92E-01 |
| RFXANK   | 0.61 | 2.70E-01 | 0.69  | 2.44E-01 | 0.95  | 1.70E-01 |
| RORA     | 0.61 | 2.71E-01 | 1.35  | 8.92E-02 | -1.24 | 8.92E-01 |
| PES1     | 0.61 | 2.71E-01 | 0.95  | 1.72E-01 | -1.06 | 8.56E-01 |
| GNB4     | 0.61 | 2.71E-01 | 0.66  | 2.56E-01 | -1.44 | 9.25E-01 |
| VPS11    | 0.61 | 2.71E-01 | 0.40  | 3.43E-01 | 0.02  | 4.93E-01 |
| NR1D2    | 0.61 | 2.71E-01 | 0.61  | 2.71E-01 | -1.56 | 9.41E-01 |
| ACTBL2   | 0.61 | 2.71E-01 | -0.63 | 7.37E-01 | 0.71  | 2.38E-01 |
| CCL5     | 0.61 | 2.71E-01 | -0.60 | 7.27E-01 | 0.63  | 2.64E-01 |
| KIAA1239 | 0.61 | 2.71E-01 | 1.12  | 1.30E-01 | 1.17  | 1.22E-01 |
| NCOA7    | 0.61 | 2.71E-01 | -0.56 | 7.11E-01 | 0.50  | 3.09E-01 |
| NPAS4    | 0.61 | 2.71E-01 | 0.70  | 2.42E-01 | -0.95 | 8.28E-01 |
| EVPL     | 0.61 | 2.71E-01 | 0.36  | 3.59E-01 | 1.06  | 1.46E-01 |
| KRTAP5-4 | 0.61 | 2.71E-01 | 0.51  | 3.07E-01 | -0.29 | 6.14E-01 |
| MED7     | 0.61 | 2.71E-01 | -0.33 | 6.29E-01 | -0.15 | 5.58E-01 |
| SNRPD1   | 0.61 | 2.71E-01 | 1.18  | 1.20E-01 | -1.11 | 8.67E-01 |



|          |      |          |       |          |       |          |
|----------|------|----------|-------|----------|-------|----------|
| HBCBP    | 0.61 | 2.71E-01 | -1.18 | 8.80E-01 | 1.33  | 9.12E-02 |
| TMEM98   | 0.61 | 2.72E-01 | -1.11 | 8.67E-01 | 1.30  | 9.75E-02 |
| RHOA     | 0.61 | 2.72E-01 | -0.57 | 7.17E-01 | 2.23  | 1.29E-02 |
| RAET1L   | 0.61 | 2.72E-01 | -0.57 | 7.14E-01 | 0.76  | 2.23E-01 |
| VMO1     | 0.61 | 2.72E-01 | -1.63 | 9.48E-01 | 1.09  | 1.39E-01 |
| IRGQ     | 0.61 | 2.72E-01 | -0.66 | 7.45E-01 | 0.34  | 3.66E-01 |
| SNRPC    | 0.61 | 2.72E-01 | -0.75 | 7.73E-01 | 2.17  | 1.51E-02 |
| CCNB1    | 0.61 | 2.72E-01 | -0.28 | 6.12E-01 | 0.88  | 1.91E-01 |
| TGFBR3   | 0.61 | 2.72E-01 | 0.49  | 3.14E-01 | -0.24 | 5.96E-01 |
| FBXO48   | 0.61 | 2.72E-01 | -1.57 | 9.42E-01 | 1.79  | 3.65E-02 |
| NIT2     | 0.61 | 2.72E-01 | 0.19  | 4.24E-01 | 0.06  | 4.77E-01 |
| IQCF3    | 0.61 | 2.72E-01 | 1.68  | 4.70E-02 | -0.65 | 7.43E-01 |
| FAM160B2 | 0.61 | 2.72E-01 | 0.49  | 3.11E-01 | 0.32  | 3.76E-01 |
| CXCR5    | 0.61 | 2.72E-01 | 0.80  | 2.13E-01 | -1.23 | 8.90E-01 |
| RECQL5   | 0.61 | 2.72E-01 | -0.49 | 6.89E-01 | 1.41  | 7.94E-02 |
| FAM107A  | 0.61 | 2.72E-01 | 2.56  | 5.24E-03 | 0.46  | 3.24E-01 |
| TMX3     | 0.61 | 2.72E-01 | 0.98  | 1.63E-01 | -1.62 | 9.47E-01 |
| TUBE1    | 0.61 | 2.72E-01 | 0.65  | 2.57E-01 | 0.39  | 3.49E-01 |
| ELMSAN1  | 0.61 | 2.72E-01 | -0.19 | 5.76E-01 | 0.29  | 3.87E-01 |
| SCFD1    | 0.60 | 2.73E-01 | 0.29  | 3.86E-01 | 0.70  | 2.43E-01 |
| SCN5A    | 0.60 | 2.73E-01 | -0.27 | 6.05E-01 | 0.44  | 3.30E-01 |
| PKD2     | 0.60 | 2.73E-01 | -0.53 | 7.03E-01 | 0.44  | 3.31E-01 |
| HIST1H1C | 0.60 | 2.73E-01 | -0.71 | 7.61E-01 | 0.38  | 3.52E-01 |
| OPA3     | 0.60 | 2.73E-01 | -0.87 | 8.09E-01 | 1.64  | 5.08E-02 |
| MMADHC   | 0.60 | 2.73E-01 | 0.71  | 2.40E-01 | -0.76 | 7.77E-01 |
| HOXA5    | 0.60 | 2.73E-01 | 0.21  | 4.17E-01 | 0.99  | 1.61E-01 |
| MAF1     | 0.60 | 2.73E-01 | 0.26  | 3.99E-01 | 0.12  | 4.54E-01 |
| NAA50    | 0.60 | 2.73E-01 | 1.32  | 9.40E-02 | -1.10 | 8.64E-01 |
| TUBGCP4  | 0.60 | 2.73E-01 | 0.65  | 2.57E-01 | 1.01  | 1.56E-01 |
| EEA1     | 0.60 | 2.73E-01 | -0.03 | 5.10E-01 | -0.15 | 5.60E-01 |
| PRRX2    | 0.60 | 2.73E-01 | 0.52  | 3.01E-01 | 0.52  | 3.03E-01 |

|          |      |          |       |          |       |          |
|----------|------|----------|-------|----------|-------|----------|
| TMEM151A | 0.60 | 2.73E-01 | 0.99  | 1.60E-01 | -0.59 | 7.21E-01 |
| COX6C    | 0.60 | 2.73E-01 | 0.12  | 4.50E-01 | -0.47 | 6.81E-01 |
| SSTR3    | 0.60 | 2.73E-01 | -0.44 | 6.70E-01 | 0.83  | 2.04E-01 |
| RNF41    | 0.60 | 2.73E-01 | 0.86  | 1.94E-01 | 0.07  | 4.73E-01 |
| ATP13A5  | 0.60 | 2.73E-01 | -0.33 | 6.31E-01 | -0.06 | 5.23E-01 |
| RNF112   | 0.60 | 2.74E-01 | 1.03  | 1.51E-01 | -1.12 | 8.69E-01 |
| SFTPA1   | 0.60 | 2.74E-01 | 0.52  | 3.03E-01 | -0.28 | 6.11E-01 |
| BID      | 0.60 | 2.74E-01 | 0.60  | 2.73E-01 | 0.61  | 2.70E-01 |
| GYPB     | 0.60 | 2.74E-01 | 1.22  | 1.11E-01 | -0.04 | 5.15E-01 |
| IDH2     | 0.60 | 2.74E-01 | 0.11  | 4.55E-01 | -0.16 | 5.64E-01 |
| UBE2F    | 0.60 | 2.74E-01 | 0.14  | 4.45E-01 | -0.08 | 5.33E-01 |
| PKD2L1   | 0.60 | 2.74E-01 | 0.12  | 4.52E-01 | 1.39  | 8.16E-02 |
| MSI2     | 0.60 | 2.74E-01 | 1.10  | 1.36E-01 | 0.66  | 2.56E-01 |
| RNF166   | 0.60 | 2.74E-01 | 0.08  | 4.67E-01 | -0.43 | 6.66E-01 |
| CRISP1   | 0.60 | 2.74E-01 | 1.33  | 9.19E-02 | -0.35 | 6.35E-01 |
| NAP1L1   | 0.60 | 2.74E-01 | 1.01  | 1.56E-01 | -0.83 | 7.96E-01 |
| ZNF721   | 0.60 | 2.74E-01 | 1.31  | 9.56E-02 | -2.37 | 9.91E-01 |
| ASPCR1   | 0.60 | 2.74E-01 | 0.67  | 2.52E-01 | 0.44  | 3.31E-01 |
| ASCL5    | 0.60 | 2.74E-01 | -1.01 | 8.43E-01 | 1.06  | 1.45E-01 |
| IZUMO1   | 0.60 | 2.74E-01 | 0.10  | 4.62E-01 | 0.39  | 3.48E-01 |
| HES2     | 0.60 | 2.74E-01 | 1.31  | 9.59E-02 | -1.91 | 9.72E-01 |
| BNC1     | 0.60 | 2.74E-01 | -0.02 | 5.09E-01 | 1.93  | 2.68E-02 |
| UBE2V2   | 0.60 | 2.74E-01 | 1.92  | 2.72E-02 | 0.85  | 1.99E-01 |
| MRPS34   | 0.60 | 2.74E-01 | 0.66  | 2.53E-01 | 1.02  | 1.53E-01 |
| SORCS2   | 0.60 | 2.74E-01 | 0.29  | 3.85E-01 | 1.85  | 3.22E-02 |
| UBA7     | 0.60 | 2.75E-01 | -1.64 | 9.49E-01 | 1.41  | 7.95E-02 |
| CRIP1    | 0.60 | 2.75E-01 | 1.11  | 1.34E-01 | -0.89 | 8.13E-01 |
| CRIP1    | 0.60 | 2.75E-01 | 1.11  | 1.34E-01 | -0.89 | 8.13E-01 |
| TDRD7    | 0.60 | 2.75E-01 | 0.59  | 2.76E-01 | -0.13 | 5.50E-01 |
| RAD52    | 0.60 | 2.75E-01 | -0.35 | 6.37E-01 | 0.26  | 3.97E-01 |
| ZNF736   | 0.60 | 2.75E-01 | 0.50  | 3.07E-01 | 0.07  | 4.71E-01 |

|                |      |          |       |          |       |          |
|----------------|------|----------|-------|----------|-------|----------|
| CCNG2          | 0.60 | 2.75E-01 | 0.92  | 1.79E-01 | 0.28  | 3.90E-01 |
| TNFAIP8L1      | 0.60 | 2.75E-01 | 0.53  | 2.99E-01 | -0.05 | 5.22E-01 |
| IGFBP3         | 0.60 | 2.75E-01 | 0.15  | 4.41E-01 | 0.04  | 4.85E-01 |
| SNAPC1         | 0.60 | 2.75E-01 | -0.59 | 7.23E-01 | 1.43  | 7.66E-02 |
| TMCC2          | 0.60 | 2.75E-01 | 0.64  | 2.60E-01 | -0.59 | 7.23E-01 |
| FUCA1          | 0.60 | 2.75E-01 | -1.10 | 8.65E-01 | 1.39  | 8.22E-02 |
| RNF8           | 0.60 | 2.75E-01 | 0.68  | 2.49E-01 | -0.67 | 7.48E-01 |
| SNURF          | 0.60 | 2.75E-01 | -0.55 | 7.08E-01 | 0.26  | 3.98E-01 |
| C15orf38-AP3S2 | 0.60 | 2.75E-01 | 0.46  | 3.24E-01 | -0.65 | 7.42E-01 |
| SLC35F1        | 0.60 | 2.75E-01 | -0.46 | 6.79E-01 | 0.65  | 2.57E-01 |
| MTRF2          | 0.60 | 2.75E-01 | 1.27  | 1.02E-01 | -0.70 | 7.59E-01 |
| ANKRD39        | 0.60 | 2.75E-01 | 2.25  | 1.23E-02 | 0.79  | 2.14E-01 |
| RRP9           | 0.60 | 2.75E-01 | 0.19  | 4.23E-01 | 0.11  | 4.55E-01 |
| PKM            | 0.60 | 2.75E-01 | -0.25 | 5.97E-01 | 0.49  | 3.13E-01 |
| MPPED1         | 0.60 | 2.75E-01 | 1.12  | 1.30E-01 | 0.25  | 4.02E-01 |
| STK3           | 0.60 | 2.75E-01 | 0.97  | 1.66E-01 | -1.84 | 9.67E-01 |
| CAND2          | 0.60 | 2.76E-01 | 1.51  | 6.56E-02 | -1.10 | 8.65E-01 |
| ANK1           | 0.60 | 2.76E-01 | 0.60  | 2.73E-01 | -0.03 | 5.11E-01 |
| TCTEX1D4       | 0.60 | 2.76E-01 | 2.36  | 9.25E-03 | -0.04 | 5.15E-01 |
| NPTN           | 0.60 | 2.76E-01 | -0.56 | 7.14E-01 | 0.36  | 3.59E-01 |
| C9orf171       | 0.60 | 2.76E-01 | 0.50  | 3.07E-01 | -0.13 | 5.51E-01 |
| LSMD1          | 0.60 | 2.76E-01 | 0.80  | 2.13E-01 | -0.26 | 6.02E-01 |
| DRD1           | 0.60 | 2.76E-01 | 0.89  | 1.86E-01 | -0.55 | 7.08E-01 |
| LENG9          | 0.60 | 2.76E-01 | 0.79  | 2.16E-01 | -0.31 | 6.22E-01 |
| ZIC5           | 0.59 | 2.76E-01 | 0.59  | 2.78E-01 | 1.46  | 7.16E-02 |
| PDGFB          | 0.59 | 2.76E-01 | -0.43 | 6.67E-01 | 0.78  | 2.17E-01 |
| SLC2A4RG       | 0.59 | 2.76E-01 | 0.66  | 2.53E-01 | 0.86  | 1.94E-01 |
| FABP4          | 0.59 | 2.76E-01 | -0.15 | 5.58E-01 | 0.71  | 2.40E-01 |
| HBP1           | 0.59 | 2.76E-01 | 0.59  | 2.78E-01 | 1.59  | 5.61E-02 |
| C3orf84        | 0.59 | 2.76E-01 | -1.86 | 9.69E-01 | 1.69  | 4.59E-02 |
| FOXC1          | 0.59 | 2.76E-01 | -0.78 | 7.84E-01 | 1.94  | 2.64E-02 |

|              |      |          |       |          |       |          |
|--------------|------|----------|-------|----------|-------|----------|
| CLSTN2       | 0.59 | 2.76E-01 | 0.04  | 4.85E-01 | 0.29  | 3.88E-01 |
| ALOX5AP      | 0.59 | 2.76E-01 | -0.41 | 6.60E-01 | 0.50  | 3.08E-01 |
| TANC1        | 0.59 | 2.76E-01 | 0.74  | 2.30E-01 | 0.71  | 2.39E-01 |
| WFDC8        | 0.59 | 2.76E-01 | 0.21  | 4.19E-01 | 0.00  | 5.02E-01 |
| BLOC1S5      | 0.59 | 2.76E-01 | 2.16  | 1.53E-02 | -0.12 | 5.48E-01 |
| POLR2C       | 0.59 | 2.76E-01 | 0.39  | 3.50E-01 | 0.02  | 4.92E-01 |
| UTP14C       | 0.59 | 2.76E-01 | -0.19 | 5.77E-01 | 1.93  | 2.65E-02 |
| CD2AP        | 0.59 | 2.76E-01 | 0.88  | 1.89E-01 | -1.06 | 8.56E-01 |
| HDDC2        | 0.59 | 2.76E-01 | -0.11 | 5.43E-01 | 1.46  | 7.16E-02 |
| FBXO46       | 0.59 | 2.76E-01 | 0.44  | 3.31E-01 | 1.01  | 1.55E-01 |
| HAO2         | 0.59 | 2.77E-01 | -0.88 | 8.11E-01 | 1.83  | 3.38E-02 |
| BEND5        | 0.59 | 2.77E-01 | 0.65  | 2.59E-01 | -0.44 | 6.68E-01 |
| MYH15        | 0.59 | 2.77E-01 | 0.66  | 2.54E-01 | 0.10  | 4.60E-01 |
| DDX60L       | 0.59 | 2.77E-01 | 0.27  | 3.92E-01 | -0.10 | 5.39E-01 |
| TRIM6-TRIM34 | 0.59 | 2.77E-01 | 0.50  | 3.07E-01 | 1.48  | 7.00E-02 |
| SSTR5        | 0.59 | 2.77E-01 | 0.48  | 3.15E-01 | -0.62 | 7.32E-01 |
| RAB13        | 0.59 | 2.77E-01 | 0.04  | 4.84E-01 | 1.52  | 6.37E-02 |
| KPNA3        | 0.59 | 2.77E-01 | 1.10  | 1.36E-01 | 0.75  | 2.28E-01 |
| GBP2         | 0.59 | 2.77E-01 | 0.76  | 2.24E-01 | -0.25 | 6.00E-01 |
| AGTRAP       | 0.59 | 2.77E-01 | -0.20 | 5.78E-01 | 0.19  | 4.25E-01 |
| ZSWIM6       | 0.59 | 2.77E-01 | -1.70 | 9.55E-01 | 1.61  | 5.40E-02 |
| TTC36        | 0.59 | 2.77E-01 | 0.90  | 1.84E-01 | 0.06  | 4.74E-01 |
| FGG          | 0.59 | 2.77E-01 | 1.54  | 6.20E-02 | -1.12 | 8.69E-01 |
| PVALB        | 0.59 | 2.77E-01 | 0.26  | 3.98E-01 | 0.05  | 4.79E-01 |
| ZNF408       | 0.59 | 2.77E-01 | -0.82 | 7.93E-01 | 0.80  | 2.11E-01 |
| CCDC103      | 0.59 | 2.77E-01 | 1.58  | 5.71E-02 | -0.77 | 7.81E-01 |
| CD247        | 0.59 | 2.77E-01 | -0.27 | 6.05E-01 | 0.89  | 1.88E-01 |
| CD3G         | 0.59 | 2.77E-01 | 0.38  | 3.50E-01 | -0.57 | 7.17E-01 |
| PIP5K1A      | 0.59 | 2.78E-01 | 0.10  | 4.62E-01 | 0.05  | 4.79E-01 |
| TULP3        | 0.59 | 2.78E-01 | 1.50  | 6.63E-02 | -0.51 | 6.95E-01 |
| ULBP3        | 0.59 | 2.78E-01 | 0.67  | 2.52E-01 | 0.63  | 2.63E-01 |

|           |      |          |       |          |       |          |
|-----------|------|----------|-------|----------|-------|----------|
| GPR183    | 0.59 | 2.78E-01 | 0.17  | 4.33E-01 | 0.68  | 2.49E-01 |
| ZNF799    | 0.59 | 2.78E-01 | -1.43 | 9.23E-01 | 1.20  | 1.15E-01 |
| FECH      | 0.59 | 2.78E-01 | 1.43  | 7.68E-02 | 0.33  | 3.70E-01 |
| TCTA      | 0.59 | 2.78E-01 | -1.18 | 8.81E-01 | 1.93  | 2.67E-02 |
| RNF157    | 0.59 | 2.78E-01 | 0.95  | 1.70E-01 | 0.98  | 1.63E-01 |
| OR2M7     | 0.59 | 2.78E-01 | -0.36 | 6.41E-01 | 0.42  | 3.38E-01 |
| CRYGC     | 0.59 | 2.78E-01 | -0.66 | 7.44E-01 | 0.85  | 1.97E-01 |
| SAMSN1    | 0.59 | 2.78E-01 | 0.83  | 2.04E-01 | -0.96 | 8.30E-01 |
| ARFGEF1   | 0.59 | 2.78E-01 | 0.61  | 2.70E-01 | -1.21 | 8.87E-01 |
| EXOSC1    | 0.59 | 2.78E-01 | -0.10 | 5.41E-01 | 0.52  | 3.02E-01 |
| ARHGAP15  | 0.59 | 2.78E-01 | 1.63  | 5.14E-02 | 0.21  | 4.16E-01 |
| MED21     | 0.59 | 2.79E-01 | -0.12 | 5.48E-01 | 0.03  | 4.88E-01 |
| OCEL1     | 0.59 | 2.79E-01 | -0.44 | 6.71E-01 | 0.13  | 4.48E-01 |
| KIAA1033  | 0.59 | 2.79E-01 | 1.14  | 1.27E-01 | -0.65 | 7.41E-01 |
| HSPB1     | 0.59 | 2.79E-01 | -0.03 | 5.11E-01 | 0.71  | 2.38E-01 |
| RASGEF1A  | 0.59 | 2.79E-01 | -1.46 | 9.28E-01 | 0.81  | 2.09E-01 |
| ANHX      | 0.59 | 2.79E-01 | 0.77  | 2.22E-01 | -0.66 | 7.47E-01 |
| GNA14     | 0.59 | 2.79E-01 | 0.47  | 3.21E-01 | 0.66  | 2.55E-01 |
| VKORC1L1  | 0.59 | 2.79E-01 | -0.13 | 5.50E-01 | 0.42  | 3.36E-01 |
| TMCO2     | 0.59 | 2.79E-01 | -0.41 | 6.60E-01 | 0.72  | 2.37E-01 |
| ALOX5     | 0.59 | 2.79E-01 | 0.87  | 1.93E-01 | -0.52 | 7.00E-01 |
| HIST1H2BG | 0.59 | 2.79E-01 | 0.27  | 3.94E-01 | 2.09  | 1.83E-02 |
| RAC1      | 0.58 | 2.79E-01 | 0.66  | 2.55E-01 | 0.70  | 2.41E-01 |
| DNER      | 0.58 | 2.79E-01 | -0.96 | 8.32E-01 | 1.61  | 5.36E-02 |
| FRMD8     | 0.58 | 2.79E-01 | 0.72  | 2.37E-01 | -1.20 | 8.85E-01 |
| AP2S1     | 0.58 | 2.79E-01 | 1.54  | 6.20E-02 | -0.35 | 6.36E-01 |
| MN1       | 0.58 | 2.80E-01 | -0.75 | 7.73E-01 | 0.39  | 3.48E-01 |
| C1orf115  | 0.58 | 2.80E-01 | 0.55  | 2.90E-01 | -0.06 | 5.24E-01 |
| CERS4     | 0.58 | 2.80E-01 | -0.94 | 8.27E-01 | 0.83  | 2.02E-01 |
| S100A11   | 0.58 | 2.80E-01 | 1.10  | 1.36E-01 | -1.68 | 9.54E-01 |
| BTG2      | 0.58 | 2.80E-01 | 0.05  | 4.78E-01 | -0.58 | 7.20E-01 |

|           |      |          |       |          |       |          |
|-----------|------|----------|-------|----------|-------|----------|
| ADAMTS9   | 0.58 | 2.80E-01 | 0.36  | 3.60E-01 | 1.74  | 4.13E-02 |
| ITGA1     | 0.58 | 2.80E-01 | 0.76  | 2.23E-01 | 1.21  | 1.13E-01 |
| CDH19     | 0.58 | 2.80E-01 | 0.24  | 4.05E-01 | -0.76 | 7.76E-01 |
| RLTPR     | 0.58 | 2.80E-01 | -0.59 | 7.21E-01 | 1.72  | 4.26E-02 |
| GALNS     | 0.58 | 2.80E-01 | 0.82  | 2.05E-01 | 1.18  | 1.19E-01 |
| OR3A2     | 0.58 | 2.80E-01 | -1.07 | 8.57E-01 | 0.98  | 1.64E-01 |
| SPP2      | 0.58 | 2.80E-01 | 1.28  | 1.00E-01 | -0.48 | 6.86E-01 |
| OR2C3     | 0.58 | 2.80E-01 | 1.20  | 1.15E-01 | -0.93 | 8.24E-01 |
| CCDC153   | 0.58 | 2.80E-01 | 0.00  | 5.00E-01 | -0.20 | 5.78E-01 |
| STRADB    | 0.58 | 2.80E-01 | 1.30  | 9.62E-02 | 0.41  | 3.42E-01 |
| CMKLR1    | 0.58 | 2.80E-01 | 1.19  | 1.17E-01 | -0.23 | 5.91E-01 |
| ATP6AP1L  | 0.58 | 2.80E-01 | -0.79 | 7.87E-01 | 0.60  | 2.73E-01 |
| ANAPC1    | 0.58 | 2.80E-01 | -0.75 | 7.73E-01 | 1.86  | 3.14E-02 |
| CD96      | 0.58 | 2.80E-01 | 0.92  | 1.80E-01 | -1.80 | 9.64E-01 |
| FRZB      | 0.58 | 2.80E-01 | 0.05  | 4.78E-01 | -0.12 | 5.46E-01 |
| ADAM17    | 0.58 | 2.80E-01 | -0.49 | 6.86E-01 | 1.72  | 4.31E-02 |
| ZFP42     | 0.58 | 2.81E-01 | 0.19  | 4.25E-01 | -0.79 | 7.85E-01 |
| SNRPD3    | 0.58 | 2.81E-01 | 0.87  | 1.92E-01 | -0.17 | 5.69E-01 |
| CSNK1A1   | 0.58 | 2.81E-01 | 0.57  | 2.85E-01 | 0.80  | 2.11E-01 |
| KRTAP4-12 | 0.58 | 2.81E-01 | 1.91  | 2.83E-02 | -0.13 | 5.54E-01 |
| PEX13     | 0.58 | 2.81E-01 | 0.54  | 2.94E-01 | 0.27  | 3.94E-01 |
| MSX1      | 0.58 | 2.81E-01 | -0.18 | 5.73E-01 | -0.36 | 6.42E-01 |
| PRKCZ     | 0.58 | 2.81E-01 | 1.07  | 1.41E-01 | -0.74 | 7.70E-01 |
| JRKL      | 0.58 | 2.81E-01 | -0.26 | 6.04E-01 | 1.48  | 7.00E-02 |
| CD44      | 0.58 | 2.81E-01 | 0.71  | 2.39E-01 | -0.58 | 7.20E-01 |
| FBXO16    | 0.58 | 2.81E-01 | 0.33  | 3.69E-01 | 0.69  | 2.45E-01 |
| GPR182    | 0.58 | 2.81E-01 | -1.18 | 8.81E-01 | 1.28  | 1.01E-01 |
| WSB2      | 0.58 | 2.81E-01 | 1.38  | 8.36E-02 | -0.53 | 7.01E-01 |
| TSTD1     | 0.58 | 2.81E-01 | -2.64 | 9.96E-01 | 1.73  | 4.22E-02 |
| F2        | 0.58 | 2.81E-01 | -0.02 | 5.09E-01 | 1.68  | 4.60E-02 |
| RPA2      | 0.58 | 2.81E-01 | 0.06  | 4.76E-01 | 0.36  | 3.61E-01 |

|            |      |          |       |          |       |          |
|------------|------|----------|-------|----------|-------|----------|
| TFF3       | 0.58 | 2.81E-01 | 2.47  | 6.73E-03 | 0.67  | 2.51E-01 |
| SNRPG      | 0.58 | 2.81E-01 | 0.55  | 2.90E-01 | -0.22 | 5.86E-01 |
| AC007557.1 | 0.58 | 2.81E-01 | 0.15  | 4.39E-01 | 1.28  | 1.01E-01 |
| OR10G7     | 0.58 | 2.81E-01 | 0.56  | 2.86E-01 | -0.25 | 6.00E-01 |
| OR5M1      | 0.58 | 2.81E-01 | 0.43  | 3.34E-01 | -0.79 | 7.85E-01 |
| FMN1       | 0.58 | 2.81E-01 | -0.28 | 6.11E-01 | 0.41  | 3.40E-01 |
| ATP6V1B1   | 0.58 | 2.81E-01 | 0.55  | 2.90E-01 | -0.21 | 5.82E-01 |
| FCER1G     | 0.58 | 2.81E-01 | 0.21  | 4.15E-01 | 0.23  | 4.07E-01 |
| METTL12    | 0.58 | 2.81E-01 | -1.13 | 8.70E-01 | 0.92  | 1.80E-01 |
| SLC7A13    | 0.58 | 2.81E-01 | 0.74  | 2.30E-01 | -0.73 | 7.67E-01 |
| MTRNR2L6   | 0.58 | 2.82E-01 | -0.95 | 8.29E-01 | 0.91  | 1.83E-01 |
| CLPTM1L    | 0.58 | 2.82E-01 | -0.17 | 5.66E-01 | 0.14  | 4.44E-01 |
| FARP2      | 0.58 | 2.82E-01 | -0.55 | 7.07E-01 | 0.04  | 4.86E-01 |
| ACOX2      | 0.58 | 2.82E-01 | 1.23  | 1.09E-01 | -0.19 | 5.76E-01 |
| NPY5R      | 0.58 | 2.82E-01 | -0.02 | 5.07E-01 | 1.38  | 8.42E-02 |
| ART3       | 0.58 | 2.82E-01 | -0.06 | 5.23E-01 | 0.10  | 4.60E-01 |
| ACSS2      | 0.58 | 2.82E-01 | 1.25  | 1.06E-01 | -0.77 | 7.80E-01 |
| CES4A      | 0.58 | 2.82E-01 | -0.50 | 6.91E-01 | 0.55  | 2.92E-01 |
| ARFRP1     | 0.58 | 2.82E-01 | 0.97  | 1.67E-01 | 0.83  | 2.04E-01 |
| C14orf144  | 0.58 | 2.82E-01 | 1.33  | 9.16E-02 | 1.33  | 9.20E-02 |
| E2F6       | 0.58 | 2.82E-01 | 0.30  | 3.83E-01 | -0.54 | 7.07E-01 |
| PGPEP1L    | 0.58 | 2.82E-01 | 1.52  | 6.48E-02 | -1.11 | 8.66E-01 |
| AP3S2      | 0.58 | 2.82E-01 | 0.33  | 3.71E-01 | -0.53 | 7.00E-01 |
| DDX20      | 0.57 | 2.83E-01 | -0.38 | 6.47E-01 | 0.10  | 4.61E-01 |
| SNTG2      | 0.57 | 2.83E-01 | -0.78 | 7.83E-01 | 0.93  | 1.76E-01 |
| HS3ST5     | 0.57 | 2.83E-01 | -0.41 | 6.59E-01 | 2.21  | 1.35E-02 |
| CYP2J2     | 0.57 | 2.83E-01 | 0.25  | 4.00E-01 | -0.34 | 6.33E-01 |
| SLC22A24   | 0.57 | 2.83E-01 | 1.42  | 7.79E-02 | -1.08 | 8.60E-01 |
| FABP3      | 0.57 | 2.83E-01 | -1.23 | 8.91E-01 | 0.72  | 2.35E-01 |
| CLCF1      | 0.57 | 2.83E-01 | 2.26  | 1.19E-02 | 0.45  | 3.25E-01 |
| ARL13B     | 0.57 | 2.83E-01 | -0.31 | 6.21E-01 | 0.03  | 4.89E-01 |

|           |      |          |       |          |       |          |
|-----------|------|----------|-------|----------|-------|----------|
| PHB2      | 0.57 | 2.83E-01 | -1.56 | 9.41E-01 | 1.88  | 3.04E-02 |
| FAM71D    | 0.57 | 2.83E-01 | 0.69  | 2.45E-01 | -0.63 | 7.36E-01 |
| CDCA4     | 0.57 | 2.83E-01 | 1.36  | 8.70E-02 | -1.24 | 8.93E-01 |
| CBX7      | 0.57 | 2.83E-01 | -0.65 | 7.41E-01 | 1.95  | 2.59E-02 |
| KCNA5     | 0.57 | 2.83E-01 | 0.69  | 2.46E-01 | -0.75 | 7.73E-01 |
| FREM3     | 0.57 | 2.83E-01 | 1.19  | 1.17E-01 | 1.54  | 6.19E-02 |
| SP3       | 0.57 | 2.84E-01 | 0.91  | 1.82E-01 | 1.80  | 3.60E-02 |
| THBD      | 0.57 | 2.84E-01 | 0.82  | 2.07E-01 | -0.48 | 6.83E-01 |
| OR5D14    | 0.57 | 2.84E-01 | 0.64  | 2.61E-01 | -0.21 | 5.83E-01 |
| SEC61A1   | 0.57 | 2.84E-01 | -1.46 | 9.27E-01 | 1.08  | 1.40E-01 |
| ARSK      | 0.57 | 2.84E-01 | 0.59  | 2.79E-01 | 0.61  | 2.70E-01 |
| RPRD1B    | 0.57 | 2.84E-01 | 0.22  | 4.13E-01 | -0.26 | 6.04E-01 |
| PRSS58    | 0.57 | 2.84E-01 | -1.12 | 8.68E-01 | 1.09  | 1.37E-01 |
| RAD9A     | 0.57 | 2.84E-01 | 2.07  | 1.94E-02 | 1.49  | 6.81E-02 |
| KRTAP13-1 | 0.57 | 2.84E-01 | -0.74 | 7.71E-01 | 0.90  | 1.83E-01 |
| LRRN1     | 0.57 | 2.84E-01 | 1.45  | 7.31E-02 | 0.22  | 4.14E-01 |
| NR4A1     | 0.57 | 2.84E-01 | -0.74 | 7.69E-01 | 1.66  | 4.86E-02 |
| FAM131A   | 0.57 | 2.84E-01 | -0.39 | 6.52E-01 | 1.09  | 1.37E-01 |
| PCDH7     | 0.57 | 2.84E-01 | 1.52  | 6.40E-02 | -1.31 | 9.05E-01 |
| RPS3      | 0.57 | 2.84E-01 | 0.32  | 3.73E-01 | -0.29 | 6.14E-01 |
| CENPH     | 0.57 | 2.84E-01 | -0.20 | 5.78E-01 | 0.82  | 2.07E-01 |
| UGT2A3    | 0.57 | 2.84E-01 | -0.14 | 5.56E-01 | -0.19 | 5.75E-01 |
| ZNF160    | 0.57 | 2.84E-01 | 0.91  | 1.82E-01 | 0.51  | 3.05E-01 |
| FCHSD1    | 0.57 | 2.84E-01 | 1.87  | 3.08E-02 | 0.36  | 3.60E-01 |
| STK32C    | 0.57 | 2.84E-01 | 0.93  | 1.75E-01 | -1.03 | 8.50E-01 |
| GLTPD2    | 0.57 | 2.84E-01 | -1.86 | 9.69E-01 | 1.04  | 1.50E-01 |
| PRPF38A   | 0.57 | 2.84E-01 | -0.15 | 5.58E-01 | 0.30  | 3.84E-01 |
| MYO9A     | 0.57 | 2.85E-01 | -0.10 | 5.39E-01 | 0.28  | 3.91E-01 |
| GSTK1     | 0.57 | 2.85E-01 | -0.32 | 6.26E-01 | 0.13  | 4.48E-01 |
| ENTPD3    | 0.57 | 2.85E-01 | 1.31  | 9.55E-02 | -0.53 | 7.03E-01 |
| GUCY1A3   | 0.57 | 2.85E-01 | -0.19 | 5.74E-01 | 0.21  | 4.18E-01 |



|          |      |          |       |          |       |          |
|----------|------|----------|-------|----------|-------|----------|
| ZNF544   | 0.57 | 2.85E-01 | 0.34  | 3.66E-01 | -0.78 | 7.83E-01 |
| SAC3D1   | 0.57 | 2.85E-01 | 2.48  | 6.54E-03 | 1.37  | 8.53E-02 |
| TIMP4    | 0.57 | 2.85E-01 | -0.38 | 6.46E-01 | 1.82  | 3.46E-02 |
| AOX1     | 0.57 | 2.85E-01 | 0.81  | 2.09E-01 | 0.08  | 4.68E-01 |
| MMP3     | 0.57 | 2.85E-01 | -0.88 | 8.11E-01 | 0.78  | 2.18E-01 |
| PTP4A3   | 0.57 | 2.85E-01 | 0.46  | 3.24E-01 | -0.32 | 6.27E-01 |
| CARM1    | 0.57 | 2.85E-01 | 1.33  | 9.10E-02 | -1.12 | 8.69E-01 |
| DEFB118  | 0.57 | 2.85E-01 | 1.40  | 8.02E-02 | 1.31  | 9.43E-02 |
| CNNM2    | 0.57 | 2.85E-01 | -0.18 | 5.71E-01 | -0.30 | 6.19E-01 |
| COMMD8   | 0.57 | 2.85E-01 | 0.68  | 2.48E-01 | -0.59 | 7.21E-01 |
| ADAM10   | 0.57 | 2.85E-01 | 0.41  | 3.42E-01 | -0.29 | 6.15E-01 |
| HMG20B   | 0.57 | 2.85E-01 | 0.06  | 4.76E-01 | 0.41  | 3.40E-01 |
| RNF26    | 0.57 | 2.85E-01 | 1.26  | 1.04E-01 | -1.96 | 9.75E-01 |
| NDNL2    | 0.57 | 2.85E-01 | -0.47 | 6.79E-01 | 0.84  | 2.01E-01 |
| GRIA4    | 0.57 | 2.85E-01 | 0.78  | 2.19E-01 | -0.44 | 6.69E-01 |
| OR51J1   | 0.57 | 2.86E-01 | 1.02  | 1.53E-01 | -0.68 | 7.52E-01 |
| ALG11    | 0.57 | 2.86E-01 | 0.19  | 4.23E-01 | 1.62  | 5.28E-02 |
| MYL1     | 0.57 | 2.86E-01 | 1.44  | 7.46E-02 | -1.22 | 8.89E-01 |
| CNIH4    | 0.57 | 2.86E-01 | 0.56  | 2.89E-01 | -0.26 | 6.01E-01 |
| RBM19    | 0.57 | 2.86E-01 | -0.19 | 5.75E-01 | -0.56 | 7.13E-01 |
| ZSCAN21  | 0.57 | 2.86E-01 | 1.34  | 9.07E-02 | 0.99  | 1.61E-01 |
| EPS8L3   | 0.57 | 2.86E-01 | 0.49  | 3.11E-01 | 0.01  | 4.95E-01 |
| KCNK3    | 0.57 | 2.86E-01 | 0.01  | 4.97E-01 | -0.11 | 5.46E-01 |
| DHTKD1   | 0.57 | 2.86E-01 | 1.13  | 1.30E-01 | -1.52 | 9.35E-01 |
| TANGO2   | 0.57 | 2.86E-01 | -0.31 | 6.21E-01 | 0.17  | 4.32E-01 |
| ZKSCAN2  | 0.57 | 2.86E-01 | 0.85  | 1.98E-01 | 0.91  | 1.81E-01 |
| GSDMD    | 0.56 | 2.86E-01 | 0.89  | 1.88E-01 | 0.36  | 3.58E-01 |
| ALPL     | 0.56 | 2.86E-01 | 1.59  | 5.63E-02 | -1.83 | 9.66E-01 |
| PLOD2    | 0.56 | 2.86E-01 | 0.33  | 3.70E-01 | -0.36 | 6.40E-01 |
| SLC25A37 | 0.56 | 2.86E-01 | -0.47 | 6.80E-01 | -0.17 | 5.67E-01 |
| WNK4     | 0.56 | 2.86E-01 | 0.13  | 4.50E-01 | -0.20 | 5.79E-01 |

|              |      |          |       |          |       |          |
|--------------|------|----------|-------|----------|-------|----------|
| CLPTM1       | 0.56 | 2.87E-01 | 0.02  | 4.93E-01 | -0.17 | 5.66E-01 |
| SELO         | 0.56 | 2.87E-01 | 1.27  | 1.03E-01 | -0.48 | 6.84E-01 |
| ADO          | 0.56 | 2.87E-01 | -0.74 | 7.69E-01 | 2.40  | 8.20E-03 |
| AP1S1        | 0.56 | 2.87E-01 | 0.14  | 4.45E-01 | 1.40  | 8.04E-02 |
| NIPA2        | 0.56 | 2.87E-01 | 0.41  | 3.42E-01 | 0.03  | 4.89E-01 |
| SERBP1       | 0.56 | 2.87E-01 | -0.13 | 5.50E-01 | 0.46  | 3.23E-01 |
| TEX33        | 0.56 | 2.87E-01 | 0.82  | 2.06E-01 | -0.82 | 7.95E-01 |
| EEF2         | 0.56 | 2.87E-01 | -0.83 | 7.97E-01 | 0.54  | 2.93E-01 |
| SYS1-DBNDD2  | 0.56 | 2.87E-01 | 0.10  | 4.59E-01 | 0.16  | 4.36E-01 |
| KCNMB4       | 0.56 | 2.87E-01 | 1.21  | 1.13E-01 | 0.57  | 2.83E-01 |
| LRRC2        | 0.56 | 2.87E-01 | -0.10 | 5.41E-01 | -0.56 | 7.12E-01 |
| CD7          | 0.56 | 2.87E-01 | 0.33  | 3.70E-01 | -0.02 | 5.08E-01 |
| SLC35B2      | 0.56 | 2.87E-01 | 0.04  | 4.85E-01 | -0.05 | 5.19E-01 |
| BCL9L        | 0.56 | 2.87E-01 | -0.29 | 6.13E-01 | 1.03  | 1.52E-01 |
| DEPTOR       | 0.56 | 2.87E-01 | -0.42 | 6.64E-01 | -0.03 | 5.11E-01 |
| ZNF677       | 0.56 | 2.87E-01 | 0.65  | 2.57E-01 | -1.17 | 8.79E-01 |
| GPR161       | 0.56 | 2.87E-01 | 0.03  | 4.88E-01 | 0.35  | 3.63E-01 |
| IL1R1        | 0.56 | 2.87E-01 | 0.21  | 4.17E-01 | -0.17 | 5.69E-01 |
| SLC41A3      | 0.56 | 2.87E-01 | 1.52  | 6.42E-02 | 0.15  | 4.40E-01 |
| TTYH3        | 0.56 | 2.88E-01 | 0.37  | 3.57E-01 | 0.33  | 3.72E-01 |
| DCXR         | 0.56 | 2.88E-01 | 1.14  | 1.27E-01 | -1.15 | 8.75E-01 |
| WNT11        | 0.56 | 2.88E-01 | -0.46 | 6.78E-01 | 1.47  | 7.10E-02 |
| ME3          | 0.56 | 2.88E-01 | -1.15 | 8.74E-01 | 0.81  | 2.10E-01 |
| NEDD9        | 0.56 | 2.88E-01 | -0.17 | 5.67E-01 | -0.17 | 5.69E-01 |
| HELB         | 0.56 | 2.88E-01 | -1.47 | 9.29E-01 | 1.03  | 1.52E-01 |
| PTPRK        | 0.56 | 2.88E-01 | 1.42  | 7.72E-02 | -0.22 | 5.88E-01 |
| RMI2         | 0.56 | 2.88E-01 | 0.46  | 3.24E-01 | 0.25  | 4.03E-01 |
| RP11-72304.6 | 0.56 | 2.88E-01 | 1.47  | 7.06E-02 | -0.15 | 5.58E-01 |
| TEX29        | 0.56 | 2.88E-01 | 0.66  | 2.54E-01 | -1.25 | 8.95E-01 |
| ZNF83        | 0.56 | 2.88E-01 | -0.51 | 6.96E-01 | 1.55  | 6.11E-02 |
| SUOX         | 0.56 | 2.88E-01 | 0.36  | 3.58E-01 | 1.83  | 3.34E-02 |

|         |      |          |       |          |       |          |
|---------|------|----------|-------|----------|-------|----------|
| ZNF91   | 0.56 | 2.88E-01 | 0.53  | 3.00E-01 | -1.32 | 9.07E-01 |
| TEX2    | 0.56 | 2.88E-01 | -0.03 | 5.12E-01 | -0.06 | 5.22E-01 |
| ZNF205  | 0.56 | 2.88E-01 | -1.31 | 9.05E-01 | 1.72  | 4.29E-02 |
| SYNM    | 0.56 | 2.88E-01 | -0.24 | 5.96E-01 | 0.17  | 4.32E-01 |
| CARHSP1 | 0.56 | 2.88E-01 | 0.02  | 4.90E-01 | 0.95  | 1.70E-01 |
| ADPRHL1 | 0.56 | 2.89E-01 | -0.42 | 6.63E-01 | 0.03  | 4.87E-01 |
| CCDC18  | 0.56 | 2.89E-01 | 0.43  | 3.33E-01 | 1.55  | 6.05E-02 |
| DENND5A | 0.56 | 2.89E-01 | -0.05 | 5.19E-01 | 0.49  | 3.14E-01 |
| CCDC171 | 0.56 | 2.89E-01 | 0.61  | 2.70E-01 | 0.24  | 4.05E-01 |
| DNAH10  | 0.56 | 2.89E-01 | 0.73  | 2.32E-01 | 1.01  | 1.56E-01 |
| KCNV1   | 0.56 | 2.89E-01 | -0.32 | 6.27E-01 | 0.66  | 2.55E-01 |
| TRIP10  | 0.56 | 2.89E-01 | 1.99  | 2.32E-02 | 0.97  | 1.67E-01 |
| CCNYL1  | 0.56 | 2.89E-01 | -0.67 | 7.50E-01 | 2.11  | 1.73E-02 |
| PTPN14  | 0.56 | 2.89E-01 | 0.43  | 3.34E-01 | 0.62  | 2.66E-01 |
| ZNF774  | 0.56 | 2.89E-01 | -0.07 | 5.28E-01 | 0.43  | 3.33E-01 |
| CCNY    | 0.56 | 2.89E-01 | -0.40 | 6.54E-01 | 1.54  | 6.23E-02 |
| ASIC2   | 0.55 | 2.89E-01 | -0.71 | 7.61E-01 | 1.11  | 1.34E-01 |
| TMEM45A | 0.55 | 2.90E-01 | -0.92 | 8.22E-01 | 1.30  | 9.76E-02 |
| GJB4    | 0.55 | 2.90E-01 | -0.06 | 5.25E-01 | 0.61  | 2.71E-01 |
| ACOT6   | 0.55 | 2.90E-01 | 0.70  | 2.41E-01 | 1.35  | 8.86E-02 |
| SP4     | 0.55 | 2.90E-01 | -0.26 | 6.01E-01 | 0.21  | 4.17E-01 |
| ALG9    | 0.55 | 2.90E-01 | 1.70  | 4.48E-02 | -0.72 | 7.63E-01 |
| PIGZ    | 0.55 | 2.90E-01 | 0.66  | 2.56E-01 | -0.07 | 5.28E-01 |
| CALY    | 0.55 | 2.90E-01 | -1.48 | 9.30E-01 | 2.05  | 2.04E-02 |
| ENTPD5  | 0.55 | 2.90E-01 | -0.19 | 5.77E-01 | 0.00  | 5.02E-01 |
| DCLK1   | 0.55 | 2.90E-01 | -0.45 | 6.74E-01 | 1.36  | 8.63E-02 |
| ABHD4   | 0.55 | 2.90E-01 | -0.11 | 5.44E-01 | 1.50  | 6.66E-02 |
| HTR1B   | 0.55 | 2.90E-01 | -0.63 | 7.37E-01 | 0.32  | 3.76E-01 |
| CD163L1 | 0.55 | 2.90E-01 | 0.94  | 1.74E-01 | 0.27  | 3.94E-01 |
| TMEM75  | 0.55 | 2.90E-01 | -0.24 | 5.95E-01 | 0.27  | 3.95E-01 |
| UQCC1   | 0.55 | 2.90E-01 | -0.14 | 5.56E-01 | -0.19 | 5.75E-01 |

|          |      |          |       |          |       |          |
|----------|------|----------|-------|----------|-------|----------|
| MROH1    | 0.55 | 2.90E-01 | -1.31 | 9.06E-01 | 1.24  | 1.07E-01 |
| PKP3     | 0.55 | 2.91E-01 | -0.57 | 7.16E-01 | 0.98  | 1.64E-01 |
| PHC1     | 0.55 | 2.91E-01 | -0.96 | 8.31E-01 | 0.72  | 2.35E-01 |
| FBXW7    | 0.55 | 2.91E-01 | -0.05 | 5.21E-01 | 0.86  | 1.95E-01 |
| ANTXR1   | 0.55 | 2.91E-01 | 0.27  | 3.95E-01 | 0.91  | 1.81E-01 |
| OR2L5    | 0.55 | 2.91E-01 | -0.62 | 7.32E-01 | 0.85  | 1.98E-01 |
| HDAC1    | 0.55 | 2.91E-01 | -0.28 | 6.12E-01 | 1.29  | 9.80E-02 |
| TTK      | 0.55 | 2.91E-01 | 0.61  | 2.72E-01 | 1.13  | 1.28E-01 |
| LIN7C    | 0.55 | 2.91E-01 | -0.27 | 6.06E-01 | 0.58  | 2.80E-01 |
| ZNF398   | 0.55 | 2.91E-01 | 0.63  | 2.65E-01 | 0.46  | 3.23E-01 |
| PPP1R8   | 0.55 | 2.91E-01 | -0.36 | 6.42E-01 | 0.55  | 2.91E-01 |
| ACIN1    | 0.55 | 2.91E-01 | 0.08  | 4.66E-01 | 0.05  | 4.81E-01 |
| PCCA     | 0.55 | 2.91E-01 | -0.21 | 5.83E-01 | -0.13 | 5.52E-01 |
| KLHDC4   | 0.55 | 2.91E-01 | 0.87  | 1.91E-01 | 0.50  | 3.08E-01 |
| MED31    | 0.55 | 2.91E-01 | 2.10  | 1.79E-02 | -0.79 | 7.86E-01 |
| GLB1L3   | 0.55 | 2.91E-01 | 0.10  | 4.61E-01 | 0.72  | 2.35E-01 |
| LEPRE1   | 0.55 | 2.91E-01 | 0.48  | 3.16E-01 | -1.31 | 9.04E-01 |
| ZFP41    | 0.55 | 2.91E-01 | 0.25  | 4.01E-01 | 2.36  | 9.21E-03 |
| PNRC1    | 0.55 | 2.92E-01 | -1.78 | 9.63E-01 | 0.94  | 1.73E-01 |
| PADI4    | 0.55 | 2.92E-01 | -1.30 | 9.03E-01 | 1.08  | 1.41E-01 |
| ADCY8    | 0.55 | 2.92E-01 | -0.75 | 7.73E-01 | 1.07  | 1.43E-01 |
| NKX1-2   | 0.55 | 2.92E-01 | 0.18  | 4.28E-01 | 1.21  | 1.13E-01 |
| OVOL1    | 0.55 | 2.92E-01 | 0.82  | 2.06E-01 | -1.64 | 9.50E-01 |
| TUBG1    | 0.55 | 2.92E-01 | -0.17 | 5.66E-01 | 0.27  | 3.92E-01 |
| ZNF565   | 0.55 | 2.92E-01 | 1.64  | 5.10E-02 | 0.54  | 2.94E-01 |
| ASB1     | 0.55 | 2.92E-01 | 0.44  | 3.30E-01 | 0.43  | 3.35E-01 |
| SEPHS1   | 0.55 | 2.92E-01 | -0.13 | 5.53E-01 | -0.07 | 5.29E-01 |
| KRTAP9-7 | 0.55 | 2.92E-01 | 0.86  | 1.96E-01 | -1.28 | 9.00E-01 |
| ARTN     | 0.55 | 2.92E-01 | 1.68  | 4.67E-02 | -2.08 | 9.81E-01 |
| RLN1     | 0.55 | 2.92E-01 | -1.03 | 8.48E-01 | 1.32  | 9.33E-02 |
| ATG2A    | 0.55 | 2.92E-01 | -0.83 | 7.96E-01 | 0.62  | 2.69E-01 |

|          |      |          |       |          |       |          |
|----------|------|----------|-------|----------|-------|----------|
| CHAD     | 0.55 | 2.92E-01 | 1.20  | 1.16E-01 | -0.99 | 8.40E-01 |
| AHCY     | 0.55 | 2.92E-01 | -1.78 | 9.62E-01 | 1.53  | 6.24E-02 |
| RASIP1   | 0.55 | 2.92E-01 | -0.22 | 5.87E-01 | 0.23  | 4.09E-01 |
| SPDYC    | 0.55 | 2.92E-01 | 1.51  | 6.53E-02 | -0.92 | 8.21E-01 |
| DENND6B  | 0.55 | 2.92E-01 | -0.37 | 6.43E-01 | 0.65  | 2.57E-01 |
| CCDC89   | 0.55 | 2.92E-01 | 0.76  | 2.25E-01 | -0.31 | 6.21E-01 |
| GPR123   | 0.55 | 2.92E-01 | -0.76 | 7.77E-01 | 0.61  | 2.72E-01 |
| C1orf106 | 0.55 | 2.92E-01 | -0.18 | 5.72E-01 | 0.40  | 3.44E-01 |
| DHRS11   | 0.55 | 2.92E-01 | 0.05  | 4.79E-01 | -0.08 | 5.30E-01 |
| OSR2     | 0.55 | 2.93E-01 | 1.37  | 8.53E-02 | -1.42 | 9.23E-01 |
| CSNK2A3  | 0.55 | 2.93E-01 | -0.49 | 6.88E-01 | 0.69  | 2.45E-01 |
| PRSS56   | 0.55 | 2.93E-01 | -0.28 | 6.11E-01 | -0.17 | 5.66E-01 |
| N6AMT2   | 0.55 | 2.93E-01 | 0.26  | 3.96E-01 | -0.12 | 5.50E-01 |
| RHOBTB2  | 0.55 | 2.93E-01 | -0.64 | 7.39E-01 | 1.33  | 9.25E-02 |
| GPAA1    | 0.55 | 2.93E-01 | 0.45  | 3.27E-01 | -0.27 | 6.06E-01 |
| CYLC2    | 0.54 | 2.93E-01 | -0.36 | 6.41E-01 | 0.68  | 2.49E-01 |
| TDP2     | 0.54 | 2.93E-01 | -0.59 | 7.22E-01 | 0.57  | 2.85E-01 |
| THBS1    | 0.54 | 2.93E-01 | 1.24  | 1.08E-01 | -0.12 | 5.49E-01 |
| SPATA18  | 0.54 | 2.93E-01 | 1.38  | 8.34E-02 | -0.21 | 5.85E-01 |
| TAS2R50  | 0.54 | 2.93E-01 | 1.05  | 1.46E-01 | 0.63  | 2.64E-01 |
| CNTN4    | 0.54 | 2.93E-01 | 0.98  | 1.64E-01 | 0.53  | 2.97E-01 |
| SUN2     | 0.54 | 2.93E-01 | 0.27  | 3.95E-01 | 0.09  | 4.64E-01 |
| OR52R1   | 0.54 | 2.93E-01 | 0.54  | 2.93E-01 | 1.25  | 1.05E-01 |
| CHMP4A   | 0.54 | 2.93E-01 | 0.51  | 3.04E-01 | -0.40 | 6.56E-01 |
| FZD5     | 0.54 | 2.93E-01 | -0.78 | 7.81E-01 | 1.34  | 9.08E-02 |
| HAL      | 0.54 | 2.94E-01 | -1.22 | 8.88E-01 | 0.85  | 1.97E-01 |
| TEX101   | 0.54 | 2.94E-01 | -0.21 | 5.83E-01 | 0.11  | 4.55E-01 |
| TAC3     | 0.54 | 2.94E-01 | -0.22 | 5.86E-01 | 1.44  | 7.47E-02 |
| LAMB4    | 0.54 | 2.94E-01 | 1.11  | 1.33E-01 | 0.46  | 3.22E-01 |
| SLCO4A1  | 0.54 | 2.94E-01 | -0.24 | 5.94E-01 | 1.12  | 1.31E-01 |
| SLC45A3  | 0.54 | 2.94E-01 | -0.54 | 7.05E-01 | 1.80  | 3.56E-02 |

|           |      |          |       |          |       |          |
|-----------|------|----------|-------|----------|-------|----------|
| ZNF217    | 0.54 | 2.94E-01 | 0.47  | 3.19E-01 | -0.40 | 6.54E-01 |
| WDR11     | 0.54 | 2.94E-01 | 0.53  | 2.98E-01 | 0.32  | 3.74E-01 |
| SCIMP     | 0.54 | 2.94E-01 | 0.93  | 1.75E-01 | -1.58 | 9.43E-01 |
| FRMD1     | 0.54 | 2.94E-01 | -1.52 | 9.35E-01 | 0.97  | 1.66E-01 |
| RASGRF1   | 0.54 | 2.94E-01 | -0.04 | 5.17E-01 | 0.11  | 4.57E-01 |
| ANTXR2    | 0.54 | 2.94E-01 | -0.54 | 7.06E-01 | 0.46  | 3.23E-01 |
| MYH13     | 0.54 | 2.94E-01 | 1.86  | 3.15E-02 | -0.52 | 6.98E-01 |
| OXSM      | 0.54 | 2.94E-01 | 1.69  | 4.60E-02 | -1.12 | 8.68E-01 |
| TMEM209   | 0.54 | 2.94E-01 | 1.28  | 9.95E-02 | -2.14 | 9.84E-01 |
| GRSF1     | 0.54 | 2.95E-01 | -0.31 | 6.22E-01 | 0.28  | 3.89E-01 |
| DGKE      | 0.54 | 2.95E-01 | -1.10 | 8.64E-01 | 0.77  | 2.20E-01 |
| RAB40C    | 0.54 | 2.95E-01 | 0.47  | 3.19E-01 | -0.71 | 7.60E-01 |
| ME1       | 0.54 | 2.95E-01 | 2.13  | 1.66E-02 | -0.23 | 5.91E-01 |
| PATE1     | 0.54 | 2.95E-01 | 0.60  | 2.73E-01 | -1.36 | 9.14E-01 |
| SPINT1    | 0.54 | 2.95E-01 | 0.80  | 2.13E-01 | -1.09 | 8.61E-01 |
| ATP6V1E2  | 0.54 | 2.95E-01 | -0.28 | 6.09E-01 | 1.20  | 1.16E-01 |
| PXT1      | 0.54 | 2.95E-01 | 0.26  | 3.96E-01 | 0.33  | 3.69E-01 |
| MYH9      | 0.54 | 2.95E-01 | 1.24  | 1.08E-01 | -1.49 | 9.32E-01 |
| KRTAP22-1 | 0.54 | 2.95E-01 | -1.66 | 9.52E-01 | 1.45  | 7.34E-02 |
| SCEL      | 0.54 | 2.95E-01 | 0.98  | 1.63E-01 | -0.73 | 7.66E-01 |
| ZMYND8    | 0.54 | 2.95E-01 | -0.36 | 6.39E-01 | 0.37  | 3.57E-01 |
| NSA2      | 0.54 | 2.95E-01 | -0.14 | 5.57E-01 | -0.23 | 5.91E-01 |
| PSG9      | 0.54 | 2.96E-01 | 1.58  | 5.72E-02 | 0.53  | 2.99E-01 |
| POU2F2    | 0.54 | 2.96E-01 | 1.13  | 1.30E-01 | -0.65 | 7.41E-01 |
| TRPM7     | 0.54 | 2.96E-01 | 0.18  | 4.30E-01 | -0.72 | 7.65E-01 |
| TYW1      | 0.54 | 2.96E-01 | 1.64  | 5.08E-02 | -0.96 | 8.32E-01 |
| C8orf59   | 0.54 | 2.96E-01 | -0.07 | 5.30E-01 | 0.18  | 4.29E-01 |
| OXA1L     | 0.54 | 2.96E-01 | 0.21  | 4.16E-01 | 0.85  | 1.97E-01 |
| SEC61B    | 0.54 | 2.96E-01 | -0.14 | 5.54E-01 | 0.22  | 4.14E-01 |
| CCDC176   | 0.54 | 2.96E-01 | -0.35 | 6.37E-01 | 0.85  | 1.97E-01 |
| LRRFIP1   | 0.54 | 2.96E-01 | -0.80 | 7.89E-01 | 0.11  | 4.56E-01 |

|          |      |          |       |          |       |          |
|----------|------|----------|-------|----------|-------|----------|
| DPEP1    | 0.54 | 2.96E-01 | -1.25 | 8.95E-01 | 1.18  | 1.19E-01 |
| OR2M4    | 0.54 | 2.96E-01 | -1.10 | 8.64E-01 | 1.02  | 1.53E-01 |
| OGDHL    | 0.54 | 2.96E-01 | 0.56  | 2.88E-01 | -0.77 | 7.80E-01 |
| AIPL1    | 0.54 | 2.96E-01 | 0.68  | 2.47E-01 | 1.41  | 7.88E-02 |
| ASS1     | 0.53 | 2.96E-01 | 0.41  | 3.41E-01 | 0.41  | 3.40E-01 |
| AP3M2    | 0.53 | 2.96E-01 | 0.07  | 4.71E-01 | -0.24 | 5.93E-01 |
| AGAP5    | 0.53 | 2.96E-01 | -0.44 | 6.69E-01 | 0.44  | 3.29E-01 |
| ZBTB17   | 0.53 | 2.96E-01 | -0.91 | 8.19E-01 | -0.18 | 5.72E-01 |
| RMDN1    | 0.53 | 2.97E-01 | 0.93  | 1.76E-01 | -0.62 | 7.33E-01 |
| PTPLAD2  | 0.53 | 2.97E-01 | -0.13 | 5.52E-01 | -0.42 | 6.63E-01 |
| ICA1L    | 0.53 | 2.97E-01 | 0.00  | 4.99E-01 | -0.30 | 6.17E-01 |
| DDAH1    | 0.53 | 2.97E-01 | 0.96  | 1.68E-01 | -0.20 | 5.78E-01 |
| OPTN     | 0.53 | 2.97E-01 | 0.06  | 4.77E-01 | -0.33 | 6.29E-01 |
| HAUS1    | 0.53 | 2.97E-01 | 0.03  | 4.87E-01 | 0.81  | 2.09E-01 |
| ANGEL2   | 0.53 | 2.97E-01 | 0.47  | 3.19E-01 | -0.60 | 7.26E-01 |
| COG6     | 0.53 | 2.97E-01 | 0.88  | 1.89E-01 | -0.96 | 8.30E-01 |
| F10      | 0.53 | 2.97E-01 | 0.57  | 2.85E-01 | -0.41 | 6.59E-01 |
| NAGPA    | 0.53 | 2.97E-01 | -0.53 | 7.01E-01 | 1.09  | 1.38E-01 |
| OLIG2    | 0.53 | 2.97E-01 | 0.03  | 4.88E-01 | -0.63 | 7.35E-01 |
| DNMBP    | 0.53 | 2.97E-01 | 0.48  | 3.16E-01 | 0.04  | 4.83E-01 |
| CTU1     | 0.53 | 2.97E-01 | -0.53 | 7.00E-01 | 0.36  | 3.60E-01 |
| POLR2I   | 0.53 | 2.97E-01 | 0.50  | 3.08E-01 | -1.05 | 8.53E-01 |
| DIO3     | 0.53 | 2.97E-01 | 2.12  | 1.71E-02 | 0.45  | 3.27E-01 |
| RASSF1   | 0.53 | 2.97E-01 | 1.65  | 4.99E-02 | -1.63 | 9.48E-01 |
| WLS      | 0.53 | 2.97E-01 | 0.89  | 1.86E-01 | 0.13  | 4.47E-01 |
| CFTR     | 0.53 | 2.97E-01 | 0.22  | 4.13E-01 | 0.88  | 1.88E-01 |
| C11orf49 | 0.53 | 2.97E-01 | 0.11  | 4.56E-01 | -0.03 | 5.14E-01 |
| OR5K1    | 0.53 | 2.97E-01 | 1.01  | 1.56E-01 | -0.15 | 5.58E-01 |
| GMPR2    | 0.53 | 2.97E-01 | -0.07 | 5.27E-01 | -0.07 | 5.26E-01 |
| RAPGEF5  | 0.53 | 2.97E-01 | 0.74  | 2.31E-01 | -0.29 | 6.14E-01 |
| RAD1     | 0.53 | 2.97E-01 | 1.59  | 5.60E-02 | -1.70 | 9.56E-01 |

|         |      |          |       |          |       |          |
|---------|------|----------|-------|----------|-------|----------|
| FOPNL   | 0.53 | 2.97E-01 | 1.33  | 9.10E-02 | -0.37 | 6.46E-01 |
| DBX1    | 0.53 | 2.97E-01 | 0.17  | 4.33E-01 | -0.03 | 5.13E-01 |
| HIST4H4 | 0.53 | 2.97E-01 | -0.87 | 8.08E-01 | 1.79  | 3.66E-02 |
| CBLC    | 0.53 | 2.97E-01 | 0.61  | 2.71E-01 | 1.63  | 5.13E-02 |
| CA12    | 0.53 | 2.97E-01 | -0.33 | 6.29E-01 | 0.12  | 4.51E-01 |
| PEX2    | 0.53 | 2.97E-01 | -0.19 | 5.75E-01 | -0.10 | 5.39E-01 |
| OCA2    | 0.53 | 2.98E-01 | -0.52 | 6.97E-01 | 0.40  | 3.46E-01 |
| ZNF729  | 0.53 | 2.98E-01 | 0.55  | 2.93E-01 | -0.40 | 6.56E-01 |
| GUCA2B  | 0.53 | 2.98E-01 | -1.08 | 8.59E-01 | 0.31  | 3.77E-01 |
| UBXN7   | 0.53 | 2.98E-01 | -0.71 | 7.62E-01 | 0.70  | 2.41E-01 |
| RPF2    | 0.53 | 2.98E-01 | -0.34 | 6.32E-01 | 0.82  | 2.06E-01 |
| GRIK3   | 0.53 | 2.98E-01 | 2.10  | 1.79E-02 | 0.96  | 1.70E-01 |
| LILRA1  | 0.53 | 2.98E-01 | 0.11  | 4.57E-01 | 1.04  | 1.49E-01 |
| IFI27   | 0.53 | 2.98E-01 | -1.86 | 9.69E-01 | 1.78  | 3.77E-02 |
| TIGD4   | 0.53 | 2.98E-01 | -1.21 | 8.88E-01 | 0.50  | 3.07E-01 |
| DIRAS3  | 0.53 | 2.98E-01 | 1.33  | 9.21E-02 | -1.40 | 9.19E-01 |
| PTH1R   | 0.53 | 2.98E-01 | -0.96 | 8.32E-01 | 1.12  | 1.31E-01 |
| CCL26   | 0.53 | 2.98E-01 | -1.18 | 8.82E-01 | 1.36  | 8.72E-02 |
| RNF222  | 0.53 | 2.98E-01 | 0.83  | 2.03E-01 | -0.14 | 5.57E-01 |
| ITIH3   | 0.53 | 2.99E-01 | -0.22 | 5.86E-01 | -0.54 | 7.06E-01 |
| NGLY1   | 0.53 | 2.99E-01 | 1.64  | 5.09E-02 | -0.79 | 7.85E-01 |
| PSMC3IP | 0.53 | 2.99E-01 | -0.10 | 5.39E-01 | 0.18  | 4.30E-01 |
| ARL4A   | 0.53 | 2.99E-01 | 0.03  | 4.87E-01 | -0.55 | 7.07E-01 |
| GPRC5C  | 0.53 | 2.99E-01 | 0.08  | 4.68E-01 | 1.22  | 1.12E-01 |
| GATS    | 0.53 | 2.99E-01 | -0.78 | 7.83E-01 | 0.23  | 4.08E-01 |
| CYP46A1 | 0.53 | 2.99E-01 | 0.11  | 4.57E-01 | 0.51  | 3.07E-01 |
| C7orf33 | 0.53 | 2.99E-01 | 1.61  | 5.41E-02 | -0.49 | 6.89E-01 |
| KLHDC10 | 0.53 | 2.99E-01 | 0.53  | 2.98E-01 | -0.65 | 7.42E-01 |
| RAB5A   | 0.53 | 2.99E-01 | 0.43  | 3.35E-01 | 1.03  | 1.51E-01 |
| CD93    | 0.53 | 2.99E-01 | 1.87  | 3.04E-02 | -1.51 | 9.35E-01 |
| SETDB2  | 0.53 | 2.99E-01 | 0.44  | 3.30E-01 | 0.61  | 2.71E-01 |



|         |      |          |       |          |       |          |
|---------|------|----------|-------|----------|-------|----------|
| LARS2   | 0.53 | 2.99E-01 | 1.15  | 1.26E-01 | -1.74 | 9.59E-01 |
| FAM46C  | 0.53 | 2.99E-01 | 0.18  | 4.28E-01 | -0.68 | 7.51E-01 |
| FERMT1  | 0.53 | 2.99E-01 | -0.79 | 7.84E-01 | 0.81  | 2.09E-01 |
| SCN10A  | 0.53 | 2.99E-01 | 1.52  | 6.38E-02 | -1.17 | 8.79E-01 |
| GABBR1  | 0.53 | 2.99E-01 | 0.40  | 3.43E-01 | 1.29  | 9.90E-02 |
| CDKN1C  | 0.53 | 3.00E-01 | 0.81  | 2.09E-01 | -1.89 | 9.70E-01 |
| RBMXL2  | 0.53 | 3.00E-01 | 0.82  | 2.05E-01 | -1.46 | 9.27E-01 |
| SYPL1   | 0.53 | 3.00E-01 | -0.73 | 7.67E-01 | 0.67  | 2.53E-01 |
| SH2D5   | 0.53 | 3.00E-01 | 0.14  | 4.43E-01 | -0.51 | 6.94E-01 |
| LCMT2   | 0.53 | 3.00E-01 | 0.37  | 3.57E-01 | 1.30  | 9.72E-02 |
| GSK3A   | 0.53 | 3.00E-01 | 0.83  | 2.02E-01 | 0.77  | 2.22E-01 |
| PDZD2   | 0.52 | 3.00E-01 | 0.20  | 4.19E-01 | 0.21  | 4.15E-01 |
| PPL     | 0.52 | 3.00E-01 | 0.78  | 2.19E-01 | 0.73  | 2.33E-01 |
| TMEM37  | 0.52 | 3.00E-01 | 0.32  | 3.75E-01 | -0.14 | 5.57E-01 |
| MAP2    | 0.52 | 3.00E-01 | 1.61  | 5.34E-02 | -0.71 | 7.60E-01 |
| CCT4    | 0.52 | 3.00E-01 | 0.03  | 4.86E-01 | 0.29  | 3.85E-01 |
| TFAP2A  | 0.52 | 3.00E-01 | 0.59  | 2.77E-01 | -0.87 | 8.09E-01 |
| MFSD8   | 0.52 | 3.00E-01 | 0.51  | 3.05E-01 | 0.17  | 4.31E-01 |
| NDUFA3  | 0.52 | 3.00E-01 | -0.22 | 5.88E-01 | 0.08  | 4.66E-01 |
| RCSD1   | 0.52 | 3.00E-01 | -0.07 | 5.27E-01 | -0.69 | 7.54E-01 |
| KIR3DX1 | 0.52 | 3.00E-01 | -0.52 | 6.97E-01 | 0.54  | 2.93E-01 |
| CXCL11  | 0.52 | 3.00E-01 | -0.15 | 5.60E-01 | 0.39  | 3.49E-01 |
| AGL     | 0.52 | 3.00E-01 | 0.20  | 4.21E-01 | -1.02 | 8.46E-01 |
| SOBP    | 0.52 | 3.00E-01 | -0.23 | 5.90E-01 | -0.04 | 5.18E-01 |
| CAPN9   | 0.52 | 3.00E-01 | -0.19 | 5.75E-01 | 1.46  | 7.28E-02 |
| EIF5    | 0.52 | 3.00E-01 | -0.93 | 8.23E-01 | 0.95  | 1.70E-01 |
| CCDC172 | 0.52 | 3.01E-01 | -0.26 | 6.02E-01 | 0.76  | 2.25E-01 |
| SPATA9  | 0.52 | 3.01E-01 | 0.14  | 4.42E-01 | 0.58  | 2.81E-01 |
| TMEM211 | 0.52 | 3.01E-01 | 0.33  | 3.69E-01 | -0.22 | 5.86E-01 |
| GENE    | 0.52 | 3.01E-01 | -0.59 | 7.23E-01 | 0.08  | 4.69E-01 |
| B4GALT4 | 0.52 | 3.01E-01 | 0.86  | 1.94E-01 | -0.97 | 8.33E-01 |

|          |      |          |       |          |       |          |
|----------|------|----------|-------|----------|-------|----------|
| IFT74    | 0.52 | 3.01E-01 | 0.91  | 1.80E-01 | -0.16 | 5.62E-01 |
| DDC8     | 0.52 | 3.01E-01 | 0.20  | 4.20E-01 | 0.42  | 3.39E-01 |
| NDRG1    | 0.52 | 3.01E-01 | -0.57 | 7.15E-01 | 0.76  | 2.24E-01 |
| KCNB2    | 0.52 | 3.01E-01 | -0.64 | 7.38E-01 | 1.12  | 1.31E-01 |
| FAHD2A   | 0.52 | 3.01E-01 | 0.12  | 4.53E-01 | 0.36  | 3.60E-01 |
| TUBB4A   | 0.52 | 3.01E-01 | -0.13 | 5.50E-01 | 0.23  | 4.10E-01 |
| ECHS1    | 0.52 | 3.01E-01 | -1.07 | 8.58E-01 | 2.35  | 9.42E-03 |
| KIF5C    | 0.52 | 3.01E-01 | -0.27 | 6.08E-01 | 0.45  | 3.27E-01 |
| TDRD12   | 0.52 | 3.01E-01 | 1.18  | 1.20E-01 | 0.22  | 4.13E-01 |
| YTHDF3   | 0.52 | 3.01E-01 | 0.25  | 4.00E-01 | 0.00  | 5.00E-01 |
| CD27     | 0.52 | 3.01E-01 | -0.03 | 5.14E-01 | -0.31 | 6.23E-01 |
| ERN1     | 0.52 | 3.01E-01 | 1.11  | 1.34E-01 | -0.99 | 8.38E-01 |
| FEM1B    | 0.52 | 3.01E-01 | 0.79  | 2.14E-01 | -0.17 | 5.68E-01 |
| MKRN1    | 0.52 | 3.01E-01 | 0.35  | 3.63E-01 | -0.02 | 5.09E-01 |
| FSD1L    | 0.52 | 3.02E-01 | 0.76  | 2.23E-01 | -0.31 | 6.23E-01 |
| CPNE3    | 0.52 | 3.02E-01 | 0.73  | 2.32E-01 | -0.61 | 7.29E-01 |
| C11orf52 | 0.52 | 3.02E-01 | 1.15  | 1.26E-01 | -1.01 | 8.44E-01 |
| GAR1     | 0.52 | 3.02E-01 | -0.33 | 6.31E-01 | 0.57  | 2.86E-01 |
| PPP1R16B | 0.52 | 3.02E-01 | 2.08  | 1.86E-02 | 4.51  | 3.18E-06 |
| DNAJC17  | 0.52 | 3.02E-01 | 0.88  | 1.90E-01 | -1.16 | 8.77E-01 |
| IL24     | 0.52 | 3.02E-01 | 0.87  | 1.91E-01 | 0.01  | 4.95E-01 |
| SPDL1    | 0.52 | 3.02E-01 | 0.16  | 4.36E-01 | -0.51 | 6.93E-01 |
| RNASEK   | 0.52 | 3.02E-01 | 0.21  | 4.16E-01 | 0.24  | 4.06E-01 |
| PPIL1    | 0.52 | 3.02E-01 | -0.38 | 6.47E-01 | -0.19 | 5.74E-01 |
| C1orf186 | 0.52 | 3.02E-01 | -0.37 | 6.45E-01 | 0.40  | 3.44E-01 |
| NUTF2    | 0.52 | 3.02E-01 | -0.16 | 5.63E-01 | 1.58  | 5.73E-02 |
| ATP4A    | 0.52 | 3.02E-01 | -0.13 | 5.52E-01 | 0.40  | 3.43E-01 |
| PHGR1    | 0.52 | 3.03E-01 | 1.25  | 1.07E-01 | -0.32 | 6.24E-01 |
| XYLT2    | 0.52 | 3.03E-01 | 0.33  | 3.69E-01 | -0.83 | 7.96E-01 |
| GINS4    | 0.52 | 3.03E-01 | 0.05  | 4.82E-01 | -0.80 | 7.87E-01 |
| C21orf2  | 0.52 | 3.03E-01 | 1.09  | 1.39E-01 | -0.05 | 5.21E-01 |

|          |      |          |       |          |       |          |
|----------|------|----------|-------|----------|-------|----------|
| GSKIP    | 0.52 | 3.03E-01 | 0.32  | 3.74E-01 | 1.05  | 1.47E-01 |
| COLEC11  | 0.52 | 3.03E-01 | 0.35  | 3.64E-01 | 0.65  | 2.57E-01 |
| SUCLA2   | 0.52 | 3.03E-01 | -0.88 | 8.12E-01 | 0.91  | 1.81E-01 |
| PJA2     | 0.52 | 3.03E-01 | -0.12 | 5.50E-01 | -0.16 | 5.64E-01 |
| DDX1     | 0.52 | 3.03E-01 | 0.35  | 3.63E-01 | -0.09 | 5.35E-01 |
| AGBL3    | 0.52 | 3.03E-01 | -1.02 | 8.46E-01 | 1.03  | 1.51E-01 |
| HPGDS    | 0.52 | 3.03E-01 | 0.36  | 3.60E-01 | 1.58  | 5.66E-02 |
| METTL24  | 0.52 | 3.03E-01 | 1.09  | 1.38E-01 | -1.10 | 8.65E-01 |
| NLRP7    | 0.51 | 3.03E-01 | -0.82 | 7.95E-01 | 1.41  | 7.99E-02 |
| POLR3GL  | 0.51 | 3.03E-01 | -0.24 | 5.97E-01 | 0.49  | 3.13E-01 |
| FAR2     | 0.51 | 3.04E-01 | -0.22 | 5.88E-01 | 0.26  | 3.98E-01 |
| RAB19    | 0.51 | 3.04E-01 | -0.15 | 5.61E-01 | 0.25  | 4.01E-01 |
| SRCAP    | 0.51 | 3.04E-01 | 0.47  | 3.21E-01 | -0.01 | 5.02E-01 |
| DCAF12   | 0.51 | 3.04E-01 | 1.56  | 5.89E-02 | 0.42  | 3.36E-01 |
| PLAA     | 0.51 | 3.04E-01 | 1.21  | 1.13E-01 | -0.27 | 6.08E-01 |
| BTBD8    | 0.51 | 3.04E-01 | 0.60  | 2.74E-01 | -0.57 | 7.14E-01 |
| OXR1     | 0.51 | 3.04E-01 | 0.17  | 4.31E-01 | 0.27  | 3.95E-01 |
| GNAQ     | 0.51 | 3.04E-01 | -0.39 | 6.50E-01 | 0.86  | 1.94E-01 |
| PAQR6    | 0.51 | 3.04E-01 | 0.91  | 1.81E-01 | -0.45 | 6.75E-01 |
| NUDT15   | 0.51 | 3.04E-01 | -1.12 | 8.69E-01 | 1.52  | 6.40E-02 |
| CTNND1   | 0.51 | 3.04E-01 | 0.84  | 2.00E-01 | 0.40  | 3.46E-01 |
| KRTAP9-9 | 0.51 | 3.04E-01 | 0.80  | 2.13E-01 | -1.24 | 8.92E-01 |
| SRMS     | 0.51 | 3.04E-01 | 0.59  | 2.76E-01 | 1.58  | 5.73E-02 |
| SLIT3    | 0.51 | 3.04E-01 | -0.79 | 7.86E-01 | 0.15  | 4.41E-01 |
| KRT12    | 0.51 | 3.04E-01 | 0.37  | 3.57E-01 | 0.32  | 3.73E-01 |
| ARL2BP   | 0.51 | 3.05E-01 | 0.57  | 2.86E-01 | -0.97 | 8.35E-01 |
| RPS6KA1  | 0.51 | 3.05E-01 | 0.19  | 4.26E-01 | -0.47 | 6.82E-01 |
| NUP43    | 0.51 | 3.05E-01 | -0.59 | 7.21E-01 | 0.57  | 2.83E-01 |
| MUC8     | 0.51 | 3.05E-01 | 0.74  | 2.31E-01 | -0.22 | 5.86E-01 |
| ARID3C   | 0.51 | 3.05E-01 | 0.54  | 2.95E-01 | 0.26  | 3.97E-01 |
| CBX5     | 0.51 | 3.05E-01 | -0.29 | 6.13E-01 | 0.58  | 2.82E-01 |

|               |      |          |       |          |       |          |
|---------------|------|----------|-------|----------|-------|----------|
| ZNHIT3        | 0.51 | 3.05E-01 | -0.51 | 6.94E-01 | 0.41  | 3.41E-01 |
| RNF167        | 0.51 | 3.05E-01 | 1.16  | 1.23E-01 | 0.83  | 2.03E-01 |
| TUBGCP2       | 0.51 | 3.05E-01 | -0.43 | 6.66E-01 | 2.01  | 2.24E-02 |
| SNX18         | 0.51 | 3.05E-01 | 0.78  | 2.19E-01 | -0.48 | 6.83E-01 |
| ATP7B         | 0.51 | 3.05E-01 | 0.33  | 3.72E-01 | 2.47  | 6.70E-03 |
| PRR14         | 0.51 | 3.05E-01 | 0.37  | 3.56E-01 | -0.23 | 5.89E-01 |
| GZMH          | 0.51 | 3.05E-01 | 0.28  | 3.91E-01 | 0.16  | 4.36E-01 |
| ERLEC1        | 0.51 | 3.05E-01 | 0.32  | 3.75E-01 | -0.54 | 7.07E-01 |
| ATP5J2-PTCD1  | 0.51 | 3.05E-01 | -0.21 | 5.83E-01 | -0.07 | 5.30E-01 |
| OR4K15        | 0.51 | 3.05E-01 | 0.18  | 4.28E-01 | -0.02 | 5.10E-01 |
| DNTT          | 0.51 | 3.06E-01 | 0.42  | 3.37E-01 | -0.66 | 7.45E-01 |
| ZP1           | 0.51 | 3.06E-01 | -0.59 | 7.22E-01 | 0.54  | 2.95E-01 |
| PURG          | 0.51 | 3.06E-01 | -0.11 | 5.43E-01 | 0.11  | 4.56E-01 |
| KHSRP         | 0.51 | 3.06E-01 | -0.86 | 8.06E-01 | 0.91  | 1.83E-01 |
| CCNE1         | 0.51 | 3.06E-01 | 0.75  | 2.28E-01 | -0.30 | 6.19E-01 |
| HEPACAM       | 0.51 | 3.06E-01 | 0.03  | 4.89E-01 | 0.04  | 4.83E-01 |
| C3orf70       | 0.51 | 3.06E-01 | 0.16  | 4.35E-01 | 1.04  | 1.50E-01 |
| TLR4          | 0.51 | 3.06E-01 | -0.54 | 7.06E-01 | 2.81  | 2.47E-03 |
| SMO           | 0.51 | 3.06E-01 | 1.18  | 1.20E-01 | 1.12  | 1.32E-01 |
| PRB1          | 0.51 | 3.06E-01 | 0.58  | 2.81E-01 | -0.71 | 7.60E-01 |
| KRT6B         | 0.51 | 3.06E-01 | -0.04 | 5.14E-01 | 1.56  | 5.93E-02 |
| PIK3R2        | 0.51 | 3.06E-01 | 0.92  | 1.79E-01 | 0.84  | 1.99E-01 |
| CRX           | 0.51 | 3.06E-01 | 2.06  | 1.98E-02 | -0.25 | 5.98E-01 |
| STAG1         | 0.51 | 3.06E-01 | 1.08  | 1.41E-01 | -0.44 | 6.69E-01 |
| NECAB2        | 0.51 | 3.06E-01 | 0.81  | 2.08E-01 | -0.69 | 7.55E-01 |
| OR7C1         | 0.51 | 3.06E-01 | 0.98  | 1.64E-01 | 2.68  | 3.70E-03 |
| RP11-676J12.7 | 0.51 | 3.06E-01 | -1.33 | 9.09E-01 | 1.26  | 1.04E-01 |
| RAB3A         | 0.51 | 3.06E-01 | 1.50  | 6.71E-02 | -0.45 | 6.74E-01 |
| SRSF11        | 0.51 | 3.06E-01 | -0.19 | 5.76E-01 | 0.25  | 4.02E-01 |
| C19orf45      | 0.51 | 3.07E-01 | 1.25  | 1.06E-01 | -0.80 | 7.88E-01 |
| ABCD2         | 0.51 | 3.07E-01 | 0.01  | 4.96E-01 | -0.06 | 5.24E-01 |

|          |      |          |       |          |       |          |
|----------|------|----------|-------|----------|-------|----------|
| GCNT2    | 0.51 | 3.07E-01 | 1.19  | 1.17E-01 | -0.19 | 5.77E-01 |
| PPP2R1A  | 0.51 | 3.07E-01 | 0.57  | 2.86E-01 | -1.29 | 9.01E-01 |
| INSL3    | 0.51 | 3.07E-01 | 1.56  | 5.99E-02 | -1.35 | 9.12E-01 |
| BIRC5    | 0.51 | 3.07E-01 | 1.31  | 9.58E-02 | -0.72 | 7.65E-01 |
| SART1    | 0.51 | 3.07E-01 | -0.20 | 5.79E-01 | -0.01 | 5.06E-01 |
| DMWD     | 0.50 | 3.07E-01 | 0.24  | 4.04E-01 | 0.46  | 3.24E-01 |
| C19orf83 | 0.50 | 3.07E-01 | -0.68 | 7.52E-01 | 0.25  | 4.03E-01 |
| C1orf64  | 0.50 | 3.07E-01 | -0.33 | 6.31E-01 | 0.16  | 4.36E-01 |
| DNAJA3   | 0.50 | 3.07E-01 | 0.60  | 2.74E-01 | 0.18  | 4.27E-01 |
| MDGA1    | 0.50 | 3.07E-01 | 0.04  | 4.86E-01 | -0.25 | 5.98E-01 |
| TAS2R9   | 0.50 | 3.07E-01 | -0.04 | 5.14E-01 | 0.18  | 4.28E-01 |
| LRRC43   | 0.50 | 3.07E-01 | 0.42  | 3.37E-01 | -0.88 | 8.10E-01 |
| LILRA2   | 0.50 | 3.08E-01 | 0.20  | 4.22E-01 | 1.12  | 1.31E-01 |
| SLC31A2  | 0.50 | 3.08E-01 | 0.13  | 4.47E-01 | 0.57  | 2.85E-01 |
| RAD54L   | 0.50 | 3.08E-01 | 0.26  | 3.98E-01 | 0.73  | 2.31E-01 |
| TLDC1    | 0.50 | 3.08E-01 | 0.85  | 1.99E-01 | -1.32 | 9.07E-01 |
| AP5S1    | 0.50 | 3.08E-01 | -0.89 | 8.14E-01 | 0.73  | 2.32E-01 |
| PFDN6    | 0.50 | 3.08E-01 | 0.80  | 2.12E-01 | 0.39  | 3.47E-01 |
| DOCK4    | 0.50 | 3.08E-01 | 0.11  | 4.57E-01 | 1.47  | 7.14E-02 |
| PLEKHA6  | 0.50 | 3.08E-01 | -0.09 | 5.34E-01 | 0.62  | 2.68E-01 |
| SMTNL2   | 0.50 | 3.08E-01 | 0.97  | 1.66E-01 | 0.70  | 2.41E-01 |
| PDP2     | 0.50 | 3.08E-01 | 0.02  | 4.93E-01 | 0.77  | 2.20E-01 |
| KRT85    | 0.50 | 3.08E-01 | 0.11  | 4.58E-01 | -0.02 | 5.07E-01 |
| ATAD3C   | 0.50 | 3.08E-01 | 0.06  | 4.74E-01 | -0.03 | 5.12E-01 |
| C1orf116 | 0.50 | 3.08E-01 | 1.47  | 7.05E-02 | -0.82 | 7.95E-01 |
| SLC5A8   | 0.50 | 3.08E-01 | -0.09 | 5.34E-01 | 0.07  | 4.74E-01 |
| TBC1D10B | 0.50 | 3.08E-01 | 0.49  | 3.11E-01 | -0.67 | 7.48E-01 |
| MYOZ1    | 0.50 | 3.08E-01 | -0.18 | 5.73E-01 | 0.06  | 4.78E-01 |
| GDF5     | 0.50 | 3.08E-01 | -0.29 | 6.15E-01 | -0.40 | 6.55E-01 |
| C15orf40 | 0.50 | 3.08E-01 | -0.93 | 8.23E-01 | 2.17  | 1.50E-02 |
| EXT2     | 0.50 | 3.09E-01 | 0.37  | 3.55E-01 | 0.49  | 3.11E-01 |

|           |      |          |       |          |       |          |
|-----------|------|----------|-------|----------|-------|----------|
| BABAM1    | 0.50 | 3.09E-01 | 0.59  | 2.78E-01 | 0.17  | 4.32E-01 |
| GMFG      | 0.50 | 3.09E-01 | -0.69 | 7.56E-01 | 1.12  | 1.32E-01 |
| DCLK2     | 0.50 | 3.09E-01 | 0.39  | 3.49E-01 | -1.03 | 8.48E-01 |
| ALG9      | 0.50 | 3.09E-01 | 1.66  | 4.88E-02 | -0.69 | 7.54E-01 |
| IL18BP    | 0.50 | 3.09E-01 | 0.34  | 3.66E-01 | 0.05  | 4.81E-01 |
| TRAPPC1   | 0.50 | 3.09E-01 | 0.37  | 3.56E-01 | 0.14  | 4.44E-01 |
| HTR5A-AS1 | 0.50 | 3.09E-01 | 0.99  | 1.61E-01 | -0.81 | 7.90E-01 |
| WDR5      | 0.50 | 3.09E-01 | -0.07 | 5.27E-01 | -0.58 | 7.19E-01 |
| PIK3R3    | 0.50 | 3.09E-01 | 1.54  | 6.22E-02 | -1.50 | 9.33E-01 |
| SNX5      | 0.50 | 3.09E-01 | 0.41  | 3.41E-01 | -0.35 | 6.36E-01 |
| OCM       | 0.50 | 3.09E-01 | -0.67 | 7.49E-01 | 2.21  | 1.35E-02 |
| PLEKHF1   | 0.50 | 3.09E-01 | 1.14  | 1.27E-01 | -0.09 | 5.34E-01 |
| SWT1      | 0.50 | 3.10E-01 | 0.76  | 2.24E-01 | -0.16 | 5.65E-01 |
| EBF2      | 0.50 | 3.10E-01 | 1.16  | 1.23E-01 | 0.30  | 3.83E-01 |
| PARD6A    | 0.50 | 3.10E-01 | 0.26  | 3.97E-01 | 2.19  | 1.43E-02 |
| STAP2     | 0.50 | 3.10E-01 | -0.29 | 6.13E-01 | -0.07 | 5.28E-01 |
| CNOT1     | 0.50 | 3.10E-01 | 0.04  | 4.85E-01 | 1.16  | 1.23E-01 |
| IK        | 0.50 | 3.10E-01 | -0.18 | 5.70E-01 | 0.25  | 4.02E-01 |
| CRNKL1    | 0.50 | 3.10E-01 | 0.75  | 2.26E-01 | -0.76 | 7.77E-01 |
| EMC4      | 0.50 | 3.10E-01 | -0.44 | 6.70E-01 | 0.00  | 4.98E-01 |
| ALG5      | 0.50 | 3.10E-01 | 0.05  | 4.78E-01 | -0.94 | 8.27E-01 |
| MRGPRD    | 0.50 | 3.10E-01 | -0.06 | 5.26E-01 | 0.27  | 3.92E-01 |
| TICAM1    | 0.50 | 3.10E-01 | 0.39  | 3.49E-01 | -0.26 | 6.01E-01 |
| GPR116    | 0.50 | 3.10E-01 | -0.55 | 7.08E-01 | -0.19 | 5.74E-01 |
| CYP4Z1    | 0.50 | 3.10E-01 | 0.76  | 2.23E-01 | -1.68 | 9.53E-01 |
| ZSCAN18   | 0.50 | 3.10E-01 | 0.58  | 2.82E-01 | 0.42  | 3.38E-01 |
| RAB3GAP2  | 0.50 | 3.10E-01 | -0.39 | 6.52E-01 | -0.06 | 5.22E-01 |
| DSG1      | 0.50 | 3.10E-01 | 0.21  | 4.16E-01 | -0.46 | 6.77E-01 |
| PIGQ      | 0.49 | 3.10E-01 | 0.36  | 3.60E-01 | -0.30 | 6.19E-01 |
| LYVE1     | 0.49 | 3.11E-01 | 0.75  | 2.26E-01 | 1.21  | 1.13E-01 |
| PER3      | 0.49 | 3.11E-01 | 0.62  | 2.68E-01 | -0.47 | 6.82E-01 |

|          |      |          |       |          |       |          |
|----------|------|----------|-------|----------|-------|----------|
| PPP1R21  | 0.49 | 3.11E-01 | 1.09  | 1.37E-01 | -0.29 | 6.13E-01 |
| GRK7     | 0.49 | 3.11E-01 | 1.43  | 7.64E-02 | -0.87 | 8.08E-01 |
| GSC      | 0.49 | 3.11E-01 | 0.78  | 2.17E-01 | -0.82 | 7.93E-01 |
| CALM1    | 0.49 | 3.11E-01 | -0.05 | 5.18E-01 | -0.83 | 7.96E-01 |
| RFX2     | 0.49 | 3.11E-01 | 1.67  | 4.75E-02 | -1.02 | 8.46E-01 |
| RSC1A1   | 0.49 | 3.11E-01 | -0.05 | 5.21E-01 | 0.10  | 4.60E-01 |
| NACA     | 0.49 | 3.11E-01 | 0.73  | 2.32E-01 | -1.31 | 9.05E-01 |
| MAPK13   | 0.49 | 3.11E-01 | 1.06  | 1.45E-01 | -1.35 | 9.12E-01 |
| SLC29A3  | 0.49 | 3.11E-01 | 0.77  | 2.21E-01 | -0.15 | 5.61E-01 |
| GNPDA2   | 0.49 | 3.11E-01 | 0.33  | 3.69E-01 | -0.30 | 6.17E-01 |
| OXCT1    | 0.49 | 3.11E-01 | 1.60  | 5.47E-02 | -0.50 | 6.92E-01 |
| UBQLN3   | 0.49 | 3.11E-01 | 0.31  | 3.77E-01 | -0.41 | 6.58E-01 |
| SRRM2    | 0.49 | 3.11E-01 | 0.02  | 4.91E-01 | -0.54 | 7.06E-01 |
| ZNF845   | 0.49 | 3.12E-01 | -0.14 | 5.54E-01 | 0.63  | 2.63E-01 |
| MAPK9    | 0.49 | 3.12E-01 | -0.39 | 6.53E-01 | 0.81  | 2.08E-01 |
| ZNF445   | 0.49 | 3.12E-01 | -0.52 | 7.00E-01 | 0.76  | 2.25E-01 |
| CUL3     | 0.49 | 3.12E-01 | 1.20  | 1.16E-01 | -0.61 | 7.29E-01 |
| COP55    | 0.49 | 3.12E-01 | 0.17  | 4.32E-01 | -0.31 | 6.22E-01 |
| PDLIM1   | 0.49 | 3.12E-01 | 1.25  | 1.06E-01 | -1.82 | 9.65E-01 |
| INCENP   | 0.49 | 3.12E-01 | 1.43  | 7.66E-02 | 0.07  | 4.72E-01 |
| OR2AK2   | 0.49 | 3.12E-01 | 0.58  | 2.82E-01 | -1.14 | 8.72E-01 |
| TRAF3IP1 | 0.49 | 3.12E-01 | 0.35  | 3.64E-01 | -0.08 | 5.31E-01 |
| WFDC3    | 0.49 | 3.12E-01 | 0.46  | 3.22E-01 | 0.40  | 3.46E-01 |
| GTPBP8   | 0.49 | 3.12E-01 | 0.36  | 3.61E-01 | -0.96 | 8.31E-01 |
| EDEM1    | 0.49 | 3.12E-01 | 1.23  | 1.09E-01 | -0.37 | 6.45E-01 |
| SORBS2   | 0.49 | 3.12E-01 | 0.13  | 4.49E-01 | 0.48  | 3.17E-01 |
| NUDT1    | 0.49 | 3.12E-01 | -0.26 | 6.03E-01 | 1.47  | 7.10E-02 |
| PITPNM3  | 0.49 | 3.12E-01 | -0.67 | 7.47E-01 | 3.36  | 3.94E-04 |
| WNT5A    | 0.49 | 3.12E-01 | 1.88  | 3.03E-02 | -1.03 | 8.48E-01 |
| GALNT13  | 0.49 | 3.13E-01 | -0.02 | 5.07E-01 | -0.51 | 6.93E-01 |
| ARHGAP42 | 0.49 | 3.13E-01 | -0.52 | 7.00E-01 | 0.54  | 2.94E-01 |

|            |      |          |       |          |       |          |
|------------|------|----------|-------|----------|-------|----------|
| EPHB3      | 0.49 | 3.13E-01 | -1.16 | 8.77E-01 | 0.60  | 2.74E-01 |
| TCF15      | 0.49 | 3.13E-01 | 0.20  | 4.20E-01 | 0.37  | 3.58E-01 |
| CYFIP2     | 0.49 | 3.13E-01 | -0.36 | 6.40E-01 | 0.31  | 3.77E-01 |
| CGREF1     | 0.49 | 3.13E-01 | 1.65  | 4.98E-02 | 0.05  | 4.81E-01 |
| CCDC158    | 0.49 | 3.13E-01 | -0.17 | 5.67E-01 | 0.32  | 3.75E-01 |
| DEDD2      | 0.49 | 3.13E-01 | 1.55  | 6.09E-02 | -0.73 | 7.69E-01 |
| CNTLN      | 0.49 | 3.13E-01 | 0.14  | 4.44E-01 | 0.01  | 4.98E-01 |
| BPIFB4     | 0.49 | 3.13E-01 | -1.24 | 8.93E-01 | 0.66  | 2.56E-01 |
| SEC24C     | 0.49 | 3.13E-01 | 0.03  | 4.87E-01 | 0.14  | 4.45E-01 |
| ADAL       | 0.49 | 3.13E-01 | 1.02  | 1.54E-01 | 1.12  | 1.32E-01 |
| APPL2      | 0.49 | 3.13E-01 | 0.73  | 2.32E-01 | -0.65 | 7.43E-01 |
| ACBD7      | 0.49 | 3.13E-01 | -0.24 | 5.95E-01 | -0.29 | 6.14E-01 |
| WRB        | 0.49 | 3.13E-01 | 0.77  | 2.22E-01 | -0.30 | 6.18E-01 |
| TAF6       | 0.49 | 3.13E-01 | -1.11 | 8.67E-01 | 1.94  | 2.62E-02 |
| SLBP       | 0.49 | 3.13E-01 | 1.16  | 1.23E-01 | -1.82 | 9.65E-01 |
| RGCC       | 0.49 | 3.13E-01 | 2.10  | 1.80E-02 | -0.97 | 8.34E-01 |
| LSM12      | 0.49 | 3.13E-01 | 0.72  | 2.37E-01 | -1.02 | 8.45E-01 |
| ARHGDIB    | 0.49 | 3.13E-01 | -0.57 | 7.14E-01 | 0.29  | 3.86E-01 |
| EXOSC8     | 0.49 | 3.13E-01 | 0.60  | 2.76E-01 | -1.03 | 8.48E-01 |
| BACE2      | 0.49 | 3.13E-01 | 0.48  | 3.16E-01 | -0.24 | 5.93E-01 |
| CDK2       | 0.49 | 3.13E-01 | 0.84  | 2.01E-01 | 1.02  | 1.53E-01 |
| PROKR1     | 0.49 | 3.13E-01 | -0.74 | 7.71E-01 | 0.67  | 2.51E-01 |
| KCNH3      | 0.49 | 3.13E-01 | 0.28  | 3.91E-01 | 0.30  | 3.80E-01 |
| SLC16A1    | 0.49 | 3.13E-01 | 0.50  | 3.10E-01 | -0.35 | 6.36E-01 |
| LRRC19     | 0.49 | 3.13E-01 | 1.20  | 1.15E-01 | -0.25 | 5.99E-01 |
| KPNA7      | 0.49 | 3.13E-01 | 0.73  | 2.33E-01 | -0.69 | 7.54E-01 |
| PDE6G      | 0.49 | 3.14E-01 | 0.81  | 2.08E-01 | -0.78 | 7.81E-01 |
| BICD1      | 0.49 | 3.14E-01 | -0.62 | 7.31E-01 | 1.52  | 6.40E-02 |
| HRH1       | 0.49 | 3.14E-01 | -0.41 | 6.59E-01 | 0.49  | 3.12E-01 |
| SLC29A1    | 0.49 | 3.14E-01 | 0.28  | 3.91E-01 | -0.73 | 7.69E-01 |
| UBE2F-SCLY | 0.48 | 3.14E-01 | 0.16  | 4.36E-01 | -0.19 | 5.76E-01 |



|          |      |          |       |          |       |          |
|----------|------|----------|-------|----------|-------|----------|
| PTBP2    | 0.48 | 3.14E-01 | 0.36  | 3.59E-01 | 0.60  | 2.74E-01 |
| HFE2     | 0.48 | 3.14E-01 | 0.41  | 3.41E-01 | 0.04  | 4.83E-01 |
| OR4B1    | 0.48 | 3.14E-01 | 0.50  | 3.08E-01 | 0.41  | 3.42E-01 |
| KRT80    | 0.48 | 3.14E-01 | 2.11  | 1.73E-02 | 0.00  | 4.99E-01 |
| GPR146   | 0.48 | 3.14E-01 | 0.23  | 4.08E-01 | 0.92  | 1.79E-01 |
| ZNF541   | 0.48 | 3.14E-01 | 1.36  | 8.67E-02 | -1.24 | 8.92E-01 |
| C9orf43  | 0.48 | 3.14E-01 | -0.15 | 5.59E-01 | 1.32  | 9.33E-02 |
| CSNK2A2  | 0.48 | 3.14E-01 | 1.91  | 2.81E-02 | -0.30 | 6.20E-01 |
| GADL1    | 0.48 | 3.14E-01 | -0.58 | 7.21E-01 | 0.56  | 2.87E-01 |
| PRKDC    | 0.48 | 3.14E-01 | 1.60  | 5.47E-02 | 0.73  | 2.33E-01 |
| SLC9A8   | 0.48 | 3.14E-01 | 0.66  | 2.55E-01 | -1.16 | 8.76E-01 |
| TMEM158  | 0.48 | 3.15E-01 | 0.32  | 3.73E-01 | 0.57  | 2.83E-01 |
| RNPC3    | 0.48 | 3.15E-01 | 0.48  | 3.15E-01 | -0.13 | 5.54E-01 |
| FAM136A  | 0.48 | 3.15E-01 | 0.60  | 2.74E-01 | -0.29 | 6.13E-01 |
| HNRNPLL  | 0.48 | 3.15E-01 | 0.44  | 3.31E-01 | -0.12 | 5.47E-01 |
| KRTAP4-9 | 0.48 | 3.15E-01 | 1.81  | 3.52E-02 | -0.11 | 5.45E-01 |
| LMO4     | 0.48 | 3.15E-01 | 0.86  | 1.95E-01 | -0.96 | 8.33E-01 |
| HIST1H3G | 0.48 | 3.15E-01 | -0.51 | 6.93E-01 | 0.58  | 2.82E-01 |
| IKZF1    | 0.48 | 3.15E-01 | 0.73  | 2.33E-01 | -0.17 | 5.68E-01 |
| WDR91    | 0.48 | 3.15E-01 | 0.00  | 5.01E-01 | 0.47  | 3.19E-01 |
| KIAA1257 | 0.48 | 3.15E-01 | 1.33  | 9.18E-02 | -0.28 | 6.11E-01 |
| FZD1     | 0.48 | 3.15E-01 | 0.31  | 3.80E-01 | -0.45 | 6.74E-01 |
| SLC25A15 | 0.48 | 3.15E-01 | 0.44  | 3.29E-01 | -0.54 | 7.07E-01 |
| CEP85L   | 0.48 | 3.15E-01 | 0.13  | 4.48E-01 | -0.11 | 5.45E-01 |
| PRF1     | 0.48 | 3.15E-01 | 1.02  | 1.55E-01 | -0.74 | 7.71E-01 |
| RAB3IP   | 0.48 | 3.15E-01 | 0.86  | 1.96E-01 | 0.71  | 2.38E-01 |
| RAD51B   | 0.48 | 3.15E-01 | 0.68  | 2.47E-01 | -0.50 | 6.92E-01 |
| MSRB2    | 0.48 | 3.15E-01 | -0.85 | 8.03E-01 | 0.75  | 2.28E-01 |
| TNFRSF17 | 0.48 | 3.15E-01 | 0.78  | 2.18E-01 | -1.13 | 8.71E-01 |
| DUSP2    | 0.48 | 3.15E-01 | 0.88  | 1.89E-01 | -1.84 | 9.67E-01 |
| CCR10    | 0.48 | 3.15E-01 | -0.79 | 7.84E-01 | 0.53  | 2.97E-01 |

|               |      |          |       |          |       |          |
|---------------|------|----------|-------|----------|-------|----------|
| GBP1          | 0.48 | 3.15E-01 | 0.93  | 1.77E-01 | -1.67 | 9.53E-01 |
| RND1          | 0.48 | 3.15E-01 | -0.56 | 7.14E-01 | 1.56  | 5.92E-02 |
| PAF1          | 0.48 | 3.15E-01 | 0.61  | 2.71E-01 | -0.51 | 6.94E-01 |
| SLC39A8       | 0.48 | 3.15E-01 | 0.05  | 4.80E-01 | 1.02  | 1.54E-01 |
| ARHGAP31      | 0.48 | 3.15E-01 | -0.04 | 5.16E-01 | 0.50  | 3.10E-01 |
| RAB18         | 0.48 | 3.15E-01 | 0.91  | 1.82E-01 | -1.19 | 8.83E-01 |
| CLDN7         | 0.48 | 3.15E-01 | -0.08 | 5.33E-01 | -0.07 | 5.28E-01 |
| ZNF155        | 0.48 | 3.16E-01 | 0.86  | 1.95E-01 | 0.16  | 4.38E-01 |
| MKS1          | 0.48 | 3.16E-01 | 0.52  | 3.03E-01 | 0.16  | 4.38E-01 |
| OR51D1        | 0.48 | 3.16E-01 | -0.60 | 7.25E-01 | 1.22  | 1.11E-01 |
| THG1L         | 0.48 | 3.16E-01 | 0.77  | 2.20E-01 | -0.40 | 6.57E-01 |
| OSBPL9        | 0.48 | 3.16E-01 | -0.66 | 7.45E-01 | 0.14  | 4.46E-01 |
| C3orf27       | 0.48 | 3.16E-01 | 1.03  | 1.52E-01 | -0.69 | 7.54E-01 |
| CAMK4         | 0.48 | 3.16E-01 | 0.07  | 4.73E-01 | -0.65 | 7.41E-01 |
| TTC37         | 0.48 | 3.16E-01 | 0.75  | 2.27E-01 | 0.48  | 3.15E-01 |
| SUGCT         | 0.48 | 3.16E-01 | -0.30 | 6.18E-01 | -0.62 | 7.31E-01 |
| C1orf105      | 0.48 | 3.16E-01 | -0.48 | 6.83E-01 | 1.45  | 7.38E-02 |
| IFRD2         | 0.48 | 3.16E-01 | 2.44  | 7.28E-03 | -0.39 | 6.50E-01 |
| RDM1          | 0.48 | 3.16E-01 | -1.05 | 8.53E-01 | 0.80  | 2.12E-01 |
| CDH2          | 0.48 | 3.16E-01 | 0.67  | 2.52E-01 | -1.01 | 8.44E-01 |
| EVI2B         | 0.48 | 3.16E-01 | -0.26 | 6.03E-01 | 1.79  | 3.64E-02 |
| CTD-2207O23.3 | 0.48 | 3.17E-01 | -0.80 | 7.87E-01 | 0.81  | 2.09E-01 |
| TWISTNB       | 0.48 | 3.17E-01 | -0.19 | 5.76E-01 | 2.45  | 7.05E-03 |
| SPRED2        | 0.48 | 3.17E-01 | -0.57 | 7.15E-01 | -0.31 | 6.23E-01 |
| TTF2          | 0.48 | 3.17E-01 | -0.96 | 8.31E-01 | 0.66  | 2.55E-01 |
| CACNA1S       | 0.48 | 3.17E-01 | -1.04 | 8.50E-01 | 0.78  | 2.17E-01 |
| TAMM41        | 0.48 | 3.17E-01 | 0.14  | 4.44E-01 | -0.07 | 5.27E-01 |
| KPNA1         | 0.48 | 3.17E-01 | 0.66  | 2.56E-01 | -0.39 | 6.52E-01 |
| ACOX3         | 0.48 | 3.17E-01 | 0.92  | 1.80E-01 | 0.17  | 4.32E-01 |
| ZNF511        | 0.48 | 3.17E-01 | -1.70 | 9.55E-01 | 2.11  | 1.74E-02 |
| GABRR2        | 0.48 | 3.17E-01 | -1.33 | 9.09E-01 | 1.10  | 1.35E-01 |

|          |      |          |       |          |       |          |
|----------|------|----------|-------|----------|-------|----------|
| TP53     | 0.48 | 3.17E-01 | -0.44 | 6.72E-01 | 0.88  | 1.90E-01 |
| KLK13    | 0.48 | 3.17E-01 | 1.31  | 9.51E-02 | -1.19 | 8.83E-01 |
| TRIM16   | 0.48 | 3.17E-01 | 0.88  | 1.90E-01 | 2.76  | 2.90E-03 |
| NCK1     | 0.47 | 3.17E-01 | 0.87  | 1.92E-01 | -1.30 | 9.04E-01 |
| KLF7     | 0.47 | 3.17E-01 | 0.34  | 3.67E-01 | 0.55  | 2.90E-01 |
| PRKG1    | 0.47 | 3.18E-01 | 1.23  | 1.09E-01 | 2.43  | 7.49E-03 |
| RAB4A    | 0.47 | 3.18E-01 | -0.16 | 5.65E-01 | 0.47  | 3.18E-01 |
| AFF1     | 0.47 | 3.18E-01 | 0.61  | 2.69E-01 | -0.41 | 6.58E-01 |
| CASD1    | 0.47 | 3.18E-01 | 0.63  | 2.64E-01 | -0.95 | 8.30E-01 |
| CNTFR    | 0.47 | 3.18E-01 | 1.47  | 7.07E-02 | -0.31 | 6.23E-01 |
| ZNF264   | 0.47 | 3.18E-01 | 1.35  | 8.85E-02 | -0.45 | 6.72E-01 |
| SIPA1L1  | 0.47 | 3.18E-01 | -0.22 | 5.88E-01 | 1.22  | 1.11E-01 |
| C16orf86 | 0.47 | 3.18E-01 | 0.21  | 4.16E-01 | 2.12  | 1.71E-02 |
| TNFAIP3  | 0.47 | 3.18E-01 | -0.33 | 6.31E-01 | -0.11 | 5.43E-01 |
| COPS2    | 0.47 | 3.18E-01 | -0.83 | 7.98E-01 | 0.50  | 3.09E-01 |
| MYBPC2   | 0.47 | 3.18E-01 | -0.43 | 6.65E-01 | 0.36  | 3.61E-01 |
| ATP10D   | 0.47 | 3.18E-01 | 0.46  | 3.22E-01 | 1.30  | 9.70E-02 |
| IGFL3    | 0.47 | 3.19E-01 | 0.28  | 3.90E-01 | -0.66 | 7.46E-01 |
| GEMIN7   | 0.47 | 3.19E-01 | -0.85 | 8.01E-01 | 0.85  | 1.99E-01 |
| GNB2     | 0.47 | 3.19E-01 | 0.55  | 2.90E-01 | 0.21  | 4.16E-01 |
| UBE2D4   | 0.47 | 3.19E-01 | 0.32  | 3.76E-01 | -0.13 | 5.51E-01 |
| NLRC4    | 0.47 | 3.19E-01 | -0.78 | 7.81E-01 | 0.92  | 1.79E-01 |
| ZFP41    | 0.47 | 3.19E-01 | 0.10  | 4.61E-01 | 1.99  | 2.31E-02 |
| GAS2L3   | 0.47 | 3.19E-01 | 1.20  | 1.15E-01 | -0.35 | 6.38E-01 |
| BAHD1    | 0.47 | 3.19E-01 | 1.47  | 7.02E-02 | -1.61 | 9.47E-01 |
| POLR2D   | 0.47 | 3.19E-01 | 0.76  | 2.23E-01 | -0.69 | 7.56E-01 |
| CTNS     | 0.47 | 3.19E-01 | 0.69  | 2.44E-01 | 0.00  | 5.00E-01 |
| MCUR1    | 0.47 | 3.19E-01 | -0.99 | 8.40E-01 | 1.38  | 8.32E-02 |
| LYN      | 0.47 | 3.19E-01 | -0.03 | 5.11E-01 | -0.04 | 5.17E-01 |
| MYO6     | 0.47 | 3.19E-01 | 0.53  | 2.97E-01 | -0.72 | 7.63E-01 |
| ZSWIM4   | 0.47 | 3.20E-01 | 1.62  | 5.26E-02 | -1.03 | 8.49E-01 |

|           |      |          |       |          |       |          |
|-----------|------|----------|-------|----------|-------|----------|
| KCNMB2    | 0.47 | 3.20E-01 | 0.02  | 4.92E-01 | 1.65  | 4.99E-02 |
| POLR3B    | 0.47 | 3.20E-01 | 0.69  | 2.47E-01 | -1.05 | 8.53E-01 |
| DPY19L2   | 0.47 | 3.20E-01 | 0.90  | 1.85E-01 | 1.94  | 2.65E-02 |
| USP36     | 0.47 | 3.20E-01 | 0.72  | 2.36E-01 | -0.04 | 5.16E-01 |
| OR13C3    | 0.47 | 3.20E-01 | -0.67 | 7.50E-01 | 0.71  | 2.38E-01 |
| PYGO1     | 0.47 | 3.20E-01 | 1.09  | 1.37E-01 | 0.29  | 3.86E-01 |
| ITSN2     | 0.47 | 3.20E-01 | -0.09 | 5.36E-01 | 0.26  | 3.99E-01 |
| APLP1     | 0.47 | 3.20E-01 | -0.23 | 5.92E-01 | 0.41  | 3.40E-01 |
| GPC2      | 0.47 | 3.20E-01 | 0.27  | 3.94E-01 | 0.49  | 3.12E-01 |
| KLF4      | 0.47 | 3.21E-01 | 0.04  | 4.83E-01 | -0.12 | 5.48E-01 |
| NSUN3     | 0.47 | 3.21E-01 | -0.27 | 6.05E-01 | 0.47  | 3.20E-01 |
| EPCAM     | 0.47 | 3.21E-01 | 0.41  | 3.40E-01 | 0.20  | 4.21E-01 |
| DVL1      | 0.47 | 3.21E-01 | 0.41  | 3.41E-01 | -0.36 | 6.39E-01 |
| C20orf195 | 0.47 | 3.21E-01 | 0.94  | 1.74E-01 | -0.46 | 6.76E-01 |
| ESM1      | 0.46 | 3.21E-01 | 1.81  | 3.54E-02 | -0.56 | 7.11E-01 |
| TMEM170A  | 0.46 | 3.21E-01 | 0.78  | 2.18E-01 | 0.11  | 4.55E-01 |
| RGPD4     | 0.46 | 3.21E-01 | 1.43  | 7.63E-02 | -1.49 | 9.32E-01 |
| SCARB1    | 0.46 | 3.21E-01 | -0.34 | 6.35E-01 | -0.48 | 6.84E-01 |
| PDZK1IP1  | 0.46 | 3.21E-01 | 1.55  | 6.04E-02 | 0.22  | 4.13E-01 |
| CCDC27    | 0.46 | 3.21E-01 | 0.31  | 3.80E-01 | 0.66  | 2.56E-01 |
| THOC1     | 0.46 | 3.21E-01 | 0.70  | 2.41E-01 | 0.62  | 2.67E-01 |
| SCN2B     | 0.46 | 3.21E-01 | 1.81  | 3.50E-02 | 0.58  | 2.82E-01 |
| UNC50     | 0.46 | 3.22E-01 | -1.09 | 8.63E-01 | 0.77  | 2.19E-01 |
| FPR3      | 0.46 | 3.22E-01 | 0.60  | 2.75E-01 | 0.11  | 4.55E-01 |
| HSP90AB1  | 0.46 | 3.22E-01 | 0.70  | 2.43E-01 | -0.75 | 7.72E-01 |
| NAT9      | 0.46 | 3.22E-01 | 0.39  | 3.49E-01 | 0.08  | 4.68E-01 |
| BASP1     | 0.46 | 3.22E-01 | -0.78 | 7.82E-01 | 0.54  | 2.95E-01 |
| ANKMY2    | 0.46 | 3.22E-01 | -0.52 | 7.00E-01 | 0.88  | 1.91E-01 |
| ULK2      | 0.46 | 3.22E-01 | -0.49 | 6.86E-01 | 0.62  | 2.69E-01 |
| RXFP3     | 0.46 | 3.22E-01 | -0.62 | 7.32E-01 | 0.79  | 2.14E-01 |
| AMY2B     | 0.46 | 3.22E-01 | 0.93  | 1.77E-01 | -0.39 | 6.53E-01 |

|           |      |          |       |          |       |          |
|-----------|------|----------|-------|----------|-------|----------|
| GAP43     | 0.46 | 3.22E-01 | 0.45  | 3.26E-01 | -0.22 | 5.88E-01 |
| DCUN1D1   | 0.46 | 3.22E-01 | 1.46  | 7.15E-02 | 0.72  | 2.35E-01 |
| CCDC102B  | 0.46 | 3.22E-01 | -0.86 | 8.06E-01 | 0.95  | 1.70E-01 |
| VIPAS39   | 0.46 | 3.22E-01 | -0.96 | 8.33E-01 | 0.48  | 3.14E-01 |
| IL1RL2    | 0.46 | 3.22E-01 | 0.38  | 3.53E-01 | -0.47 | 6.80E-01 |
| TUBGCP6   | 0.46 | 3.23E-01 | 1.64  | 5.09E-02 | -0.61 | 7.31E-01 |
| SMIM23    | 0.46 | 3.23E-01 | 0.66  | 2.56E-01 | -0.75 | 7.75E-01 |
| SLFN12    | 0.46 | 3.23E-01 | 0.23  | 4.10E-01 | -0.77 | 7.79E-01 |
| TBCC      | 0.46 | 3.23E-01 | -2.01 | 9.78E-01 | 1.30  | 9.64E-02 |
| SIGLEC11  | 0.46 | 3.23E-01 | -0.86 | 8.06E-01 | 1.98  | 2.38E-02 |
| EIF3B     | 0.46 | 3.23E-01 | 0.51  | 3.07E-01 | 0.51  | 3.06E-01 |
| KRTAP20-1 | 0.46 | 3.23E-01 | -0.35 | 6.36E-01 | 0.27  | 3.92E-01 |
| OR5B2     | 0.46 | 3.23E-01 | 0.08  | 4.70E-01 | 1.74  | 4.08E-02 |
| MROH8     | 0.46 | 3.23E-01 | 1.74  | 4.09E-02 | -1.46 | 9.28E-01 |
| SLC23A2   | 0.46 | 3.23E-01 | 0.44  | 3.29E-01 | 0.28  | 3.90E-01 |
| RTDR1     | 0.46 | 3.23E-01 | 0.21  | 4.16E-01 | 0.63  | 2.66E-01 |
| NANS      | 0.46 | 3.23E-01 | 0.25  | 4.02E-01 | -0.08 | 5.31E-01 |
| OR13F1    | 0.46 | 3.23E-01 | 0.88  | 1.89E-01 | 0.10  | 4.58E-01 |
| TEP1      | 0.46 | 3.23E-01 | -0.94 | 8.27E-01 | 0.06  | 4.75E-01 |
| CST11     | 0.46 | 3.24E-01 | 0.11  | 4.57E-01 | -0.33 | 6.28E-01 |
| MIPEP     | 0.46 | 3.24E-01 | 0.86  | 1.95E-01 | 0.34  | 3.67E-01 |
| CDK8      | 0.46 | 3.24E-01 | 0.24  | 4.04E-01 | -0.75 | 7.73E-01 |
| SMIM17    | 0.46 | 3.24E-01 | -0.71 | 7.60E-01 | 0.17  | 4.34E-01 |
| ATP1B2    | 0.46 | 3.24E-01 | -0.31 | 6.23E-01 | 0.03  | 4.89E-01 |
| PIWIL4    | 0.46 | 3.24E-01 | 0.61  | 2.72E-01 | -0.37 | 6.45E-01 |
| EXO1      | 0.46 | 3.24E-01 | 1.24  | 1.08E-01 | 0.84  | 2.00E-01 |
| STRN      | 0.46 | 3.24E-01 | 2.41  | 8.07E-03 | -0.15 | 5.61E-01 |
| IMPDH2    | 0.46 | 3.24E-01 | 0.37  | 3.57E-01 | 1.64  | 5.07E-02 |
| GLI4      | 0.46 | 3.24E-01 | 0.04  | 4.84E-01 | 1.59  | 5.60E-02 |
| C11orf70  | 0.46 | 3.24E-01 | 0.93  | 1.75E-01 | -1.48 | 9.31E-01 |
| SYT7      | 0.46 | 3.24E-01 | -1.03 | 8.47E-01 | 1.46  | 7.19E-02 |

|         |      |          |       |          |       |          |
|---------|------|----------|-------|----------|-------|----------|
| DLGAP5  | 0.46 | 3.24E-01 | 0.44  | 3.28E-01 | 0.60  | 2.75E-01 |
| RRAS    | 0.46 | 3.24E-01 | 0.06  | 4.77E-01 | 0.12  | 4.54E-01 |
| WTIP    | 0.46 | 3.24E-01 | 0.45  | 3.25E-01 | -0.47 | 6.81E-01 |
| GUF1    | 0.46 | 3.24E-01 | 0.48  | 3.15E-01 | -0.43 | 6.68E-01 |
| MRPL13  | 0.46 | 3.24E-01 | -0.65 | 7.43E-01 | 1.00  | 1.58E-01 |
| PSME2   | 0.46 | 3.25E-01 | -0.57 | 7.15E-01 | 0.52  | 3.02E-01 |
| ALG10   | 0.45 | 3.25E-01 | 0.10  | 4.60E-01 | 0.59  | 2.76E-01 |
| GSTA2   | 0.45 | 3.25E-01 | -0.32 | 6.26E-01 | 0.36  | 3.59E-01 |
| HMBS    | 0.45 | 3.25E-01 | 0.48  | 3.15E-01 | 0.53  | 2.98E-01 |
| OR6A2   | 0.45 | 3.25E-01 | 1.24  | 1.07E-01 | -2.44 | 9.93E-01 |
| TAF5L   | 0.45 | 3.25E-01 | 0.37  | 3.57E-01 | -1.01 | 8.44E-01 |
| WDHD1   | 0.45 | 3.25E-01 | -0.91 | 8.17E-01 | 1.45  | 7.41E-02 |
| DDX56   | 0.45 | 3.25E-01 | 0.53  | 2.98E-01 | 0.94  | 1.72E-01 |
| COL22A1 | 0.45 | 3.25E-01 | -0.08 | 5.34E-01 | 0.73  | 2.31E-01 |
| STXBP3  | 0.45 | 3.25E-01 | 0.17  | 4.33E-01 | 0.05  | 4.79E-01 |
| SEC23B  | 0.45 | 3.25E-01 | -0.69 | 7.54E-01 | 1.49  | 6.81E-02 |
| PCK1    | 0.45 | 3.25E-01 | 1.02  | 1.53E-01 | -2.10 | 9.82E-01 |
| NDUFA2  | 0.45 | 3.25E-01 | -0.35 | 6.38E-01 | -0.02 | 5.07E-01 |
| OR5AP2  | 0.45 | 3.25E-01 | 1.10  | 1.36E-01 | -1.79 | 9.63E-01 |
| NUP155  | 0.45 | 3.25E-01 | -0.10 | 5.42E-01 | 0.21  | 4.16E-01 |
| ZNF764  | 0.45 | 3.26E-01 | 0.72  | 2.36E-01 | 0.68  | 2.50E-01 |
| SRPRB   | 0.45 | 3.26E-01 | 1.07  | 1.43E-01 | -0.73 | 7.67E-01 |
| FAM26F  | 0.45 | 3.26E-01 | 1.49  | 6.78E-02 | -1.33 | 9.08E-01 |
| BTBD7   | 0.45 | 3.26E-01 | -0.13 | 5.51E-01 | 0.17  | 4.34E-01 |
| CNNM3   | 0.45 | 3.26E-01 | 2.13  | 1.67E-02 | 0.66  | 2.55E-01 |
| ZNF628  | 0.45 | 3.26E-01 | 0.59  | 2.78E-01 | -1.02 | 8.45E-01 |
| HMGCL   | 0.45 | 3.26E-01 | -0.51 | 6.93E-01 | 0.68  | 2.48E-01 |
| MYL10   | 0.45 | 3.26E-01 | -0.80 | 7.87E-01 | 0.37  | 3.56E-01 |
| SPAG16  | 0.45 | 3.26E-01 | 0.97  | 1.66E-01 | -0.40 | 6.56E-01 |
| SPTAN1  | 0.45 | 3.26E-01 | 0.59  | 2.78E-01 | -0.79 | 7.86E-01 |
| APBB1IP | 0.45 | 3.26E-01 | 1.44  | 7.54E-02 | 1.64  | 5.05E-02 |

|            |      |          |       |          |       |          |
|------------|------|----------|-------|----------|-------|----------|
| ATAD3A     | 0.45 | 3.26E-01 | 1.37  | 8.48E-02 | -0.72 | 7.65E-01 |
| MVB12B     | 0.45 | 3.26E-01 | 0.91  | 1.81E-01 | -0.62 | 7.33E-01 |
| TNKS2      | 0.45 | 3.26E-01 | -0.11 | 5.46E-01 | 0.51  | 3.06E-01 |
| PRSS16     | 0.45 | 3.26E-01 | 0.93  | 1.77E-01 | -1.03 | 8.48E-01 |
| SNX16      | 0.45 | 3.26E-01 | 0.84  | 2.01E-01 | -1.06 | 8.56E-01 |
| NT5C2      | 0.45 | 3.27E-01 | -0.30 | 6.18E-01 | -0.50 | 6.90E-01 |
| LY86       | 0.45 | 3.27E-01 | 1.25  | 1.05E-01 | -0.59 | 7.23E-01 |
| AC110619.2 | 0.45 | 3.27E-01 | 0.50  | 3.09E-01 | -0.11 | 5.45E-01 |
| OR10G2     | 0.45 | 3.27E-01 | 0.52  | 3.00E-01 | -1.23 | 8.90E-01 |
| PPFIA4     | 0.45 | 3.27E-01 | 0.47  | 3.18E-01 | -0.93 | 8.24E-01 |
| VPS18      | 0.45 | 3.27E-01 | 0.12  | 4.52E-01 | -0.24 | 5.95E-01 |
| PRDM13     | 0.45 | 3.27E-01 | -0.43 | 6.65E-01 | 1.45  | 7.40E-02 |
| CBL        | 0.45 | 3.27E-01 | 0.39  | 3.49E-01 | -0.84 | 8.00E-01 |
| ADAMTS19   | 0.45 | 3.27E-01 | -0.80 | 7.89E-01 | 0.28  | 3.89E-01 |
| MCAM       | 0.45 | 3.27E-01 | 1.12  | 1.31E-01 | -0.59 | 7.24E-01 |
| OR14J1     | 0.45 | 3.27E-01 | -0.31 | 6.20E-01 | 0.23  | 4.09E-01 |
| KRTAP4-11  | 0.45 | 3.27E-01 | 1.86  | 3.14E-02 | -0.35 | 6.38E-01 |
| KCNG1      | 0.45 | 3.27E-01 | 0.47  | 3.18E-01 | 2.23  | 1.28E-02 |
| C2ORF15    | 0.45 | 3.27E-01 | 0.21  | 4.17E-01 | 0.42  | 3.36E-01 |
| CCDC38     | 0.45 | 3.27E-01 | 0.35  | 3.62E-01 | 0.49  | 3.12E-01 |
| SPDYE4     | 0.45 | 3.27E-01 | -0.45 | 6.73E-01 | 0.30  | 3.80E-01 |
| SLC25A24   | 0.45 | 3.27E-01 | 1.66  | 4.82E-02 | -1.10 | 8.64E-01 |
| FAM65B     | 0.45 | 3.27E-01 | 1.02  | 1.54E-01 | 0.95  | 1.70E-01 |
| RELN       | 0.45 | 3.27E-01 | 0.56  | 2.86E-01 | -1.98 | 9.76E-01 |
| TMEM64     | 0.45 | 3.27E-01 | -0.07 | 5.28E-01 | 0.21  | 4.18E-01 |
| ENY2       | 0.45 | 3.27E-01 | -0.84 | 7.99E-01 | 0.30  | 3.81E-01 |
| RNF212     | 0.45 | 3.27E-01 | 1.00  | 1.58E-01 | -1.42 | 9.22E-01 |
| FAM161B    | 0.45 | 3.27E-01 | -0.61 | 7.30E-01 | 0.15  | 4.41E-01 |
| ATO8       | 0.45 | 3.28E-01 | -0.46 | 6.77E-01 | 0.65  | 2.59E-01 |
| ZNF613     | 0.45 | 3.28E-01 | 2.28  | 1.14E-02 | 0.98  | 1.64E-01 |
| AASS       | 0.45 | 3.28E-01 | -0.68 | 7.52E-01 | 0.48  | 3.17E-01 |

|           |      |          |       |          |       |          |
|-----------|------|----------|-------|----------|-------|----------|
| INS       | 0.45 | 3.28E-01 | 0.40  | 3.44E-01 | -0.16 | 5.65E-01 |
| CDKN3     | 0.45 | 3.28E-01 | -1.56 | 9.40E-01 | 0.86  | 1.94E-01 |
| C8orf48   | 0.45 | 3.28E-01 | 0.95  | 1.71E-01 | 0.30  | 3.81E-01 |
| CASS4     | 0.45 | 3.28E-01 | -0.88 | 8.10E-01 | 0.75  | 2.27E-01 |
| SCNN1A    | 0.45 | 3.28E-01 | 0.09  | 4.66E-01 | -0.70 | 7.58E-01 |
| ZBTB39    | 0.45 | 3.28E-01 | -0.68 | 7.51E-01 | 0.91  | 1.81E-01 |
| WDR76     | 0.45 | 3.28E-01 | 1.28  | 1.00E-01 | -0.43 | 6.68E-01 |
| SERPINB13 | 0.44 | 3.28E-01 | -2.05 | 9.80E-01 | 1.33  | 9.10E-02 |
| MPHOSPH8  | 0.44 | 3.28E-01 | 0.94  | 1.73E-01 | -1.13 | 8.70E-01 |
| GSS       | 0.44 | 3.28E-01 | 1.19  | 1.18E-01 | -1.16 | 8.77E-01 |
| CLCNKA    | 0.44 | 3.28E-01 | 0.04  | 4.84E-01 | -0.91 | 8.19E-01 |
| DNAJC27   | 0.44 | 3.28E-01 | 0.22  | 4.12E-01 | 0.30  | 3.81E-01 |
| C17orf66  | 0.44 | 3.28E-01 | -0.83 | 7.97E-01 | 0.64  | 2.60E-01 |
| ITK       | 0.44 | 3.29E-01 | 0.49  | 3.13E-01 | -0.71 | 7.61E-01 |
| GLRX3     | 0.44 | 3.29E-01 | -0.33 | 6.29E-01 | 0.91  | 1.81E-01 |
| POLE3     | 0.44 | 3.29E-01 | -0.28 | 6.09E-01 | 1.15  | 1.26E-01 |
| PAEP      | 0.44 | 3.29E-01 | 0.73  | 2.32E-01 | -0.27 | 6.06E-01 |
| CASP12    | 0.44 | 3.29E-01 | -0.31 | 6.23E-01 | -0.17 | 5.68E-01 |
| GGCX      | 0.44 | 3.29E-01 | 0.49  | 3.11E-01 | 0.94  | 1.73E-01 |
| TLR5      | 0.44 | 3.29E-01 | -0.06 | 5.24E-01 | 1.52  | 6.37E-02 |
| ARL2      | 0.44 | 3.29E-01 | -0.63 | 7.35E-01 | 0.86  | 1.94E-01 |
| PLCL2     | 0.44 | 3.29E-01 | 1.44  | 7.51E-02 | 1.41  | 7.88E-02 |
| EXOC7     | 0.44 | 3.29E-01 | 0.81  | 2.10E-01 | -0.95 | 8.28E-01 |
| BTN2A2    | 0.44 | 3.29E-01 | 1.00  | 1.60E-01 | 1.11  | 1.34E-01 |
| TMPRSS6   | 0.44 | 3.29E-01 | -0.09 | 5.37E-01 | -0.43 | 6.66E-01 |
| KIRREL2   | 0.44 | 3.29E-01 | 0.01  | 4.95E-01 | 0.15  | 4.42E-01 |
| ZNF391    | 0.44 | 3.29E-01 | 0.18  | 4.28E-01 | 0.50  | 3.09E-01 |
| CASP1     | 0.44 | 3.29E-01 | -1.37 | 9.14E-01 | 1.16  | 1.24E-01 |
| TRAM2     | 0.44 | 3.29E-01 | 0.34  | 3.69E-01 | -0.95 | 8.29E-01 |
| ACAP3     | 0.44 | 3.29E-01 | 0.06  | 4.75E-01 | -0.47 | 6.79E-01 |
| IMP4      | 0.44 | 3.29E-01 | -0.55 | 7.08E-01 | 1.08  | 1.40E-01 |



|               |      |          |       |          |       |          |
|---------------|------|----------|-------|----------|-------|----------|
| ATP13A4       | 0.44 | 3.30E-01 | -0.69 | 7.54E-01 | 0.72  | 2.36E-01 |
| PAQR3         | 0.44 | 3.30E-01 | 1.47  | 7.07E-02 | -0.62 | 7.31E-01 |
| MTFMT         | 0.44 | 3.30E-01 | 0.64  | 2.62E-01 | 0.34  | 3.69E-01 |
| ZNF420        | 0.44 | 3.30E-01 | 0.03  | 4.90E-01 | 1.04  | 1.50E-01 |
| UPP2          | 0.44 | 3.30E-01 | 0.51  | 3.06E-01 | -0.07 | 5.27E-01 |
| RBM47         | 0.44 | 3.30E-01 | 0.61  | 2.72E-01 | 0.26  | 3.97E-01 |
| CLDN19        | 0.44 | 3.30E-01 | 0.58  | 2.82E-01 | -1.92 | 9.73E-01 |
| HNRNPAO       | 0.44 | 3.30E-01 | -1.09 | 8.63E-01 | 0.52  | 3.02E-01 |
| SLC44A1       | 0.44 | 3.30E-01 | 0.39  | 3.49E-01 | -0.02 | 5.07E-01 |
| MRPL27        | 0.44 | 3.30E-01 | 0.27  | 3.95E-01 | -0.54 | 7.07E-01 |
| SERPINA11     | 0.44 | 3.30E-01 | 0.94  | 1.72E-01 | -0.77 | 7.78E-01 |
| EEF1A1        | 0.44 | 3.30E-01 | 0.86  | 1.96E-01 | -0.27 | 6.06E-01 |
| OR9G4         | 0.44 | 3.30E-01 | -0.86 | 8.06E-01 | 0.86  | 1.95E-01 |
| RP11-1084J3.4 | 0.44 | 3.30E-01 | 1.96  | 2.52E-02 | -0.61 | 7.30E-01 |
| TMEM253       | 0.44 | 3.30E-01 | 1.96  | 2.47E-02 | -0.28 | 6.11E-01 |
| NRL           | 0.44 | 3.30E-01 | -0.39 | 6.51E-01 | -0.38 | 6.48E-01 |
| RP11-529K1.3  | 0.44 | 3.30E-01 | 1.36  | 8.73E-02 | 0.79  | 2.15E-01 |
| C1orf68       | 0.44 | 3.30E-01 | -0.31 | 6.20E-01 | 0.26  | 3.99E-01 |
| CORO7-PAM16   | 0.44 | 3.30E-01 | 0.31  | 3.78E-01 | 0.63  | 2.64E-01 |
| BAG3          | 0.44 | 3.30E-01 | 1.11  | 1.33E-01 | 1.26  | 1.03E-01 |
| PLA2G5        | 0.44 | 3.30E-01 | -0.67 | 7.48E-01 | 0.16  | 4.36E-01 |
| LPL           | 0.44 | 3.30E-01 | 0.19  | 4.25E-01 | -0.75 | 7.74E-01 |
| DACT3         | 0.44 | 3.31E-01 | -1.00 | 8.41E-01 | 1.19  | 1.17E-01 |
| G6PC3         | 0.44 | 3.31E-01 | 0.69  | 2.47E-01 | -1.36 | 9.14E-01 |
| SOX10         | 0.44 | 3.31E-01 | -1.21 | 8.87E-01 | 0.55  | 2.92E-01 |
| ATG5          | 0.44 | 3.31E-01 | 0.46  | 3.22E-01 | 1.86  | 3.15E-02 |
| ZNF14         | 0.44 | 3.31E-01 | 0.44  | 3.29E-01 | -1.24 | 8.92E-01 |
| CTU2          | 0.44 | 3.31E-01 | -0.91 | 8.20E-01 | 1.15  | 1.25E-01 |
| RP11-169F17.1 | 0.44 | 3.31E-01 | 1.62  | 5.23E-02 | -1.05 | 8.54E-01 |
| KRTAP10-3     | 0.44 | 3.31E-01 | -0.66 | 7.46E-01 | 0.59  | 2.76E-01 |
| C12orf43      | 0.44 | 3.31E-01 | 0.10  | 4.59E-01 | 0.85  | 1.98E-01 |

|          |      |          |       |          |       |          |
|----------|------|----------|-------|----------|-------|----------|
| ZNF804B  | 0.44 | 3.31E-01 | 1.80  | 3.62E-02 | -0.60 | 7.24E-01 |
| CCDC157  | 0.44 | 3.31E-01 | 1.19  | 1.18E-01 | -1.85 | 9.68E-01 |
| ZNF107   | 0.44 | 3.31E-01 | 0.99  | 1.61E-01 | -0.85 | 8.02E-01 |
| RPLP2    | 0.44 | 3.32E-01 | 0.98  | 1.63E-01 | 0.32  | 3.76E-01 |
| LGMN     | 0.44 | 3.32E-01 | 0.86  | 1.94E-01 | 0.22  | 4.14E-01 |
| GSX1     | 0.44 | 3.32E-01 | 0.88  | 1.89E-01 | -1.15 | 8.75E-01 |
| CLSTN3   | 0.44 | 3.32E-01 | -0.80 | 7.87E-01 | 0.56  | 2.88E-01 |
| IFNGR1   | 0.43 | 3.32E-01 | -0.64 | 7.40E-01 | 1.02  | 1.53E-01 |
| NOXRED1  | 0.43 | 3.32E-01 | -0.83 | 7.97E-01 | 0.33  | 3.70E-01 |
| C21orf59 | 0.43 | 3.32E-01 | 0.05  | 4.80E-01 | 0.17  | 4.34E-01 |
| CEP97    | 0.43 | 3.32E-01 | 0.41  | 3.40E-01 | 0.79  | 2.14E-01 |
| TSPAN14  | 0.43 | 3.32E-01 | -0.13 | 5.50E-01 | -0.25 | 5.97E-01 |
| PLEKHG6  | 0.43 | 3.32E-01 | -0.26 | 6.02E-01 | 0.19  | 4.25E-01 |
| M6PR     | 0.43 | 3.32E-01 | -0.99 | 8.40E-01 | 0.47  | 3.18E-01 |
| DDX25    | 0.43 | 3.32E-01 | -1.14 | 8.73E-01 | 0.17  | 4.31E-01 |
| SLC10A2  | 0.43 | 3.32E-01 | 0.36  | 3.59E-01 | 1.09  | 1.39E-01 |
| HPCAL1   | 0.43 | 3.32E-01 | -0.40 | 6.54E-01 | 1.54  | 6.18E-02 |
| MLX      | 0.43 | 3.32E-01 | -0.50 | 6.90E-01 | 0.15  | 4.40E-01 |
| NDRG3    | 0.43 | 3.32E-01 | 0.35  | 3.62E-01 | 0.41  | 3.42E-01 |
| SLC30A9  | 0.43 | 3.32E-01 | -1.64 | 9.49E-01 | 1.67  | 4.75E-02 |
| COA5     | 0.43 | 3.33E-01 | -0.99 | 8.38E-01 | 0.79  | 2.14E-01 |
| TSEN34   | 0.43 | 3.33E-01 | 0.43  | 3.34E-01 | -0.74 | 7.69E-01 |
| FXYD5    | 0.43 | 3.33E-01 | 1.32  | 9.26E-02 | 0.63  | 2.65E-01 |
| TPD52L1  | 0.43 | 3.33E-01 | -0.74 | 7.70E-01 | 1.60  | 5.53E-02 |
| UTS2     | 0.43 | 3.33E-01 | 0.98  | 1.64E-01 | -0.74 | 7.70E-01 |
| GOLGA2   | 0.43 | 3.33E-01 | 0.52  | 3.02E-01 | -0.78 | 7.83E-01 |
| IGSF8    | 0.43 | 3.33E-01 | -1.46 | 9.28E-01 | 1.38  | 8.40E-02 |
| ARHGEF16 | 0.43 | 3.33E-01 | 0.56  | 2.88E-01 | -0.81 | 7.90E-01 |
| BOK      | 0.43 | 3.33E-01 | 0.88  | 1.90E-01 | 0.11  | 4.55E-01 |
| PARP8    | 0.43 | 3.33E-01 | -0.49 | 6.87E-01 | 1.24  | 1.08E-01 |
| MRP63    | 0.43 | 3.33E-01 | 0.87  | 1.91E-01 | 0.28  | 3.90E-01 |

|              |      |          |       |          |       |          |
|--------------|------|----------|-------|----------|-------|----------|
| URGCP-MRPS24 | 0.43 | 3.33E-01 | 0.24  | 4.06E-01 | -0.20 | 5.80E-01 |
| SMAD4        | 0.43 | 3.34E-01 | -1.86 | 9.68E-01 | 1.41  | 7.91E-02 |
| MAN2B1       | 0.43 | 3.34E-01 | 0.18  | 4.28E-01 | -0.42 | 6.63E-01 |
| PKD1L1       | 0.43 | 3.34E-01 | -0.39 | 6.51E-01 | 0.93  | 1.75E-01 |
| C9orf41      | 0.43 | 3.34E-01 | -0.32 | 6.25E-01 | 0.64  | 2.60E-01 |
| TM4SF20      | 0.43 | 3.34E-01 | 0.78  | 2.18E-01 | 1.15  | 1.25E-01 |
| ZNF146       | 0.43 | 3.34E-01 | 1.53  | 6.33E-02 | 0.66  | 2.56E-01 |
| VAX2         | 0.43 | 3.34E-01 | 1.05  | 1.47E-01 | -2.21 | 9.86E-01 |
| MAST2        | 0.43 | 3.34E-01 | 1.67  | 4.78E-02 | -1.05 | 8.52E-01 |
| TVP23C       | 0.43 | 3.34E-01 | -0.19 | 5.76E-01 | -0.26 | 6.04E-01 |
| COL13A1      | 0.43 | 3.34E-01 | 0.98  | 1.65E-01 | -0.06 | 5.22E-01 |
| VHL          | 0.43 | 3.34E-01 | 0.49  | 3.11E-01 | -0.59 | 7.23E-01 |
| ST6GAL2      | 0.43 | 3.34E-01 | 1.11  | 1.33E-01 | 0.18  | 4.29E-01 |
| PRRG4        | 0.43 | 3.34E-01 | 1.05  | 1.48E-01 | 1.34  | 9.04E-02 |
| PPP1R42      | 0.43 | 3.34E-01 | 0.09  | 4.66E-01 | -0.30 | 6.18E-01 |
| FAM19A3      | 0.43 | 3.34E-01 | 1.28  | 1.00E-01 | 1.84  | 3.30E-02 |
| PDCD1LG2     | 0.43 | 3.34E-01 | -0.49 | 6.88E-01 | 1.41  | 7.86E-02 |
| EQTN         | 0.43 | 3.34E-01 | -1.24 | 8.92E-01 | 1.40  | 8.05E-02 |
| LYPLA1       | 0.43 | 3.34E-01 | -0.31 | 6.24E-01 | 0.08  | 4.70E-01 |
| KIF1A        | 0.43 | 3.35E-01 | 0.06  | 4.78E-01 | 2.49  | 6.37E-03 |
| METT13       | 0.43 | 3.35E-01 | -0.29 | 6.12E-01 | -0.15 | 5.58E-01 |
| PEX11G       | 0.43 | 3.35E-01 | -1.00 | 8.41E-01 | 0.31  | 3.80E-01 |
| OVOL2        | 0.43 | 3.35E-01 | 0.21  | 4.17E-01 | -0.12 | 5.47E-01 |
| UBR5         | 0.43 | 3.35E-01 | -0.18 | 5.73E-01 | -0.21 | 5.83E-01 |
| CPSF4        | 0.43 | 3.35E-01 | -0.20 | 5.78E-01 | -0.21 | 5.81E-01 |
| ARHGEF26     | 0.43 | 3.35E-01 | 0.64  | 2.61E-01 | -0.36 | 6.39E-01 |
| DDX59        | 0.43 | 3.35E-01 | 0.21  | 4.15E-01 | -1.40 | 9.19E-01 |
| USH1C        | 0.43 | 3.35E-01 | 0.16  | 4.38E-01 | 0.53  | 2.97E-01 |
| CAV2         | 0.43 | 3.35E-01 | 0.27  | 3.94E-01 | -1.79 | 9.64E-01 |
| ZNF555       | 0.43 | 3.35E-01 | 0.94  | 1.73E-01 | -1.30 | 9.03E-01 |
| TPRG1        | 0.43 | 3.35E-01 | -0.14 | 5.57E-01 | 0.70  | 2.42E-01 |

|          |      |          |       |          |       |          |
|----------|------|----------|-------|----------|-------|----------|
| PUS1     | 0.43 | 3.35E-01 | -0.71 | 7.60E-01 | 0.81  | 2.10E-01 |
| FBXL19   | 0.43 | 3.35E-01 | 1.26  | 1.04E-01 | -0.05 | 5.19E-01 |
| TCAIM    | 0.43 | 3.35E-01 | -0.20 | 5.78E-01 | 0.60  | 2.74E-01 |
| TRAK2    | 0.43 | 3.35E-01 | 1.22  | 1.12E-01 | 0.44  | 3.31E-01 |
| ARID5B   | 0.42 | 3.35E-01 | 0.71  | 2.40E-01 | -0.64 | 7.39E-01 |
| METTL22  | 0.42 | 3.36E-01 | -0.62 | 7.34E-01 | 1.54  | 6.18E-02 |
| CERKL    | 0.42 | 3.36E-01 | 0.37  | 3.56E-01 | -0.83 | 7.97E-01 |
| MTSS1    | 0.42 | 3.36E-01 | -0.19 | 5.75E-01 | 1.83  | 3.33E-02 |
| IQCF1    | 0.42 | 3.36E-01 | 1.76  | 3.94E-02 | -0.39 | 6.50E-01 |
| RFTN1    | 0.42 | 3.36E-01 | 1.34  | 9.05E-02 | 0.21  | 4.17E-01 |
| C1orf195 | 0.42 | 3.36E-01 | -1.08 | 8.59E-01 | 1.89  | 2.92E-02 |
| CNEP1R1  | 0.42 | 3.36E-01 | 0.79  | 2.16E-01 | -1.63 | 9.49E-01 |
| EPX      | 0.42 | 3.36E-01 | 0.40  | 3.44E-01 | -0.11 | 5.44E-01 |
| DPYSL5   | 0.42 | 3.36E-01 | 0.86  | 1.95E-01 | -1.15 | 8.76E-01 |
| FAM83E   | 0.42 | 3.36E-01 | -0.53 | 7.01E-01 | 0.06  | 4.77E-01 |
| BNIP3    | 0.42 | 3.36E-01 | 1.11  | 1.35E-01 | -1.47 | 9.29E-01 |
| EPOR     | 0.42 | 3.36E-01 | -1.04 | 8.50E-01 | 1.28  | 1.00E-01 |
| FCN2     | 0.42 | 3.36E-01 | 0.51  | 3.04E-01 | -1.13 | 8.71E-01 |
| LRP2BP   | 0.42 | 3.36E-01 | -0.63 | 7.36E-01 | 0.01  | 4.94E-01 |
| ANLN     | 0.42 | 3.36E-01 | -0.72 | 7.64E-01 | -0.13 | 5.53E-01 |
| UBE2D2   | 0.42 | 3.36E-01 | -0.21 | 5.84E-01 | 1.22  | 1.11E-01 |
| CDRT4    | 0.42 | 3.36E-01 | -0.13 | 5.53E-01 | -0.22 | 5.87E-01 |
| GREM1    | 0.42 | 3.37E-01 | -0.05 | 5.19E-01 | -0.02 | 5.10E-01 |
| ANKRD60  | 0.42 | 3.37E-01 | -0.74 | 7.70E-01 | 0.50  | 3.07E-01 |
| SLC6A18  | 0.42 | 3.37E-01 | -1.05 | 8.54E-01 | 1.20  | 1.14E-01 |
| BEND7    | 0.42 | 3.37E-01 | -0.18 | 5.71E-01 | 0.99  | 1.61E-01 |
| FAM129B  | 0.42 | 3.37E-01 | 1.05  | 1.46E-01 | 0.18  | 4.29E-01 |
| FNBP1L   | 0.42 | 3.37E-01 | -0.34 | 6.33E-01 | 2.23  | 1.30E-02 |
| RGS4     | 0.42 | 3.37E-01 | 0.19  | 4.23E-01 | -1.00 | 8.42E-01 |
| ANKRD23  | 0.42 | 3.37E-01 | 2.20  | 1.39E-02 | 0.79  | 2.15E-01 |
| TMED1    | 0.42 | 3.37E-01 | 1.16  | 1.23E-01 | -0.60 | 7.27E-01 |

|              |      |          |       |          |       |          |
|--------------|------|----------|-------|----------|-------|----------|
| FIP1L1       | 0.42 | 3.37E-01 | -0.78 | 7.82E-01 | 1.07  | 1.43E-01 |
| ENTPD6       | 0.42 | 3.37E-01 | -1.62 | 9.47E-01 | 1.62  | 5.31E-02 |
| DUSP3        | 0.42 | 3.37E-01 | 1.46  | 7.22E-02 | -1.79 | 9.63E-01 |
| BMF          | 0.42 | 3.37E-01 | -0.57 | 7.16E-01 | 0.18  | 4.28E-01 |
| CTRB2        | 0.42 | 3.37E-01 | -0.46 | 6.77E-01 | 0.61  | 2.73E-01 |
| KLF13        | 0.42 | 3.37E-01 | 0.49  | 3.13E-01 | 0.49  | 3.11E-01 |
| TMEM175      | 0.42 | 3.37E-01 | -0.58 | 7.18E-01 | 1.25  | 1.05E-01 |
| COPZ2        | 0.42 | 3.37E-01 | 1.71  | 4.37E-02 | -0.25 | 5.98E-01 |
| LRRC3        | 0.42 | 3.37E-01 | 1.26  | 1.03E-01 | -1.72 | 9.57E-01 |
| ZNF653       | 0.42 | 3.37E-01 | -1.03 | 8.50E-01 | 0.82  | 2.06E-01 |
| TRIP6        | 0.42 | 3.37E-01 | 0.00  | 4.99E-01 | -0.37 | 6.46E-01 |
| ZNF441       | 0.42 | 3.37E-01 | 0.20  | 4.21E-01 | -0.58 | 7.17E-01 |
| SLC25A38     | 0.42 | 3.37E-01 | 1.19  | 1.17E-01 | -0.50 | 6.91E-01 |
| CSPP1        | 0.42 | 3.37E-01 | 0.20  | 4.19E-01 | -0.59 | 7.21E-01 |
| ALKBH8       | 0.42 | 3.37E-01 | 1.33  | 9.18E-02 | -1.83 | 9.67E-01 |
| TTC39B       | 0.42 | 3.38E-01 | -0.05 | 5.20E-01 | -0.84 | 7.98E-01 |
| STXBP6       | 0.42 | 3.38E-01 | -0.16 | 5.63E-01 | 0.57  | 2.85E-01 |
| APOL1        | 0.42 | 3.38E-01 | 0.56  | 2.88E-01 | 0.16  | 4.36E-01 |
| GRM8         | 0.42 | 3.38E-01 | 2.74  | 3.09E-03 | 1.08  | 1.40E-01 |
| HTATIP2      | 0.42 | 3.38E-01 | -1.04 | 8.51E-01 | 1.52  | 6.48E-02 |
| NFIA         | 0.42 | 3.38E-01 | -0.35 | 6.37E-01 | -0.28 | 6.10E-01 |
| CD70         | 0.42 | 3.38E-01 | 0.39  | 3.50E-01 | -0.35 | 6.37E-01 |
| FAM200A      | 0.42 | 3.38E-01 | -0.39 | 6.52E-01 | 0.17  | 4.33E-01 |
| RPA3-AS1     | 0.42 | 3.38E-01 | 0.66  | 2.54E-01 | 1.62  | 5.25E-02 |
| USP14        | 0.42 | 3.38E-01 | 0.67  | 2.52E-01 | 1.30  | 9.76E-02 |
| RP11-156P1.2 | 0.42 | 3.38E-01 | 0.26  | 3.98E-01 | 0.32  | 3.75E-01 |
| EIF4E2       | 0.42 | 3.38E-01 | -0.83 | 7.97E-01 | 0.71  | 2.38E-01 |
| HOXA4        | 0.42 | 3.38E-01 | 1.05  | 1.48E-01 | -2.30 | 9.89E-01 |
| SCLT1        | 0.42 | 3.38E-01 | 0.88  | 1.89E-01 | -1.04 | 8.51E-01 |
| FCGBP        | 0.42 | 3.38E-01 | 1.09  | 1.37E-01 | -1.21 | 8.87E-01 |
| TET3         | 0.42 | 3.38E-01 | -1.55 | 9.39E-01 | 1.63  | 5.19E-02 |

|         |      |          |       |          |       |          |
|---------|------|----------|-------|----------|-------|----------|
| IGF1R   | 0.42 | 3.38E-01 | 0.90  | 1.85E-01 | 0.71  | 2.38E-01 |
| NPAS2   | 0.42 | 3.38E-01 | -1.04 | 8.52E-01 | 1.96  | 2.52E-02 |
| RGS21   | 0.42 | 3.39E-01 | 1.29  | 9.87E-02 | 0.61  | 2.70E-01 |
| CRNN    | 0.42 | 3.39E-01 | 0.36  | 3.58E-01 | 0.03  | 4.89E-01 |
| EPPIN   | 0.42 | 3.39E-01 | -0.17 | 5.69E-01 | -0.30 | 6.19E-01 |
| TTPAL   | 0.42 | 3.39E-01 | -0.53 | 7.01E-01 | 1.27  | 1.02E-01 |
| PTCHD2  | 0.42 | 3.39E-01 | -0.57 | 7.15E-01 | 0.21  | 4.15E-01 |
| HECA    | 0.42 | 3.39E-01 | -1.12 | 8.69E-01 | 0.85  | 1.98E-01 |
| AARD    | 0.42 | 3.39E-01 | -1.37 | 9.14E-01 | 0.96  | 1.68E-01 |
| TTC21A  | 0.42 | 3.39E-01 | -0.29 | 6.12E-01 | 0.76  | 2.24E-01 |
| GFER    | 0.42 | 3.39E-01 | 1.17  | 1.22E-01 | -1.40 | 9.19E-01 |
| GP6     | 0.41 | 3.39E-01 | -0.88 | 8.10E-01 | 0.55  | 2.90E-01 |
| TLL2    | 0.41 | 3.39E-01 | 1.00  | 1.59E-01 | -0.46 | 6.76E-01 |
| GP5     | 0.41 | 3.39E-01 | -0.21 | 5.84E-01 | 1.64  | 5.09E-02 |
| EMC8    | 0.41 | 3.39E-01 | -0.06 | 5.23E-01 | 0.94  | 1.72E-01 |
| NEIL3   | 0.41 | 3.39E-01 | -0.02 | 5.08E-01 | 0.53  | 2.97E-01 |
| HTRA2   | 0.41 | 3.39E-01 | 0.73  | 2.33E-01 | -0.81 | 7.91E-01 |
| DLEU1   | 0.41 | 3.39E-01 | 0.25  | 4.01E-01 | 0.72  | 2.35E-01 |
| ST6GAL1 | 0.41 | 3.39E-01 | -0.46 | 6.76E-01 | 1.56  | 5.91E-02 |
| KCNF1   | 0.41 | 3.39E-01 | 1.11  | 1.33E-01 | -1.25 | 8.95E-01 |
| IAH1    | 0.41 | 3.39E-01 | -0.44 | 6.70E-01 | 1.70  | 4.47E-02 |
| TMEM65  | 0.41 | 3.39E-01 | 0.47  | 3.18E-01 | -1.10 | 8.64E-01 |
| RRAD    | 0.41 | 3.39E-01 | -0.85 | 8.01E-01 | 0.76  | 2.23E-01 |
| GBP7    | 0.41 | 3.39E-01 | 0.83  | 2.03E-01 | -0.60 | 7.27E-01 |
| RIPK3   | 0.41 | 3.40E-01 | -1.86 | 9.69E-01 | 0.94  | 1.74E-01 |
| PUM1    | 0.41 | 3.40E-01 | 0.20  | 4.21E-01 | 0.51  | 3.06E-01 |
| ICA1    | 0.41 | 3.40E-01 | -0.49 | 6.89E-01 | 0.30  | 3.80E-01 |
| MECR    | 0.41 | 3.40E-01 | -0.24 | 5.96E-01 | -0.23 | 5.90E-01 |
| DKK4    | 0.41 | 3.40E-01 | 0.42  | 3.37E-01 | -1.10 | 8.64E-01 |
| ZNF385B | 0.41 | 3.40E-01 | 0.81  | 2.10E-01 | -1.03 | 8.48E-01 |
| SNRPE   | 0.41 | 3.40E-01 | -1.70 | 9.55E-01 | 0.99  | 1.62E-01 |

|          |      |          |       |          |       |          |
|----------|------|----------|-------|----------|-------|----------|
| C3orf17  | 0.41 | 3.40E-01 | 0.25  | 4.01E-01 | -0.90 | 8.17E-01 |
| C9orf129 | 0.41 | 3.40E-01 | 0.33  | 3.71E-01 | -1.18 | 8.81E-01 |
| RNASEH2A | 0.41 | 3.40E-01 | -0.81 | 7.92E-01 | 0.55  | 2.93E-01 |
| TPPP3    | 0.41 | 3.40E-01 | -1.66 | 9.52E-01 | 1.12  | 1.32E-01 |
| HSPA6    | 0.41 | 3.40E-01 | 0.91  | 1.81E-01 | -2.34 | 9.90E-01 |
| GADD45A  | 0.41 | 3.40E-01 | 0.22  | 4.12E-01 | -0.44 | 6.71E-01 |
| ANKRD50  | 0.41 | 3.40E-01 | -1.51 | 9.34E-01 | 1.20  | 1.15E-01 |
| RTN4RL2  | 0.41 | 3.40E-01 | 0.48  | 3.14E-01 | -0.69 | 7.56E-01 |
| ADAMTS14 | 0.41 | 3.41E-01 | -0.38 | 6.49E-01 | 0.13  | 4.47E-01 |
| NRBP2    | 0.41 | 3.41E-01 | 0.44  | 3.31E-01 | -0.70 | 7.57E-01 |
| LHX4     | 0.41 | 3.41E-01 | 1.11  | 1.34E-01 | 0.46  | 3.23E-01 |
| ZFC3H1   | 0.41 | 3.41E-01 | -0.70 | 7.59E-01 | 0.80  | 2.13E-01 |
| WNT2B    | 0.41 | 3.41E-01 | 0.36  | 3.60E-01 | -1.17 | 8.78E-01 |
| SHANK1   | 0.41 | 3.41E-01 | 0.19  | 4.26E-01 | 0.02  | 4.94E-01 |
| SPATA13  | 0.41 | 3.41E-01 | 0.48  | 3.16E-01 | -0.05 | 5.20E-01 |
| LIMA1    | 0.41 | 3.41E-01 | 0.57  | 2.83E-01 | -0.29 | 6.15E-01 |
| ZNF624   | 0.41 | 3.41E-01 | 1.04  | 1.50E-01 | -0.88 | 8.11E-01 |
| WBSCR22  | 0.41 | 3.41E-01 | 0.75  | 2.26E-01 | -0.72 | 7.65E-01 |
| LY96     | 0.41 | 3.41E-01 | -0.72 | 7.65E-01 | 0.37  | 3.55E-01 |
| NPTX1    | 0.41 | 3.41E-01 | -0.25 | 5.98E-01 | 0.86  | 1.95E-01 |
| BCS1L    | 0.41 | 3.41E-01 | -0.69 | 7.53E-01 | 0.76  | 2.25E-01 |
| CTGF     | 0.41 | 3.41E-01 | 0.59  | 2.79E-01 | -0.58 | 7.20E-01 |
| PDZD9    | 0.41 | 3.41E-01 | 0.86  | 1.95E-01 | 0.09  | 4.65E-01 |
| ENG      | 0.41 | 3.41E-01 | -0.78 | 7.82E-01 | -0.14 | 5.56E-01 |
| SLC39A14 | 0.41 | 3.41E-01 | -0.31 | 6.22E-01 | 2.60  | 4.72E-03 |
| KHDC1L   | 0.41 | 3.41E-01 | -1.20 | 8.85E-01 | 0.76  | 2.23E-01 |
| JADE2    | 0.41 | 3.41E-01 | 0.54  | 2.94E-01 | -0.97 | 8.34E-01 |
| CATSPERD | 0.41 | 3.41E-01 | -0.63 | 7.36E-01 | 0.04  | 4.85E-01 |
| IL36RN   | 0.41 | 3.41E-01 | 0.23  | 4.10E-01 | 0.02  | 4.91E-01 |
| ZNF329   | 0.41 | 3.42E-01 | -0.01 | 5.04E-01 | 0.04  | 4.83E-01 |
| RAB22A   | 0.41 | 3.42E-01 | -0.85 | 8.01E-01 | 0.58  | 2.81E-01 |

|              |      |          |       |          |       |          |
|--------------|------|----------|-------|----------|-------|----------|
| ESR2         | 0.41 | 3.42E-01 | 2.17  | 1.50E-02 | 1.22  | 1.12E-01 |
| ZNF664       | 0.41 | 3.42E-01 | 0.18  | 4.30E-01 | 1.08  | 1.41E-01 |
| NOTCH2       | 0.41 | 3.42E-01 | 0.29  | 3.86E-01 | -0.12 | 5.49E-01 |
| ZBTB25       | 0.41 | 3.42E-01 | 0.12  | 4.51E-01 | -0.74 | 7.70E-01 |
| CCDC90B      | 0.41 | 3.42E-01 | -1.64 | 9.49E-01 | 1.49  | 6.84E-02 |
| COASY        | 0.41 | 3.42E-01 | -0.32 | 6.25E-01 | 0.07  | 4.73E-01 |
| ELP3         | 0.41 | 3.42E-01 | -0.07 | 5.27E-01 | 0.03  | 4.88E-01 |
| KRT36        | 0.41 | 3.42E-01 | -0.51 | 6.95E-01 | 0.02  | 4.92E-01 |
| ORC6         | 0.41 | 3.42E-01 | -0.92 | 8.21E-01 | 0.33  | 3.72E-01 |
| SAPCD2       | 0.41 | 3.42E-01 | -0.09 | 5.35E-01 | 0.27  | 3.92E-01 |
| SUCNR1       | 0.41 | 3.42E-01 | 0.32  | 3.74E-01 | -0.66 | 7.47E-01 |
| PTGIS        | 0.41 | 3.42E-01 | 0.62  | 2.67E-01 | -0.14 | 5.54E-01 |
| MAP2K5       | 0.41 | 3.42E-01 | 0.67  | 2.52E-01 | 0.13  | 4.48E-01 |
| TMEM207      | 0.41 | 3.42E-01 | 0.20  | 4.20E-01 | 0.13  | 4.48E-01 |
| MT2A         | 0.41 | 3.42E-01 | -0.49 | 6.88E-01 | 0.87  | 1.93E-01 |
| SPATA31E1    | 0.41 | 3.42E-01 | -0.52 | 6.97E-01 | 0.39  | 3.49E-01 |
| NFIB         | 0.41 | 3.42E-01 | 0.64  | 2.61E-01 | 0.84  | 2.01E-01 |
| PECR         | 0.41 | 3.43E-01 | -0.60 | 7.24E-01 | 2.16  | 1.54E-02 |
| HIBADH       | 0.41 | 3.43E-01 | 0.38  | 3.52E-01 | -0.05 | 5.20E-01 |
| SLC1A6       | 0.41 | 3.43E-01 | 1.53  | 6.24E-02 | 0.33  | 3.70E-01 |
| GOSR2        | 0.41 | 3.43E-01 | 0.21  | 4.16E-01 | 0.33  | 3.69E-01 |
| GJD4         | 0.41 | 3.43E-01 | 1.91  | 2.83E-02 | 0.48  | 3.14E-01 |
| EIF3K        | 0.41 | 3.43E-01 | 0.57  | 2.85E-01 | 0.06  | 4.76E-01 |
| SHMT1        | 0.41 | 3.43E-01 | 0.59  | 2.79E-01 | -0.70 | 7.57E-01 |
| TVP23C-CDRT4 | 0.41 | 3.43E-01 | -0.20 | 5.78E-01 | -0.28 | 6.09E-01 |
| C5orf46      | 0.40 | 3.43E-01 | 0.39  | 3.47E-01 | -1.05 | 8.52E-01 |
| ZNF33B       | 0.40 | 3.43E-01 | 0.32  | 3.73E-01 | -0.89 | 8.14E-01 |
| GPR61        | 0.40 | 3.43E-01 | 1.41  | 7.90E-02 | -2.03 | 9.79E-01 |
| ZNF641       | 0.40 | 3.43E-01 | 0.24  | 4.06E-01 | -0.92 | 8.21E-01 |
| CKMT1B       | 0.40 | 3.43E-01 | 0.93  | 1.75E-01 | -0.06 | 5.24E-01 |
| SPTSSA       | 0.40 | 3.43E-01 | 0.97  | 1.65E-01 | -0.95 | 8.28E-01 |



|           |      |          |       |          |       |          |
|-----------|------|----------|-------|----------|-------|----------|
| HSD11B2   | 0.40 | 3.43E-01 | -1.46 | 9.27E-01 | 1.01  | 1.55E-01 |
| DNAL1     | 0.40 | 3.43E-01 | 0.14  | 4.44E-01 | 0.80  | 2.13E-01 |
| CAMSAP3   | 0.40 | 3.43E-01 | 0.70  | 2.41E-01 | -1.10 | 8.64E-01 |
| LRP5L     | 0.40 | 3.43E-01 | 0.22  | 4.11E-01 | -0.25 | 5.97E-01 |
| ZNF676    | 0.40 | 3.43E-01 | 0.25  | 4.01E-01 | -0.43 | 6.67E-01 |
| HEBP2     | 0.40 | 3.43E-01 | 0.37  | 3.57E-01 | 1.41  | 7.98E-02 |
| RGS14     | 0.40 | 3.43E-01 | -0.32 | 6.27E-01 | -0.06 | 5.22E-01 |
| PDSS2     | 0.40 | 3.43E-01 | -0.58 | 7.19E-01 | -0.29 | 6.13E-01 |
| IGFL1     | 0.40 | 3.44E-01 | -0.33 | 6.30E-01 | 0.45  | 3.26E-01 |
| PACSIN1   | 0.40 | 3.44E-01 | 0.71  | 2.40E-01 | -0.15 | 5.60E-01 |
| CTBP2     | 0.40 | 3.44E-01 | 0.35  | 3.64E-01 | -0.35 | 6.38E-01 |
| SLC28A3   | 0.40 | 3.44E-01 | 1.49  | 6.85E-02 | 0.96  | 1.69E-01 |
| CARF      | 0.40 | 3.44E-01 | -0.25 | 5.98E-01 | -0.14 | 5.57E-01 |
| WDR12     | 0.40 | 3.44E-01 | -0.26 | 6.02E-01 | -0.25 | 5.99E-01 |
| INTS2     | 0.40 | 3.44E-01 | 0.66  | 2.56E-01 | -0.46 | 6.77E-01 |
| C20orf194 | 0.40 | 3.44E-01 | 1.11  | 1.33E-01 | -1.79 | 9.64E-01 |
| SKIL      | 0.40 | 3.44E-01 | 0.99  | 1.61E-01 | -0.68 | 7.50E-01 |
| TARDBP    | 0.40 | 3.44E-01 | 1.27  | 1.03E-01 | -0.02 | 5.10E-01 |
| HERPUD1   | 0.40 | 3.44E-01 | 0.79  | 2.16E-01 | 3.16  | 7.90E-04 |
| PTCD1     | 0.40 | 3.44E-01 | -0.27 | 6.05E-01 | -0.18 | 5.72E-01 |
| TCTEX1D1  | 0.40 | 3.44E-01 | 0.79  | 2.15E-01 | 0.27  | 3.95E-01 |
| SDR16C5   | 0.40 | 3.44E-01 | 1.04  | 1.50E-01 | 0.57  | 2.83E-01 |
| PILRA     | 0.40 | 3.44E-01 | -0.23 | 5.92E-01 | 0.04  | 4.83E-01 |
| NPIPA5    | 0.40 | 3.44E-01 | -2.17 | 9.85E-01 | 1.10  | 1.36E-01 |
| PLAC8     | 0.40 | 3.45E-01 | 0.75  | 2.27E-01 | -1.72 | 9.57E-01 |
| THEGL     | 0.40 | 3.45E-01 | -1.57 | 9.42E-01 | 1.15  | 1.25E-01 |
| CREB5     | 0.40 | 3.45E-01 | -0.80 | 7.90E-01 | 0.66  | 2.55E-01 |
| PMEL      | 0.40 | 3.45E-01 | 0.09  | 4.63E-01 | 0.70  | 2.43E-01 |
| AATK      | 0.40 | 3.45E-01 | -0.03 | 5.12E-01 | 0.07  | 4.73E-01 |
| SMIM19    | 0.40 | 3.45E-01 | -1.12 | 8.69E-01 | 0.62  | 2.68E-01 |
| PDE8B     | 0.40 | 3.45E-01 | 0.11  | 4.55E-01 | 0.26  | 3.96E-01 |

|          |      |          |       |          |       |          |
|----------|------|----------|-------|----------|-------|----------|
| TCERG1   | 0.40 | 3.45E-01 | 0.52  | 3.03E-01 | -0.65 | 7.43E-01 |
| HSD11B1  | 0.40 | 3.45E-01 | -0.68 | 7.53E-01 | 1.27  | 1.02E-01 |
| TBC1D8   | 0.40 | 3.45E-01 | -0.26 | 6.04E-01 | 0.49  | 3.11E-01 |
| NFIL3    | 0.40 | 3.45E-01 | 0.47  | 3.18E-01 | -0.35 | 6.35E-01 |
| GPR97    | 0.40 | 3.45E-01 | 0.35  | 3.65E-01 | -0.37 | 6.46E-01 |
| C9orf91  | 0.40 | 3.45E-01 | 0.36  | 3.59E-01 | -1.03 | 8.48E-01 |
| COL20A1  | 0.40 | 3.45E-01 | -0.94 | 8.27E-01 | 0.67  | 2.50E-01 |
| C7orf34  | 0.40 | 3.45E-01 | -0.79 | 7.85E-01 | 1.00  | 1.58E-01 |
| FAM131C  | 0.40 | 3.45E-01 | 0.31  | 3.77E-01 | -0.37 | 6.43E-01 |
| FAM105B  | 0.40 | 3.45E-01 | 0.12  | 4.52E-01 | 0.54  | 2.93E-01 |
| STX17    | 0.40 | 3.45E-01 | -0.87 | 8.09E-01 | 0.92  | 1.80E-01 |
| MGRN1    | 0.40 | 3.45E-01 | 0.43  | 3.32E-01 | 0.92  | 1.79E-01 |
| CDX1     | 0.40 | 3.46E-01 | -0.19 | 5.75E-01 | 0.50  | 3.07E-01 |
| TMOD3    | 0.40 | 3.46E-01 | -1.30 | 9.04E-01 | 1.62  | 5.23E-02 |
| RAD54L2  | 0.40 | 3.46E-01 | -0.31 | 6.22E-01 | -0.17 | 5.66E-01 |
| ZNF669   | 0.40 | 3.46E-01 | 0.70  | 2.41E-01 | -1.15 | 8.74E-01 |
| OR51A7   | 0.40 | 3.46E-01 | 0.04  | 4.84E-01 | 0.21  | 4.15E-01 |
| FAM63B   | 0.40 | 3.46E-01 | -0.34 | 6.32E-01 | 1.03  | 1.51E-01 |
| OR10C1   | 0.40 | 3.46E-01 | -0.57 | 7.14E-01 | 1.01  | 1.55E-01 |
| REPS1    | 0.40 | 3.46E-01 | 0.98  | 1.64E-01 | 1.31  | 9.57E-02 |
| ZNF428   | 0.40 | 3.46E-01 | -0.68 | 7.50E-01 | -0.30 | 6.17E-01 |
| CRTC1    | 0.40 | 3.46E-01 | 1.85  | 3.24E-02 | -0.64 | 7.39E-01 |
| KCTD6    | 0.40 | 3.46E-01 | 2.11  | 1.74E-02 | 0.60  | 2.74E-01 |
| NELL1    | 0.40 | 3.46E-01 | 1.66  | 4.87E-02 | -2.11 | 9.82E-01 |
| ADRB1    | 0.40 | 3.46E-01 | -0.66 | 7.46E-01 | 1.11  | 1.33E-01 |
| SAG      | 0.40 | 3.46E-01 | 0.55  | 2.91E-01 | 0.37  | 3.56E-01 |
| KIAA1586 | 0.40 | 3.46E-01 | 0.29  | 3.85E-01 | -0.49 | 6.89E-01 |
| EPPK1    | 0.39 | 3.47E-01 | 1.08  | 1.39E-01 | -0.84 | 8.00E-01 |
| CSN1S1   | 0.39 | 3.47E-01 | -0.62 | 7.33E-01 | -0.01 | 5.03E-01 |
| ZSCAN5B  | 0.39 | 3.47E-01 | 0.15  | 4.41E-01 | -0.05 | 5.21E-01 |
| ZNF334   | 0.39 | 3.47E-01 | 0.97  | 1.66E-01 | -0.10 | 5.41E-01 |

|         |      |          |       |          |       |          |
|---------|------|----------|-------|----------|-------|----------|
| ZCCHC9  | 0.39 | 3.47E-01 | 0.17  | 4.33E-01 | 0.44  | 3.29E-01 |
| FANCI   | 0.39 | 3.47E-01 | 1.97  | 2.44E-02 | 0.21  | 4.18E-01 |
| MARGPRE | 0.39 | 3.47E-01 | 0.86  | 1.94E-01 | -1.14 | 8.73E-01 |
| LIN52   | 0.39 | 3.47E-01 | -0.61 | 7.28E-01 | 0.79  | 2.15E-01 |
| ZMAT2   | 0.39 | 3.47E-01 | -0.59 | 7.21E-01 | 0.35  | 3.64E-01 |
| RPL24   | 0.39 | 3.47E-01 | 0.16  | 4.36E-01 | 0.28  | 3.89E-01 |
| DEFB121 | 0.39 | 3.47E-01 | 2.00  | 2.29E-02 | 1.10  | 1.35E-01 |
| HMG20A  | 0.39 | 3.47E-01 | -1.13 | 8.71E-01 | 0.63  | 2.63E-01 |
| LRFN3   | 0.39 | 3.47E-01 | -0.34 | 6.34E-01 | 0.40  | 3.46E-01 |
| LATS1   | 0.39 | 3.47E-01 | -0.50 | 6.92E-01 | 0.39  | 3.48E-01 |
| UGT2B10 | 0.39 | 3.47E-01 | -0.29 | 6.15E-01 | -0.16 | 5.64E-01 |
| BBIP1   | 0.39 | 3.48E-01 | 1.07  | 1.43E-01 | 0.25  | 4.01E-01 |
| SF3A1   | 0.39 | 3.48E-01 | 1.52  | 6.43E-02 | -2.03 | 9.79E-01 |
| SEMG1   | 0.39 | 3.48E-01 | 0.14  | 4.44E-01 | -0.85 | 8.02E-01 |
| GTPBP3  | 0.39 | 3.48E-01 | 1.76  | 3.95E-02 | 0.62  | 2.69E-01 |
| MAPRE3  | 0.39 | 3.48E-01 | 1.28  | 9.95E-02 | -0.31 | 6.23E-01 |
| MLPH    | 0.39 | 3.48E-01 | -1.69 | 9.54E-01 | 1.32  | 9.39E-02 |
| PDCL3   | 0.39 | 3.48E-01 | 0.36  | 3.59E-01 | -0.41 | 6.60E-01 |
| MPDU1   | 0.39 | 3.48E-01 | 1.36  | 8.62E-02 | -0.14 | 5.56E-01 |
| HK1     | 0.39 | 3.48E-01 | 1.08  | 1.40E-01 | 0.29  | 3.85E-01 |
| HMOX1   | 0.39 | 3.48E-01 | 0.19  | 4.24E-01 | -0.61 | 7.29E-01 |
| DCDC2C  | 0.39 | 3.48E-01 | -0.43 | 6.66E-01 | 0.82  | 2.06E-01 |
| MBD4    | 0.39 | 3.48E-01 | -1.45 | 9.26E-01 | 1.23  | 1.10E-01 |
| ANKZF1  | 0.39 | 3.49E-01 | 0.25  | 4.03E-01 | -0.38 | 6.48E-01 |
| ZNF24   | 0.39 | 3.49E-01 | -1.42 | 9.22E-01 | 1.72  | 4.25E-02 |
| NAGA    | 0.39 | 3.49E-01 | 1.25  | 1.07E-01 | -0.48 | 6.85E-01 |
| PLCZ1   | 0.39 | 3.49E-01 | 0.37  | 3.57E-01 | 2.17  | 1.49E-02 |
| TRAIP   | 0.39 | 3.49E-01 | -1.55 | 9.40E-01 | 1.31  | 9.55E-02 |
| C1S     | 0.39 | 3.49E-01 | -1.12 | 8.69E-01 | 1.64  | 5.01E-02 |
| TIMM23  | 0.39 | 3.49E-01 | 1.10  | 1.35E-01 | -0.93 | 8.24E-01 |
| FMN2    | 0.39 | 3.49E-01 | 0.46  | 3.24E-01 | 0.35  | 3.65E-01 |

|           |      |          |       |          |       |          |
|-----------|------|----------|-------|----------|-------|----------|
| CAMK1G    | 0.39 | 3.49E-01 | 0.98  | 1.63E-01 | -0.20 | 5.80E-01 |
| MADCAM1   | 0.39 | 3.49E-01 | 1.14  | 1.28E-01 | -2.27 | 9.88E-01 |
| DRGX      | 0.39 | 3.49E-01 | 0.92  | 1.79E-01 | -1.08 | 8.60E-01 |
| GTPBP4    | 0.39 | 3.49E-01 | -0.88 | 8.10E-01 | 1.05  | 1.48E-01 |
| DEK       | 0.39 | 3.49E-01 | -0.21 | 5.83E-01 | -0.01 | 5.03E-01 |
| CCL3      | 0.39 | 3.50E-01 | 1.37  | 8.51E-02 | -0.10 | 5.40E-01 |
| GPS1      | 0.39 | 3.50E-01 | 1.09  | 1.38E-01 | -0.93 | 8.25E-01 |
| ADAMTS2   | 0.39 | 3.50E-01 | 1.04  | 1.49E-01 | -0.74 | 7.71E-01 |
| CDK13     | 0.39 | 3.50E-01 | 0.55  | 2.92E-01 | -1.53 | 9.38E-01 |
| DEF8      | 0.39 | 3.50E-01 | 0.97  | 1.66E-01 | -0.43 | 6.67E-01 |
| BLOC1S1   | 0.39 | 3.50E-01 | 0.78  | 2.18E-01 | -1.68 | 9.53E-01 |
| IL1RL1    | 0.39 | 3.50E-01 | 1.32  | 9.41E-02 | -1.75 | 9.60E-01 |
| SLC30A1   | 0.39 | 3.50E-01 | -0.01 | 5.03E-01 | 1.29  | 9.84E-02 |
| C17orf100 | 0.39 | 3.50E-01 | 2.06  | 1.99E-02 | 0.03  | 4.88E-01 |
| MST1      | 0.38 | 3.50E-01 | 0.15  | 4.40E-01 | 2.60  | 4.64E-03 |
| PKDCC     | 0.38 | 3.50E-01 | 0.74  | 2.31E-01 | -0.94 | 8.26E-01 |
| ZNF200    | 0.38 | 3.50E-01 | -0.82 | 7.93E-01 | 0.45  | 3.27E-01 |
| C4orf19   | 0.38 | 3.50E-01 | 0.17  | 4.31E-01 | -0.02 | 5.09E-01 |
| ALDH1B1   | 0.38 | 3.50E-01 | -0.39 | 6.51E-01 | -0.43 | 6.66E-01 |
| HIST1H2AD | 0.38 | 3.50E-01 | 0.17  | 4.31E-01 | 1.82  | 3.44E-02 |
| PPP1CA    | 0.38 | 3.50E-01 | 2.26  | 1.20E-02 | 1.14  | 1.28E-01 |
| TMEM155   | 0.38 | 3.51E-01 | -0.11 | 5.44E-01 | -0.08 | 5.31E-01 |
| RPL14     | 0.38 | 3.51E-01 | 1.25  | 1.06E-01 | -0.89 | 8.12E-01 |
| DCAF16    | 0.38 | 3.51E-01 | 0.65  | 2.57E-01 | 1.24  | 1.08E-01 |
| MAP3K2    | 0.38 | 3.51E-01 | -0.75 | 7.73E-01 | 0.65  | 2.59E-01 |
| DKK1      | 0.38 | 3.51E-01 | 0.42  | 3.37E-01 | 0.21  | 4.19E-01 |
| SPATS2    | 0.38 | 3.51E-01 | 0.61  | 2.72E-01 | 1.06  | 1.44E-01 |
| OLFM2     | 0.38 | 3.51E-01 | -0.43 | 6.66E-01 | 0.72  | 2.37E-01 |
| SAMD4B    | 0.38 | 3.51E-01 | 0.27  | 3.93E-01 | 0.17  | 4.33E-01 |
| RABL2A    | 0.38 | 3.51E-01 | -1.49 | 9.32E-01 | 1.04  | 1.50E-01 |
| TPP1      | 0.38 | 3.51E-01 | -0.76 | 7.75E-01 | 0.72  | 2.34E-01 |

|              |      |          |       |          |       |          |
|--------------|------|----------|-------|----------|-------|----------|
| CA1          | 0.38 | 3.51E-01 | -0.68 | 7.53E-01 | -0.19 | 5.75E-01 |
| ATXN7L2      | 0.38 | 3.51E-01 | -0.63 | 7.36E-01 | 2.29  | 1.09E-02 |
| WDR53        | 0.38 | 3.51E-01 | 0.79  | 2.16E-01 | -1.05 | 8.54E-01 |
| NPAS1        | 0.38 | 3.51E-01 | 1.96  | 2.51E-02 | -0.37 | 6.45E-01 |
| DHX9         | 0.38 | 3.51E-01 | 0.36  | 3.58E-01 | -0.80 | 7.88E-01 |
| SACS         | 0.38 | 3.51E-01 | 0.84  | 2.01E-01 | 1.30  | 9.67E-02 |
| QRFPR        | 0.38 | 3.51E-01 | 0.99  | 1.62E-01 | 0.15  | 4.42E-01 |
| C4orf36      | 0.38 | 3.51E-01 | 0.27  | 3.94E-01 | 0.79  | 2.14E-01 |
| ZSWIM7       | 0.38 | 3.51E-01 | -1.15 | 8.76E-01 | 0.60  | 2.76E-01 |
| ADCYAP1R1    | 0.38 | 3.52E-01 | 0.42  | 3.37E-01 | -0.34 | 6.33E-01 |
| TXNDC12      | 0.38 | 3.52E-01 | -0.06 | 5.25E-01 | 0.20  | 4.21E-01 |
| COLQ         | 0.38 | 3.52E-01 | -0.86 | 8.04E-01 | 0.68  | 2.49E-01 |
| FRRS1        | 0.38 | 3.52E-01 | 0.53  | 2.99E-01 | -1.17 | 8.79E-01 |
| ING3         | 0.38 | 3.52E-01 | 0.91  | 1.82E-01 | -0.59 | 7.22E-01 |
| KRTAP5-5     | 0.38 | 3.52E-01 | 0.57  | 2.83E-01 | -0.83 | 7.96E-01 |
| NOVA1        | 0.38 | 3.52E-01 | 1.64  | 5.05E-02 | 2.03  | 2.10E-02 |
| KMT2B        | 0.38 | 3.52E-01 | -0.49 | 6.90E-01 | 1.79  | 3.66E-02 |
| KAZALD1      | 0.38 | 3.52E-01 | 0.82  | 2.07E-01 | -0.95 | 8.29E-01 |
| TRIM64C      | 0.38 | 3.52E-01 | 0.00  | 4.99E-01 | 0.39  | 3.50E-01 |
| DONSON       | 0.38 | 3.52E-01 | 0.79  | 2.15E-01 | -1.30 | 9.02E-01 |
| PIK3CD       | 0.38 | 3.52E-01 | -0.94 | 8.27E-01 | 1.69  | 4.56E-02 |
| RHPN1        | 0.38 | 3.52E-01 | -0.76 | 7.77E-01 | 0.60  | 2.75E-01 |
| COL21A1      | 0.38 | 3.52E-01 | 0.21  | 4.16E-01 | 0.69  | 2.44E-01 |
| CSTF3        | 0.38 | 3.52E-01 | 0.37  | 3.57E-01 | 0.52  | 3.03E-01 |
| EPHB1        | 0.38 | 3.52E-01 | -0.56 | 7.12E-01 | 0.72  | 2.37E-01 |
| CTC-236F12.4 | 0.38 | 3.52E-01 | -0.62 | 7.32E-01 | -0.12 | 5.47E-01 |
| NEURL1       | 0.38 | 3.52E-01 | 1.13  | 1.30E-01 | -0.04 | 5.17E-01 |
| LRBA         | 0.38 | 3.52E-01 | -0.17 | 5.68E-01 | -0.26 | 6.04E-01 |
| PHF3         | 0.38 | 3.52E-01 | -1.11 | 8.66E-01 | 1.01  | 1.56E-01 |
| S1PR2        | 0.38 | 3.52E-01 | 0.29  | 3.86E-01 | 0.81  | 2.10E-01 |
| CYP2F1       | 0.38 | 3.52E-01 | -0.33 | 6.27E-01 | -0.28 | 6.10E-01 |

|          |      |          |       |          |       |          |
|----------|------|----------|-------|----------|-------|----------|
| TOPAZ1   | 0.38 | 3.52E-01 | -0.08 | 5.30E-01 | -0.09 | 5.35E-01 |
| CLDN5    | 0.38 | 3.52E-01 | -0.25 | 5.97E-01 | 0.02  | 4.93E-01 |
| HGF      | 0.38 | 3.53E-01 | 0.08  | 4.70E-01 | -0.34 | 6.32E-01 |
| ALS2CR12 | 0.38 | 3.53E-01 | 1.25  | 1.06E-01 | -0.87 | 8.08E-01 |
| NRGN     | 0.38 | 3.53E-01 | 0.29  | 3.85E-01 | 0.60  | 2.73E-01 |
| FASTK    | 0.38 | 3.53E-01 | 0.72  | 2.37E-01 | -0.48 | 6.85E-01 |
| ZBTB10   | 0.38 | 3.53E-01 | -0.44 | 6.71E-01 | -0.30 | 6.19E-01 |
| TMEM194A | 0.38 | 3.53E-01 | -0.25 | 6.00E-01 | 1.39  | 8.21E-02 |
| CNBD2    | 0.38 | 3.53E-01 | -0.92 | 8.21E-01 | 0.47  | 3.20E-01 |
| ADAMDEC1 | 0.38 | 3.53E-01 | -0.67 | 7.50E-01 | 0.56  | 2.88E-01 |
| CABP5    | 0.38 | 3.53E-01 | 2.36  | 9.18E-03 | 0.24  | 4.05E-01 |
| C19orf48 | 0.38 | 3.53E-01 | 0.35  | 3.62E-01 | 0.41  | 3.42E-01 |
| SLCO6A1  | 0.38 | 3.53E-01 | 0.57  | 2.85E-01 | 2.23  | 1.30E-02 |
| CHTF8    | 0.38 | 3.53E-01 | -0.72 | 7.64E-01 | 0.01  | 4.95E-01 |
| PHC3     | 0.38 | 3.53E-01 | -0.86 | 8.04E-01 | 1.80  | 3.60E-02 |
| SORL1    | 0.38 | 3.53E-01 | 1.33  | 9.15E-02 | 1.20  | 1.14E-01 |
| C17orf82 | 0.38 | 3.53E-01 | -0.11 | 5.44E-01 | 0.18  | 4.27E-01 |
| CCDC15   | 0.38 | 3.54E-01 | 0.92  | 1.79E-01 | -0.64 | 7.40E-01 |
| ARID3A   | 0.38 | 3.54E-01 | -0.69 | 7.55E-01 | 2.78  | 2.70E-03 |
| PF4V1    | 0.37 | 3.54E-01 | 0.73  | 2.34E-01 | -0.01 | 5.04E-01 |
| AP1B1    | 0.37 | 3.54E-01 | -0.26 | 6.03E-01 | -0.01 | 5.03E-01 |
| SMIM5    | 0.37 | 3.54E-01 | -1.03 | 8.49E-01 | 1.45  | 7.32E-02 |
| AKR1C4   | 0.37 | 3.54E-01 | -0.77 | 7.81E-01 | 0.26  | 3.97E-01 |
| FGD2     | 0.37 | 3.54E-01 | 0.11  | 4.57E-01 | -0.42 | 6.63E-01 |
| SLAIN2   | 0.37 | 3.54E-01 | 0.35  | 3.63E-01 | -0.49 | 6.88E-01 |
| TOP1MT   | 0.37 | 3.54E-01 | -0.90 | 8.16E-01 | 1.43  | 7.62E-02 |
| THAP1    | 0.37 | 3.54E-01 | -1.19 | 8.83E-01 | 1.42  | 7.73E-02 |
| IARS2    | 0.37 | 3.54E-01 | -0.14 | 5.58E-01 | -0.79 | 7.86E-01 |
| OR10H1   | 0.37 | 3.54E-01 | 0.89  | 1.87E-01 | -0.85 | 8.02E-01 |
| GATSL3   | 0.37 | 3.54E-01 | 1.26  | 1.04E-01 | -1.81 | 9.65E-01 |
| NAT16    | 0.37 | 3.54E-01 | 0.39  | 3.47E-01 | -0.55 | 7.07E-01 |

|         |      |          |       |          |       |          |
|---------|------|----------|-------|----------|-------|----------|
| FBXW11  | 0.37 | 3.54E-01 | -1.47 | 9.29E-01 | 0.96  | 1.69E-01 |
| TNRC6A  | 0.37 | 3.54E-01 | 1.13  | 1.30E-01 | -0.91 | 8.18E-01 |
| TMEM202 | 0.37 | 3.54E-01 | 0.77  | 2.21E-01 | -1.20 | 8.85E-01 |
| DEFB127 | 0.37 | 3.54E-01 | 0.04  | 4.86E-01 | -0.09 | 5.35E-01 |
| TMTC3   | 0.37 | 3.55E-01 | 0.18  | 4.27E-01 | -0.29 | 6.14E-01 |
| CDADC1  | 0.37 | 3.55E-01 | 0.64  | 2.62E-01 | -1.49 | 9.32E-01 |
| MRGPRX1 | 0.37 | 3.55E-01 | 1.61  | 5.33E-02 | 0.35  | 3.62E-01 |
| PDE9A   | 0.37 | 3.55E-01 | -0.92 | 8.22E-01 | 2.26  | 1.18E-02 |
| BCCIP   | 0.37 | 3.55E-01 | 0.44  | 3.30E-01 | -0.42 | 6.64E-01 |
| CRYBG3  | 0.37 | 3.55E-01 | 0.61  | 2.70E-01 | -1.36 | 9.13E-01 |
| TLN1    | 0.37 | 3.55E-01 | 0.73  | 2.34E-01 | -1.18 | 8.80E-01 |
| ZNF830  | 0.37 | 3.55E-01 | 1.01  | 1.56E-01 | -0.33 | 6.28E-01 |
| FABP2   | 0.37 | 3.55E-01 | -0.24 | 5.95E-01 | -0.09 | 5.35E-01 |
| CPNE5   | 0.37 | 3.55E-01 | 0.06  | 4.76E-01 | 0.74  | 2.31E-01 |
| GIPC1   | 0.37 | 3.55E-01 | -0.82 | 7.93E-01 | 0.01  | 4.97E-01 |
| IFT122  | 0.37 | 3.55E-01 | -1.16 | 8.78E-01 | 1.09  | 1.39E-01 |
| CCDC138 | 0.37 | 3.55E-01 | 0.83  | 2.04E-01 | -1.25 | 8.94E-01 |
| CHCHD7  | 0.37 | 3.55E-01 | 0.47  | 3.20E-01 | 1.40  | 8.05E-02 |
| NXPE3   | 0.37 | 3.55E-01 | -0.14 | 5.56E-01 | 0.50  | 3.09E-01 |
| AATF    | 0.37 | 3.56E-01 | -0.86 | 8.05E-01 | 0.77  | 2.21E-01 |
| ATG9A   | 0.37 | 3.56E-01 | -0.03 | 5.10E-01 | -0.26 | 6.03E-01 |
| CDKL1   | 0.37 | 3.56E-01 | 0.52  | 3.01E-01 | -1.32 | 9.06E-01 |
| BRD4    | 0.37 | 3.56E-01 | -0.10 | 5.38E-01 | 0.72  | 2.37E-01 |
| VAV2    | 0.37 | 3.56E-01 | -0.16 | 5.63E-01 | 1.46  | 7.16E-02 |
| RDH13   | 0.37 | 3.56E-01 | -1.07 | 8.57E-01 | 1.10  | 1.35E-01 |
| SLC22A2 | 0.37 | 3.56E-01 | 1.00  | 1.60E-01 | 0.30  | 3.82E-01 |
| OR5AU1  | 0.37 | 3.56E-01 | 0.06  | 4.75E-01 | -0.20 | 5.78E-01 |
| RTTN    | 0.37 | 3.56E-01 | -1.14 | 8.73E-01 | 1.03  | 1.52E-01 |
| SDCBP2  | 0.37 | 3.56E-01 | 0.52  | 3.03E-01 | -0.91 | 8.17E-01 |
| KIF5A   | 0.37 | 3.56E-01 | 0.06  | 4.75E-01 | -0.85 | 8.02E-01 |
| TAS2R1  | 0.37 | 3.56E-01 | 0.65  | 2.57E-01 | -0.12 | 5.48E-01 |

|                |      |          |       |          |       |          |
|----------------|------|----------|-------|----------|-------|----------|
| ACSBG1         | 0.37 | 3.56E-01 | 0.35  | 3.64E-01 | -0.78 | 7.82E-01 |
| DDX28          | 0.37 | 3.56E-01 | -1.35 | 9.12E-01 | 1.06  | 1.43E-01 |
| MME            | 0.37 | 3.56E-01 | 0.05  | 4.79E-01 | 0.98  | 1.63E-01 |
| ATCAY          | 0.37 | 3.56E-01 | 0.80  | 2.12E-01 | -0.06 | 5.22E-01 |
| UQCR11         | 0.37 | 3.56E-01 | -1.08 | 8.59E-01 | 0.59  | 2.76E-01 |
| TNFSF9         | 0.37 | 3.56E-01 | 0.67  | 2.53E-01 | -1.86 | 9.69E-01 |
| MAP1LC3A       | 0.37 | 3.56E-01 | -0.15 | 5.59E-01 | -0.20 | 5.80E-01 |
| PPM1F          | 0.37 | 3.56E-01 | -0.05 | 5.19E-01 | 1.57  | 5.82E-02 |
| ETV4           | 0.37 | 3.56E-01 | -0.13 | 5.50E-01 | 0.34  | 3.68E-01 |
| CCND2          | 0.37 | 3.56E-01 | 0.72  | 2.36E-01 | 1.07  | 1.42E-01 |
| CDH9           | 0.37 | 3.56E-01 | 1.23  | 1.09E-01 | -0.73 | 7.67E-01 |
| ZNF300         | 0.37 | 3.56E-01 | 1.71  | 4.38E-02 | -0.56 | 7.13E-01 |
| CBLN2          | 0.37 | 3.56E-01 | -0.39 | 6.50E-01 | 1.08  | 1.39E-01 |
| SSC5D          | 0.37 | 3.57E-01 | -0.78 | 7.83E-01 | -0.23 | 5.91E-01 |
| GPATCH11       | 0.37 | 3.57E-01 | 0.09  | 4.65E-01 | -0.10 | 5.40E-01 |
| VRK3           | 0.37 | 3.57E-01 | -0.66 | 7.46E-01 | 1.66  | 4.84E-02 |
| ZNF786         | 0.37 | 3.57E-01 | 0.58  | 2.81E-01 | -0.08 | 5.33E-01 |
| TUSC2          | 0.37 | 3.57E-01 | 0.84  | 1.99E-01 | 0.04  | 4.83E-01 |
| MXI1           | 0.37 | 3.57E-01 | 0.61  | 2.71E-01 | -1.15 | 8.74E-01 |
| SEC14L1        | 0.37 | 3.57E-01 | 1.21  | 1.12E-01 | -1.25 | 8.94E-01 |
| ARSB           | 0.37 | 3.57E-01 | 0.82  | 2.07E-01 | 0.66  | 2.56E-01 |
| POLR2E         | 0.37 | 3.57E-01 | -0.46 | 6.76E-01 | -0.68 | 7.53E-01 |
| FAM186A        | 0.37 | 3.57E-01 | 0.64  | 2.60E-01 | -1.07 | 8.59E-01 |
| EMILIN1        | 0.37 | 3.57E-01 | 1.46  | 7.23E-02 | 0.23  | 4.09E-01 |
| HERC3          | 0.37 | 3.57E-01 | 0.39  | 3.49E-01 | -0.72 | 7.64E-01 |
| KRTAP6-1       | 0.37 | 3.57E-01 | -1.00 | 8.41E-01 | 0.60  | 2.76E-01 |
| MSANTD3-TMEFF1 | 0.37 | 3.57E-01 | 0.43  | 3.34E-01 | -1.03 | 8.48E-01 |
| TMEFF1         | 0.37 | 3.57E-01 | 0.43  | 3.34E-01 | -1.03 | 8.48E-01 |
| ZNF274         | 0.37 | 3.57E-01 | 0.43  | 3.34E-01 | -1.12 | 8.68E-01 |
| STAU1          | 0.37 | 3.57E-01 | 0.20  | 4.20E-01 | -0.84 | 8.00E-01 |
| ALG1L          | 0.37 | 3.57E-01 | 0.73  | 2.32E-01 | -0.65 | 7.41E-01 |



|          |      |          |       |          |       |          |
|----------|------|----------|-------|----------|-------|----------|
| LCK      | 0.36 | 3.58E-01 | 0.01  | 4.94E-01 | 0.12  | 4.50E-01 |
| SH3D21   | 0.36 | 3.58E-01 | -0.25 | 5.97E-01 | 0.04  | 4.86E-01 |
| SNRNP48  | 0.36 | 3.58E-01 | -0.33 | 6.28E-01 | 1.61  | 5.42E-02 |
| MTRF1L   | 0.36 | 3.58E-01 | 1.46  | 7.28E-02 | 0.64  | 2.62E-01 |
| ETV7     | 0.36 | 3.58E-01 | -0.16 | 5.63E-01 | -0.02 | 5.08E-01 |
| SYS1     | 0.36 | 3.58E-01 | -0.15 | 5.60E-01 | 0.05  | 4.81E-01 |
| FBF1     | 0.36 | 3.58E-01 | -0.19 | 5.77E-01 | 1.97  | 2.43E-02 |
| CALCOCO1 | 0.36 | 3.58E-01 | -0.66 | 7.45E-01 | 0.76  | 2.24E-01 |
| PSMA7    | 0.36 | 3.58E-01 | -0.81 | 7.92E-01 | 0.80  | 2.11E-01 |
| SBF2     | 0.36 | 3.59E-01 | 1.24  | 1.08E-01 | -1.30 | 9.04E-01 |
| OAZ1     | 0.36 | 3.59E-01 | -0.11 | 5.45E-01 | -0.67 | 7.48E-01 |
| BANP     | 0.36 | 3.59E-01 | 0.16  | 4.37E-01 | 1.54  | 6.21E-02 |
| CHRM2    | 0.36 | 3.59E-01 | -0.09 | 5.34E-01 | -0.22 | 5.86E-01 |
| CEP78    | 0.36 | 3.59E-01 | -0.70 | 7.58E-01 | 0.38  | 3.52E-01 |
| FAM43A   | 0.36 | 3.59E-01 | -0.80 | 7.87E-01 | 0.02  | 4.93E-01 |
| DDI1     | 0.36 | 3.59E-01 | -1.16 | 8.76E-01 | 0.66  | 2.55E-01 |
| OR5AC2   | 0.36 | 3.59E-01 | -2.16 | 9.85E-01 | 0.96  | 1.69E-01 |
| HOMER3   | 0.36 | 3.59E-01 | 0.31  | 3.79E-01 | 0.57  | 2.84E-01 |
| ELL3     | 0.36 | 3.59E-01 | 1.34  | 9.02E-02 | -1.84 | 9.67E-01 |
| AIDA     | 0.36 | 3.59E-01 | -0.09 | 5.34E-01 | -0.83 | 7.98E-01 |
| KBTBD7   | 0.36 | 3.59E-01 | 1.12  | 1.31E-01 | 0.91  | 1.83E-01 |
| MFF      | 0.36 | 3.59E-01 | 0.34  | 3.68E-01 | 1.46  | 7.16E-02 |
| IQCK     | 0.36 | 3.59E-01 | -1.15 | 8.75E-01 | 0.83  | 2.03E-01 |
| ROBO3    | 0.36 | 3.59E-01 | -0.24 | 5.95E-01 | 0.30  | 3.82E-01 |
| RFXAP    | 0.36 | 3.59E-01 | 0.51  | 3.04E-01 | -1.52 | 9.35E-01 |
| IL5      | 0.36 | 3.59E-01 | -1.14 | 8.73E-01 | 1.51  | 6.51E-02 |
| TACO1    | 0.36 | 3.59E-01 | -0.11 | 5.44E-01 | 0.22  | 4.11E-01 |
| FBXO31   | 0.36 | 3.60E-01 | -0.30 | 6.18E-01 | 0.28  | 3.89E-01 |
| ISG20L2  | 0.36 | 3.60E-01 | 0.28  | 3.89E-01 | 0.17  | 4.32E-01 |
| NOS3     | 0.36 | 3.60E-01 | 0.22  | 4.12E-01 | 0.70  | 2.41E-01 |
| CTAGE5   | 0.36 | 3.60E-01 | -0.13 | 5.52E-01 | 1.45  | 7.33E-02 |

|          |      |          |       |          |       |          |
|----------|------|----------|-------|----------|-------|----------|
| RANBP10  | 0.36 | 3.60E-01 | -0.61 | 7.30E-01 | 1.53  | 6.26E-02 |
| DNAJC30  | 0.36 | 3.60E-01 | 0.43  | 3.33E-01 | -0.57 | 7.16E-01 |
| PLA2G4F  | 0.36 | 3.60E-01 | 0.16  | 4.38E-01 | -0.72 | 7.65E-01 |
| ACADM    | 0.36 | 3.60E-01 | 0.49  | 3.13E-01 | 0.38  | 3.50E-01 |
| NICN1    | 0.36 | 3.60E-01 | 0.02  | 4.93E-01 | 2.07  | 1.92E-02 |
| CA3      | 0.36 | 3.60E-01 | -0.03 | 5.12E-01 | -0.57 | 7.17E-01 |
| TPRA1    | 0.36 | 3.60E-01 | 0.30  | 3.81E-01 | -0.70 | 7.57E-01 |
| TRIM13   | 0.36 | 3.60E-01 | -1.18 | 8.80E-01 | 1.97  | 2.47E-02 |
| MIS18BP1 | 0.36 | 3.60E-01 | 0.61  | 2.70E-01 | 1.04  | 1.48E-01 |
| TRIM54   | 0.36 | 3.60E-01 | -0.44 | 6.70E-01 | 0.33  | 3.72E-01 |
| EPB41L3  | 0.36 | 3.60E-01 | 0.02  | 4.91E-01 | -0.64 | 7.40E-01 |
| PCLO     | 0.36 | 3.60E-01 | -0.83 | 7.97E-01 | 2.71  | 3.33E-03 |
| ZCCHC14  | 0.36 | 3.60E-01 | 0.36  | 3.60E-01 | -0.67 | 7.47E-01 |
| SEMG2    | 0.36 | 3.60E-01 | 0.21  | 4.15E-01 | -1.06 | 8.56E-01 |
| LRRC3C   | 0.36 | 3.60E-01 | -0.91 | 8.19E-01 | 0.95  | 1.72E-01 |
| SNRNP200 | 0.36 | 3.60E-01 | 0.45  | 3.26E-01 | -1.16 | 8.78E-01 |
| ATP5J2   | 0.36 | 3.60E-01 | -0.16 | 5.64E-01 | -0.01 | 5.04E-01 |
| CENPA    | 0.36 | 3.61E-01 | -0.37 | 6.43E-01 | 0.09  | 4.63E-01 |
| OR2K2    | 0.36 | 3.61E-01 | -2.24 | 9.87E-01 | 1.04  | 1.49E-01 |
| CEBPZ    | 0.36 | 3.61E-01 | 0.32  | 3.75E-01 | 0.47  | 3.18E-01 |
| C9orf16  | 0.36 | 3.61E-01 | -0.35 | 6.37E-01 | 0.07  | 4.71E-01 |
| PVRIG    | 0.35 | 3.61E-01 | -0.33 | 6.31E-01 | -0.36 | 6.39E-01 |
| GFI1     | 0.35 | 3.61E-01 | 0.33  | 3.70E-01 | -0.99 | 8.38E-01 |
| RHAG     | 0.35 | 3.61E-01 | 1.21  | 1.13E-01 | -0.11 | 5.44E-01 |
| CENPT    | 0.35 | 3.61E-01 | -0.11 | 5.44E-01 | 1.67  | 4.76E-02 |
| COCH     | 0.35 | 3.62E-01 | -0.92 | 8.20E-01 | 0.24  | 4.04E-01 |
| TEAD1    | 0.35 | 3.62E-01 | -0.93 | 8.23E-01 | 0.55  | 2.91E-01 |
| KLHL6    | 0.35 | 3.62E-01 | 0.81  | 2.10E-01 | -1.35 | 9.12E-01 |
| PCDHB16  | 0.35 | 3.62E-01 | -0.14 | 5.55E-01 | -0.70 | 7.58E-01 |
| OR1K1    | 0.35 | 3.62E-01 | 0.04  | 4.84E-01 | -0.57 | 7.17E-01 |
| MT1H     | 0.35 | 3.62E-01 | 0.68  | 2.49E-01 | -0.99 | 8.40E-01 |

|          |      |          |       |          |       |          |
|----------|------|----------|-------|----------|-------|----------|
| MARS     | 0.35 | 3.62E-01 | 0.21  | 4.17E-01 | -0.72 | 7.65E-01 |
| SSPN     | 0.35 | 3.62E-01 | -0.47 | 6.81E-01 | -0.13 | 5.52E-01 |
| ZNF730   | 0.35 | 3.62E-01 | 0.56  | 2.88E-01 | -0.27 | 6.05E-01 |
| GNAI1    | 0.35 | 3.62E-01 | -0.99 | 8.39E-01 | 0.67  | 2.52E-01 |
| ZBTB9    | 0.35 | 3.62E-01 | 0.66  | 2.54E-01 | -1.16 | 8.78E-01 |
| DOK7     | 0.35 | 3.62E-01 | 0.56  | 2.88E-01 | -0.05 | 5.20E-01 |
| ARHGEF18 | 0.35 | 3.63E-01 | -0.87 | 8.08E-01 | 0.74  | 2.31E-01 |
| CACNB2   | 0.35 | 3.63E-01 | -0.58 | 7.19E-01 | 0.05  | 4.80E-01 |
| PI4KB    | 0.35 | 3.63E-01 | 0.14  | 4.45E-01 | -0.44 | 6.71E-01 |
| SECTM1   | 0.35 | 3.63E-01 | -0.38 | 6.48E-01 | 0.36  | 3.58E-01 |
| MCEE     | 0.35 | 3.63E-01 | -0.09 | 5.35E-01 | 0.63  | 2.63E-01 |
| C1orf229 | 0.35 | 3.63E-01 | 1.40  | 8.08E-02 | -1.10 | 8.65E-01 |
| RNF123   | 0.35 | 3.63E-01 | -0.52 | 6.99E-01 | 1.45  | 7.38E-02 |
| MYO1D    | 0.35 | 3.63E-01 | 0.26  | 3.98E-01 | 0.41  | 3.40E-01 |
| TMEM150C | 0.35 | 3.63E-01 | 1.47  | 7.02E-02 | -0.03 | 5.12E-01 |
| PDE4A    | 0.35 | 3.63E-01 | -1.25 | 8.94E-01 | 0.69  | 2.46E-01 |
| SLC35G2  | 0.35 | 3.63E-01 | 0.90  | 1.83E-01 | -1.57 | 9.42E-01 |
| HECTD4   | 0.35 | 3.63E-01 | -0.79 | 7.87E-01 | 0.32  | 3.73E-01 |
| MLLT1    | 0.35 | 3.63E-01 | 0.13  | 4.49E-01 | -0.85 | 8.03E-01 |
| SRR      | 0.35 | 3.63E-01 | -0.36 | 6.41E-01 | 1.23  | 1.10E-01 |
| DDIT3    | 0.35 | 3.63E-01 | 0.68  | 2.48E-01 | -1.24 | 8.92E-01 |
| UEVLD    | 0.35 | 3.63E-01 | -1.93 | 9.73E-01 | 1.36  | 8.66E-02 |
| SRP9     | 0.35 | 3.64E-01 | -0.90 | 8.15E-01 | 0.14  | 4.45E-01 |
| ALPI     | 0.35 | 3.64E-01 | 0.82  | 2.06E-01 | 0.06  | 4.76E-01 |
| VN1R1    | 0.35 | 3.64E-01 | -0.55 | 7.07E-01 | 0.71  | 2.38E-01 |
| SSSCA1   | 0.35 | 3.64E-01 | 0.39  | 3.47E-01 | -0.66 | 7.45E-01 |
| GNB1     | 0.35 | 3.64E-01 | 1.47  | 7.12E-02 | 0.90  | 1.83E-01 |
| FAM134B  | 0.35 | 3.64E-01 | 0.05  | 4.79E-01 | -1.21 | 8.86E-01 |
| C2orf74  | 0.35 | 3.64E-01 | -0.25 | 5.98E-01 | 0.37  | 3.57E-01 |
| BOLA3    | 0.35 | 3.64E-01 | -1.58 | 9.43E-01 | 0.87  | 1.93E-01 |
| DSG2     | 0.35 | 3.64E-01 | -1.07 | 8.57E-01 | 1.08  | 1.40E-01 |

|            |      |          |       |          |       |          |
|------------|------|----------|-------|----------|-------|----------|
| UCP1       | 0.35 | 3.64E-01 | 0.44  | 3.32E-01 | -0.70 | 7.57E-01 |
| FEM1A      | 0.35 | 3.64E-01 | -0.20 | 5.81E-01 | 0.16  | 4.37E-01 |
| AC114783.1 | 0.35 | 3.64E-01 | -1.21 | 8.87E-01 | 0.53  | 2.96E-01 |
| MEF2C      | 0.35 | 3.64E-01 | 2.96  | 1.55E-03 | -0.02 | 5.10E-01 |
| NNMT       | 0.35 | 3.64E-01 | -1.79 | 9.63E-01 | 1.30  | 9.72E-02 |
| HDGFRP3    | 0.35 | 3.64E-01 | 0.38  | 3.51E-01 | 2.24  | 1.27E-02 |
| RIMS3      | 0.35 | 3.64E-01 | 0.09  | 4.64E-01 | -0.33 | 6.31E-01 |
| SLX4       | 0.35 | 3.64E-01 | -0.14 | 5.57E-01 | -0.12 | 5.47E-01 |
| TIPIN      | 0.35 | 3.64E-01 | -0.33 | 6.30E-01 | 0.68  | 2.49E-01 |
| ATG4D      | 0.35 | 3.64E-01 | -0.94 | 8.26E-01 | 0.55  | 2.91E-01 |
| HHLA3      | 0.35 | 3.64E-01 | 0.48  | 3.17E-01 | -1.06 | 8.57E-01 |
| KRT6C      | 0.35 | 3.64E-01 | -0.71 | 7.61E-01 | 0.08  | 4.67E-01 |
| OR1C1      | 0.35 | 3.65E-01 | 0.98  | 1.65E-01 | -1.29 | 9.01E-01 |
| C18orf32   | 0.35 | 3.65E-01 | 0.16  | 4.35E-01 | 0.48  | 3.17E-01 |
| OR52K1     | 0.35 | 3.65E-01 | -1.19 | 8.82E-01 | 0.80  | 2.11E-01 |
| 43358      | 0.35 | 3.65E-01 | 0.28  | 3.91E-01 | 0.57  | 2.84E-01 |
| SH3BGR     | 0.34 | 3.65E-01 | 0.05  | 4.80E-01 | -0.15 | 5.61E-01 |
| PIK3CB     | 0.34 | 3.65E-01 | -0.73 | 7.69E-01 | 0.59  | 2.77E-01 |
| ZFYVE21    | 0.34 | 3.65E-01 | 0.23  | 4.07E-01 | -0.39 | 6.53E-01 |
| HEATR1     | 0.34 | 3.65E-01 | -0.66 | 7.45E-01 | 0.63  | 2.65E-01 |
| LZTFL1     | 0.34 | 3.65E-01 | -0.22 | 5.86E-01 | -0.35 | 6.35E-01 |
| C20orf202  | 0.34 | 3.65E-01 | 0.07  | 4.71E-01 | 0.34  | 3.67E-01 |
| PSMD12     | 0.34 | 3.65E-01 | 0.37  | 3.55E-01 | 0.20  | 4.21E-01 |
| QRICH2     | 0.34 | 3.65E-01 | 1.19  | 1.17E-01 | 0.15  | 4.41E-01 |
| PSMD13     | 0.34 | 3.66E-01 | 0.09  | 4.63E-01 | -0.76 | 7.76E-01 |
| GLS        | 0.34 | 3.66E-01 | 0.00  | 4.99E-01 | 0.07  | 4.72E-01 |
| KLF3       | 0.34 | 3.66E-01 | -0.02 | 5.08E-01 | -0.39 | 6.52E-01 |
| CRIP3      | 0.34 | 3.66E-01 | 0.30  | 3.83E-01 | 0.21  | 4.19E-01 |
| C17orf50   | 0.34 | 3.66E-01 | -1.10 | 8.64E-01 | 0.77  | 2.22E-01 |
| ZNF816     | 0.34 | 3.66E-01 | 0.76  | 2.22E-01 | -0.78 | 7.83E-01 |
| ZNF321P    | 0.34 | 3.66E-01 | 0.76  | 2.22E-01 | -0.78 | 7.83E-01 |

|            |      |          |       |          |       |          |
|------------|------|----------|-------|----------|-------|----------|
| ITGB3BP    | 0.34 | 3.66E-01 | 0.34  | 3.68E-01 | -1.39 | 9.18E-01 |
| PRSS53     | 0.34 | 3.66E-01 | 1.22  | 1.12E-01 | -0.78 | 7.84E-01 |
| SCTR       | 0.34 | 3.66E-01 | -0.77 | 7.80E-01 | 0.43  | 3.32E-01 |
| IL17RD     | 0.34 | 3.66E-01 | 0.13  | 4.49E-01 | -0.78 | 7.82E-01 |
| SLC12A4    | 0.34 | 3.66E-01 | -0.37 | 6.43E-01 | 1.65  | 4.96E-02 |
| VDAC1      | 0.34 | 3.67E-01 | 0.31  | 3.78E-01 | 0.36  | 3.58E-01 |
| TRPV1      | 0.34 | 3.67E-01 | 1.64  | 5.04E-02 | -0.38 | 6.47E-01 |
| GPATCH8    | 0.34 | 3.67E-01 | -0.33 | 6.28E-01 | -0.57 | 7.17E-01 |
| EMC7       | 0.34 | 3.67E-01 | 1.56  | 5.90E-02 | -0.54 | 7.04E-01 |
| LHFPL3     | 0.34 | 3.67E-01 | -0.74 | 7.72E-01 | 2.19  | 1.44E-02 |
| MED15      | 0.34 | 3.67E-01 | -0.76 | 7.78E-01 | 0.83  | 2.03E-01 |
| R3HCC1     | 0.34 | 3.67E-01 | -0.73 | 7.66E-01 | 1.50  | 6.74E-02 |
| ACSF2      | 0.34 | 3.67E-01 | 1.07  | 1.41E-01 | -0.74 | 7.69E-01 |
| TNFRSF1A   | 0.34 | 3.67E-01 | 0.86  | 1.96E-01 | -0.62 | 7.34E-01 |
| PITPNB     | 0.34 | 3.67E-01 | 0.70  | 2.42E-01 | 0.13  | 4.47E-01 |
| LPAR3      | 0.34 | 3.67E-01 | -0.63 | 7.35E-01 | 0.94  | 1.73E-01 |
| RNF103     | 0.34 | 3.67E-01 | -0.59 | 7.23E-01 | 0.12  | 4.53E-01 |
| FAM71E1    | 0.34 | 3.67E-01 | -0.05 | 5.19E-01 | 0.76  | 2.24E-01 |
| C5orf60    | 0.34 | 3.67E-01 | 0.76  | 2.23E-01 | 0.20  | 4.22E-01 |
| KRTAP10-2  | 0.34 | 3.67E-01 | -1.01 | 8.44E-01 | 0.57  | 2.84E-01 |
| FADS6      | 0.34 | 3.67E-01 | 0.21  | 4.16E-01 | -1.16 | 8.77E-01 |
| FAM208B    | 0.34 | 3.68E-01 | -0.24 | 5.94E-01 | 0.16  | 4.35E-01 |
| C20orf96   | 0.34 | 3.68E-01 | 0.61  | 2.70E-01 | -1.22 | 8.89E-01 |
| CYP2W1     | 0.34 | 3.68E-01 | -0.96 | 8.32E-01 | 1.73  | 4.18E-02 |
| PMF1-BGLAP | 0.34 | 3.68E-01 | -0.23 | 5.92E-01 | 1.84  | 3.31E-02 |
| PMF1       | 0.34 | 3.68E-01 | -0.23 | 5.92E-01 | 1.84  | 3.31E-02 |
| GPR137B    | 0.34 | 3.68E-01 | 0.41  | 3.39E-01 | -0.86 | 8.05E-01 |
| CENPV      | 0.34 | 3.68E-01 | -1.27 | 8.98E-01 | 0.68  | 2.49E-01 |
| XAF1       | 0.34 | 3.68E-01 | -0.63 | 7.36E-01 | 0.43  | 3.32E-01 |
| TEX264     | 0.34 | 3.68E-01 | -0.56 | 7.11E-01 | 0.17  | 4.34E-01 |
| DMTN       | 0.34 | 3.68E-01 | 0.33  | 3.69E-01 | 0.81  | 2.09E-01 |

|             |      |          |       |          |       |          |
|-------------|------|----------|-------|----------|-------|----------|
| NEK5        | 0.34 | 3.68E-01 | 0.24  | 4.05E-01 | 1.94  | 2.63E-02 |
| GHR         | 0.34 | 3.68E-01 | -1.20 | 8.86E-01 | 0.70  | 2.41E-01 |
| DHRS4L2     | 0.34 | 3.68E-01 | -0.30 | 6.17E-01 | 1.00  | 1.59E-01 |
| ADCY10      | 0.34 | 3.68E-01 | 0.10  | 4.58E-01 | 0.14  | 4.44E-01 |
| PASK        | 0.34 | 3.68E-01 | -0.28 | 6.10E-01 | -0.91 | 8.18E-01 |
| PNN         | 0.34 | 3.68E-01 | -0.29 | 6.15E-01 | 1.72  | 4.30E-02 |
| GJB2        | 0.34 | 3.68E-01 | 1.46  | 7.28E-02 | -1.02 | 8.47E-01 |
| CAAP1       | 0.34 | 3.68E-01 | 0.92  | 1.80E-01 | 0.17  | 4.33E-01 |
| CTC-241N9.1 | 0.34 | 3.69E-01 | -0.24 | 5.97E-01 | -0.12 | 5.49E-01 |
| ERP27       | 0.34 | 3.69E-01 | -0.39 | 6.51E-01 | 0.02  | 4.91E-01 |
| DNAJC5B     | 0.34 | 3.69E-01 | -0.27 | 6.08E-01 | 0.53  | 2.97E-01 |
| TGM7        | 0.34 | 3.69E-01 | 0.76  | 2.25E-01 | -0.37 | 6.45E-01 |
| IL36B       | 0.34 | 3.69E-01 | -0.48 | 6.84E-01 | 1.89  | 2.92E-02 |
| RBM4B       | 0.33 | 3.69E-01 | 0.83  | 2.04E-01 | -1.00 | 8.42E-01 |
| CACNG3      | 0.33 | 3.69E-01 | 0.65  | 2.58E-01 | 1.05  | 1.46E-01 |
| EXTL1       | 0.33 | 3.69E-01 | -0.54 | 7.07E-01 | -0.48 | 6.86E-01 |
| SLCO4C1     | 0.33 | 3.69E-01 | 0.42  | 3.37E-01 | 0.71  | 2.38E-01 |
| FAM53B      | 0.33 | 3.69E-01 | -0.16 | 5.65E-01 | -0.36 | 6.42E-01 |
| KLK6        | 0.33 | 3.69E-01 | -0.34 | 6.34E-01 | -0.75 | 7.73E-01 |
| STX19       | 0.33 | 3.69E-01 | -0.63 | 7.36E-01 | -0.09 | 5.36E-01 |
| AACS        | 0.33 | 3.69E-01 | 1.09  | 1.37E-01 | -1.03 | 8.48E-01 |
| ERH         | 0.33 | 3.69E-01 | -0.39 | 6.53E-01 | -0.13 | 5.53E-01 |
| RWDD4       | 0.33 | 3.70E-01 | -0.09 | 5.37E-01 | -0.76 | 7.76E-01 |
| TMEM171     | 0.33 | 3.70E-01 | 0.30  | 3.81E-01 | -0.30 | 6.18E-01 |
| NACC1       | 0.33 | 3.70E-01 | 2.00  | 2.29E-02 | 0.60  | 2.75E-01 |
| TOR1AIP2    | 0.33 | 3.70E-01 | -1.12 | 8.68E-01 | 0.71  | 2.40E-01 |
| KLHL30      | 0.33 | 3.70E-01 | 0.01  | 4.98E-01 | 0.54  | 2.95E-01 |
| TRAPPC4     | 0.33 | 3.70E-01 | -0.65 | 7.42E-01 | 0.77  | 2.20E-01 |
| ZMYND12     | 0.33 | 3.70E-01 | 0.87  | 1.92E-01 | 0.10  | 4.62E-01 |
| DNAJC21     | 0.33 | 3.70E-01 | 1.76  | 3.90E-02 | -1.83 | 9.67E-01 |
| RRH         | 0.33 | 3.70E-01 | -0.79 | 7.86E-01 | 0.60  | 2.73E-01 |

|             |      |          |       |          |       |          |
|-------------|------|----------|-------|----------|-------|----------|
| TMC6        | 0.33 | 3.70E-01 | 1.09  | 1.38E-01 | -0.24 | 5.93E-01 |
| KDM6B       | 0.33 | 3.70E-01 | 0.67  | 2.51E-01 | -0.53 | 7.01E-01 |
| CARD17      | 0.33 | 3.70E-01 | -1.66 | 9.52E-01 | 1.40  | 8.09E-02 |
| MYLK        | 0.33 | 3.70E-01 | 0.04  | 4.84E-01 | 0.60  | 2.75E-01 |
| ZNF681      | 0.33 | 3.70E-01 | 1.38  | 8.43E-02 | -0.98 | 8.38E-01 |
| GYP A       | 0.33 | 3.71E-01 | 0.08  | 4.68E-01 | -0.73 | 7.69E-01 |
| CNN1        | 0.33 | 3.71E-01 | -0.59 | 7.24E-01 | 0.03  | 4.88E-01 |
| UQCRQ       | 0.33 | 3.71E-01 | -0.37 | 6.46E-01 | 0.37  | 3.56E-01 |
| NCOA5       | 0.33 | 3.71E-01 | 0.60  | 2.76E-01 | -0.53 | 7.04E-01 |
| RARRES3     | 0.33 | 3.71E-01 | -0.81 | 7.90E-01 | 0.60  | 2.73E-01 |
| SIGLEC10    | 0.33 | 3.71E-01 | -0.69 | 7.54E-01 | 1.13  | 1.28E-01 |
| SFT2D1      | 0.33 | 3.71E-01 | 0.07  | 4.71E-01 | 1.23  | 1.09E-01 |
| EFCAB2      | 0.33 | 3.71E-01 | -1.03 | 8.48E-01 | 0.85  | 1.97E-01 |
| C7orf49     | 0.33 | 3.71E-01 | -0.98 | 8.36E-01 | 1.01  | 1.56E-01 |
| TTN         | 0.33 | 3.71E-01 | -1.00 | 8.42E-01 | 1.32  | 9.39E-02 |
| CDC42BPB    | 0.33 | 3.71E-01 | 0.89  | 1.86E-01 | -0.21 | 5.82E-01 |
| THRA        | 0.33 | 3.71E-01 | -0.67 | 7.47E-01 | 0.30  | 3.83E-01 |
| TMC5        | 0.33 | 3.71E-01 | 1.11  | 1.34E-01 | -1.46 | 9.28E-01 |
| AC074091.13 | 0.33 | 3.71E-01 | -0.81 | 7.92E-01 | 1.02  | 1.53E-01 |
| PTRF        | 0.33 | 3.71E-01 | -0.23 | 5.91E-01 | -0.11 | 5.46E-01 |
| GCNT3       | 0.33 | 3.71E-01 | 1.19  | 1.17E-01 | -0.57 | 7.16E-01 |
| RFK         | 0.33 | 3.72E-01 | 0.22  | 4.13E-01 | -0.81 | 7.92E-01 |
| OR7E24      | 0.33 | 3.72E-01 | 0.01  | 4.98E-01 | 0.14  | 4.45E-01 |
| SLX4IP      | 0.33 | 3.72E-01 | -0.50 | 6.92E-01 | -0.02 | 5.07E-01 |
| PEX7        | 0.33 | 3.72E-01 | 0.54  | 2.93E-01 | 0.36  | 3.58E-01 |
| OLFML2B     | 0.33 | 3.72E-01 | 1.43  | 7.58E-02 | -0.68 | 7.52E-01 |
| ALAS1       | 0.33 | 3.72E-01 | 0.86  | 1.94E-01 | -1.23 | 8.90E-01 |
| FAM117A     | 0.33 | 3.72E-01 | 0.03  | 4.86E-01 | -0.43 | 6.65E-01 |
| ST3GAL5     | 0.33 | 3.72E-01 | 1.79  | 3.67E-02 | -0.42 | 6.64E-01 |
| EIF2AK3     | 0.33 | 3.72E-01 | 1.00  | 1.58E-01 | -0.06 | 5.23E-01 |
| DMBX1       | 0.33 | 3.72E-01 | -0.54 | 7.07E-01 | 1.61  | 5.40E-02 |

|           |      |          |       |          |       |          |
|-----------|------|----------|-------|----------|-------|----------|
| FAM189B   | 0.33 | 3.72E-01 | -0.70 | 7.59E-01 | 0.55  | 2.92E-01 |
| C3orf38   | 0.33 | 3.72E-01 | 0.33  | 3.69E-01 | -0.99 | 8.40E-01 |
| LDLRAD1   | 0.33 | 3.72E-01 | 0.47  | 3.18E-01 | -0.43 | 6.67E-01 |
| MSL2      | 0.33 | 3.72E-01 | 1.30  | 9.60E-02 | -0.61 | 7.30E-01 |
| CD200R1L  | 0.33 | 3.72E-01 | 0.20  | 4.23E-01 | -0.84 | 8.01E-01 |
| NTM       | 0.33 | 3.72E-01 | 0.25  | 4.03E-01 | -0.10 | 5.39E-01 |
| HYAL3     | 0.33 | 3.72E-01 | 1.96  | 2.51E-02 | -0.95 | 8.30E-01 |
| SMIM15    | 0.33 | 3.72E-01 | -0.26 | 6.01E-01 | 1.74  | 4.12E-02 |
| TAS1R2    | 0.33 | 3.72E-01 | -0.27 | 6.05E-01 | -0.58 | 7.18E-01 |
| STRN3     | 0.33 | 3.72E-01 | -0.18 | 5.71E-01 | -0.53 | 7.03E-01 |
| RNF25     | 0.32 | 3.73E-01 | -0.77 | 7.79E-01 | 0.79  | 2.15E-01 |
| IDH3A     | 0.32 | 3.73E-01 | 1.33  | 9.13E-02 | -1.10 | 8.64E-01 |
| RPL7L1    | 0.32 | 3.73E-01 | -0.37 | 6.43E-01 | -0.02 | 5.07E-01 |
| FNDC9     | 0.32 | 3.73E-01 | -0.22 | 5.87E-01 | 0.06  | 4.77E-01 |
| EPB41L2   | 0.32 | 3.73E-01 | 0.11  | 4.55E-01 | -0.26 | 6.04E-01 |
| SLC30A2   | 0.32 | 3.73E-01 | -0.57 | 7.17E-01 | -0.21 | 5.83E-01 |
| LSMEM2    | 0.32 | 3.73E-01 | 1.59  | 5.56E-02 | 0.41  | 3.43E-01 |
| CD33      | 0.32 | 3.73E-01 | 0.69  | 2.44E-01 | -0.53 | 7.02E-01 |
| TBX5      | 0.32 | 3.73E-01 | -0.42 | 6.63E-01 | -0.39 | 6.51E-01 |
| NDUFS3    | 0.32 | 3.73E-01 | 1.77  | 3.82E-02 | -0.49 | 6.89E-01 |
| TNFRSF11B | 0.32 | 3.73E-01 | 1.51  | 6.59E-02 | 0.25  | 4.03E-01 |
| MEGF11    | 0.32 | 3.73E-01 | 1.22  | 1.12E-01 | -0.04 | 5.15E-01 |
| C16orf93  | 0.32 | 3.73E-01 | 0.07  | 4.71E-01 | 1.09  | 1.39E-01 |
| ING4      | 0.32 | 3.73E-01 | -0.95 | 8.28E-01 | 0.47  | 3.18E-01 |
| C19orf55  | 0.32 | 3.73E-01 | -0.11 | 5.45E-01 | 0.72  | 2.35E-01 |
| GFM1      | 0.32 | 3.74E-01 | 1.37  | 8.48E-02 | -1.00 | 8.42E-01 |
| MUT       | 0.32 | 3.74E-01 | -0.51 | 6.94E-01 | 0.48  | 3.17E-01 |
| ABHD10    | 0.32 | 3.74E-01 | 0.95  | 1.72E-01 | -0.31 | 6.22E-01 |
| DHX8      | 0.32 | 3.74E-01 | 0.55  | 2.92E-01 | -0.28 | 6.10E-01 |
| OR2Z1     | 0.32 | 3.74E-01 | -0.71 | 7.60E-01 | 0.58  | 2.80E-01 |
| CCDC60    | 0.32 | 3.74E-01 | -0.99 | 8.39E-01 | 1.31  | 9.43E-02 |



|            |      |          |       |          |       |          |
|------------|------|----------|-------|----------|-------|----------|
| ANGPTL6    | 0.32 | 3.74E-01 | 0.34  | 3.66E-01 | -0.43 | 6.67E-01 |
| MS4A13     | 0.32 | 3.74E-01 | -0.27 | 6.07E-01 | 0.37  | 3.57E-01 |
| TEDDM1     | 0.32 | 3.74E-01 | 0.15  | 4.42E-01 | -0.33 | 6.29E-01 |
| CCDC124    | 0.32 | 3.74E-01 | 0.17  | 4.33E-01 | 0.16  | 4.37E-01 |
| SPOP       | 0.32 | 3.74E-01 | 0.97  | 1.65E-01 | 0.78  | 2.19E-01 |
| PDAP1      | 0.32 | 3.74E-01 | 0.47  | 3.20E-01 | -1.15 | 8.74E-01 |
| AK1        | 0.32 | 3.74E-01 | -0.20 | 5.79E-01 | -0.67 | 7.50E-01 |
| MOCS2      | 0.32 | 3.74E-01 | -0.59 | 7.23E-01 | -0.11 | 5.44E-01 |
| CHSY1      | 0.32 | 3.74E-01 | 0.02  | 4.92E-01 | 0.38  | 3.51E-01 |
| KRT25      | 0.32 | 3.74E-01 | 0.60  | 2.75E-01 | 0.68  | 2.50E-01 |
| CDC25B     | 0.32 | 3.74E-01 | 1.21  | 1.14E-01 | -0.86 | 8.04E-01 |
| LGALS3     | 0.32 | 3.74E-01 | -0.08 | 5.31E-01 | 1.23  | 1.09E-01 |
| NT5E       | 0.32 | 3.74E-01 | 0.42  | 3.37E-01 | -0.10 | 5.42E-01 |
| MOXD1      | 0.32 | 3.75E-01 | 0.17  | 4.31E-01 | 1.56  | 5.92E-02 |
| ZBED4      | 0.32 | 3.75E-01 | 1.27  | 1.03E-01 | -1.79 | 9.64E-01 |
| LRRC10B    | 0.32 | 3.75E-01 | -0.89 | 8.13E-01 | 0.35  | 3.62E-01 |
| C16orf11   | 0.32 | 3.75E-01 | -0.19 | 5.77E-01 | -0.06 | 5.23E-01 |
| GNG11      | 0.32 | 3.75E-01 | -0.22 | 5.86E-01 | 2.33  | 9.81E-03 |
| RRN3       | 0.32 | 3.75E-01 | 0.70  | 2.41E-01 | 0.00  | 5.02E-01 |
| POLG       | 0.32 | 3.75E-01 | 2.09  | 1.84E-02 | 0.41  | 3.39E-01 |
| PGBD3      | 0.32 | 3.75E-01 | -0.66 | 7.45E-01 | 0.10  | 4.60E-01 |
| PTTG1IP    | 0.32 | 3.75E-01 | -0.18 | 5.73E-01 | -0.12 | 5.46E-01 |
| MRPL47     | 0.32 | 3.75E-01 | -0.03 | 5.11E-01 | 0.51  | 3.06E-01 |
| CCDC30     | 0.32 | 3.75E-01 | 0.39  | 3.49E-01 | 0.21  | 4.15E-01 |
| ANO4       | 0.32 | 3.75E-01 | 0.34  | 3.66E-01 | -0.07 | 5.30E-01 |
| EIF4A3     | 0.32 | 3.75E-01 | -0.74 | 7.69E-01 | 0.10  | 4.61E-01 |
| C3orf18    | 0.32 | 3.75E-01 | 0.93  | 1.75E-01 | -0.89 | 8.12E-01 |
| LDB1       | 0.32 | 3.75E-01 | -0.33 | 6.29E-01 | 2.06  | 1.96E-02 |
| FAM101A    | 0.32 | 3.75E-01 | 0.72  | 2.37E-01 | -0.44 | 6.70E-01 |
| RBM12B-AS1 | 0.32 | 3.75E-01 | 0.15  | 4.41E-01 | -0.65 | 7.43E-01 |
| ISM1       | 0.32 | 3.75E-01 | -1.38 | 9.17E-01 | 1.34  | 9.07E-02 |

|         |      |          |       |          |       |          |
|---------|------|----------|-------|----------|-------|----------|
| PRTG    | 0.32 | 3.75E-01 | 1.36  | 8.66E-02 | -0.32 | 6.27E-01 |
| XRCC2   | 0.32 | 3.75E-01 | -0.14 | 5.54E-01 | -0.40 | 6.57E-01 |
| THRAP3  | 0.32 | 3.76E-01 | -0.80 | 7.88E-01 | 0.45  | 3.25E-01 |
| SEMA4C  | 0.32 | 3.76E-01 | 1.70  | 4.41E-02 | 0.81  | 2.08E-01 |
| HMGCR   | 0.32 | 3.76E-01 | 1.10  | 1.35E-01 | 0.22  | 4.13E-01 |
| TFRC    | 0.32 | 3.76E-01 | -0.24 | 5.95E-01 | 0.05  | 4.81E-01 |
| RP1     | 0.32 | 3.76E-01 | 0.51  | 3.03E-01 | -0.90 | 8.15E-01 |
| RBM4    | 0.32 | 3.76E-01 | 0.14  | 4.46E-01 | -1.36 | 9.12E-01 |
| COX6A1  | 0.32 | 3.76E-01 | 0.07  | 4.73E-01 | -0.63 | 7.34E-01 |
| MPV17L  | 0.32 | 3.76E-01 | -1.25 | 8.95E-01 | 0.91  | 1.80E-01 |
| INPP4B  | 0.32 | 3.76E-01 | -0.69 | 7.53E-01 | 0.40  | 3.44E-01 |
| MAG     | 0.32 | 3.76E-01 | 0.24  | 4.05E-01 | -1.13 | 8.71E-01 |
| NDST1   | 0.32 | 3.76E-01 | 0.43  | 3.32E-01 | 1.72  | 4.26E-02 |
| UFSP2   | 0.32 | 3.76E-01 | -0.23 | 5.92E-01 | -0.53 | 7.01E-01 |
| BCHE    | 0.32 | 3.76E-01 | -1.19 | 8.83E-01 | 2.45  | 7.21E-03 |
| CYP2C19 | 0.32 | 3.76E-01 | 1.12  | 1.31E-01 | 0.28  | 3.90E-01 |
| SPG20   | 0.32 | 3.76E-01 | 0.91  | 1.81E-01 | -0.74 | 7.69E-01 |
| VDAC2   | 0.32 | 3.76E-01 | 0.47  | 3.20E-01 | 0.43  | 3.34E-01 |
| STXBP1  | 0.32 | 3.76E-01 | 0.25  | 4.00E-01 | -0.30 | 6.19E-01 |
| ZNF704  | 0.31 | 3.76E-01 | 0.30  | 3.83E-01 | -0.09 | 5.36E-01 |
| HDHD2   | 0.31 | 3.77E-01 | 0.02  | 4.93E-01 | -0.80 | 7.88E-01 |
| S100A7  | 0.31 | 3.77E-01 | -2.26 | 9.88E-01 | 1.00  | 1.59E-01 |
| ITLN1   | 0.31 | 3.77E-01 | 0.28  | 3.91E-01 | -0.43 | 6.65E-01 |
| IFT172  | 0.31 | 3.77E-01 | 0.72  | 2.35E-01 | 1.71  | 4.34E-02 |
| KLHL31  | 0.31 | 3.77E-01 | -0.09 | 5.35E-01 | 0.50  | 3.07E-01 |
| SH3YL1  | 0.31 | 3.77E-01 | -0.34 | 6.34E-01 | 0.37  | 3.54E-01 |
| TTYH2   | 0.31 | 3.77E-01 | -0.47 | 6.82E-01 | 0.85  | 1.99E-01 |
| ATP1A4  | 0.31 | 3.77E-01 | -0.25 | 5.98E-01 | -0.50 | 6.91E-01 |
| MRPL46  | 0.31 | 3.77E-01 | -0.62 | 7.32E-01 | 0.19  | 4.23E-01 |
| C5orf20 | 0.31 | 3.77E-01 | -0.20 | 5.80E-01 | -0.35 | 6.39E-01 |
| CKB     | 0.31 | 3.77E-01 | -0.67 | 7.47E-01 | 0.17  | 4.33E-01 |

|               |      |          |       |          |       |          |
|---------------|------|----------|-------|----------|-------|----------|
| ZNF724P       | 0.31 | 3.77E-01 | 0.73  | 2.32E-01 | -1.07 | 8.57E-01 |
| CARNS1        | 0.31 | 3.77E-01 | 2.22  | 1.33E-02 | 0.46  | 3.23E-01 |
| TINAGL1       | 0.31 | 3.77E-01 | 0.12  | 4.52E-01 | -0.66 | 7.45E-01 |
| HINFP         | 0.31 | 3.77E-01 | 0.59  | 2.78E-01 | -0.87 | 8.09E-01 |
| ELOF1         | 0.31 | 3.77E-01 | 0.08  | 4.68E-01 | -0.50 | 6.92E-01 |
| TRPV6         | 0.31 | 3.77E-01 | -0.20 | 5.80E-01 | 0.31  | 3.80E-01 |
| EFCAB12       | 0.31 | 3.77E-01 | -1.42 | 9.22E-01 | 1.50  | 6.71E-02 |
| FOXJ1         | 0.31 | 3.77E-01 | 1.15  | 1.25E-01 | -1.11 | 8.66E-01 |
| SETD1B        | 0.31 | 3.77E-01 | 0.92  | 1.79E-01 | -0.28 | 6.08E-01 |
| DGKA          | 0.31 | 3.78E-01 | 0.75  | 2.26E-01 | -1.44 | 9.26E-01 |
| RAB7L1        | 0.31 | 3.78E-01 | -0.96 | 8.31E-01 | -0.05 | 5.19E-01 |
| AKR1B1        | 0.31 | 3.78E-01 | 0.87  | 1.93E-01 | -0.85 | 8.02E-01 |
| SCARA5        | 0.31 | 3.78E-01 | 0.85  | 1.99E-01 | -1.58 | 9.43E-01 |
| ZFH3          | 0.31 | 3.78E-01 | -0.32 | 6.24E-01 | 2.40  | 8.26E-03 |
| C17orf59      | 0.31 | 3.78E-01 | -1.08 | 8.59E-01 | 1.10  | 1.35E-01 |
| CEACAM4       | 0.31 | 3.78E-01 | -0.41 | 6.61E-01 | 0.47  | 3.18E-01 |
| OGFR          | 0.31 | 3.78E-01 | 0.94  | 1.74E-01 | 0.38  | 3.53E-01 |
| LSM14B        | 0.31 | 3.78E-01 | -0.84 | 8.01E-01 | 0.66  | 2.55E-01 |
| RPL18         | 0.31 | 3.78E-01 | -1.02 | 8.46E-01 | 0.54  | 2.93E-01 |
| RHOB          | 0.31 | 3.78E-01 | -1.38 | 9.16E-01 | 1.27  | 1.02E-01 |
| CCDC84        | 0.31 | 3.78E-01 | -1.36 | 9.13E-01 | 0.97  | 1.67E-01 |
| KIF1B         | 0.31 | 3.78E-01 | 0.73  | 2.31E-01 | 0.54  | 2.95E-01 |
| CADPS2        | 0.31 | 3.78E-01 | -0.28 | 6.09E-01 | -0.52 | 6.99E-01 |
| RP11-343C2.11 | 0.31 | 3.78E-01 | -1.01 | 8.44E-01 | 1.81  | 3.54E-02 |
| KRT75         | 0.31 | 3.78E-01 | -1.24 | 8.93E-01 | 0.74  | 2.31E-01 |
| ZNF174        | 0.31 | 3.78E-01 | -0.65 | 7.41E-01 | -0.07 | 5.29E-01 |
| POTEE         | 0.31 | 3.79E-01 | -0.52 | 6.97E-01 | 0.15  | 4.41E-01 |
| ICT1          | 0.31 | 3.79E-01 | -0.60 | 7.24E-01 | 0.30  | 3.83E-01 |
| SCG3          | 0.31 | 3.79E-01 | 0.08  | 4.69E-01 | 0.11  | 4.57E-01 |
| ALDH6A1       | 0.31 | 3.79E-01 | -0.37 | 6.46E-01 | 0.75  | 2.27E-01 |
| SPDEF         | 0.31 | 3.79E-01 | 0.02  | 4.94E-01 | 0.59  | 2.79E-01 |

|                 |      |          |       |          |       |          |
|-----------------|------|----------|-------|----------|-------|----------|
| NCOA2           | 0.31 | 3.79E-01 | 1.15  | 1.26E-01 | -0.94 | 8.27E-01 |
| FAM163A         | 0.31 | 3.79E-01 | 0.34  | 3.66E-01 | -0.77 | 7.80E-01 |
| ELK4            | 0.31 | 3.79E-01 | 0.33  | 3.71E-01 | 1.44  | 7.51E-02 |
| CBLN4           | 0.31 | 3.79E-01 | -0.02 | 5.07E-01 | 0.40  | 3.44E-01 |
| REEP1           | 0.31 | 3.79E-01 | -1.66 | 9.51E-01 | 0.86  | 1.95E-01 |
| 43160           | 0.31 | 3.79E-01 | 0.91  | 1.82E-01 | -1.32 | 9.07E-01 |
| GRID2           | 0.31 | 3.79E-01 | 0.26  | 3.98E-01 | 0.69  | 2.45E-01 |
| SF3A2           | 0.31 | 3.79E-01 | 0.99  | 1.60E-01 | 0.29  | 3.88E-01 |
| MSGN1           | 0.31 | 3.79E-01 | 0.63  | 2.66E-01 | -1.88 | 9.70E-01 |
| OR51B5          | 0.31 | 3.79E-01 | -0.06 | 5.22E-01 | -0.48 | 6.85E-01 |
| FAM19A2         | 0.31 | 3.79E-01 | -0.27 | 6.05E-01 | -0.36 | 6.39E-01 |
| AXIN1           | 0.31 | 3.79E-01 | -1.17 | 8.80E-01 | 0.92  | 1.80E-01 |
| GALT            | 0.31 | 3.79E-01 | 0.10  | 4.62E-01 | 1.09  | 1.37E-01 |
| RPTN            | 0.31 | 3.80E-01 | 0.59  | 2.76E-01 | -1.94 | 9.74E-01 |
| TAPT1           | 0.31 | 3.80E-01 | -0.17 | 5.67E-01 | 0.79  | 2.16E-01 |
| MECOM           | 0.31 | 3.80E-01 | 0.86  | 1.96E-01 | -1.89 | 9.71E-01 |
| POU6F1          | 0.31 | 3.80E-01 | -0.39 | 6.52E-01 | 0.82  | 2.06E-01 |
| GPATCH1         | 0.31 | 3.80E-01 | 0.76  | 2.25E-01 | -1.34 | 9.09E-01 |
| HDGFL1          | 0.31 | 3.80E-01 | 1.15  | 1.25E-01 | 0.26  | 3.97E-01 |
| ZNF716          | 0.31 | 3.80E-01 | -0.15 | 5.60E-01 | -0.05 | 5.21E-01 |
| TSRM            | 0.31 | 3.80E-01 | 0.23  | 4.10E-01 | -0.68 | 7.53E-01 |
| PIGU            | 0.31 | 3.80E-01 | 0.01  | 4.98E-01 | -0.43 | 6.66E-01 |
| FREM1           | 0.31 | 3.80E-01 | 0.52  | 3.01E-01 | 0.19  | 4.25E-01 |
| MZT2A           | 0.31 | 3.80E-01 | -0.71 | 7.62E-01 | 0.86  | 1.94E-01 |
| LCN2            | 0.30 | 3.80E-01 | 0.35  | 3.64E-01 | -0.80 | 7.87E-01 |
| LGALS14         | 0.30 | 3.80E-01 | -0.76 | 7.77E-01 | 0.74  | 2.30E-01 |
| MGAT4B          | 0.30 | 3.80E-01 | 0.05  | 4.79E-01 | -0.49 | 6.87E-01 |
| CCDC129         | 0.30 | 3.80E-01 | -0.09 | 5.38E-01 | 0.76  | 2.25E-01 |
| GPC1            | 0.30 | 3.80E-01 | 0.54  | 2.94E-01 | -0.24 | 5.93E-01 |
| SH2D3A          | 0.30 | 3.80E-01 | 1.67  | 4.75E-02 | 0.23  | 4.08E-01 |
| RNASEK-C17orf49 | 0.30 | 3.81E-01 | -0.31 | 6.23E-01 | 0.19  | 4.24E-01 |

|          |      |          |       |          |       |          |
|----------|------|----------|-------|----------|-------|----------|
| C17orf49 | 0.30 | 3.81E-01 | -0.31 | 6.23E-01 | 0.19  | 4.24E-01 |
| MYBL1    | 0.30 | 3.81E-01 | 0.45  | 3.28E-01 | -0.56 | 7.11E-01 |
| MIOX     | 0.30 | 3.81E-01 | 0.07  | 4.70E-01 | -1.12 | 8.69E-01 |
| MX2      | 0.30 | 3.81E-01 | 1.23  | 1.09E-01 | 0.59  | 2.79E-01 |
| HBEGF    | 0.30 | 3.81E-01 | 0.33  | 3.72E-01 | -0.87 | 8.07E-01 |
| RWDD2B   | 0.30 | 3.81E-01 | 0.55  | 2.91E-01 | -1.17 | 8.79E-01 |
| TCTN2    | 0.30 | 3.81E-01 | -0.23 | 5.90E-01 | 1.68  | 4.66E-02 |
| ELF2     | 0.30 | 3.81E-01 | 0.11  | 4.58E-01 | -0.07 | 5.27E-01 |
| MOB2     | 0.30 | 3.81E-01 | 2.31  | 1.04E-02 | 0.60  | 2.73E-01 |
| TRHR     | 0.30 | 3.81E-01 | 0.17  | 4.33E-01 | 0.16  | 4.35E-01 |
| CCNA2    | 0.30 | 3.81E-01 | -0.22 | 5.87E-01 | 1.22  | 1.11E-01 |
| STAT5A   | 0.30 | 3.81E-01 | 0.26  | 3.97E-01 | 0.43  | 3.33E-01 |
| S100A7A  | 0.30 | 3.81E-01 | -0.76 | 7.76E-01 | 1.28  | 1.01E-01 |
| TXNIP    | 0.30 | 3.81E-01 | 0.69  | 2.46E-01 | -0.96 | 8.33E-01 |
| LRRC4B   | 0.30 | 3.81E-01 | 0.79  | 2.14E-01 | -1.99 | 9.77E-01 |
| GBP4     | 0.30 | 3.81E-01 | 0.47  | 3.21E-01 | -0.18 | 5.70E-01 |
| BMS1     | 0.30 | 3.81E-01 | -0.57 | 7.15E-01 | 1.26  | 1.05E-01 |
| NEUROD6  | 0.30 | 3.82E-01 | -0.79 | 7.87E-01 | 0.32  | 3.74E-01 |
| TTC16    | 0.30 | 3.82E-01 | 0.88  | 1.88E-01 | -0.67 | 7.48E-01 |
| RHOF     | 0.30 | 3.82E-01 | 0.59  | 2.78E-01 | 0.13  | 4.47E-01 |
| CCDC25   | 0.30 | 3.82E-01 | 0.60  | 2.74E-01 | -1.50 | 9.34E-01 |
| RCOR3    | 0.30 | 3.82E-01 | 0.97  | 1.65E-01 | -0.86 | 8.04E-01 |
| HLTF     | 0.30 | 3.82E-01 | -1.15 | 8.76E-01 | 0.66  | 2.55E-01 |
| FAM19A1  | 0.30 | 3.82E-01 | 1.30  | 9.74E-02 | -0.13 | 5.52E-01 |
| DIO2     | 0.30 | 3.82E-01 | -0.78 | 7.83E-01 | 0.95  | 1.72E-01 |
| VPS35    | 0.30 | 3.82E-01 | -0.19 | 5.75E-01 | 0.47  | 3.20E-01 |
| TXK      | 0.30 | 3.82E-01 | -0.30 | 6.17E-01 | 0.74  | 2.29E-01 |
| VSTM2L   | 0.30 | 3.82E-01 | -1.32 | 9.06E-01 | 0.02  | 4.93E-01 |
| FBXO47   | 0.30 | 3.82E-01 | -0.38 | 6.46E-01 | 0.92  | 1.79E-01 |
| CAPN7    | 0.30 | 3.82E-01 | -0.52 | 6.98E-01 | 0.84  | 2.01E-01 |
| FAM92A1  | 0.30 | 3.82E-01 | -0.27 | 6.05E-01 | -0.46 | 6.78E-01 |

|          |      |          |       |          |       |          |
|----------|------|----------|-------|----------|-------|----------|
| NPCDR1   | 0.30 | 3.82E-01 | -0.93 | 8.23E-01 | 0.77  | 2.21E-01 |
| MAT1A    | 0.30 | 3.82E-01 | 0.60  | 2.73E-01 | -0.26 | 6.03E-01 |
| C2orf80  | 0.30 | 3.82E-01 | 0.71  | 2.38E-01 | -1.09 | 8.62E-01 |
| PAK1IP1  | 0.30 | 3.82E-01 | 0.34  | 3.67E-01 | 0.65  | 2.58E-01 |
| TTC6     | 0.30 | 3.83E-01 | 0.01  | 4.98E-01 | 0.61  | 2.70E-01 |
| SLC35G5  | 0.30 | 3.83E-01 | 1.78  | 3.79E-02 | -0.29 | 6.15E-01 |
| MAPK7    | 0.30 | 3.83E-01 | 0.95  | 1.72E-01 | -1.25 | 8.94E-01 |
| DEAF1    | 0.30 | 3.83E-01 | -0.60 | 7.25E-01 | 1.58  | 5.71E-02 |
| PLCB4    | 0.30 | 3.83E-01 | 1.13  | 1.29E-01 | 0.22  | 4.15E-01 |
| PTGES3   | 0.30 | 3.83E-01 | 0.58  | 2.80E-01 | -0.81 | 7.90E-01 |
| AP5B1    | 0.30 | 3.83E-01 | 1.08  | 1.41E-01 | -1.55 | 9.39E-01 |
| ANKRD18B | 0.30 | 3.83E-01 | 0.21  | 4.15E-01 | -0.31 | 6.23E-01 |
| SMYD4    | 0.30 | 3.83E-01 | 0.57  | 2.83E-01 | -0.89 | 8.13E-01 |
| FERMT2   | 0.30 | 3.83E-01 | 0.53  | 2.99E-01 | -0.57 | 7.14E-01 |
| KIF2C    | 0.30 | 3.83E-01 | 1.61  | 5.41E-02 | -0.23 | 5.92E-01 |
| C1orf228 | 0.30 | 3.83E-01 | 1.57  | 5.83E-02 | -2.22 | 9.87E-01 |
| ELMOD2   | 0.30 | 3.83E-01 | 0.64  | 2.62E-01 | -0.67 | 7.47E-01 |
| SPG21    | 0.30 | 3.84E-01 | 0.46  | 3.24E-01 | -0.15 | 5.58E-01 |
| AASDHPPT | 0.30 | 3.84E-01 | 0.54  | 2.94E-01 | -1.04 | 8.52E-01 |
| TBC1D10C | 0.30 | 3.84E-01 | 2.23  | 1.29E-02 | 1.11  | 1.34E-01 |
| BCLAF1   | 0.30 | 3.84E-01 | 1.24  | 1.07E-01 | -0.38 | 6.50E-01 |
| FAM115C  | 0.30 | 3.84E-01 | -0.35 | 6.36E-01 | 1.38  | 8.44E-02 |
| ZNF610   | 0.30 | 3.84E-01 | 1.70  | 4.47E-02 | 1.19  | 1.17E-01 |
| USP42    | 0.29 | 3.84E-01 | -1.11 | 8.67E-01 | 0.76  | 2.24E-01 |
| PDE3A    | 0.29 | 3.84E-01 | -0.18 | 5.71E-01 | -0.47 | 6.79E-01 |
| PTPRM    | 0.29 | 3.84E-01 | 1.32  | 9.28E-02 | -1.33 | 9.08E-01 |
| ZNF223   | 0.29 | 3.84E-01 | 0.94  | 1.75E-01 | -1.61 | 9.47E-01 |
| DTD1     | 0.29 | 3.84E-01 | 0.48  | 3.16E-01 | 0.04  | 4.85E-01 |
| B3GNT3   | 0.29 | 3.84E-01 | -0.07 | 5.28E-01 | -0.03 | 5.11E-01 |
| CCL27    | 0.29 | 3.84E-01 | 0.94  | 1.74E-01 | 0.31  | 3.77E-01 |
| MARK2    | 0.29 | 3.84E-01 | -0.09 | 5.34E-01 | 0.13  | 4.49E-01 |

|          |      |          |       |          |       |          |
|----------|------|----------|-------|----------|-------|----------|
| PPP1R13B | 0.29 | 3.84E-01 | 0.23  | 4.09E-01 | -0.51 | 6.96E-01 |
| ATP9A    | 0.29 | 3.84E-01 | 0.83  | 2.04E-01 | 0.03  | 4.88E-01 |
| TNFRSF9  | 0.29 | 3.84E-01 | 0.42  | 3.37E-01 | -0.83 | 7.98E-01 |
| DCAF4L1  | 0.29 | 3.85E-01 | -2.37 | 9.91E-01 | 1.66  | 4.89E-02 |
| RXRG     | 0.29 | 3.85E-01 | -0.11 | 5.44E-01 | 0.89  | 1.86E-01 |
| MRGBP    | 0.29 | 3.85E-01 | -0.09 | 5.34E-01 | 0.65  | 2.58E-01 |
| NBPF6    | 0.29 | 3.85E-01 | -0.41 | 6.58E-01 | 0.10  | 4.60E-01 |
| YBX3     | 0.29 | 3.85E-01 | -0.78 | 7.83E-01 | 1.13  | 1.30E-01 |
| UMOD     | 0.29 | 3.85E-01 | 0.19  | 4.25E-01 | -1.12 | 8.69E-01 |
| NINL     | 0.29 | 3.85E-01 | 0.09  | 4.65E-01 | 0.60  | 2.75E-01 |
| OR1N1    | 0.29 | 3.85E-01 | 0.86  | 1.96E-01 | -0.45 | 6.72E-01 |
| GOLGA8M  | 0.29 | 3.85E-01 | -0.99 | 8.38E-01 | 0.92  | 1.79E-01 |
| KLK3     | 0.29 | 3.85E-01 | -0.87 | 8.07E-01 | 0.64  | 2.62E-01 |
| RHOBTB1  | 0.29 | 3.85E-01 | -0.15 | 5.60E-01 | -0.86 | 8.06E-01 |
| PSMD8    | 0.29 | 3.85E-01 | 0.45  | 3.28E-01 | -1.27 | 8.98E-01 |
| SFPQ     | 0.29 | 3.85E-01 | -0.41 | 6.60E-01 | 0.03  | 4.88E-01 |
| CCDC179  | 0.29 | 3.85E-01 | 0.80  | 2.11E-01 | -0.93 | 8.24E-01 |
| LCN1     | 0.29 | 3.85E-01 | 0.46  | 3.22E-01 | 0.06  | 4.76E-01 |
| PTPRF    | 0.29 | 3.85E-01 | -0.22 | 5.87E-01 | -0.22 | 5.88E-01 |
| FBXO3    | 0.29 | 3.85E-01 | -0.99 | 8.40E-01 | 2.12  | 1.71E-02 |
| ARPC1B   | 0.29 | 3.86E-01 | 0.53  | 2.98E-01 | -0.99 | 8.40E-01 |
| FCRL2    | 0.29 | 3.86E-01 | -0.05 | 5.20E-01 | 0.79  | 2.14E-01 |
| PPP2R3C  | 0.29 | 3.86E-01 | -0.36 | 6.42E-01 | 0.17  | 4.34E-01 |
| CPD      | 0.29 | 3.86E-01 | 0.17  | 4.32E-01 | -0.30 | 6.19E-01 |
| NRIP2    | 0.29 | 3.86E-01 | 0.30  | 3.83E-01 | 0.40  | 3.46E-01 |
| SULF1    | 0.29 | 3.86E-01 | -0.05 | 5.21E-01 | -0.15 | 5.61E-01 |
| C12orf29 | 0.29 | 3.86E-01 | 0.81  | 2.08E-01 | -0.54 | 7.05E-01 |
| EFCAB1   | 0.29 | 3.86E-01 | -0.33 | 6.31E-01 | 0.48  | 3.16E-01 |
| SENP2    | 0.29 | 3.86E-01 | -0.41 | 6.61E-01 | 0.06  | 4.77E-01 |
| NTPCR    | 0.29 | 3.86E-01 | 0.62  | 2.67E-01 | -0.15 | 5.61E-01 |
| OR1B1    | 0.29 | 3.86E-01 | -0.72 | 7.66E-01 | 1.02  | 1.54E-01 |

|          |      |          |       |          |       |          |
|----------|------|----------|-------|----------|-------|----------|
| SMARCA4  | 0.29 | 3.86E-01 | 1.00  | 1.59E-01 | -1.36 | 9.13E-01 |
| STX12    | 0.29 | 3.86E-01 | -0.86 | 8.06E-01 | 0.34  | 3.68E-01 |
| EIF1B    | 0.29 | 3.86E-01 | 1.12  | 1.32E-01 | -0.40 | 6.54E-01 |
| PPP1R7   | 0.29 | 3.86E-01 | -0.25 | 5.97E-01 | -0.58 | 7.18E-01 |
| C12orf54 | 0.29 | 3.87E-01 | -0.38 | 6.50E-01 | 0.29  | 3.86E-01 |
| KCNJ4    | 0.29 | 3.87E-01 | -0.08 | 5.32E-01 | 0.43  | 3.33E-01 |
| C1orf189 | 0.29 | 3.87E-01 | 0.22  | 4.13E-01 | -0.16 | 5.65E-01 |
| TCEA2    | 0.29 | 3.87E-01 | 0.42  | 3.36E-01 | -0.15 | 5.58E-01 |
| OR11A1   | 0.29 | 3.87E-01 | -0.12 | 5.48E-01 | 0.49  | 3.14E-01 |
| WDR55    | 0.29 | 3.87E-01 | -0.61 | 7.30E-01 | -0.02 | 5.10E-01 |
| KRT79    | 0.29 | 3.87E-01 | 0.54  | 2.95E-01 | -1.35 | 9.12E-01 |
| PTGFRN   | 0.29 | 3.87E-01 | 0.39  | 3.50E-01 | 0.48  | 3.14E-01 |
| LAMTOR4  | 0.29 | 3.87E-01 | 0.08  | 4.70E-01 | 1.63  | 5.14E-02 |
| GUK1     | 0.29 | 3.87E-01 | 0.54  | 2.95E-01 | -1.07 | 8.57E-01 |
| MXRA8    | 0.29 | 3.87E-01 | 0.57  | 2.83E-01 | -0.83 | 7.98E-01 |
| NDUFAF7  | 0.29 | 3.87E-01 | -0.03 | 5.13E-01 | 0.38  | 3.53E-01 |
| CAPZA1   | 0.29 | 3.87E-01 | 0.80  | 2.12E-01 | -1.24 | 8.93E-01 |
| TPRXL    | 0.29 | 3.87E-01 | -0.67 | 7.50E-01 | 0.35  | 3.62E-01 |
| SNX14    | 0.29 | 3.87E-01 | 0.01  | 4.96E-01 | 0.47  | 3.19E-01 |
| SRRM4    | 0.29 | 3.87E-01 | -0.12 | 5.49E-01 | -0.14 | 5.56E-01 |
| BRSK1    | 0.29 | 3.87E-01 | 0.88  | 1.90E-01 | -0.41 | 6.58E-01 |
| NCAPD3   | 0.29 | 3.87E-01 | -0.01 | 5.03E-01 | 0.44  | 3.30E-01 |
| NPC1L1   | 0.29 | 3.87E-01 | 0.22  | 4.14E-01 | 2.74  | 3.03E-03 |
| PMAIP1   | 0.29 | 3.87E-01 | 0.57  | 2.85E-01 | 1.02  | 1.53E-01 |
| YTHDF2   | 0.29 | 3.87E-01 | 0.59  | 2.77E-01 | -0.78 | 7.83E-01 |
| ERI1     | 0.29 | 3.87E-01 | -0.61 | 7.29E-01 | 0.35  | 3.61E-01 |
| C19orf77 | 0.29 | 3.87E-01 | 1.58  | 5.71E-02 | 1.67  | 4.73E-02 |
| LEO1     | 0.29 | 3.87E-01 | -1.36 | 9.14E-01 | 1.48  | 7.00E-02 |
| PDE6A    | 0.29 | 3.88E-01 | 0.41  | 3.40E-01 | -1.39 | 9.18E-01 |
| P2RY2    | 0.29 | 3.88E-01 | -1.10 | 8.65E-01 | 0.30  | 3.84E-01 |
| NCOR2    | 0.29 | 3.88E-01 | 1.63  | 5.17E-02 | 0.60  | 2.75E-01 |



|          |      |          |       |          |       |          |
|----------|------|----------|-------|----------|-------|----------|
| LRRC48   | 0.29 | 3.88E-01 | 1.21  | 1.13E-01 | -0.45 | 6.75E-01 |
| UTP6     | 0.28 | 3.88E-01 | 0.25  | 4.01E-01 | -0.04 | 5.18E-01 |
| ATP13A1  | 0.28 | 3.88E-01 | 1.65  | 4.95E-02 | -0.92 | 8.20E-01 |
| SUPT7L   | 0.28 | 3.88E-01 | -0.92 | 8.20E-01 | 0.86  | 1.96E-01 |
| PDE2A    | 0.28 | 3.88E-01 | -1.16 | 8.77E-01 | 1.44  | 7.45E-02 |
| WBP2NL   | 0.28 | 3.89E-01 | 0.88  | 1.90E-01 | -1.53 | 9.37E-01 |
| CATSPERG | 0.28 | 3.89E-01 | 0.97  | 1.66E-01 | -0.26 | 6.01E-01 |
| FMOD     | 0.28 | 3.89E-01 | 0.12  | 4.51E-01 | -1.32 | 9.07E-01 |
| AK2      | 0.28 | 3.89E-01 | 0.78  | 2.19E-01 | 0.08  | 4.68E-01 |
| JAG1     | 0.28 | 3.89E-01 | -0.45 | 6.74E-01 | 0.05  | 4.79E-01 |
| VWDE     | 0.28 | 3.89E-01 | -0.73 | 7.68E-01 | 0.81  | 2.09E-01 |
| MYEOV    | 0.28 | 3.89E-01 | 0.62  | 2.67E-01 | -0.95 | 8.29E-01 |
| FAM209B  | 0.28 | 3.89E-01 | -0.15 | 5.61E-01 | -0.18 | 5.72E-01 |
| MIPOL1   | 0.28 | 3.89E-01 | 0.13  | 4.47E-01 | -0.64 | 7.39E-01 |
| TMEM243  | 0.28 | 3.89E-01 | 0.20  | 4.20E-01 | -0.63 | 7.36E-01 |
| TP53INP1 | 0.28 | 3.89E-01 | -1.74 | 9.59E-01 | 0.39  | 3.48E-01 |
| NLN      | 0.28 | 3.89E-01 | 0.99  | 1.60E-01 | 1.61  | 5.35E-02 |
| NPTX2    | 0.28 | 3.89E-01 | 0.56  | 2.86E-01 | 0.47  | 3.20E-01 |
| DDX41    | 0.28 | 3.89E-01 | -1.83 | 9.66E-01 | 1.05  | 1.47E-01 |
| SLC26A4  | 0.28 | 3.90E-01 | 0.05  | 4.80E-01 | -0.60 | 7.26E-01 |
| P2RY13   | 0.28 | 3.90E-01 | 0.07  | 4.73E-01 | -0.19 | 5.76E-01 |
| PGC      | 0.28 | 3.90E-01 | -0.50 | 6.92E-01 | -0.51 | 6.95E-01 |
| ZWILCH   | 0.28 | 3.90E-01 | 0.15  | 4.42E-01 | 0.04  | 4.84E-01 |
| NGF      | 0.28 | 3.90E-01 | -0.08 | 5.32E-01 | -0.04 | 5.16E-01 |
| SRSF4    | 0.28 | 3.90E-01 | 0.09  | 4.65E-01 | -0.29 | 6.16E-01 |
| CNPY3    | 0.28 | 3.90E-01 | 1.33  | 9.18E-02 | -0.75 | 7.74E-01 |
| GLI2     | 0.28 | 3.90E-01 | -0.49 | 6.87E-01 | 0.13  | 4.50E-01 |
| VASN     | 0.28 | 3.90E-01 | 0.29  | 3.87E-01 | 0.67  | 2.51E-01 |
| ZNF141   | 0.28 | 3.90E-01 | 0.68  | 2.47E-01 | -2.18 | 9.85E-01 |
| KIAA0556 | 0.28 | 3.90E-01 | 0.78  | 2.18E-01 | -0.71 | 7.60E-01 |
| GTPBP2   | 0.28 | 3.90E-01 | -0.08 | 5.30E-01 | -0.19 | 5.74E-01 |

|           |      |          |       |          |       |          |
|-----------|------|----------|-------|----------|-------|----------|
| THSD4     | 0.28 | 3.90E-01 | 0.10  | 4.62E-01 | 0.77  | 2.19E-01 |
| HDAC10    | 0.28 | 3.90E-01 | -0.76 | 7.77E-01 | 0.26  | 3.99E-01 |
| PCMT1     | 0.28 | 3.90E-01 | -0.60 | 7.25E-01 | 0.34  | 3.66E-01 |
| DNAH6     | 0.28 | 3.90E-01 | -0.01 | 5.03E-01 | 0.69  | 2.45E-01 |
| IL33      | 0.28 | 3.90E-01 | -1.46 | 9.28E-01 | 1.13  | 1.28E-01 |
| ZNF585A   | 0.28 | 3.90E-01 | -0.17 | 5.69E-01 | 1.05  | 1.47E-01 |
| ATPAF2    | 0.28 | 3.90E-01 | 1.18  | 1.19E-01 | -0.40 | 6.54E-01 |
| ATG14     | 0.28 | 3.90E-01 | 0.34  | 3.65E-01 | 0.08  | 4.68E-01 |
| ZBED2     | 0.28 | 3.91E-01 | 0.44  | 3.29E-01 | 0.62  | 2.66E-01 |
| XAB2      | 0.28 | 3.91E-01 | 1.13  | 1.30E-01 | -0.57 | 7.17E-01 |
| UBFD1     | 0.28 | 3.91E-01 | 0.01  | 4.98E-01 | -0.17 | 5.66E-01 |
| DFNA5     | 0.28 | 3.91E-01 | 0.16  | 4.36E-01 | -0.83 | 7.96E-01 |
| DYNC111   | 0.28 | 3.91E-01 | -0.39 | 6.52E-01 | 1.16  | 1.22E-01 |
| LYG2      | 0.28 | 3.91E-01 | 0.49  | 3.13E-01 | 0.33  | 3.71E-01 |
| VPS54     | 0.28 | 3.91E-01 | -0.55 | 7.10E-01 | -0.70 | 7.58E-01 |
| MURC      | 0.28 | 3.91E-01 | 0.74  | 2.31E-01 | -0.39 | 6.50E-01 |
| C7orf71   | 0.28 | 3.91E-01 | 0.75  | 2.26E-01 | -1.00 | 8.41E-01 |
| EPC1      | 0.28 | 3.91E-01 | 0.59  | 2.77E-01 | 0.50  | 3.09E-01 |
| MUC3A     | 0.28 | 3.91E-01 | 0.53  | 3.00E-01 | 0.82  | 2.07E-01 |
| TM9SF1    | 0.28 | 3.91E-01 | -0.23 | 5.92E-01 | 0.08  | 4.68E-01 |
| TM9SF1    | 0.28 | 3.91E-01 | -0.23 | 5.92E-01 | 0.08  | 4.68E-01 |
| SYT8      | 0.28 | 3.91E-01 | 0.30  | 3.81E-01 | -0.83 | 7.98E-01 |
| NHLH1     | 0.28 | 3.91E-01 | -0.79 | 7.86E-01 | 0.19  | 4.26E-01 |
| CLTA      | 0.28 | 3.91E-01 | -0.50 | 6.93E-01 | -0.57 | 7.15E-01 |
| MBD6      | 0.28 | 3.91E-01 | 0.68  | 2.48E-01 | -1.70 | 9.55E-01 |
| RAB42     | 0.28 | 3.91E-01 | -0.02 | 5.06E-01 | 0.74  | 2.29E-01 |
| KIAA0895L | 0.28 | 3.91E-01 | -0.89 | 8.13E-01 | -0.17 | 5.69E-01 |
| C5orf17   | 0.28 | 3.92E-01 | 0.87  | 1.92E-01 | -0.28 | 6.12E-01 |
| MBLAC2    | 0.28 | 3.92E-01 | 0.32  | 3.76E-01 | -0.56 | 7.12E-01 |
| GTF2IRD1  | 0.27 | 3.92E-01 | 0.67  | 2.51E-01 | -1.34 | 9.09E-01 |
| IL2RA     | 0.27 | 3.92E-01 | 0.94  | 1.74E-01 | -0.26 | 6.04E-01 |

|            |      |          |       |          |       |          |
|------------|------|----------|-------|----------|-------|----------|
| SPEN       | 0.27 | 3.92E-01 | -1.01 | 8.45E-01 | -0.24 | 5.94E-01 |
| OPN5       | 0.27 | 3.92E-01 | 0.33  | 3.69E-01 | -0.78 | 7.82E-01 |
| MRGPRX4    | 0.27 | 3.92E-01 | -0.03 | 5.13E-01 | -0.38 | 6.49E-01 |
| OR10T2     | 0.27 | 3.92E-01 | -1.80 | 9.64E-01 | 1.32  | 9.32E-02 |
| CACUL1     | 0.27 | 3.93E-01 | -2.36 | 9.91E-01 | 1.08  | 1.39E-01 |
| NPL        | 0.27 | 3.93E-01 | 0.38  | 3.52E-01 | -1.15 | 8.76E-01 |
| SYNGAP1    | 0.27 | 3.93E-01 | 0.74  | 2.29E-01 | -1.15 | 8.75E-01 |
| SOCS1      | 0.27 | 3.93E-01 | 0.61  | 2.72E-01 | -1.14 | 8.72E-01 |
| MKL2       | 0.27 | 3.93E-01 | 0.63  | 2.64E-01 | -1.04 | 8.51E-01 |
| NMI        | 0.27 | 3.93E-01 | -0.69 | 7.56E-01 | 1.18  | 1.18E-01 |
| CLEC3B     | 0.27 | 3.93E-01 | -0.98 | 8.37E-01 | 0.38  | 3.50E-01 |
| OR12D2     | 0.27 | 3.93E-01 | 0.04  | 4.85E-01 | 0.31  | 3.79E-01 |
| GID4       | 0.27 | 3.93E-01 | 1.18  | 1.18E-01 | -0.35 | 6.37E-01 |
| FLNB       | 0.27 | 3.93E-01 | 0.80  | 2.13E-01 | 0.21  | 4.17E-01 |
| METTL10    | 0.27 | 3.93E-01 | -0.34 | 6.31E-01 | -0.48 | 6.84E-01 |
| AC019171.1 | 0.27 | 3.93E-01 | 1.36  | 8.77E-02 | -0.21 | 5.84E-01 |
| MPZ        | 0.27 | 3.93E-01 | 1.39  | 8.21E-02 | -0.73 | 7.67E-01 |
| PPP2R2C    | 0.27 | 3.93E-01 | 1.34  | 8.94E-02 | -0.47 | 6.80E-01 |
| FBXO4      | 0.27 | 3.94E-01 | 0.49  | 3.12E-01 | -0.51 | 6.95E-01 |
| RASD1      | 0.27 | 3.94E-01 | 0.63  | 2.64E-01 | -1.11 | 8.66E-01 |
| ASB18      | 0.27 | 3.94E-01 | 1.03  | 1.52E-01 | 1.95  | 2.57E-02 |
| PPAPDC2    | 0.27 | 3.94E-01 | 0.26  | 3.96E-01 | 0.63  | 2.63E-01 |
| C19orf38   | 0.27 | 3.94E-01 | 1.18  | 1.19E-01 | -0.51 | 6.95E-01 |
| GPATCH4    | 0.27 | 3.94E-01 | 0.03  | 4.86E-01 | 1.85  | 3.23E-02 |
| PPP1R14D   | 0.27 | 3.94E-01 | 0.82  | 2.07E-01 | -1.00 | 8.42E-01 |
| GMEB1      | 0.27 | 3.94E-01 | 1.04  | 1.48E-01 | 0.24  | 4.06E-01 |
| ZC3H3      | 0.27 | 3.94E-01 | -0.06 | 5.24E-01 | 0.19  | 4.24E-01 |
| EFCAB7     | 0.27 | 3.94E-01 | 0.25  | 4.03E-01 | -1.42 | 9.22E-01 |
| ZNF77      | 0.27 | 3.94E-01 | -0.07 | 5.29E-01 | 0.84  | 2.00E-01 |
| KLHL5      | 0.27 | 3.94E-01 | 0.05  | 4.79E-01 | -0.32 | 6.25E-01 |
| RFC5       | 0.27 | 3.94E-01 | 0.40  | 3.44E-01 | 0.77  | 2.21E-01 |

|           |      |          |       |          |       |          |
|-----------|------|----------|-------|----------|-------|----------|
| UQCRC2    | 0.27 | 3.94E-01 | 0.61  | 2.71E-01 | 0.04  | 4.84E-01 |
| C8orf49   | 0.27 | 3.94E-01 | -0.30 | 6.17E-01 | 2.41  | 8.08E-03 |
| RPP25     | 0.27 | 3.94E-01 | 0.47  | 3.19E-01 | -1.57 | 9.42E-01 |
| LRIT3     | 0.27 | 3.94E-01 | -1.08 | 8.59E-01 | 0.73  | 2.32E-01 |
| ZNF534    | 0.27 | 3.94E-01 | 0.10  | 4.61E-01 | -0.18 | 5.73E-01 |
| OSBPL6    | 0.27 | 3.94E-01 | -0.26 | 6.04E-01 | 0.11  | 4.56E-01 |
| KRTAP16-1 | 0.27 | 3.94E-01 | 0.65  | 2.57E-01 | -1.49 | 9.32E-01 |
| STARD6    | 0.27 | 3.94E-01 | -0.78 | 7.83E-01 | 0.39  | 3.48E-01 |
| MGAT2     | 0.27 | 3.95E-01 | -0.23 | 5.92E-01 | -0.25 | 5.98E-01 |
| NAF1      | 0.27 | 3.95E-01 | -0.67 | 7.50E-01 | -0.36 | 6.42E-01 |
| CPSF2     | 0.27 | 3.95E-01 | -0.57 | 7.14E-01 | 0.69  | 2.45E-01 |
| RNF130    | 0.27 | 3.95E-01 | 1.84  | 3.25E-02 | 0.05  | 4.78E-01 |
| CARD6     | 0.27 | 3.95E-01 | 1.33  | 9.22E-02 | -0.02 | 5.06E-01 |
| PGAM1     | 0.27 | 3.95E-01 | 0.16  | 4.35E-01 | -0.46 | 6.76E-01 |
| METTL25   | 0.27 | 3.95E-01 | 1.52  | 6.38E-02 | -0.37 | 6.43E-01 |
| TEX36     | 0.27 | 3.95E-01 | 0.68  | 2.49E-01 | -0.29 | 6.13E-01 |
| CADM3     | 0.27 | 3.95E-01 | 0.48  | 3.16E-01 | 0.09  | 4.65E-01 |
| KCND2     | 0.27 | 3.95E-01 | -1.21 | 8.88E-01 | 0.78  | 2.18E-01 |
| ZNF687    | 0.27 | 3.95E-01 | -0.07 | 5.30E-01 | -0.01 | 5.06E-01 |
| TIFAB     | 0.27 | 3.95E-01 | -0.30 | 6.16E-01 | -0.49 | 6.88E-01 |
| UNC93B1   | 0.27 | 3.95E-01 | -0.24 | 5.94E-01 | 1.43  | 7.70E-02 |
| FBXL2     | 0.27 | 3.95E-01 | 0.03  | 4.86E-01 | 2.11  | 1.76E-02 |
| TRAPPC8   | 0.27 | 3.95E-01 | 0.40  | 3.43E-01 | 0.79  | 2.14E-01 |
| C8orf31   | 0.27 | 3.95E-01 | 0.97  | 1.65E-01 | -1.56 | 9.41E-01 |
| AGPAT6    | 0.27 | 3.95E-01 | -0.62 | 7.32E-01 | -0.56 | 7.14E-01 |
| DNAH12    | 0.27 | 3.95E-01 | 1.15  | 1.25E-01 | 1.01  | 1.56E-01 |
| MFN1      | 0.27 | 3.95E-01 | 0.71  | 2.40E-01 | -1.75 | 9.60E-01 |
| ATP5O     | 0.27 | 3.95E-01 | 1.50  | 6.67E-02 | 1.21  | 1.13E-01 |
| FADS3     | 0.27 | 3.95E-01 | -0.84 | 7.99E-01 | 0.91  | 1.82E-01 |
| CCP110    | 0.27 | 3.95E-01 | 0.79  | 2.13E-01 | -0.95 | 8.29E-01 |
| HEXIM2    | 0.27 | 3.95E-01 | 0.65  | 2.57E-01 | 0.71  | 2.39E-01 |

|             |      |          |       |          |       |          |
|-------------|------|----------|-------|----------|-------|----------|
| DIRC1       | 0.27 | 3.95E-01 | -1.52 | 9.36E-01 | 0.87  | 1.92E-01 |
| KIAA1211    | 0.27 | 3.95E-01 | 0.06  | 4.74E-01 | -0.27 | 6.07E-01 |
| RBM46       | 0.27 | 3.95E-01 | -0.72 | 7.64E-01 | -0.18 | 5.70E-01 |
| OR5P2       | 0.27 | 3.95E-01 | -0.38 | 6.49E-01 | 0.12  | 4.54E-01 |
| SCN7A       | 0.27 | 3.95E-01 | -0.45 | 6.74E-01 | -0.53 | 7.02E-01 |
| CARD16      | 0.27 | 3.95E-01 | -1.50 | 9.34E-01 | 1.24  | 1.08E-01 |
| FGF2        | 0.26 | 3.96E-01 | -1.53 | 9.37E-01 | 1.10  | 1.36E-01 |
| LRFN2       | 0.26 | 3.96E-01 | 1.72  | 4.29E-02 | 0.35  | 3.64E-01 |
| SETD4       | 0.26 | 3.96E-01 | -0.38 | 6.47E-01 | -0.57 | 7.16E-01 |
| PHF2        | 0.26 | 3.96E-01 | 0.99  | 1.61E-01 | -0.07 | 5.27E-01 |
| SRRM1       | 0.26 | 3.96E-01 | -0.05 | 5.20E-01 | -0.35 | 6.36E-01 |
| ENOX1       | 0.26 | 3.96E-01 | 0.07  | 4.72E-01 | -0.35 | 6.37E-01 |
| KRT34       | 0.26 | 3.96E-01 | 0.05  | 4.81E-01 | -0.98 | 8.37E-01 |
| MYF5        | 0.26 | 3.96E-01 | 0.76  | 2.23E-01 | -1.66 | 9.51E-01 |
| USP30       | 0.26 | 3.96E-01 | -0.62 | 7.33E-01 | 0.64  | 2.60E-01 |
| IGSF23      | 0.26 | 3.96E-01 | 0.11  | 4.58E-01 | 2.63  | 4.26E-03 |
| AP000322.53 | 0.26 | 3.96E-01 | -0.66 | 7.45E-01 | 0.18  | 4.27E-01 |
| ZIM2        | 0.26 | 3.96E-01 | 0.17  | 4.31E-01 | -1.00 | 8.42E-01 |
| TMEM106B    | 0.26 | 3.96E-01 | 0.52  | 3.01E-01 | -0.52 | 6.98E-01 |
| KRTAP12-2   | 0.26 | 3.96E-01 | 0.46  | 3.23E-01 | -0.69 | 7.56E-01 |
| ELSPBP1     | 0.26 | 3.96E-01 | -0.12 | 5.49E-01 | 0.89  | 1.88E-01 |
| PRKAG3      | 0.26 | 3.96E-01 | 0.39  | 3.47E-01 | -0.69 | 7.56E-01 |
| RUNDC3A     | 0.26 | 3.97E-01 | 0.25  | 3.99E-01 | -1.40 | 9.19E-01 |
| TRIM58      | 0.26 | 3.97E-01 | 0.05  | 4.81E-01 | 0.06  | 4.77E-01 |
| C20orf144   | 0.26 | 3.97E-01 | 0.03  | 4.87E-01 | -0.24 | 5.95E-01 |
| TAF1A       | 0.26 | 3.97E-01 | -0.69 | 7.54E-01 | -0.10 | 5.41E-01 |
| PARP6       | 0.26 | 3.97E-01 | -0.53 | 7.02E-01 | 0.21  | 4.19E-01 |
| TMEM131     | 0.26 | 3.97E-01 | -0.22 | 5.86E-01 | -0.92 | 8.22E-01 |
| NARF        | 0.26 | 3.97E-01 | -0.14 | 5.58E-01 | -0.36 | 6.39E-01 |
| OR8U1       | 0.26 | 3.97E-01 | 0.63  | 2.66E-01 | -1.57 | 9.42E-01 |
| ZBTB1       | 0.26 | 3.97E-01 | -0.40 | 6.55E-01 | -0.19 | 5.77E-01 |

|          |      |          |       |          |       |          |
|----------|------|----------|-------|----------|-------|----------|
| TRMT44   | 0.26 | 3.97E-01 | 0.26  | 3.97E-01 | -0.01 | 5.03E-01 |
| NUB1     | 0.26 | 3.97E-01 | -0.08 | 5.32E-01 | 1.95  | 2.55E-02 |
| CNTROB   | 0.26 | 3.97E-01 | 0.64  | 2.60E-01 | -0.88 | 8.10E-01 |
| TEKT4    | 0.26 | 3.97E-01 | -0.27 | 6.08E-01 | -0.10 | 5.38E-01 |
| CSN2     | 0.26 | 3.97E-01 | -0.67 | 7.50E-01 | -0.16 | 5.63E-01 |
| UBE2L6   | 0.26 | 3.98E-01 | -0.19 | 5.74E-01 | -0.70 | 7.59E-01 |
| ZNF223   | 0.26 | 3.98E-01 | 1.20  | 1.14E-01 | -1.62 | 9.47E-01 |
| SLC2A7   | 0.26 | 3.98E-01 | -0.25 | 5.99E-01 | -0.16 | 5.64E-01 |
| TFAP2D   | 0.26 | 3.98E-01 | 0.25  | 4.02E-01 | -1.24 | 8.92E-01 |
| LRRC69   | 0.26 | 3.98E-01 | 0.09  | 4.64E-01 | -0.43 | 6.67E-01 |
| GPR62    | 0.26 | 3.98E-01 | 0.82  | 2.07E-01 | -1.06 | 8.56E-01 |
| 43163    | 0.26 | 3.98E-01 | 1.13  | 1.29E-01 | -1.20 | 8.85E-01 |
| PRM3     | 0.26 | 3.98E-01 | 0.61  | 2.70E-01 | -2.62 | 9.96E-01 |
| DNMT3A   | 0.26 | 3.98E-01 | 0.62  | 2.67E-01 | 1.57  | 5.85E-02 |
| ATP2B1   | 0.26 | 3.98E-01 | 1.79  | 3.70E-02 | 0.08  | 4.69E-01 |
| ASPHD2   | 0.26 | 3.98E-01 | 0.31  | 3.77E-01 | 0.19  | 4.25E-01 |
| MS4A6A   | 0.26 | 3.98E-01 | -1.03 | 8.48E-01 | 0.57  | 2.85E-01 |
| CXCL1    | 0.26 | 3.98E-01 | 0.00  | 5.01E-01 | -0.36 | 6.41E-01 |
| RPL22    | 0.26 | 3.98E-01 | 1.12  | 1.31E-01 | -1.21 | 8.87E-01 |
| OSGIN1   | 0.26 | 3.98E-01 | -0.61 | 7.30E-01 | 1.34  | 9.08E-02 |
| ARHGAP10 | 0.26 | 3.98E-01 | 1.08  | 1.41E-01 | -1.02 | 8.45E-01 |
| NCR2     | 0.26 | 3.99E-01 | 0.70  | 2.43E-01 | 0.47  | 3.18E-01 |
| ZC3H8    | 0.26 | 3.99E-01 | -0.99 | 8.39E-01 | 0.41  | 3.39E-01 |
| NDFIP2   | 0.26 | 3.99E-01 | 1.09  | 1.37E-01 | -0.84 | 8.01E-01 |
| JAKMIP1  | 0.26 | 3.99E-01 | 1.11  | 1.33E-01 | -0.02 | 5.06E-01 |
| PSMD7    | 0.26 | 3.99E-01 | 0.12  | 4.51E-01 | 0.38  | 3.52E-01 |
| FOXA2    | 0.26 | 3.99E-01 | -0.28 | 6.08E-01 | 0.65  | 2.59E-01 |
| CASZ1    | 0.26 | 3.99E-01 | -0.03 | 5.13E-01 | -0.56 | 7.13E-01 |
| ORAI3    | 0.26 | 3.99E-01 | -2.08 | 9.81E-01 | 0.88  | 1.90E-01 |
| PPA2     | 0.26 | 3.99E-01 | 1.57  | 5.83E-02 | 0.08  | 4.67E-01 |
| ADTRP    | 0.26 | 3.99E-01 | 0.04  | 4.83E-01 | -0.32 | 6.25E-01 |

|            |      |          |       |          |       |          |
|------------|------|----------|-------|----------|-------|----------|
| TAF13      | 0.26 | 3.99E-01 | -0.56 | 7.12E-01 | -0.10 | 5.41E-01 |
| IL7R       | 0.25 | 3.99E-01 | 0.48  | 3.17E-01 | -0.38 | 6.47E-01 |
| SPATA21    | 0.25 | 3.99E-01 | -0.05 | 5.18E-01 | -1.53 | 9.37E-01 |
| UBE2T      | 0.25 | 3.99E-01 | -0.08 | 5.32E-01 | -0.92 | 8.21E-01 |
| CEACAM19   | 0.25 | 4.00E-01 | 2.34  | 9.65E-03 | 2.85  | 2.16E-03 |
| STAG3      | 0.25 | 4.00E-01 | -0.74 | 7.70E-01 | 0.05  | 4.82E-01 |
| TIRAP      | 0.25 | 4.00E-01 | -0.46 | 6.77E-01 | 0.53  | 2.99E-01 |
| JSRP1      | 0.25 | 4.00E-01 | -0.33 | 6.30E-01 | -0.53 | 7.01E-01 |
| TSPAN15    | 0.25 | 4.00E-01 | 0.74  | 2.29E-01 | 1.06  | 1.46E-01 |
| EXOC3L1    | 0.25 | 4.00E-01 | -0.54 | 7.06E-01 | -0.25 | 6.00E-01 |
| CASP10     | 0.25 | 4.00E-01 | 0.63  | 2.65E-01 | -1.00 | 8.42E-01 |
| SHCBP1L    | 0.25 | 4.00E-01 | -0.02 | 5.08E-01 | -0.67 | 7.47E-01 |
| TTC13      | 0.25 | 4.00E-01 | 0.91  | 1.81E-01 | -0.40 | 6.56E-01 |
| CLSTN1     | 0.25 | 4.00E-01 | 0.88  | 1.90E-01 | -0.67 | 7.48E-01 |
| CPA1       | 0.25 | 4.00E-01 | 1.18  | 1.18E-01 | -0.21 | 5.85E-01 |
| TOMM70A    | 0.25 | 4.00E-01 | -0.09 | 5.37E-01 | -0.08 | 5.31E-01 |
| ALPK3      | 0.25 | 4.00E-01 | -0.76 | 7.77E-01 | 0.65  | 2.59E-01 |
| POT1       | 0.25 | 4.00E-01 | -0.97 | 8.34E-01 | 1.07  | 1.42E-01 |
| SLC39A9    | 0.25 | 4.00E-01 | -0.18 | 5.72E-01 | -0.32 | 6.26E-01 |
| ATG16L1    | 0.25 | 4.00E-01 | 1.91  | 2.81E-02 | 0.45  | 3.27E-01 |
| GTF2A1L    | 0.25 | 4.00E-01 | 0.12  | 4.51E-01 | -0.87 | 8.08E-01 |
| IP6K3      | 0.25 | 4.00E-01 | -0.78 | 7.83E-01 | 0.04  | 4.85E-01 |
| IL20RB     | 0.25 | 4.00E-01 | -0.09 | 5.37E-01 | -0.09 | 5.36E-01 |
| DEFB119    | 0.25 | 4.00E-01 | 1.91  | 2.80E-02 | 0.86  | 1.96E-01 |
| ANG        | 0.25 | 4.01E-01 | 0.29  | 3.85E-01 | -1.74 | 9.59E-01 |
| FAM151B    | 0.25 | 4.01E-01 | -0.77 | 7.78E-01 | -0.47 | 6.81E-01 |
| VEZF1      | 0.25 | 4.01E-01 | -1.06 | 8.55E-01 | 1.39  | 8.26E-02 |
| LTK        | 0.25 | 4.01E-01 | 0.20  | 4.19E-01 | -0.91 | 8.18E-01 |
| CRYBG3     | 0.25 | 4.01E-01 | 0.37  | 3.57E-01 | -1.14 | 8.73E-01 |
| DNAH17-AS1 | 0.25 | 4.01E-01 | 1.27  | 1.02E-01 | 0.93  | 1.76E-01 |
| SNAPIN     | 0.25 | 4.01E-01 | -1.08 | 8.60E-01 | 1.73  | 4.14E-02 |

|               |      |          |       |          |       |          |
|---------------|------|----------|-------|----------|-------|----------|
| CA11          | 0.25 | 4.01E-01 | -1.33 | 9.08E-01 | 0.58  | 2.80E-01 |
| ZNF749        | 0.25 | 4.01E-01 | 0.58  | 2.81E-01 | -0.21 | 5.83E-01 |
| HEXDC         | 0.25 | 4.01E-01 | -0.07 | 5.29E-01 | -0.76 | 7.76E-01 |
| DUSP8         | 0.25 | 4.01E-01 | 1.91  | 2.83E-02 | 0.09  | 4.64E-01 |
| SMURF1        | 0.25 | 4.01E-01 | -0.48 | 6.85E-01 | 0.41  | 3.42E-01 |
| DNAH5         | 0.25 | 4.01E-01 | 1.86  | 3.15E-02 | 1.11  | 1.33E-01 |
| YOD1          | 0.25 | 4.01E-01 | 0.71  | 2.40E-01 | -0.73 | 7.68E-01 |
| TBC1D24       | 0.25 | 4.01E-01 | 0.32  | 3.73E-01 | -0.18 | 5.72E-01 |
| VAMP1         | 0.25 | 4.01E-01 | 0.93  | 1.76E-01 | -0.26 | 6.03E-01 |
| ENTHD1        | 0.25 | 4.01E-01 | -1.01 | 8.43E-01 | 1.61  | 5.40E-02 |
| RND2          | 0.25 | 4.02E-01 | -0.80 | 7.88E-01 | 0.56  | 2.88E-01 |
| MCHR1         | 0.25 | 4.02E-01 | -1.05 | 8.54E-01 | 1.86  | 3.15E-02 |
| TOR1AIP1      | 0.25 | 4.02E-01 | -0.23 | 5.90E-01 | 0.37  | 3.55E-01 |
| HDAC7         | 0.25 | 4.02E-01 | -0.99 | 8.39E-01 | 2.12  | 1.70E-02 |
| RMDN3         | 0.25 | 4.02E-01 | 0.59  | 2.79E-01 | -1.11 | 8.67E-01 |
| SH3GLB1       | 0.25 | 4.02E-01 | -0.42 | 6.64E-01 | 0.92  | 1.78E-01 |
| ANK3          | 0.25 | 4.02E-01 | 0.54  | 2.93E-01 | -0.43 | 6.68E-01 |
| OR51L1        | 0.25 | 4.02E-01 | -0.09 | 5.35E-01 | 0.10  | 4.59E-01 |
| C21orf128     | 0.25 | 4.02E-01 | 0.16  | 4.38E-01 | -0.13 | 5.54E-01 |
| CTD-2210P24.4 | 0.25 | 4.02E-01 | -0.65 | 7.41E-01 | 1.82  | 3.47E-02 |
| PCGF2         | 0.25 | 4.02E-01 | 0.40  | 3.43E-01 | -0.23 | 5.91E-01 |
| FAM8A1        | 0.25 | 4.02E-01 | -0.71 | 7.60E-01 | 0.15  | 4.42E-01 |
| KLF12         | 0.25 | 4.02E-01 | -0.69 | 7.54E-01 | 1.26  | 1.03E-01 |
| ST7L          | 0.25 | 4.02E-01 | 0.68  | 2.49E-01 | -1.38 | 9.16E-01 |
| POPDC3        | 0.25 | 4.02E-01 | 0.24  | 4.04E-01 | -0.28 | 6.10E-01 |
| HSPB6         | 0.25 | 4.02E-01 | -0.16 | 5.63E-01 | 0.57  | 2.83E-01 |
| SLC25A44      | 0.25 | 4.02E-01 | -0.23 | 5.92E-01 | 1.23  | 1.09E-01 |
| LTBP3         | 0.25 | 4.03E-01 | 0.20  | 4.22E-01 | -0.98 | 8.35E-01 |
| RTP3          | 0.25 | 4.03E-01 | -1.01 | 8.44E-01 | 0.42  | 3.36E-01 |
| EFEMP1        | 0.25 | 4.03E-01 | -0.25 | 6.00E-01 | -0.09 | 5.35E-01 |
| FAM188B2      | 0.25 | 4.03E-01 | 0.52  | 3.02E-01 | -0.30 | 6.17E-01 |



|          |      |          |       |          |       |          |
|----------|------|----------|-------|----------|-------|----------|
| GPR37L1  | 0.25 | 4.03E-01 | -0.05 | 5.18E-01 | -1.01 | 8.44E-01 |
| MOCS1    | 0.25 | 4.03E-01 | 1.18  | 1.19E-01 | -0.46 | 6.76E-01 |
| TRIM46   | 0.25 | 4.03E-01 | -0.40 | 6.56E-01 | -0.28 | 6.11E-01 |
| ATP5F1   | 0.25 | 4.03E-01 | -0.76 | 7.76E-01 | 1.78  | 3.78E-02 |
| PRSS35   | 0.25 | 4.03E-01 | -0.32 | 6.26E-01 | 2.00  | 2.27E-02 |
| HGD      | 0.25 | 4.03E-01 | 0.98  | 1.63E-01 | -0.89 | 8.13E-01 |
| PYCR2    | 0.25 | 4.03E-01 | -0.59 | 7.23E-01 | -0.37 | 6.43E-01 |
| TMEM167A | 0.25 | 4.03E-01 | 1.16  | 1.23E-01 | 0.52  | 3.02E-01 |
| USP38    | 0.25 | 4.03E-01 | -0.67 | 7.50E-01 | -0.04 | 5.15E-01 |
| HIST1H3H | 0.25 | 4.03E-01 | 0.32  | 3.74E-01 | 2.16  | 1.53E-02 |
| ITPA     | 0.25 | 4.03E-01 | -0.65 | 7.43E-01 | -0.13 | 5.54E-01 |
| C16orf47 | 0.24 | 4.03E-01 | 0.97  | 1.66E-01 | -0.28 | 6.08E-01 |
| PPIE     | 0.24 | 4.03E-01 | 0.02  | 4.91E-01 | -1.37 | 9.15E-01 |
| ARHGEF11 | 0.24 | 4.03E-01 | -0.60 | 7.24E-01 | -0.06 | 5.24E-01 |
| RAD50    | 0.24 | 4.04E-01 | -0.67 | 7.48E-01 | 1.65  | 4.94E-02 |
| PTPRA    | 0.24 | 4.04E-01 | -0.17 | 5.69E-01 | -0.66 | 7.47E-01 |
| NIM1K    | 0.24 | 4.04E-01 | -1.41 | 9.21E-01 | 0.18  | 4.29E-01 |
| GPX4     | 0.24 | 4.04E-01 | 0.88  | 1.88E-01 | 1.42  | 7.82E-02 |
| CD74     | 0.24 | 4.04E-01 | 0.62  | 2.67E-01 | -0.63 | 7.37E-01 |
| ASXL3    | 0.24 | 4.04E-01 | 0.15  | 4.42E-01 | -0.44 | 6.69E-01 |
| TSPAN13  | 0.24 | 4.04E-01 | -0.97 | 8.33E-01 | 0.07  | 4.71E-01 |
| DROSHA   | 0.24 | 4.04E-01 | -0.67 | 7.49E-01 | -0.05 | 5.20E-01 |
| BRMS1L   | 0.24 | 4.04E-01 | -0.72 | 7.63E-01 | 0.77  | 2.21E-01 |
| SCLY     | 0.24 | 4.04E-01 | 0.25  | 4.02E-01 | -0.37 | 6.44E-01 |
| FREM2    | 0.24 | 4.04E-01 | 0.19  | 4.25E-01 | -0.15 | 5.61E-01 |
| BAZ2A    | 0.24 | 4.04E-01 | 0.86  | 1.94E-01 | -1.13 | 8.72E-01 |
| GNG8     | 0.24 | 4.04E-01 | -0.01 | 5.04E-01 | -0.23 | 5.90E-01 |
| HARS     | 0.24 | 4.04E-01 | -0.81 | 7.91E-01 | 0.06  | 4.77E-01 |
| LAMP3    | 0.24 | 4.04E-01 | 0.45  | 3.26E-01 | 0.71  | 2.38E-01 |
| GINS3    | 0.24 | 4.04E-01 | 0.84  | 2.01E-01 | -2.30 | 9.89E-01 |
| RPS6KA2  | 0.24 | 4.04E-01 | -0.34 | 6.31E-01 | -0.96 | 8.32E-01 |

|           |      |          |       |          |       |          |
|-----------|------|----------|-------|----------|-------|----------|
| TMEM132A  | 0.24 | 4.04E-01 | -0.94 | 8.25E-01 | 0.10  | 4.62E-01 |
| LXN       | 0.24 | 4.04E-01 | 1.29  | 9.81E-02 | -1.08 | 8.60E-01 |
| OR52E2    | 0.24 | 4.04E-01 | 0.41  | 3.40E-01 | 0.17  | 4.34E-01 |
| ATP10B    | 0.24 | 4.05E-01 | -0.23 | 5.91E-01 | -0.81 | 7.90E-01 |
| ZADH2     | 0.24 | 4.05E-01 | -0.39 | 6.52E-01 | -0.56 | 7.11E-01 |
| TUBA3E    | 0.24 | 4.05E-01 | 0.74  | 2.29E-01 | -1.17 | 8.80E-01 |
| RFX6      | 0.24 | 4.05E-01 | 0.78  | 2.17E-01 | -1.35 | 9.11E-01 |
| RNF121    | 0.24 | 4.05E-01 | 0.51  | 3.07E-01 | -0.23 | 5.92E-01 |
| C4orf48   | 0.24 | 4.05E-01 | 0.79  | 2.16E-01 | -1.36 | 9.14E-01 |
| LSP1      | 0.24 | 4.05E-01 | 0.24  | 4.04E-01 | -0.96 | 8.31E-01 |
| GGT1      | 0.24 | 4.05E-01 | 1.00  | 1.60E-01 | -0.83 | 7.98E-01 |
| KIAA1024  | 0.24 | 4.05E-01 | 0.16  | 4.35E-01 | 1.72  | 4.29E-02 |
| RAMP2     | 0.24 | 4.05E-01 | -0.60 | 7.26E-01 | -0.13 | 5.53E-01 |
| ARHGAP11A | 0.24 | 4.05E-01 | -1.52 | 9.36E-01 | 0.51  | 3.04E-01 |
| PEAK1     | 0.24 | 4.05E-01 | -1.59 | 9.44E-01 | 0.64  | 2.61E-01 |
| MTRNR2L1  | 0.24 | 4.05E-01 | -1.22 | 8.89E-01 | 0.63  | 2.64E-01 |
| OSTF1     | 0.24 | 4.05E-01 | -0.22 | 5.86E-01 | 0.13  | 4.50E-01 |
| KIAA1161  | 0.24 | 4.05E-01 | -1.03 | 8.49E-01 | 1.06  | 1.44E-01 |
| CCNF      | 0.24 | 4.05E-01 | 1.19  | 1.17E-01 | -0.67 | 7.49E-01 |
| EVA1A     | 0.24 | 4.06E-01 | -0.20 | 5.81E-01 | 0.45  | 3.25E-01 |
| ANKRD42   | 0.24 | 4.06E-01 | -1.80 | 9.64E-01 | 1.63  | 5.14E-02 |
| SPR       | 0.24 | 4.06E-01 | -0.55 | 7.09E-01 | 0.02  | 4.91E-01 |
| KATNA1    | 0.24 | 4.06E-01 | -0.60 | 7.24E-01 | 0.20  | 4.22E-01 |
| NR5A2     | 0.24 | 4.06E-01 | -0.13 | 5.50E-01 | 0.56  | 2.87E-01 |
| C6orf106  | 0.24 | 4.06E-01 | -1.54 | 9.39E-01 | 1.87  | 3.07E-02 |
| SMARCAL1  | 0.24 | 4.06E-01 | -0.75 | 7.73E-01 | 2.33  | 9.96E-03 |
| IQUB      | 0.24 | 4.06E-01 | 0.80  | 2.11E-01 | -0.16 | 5.62E-01 |
| MAGI3     | 0.24 | 4.06E-01 | -0.51 | 6.96E-01 | -0.72 | 7.65E-01 |
| NDUFAF4   | 0.24 | 4.06E-01 | -1.39 | 9.17E-01 | 0.36  | 3.61E-01 |
| USMG5     | 0.24 | 4.06E-01 | -0.46 | 6.76E-01 | -0.45 | 6.73E-01 |
| GAK       | 0.24 | 4.06E-01 | -0.10 | 5.41E-01 | 1.83  | 3.39E-02 |

|           |      |          |       |          |       |          |
|-----------|------|----------|-------|----------|-------|----------|
| ALOX12    | 0.24 | 4.06E-01 | 0.94  | 1.73E-01 | -1.74 | 9.59E-01 |
| SCHIP1    | 0.24 | 4.06E-01 | 0.20  | 4.20E-01 | -0.57 | 7.16E-01 |
| PRR22     | 0.24 | 4.06E-01 | -0.42 | 6.62E-01 | 0.16  | 4.37E-01 |
| LHX2      | 0.24 | 4.06E-01 | -0.25 | 5.98E-01 | 1.67  | 4.72E-02 |
| NDUFV3    | 0.24 | 4.07E-01 | -0.08 | 5.33E-01 | 0.04  | 4.83E-01 |
| RNASE4    | 0.24 | 4.07E-01 | 0.29  | 3.87E-01 | -1.83 | 9.66E-01 |
| BMPER     | 0.24 | 4.07E-01 | 0.62  | 2.67E-01 | 0.24  | 4.06E-01 |
| SZRD1     | 0.24 | 4.07E-01 | -0.17 | 5.66E-01 | -1.09 | 8.62E-01 |
| BMP7      | 0.24 | 4.07E-01 | -0.34 | 6.32E-01 | 1.11  | 1.33E-01 |
| NPHP4     | 0.24 | 4.07E-01 | 0.64  | 2.60E-01 | -0.49 | 6.89E-01 |
| SCN1A     | 0.24 | 4.07E-01 | -0.23 | 5.92E-01 | 0.64  | 2.61E-01 |
| NUPL1     | 0.24 | 4.07E-01 | -0.61 | 7.29E-01 | 0.35  | 3.63E-01 |
| MAVS      | 0.24 | 4.07E-01 | 0.35  | 3.62E-01 | -1.11 | 8.66E-01 |
| RAB30     | 0.24 | 4.07E-01 | -0.18 | 5.72E-01 | 1.62  | 5.31E-02 |
| LMX1B     | 0.24 | 4.07E-01 | 0.54  | 2.96E-01 | 1.11  | 1.33E-01 |
| TMED5     | 0.24 | 4.07E-01 | 0.06  | 4.76E-01 | 1.71  | 4.36E-02 |
| HSD17B7   | 0.24 | 4.07E-01 | 0.01  | 4.96E-01 | 0.33  | 3.71E-01 |
| FEZ2      | 0.23 | 4.07E-01 | -1.63 | 9.49E-01 | 0.70  | 2.41E-01 |
| C14orf142 | 0.23 | 4.07E-01 | -0.50 | 6.92E-01 | -0.16 | 5.62E-01 |
| BTNL9     | 0.23 | 4.07E-01 | -0.91 | 8.20E-01 | -0.29 | 6.14E-01 |
| SLC5A1    | 0.23 | 4.07E-01 | -0.42 | 6.64E-01 | 1.20  | 1.15E-01 |
| TRIM72    | 0.23 | 4.07E-01 | 0.55  | 2.92E-01 | 0.44  | 3.31E-01 |
| ENC1      | 0.23 | 4.07E-01 | -0.27 | 6.08E-01 | -0.44 | 6.70E-01 |
| CYP27C1   | 0.23 | 4.07E-01 | -1.13 | 8.71E-01 | 0.23  | 4.10E-01 |
| MIB1      | 0.23 | 4.08E-01 | 0.19  | 4.24E-01 | -0.93 | 8.25E-01 |
| NUP153    | 0.23 | 4.08E-01 | -0.81 | 7.92E-01 | 0.67  | 2.50E-01 |
| EXOSC7    | 0.23 | 4.08E-01 | -1.02 | 8.46E-01 | 0.46  | 3.23E-01 |
| DLX6      | 0.23 | 4.08E-01 | 0.77  | 2.20E-01 | 0.68  | 2.49E-01 |
| CTSO      | 0.23 | 4.08E-01 | 0.92  | 1.80E-01 | -0.64 | 7.39E-01 |
| HAAO      | 0.23 | 4.08E-01 | 0.17  | 4.34E-01 | -0.30 | 6.18E-01 |
| MZT2B     | 0.23 | 4.08E-01 | 0.88  | 1.90E-01 | -0.87 | 8.08E-01 |

|            |      |          |       |          |       |          |
|------------|------|----------|-------|----------|-------|----------|
| RHO        | 0.23 | 4.08E-01 | -1.77 | 9.62E-01 | 0.85  | 1.98E-01 |
| HSD3B1     | 0.23 | 4.08E-01 | -0.89 | 8.14E-01 | 0.77  | 2.21E-01 |
| ARHGAP5    | 0.23 | 4.08E-01 | 0.52  | 3.01E-01 | 0.74  | 2.29E-01 |
| LEPREL4    | 0.23 | 4.08E-01 | 0.18  | 4.27E-01 | -0.24 | 5.94E-01 |
| SON        | 0.23 | 4.08E-01 | 0.60  | 2.74E-01 | -1.81 | 9.65E-01 |
| CCDC12     | 0.23 | 4.08E-01 | -1.22 | 8.89E-01 | 1.69  | 4.51E-02 |
| ERAP2      | 0.23 | 4.08E-01 | 0.14  | 4.43E-01 | 0.82  | 2.07E-01 |
| COX8C      | 0.23 | 4.08E-01 | 0.33  | 3.72E-01 | -0.39 | 6.51E-01 |
| CCDC23     | 0.23 | 4.08E-01 | 0.17  | 4.34E-01 | -0.11 | 5.44E-01 |
| KCNAB3     | 0.23 | 4.08E-01 | 0.46  | 3.24E-01 | -1.01 | 8.43E-01 |
| CLIP2      | 0.23 | 4.08E-01 | 0.01  | 4.95E-01 | -0.74 | 7.71E-01 |
| SNTA1      | 0.23 | 4.08E-01 | 0.73  | 2.31E-01 | -0.75 | 7.73E-01 |
| TCEA1      | 0.23 | 4.08E-01 | -0.67 | 7.47E-01 | 0.11  | 4.57E-01 |
| TMEM239    | 0.23 | 4.08E-01 | -0.37 | 6.44E-01 | -0.22 | 5.86E-01 |
| CLEC4M     | 0.23 | 4.09E-01 | -0.03 | 5.10E-01 | 0.75  | 2.28E-01 |
| KHK        | 0.23 | 4.09E-01 | 1.53  | 6.31E-02 | 0.47  | 3.21E-01 |
| MPDZ       | 0.23 | 4.09E-01 | -0.48 | 6.84E-01 | 1.56  | 5.99E-02 |
| IL10       | 0.23 | 4.09E-01 | 0.66  | 2.53E-01 | 0.53  | 2.97E-01 |
| TADA2B     | 0.23 | 4.09E-01 | -0.53 | 7.01E-01 | -0.07 | 5.27E-01 |
| AOAH       | 0.23 | 4.09E-01 | 0.68  | 2.49E-01 | 0.66  | 2.54E-01 |
| TMEM183A   | 0.23 | 4.09E-01 | 0.56  | 2.88E-01 | -0.93 | 8.23E-01 |
| RBM14-RBM4 | 0.23 | 4.09E-01 | 0.13  | 4.47E-01 | -1.52 | 9.36E-01 |
| ACTN4      | 0.23 | 4.09E-01 | 0.36  | 3.60E-01 | -1.07 | 8.58E-01 |
| TOR1A      | 0.23 | 4.09E-01 | -0.35 | 6.37E-01 | 1.01  | 1.56E-01 |
| FGF10      | 0.23 | 4.09E-01 | -0.55 | 7.09E-01 | 0.38  | 3.54E-01 |
| WNT5B      | 0.23 | 4.09E-01 | -1.10 | 8.64E-01 | 0.78  | 2.18E-01 |
| E2F5       | 0.23 | 4.09E-01 | -0.47 | 6.81E-01 | 0.05  | 4.79E-01 |
| DSCAM      | 0.23 | 4.09E-01 | -0.02 | 5.07E-01 | 0.46  | 3.22E-01 |
| SPRYD3     | 0.23 | 4.10E-01 | 0.59  | 2.77E-01 | -0.61 | 7.29E-01 |
| MPEG1      | 0.23 | 4.10E-01 | 1.07  | 1.43E-01 | -0.36 | 6.41E-01 |
| TERT       | 0.23 | 4.10E-01 | -0.32 | 6.24E-01 | 0.04  | 4.85E-01 |

|         |      |          |       |          |       |          |
|---------|------|----------|-------|----------|-------|----------|
| DLL4    | 0.23 | 4.10E-01 | 0.17  | 4.34E-01 | -1.06 | 8.55E-01 |
| POLR2J  | 0.23 | 4.10E-01 | 0.74  | 2.31E-01 | 0.25  | 4.01E-01 |
| CCNT2   | 0.23 | 4.10E-01 | -0.20 | 5.78E-01 | 0.14  | 4.45E-01 |
| SPATA4  | 0.23 | 4.10E-01 | -0.38 | 6.49E-01 | -0.19 | 5.76E-01 |
| ATXN1   | 0.23 | 4.10E-01 | 0.67  | 2.51E-01 | -0.03 | 5.12E-01 |
| MAP2K1  | 0.23 | 4.10E-01 | 0.02  | 4.92E-01 | 0.91  | 1.82E-01 |
| LYRM5   | 0.23 | 4.10E-01 | 2.50  | 6.22E-03 | 0.63  | 2.66E-01 |
| PTAR1   | 0.23 | 4.10E-01 | 0.30  | 3.82E-01 | -0.18 | 5.71E-01 |
| FAM181A | 0.23 | 4.10E-01 | -0.88 | 8.12E-01 | 0.03  | 4.86E-01 |
| KCTD8   | 0.23 | 4.10E-01 | 0.32  | 3.76E-01 | -0.46 | 6.77E-01 |
| INTS5   | 0.23 | 4.10E-01 | 0.01  | 4.98E-01 | -0.22 | 5.85E-01 |
| PCDH8   | 0.23 | 4.10E-01 | 1.13  | 1.30E-01 | -0.58 | 7.20E-01 |
| FOXN1   | 0.23 | 4.11E-01 | -0.95 | 8.28E-01 | 0.47  | 3.20E-01 |
| ENKD1   | 0.23 | 4.11E-01 | 0.98  | 1.63E-01 | 1.33  | 9.17E-02 |
| GAL3ST4 | 0.23 | 4.11E-01 | -0.36 | 6.42E-01 | 1.20  | 1.15E-01 |
| ELMO2   | 0.23 | 4.11E-01 | -0.92 | 8.21E-01 | 0.25  | 4.01E-01 |
| OR10A3  | 0.23 | 4.11E-01 | -0.66 | 7.46E-01 | -0.03 | 5.13E-01 |
| FANCM   | 0.23 | 4.11E-01 | 0.75  | 2.27E-01 | 1.30  | 9.71E-02 |
| TRABD2B | 0.23 | 4.11E-01 | 0.72  | 2.34E-01 | 1.21  | 1.14E-01 |
| UBE2G2  | 0.23 | 4.11E-01 | -0.79 | 7.86E-01 | -0.24 | 5.95E-01 |
| FRRS1L  | 0.22 | 4.11E-01 | 1.26  | 1.04E-01 | -2.76 | 9.97E-01 |
| ZFYVE28 | 0.22 | 4.11E-01 | 0.27  | 3.92E-01 | -0.46 | 6.78E-01 |
| TEX14   | 0.22 | 4.11E-01 | 1.34  | 9.08E-02 | -0.59 | 7.22E-01 |
| CASQ1   | 0.22 | 4.11E-01 | 0.76  | 2.23E-01 | -1.76 | 9.61E-01 |
| GABARAP | 0.22 | 4.11E-01 | -0.54 | 7.06E-01 | -0.15 | 5.61E-01 |
| TMEM238 | 0.22 | 4.11E-01 | 0.03  | 4.87E-01 | -0.99 | 8.40E-01 |
| GARS    | 0.22 | 4.11E-01 | -0.64 | 7.38E-01 | 0.47  | 3.20E-01 |
| PRSS38  | 0.22 | 4.12E-01 | -0.86 | 8.06E-01 | 0.33  | 3.72E-01 |
| GCSAML  | 0.22 | 4.12E-01 | 0.71  | 2.40E-01 | -2.33 | 9.90E-01 |
| NR2E1   | 0.22 | 4.12E-01 | 0.47  | 3.18E-01 | 0.25  | 4.03E-01 |
| SPATA2L | 0.22 | 4.12E-01 | -0.12 | 5.47E-01 | 0.46  | 3.22E-01 |

|                  |      |          |       |          |       |          |
|------------------|------|----------|-------|----------|-------|----------|
| HS2ST1           | 0.22 | 4.12E-01 | -0.14 | 5.54E-01 | 0.33  | 3.71E-01 |
| KRTAP12-4        | 0.22 | 4.12E-01 | -0.44 | 6.71E-01 | -0.25 | 6.01E-01 |
| KLHL25           | 0.22 | 4.12E-01 | -0.97 | 8.33E-01 | -0.14 | 5.55E-01 |
| UPP1             | 0.22 | 4.12E-01 | -0.29 | 6.14E-01 | 1.65  | 4.98E-02 |
| RGS19            | 0.22 | 4.12E-01 | 1.26  | 1.03E-01 | 0.33  | 3.72E-01 |
| ZNF792           | 0.22 | 4.12E-01 | -1.72 | 9.58E-01 | 0.78  | 2.18E-01 |
| JAKMIP2          | 0.22 | 4.12E-01 | 0.09  | 4.65E-01 | -0.41 | 6.60E-01 |
| SCAI             | 0.22 | 4.12E-01 | -0.28 | 6.11E-01 | -0.30 | 6.19E-01 |
| NLRX1            | 0.22 | 4.12E-01 | 0.44  | 3.30E-01 | -1.15 | 8.75E-01 |
| ARHGEF3          | 0.22 | 4.12E-01 | 0.41  | 3.42E-01 | 1.59  | 5.64E-02 |
| AZGP1            | 0.22 | 4.12E-01 | 0.93  | 1.76E-01 | -0.18 | 5.72E-01 |
| RAET1G           | 0.22 | 4.12E-01 | -0.96 | 8.32E-01 | 0.28  | 3.90E-01 |
| ACVR1B           | 0.22 | 4.12E-01 | 0.50  | 3.10E-01 | -0.44 | 6.70E-01 |
| CRYZL1           | 0.22 | 4.13E-01 | 0.58  | 2.82E-01 | -2.17 | 9.85E-01 |
| ECHDC2           | 0.22 | 4.13E-01 | 1.09  | 1.38E-01 | -0.28 | 6.09E-01 |
| C21orf54         | 0.22 | 4.13E-01 | -0.04 | 5.16E-01 | -1.16 | 8.78E-01 |
| PLA2G4E          | 0.22 | 4.13E-01 | -0.08 | 5.34E-01 | 0.35  | 3.64E-01 |
| FBXL8            | 0.22 | 4.13E-01 | -0.86 | 8.05E-01 | -0.15 | 5.59E-01 |
| C4orf33          | 0.22 | 4.13E-01 | -0.34 | 6.32E-01 | 0.25  | 4.01E-01 |
| DUSP18           | 0.22 | 4.13E-01 | 0.60  | 2.74E-01 | -0.23 | 5.92E-01 |
| FLT3LG           | 0.22 | 4.13E-01 | 0.10  | 4.60E-01 | 1.08  | 1.40E-01 |
| CHST1            | 0.22 | 4.13E-01 | -0.77 | 7.78E-01 | 0.16  | 4.36E-01 |
| VAT1             | 0.22 | 4.13E-01 | -0.41 | 6.58E-01 | 0.08  | 4.67E-01 |
| SLC33A1          | 0.22 | 4.13E-01 | 0.71  | 2.39E-01 | 0.22  | 4.14E-01 |
| REN              | 0.22 | 4.13E-01 | -0.17 | 5.69E-01 | 0.00  | 4.99E-01 |
| RABEPK           | 0.22 | 4.14E-01 | -0.37 | 6.43E-01 | -0.38 | 6.47E-01 |
| RAC3             | 0.22 | 4.14E-01 | 0.58  | 2.82E-01 | 0.10  | 4.58E-01 |
| RRM2             | 0.22 | 4.14E-01 | 0.13  | 4.46E-01 | -0.67 | 7.48E-01 |
| LL22NC03-75H12.2 | 0.22 | 4.14E-01 | -0.02 | 5.08E-01 | 1.10  | 1.35E-01 |
| NUF2             | 0.22 | 4.14E-01 | -1.43 | 9.24E-01 | 0.24  | 4.05E-01 |
| IFNL3            | 0.22 | 4.14E-01 | -0.71 | 7.61E-01 | 0.11  | 4.58E-01 |

|          |      |          |       |          |       |          |
|----------|------|----------|-------|----------|-------|----------|
| MKX      | 0.22 | 4.14E-01 | -0.20 | 5.79E-01 | 1.19  | 1.18E-01 |
| DLK2     | 0.22 | 4.14E-01 | 1.69  | 4.58E-02 | 0.53  | 2.99E-01 |
| CREB3    | 0.22 | 4.14E-01 | -0.26 | 6.01E-01 | -0.30 | 6.20E-01 |
| COX4I2   | 0.22 | 4.14E-01 | -1.99 | 9.77E-01 | 0.92  | 1.79E-01 |
| IDNK     | 0.22 | 4.14E-01 | -0.12 | 5.49E-01 | 0.75  | 2.26E-01 |
| FAM189A2 | 0.22 | 4.14E-01 | 0.07  | 4.72E-01 | -1.12 | 8.68E-01 |
| DENND1A  | 0.22 | 4.14E-01 | 1.94  | 2.63E-02 | -0.59 | 7.22E-01 |
| C10orf88 | 0.22 | 4.14E-01 | 0.97  | 1.67E-01 | -1.28 | 9.00E-01 |
| HAMP     | 0.22 | 4.14E-01 | 0.58  | 2.83E-01 | -0.65 | 7.41E-01 |
| IFNA2    | 0.22 | 4.14E-01 | 0.98  | 1.64E-01 | -1.49 | 9.32E-01 |
| RPF1     | 0.22 | 4.14E-01 | 0.80  | 2.11E-01 | -0.49 | 6.87E-01 |
| HCAR2    | 0.22 | 4.15E-01 | -0.08 | 5.32E-01 | -0.45 | 6.74E-01 |
| ZNF831   | 0.22 | 4.15E-01 | -0.44 | 6.70E-01 | -0.54 | 7.05E-01 |
| KRT33B   | 0.22 | 4.15E-01 | 0.22  | 4.13E-01 | -0.97 | 8.34E-01 |
| SUGP1    | 0.22 | 4.15E-01 | -0.72 | 7.64E-01 | -0.01 | 5.03E-01 |
| RASGRP3  | 0.22 | 4.15E-01 | -0.97 | 8.34E-01 | 1.19  | 1.17E-01 |
| SFRP5    | 0.22 | 4.15E-01 | -0.15 | 5.61E-01 | -0.15 | 5.60E-01 |
| PRSS57   | 0.22 | 4.15E-01 | -0.38 | 6.48E-01 | 0.27  | 3.93E-01 |
| STK32A   | 0.22 | 4.15E-01 | -0.95 | 8.30E-01 | 0.63  | 2.66E-01 |
| MRPS33   | 0.21 | 4.15E-01 | -0.41 | 6.59E-01 | 0.03  | 4.86E-01 |
| OR2A5    | 0.21 | 4.15E-01 | 0.39  | 3.50E-01 | -0.55 | 7.09E-01 |
| NOLC1    | 0.21 | 4.15E-01 | 0.41  | 3.43E-01 | 1.86  | 3.17E-02 |
| C11orf83 | 0.21 | 4.15E-01 | -0.23 | 5.91E-01 | 0.01  | 4.96E-01 |
| TMEM133  | 0.21 | 4.15E-01 | -0.15 | 5.59E-01 | -0.64 | 7.39E-01 |
| SAP18    | 0.21 | 4.15E-01 | -1.39 | 9.18E-01 | 0.66  | 2.56E-01 |
| NFIX     | 0.21 | 4.15E-01 | 0.99  | 1.62E-01 | 0.98  | 1.62E-01 |
| HMGXB3   | 0.21 | 4.15E-01 | 0.01  | 4.98E-01 | -0.66 | 7.47E-01 |
| SRRM5    | 0.21 | 4.15E-01 | -0.78 | 7.83E-01 | -0.49 | 6.88E-01 |
| C13orf45 | 0.21 | 4.16E-01 | 1.31  | 9.56E-02 | -0.89 | 8.13E-01 |
| SERPINE1 | 0.21 | 4.16E-01 | 1.06  | 1.44E-01 | -0.44 | 6.70E-01 |
| SERPINB9 | 0.21 | 4.16E-01 | 0.27  | 3.92E-01 | -1.71 | 9.56E-01 |

|           |      |          |       |          |       |          |
|-----------|------|----------|-------|----------|-------|----------|
| TEC       | 0.21 | 4.16E-01 | -0.20 | 5.79E-01 | -0.44 | 6.70E-01 |
| KIAA0226L | 0.21 | 4.16E-01 | -0.67 | 7.48E-01 | 0.63  | 2.65E-01 |
| NDUFS4    | 0.21 | 4.16E-01 | -1.14 | 8.72E-01 | 0.44  | 3.29E-01 |
| GUCA2A    | 0.21 | 4.16E-01 | -0.89 | 8.13E-01 | 0.43  | 3.33E-01 |
| VASP      | 0.21 | 4.16E-01 | -0.73 | 7.66E-01 | 1.06  | 1.44E-01 |
| NGRN      | 0.21 | 4.16E-01 | -0.28 | 6.12E-01 | -0.78 | 7.84E-01 |
| YES1      | 0.21 | 4.16E-01 | 1.03  | 1.50E-01 | -0.88 | 8.11E-01 |
| LRIG2     | 0.21 | 4.16E-01 | -0.31 | 6.20E-01 | 0.85  | 1.96E-01 |
| MTCH1     | 0.21 | 4.16E-01 | -0.43 | 6.65E-01 | -0.07 | 5.29E-01 |
| NUDT19    | 0.21 | 4.16E-01 | 1.07  | 1.43E-01 | -1.22 | 8.89E-01 |
| SCN3B     | 0.21 | 4.16E-01 | -0.17 | 5.69E-01 | 0.86  | 1.95E-01 |
| GABRG1    | 0.21 | 4.16E-01 | 0.42  | 3.36E-01 | -0.67 | 7.49E-01 |
| ALG12     | 0.21 | 4.16E-01 | 1.27  | 1.02E-01 | -1.40 | 9.20E-01 |
| ARMC1     | 0.21 | 4.16E-01 | -0.20 | 5.80E-01 | -0.12 | 5.48E-01 |
| SETD1A    | 0.21 | 4.16E-01 | 0.72  | 2.35E-01 | -0.10 | 5.41E-01 |
| CETN1     | 0.21 | 4.16E-01 | -0.11 | 5.45E-01 | -0.23 | 5.90E-01 |
| ENTHD2    | 0.21 | 4.17E-01 | -1.72 | 9.57E-01 | 0.46  | 3.24E-01 |
| CALCOCO2  | 0.21 | 4.17E-01 | -0.57 | 7.15E-01 | -0.08 | 5.33E-01 |
| NLRP13    | 0.21 | 4.17E-01 | -0.58 | 7.20E-01 | 1.22  | 1.12E-01 |
| DHX32     | 0.21 | 4.17E-01 | 0.60  | 2.73E-01 | -0.51 | 6.94E-01 |
| SCO1      | 0.21 | 4.17E-01 | 0.54  | 2.94E-01 | -1.24 | 8.92E-01 |
| NISCH     | 0.21 | 4.17E-01 | -0.79 | 7.86E-01 | 0.93  | 1.75E-01 |
| RLBP1     | 0.21 | 4.17E-01 | 1.61  | 5.39E-02 | -0.13 | 5.51E-01 |
| LRRC27    | 0.21 | 4.17E-01 | 0.49  | 3.13E-01 | 0.14  | 4.45E-01 |
| MAB21L3   | 0.21 | 4.17E-01 | -0.13 | 5.51E-01 | -0.44 | 6.69E-01 |
| HRSP12    | 0.21 | 4.17E-01 | 0.56  | 2.88E-01 | -0.94 | 8.27E-01 |
| AAAS      | 0.21 | 4.17E-01 | 0.24  | 4.05E-01 | -1.06 | 8.56E-01 |
| FSTL5     | 0.21 | 4.17E-01 | -1.37 | 9.15E-01 | 1.00  | 1.58E-01 |
| POP4      | 0.21 | 4.17E-01 | 0.34  | 3.68E-01 | 0.89  | 1.87E-01 |
| CST8      | 0.21 | 4.17E-01 | 0.33  | 3.72E-01 | -0.69 | 7.55E-01 |
| C3orf14   | 0.21 | 4.17E-01 | -1.43 | 9.24E-01 | 0.45  | 3.25E-01 |



|          |      |          |       |          |       |          |
|----------|------|----------|-------|----------|-------|----------|
| KRTAP4-6 | 0.21 | 4.18E-01 | -0.06 | 5.24E-01 | 0.45  | 3.27E-01 |
| TMEM218  | 0.21 | 4.18E-01 | 1.07  | 1.42E-01 | -0.38 | 6.46E-01 |
| CYTH2    | 0.21 | 4.18E-01 | -1.30 | 9.03E-01 | 1.00  | 1.58E-01 |
| CCS      | 0.21 | 4.18E-01 | 0.27  | 3.92E-01 | -1.75 | 9.60E-01 |
| ZNF891   | 0.21 | 4.18E-01 | 0.07  | 4.74E-01 | -0.73 | 7.66E-01 |
| SLC9B2   | 0.21 | 4.18E-01 | 0.14  | 4.43E-01 | -0.33 | 6.28E-01 |
| DUS2     | 0.21 | 4.18E-01 | -1.24 | 8.93E-01 | 1.30  | 9.64E-02 |
| IL18R1   | 0.21 | 4.18E-01 | 1.12  | 1.32E-01 | -2.26 | 9.88E-01 |
| ODF4     | 0.21 | 4.18E-01 | -0.39 | 6.50E-01 | 0.32  | 3.73E-01 |
| CLTB     | 0.21 | 4.18E-01 | -0.19 | 5.75E-01 | 0.48  | 3.17E-01 |
| IL5RA    | 0.21 | 4.18E-01 | -1.06 | 8.56E-01 | 0.76  | 2.22E-01 |
| SERPINB4 | 0.21 | 4.18E-01 | -2.29 | 9.89E-01 | 0.95  | 1.72E-01 |
| FASTKD2  | 0.21 | 4.18E-01 | -0.24 | 5.93E-01 | 0.87  | 1.92E-01 |
| GALNT12  | 0.21 | 4.18E-01 | 0.49  | 3.12E-01 | -1.20 | 8.86E-01 |
| SLC1A2   | 0.21 | 4.18E-01 | -1.64 | 9.50E-01 | 0.91  | 1.81E-01 |
| VASH2    | 0.21 | 4.18E-01 | -0.40 | 6.56E-01 | -0.29 | 6.13E-01 |
| MASP1    | 0.21 | 4.18E-01 | -0.12 | 5.48E-01 | 0.58  | 2.80E-01 |
| KLK2     | 0.21 | 4.18E-01 | -0.83 | 7.96E-01 | 0.30  | 3.82E-01 |
| GABPA    | 0.21 | 4.18E-01 | -0.96 | 8.32E-01 | 0.74  | 2.30E-01 |
| ZNF143   | 0.21 | 4.19E-01 | -1.11 | 8.66E-01 | 2.27  | 1.17E-02 |
| DMTF1    | 0.21 | 4.19E-01 | 0.23  | 4.10E-01 | -0.70 | 7.58E-01 |
| CACNG8   | 0.20 | 4.19E-01 | 0.23  | 4.11E-01 | 0.84  | 2.01E-01 |
| U2SURP   | 0.20 | 4.19E-01 | 1.87  | 3.08E-02 | -0.10 | 5.39E-01 |
| MB       | 0.20 | 4.19E-01 | 0.15  | 4.41E-01 | 0.21  | 4.16E-01 |
| CNOT3    | 0.20 | 4.19E-01 | -1.85 | 9.67E-01 | 0.74  | 2.29E-01 |
| GDPGP1   | 0.20 | 4.19E-01 | -0.99 | 8.40E-01 | -0.02 | 5.10E-01 |
| NMUR2    | 0.20 | 4.19E-01 | -0.98 | 8.37E-01 | 1.00  | 1.58E-01 |
| DNAAF2   | 0.20 | 4.19E-01 | -0.88 | 8.10E-01 | 0.19  | 4.23E-01 |
| TMEM186  | 0.20 | 4.19E-01 | -0.40 | 6.57E-01 | 1.29  | 9.80E-02 |
| AQP5     | 0.20 | 4.19E-01 | 0.51  | 3.04E-01 | -2.04 | 9.80E-01 |
| RYBP     | 0.20 | 4.19E-01 | 0.17  | 4.32E-01 | -1.47 | 9.30E-01 |

|           |      |          |       |          |       |          |
|-----------|------|----------|-------|----------|-------|----------|
| DIS3      | 0.20 | 4.19E-01 | -0.19 | 5.75E-01 | 0.77  | 2.22E-01 |
| DYM       | 0.20 | 4.20E-01 | -0.07 | 5.29E-01 | -0.25 | 5.99E-01 |
| GRID2IP   | 0.20 | 4.20E-01 | -1.17 | 8.79E-01 | 0.89  | 1.87E-01 |
| TRIM36    | 0.20 | 4.20E-01 | -1.21 | 8.87E-01 | 1.01  | 1.56E-01 |
| BRI3BP    | 0.20 | 4.20E-01 | -0.09 | 5.37E-01 | -0.49 | 6.87E-01 |
| ZNF672    | 0.20 | 4.20E-01 | 0.75  | 2.28E-01 | -0.47 | 6.82E-01 |
| GAS2L1    | 0.20 | 4.20E-01 | -0.25 | 5.99E-01 | -0.92 | 8.21E-01 |
| MON1B     | 0.20 | 4.20E-01 | -0.76 | 7.77E-01 | 1.23  | 1.08E-01 |
| C10orf129 | 0.20 | 4.20E-01 | 1.45  | 7.30E-02 | -0.73 | 7.67E-01 |
| AURKA     | 0.20 | 4.20E-01 | -0.37 | 6.43E-01 | 1.60  | 5.43E-02 |
| BHLHE41   | 0.20 | 4.20E-01 | -0.57 | 7.16E-01 | 0.75  | 2.28E-01 |
| KEL       | 0.20 | 4.20E-01 | 0.77  | 2.22E-01 | 0.37  | 3.55E-01 |
| STOM      | 0.20 | 4.20E-01 | -0.84 | 7.99E-01 | 0.41  | 3.40E-01 |
| RAB12     | 0.20 | 4.20E-01 | 0.88  | 1.89E-01 | 2.78  | 2.70E-03 |
| FOXP2     | 0.20 | 4.20E-01 | -0.35 | 6.38E-01 | 0.91  | 1.82E-01 |
| OR2D2     | 0.20 | 4.20E-01 | 0.44  | 3.29E-01 | -0.68 | 7.51E-01 |
| AZI2      | 0.20 | 4.20E-01 | -0.96 | 8.32E-01 | 1.75  | 4.02E-02 |
| INSM2     | 0.20 | 4.20E-01 | 0.53  | 3.00E-01 | -1.39 | 9.17E-01 |
| EVX2      | 0.20 | 4.20E-01 | -1.82 | 9.66E-01 | 0.70  | 2.43E-01 |
| CCDC137   | 0.20 | 4.21E-01 | 0.58  | 2.82E-01 | -1.08 | 8.61E-01 |
| HIPK4     | 0.20 | 4.21E-01 | 1.81  | 3.55E-02 | 1.39  | 8.22E-02 |
| ACAT1     | 0.20 | 4.21E-01 | -0.61 | 7.30E-01 | -0.37 | 6.43E-01 |
| LSM11     | 0.20 | 4.21E-01 | -0.13 | 5.53E-01 | -0.81 | 7.91E-01 |
| UNC45A    | 0.20 | 4.21E-01 | 1.11  | 1.33E-01 | -0.67 | 7.48E-01 |
| CRIP1     | 0.20 | 4.21E-01 | -1.41 | 9.21E-01 | 0.62  | 2.68E-01 |
| COTL1     | 0.20 | 4.21E-01 | 0.13  | 4.48E-01 | -0.05 | 5.20E-01 |
| TSPO2     | 0.20 | 4.21E-01 | 0.28  | 3.91E-01 | 0.30  | 3.81E-01 |
| REG1B     | 0.20 | 4.21E-01 | 0.37  | 3.54E-01 | -0.37 | 6.43E-01 |
| ZMAT3     | 0.20 | 4.21E-01 | -0.23 | 5.90E-01 | -0.40 | 6.56E-01 |
| LETM1     | 0.20 | 4.21E-01 | 0.97  | 1.67E-01 | -0.89 | 8.14E-01 |
| CHML      | 0.20 | 4.22E-01 | -0.38 | 6.47E-01 | -0.49 | 6.87E-01 |

|          |      |          |       |          |       |          |
|----------|------|----------|-------|----------|-------|----------|
| NAA15    | 0.20 | 4.22E-01 | 0.90  | 1.83E-01 | -1.90 | 9.72E-01 |
| MAP3K4   | 0.20 | 4.22E-01 | -0.44 | 6.70E-01 | -0.33 | 6.29E-01 |
| SGMS1    | 0.20 | 4.22E-01 | -2.69 | 9.96E-01 | 1.25  | 1.06E-01 |
| NUDT16   | 0.20 | 4.22E-01 | 1.26  | 1.03E-01 | 0.70  | 2.43E-01 |
| DGAT1    | 0.20 | 4.22E-01 | -0.39 | 6.50E-01 | 0.14  | 4.46E-01 |
| RFPL1    | 0.20 | 4.22E-01 | -1.00 | 8.40E-01 | 0.61  | 2.70E-01 |
| C1QTNF8  | 0.20 | 4.22E-01 | 0.34  | 3.68E-01 | 0.06  | 4.76E-01 |
| GGNBP2   | 0.20 | 4.22E-01 | -0.31 | 6.23E-01 | -0.37 | 6.46E-01 |
| ANAPC4   | 0.20 | 4.22E-01 | 0.46  | 3.23E-01 | -1.41 | 9.20E-01 |
| CDHR3    | 0.20 | 4.22E-01 | -0.36 | 6.41E-01 | -0.35 | 6.36E-01 |
| TMEM245  | 0.20 | 4.22E-01 | 0.69  | 2.47E-01 | -1.44 | 9.25E-01 |
| S100A7L2 | 0.20 | 4.22E-01 | -1.24 | 8.92E-01 | 1.54  | 6.22E-02 |
| DFFA     | 0.20 | 4.22E-01 | 0.32  | 3.75E-01 | 0.18  | 4.30E-01 |
| HSPA5    | 0.20 | 4.22E-01 | -0.26 | 6.01E-01 | -0.64 | 7.39E-01 |
| TLR10    | 0.20 | 4.22E-01 | 0.71  | 2.39E-01 | -1.12 | 8.68E-01 |
| MRPL45   | 0.20 | 4.22E-01 | -0.92 | 8.22E-01 | 0.50  | 3.07E-01 |
| UBE2G1   | 0.20 | 4.22E-01 | -0.15 | 5.61E-01 | -0.27 | 6.05E-01 |
| ZNF747   | 0.20 | 4.22E-01 | 1.25  | 1.05E-01 | -1.37 | 9.15E-01 |
| ZFAND4   | 0.20 | 4.22E-01 | -0.12 | 5.47E-01 | -0.35 | 6.36E-01 |
| WDR86    | 0.20 | 4.23E-01 | 0.25  | 4.02E-01 | 2.05  | 2.02E-02 |
| DDX10    | 0.20 | 4.23E-01 | 2.32  | 1.03E-02 | 1.74  | 4.05E-02 |
| CRISP3   | 0.19 | 4.23E-01 | -0.94 | 8.28E-01 | 0.45  | 3.27E-01 |
| GTF3A    | 0.19 | 4.23E-01 | 1.63  | 5.19E-02 | -0.61 | 7.29E-01 |
| FBRS     | 0.19 | 4.23E-01 | 0.02  | 4.93E-01 | -0.35 | 6.37E-01 |
| CXXC5    | 0.19 | 4.23E-01 | 0.74  | 2.29E-01 | 0.34  | 3.68E-01 |
| ZBED3    | 0.19 | 4.23E-01 | 0.09  | 4.64E-01 | -0.31 | 6.21E-01 |
| PAFAH1B2 | 0.19 | 4.23E-01 | -0.97 | 8.35E-01 | -0.10 | 5.41E-01 |
| TUBA3D   | 0.19 | 4.23E-01 | -0.93 | 8.23E-01 | 0.92  | 1.78E-01 |
| ANKS6    | 0.19 | 4.23E-01 | -0.11 | 5.43E-01 | -0.86 | 8.04E-01 |
| RNF213   | 0.19 | 4.23E-01 | -0.20 | 5.77E-01 | -1.02 | 8.47E-01 |
| PPP2R2A  | 0.19 | 4.23E-01 | -0.67 | 7.48E-01 | 0.58  | 2.82E-01 |

|                |      |          |       |          |       |          |
|----------------|------|----------|-------|----------|-------|----------|
| BLOC1S5-TXNDC5 | 0.19 | 4.23E-01 | 2.23  | 1.29E-02 | -0.43 | 6.67E-01 |
| KCNE3          | 0.19 | 4.23E-01 | 0.04  | 4.82E-01 | -0.63 | 7.36E-01 |
| HS3ST2         | 0.19 | 4.23E-01 | 1.66  | 4.84E-02 | 0.01  | 4.98E-01 |
| ASB6           | 0.19 | 4.23E-01 | 0.36  | 3.58E-01 | 0.73  | 2.33E-01 |
| SMIM20         | 0.19 | 4.23E-01 | -0.89 | 8.13E-01 | -0.42 | 6.62E-01 |
| ELP5           | 0.19 | 4.23E-01 | -0.44 | 6.69E-01 | -0.19 | 5.75E-01 |
| SBK2           | 0.19 | 4.23E-01 | -1.08 | 8.61E-01 | 1.07  | 1.41E-01 |
| SLC22A13       | 0.19 | 4.23E-01 | -0.48 | 6.83E-01 | -0.21 | 5.82E-01 |
| SCGB1D2        | 0.19 | 4.23E-01 | 0.18  | 4.30E-01 | -0.94 | 8.28E-01 |
| CNOT11         | 0.19 | 4.24E-01 | -0.79 | 7.85E-01 | 1.16  | 1.23E-01 |
| SLC5A11        | 0.19 | 4.24E-01 | -0.68 | 7.52E-01 | 0.34  | 3.66E-01 |
| IRAK1BP1       | 0.19 | 4.24E-01 | 0.95  | 1.71E-01 | -1.06 | 8.56E-01 |
| TPD52          | 0.19 | 4.24E-01 | -0.71 | 7.60E-01 | 0.06  | 4.75E-01 |
| TMEM185B       | 0.19 | 4.24E-01 | 0.33  | 3.72E-01 | 0.33  | 3.70E-01 |
| C22orf34       | 0.19 | 4.24E-01 | -0.98 | 8.36E-01 | 0.90  | 1.84E-01 |
| ZNF236         | 0.19 | 4.24E-01 | 0.10  | 4.62E-01 | 0.31  | 3.77E-01 |
| NUDT12         | 0.19 | 4.24E-01 | 0.33  | 3.73E-01 | -0.70 | 7.59E-01 |
| AQP1           | 0.19 | 4.24E-01 | 1.04  | 1.49E-01 | -0.57 | 7.16E-01 |
| ATXN7L3        | 0.19 | 4.24E-01 | 0.44  | 3.30E-01 | -1.47 | 9.29E-01 |
| RBM17          | 0.19 | 4.24E-01 | 0.13  | 4.49E-01 | -0.24 | 5.96E-01 |
| FAM135B        | 0.19 | 4.24E-01 | -0.84 | 7.99E-01 | 1.05  | 1.48E-01 |
| SGCD           | 0.19 | 4.24E-01 | -1.07 | 8.57E-01 | 1.11  | 1.33E-01 |
| RECQL          | 0.19 | 4.24E-01 | -0.76 | 7.78E-01 | -0.14 | 5.55E-01 |
| AMOTL1         | 0.19 | 4.24E-01 | 1.19  | 1.17E-01 | -2.10 | 9.82E-01 |
| ITFG3          | 0.19 | 4.24E-01 | -0.71 | 7.62E-01 | 0.19  | 4.25E-01 |
| SORBS3         | 0.19 | 4.24E-01 | 0.42  | 3.37E-01 | -0.41 | 6.59E-01 |
| PGA4           | 0.19 | 4.24E-01 | 0.54  | 2.95E-01 | -0.94 | 8.28E-01 |
| PGA5           | 0.19 | 4.24E-01 | 0.54  | 2.95E-01 | -0.94 | 8.28E-01 |
| MYBL2          | 0.19 | 4.24E-01 | 1.80  | 3.60E-02 | -0.29 | 6.15E-01 |
| HSPG2          | 0.19 | 4.24E-01 | -1.58 | 9.43E-01 | 1.71  | 4.39E-02 |
| FAHD2B         | 0.19 | 4.25E-01 | -0.42 | 6.63E-01 | 0.01  | 4.94E-01 |

|          |      |          |       |          |       |          |
|----------|------|----------|-------|----------|-------|----------|
| NES      | 0.19 | 4.25E-01 | -0.20 | 5.79E-01 | 1.66  | 4.81E-02 |
| METTL8   | 0.19 | 4.25E-01 | -1.22 | 8.89E-01 | 0.18  | 4.29E-01 |
| TCL1A    | 0.19 | 4.25E-01 | 0.47  | 3.19E-01 | -0.87 | 8.07E-01 |
| PDE1A    | 0.19 | 4.25E-01 | 0.08  | 4.69E-01 | -1.14 | 8.72E-01 |
| GADD45B  | 0.19 | 4.25E-01 | 0.21  | 4.17E-01 | -0.21 | 5.84E-01 |
| RGS7     | 0.19 | 4.25E-01 | 0.93  | 1.76E-01 | -1.25 | 8.94E-01 |
| EAPP     | 0.19 | 4.25E-01 | 0.85  | 1.97E-01 | -1.27 | 8.98E-01 |
| TUBGCP5  | 0.19 | 4.25E-01 | -0.22 | 5.85E-01 | -0.02 | 5.07E-01 |
| DAOA     | 0.19 | 4.25E-01 | 0.67  | 2.52E-01 | 0.82  | 2.05E-01 |
| MNS1     | 0.19 | 4.25E-01 | 0.38  | 3.50E-01 | 0.46  | 3.24E-01 |
| ANKRD27  | 0.19 | 4.25E-01 | 0.16  | 4.35E-01 | 1.23  | 1.09E-01 |
| RHOG     | 0.19 | 4.26E-01 | -0.75 | 7.74E-01 | -0.38 | 6.47E-01 |
| TMEM101  | 0.19 | 4.26E-01 | 1.15  | 1.25E-01 | -1.22 | 8.88E-01 |
| T        | 0.19 | 4.26E-01 | -0.39 | 6.53E-01 | 0.23  | 4.10E-01 |
| NUPR1L   | 0.19 | 4.26E-01 | 0.79  | 2.14E-01 | -2.46 | 9.93E-01 |
| C7orf65  | 0.19 | 4.26E-01 | -0.44 | 6.69E-01 | 1.37  | 8.46E-02 |
| PTRH1    | 0.19 | 4.26E-01 | 1.09  | 1.38E-01 | -0.87 | 8.08E-01 |
| CDR2     | 0.19 | 4.26E-01 | 0.52  | 3.01E-01 | -1.15 | 8.76E-01 |
| PPP6R3   | 0.19 | 4.26E-01 | -0.24 | 5.96E-01 | -0.21 | 5.82E-01 |
| C1QTNF6  | 0.19 | 4.26E-01 | 0.14  | 4.43E-01 | -0.06 | 5.25E-01 |
| CYP2S1   | 0.19 | 4.26E-01 | -0.40 | 6.55E-01 | 2.09  | 1.82E-02 |
| KRTAP9-2 | 0.19 | 4.26E-01 | 0.64  | 2.61E-01 | -1.96 | 9.75E-01 |
| ERC2     | 0.19 | 4.26E-01 | 2.30  | 1.08E-02 | 1.02  | 1.54E-01 |
| ZNF655   | 0.19 | 4.26E-01 | -0.56 | 7.11E-01 | 0.28  | 3.90E-01 |
| CLIP4    | 0.19 | 4.26E-01 | 1.00  | 1.60E-01 | 1.37  | 8.50E-02 |
| GPR39    | 0.19 | 4.26E-01 | -1.53 | 9.37E-01 | 0.34  | 3.66E-01 |
| LRPAP1   | 0.19 | 4.26E-01 | -0.42 | 6.62E-01 | 0.98  | 1.63E-01 |
| SENP3    | 0.19 | 4.26E-01 | 1.72  | 4.28E-02 | -0.68 | 7.50E-01 |
| ELFN1    | 0.19 | 4.26E-01 | 1.31  | 9.54E-02 | 0.28  | 3.88E-01 |
| DEFB114  | 0.19 | 4.27E-01 | -0.55 | 7.09E-01 | -0.12 | 5.48E-01 |
| CD80     | 0.18 | 4.27E-01 | 0.57  | 2.84E-01 | 0.21  | 4.15E-01 |

|          |      |          |       |          |       |          |
|----------|------|----------|-------|----------|-------|----------|
| C19orf35 | 0.18 | 4.27E-01 | -0.70 | 7.57E-01 | 0.38  | 3.50E-01 |
| PDGFA    | 0.18 | 4.27E-01 | 0.04  | 4.83E-01 | 1.26  | 1.04E-01 |
| TSNAXIP1 | 0.18 | 4.27E-01 | -0.87 | 8.07E-01 | 1.53  | 6.35E-02 |
| ZNF836   | 0.18 | 4.27E-01 | -1.63 | 9.49E-01 | 1.30  | 9.70E-02 |
| PLS1     | 0.18 | 4.27E-01 | -0.25 | 5.98E-01 | 0.04  | 4.84E-01 |
| PPP1R32  | 0.18 | 4.27E-01 | -0.21 | 5.84E-01 | 0.17  | 4.33E-01 |
| CIB4     | 0.18 | 4.27E-01 | 1.42  | 7.74E-02 | 0.01  | 4.96E-01 |
| HIST1H4J | 0.18 | 4.27E-01 | 1.08  | 1.40E-01 | -0.49 | 6.89E-01 |
| ISM2     | 0.18 | 4.27E-01 | -1.25 | 8.95E-01 | 0.19  | 4.23E-01 |
| NFE2     | 0.18 | 4.27E-01 | 0.59  | 2.78E-01 | -1.94 | 9.74E-01 |
| TRANK1   | 0.18 | 4.27E-01 | 0.69  | 2.45E-01 | -0.95 | 8.30E-01 |
| LARP4B   | 0.18 | 4.27E-01 | -0.39 | 6.52E-01 | 0.19  | 4.25E-01 |
| BROX     | 0.18 | 4.28E-01 | -0.21 | 5.83E-01 | -0.72 | 7.63E-01 |
| GSE1     | 0.18 | 4.28E-01 | 0.53  | 2.97E-01 | -0.19 | 5.77E-01 |
| GTF2H1   | 0.18 | 4.28E-01 | 0.05  | 4.81E-01 | 0.16  | 4.37E-01 |
| CST1     | 0.18 | 4.28E-01 | 0.35  | 3.63E-01 | -0.89 | 8.14E-01 |
| SUN5     | 0.18 | 4.28E-01 | 0.38  | 3.51E-01 | -0.67 | 7.48E-01 |
| EDDM3B   | 0.18 | 4.28E-01 | 0.99  | 1.60E-01 | -1.64 | 9.50E-01 |
| ABCD3    | 0.18 | 4.28E-01 | 0.73  | 2.34E-01 | -0.31 | 6.24E-01 |
| ANKAR    | 0.18 | 4.28E-01 | 0.11  | 4.58E-01 | 0.51  | 3.05E-01 |
| R3HDM2   | 0.18 | 4.28E-01 | -1.31 | 9.06E-01 | 0.91  | 1.80E-01 |
| ODAM     | 0.18 | 4.28E-01 | 0.33  | 3.70E-01 | -0.51 | 6.97E-01 |
| GTF3C3   | 0.18 | 4.28E-01 | 1.23  | 1.09E-01 | -0.71 | 7.60E-01 |
| API5     | 0.18 | 4.28E-01 | 1.44  | 7.52E-02 | 0.62  | 2.68E-01 |
| RPS27A   | 0.18 | 4.28E-01 | 0.18  | 4.29E-01 | 0.25  | 4.01E-01 |
| CD72     | 0.18 | 4.28E-01 | -0.31 | 6.23E-01 | 0.22  | 4.12E-01 |
| COL17A1  | 0.18 | 4.29E-01 | 1.15  | 1.25E-01 | -0.06 | 5.25E-01 |
| SNX6     | 0.18 | 4.29E-01 | 0.71  | 2.38E-01 | -1.18 | 8.81E-01 |
| CABLES1  | 0.18 | 4.29E-01 | -1.81 | 9.64E-01 | 1.41  | 7.86E-02 |
| ANXA6    | 0.18 | 4.29E-01 | 1.07  | 1.42E-01 | -1.22 | 8.88E-01 |
| WDR77    | 0.18 | 4.29E-01 | 0.09  | 4.63E-01 | 1.39  | 8.29E-02 |

|           |      |          |       |          |       |          |
|-----------|------|----------|-------|----------|-------|----------|
| UBE3B     | 0.18 | 4.29E-01 | 0.34  | 3.65E-01 | -1.39 | 9.17E-01 |
| INPP5K    | 0.18 | 4.29E-01 | 2.16  | 1.53E-02 | -0.71 | 7.60E-01 |
| NME3      | 0.18 | 4.29E-01 | -0.99 | 8.39E-01 | 0.40  | 3.45E-01 |
| GSTM3     | 0.18 | 4.29E-01 | -0.32 | 6.24E-01 | -0.64 | 7.40E-01 |
| OR1S2     | 0.18 | 4.29E-01 | -2.03 | 9.79E-01 | 1.30  | 9.64E-02 |
| GLTPD1    | 0.18 | 4.29E-01 | 0.27  | 3.94E-01 | -0.08 | 5.33E-01 |
| KBTBD3    | 0.18 | 4.29E-01 | 0.35  | 3.62E-01 | -0.54 | 7.04E-01 |
| CAMK2A    | 0.18 | 4.29E-01 | 0.22  | 4.12E-01 | -1.19 | 8.82E-01 |
| HMGA2     | 0.18 | 4.29E-01 | 1.65  | 4.99E-02 | 0.47  | 3.19E-01 |
| C8A       | 0.18 | 4.30E-01 | -0.21 | 5.82E-01 | 0.26  | 3.98E-01 |
| EFCAB3    | 0.18 | 4.30E-01 | -0.14 | 5.58E-01 | 1.18  | 1.20E-01 |
| TFCP2L1   | 0.18 | 4.30E-01 | 0.92  | 1.78E-01 | 0.71  | 2.38E-01 |
| BRDT      | 0.18 | 4.30E-01 | 0.63  | 2.63E-01 | -1.06 | 8.55E-01 |
| CACNA1E   | 0.18 | 4.30E-01 | 0.02  | 4.94E-01 | -0.49 | 6.89E-01 |
| KRT32     | 0.18 | 4.30E-01 | -0.27 | 6.08E-01 | -0.75 | 7.74E-01 |
| PSKH1     | 0.18 | 4.30E-01 | -0.31 | 6.22E-01 | 1.61  | 5.39E-02 |
| GLUL      | 0.18 | 4.30E-01 | 0.02  | 4.93E-01 | -0.77 | 7.80E-01 |
| VGLL2     | 0.18 | 4.30E-01 | -0.65 | 7.43E-01 | -0.02 | 5.10E-01 |
| CAV1      | 0.18 | 4.30E-01 | 0.97  | 1.67E-01 | -1.19 | 8.82E-01 |
| CYP2U1    | 0.18 | 4.30E-01 | 0.79  | 2.15E-01 | -0.32 | 6.24E-01 |
| C20orf196 | 0.18 | 4.30E-01 | 1.38  | 8.41E-02 | 1.47  | 7.07E-02 |
| PPRC1     | 0.18 | 4.30E-01 | -0.66 | 7.45E-01 | 1.70  | 4.45E-02 |
| GCK       | 0.18 | 4.30E-01 | 0.24  | 4.04E-01 | 0.11  | 4.56E-01 |
| CMTM2     | 0.18 | 4.30E-01 | -1.20 | 8.85E-01 | 1.09  | 1.37E-01 |
| AFTPH     | 0.18 | 4.30E-01 | 0.60  | 2.76E-01 | 2.12  | 1.69E-02 |
| TP53RK    | 0.18 | 4.30E-01 | 0.38  | 3.51E-01 | 0.01  | 4.97E-01 |
| AOC2      | 0.18 | 4.30E-01 | 0.13  | 4.50E-01 | -0.76 | 7.76E-01 |
| UHRF1BP1  | 0.18 | 4.30E-01 | -1.07 | 8.58E-01 | 1.84  | 3.26E-02 |
| PABPN1L   | 0.18 | 4.31E-01 | 0.24  | 4.05E-01 | -1.04 | 8.51E-01 |
| TTC14     | 0.17 | 4.31E-01 | 0.12  | 4.53E-01 | 1.80  | 3.60E-02 |
| ZNF410    | 0.17 | 4.31E-01 | -0.35 | 6.38E-01 | -0.58 | 7.18E-01 |

|          |      |          |       |          |       |          |
|----------|------|----------|-------|----------|-------|----------|
| CAPN12   | 0.17 | 4.31E-01 | 0.35  | 3.64E-01 | -0.78 | 7.82E-01 |
| PRDM12   | 0.17 | 4.31E-01 | 0.31  | 3.77E-01 | -0.99 | 8.39E-01 |
| IQCA1    | 0.17 | 4.31E-01 | 0.05  | 4.81E-01 | 0.07  | 4.70E-01 |
| GPR162   | 0.17 | 4.31E-01 | -0.03 | 5.10E-01 | 0.58  | 2.83E-01 |
| HOXA10   | 0.17 | 4.31E-01 | 0.96  | 1.70E-01 | 0.10  | 4.60E-01 |
| ZNF579   | 0.17 | 4.31E-01 | 0.19  | 4.25E-01 | 0.98  | 1.63E-01 |
| KLHL2    | 0.17 | 4.32E-01 | 1.03  | 1.53E-01 | -1.05 | 8.52E-01 |
| MOB1A    | 0.17 | 4.32E-01 | -1.24 | 8.92E-01 | 0.41  | 3.41E-01 |
| IWS1     | 0.17 | 4.32E-01 | 0.16  | 4.35E-01 | 0.46  | 3.23E-01 |
| KRT4     | 0.17 | 4.32E-01 | 0.11  | 4.54E-01 | -1.56 | 9.41E-01 |
| C10orf71 | 0.17 | 4.32E-01 | 0.37  | 3.57E-01 | -0.88 | 8.11E-01 |
| SLC45A4  | 0.17 | 4.32E-01 | 0.83  | 2.03E-01 | -1.24 | 8.93E-01 |
| LRRC8E   | 0.17 | 4.32E-01 | -0.84 | 7.99E-01 | 0.27  | 3.95E-01 |
| MTUS1    | 0.17 | 4.32E-01 | -1.11 | 8.67E-01 | 0.26  | 3.97E-01 |
| FBXO7    | 0.17 | 4.32E-01 | 0.51  | 3.07E-01 | -0.90 | 8.17E-01 |
| DDX17    | 0.17 | 4.32E-01 | 0.95  | 1.72E-01 | -0.47 | 6.82E-01 |
| ABCG5    | 0.17 | 4.32E-01 | 0.72  | 2.37E-01 | -1.16 | 8.77E-01 |
| PHF20    | 0.17 | 4.32E-01 | -0.45 | 6.74E-01 | -0.44 | 6.71E-01 |
| LCE6A    | 0.17 | 4.32E-01 | -0.62 | 7.34E-01 | -0.01 | 5.04E-01 |
| LCP2     | 0.17 | 4.33E-01 | -0.62 | 7.33E-01 | -0.13 | 5.51E-01 |
| RGSS5    | 0.17 | 4.33E-01 | -1.44 | 9.25E-01 | 0.55  | 2.92E-01 |
| PLXNA1   | 0.17 | 4.33E-01 | -0.14 | 5.56E-01 | -0.51 | 6.94E-01 |
| FAM208A  | 0.17 | 4.33E-01 | 0.21  | 4.15E-01 | 0.63  | 2.65E-01 |
| TMPO     | 0.17 | 4.33E-01 | 0.96  | 1.70E-01 | -0.52 | 6.98E-01 |
| SPACA1   | 0.17 | 4.33E-01 | -0.29 | 6.15E-01 | -0.26 | 6.02E-01 |
| ZNF699   | 0.17 | 4.33E-01 | -0.37 | 6.46E-01 | -0.24 | 5.94E-01 |
| WDR81    | 0.17 | 4.33E-01 | -0.91 | 8.19E-01 | 0.18  | 4.28E-01 |
| CTBS     | 0.17 | 4.33E-01 | 0.11  | 4.58E-01 | 0.35  | 3.64E-01 |
| TTLL7    | 0.17 | 4.33E-01 | 0.71  | 2.37E-01 | 0.92  | 1.78E-01 |
| BCL7C    | 0.17 | 4.33E-01 | 0.68  | 2.49E-01 | -0.64 | 7.41E-01 |
| MKKS     | 0.17 | 4.33E-01 | -0.93 | 8.23E-01 | 0.16  | 4.38E-01 |



|          |      |          |       |          |       |          |
|----------|------|----------|-------|----------|-------|----------|
| KIF6     | 0.17 | 4.33E-01 | 0.58  | 2.82E-01 | -1.26 | 8.96E-01 |
| WISP3    | 0.17 | 4.33E-01 | 0.52  | 3.02E-01 | 0.29  | 3.84E-01 |
| TTC17    | 0.17 | 4.33E-01 | 1.07  | 1.41E-01 | 0.42  | 3.36E-01 |
| CHFR     | 0.17 | 4.33E-01 | 0.89  | 1.88E-01 | 0.33  | 3.72E-01 |
| CNTNAP2  | 0.17 | 4.33E-01 | 0.76  | 2.23E-01 | 2.67  | 3.83E-03 |
| PLSCR5   | 0.17 | 4.33E-01 | 0.57  | 2.83E-01 | -1.02 | 8.47E-01 |
| SLC25A30 | 0.17 | 4.33E-01 | -0.20 | 5.79E-01 | 0.41  | 3.41E-01 |
| GUCY2D   | 0.17 | 4.33E-01 | 0.19  | 4.23E-01 | -0.64 | 7.38E-01 |
| C8orf82  | 0.17 | 4.33E-01 | 0.01  | 4.95E-01 | -0.48 | 6.84E-01 |
| VEGFC    | 0.17 | 4.33E-01 | 0.30  | 3.83E-01 | -0.56 | 7.11E-01 |
| ZPBP2    | 0.17 | 4.33E-01 | -1.33 | 9.09E-01 | 0.54  | 2.95E-01 |
| COL28A1  | 0.17 | 4.34E-01 | -0.33 | 6.31E-01 | 1.35  | 8.84E-02 |
| TTC7B    | 0.17 | 4.34E-01 | -0.82 | 7.94E-01 | 0.80  | 2.13E-01 |
| C7orf43  | 0.17 | 4.34E-01 | 0.36  | 3.58E-01 | 1.03  | 1.50E-01 |
| SPTBN2   | 0.17 | 4.34E-01 | 1.12  | 1.30E-01 | -1.40 | 9.19E-01 |
| ZNF502   | 0.17 | 4.34E-01 | 0.07  | 4.72E-01 | 0.75  | 2.28E-01 |
| TMPRSS12 | 0.17 | 4.34E-01 | -0.19 | 5.76E-01 | 0.46  | 3.23E-01 |
| TLCD2    | 0.17 | 4.34E-01 | -0.67 | 7.49E-01 | 0.17  | 4.32E-01 |
| C1orf86  | 0.17 | 4.34E-01 | 0.33  | 3.70E-01 | -1.26 | 8.97E-01 |
| H2AFY2   | 0.17 | 4.34E-01 | 0.33  | 3.69E-01 | 0.87  | 1.93E-01 |
| NAGK     | 0.17 | 4.34E-01 | 0.81  | 2.10E-01 | -1.74 | 9.59E-01 |
| ZNF662   | 0.17 | 4.34E-01 | 0.23  | 4.10E-01 | 1.03  | 1.51E-01 |
| SPATC1L  | 0.17 | 4.34E-01 | -0.30 | 6.17E-01 | 0.56  | 2.87E-01 |
| GATA4    | 0.17 | 4.34E-01 | -1.11 | 8.66E-01 | 2.45  | 7.22E-03 |
| COL18A1  | 0.16 | 4.35E-01 | 0.46  | 3.23E-01 | -0.09 | 5.37E-01 |
| CDR2L    | 0.16 | 4.35E-01 | -0.48 | 6.84E-01 | -0.69 | 7.55E-01 |
| FRMD4A   | 0.16 | 4.35E-01 | -0.01 | 5.04E-01 | 0.47  | 3.19E-01 |
| SHISA7   | 0.16 | 4.35E-01 | 0.32  | 3.74E-01 | -1.59 | 9.44E-01 |
| PTGR2    | 0.16 | 4.35E-01 | -0.13 | 5.53E-01 | -0.57 | 7.14E-01 |
| ASB13    | 0.16 | 4.35E-01 | 0.76  | 2.24E-01 | 1.39  | 8.30E-02 |
| IBA57    | 0.16 | 4.35E-01 | 0.58  | 2.80E-01 | -1.10 | 8.64E-01 |

|          |      |          |       |          |       |          |
|----------|------|----------|-------|----------|-------|----------|
| TLE2     | 0.16 | 4.35E-01 | 0.51  | 3.04E-01 | -0.77 | 7.80E-01 |
| LMAN2L   | 0.16 | 4.35E-01 | 1.71  | 4.35E-02 | -0.24 | 5.96E-01 |
| SNX21    | 0.16 | 4.35E-01 | 0.11  | 4.56E-01 | -0.05 | 5.19E-01 |
| WDR78    | 0.16 | 4.35E-01 | -0.50 | 6.91E-01 | 0.46  | 3.24E-01 |
| LSR      | 0.16 | 4.35E-01 | 1.07  | 1.43E-01 | -1.32 | 9.06E-01 |
| GET4     | 0.16 | 4.35E-01 | 0.33  | 3.72E-01 | -0.22 | 5.86E-01 |
| RPL32    | 0.16 | 4.35E-01 | 0.94  | 1.73E-01 | -0.98 | 8.35E-01 |
| HS3ST6   | 0.16 | 4.35E-01 | -1.57 | 9.42E-01 | 1.17  | 1.21E-01 |
| FMO1     | 0.16 | 4.35E-01 | -0.36 | 6.41E-01 | 0.87  | 1.91E-01 |
| DCTN2    | 0.16 | 4.35E-01 | 0.62  | 2.67E-01 | -1.74 | 9.59E-01 |
| SETMAR   | 0.16 | 4.35E-01 | 0.61  | 2.69E-01 | 0.51  | 3.06E-01 |
| REEP5    | 0.16 | 4.36E-01 | -1.04 | 8.52E-01 | 1.73  | 4.21E-02 |
| OR4K13   | 0.16 | 4.36E-01 | 0.29  | 3.86E-01 | 0.38  | 3.53E-01 |
| ZNF689   | 0.16 | 4.36E-01 | 1.54  | 6.19E-02 | -0.66 | 7.45E-01 |
| CSTB     | 0.16 | 4.36E-01 | -0.44 | 6.71E-01 | -0.18 | 5.73E-01 |
| TP53I11  | 0.16 | 4.36E-01 | -1.13 | 8.70E-01 | 1.16  | 1.23E-01 |
| KRAS     | 0.16 | 4.36E-01 | 1.81  | 3.51E-02 | 0.51  | 3.04E-01 |
| NMU      | 0.16 | 4.36E-01 | -0.48 | 6.86E-01 | 0.48  | 3.17E-01 |
| DCPS     | 0.16 | 4.36E-01 | -0.72 | 7.65E-01 | -0.38 | 6.49E-01 |
| PRG2     | 0.16 | 4.36E-01 | 0.45  | 3.28E-01 | -0.21 | 5.82E-01 |
| LRRC3DN  | 0.16 | 4.36E-01 | 0.85  | 1.97E-01 | -1.31 | 9.06E-01 |
| DAXX     | 0.16 | 4.36E-01 | -0.10 | 5.39E-01 | -0.15 | 5.58E-01 |
| GPT      | 0.16 | 4.36E-01 | 0.21  | 4.16E-01 | -0.79 | 7.85E-01 |
| ZC3HAV1L | 0.16 | 4.36E-01 | -1.01 | 8.44E-01 | 1.06  | 1.45E-01 |
| EHD2     | 0.16 | 4.36E-01 | 1.23  | 1.10E-01 | -1.03 | 8.49E-01 |
| ADCK4    | 0.16 | 4.36E-01 | -1.34 | 9.10E-01 | 0.10  | 4.60E-01 |
| CNNM4    | 0.16 | 4.36E-01 | 1.83  | 3.33E-02 | 0.33  | 3.69E-01 |
| OGDH     | 0.16 | 4.36E-01 | 0.12  | 4.50E-01 | 0.54  | 2.94E-01 |
| HARS2    | 0.16 | 4.36E-01 | -1.10 | 8.65E-01 | 0.24  | 4.03E-01 |
| RNASET2  | 0.16 | 4.36E-01 | 1.03  | 1.51E-01 | -0.18 | 5.72E-01 |
| TREML1   | 0.16 | 4.37E-01 | -0.40 | 6.56E-01 | 1.40  | 8.01E-02 |

|           |      |          |       |          |       |          |
|-----------|------|----------|-------|----------|-------|----------|
| OPRL1     | 0.16 | 4.37E-01 | 1.18  | 1.19E-01 | -0.02 | 5.10E-01 |
| C5orf51   | 0.16 | 4.37E-01 | 0.31  | 3.78E-01 | -0.81 | 7.91E-01 |
| IL1F10    | 0.16 | 4.37E-01 | -0.50 | 6.93E-01 | 0.86  | 1.94E-01 |
| ZNF692    | 0.16 | 4.37E-01 | 0.65  | 2.57E-01 | -0.30 | 6.19E-01 |
| MT4       | 0.16 | 4.37E-01 | 0.46  | 3.24E-01 | 0.53  | 2.99E-01 |
| CUBN      | 0.16 | 4.37E-01 | 0.16  | 4.36E-01 | -1.16 | 8.76E-01 |
| OR4C6     | 0.16 | 4.37E-01 | -0.58 | 7.20E-01 | 1.05  | 1.47E-01 |
| AHSA2     | 0.16 | 4.37E-01 | -0.15 | 5.61E-01 | -0.22 | 5.87E-01 |
| S100A8    | 0.16 | 4.37E-01 | -3.53 | 1.00E+00 | 0.69  | 2.44E-01 |
| CTLA4     | 0.16 | 4.37E-01 | -0.01 | 5.03E-01 | -0.56 | 7.11E-01 |
| CA2       | 0.16 | 4.37E-01 | -0.06 | 5.23E-01 | -0.91 | 8.17E-01 |
| APPBP2    | 0.16 | 4.37E-01 | 0.65  | 2.58E-01 | -1.05 | 8.53E-01 |
| CHRNA1    | 0.16 | 4.37E-01 | 0.62  | 2.67E-01 | 0.15  | 4.39E-01 |
| N4BP2     | 0.16 | 4.37E-01 | -0.06 | 5.24E-01 | 0.81  | 2.09E-01 |
| CEBPZ-AS1 | 0.16 | 4.37E-01 | 0.20  | 4.21E-01 | 0.40  | 3.43E-01 |
| CDC5L     | 0.16 | 4.38E-01 | 0.13  | 4.49E-01 | 0.54  | 2.95E-01 |
| WFDC13    | 0.16 | 4.38E-01 | 0.20  | 4.22E-01 | -0.11 | 5.44E-01 |
| MAD2L1BP  | 0.16 | 4.38E-01 | 0.50  | 3.07E-01 | -1.21 | 8.87E-01 |
| PAPPA     | 0.16 | 4.38E-01 | 0.45  | 3.27E-01 | -0.11 | 5.44E-01 |
| HHATL     | 0.16 | 4.38E-01 | 0.03  | 4.89E-01 | 0.29  | 3.86E-01 |
| ATP6V0A4  | 0.16 | 4.38E-01 | 1.14  | 1.28E-01 | 0.17  | 4.31E-01 |
| HTR1E     | 0.16 | 4.38E-01 | 0.16  | 4.37E-01 | -0.64 | 7.38E-01 |
| KLF10     | 0.16 | 4.38E-01 | 0.79  | 2.14E-01 | -1.26 | 8.95E-01 |
| ZNF680    | 0.16 | 4.38E-01 | 0.62  | 2.69E-01 | -1.69 | 9.55E-01 |
| SLC34A1   | 0.15 | 4.38E-01 | 0.14  | 4.45E-01 | -1.07 | 8.57E-01 |
| ACD       | 0.15 | 4.39E-01 | -0.82 | 7.95E-01 | 1.03  | 1.52E-01 |
| CEACAM21  | 0.15 | 4.39E-01 | 0.18  | 4.27E-01 | 0.20  | 4.19E-01 |
| TCP11L1   | 0.15 | 4.39E-01 | -0.43 | 6.68E-01 | 0.18  | 4.30E-01 |
| MYOD1     | 0.15 | 4.39E-01 | -1.32 | 9.07E-01 | 0.54  | 2.94E-01 |
| GOSR1     | 0.15 | 4.39E-01 | 0.20  | 4.21E-01 | -0.68 | 7.51E-01 |
| TAS2R40   | 0.15 | 4.39E-01 | 1.18  | 1.19E-01 | -0.51 | 6.95E-01 |

|           |      |          |       |          |       |          |
|-----------|------|----------|-------|----------|-------|----------|
| PGR       | 0.15 | 4.39E-01 | 0.72  | 2.36E-01 | -0.16 | 5.64E-01 |
| RUFY3     | 0.15 | 4.39E-01 | -0.37 | 6.46E-01 | 0.23  | 4.09E-01 |
| IER3IP1   | 0.15 | 4.39E-01 | 0.07  | 4.74E-01 | -0.96 | 8.33E-01 |
| TEX12     | 0.15 | 4.39E-01 | 0.03  | 4.88E-01 | 0.17  | 4.34E-01 |
| TM2D1     | 0.15 | 4.39E-01 | 1.09  | 1.38E-01 | -1.45 | 9.27E-01 |
| KRT27     | 0.15 | 4.39E-01 | 0.19  | 4.23E-01 | 0.13  | 4.50E-01 |
| LRP11     | 0.15 | 4.39E-01 | -0.90 | 8.16E-01 | 0.35  | 3.65E-01 |
| GOLGA6L2  | 0.15 | 4.39E-01 | 1.28  | 1.00E-01 | -0.25 | 6.00E-01 |
| MTG2      | 0.15 | 4.39E-01 | 0.61  | 2.71E-01 | 0.24  | 4.04E-01 |
| GTF2H3    | 0.15 | 4.40E-01 | -0.12 | 5.48E-01 | 0.56  | 2.86E-01 |
| ALDH1A2   | 0.15 | 4.40E-01 | -0.30 | 6.19E-01 | 0.39  | 3.48E-01 |
| FUOM      | 0.15 | 4.40E-01 | -0.71 | 7.62E-01 | 0.70  | 2.42E-01 |
| KRT6A     | 0.15 | 4.40E-01 | -1.03 | 8.49E-01 | -0.13 | 5.51E-01 |
| TWIST1    | 0.15 | 4.40E-01 | 0.59  | 2.79E-01 | 0.15  | 4.42E-01 |
| FAM134C   | 0.15 | 4.40E-01 | -0.89 | 8.12E-01 | -0.11 | 5.43E-01 |
| FAM171A1  | 0.15 | 4.40E-01 | 1.13  | 1.28E-01 | -1.60 | 9.45E-01 |
| MRPS25    | 0.15 | 4.40E-01 | -0.71 | 7.61E-01 | -0.15 | 5.58E-01 |
| CDK5RAP3  | 0.15 | 4.40E-01 | 0.15  | 4.41E-01 | 1.80  | 3.57E-02 |
| AJAP1     | 0.15 | 4.40E-01 | -0.45 | 6.73E-01 | 0.58  | 2.81E-01 |
| KRTAP24-1 | 0.15 | 4.40E-01 | -0.14 | 5.56E-01 | -0.46 | 6.79E-01 |
| GJC2      | 0.15 | 4.40E-01 | 0.88  | 1.89E-01 | -0.79 | 7.86E-01 |
| KCTD2     | 0.15 | 4.40E-01 | 0.09  | 4.64E-01 | 0.86  | 1.95E-01 |
| EIF2B1    | 0.15 | 4.40E-01 | 0.05  | 4.80E-01 | 1.28  | 1.00E-01 |
| CHI3L1    | 0.15 | 4.40E-01 | 0.18  | 4.27E-01 | 0.21  | 4.16E-01 |
| SYN3      | 0.15 | 4.40E-01 | 0.07  | 4.73E-01 | 0.59  | 2.79E-01 |
| TTC9B     | 0.15 | 4.40E-01 | 1.73  | 4.19E-02 | 0.39  | 3.47E-01 |
| FAM71F2   | 0.15 | 4.40E-01 | -0.02 | 5.08E-01 | -0.56 | 7.12E-01 |
| EPS8L1    | 0.15 | 4.40E-01 | -0.32 | 6.24E-01 | 2.16  | 1.54E-02 |
| CSTF1     | 0.15 | 4.40E-01 | -0.55 | 7.08E-01 | -0.20 | 5.81E-01 |
| FRG1      | 0.15 | 4.40E-01 | -0.19 | 5.75E-01 | 1.33  | 9.15E-02 |
| RPRD1A    | 0.15 | 4.40E-01 | 0.45  | 3.26E-01 | -0.38 | 6.47E-01 |

|          |      |          |       |          |       |          |
|----------|------|----------|-------|----------|-------|----------|
| STPG2    | 0.15 | 4.41E-01 | -0.60 | 7.25E-01 | 1.35  | 8.78E-02 |
| PRKCSH   | 0.15 | 4.41E-01 | 1.29  | 9.92E-02 | 0.38  | 3.51E-01 |
| TYROBP   | 0.15 | 4.41E-01 | -0.46 | 6.76E-01 | 0.56  | 2.89E-01 |
| ATP11B   | 0.15 | 4.41E-01 | 0.06  | 4.75E-01 | 1.51  | 6.56E-02 |
| GRM3     | 0.15 | 4.41E-01 | -0.60 | 7.25E-01 | -0.46 | 6.77E-01 |
| PIH1D2   | 0.15 | 4.41E-01 | 1.07  | 1.43E-01 | -0.15 | 5.61E-01 |
| IP6K1    | 0.15 | 4.41E-01 | -0.96 | 8.31E-01 | 1.09  | 1.37E-01 |
| SLC35A4  | 0.15 | 4.41E-01 | 0.32  | 3.76E-01 | -0.72 | 7.64E-01 |
| CDK18    | 0.15 | 4.41E-01 | 0.76  | 2.23E-01 | -0.02 | 5.08E-01 |
| AFAP1L1  | 0.15 | 4.41E-01 | -1.10 | 8.65E-01 | 0.56  | 2.86E-01 |
| NOP10    | 0.15 | 4.41E-01 | -0.59 | 7.24E-01 | -0.17 | 5.69E-01 |
| AGA      | 0.15 | 4.41E-01 | 1.25  | 1.05E-01 | -0.42 | 6.63E-01 |
| ITGA11   | 0.15 | 4.41E-01 | 0.31  | 3.79E-01 | -0.78 | 7.83E-01 |
| SPIRE2   | 0.15 | 4.41E-01 | -0.16 | 5.63E-01 | 0.36  | 3.61E-01 |
| OR7G3    | 0.15 | 4.41E-01 | -0.80 | 7.88E-01 | 0.23  | 4.08E-01 |
| PTPMT1   | 0.15 | 4.41E-01 | 1.02  | 1.54E-01 | -0.39 | 6.51E-01 |
| GCSH     | 0.15 | 4.41E-01 | -1.07 | 8.58E-01 | 0.55  | 2.93E-01 |
| WRAP73   | 0.15 | 4.41E-01 | -0.75 | 7.72E-01 | 0.20  | 4.20E-01 |
| NDUFB3   | 0.15 | 4.42E-01 | -0.12 | 5.49E-01 | -1.01 | 8.43E-01 |
| PTPRB    | 0.15 | 4.42E-01 | -0.73 | 7.66E-01 | -0.20 | 5.79E-01 |
| TAF7     | 0.15 | 4.42E-01 | -0.96 | 8.32E-01 | -0.20 | 5.80E-01 |
| AP4M1    | 0.15 | 4.42E-01 | -0.92 | 8.20E-01 | 1.63  | 5.14E-02 |
| CREBZF   | 0.15 | 4.42E-01 | 0.09  | 4.65E-01 | 0.03  | 4.87E-01 |
| TMC2     | 0.15 | 4.42E-01 | 0.28  | 3.89E-01 | -1.42 | 9.23E-01 |
| MTMR6    | 0.15 | 4.42E-01 | -0.14 | 5.55E-01 | -0.71 | 7.60E-01 |
| NOL3     | 0.15 | 4.42E-01 | -0.83 | 7.96E-01 | -0.36 | 6.40E-01 |
| ADAMTS1  | 0.15 | 4.42E-01 | -0.09 | 5.34E-01 | -0.27 | 6.05E-01 |
| TRAF3    | 0.15 | 4.42E-01 | -0.29 | 6.14E-01 | 1.57  | 5.79E-02 |
| MEX3B    | 0.15 | 4.42E-01 | -0.12 | 5.49E-01 | 0.37  | 3.54E-01 |
| INPP1    | 0.15 | 4.42E-01 | 0.19  | 4.25E-01 | -0.83 | 7.97E-01 |
| C6orf123 | 0.14 | 4.42E-01 | -0.34 | 6.31E-01 | 0.43  | 3.34E-01 |

|          |      |          |       |          |       |          |
|----------|------|----------|-------|----------|-------|----------|
| PIKFYVE  | 0.14 | 4.42E-01 | 0.85  | 1.98E-01 | -0.77 | 7.79E-01 |
| PELI1    | 0.14 | 4.43E-01 | -0.38 | 6.50E-01 | 0.53  | 2.99E-01 |
| LCE2A    | 0.14 | 4.43E-01 | -1.21 | 8.88E-01 | 1.52  | 6.46E-02 |
| ANXA2R   | 0.14 | 4.43E-01 | -0.09 | 5.35E-01 | -0.33 | 6.30E-01 |
| H1FNT    | 0.14 | 4.43E-01 | -0.41 | 6.60E-01 | -0.63 | 7.37E-01 |
| AP2A1    | 0.14 | 4.43E-01 | 0.76  | 2.24E-01 | -2.02 | 9.78E-01 |
| TOPBP1   | 0.14 | 4.43E-01 | 0.11  | 4.58E-01 | 0.85  | 1.99E-01 |
| CBFB     | 0.14 | 4.43E-01 | -1.10 | 8.63E-01 | -0.01 | 5.06E-01 |
| CNPY2    | 0.14 | 4.43E-01 | -0.67 | 7.50E-01 | 1.81  | 3.51E-02 |
| ARHGAP35 | 0.14 | 4.43E-01 | -0.20 | 5.78E-01 | 0.42  | 3.39E-01 |
| CCDC66   | 0.14 | 4.43E-01 | 0.10  | 4.59E-01 | 0.94  | 1.74E-01 |
| SCGB3A2  | 0.14 | 4.43E-01 | 0.09  | 4.65E-01 | -0.85 | 8.01E-01 |
| IRF8     | 0.14 | 4.43E-01 | -0.03 | 5.12E-01 | 0.57  | 2.85E-01 |
| ST7-OT4  | 0.14 | 4.43E-01 | 0.41  | 3.40E-01 | -0.45 | 6.75E-01 |
| DNAH100S | 0.14 | 4.43E-01 | 0.62  | 2.67E-01 | 0.79  | 2.15E-01 |
| ZNF45    | 0.14 | 4.43E-01 | -0.01 | 5.02E-01 | -0.37 | 6.43E-01 |
| PUS10    | 0.14 | 4.43E-01 | 0.39  | 3.47E-01 | -0.14 | 5.56E-01 |
| HSPB11   | 0.14 | 4.43E-01 | -0.33 | 6.30E-01 | 0.41  | 3.41E-01 |
| SH3TC2   | 0.14 | 4.44E-01 | 0.85  | 1.98E-01 | -0.03 | 5.10E-01 |
| KDELR2   | 0.14 | 4.44E-01 | -0.30 | 6.17E-01 | 0.04  | 4.85E-01 |
| TSPO     | 0.14 | 4.44E-01 | 0.15  | 4.40E-01 | -0.81 | 7.91E-01 |
| MYL3     | 0.14 | 4.44E-01 | -0.97 | 8.35E-01 | 0.26  | 3.97E-01 |
| CCNI2    | 0.14 | 4.44E-01 | 0.05  | 4.81E-01 | 1.70  | 4.43E-02 |
| PTK2     | 0.14 | 4.44E-01 | -0.57 | 7.16E-01 | -0.13 | 5.50E-01 |
| FAM179B  | 0.14 | 4.44E-01 | 0.59  | 2.79E-01 | 0.33  | 3.72E-01 |
| SNAPC5   | 0.14 | 4.44E-01 | -0.48 | 6.83E-01 | 0.84  | 2.00E-01 |
| ARL5C    | 0.14 | 4.44E-01 | 0.90  | 1.85E-01 | 0.63  | 2.63E-01 |
| LEMD1    | 0.14 | 4.44E-01 | 0.55  | 2.93E-01 | -0.64 | 7.39E-01 |
| CARD10   | 0.14 | 4.44E-01 | 0.25  | 3.99E-01 | -1.40 | 9.20E-01 |
| DNAJB8   | 0.14 | 4.44E-01 | -0.38 | 6.47E-01 | 2.34  | 9.59E-03 |
| LPCAT4   | 0.14 | 4.44E-01 | 0.36  | 3.59E-01 | -0.80 | 7.89E-01 |

|            |      |          |       |          |       |          |
|------------|------|----------|-------|----------|-------|----------|
| MRPS5      | 0.14 | 4.44E-01 | 0.49  | 3.13E-01 | -0.15 | 5.58E-01 |
| CHMP6      | 0.14 | 4.44E-01 | -0.38 | 6.49E-01 | -0.02 | 5.08E-01 |
| RP11-1C1.5 | 0.14 | 4.44E-01 | -0.38 | 6.47E-01 | 1.23  | 1.09E-01 |
| FGF14      | 0.14 | 4.44E-01 | -0.28 | 6.09E-01 | -0.12 | 5.47E-01 |
| CEP41      | 0.14 | 4.44E-01 | 0.77  | 2.22E-01 | 0.31  | 3.77E-01 |
| FICD       | 0.14 | 4.44E-01 | 0.93  | 1.77E-01 | 0.00  | 5.02E-01 |
| WDFY2      | 0.14 | 4.44E-01 | 1.05  | 1.48E-01 | -1.27 | 8.98E-01 |
| OR6K6      | 0.14 | 4.44E-01 | 0.38  | 3.53E-01 | -2.02 | 9.78E-01 |
| TGM4       | 0.14 | 4.44E-01 | -1.21 | 8.88E-01 | 0.55  | 2.91E-01 |
| TXNL4B     | 0.14 | 4.45E-01 | 0.02  | 4.91E-01 | 0.71  | 2.38E-01 |
| MINPP1     | 0.14 | 4.45E-01 | -0.69 | 7.56E-01 | -0.24 | 5.94E-01 |
| OGFOD3     | 0.14 | 4.45E-01 | 0.40  | 3.46E-01 | -0.53 | 7.01E-01 |
| MTERFD3    | 0.14 | 4.45E-01 | -1.20 | 8.84E-01 | 0.71  | 2.38E-01 |
| CHRNA6     | 0.14 | 4.45E-01 | 0.02  | 4.93E-01 | 0.37  | 3.54E-01 |
| LRRC10     | 0.14 | 4.45E-01 | -0.09 | 5.36E-01 | 0.12  | 4.54E-01 |
| TMEM160    | 0.14 | 4.45E-01 | 0.77  | 2.22E-01 | -1.02 | 8.46E-01 |
| YKT6       | 0.14 | 4.45E-01 | 0.19  | 4.24E-01 | -1.60 | 9.46E-01 |
| PABPC4     | 0.14 | 4.45E-01 | 0.03  | 4.89E-01 | -0.53 | 7.01E-01 |
| LHX8       | 0.14 | 4.45E-01 | 0.17  | 4.33E-01 | -0.15 | 5.60E-01 |
| CHL1       | 0.14 | 4.45E-01 | 0.39  | 3.50E-01 | -1.73 | 9.58E-01 |
| MPHOSPH10  | 0.14 | 4.45E-01 | 0.33  | 3.71E-01 | -0.21 | 5.85E-01 |
| FAM153A    | 0.14 | 4.45E-01 | 0.35  | 3.62E-01 | 0.22  | 4.15E-01 |
| GAD1       | 0.14 | 4.45E-01 | -1.57 | 9.42E-01 | 1.19  | 1.17E-01 |
| UBQLN1     | 0.14 | 4.45E-01 | 0.42  | 3.36E-01 | 0.02  | 4.90E-01 |
| KCNJ5      | 0.14 | 4.45E-01 | 0.10  | 4.60E-01 | -0.73 | 7.67E-01 |
| TXNDC5     | 0.14 | 4.45E-01 | 2.34  | 9.64E-03 | -0.30 | 6.19E-01 |
| FAM89B     | 0.14 | 4.45E-01 | 0.20  | 4.20E-01 | -0.35 | 6.37E-01 |
| ZNF354A    | 0.14 | 4.45E-01 | 1.30  | 9.66E-02 | 0.57  | 2.83E-01 |
| MBOAT2     | 0.14 | 4.46E-01 | 0.11  | 4.57E-01 | -0.50 | 6.92E-01 |
| PHGDH      | 0.14 | 4.46E-01 | 0.17  | 4.32E-01 | -0.27 | 6.07E-01 |
| OPA1       | 0.14 | 4.46E-01 | -0.57 | 7.14E-01 | -0.12 | 5.47E-01 |

|            |      |          |       |          |       |          |
|------------|------|----------|-------|----------|-------|----------|
| TMUB1      | 0.14 | 4.46E-01 | 0.28  | 3.90E-01 | 0.80  | 2.11E-01 |
| LGR4       | 0.14 | 4.46E-01 | -0.51 | 6.94E-01 | 0.15  | 4.41E-01 |
| KRBA2      | 0.14 | 4.46E-01 | 1.05  | 1.47E-01 | -0.26 | 6.04E-01 |
| MAPK15     | 0.14 | 4.46E-01 | 1.34  | 9.03E-02 | 0.61  | 2.70E-01 |
| WIBG       | 0.14 | 4.46E-01 | 0.66  | 2.56E-01 | -1.08 | 8.60E-01 |
| TMEM134    | 0.14 | 4.46E-01 | 1.02  | 1.55E-01 | -0.94 | 8.26E-01 |
| C9orf69    | 0.14 | 4.46E-01 | -0.51 | 6.95E-01 | -0.24 | 5.94E-01 |
| CDH3       | 0.14 | 4.46E-01 | -0.80 | 7.88E-01 | -0.20 | 5.78E-01 |
| SMAD5      | 0.13 | 4.46E-01 | 1.15  | 1.24E-01 | -0.19 | 5.74E-01 |
| C12orf10   | 0.13 | 4.46E-01 | 0.41  | 3.39E-01 | -1.80 | 9.64E-01 |
| YIPF2      | 0.13 | 4.46E-01 | 1.11  | 1.33E-01 | -1.79 | 9.63E-01 |
| LSG1       | 0.13 | 4.46E-01 | -0.75 | 7.74E-01 | -0.07 | 5.27E-01 |
| WDR88      | 0.13 | 4.47E-01 | -0.12 | 5.50E-01 | -0.69 | 7.55E-01 |
| CDK5RAP1   | 0.13 | 4.47E-01 | 0.70  | 2.42E-01 | -1.13 | 8.71E-01 |
| ZNF670     | 0.13 | 4.47E-01 | -1.20 | 8.84E-01 | 0.44  | 3.29E-01 |
| CRYAA      | 0.13 | 4.47E-01 | 0.09  | 4.63E-01 | -0.65 | 7.41E-01 |
| NDUFV2     | 0.13 | 4.47E-01 | -0.08 | 5.32E-01 | -0.03 | 5.13E-01 |
| HAS1       | 0.13 | 4.47E-01 | -0.86 | 8.06E-01 | 0.72  | 2.37E-01 |
| ANP32E     | 0.13 | 4.47E-01 | 0.18  | 4.28E-01 | 0.27  | 3.93E-01 |
| ST6GALNAC3 | 0.13 | 4.47E-01 | -0.17 | 5.69E-01 | 0.32  | 3.73E-01 |
| MGARP      | 0.13 | 4.47E-01 | 0.89  | 1.86E-01 | -2.07 | 9.81E-01 |
| TMPRSS15   | 0.13 | 4.47E-01 | -1.21 | 8.87E-01 | 2.05  | 2.01E-02 |
| PTGDR2     | 0.13 | 4.47E-01 | 0.42  | 3.37E-01 | -0.93 | 8.23E-01 |
| SKIDA1     | 0.13 | 4.47E-01 | -0.33 | 6.30E-01 | 0.00  | 5.01E-01 |
| PLEKHG5    | 0.13 | 4.47E-01 | 0.08  | 4.68E-01 | -0.19 | 5.77E-01 |
| FLRT2      | 0.13 | 4.47E-01 | -0.17 | 5.69E-01 | -1.09 | 8.62E-01 |
| DEFB135    | 0.13 | 4.47E-01 | -0.01 | 5.03E-01 | -0.88 | 8.10E-01 |
| SNAP91     | 0.13 | 4.48E-01 | 0.23  | 4.11E-01 | 3.15  | 8.09E-04 |
| LAPTM5     | 0.13 | 4.48E-01 | 0.49  | 3.13E-01 | -1.93 | 9.73E-01 |
| FBXW2      | 0.13 | 4.48E-01 | -0.01 | 5.03E-01 | 0.13  | 4.47E-01 |
| NRG4       | 0.13 | 4.48E-01 | 1.20  | 1.15E-01 | -0.66 | 7.47E-01 |



|              |      |          |       |          |       |          |
|--------------|------|----------|-------|----------|-------|----------|
| C9orf66      | 0.13 | 4.48E-01 | -0.11 | 5.42E-01 | -0.76 | 7.76E-01 |
| FJX1         | 0.13 | 4.48E-01 | 1.01  | 1.56E-01 | -0.48 | 6.83E-01 |
| MTSS1L       | 0.13 | 4.48E-01 | 1.47  | 7.06E-02 | 0.59  | 2.79E-01 |
| MRPL14       | 0.13 | 4.48E-01 | 2.11  | 1.75E-02 | -0.65 | 7.41E-01 |
| ACTR3B       | 0.13 | 4.48E-01 | 1.08  | 1.39E-01 | -0.37 | 6.44E-01 |
| CD274        | 0.13 | 4.48E-01 | -0.57 | 7.15E-01 | -0.43 | 6.66E-01 |
| HECTD2       | 0.13 | 4.48E-01 | 0.80  | 2.13E-01 | -1.02 | 8.45E-01 |
| TOMM20L      | 0.13 | 4.48E-01 | -0.10 | 5.40E-01 | 0.34  | 3.66E-01 |
| ZBTB8B       | 0.13 | 4.48E-01 | 0.43  | 3.32E-01 | -2.20 | 9.86E-01 |
| CST3         | 0.13 | 4.48E-01 | -0.42 | 6.62E-01 | 1.29  | 9.79E-02 |
| TCEA3        | 0.13 | 4.49E-01 | 2.65  | 3.99E-03 | 0.98  | 1.64E-01 |
| TRIM14       | 0.13 | 4.49E-01 | -0.13 | 5.53E-01 | 0.20  | 4.22E-01 |
| KLF9         | 0.13 | 4.49E-01 | -1.88 | 9.70E-01 | 1.18  | 1.19E-01 |
| SIL1         | 0.13 | 4.49E-01 | -0.15 | 5.58E-01 | 0.16  | 4.35E-01 |
| UBE4B        | 0.13 | 4.49E-01 | 0.88  | 1.90E-01 | 0.47  | 3.21E-01 |
| TSG101       | 0.13 | 4.49E-01 | -1.37 | 9.15E-01 | 0.95  | 1.70E-01 |
| THEM4        | 0.13 | 4.49E-01 | 1.58  | 5.71E-02 | -0.51 | 6.94E-01 |
| SRRD         | 0.13 | 4.49E-01 | 0.47  | 3.18E-01 | 0.10  | 4.58E-01 |
| AGO4         | 0.13 | 4.49E-01 | 0.09  | 4.64E-01 | 0.85  | 1.98E-01 |
| PRDX2        | 0.13 | 4.49E-01 | -1.14 | 8.73E-01 | 0.34  | 3.67E-01 |
| PTCHD3       | 0.13 | 4.49E-01 | 0.50  | 3.10E-01 | -1.04 | 8.50E-01 |
| TNNC2        | 0.13 | 4.49E-01 | -0.51 | 6.96E-01 | -0.15 | 5.60E-01 |
| CLEC6A       | 0.13 | 4.49E-01 | -0.82 | 7.94E-01 | 1.40  | 8.15E-02 |
| C17orf104    | 0.13 | 4.49E-01 | 1.34  | 8.97E-02 | 0.09  | 4.64E-01 |
| KRTAP5-9     | 0.13 | 4.49E-01 | -0.69 | 7.55E-01 | -0.35 | 6.38E-01 |
| SLC25A21-AS1 | 0.13 | 4.49E-01 | 0.10  | 4.59E-01 | -0.80 | 7.87E-01 |
| DENND2A      | 0.13 | 4.50E-01 | -0.54 | 7.05E-01 | -0.05 | 5.20E-01 |
| MYLIP        | 0.13 | 4.50E-01 | 0.90  | 1.84E-01 | -1.45 | 9.26E-01 |
| RPL22L1      | 0.13 | 4.50E-01 | -1.12 | 8.69E-01 | 0.40  | 3.46E-01 |
| FAM183B      | 0.13 | 4.50E-01 | 1.38  | 8.31E-02 | -1.66 | 9.52E-01 |
| ASNA1        | 0.13 | 4.50E-01 | -0.32 | 6.27E-01 | 0.01  | 4.97E-01 |

|          |      |          |       |          |       |          |
|----------|------|----------|-------|----------|-------|----------|
| NFKB1    | 0.13 | 4.50E-01 | 1.02  | 1.55E-01 | 0.54  | 2.94E-01 |
| C11orf63 | 0.13 | 4.50E-01 | -1.66 | 9.51E-01 | 0.40  | 3.45E-01 |
| AURKB    | 0.13 | 4.50E-01 | 1.10  | 1.36E-01 | 0.97  | 1.67E-01 |
| SH2D3C   | 0.13 | 4.50E-01 | -0.80 | 7.90E-01 | 1.37  | 8.56E-02 |
| TOMM40L  | 0.13 | 4.50E-01 | -0.08 | 5.31E-01 | -0.22 | 5.88E-01 |
| HSF2     | 0.13 | 4.50E-01 | 0.76  | 2.25E-01 | -0.93 | 8.24E-01 |
| FBLL1    | 0.13 | 4.50E-01 | -0.43 | 6.68E-01 | 0.36  | 3.61E-01 |
| SH2D7    | 0.12 | 4.50E-01 | 0.52  | 3.01E-01 | -0.67 | 7.48E-01 |
| TBRG1    | 0.12 | 4.50E-01 | -0.19 | 5.77E-01 | -0.92 | 8.21E-01 |
| ACOT4    | 0.12 | 4.50E-01 | 0.45  | 3.28E-01 | 1.27  | 1.02E-01 |
| PMEPA1   | 0.12 | 4.50E-01 | -0.58 | 7.18E-01 | 2.14  | 1.61E-02 |
| DHDH     | 0.12 | 4.50E-01 | -0.61 | 7.30E-01 | 1.04  | 1.49E-01 |
| TDRD10   | 0.12 | 4.51E-01 | -0.72 | 7.64E-01 | 0.99  | 1.60E-01 |
| PRLR     | 0.12 | 4.51E-01 | 0.44  | 3.30E-01 | -0.53 | 7.00E-01 |
| ACP5     | 0.12 | 4.51E-01 | 1.28  | 9.96E-02 | 0.32  | 3.73E-01 |
| PTPN12   | 0.12 | 4.51E-01 | 0.84  | 2.01E-01 | 0.21  | 4.15E-01 |
| NT5C3A   | 0.12 | 4.51E-01 | -1.75 | 9.60E-01 | 0.95  | 1.71E-01 |
| IL11RA   | 0.12 | 4.51E-01 | 0.03  | 4.88E-01 | 0.70  | 2.42E-01 |
| DTX3L    | 0.12 | 4.51E-01 | -0.09 | 5.37E-01 | -0.94 | 8.27E-01 |
| DKK3     | 0.12 | 4.51E-01 | 0.35  | 3.64E-01 | 0.40  | 3.43E-01 |
| KIAA1467 | 0.12 | 4.51E-01 | 0.17  | 4.34E-01 | 0.24  | 4.05E-01 |
| OBP2A    | 0.12 | 4.51E-01 | -0.03 | 5.10E-01 | -0.23 | 5.91E-01 |
| RIT2     | 0.12 | 4.51E-01 | 0.23  | 4.11E-01 | 0.41  | 3.41E-01 |
| MTUS2    | 0.12 | 4.51E-01 | 0.29  | 3.84E-01 | 0.29  | 3.85E-01 |
| SLC18B1  | 0.12 | 4.51E-01 | -0.18 | 5.70E-01 | 1.31  | 9.44E-02 |
| BHLHE40  | 0.12 | 4.51E-01 | 0.00  | 5.01E-01 | 1.32  | 9.34E-02 |
| NLRP9    | 0.12 | 4.51E-01 | -0.16 | 5.64E-01 | -0.11 | 5.46E-01 |
| IVNS1ABP | 0.12 | 4.51E-01 | 1.25  | 1.07E-01 | -0.68 | 7.51E-01 |
| MCTP2    | 0.12 | 4.51E-01 | 0.12  | 4.52E-01 | 1.35  | 8.86E-02 |
| ZNF649   | 0.12 | 4.51E-01 | -0.30 | 6.20E-01 | -0.03 | 5.12E-01 |
| SLC2A12  | 0.12 | 4.51E-01 | 0.12  | 4.51E-01 | -0.02 | 5.09E-01 |

|         |      |          |       |          |       |          |
|---------|------|----------|-------|----------|-------|----------|
| TMED3   | 0.12 | 4.52E-01 | 0.14  | 4.44E-01 | 1.20  | 1.16E-01 |
| CASP8   | 0.12 | 4.52E-01 | 0.80  | 2.12E-01 | -1.56 | 9.41E-01 |
| MTHFD1  | 0.12 | 4.52E-01 | 0.65  | 2.58E-01 | 0.10  | 4.60E-01 |
| MKMK2   | 0.12 | 4.52E-01 | -0.04 | 5.17E-01 | 0.25  | 4.00E-01 |
| RCHY1   | 0.12 | 4.52E-01 | 0.36  | 3.61E-01 | 0.77  | 2.22E-01 |
| HOXB3   | 0.12 | 4.52E-01 | 0.66  | 2.55E-01 | 0.12  | 4.54E-01 |
| PLD3    | 0.12 | 4.52E-01 | 2.09  | 1.84E-02 | 0.39  | 3.50E-01 |
| UBE2D3  | 0.12 | 4.52E-01 | 0.00  | 5.01E-01 | -0.38 | 6.49E-01 |
| KCTD4   | 0.12 | 4.52E-01 | 1.01  | 1.57E-01 | 0.48  | 3.16E-01 |
| YPEL2   | 0.12 | 4.52E-01 | -1.10 | 8.64E-01 | 0.25  | 4.00E-01 |
| REPIN1  | 0.12 | 4.52E-01 | -0.65 | 7.42E-01 | -0.24 | 5.95E-01 |
| CALML3  | 0.12 | 4.52E-01 | 0.58  | 2.83E-01 | -1.70 | 9.56E-01 |
| OR1A1   | 0.12 | 4.53E-01 | 0.15  | 4.40E-01 | 0.15  | 4.41E-01 |
| SBNO2   | 0.12 | 4.53E-01 | -0.81 | 7.92E-01 | 0.64  | 2.61E-01 |
| PPP2R2B | 0.12 | 4.53E-01 | -1.15 | 8.74E-01 | 1.51  | 6.58E-02 |
| TMEM127 | 0.12 | 4.53E-01 | 0.21  | 4.18E-01 | -0.57 | 7.15E-01 |
| ITFG3   | 0.12 | 4.53E-01 | -0.88 | 8.12E-01 | 0.29  | 3.84E-01 |
| MT1G    | 0.12 | 4.53E-01 | -0.80 | 7.88E-01 | 0.08  | 4.68E-01 |
| MS4A5   | 0.12 | 4.53E-01 | 0.07  | 4.72E-01 | 0.76  | 2.24E-01 |
| SERPIN8 | 0.12 | 4.53E-01 | -0.94 | 8.26E-01 | -0.47 | 6.81E-01 |
| GPR63   | 0.12 | 4.53E-01 | -0.55 | 7.10E-01 | -0.26 | 6.01E-01 |
| ID3     | 0.12 | 4.53E-01 | -0.18 | 5.71E-01 | -0.05 | 5.22E-01 |
| DSP     | 0.12 | 4.53E-01 | -1.07 | 8.58E-01 | 0.23  | 4.09E-01 |
| CHRNA3  | 0.12 | 4.53E-01 | -0.95 | 8.28E-01 | 0.94  | 1.75E-01 |
| YLPM1   | 0.12 | 4.54E-01 | -0.29 | 6.14E-01 | 0.47  | 3.18E-01 |
| BTBD6   | 0.12 | 4.54E-01 | -0.52 | 6.99E-01 | 0.26  | 3.98E-01 |
| HEPN1   | 0.12 | 4.54E-01 | -0.17 | 5.67E-01 | -0.66 | 7.45E-01 |
| KRT77   | 0.12 | 4.54E-01 | 1.11  | 1.33E-01 | 0.09  | 4.62E-01 |
| GPR87   | 0.12 | 4.54E-01 | 0.56  | 2.88E-01 | -1.54 | 9.38E-01 |
| AMER2   | 0.12 | 4.54E-01 | 0.61  | 2.69E-01 | -1.28 | 9.00E-01 |
| POLH    | 0.12 | 4.54E-01 | -0.52 | 6.97E-01 | -0.28 | 6.12E-01 |

|               |      |          |       |          |       |          |
|---------------|------|----------|-------|----------|-------|----------|
| PTPRCAP       | 0.12 | 4.54E-01 | 0.69  | 2.44E-01 | -0.37 | 6.46E-01 |
| TG            | 0.12 | 4.54E-01 | -0.95 | 8.28E-01 | 0.72  | 2.35E-01 |
| TMEM174       | 0.12 | 4.54E-01 | -1.20 | 8.85E-01 | 0.21  | 4.17E-01 |
| AGGF1         | 0.12 | 4.54E-01 | 0.52  | 3.01E-01 | -0.96 | 8.33E-01 |
| EMC10         | 0.12 | 4.54E-01 | 0.82  | 2.05E-01 | -0.20 | 5.81E-01 |
| FGGY          | 0.11 | 4.54E-01 | -0.59 | 7.21E-01 | 0.36  | 3.61E-01 |
| FIZ1          | 0.11 | 4.55E-01 | 1.17  | 1.20E-01 | -0.21 | 5.84E-01 |
| GNG5          | 0.11 | 4.55E-01 | 0.68  | 2.47E-01 | -0.47 | 6.82E-01 |
| RP11-366L20.2 | 0.11 | 4.55E-01 | 1.51  | 6.58E-02 | -1.29 | 9.01E-01 |
| TMEM33        | 0.11 | 4.55E-01 | -1.79 | 9.64E-01 | 1.03  | 1.52E-01 |
| TRPM1         | 0.11 | 4.55E-01 | -0.73 | 7.66E-01 | -0.21 | 5.83E-01 |
| IER3IP1       | 0.11 | 4.55E-01 | 0.04  | 4.84E-01 | -0.81 | 7.90E-01 |
| OR10AD1       | 0.11 | 4.55E-01 | -0.18 | 5.71E-01 | -0.07 | 5.26E-01 |
| AZI1          | 0.11 | 4.55E-01 | -0.46 | 6.77E-01 | -0.95 | 8.28E-01 |
| KRTAP5-7      | 0.11 | 4.55E-01 | 0.13  | 4.47E-01 | -1.29 | 9.02E-01 |
| MYC           | 0.11 | 4.55E-01 | 0.38  | 3.53E-01 | -1.26 | 8.96E-01 |
| C11orf1       | 0.11 | 4.55E-01 | 0.63  | 2.66E-01 | -0.58 | 7.20E-01 |
| HSD3B7        | 0.11 | 4.56E-01 | -0.20 | 5.81E-01 | 0.65  | 2.59E-01 |
| DRD2          | 0.11 | 4.56E-01 | -0.47 | 6.81E-01 | -0.41 | 6.58E-01 |
| MSANTD3       | 0.11 | 4.56E-01 | 0.01  | 4.95E-01 | -0.88 | 8.11E-01 |
| SLC38A1       | 0.11 | 4.56E-01 | 0.05  | 4.80E-01 | 1.73  | 4.20E-02 |
| IRAK2         | 0.11 | 4.56E-01 | 0.40  | 3.44E-01 | 0.41  | 3.41E-01 |
| ACCSL         | 0.11 | 4.56E-01 | 0.18  | 4.28E-01 | -1.29 | 9.02E-01 |
| MPO           | 0.11 | 4.56E-01 | -0.26 | 6.01E-01 | -1.10 | 8.64E-01 |
| KCNB1         | 0.11 | 4.56E-01 | 0.89  | 1.88E-01 | -0.58 | 7.19E-01 |
| C21orf37      | 0.11 | 4.56E-01 | 0.05  | 4.80E-01 | -0.03 | 5.11E-01 |
| ZFPM2         | 0.11 | 4.56E-01 | -0.12 | 5.46E-01 | -0.42 | 6.64E-01 |
| CXCR2         | 0.11 | 4.56E-01 | 0.37  | 3.56E-01 | -1.49 | 9.32E-01 |
| GAPDH         | 0.11 | 4.56E-01 | 0.37  | 3.57E-01 | -1.30 | 9.03E-01 |
| STEAP3        | 0.11 | 4.56E-01 | -1.68 | 9.53E-01 | 0.86  | 1.96E-01 |
| ITGA7         | 0.11 | 4.56E-01 | 1.49  | 6.82E-02 | -0.47 | 6.81E-01 |

|          |      |          |       |          |       |          |
|----------|------|----------|-------|----------|-------|----------|
| ZNF594   | 0.11 | 4.56E-01 | 1.15  | 1.26E-01 | -1.02 | 8.46E-01 |
| TSNAX    | 0.11 | 4.56E-01 | -0.61 | 7.28E-01 | -0.64 | 7.40E-01 |
| AHSG     | 0.11 | 4.56E-01 | 0.09  | 4.64E-01 | -0.30 | 6.17E-01 |
| NQO2     | 0.11 | 4.56E-01 | -0.29 | 6.15E-01 | 0.16  | 4.38E-01 |
| PLSCR2   | 0.11 | 4.56E-01 | -0.95 | 8.29E-01 | 0.75  | 2.25E-01 |
| PTPRS    | 0.11 | 4.56E-01 | -0.44 | 6.71E-01 | 1.10  | 1.36E-01 |
| ATP6V1G1 | 0.11 | 4.56E-01 | -0.10 | 5.39E-01 | -1.09 | 8.62E-01 |
| CCNB1IP1 | 0.11 | 4.57E-01 | 0.37  | 3.54E-01 | -1.15 | 8.75E-01 |
| TNFSF18  | 0.11 | 4.57E-01 | -0.76 | 7.77E-01 | 0.11  | 4.55E-01 |
| CCDC69   | 0.11 | 4.57E-01 | -1.17 | 8.78E-01 | 0.02  | 4.93E-01 |
| CYB5A    | 0.11 | 4.57E-01 | -0.05 | 5.19E-01 | -0.95 | 8.30E-01 |
| IL10RA   | 0.11 | 4.57E-01 | 0.75  | 2.25E-01 | -3.01 | 9.99E-01 |
| ICOS     | 0.11 | 4.57E-01 | 0.43  | 3.33E-01 | -1.34 | 9.09E-01 |
| BUB1B    | 0.11 | 4.57E-01 | -0.12 | 5.49E-01 | -0.52 | 6.98E-01 |
| ATF4     | 0.11 | 4.57E-01 | 0.68  | 2.49E-01 | -1.36 | 9.14E-01 |
| GSTM4    | 0.11 | 4.57E-01 | 0.93  | 1.75E-01 | -0.15 | 5.61E-01 |
| RPS6KC1  | 0.11 | 4.57E-01 | 0.10  | 4.62E-01 | -1.12 | 8.69E-01 |
| C1orf174 | 0.11 | 4.57E-01 | -0.40 | 6.54E-01 | 0.69  | 2.45E-01 |
| C20orf85 | 0.11 | 4.57E-01 | 1.16  | 1.24E-01 | -0.25 | 5.98E-01 |
| IFITM2   | 0.11 | 4.57E-01 | -0.19 | 5.77E-01 | -0.42 | 6.63E-01 |
| ZNF524   | 0.11 | 4.57E-01 | 0.28  | 3.91E-01 | -1.26 | 8.96E-01 |
| TM7SF3   | 0.11 | 4.57E-01 | -0.33 | 6.30E-01 | -0.24 | 5.96E-01 |
| REL      | 0.11 | 4.58E-01 | 1.33  | 9.20E-02 | -1.50 | 9.33E-01 |
| EMR1     | 0.11 | 4.58E-01 | -0.71 | 7.62E-01 | -0.35 | 6.37E-01 |
| ARNTL    | 0.11 | 4.58E-01 | 2.37  | 8.85E-03 | 1.10  | 1.37E-01 |
| FLJ27365 | 0.11 | 4.58E-01 | 0.41  | 3.42E-01 | -1.60 | 9.45E-01 |
| AK5      | 0.11 | 4.58E-01 | 0.29  | 3.85E-01 | 1.87  | 3.11E-02 |
| NAA25    | 0.11 | 4.58E-01 | -0.72 | 7.64E-01 | 0.00  | 5.01E-01 |
| PNP      | 0.11 | 4.58E-01 | 0.57  | 2.85E-01 | -0.21 | 5.84E-01 |
| CRISPLD2 | 0.11 | 4.58E-01 | 0.31  | 3.76E-01 | -1.27 | 8.97E-01 |
| CXCL5    | 0.11 | 4.58E-01 | -0.07 | 5.27E-01 | -0.61 | 7.29E-01 |

|              |      |          |       |          |       |          |
|--------------|------|----------|-------|----------|-------|----------|
| UGP2         | 0.10 | 4.58E-01 | 0.03  | 4.88E-01 | -0.90 | 8.16E-01 |
| NOX3         | 0.10 | 4.59E-01 | -0.16 | 5.64E-01 | 1.04  | 1.49E-01 |
| NECAP2       | 0.10 | 4.59E-01 | -0.34 | 6.33E-01 | -0.87 | 8.09E-01 |
| ATF5         | 0.10 | 4.59E-01 | -0.89 | 8.14E-01 | 1.13  | 1.30E-01 |
| CYFIP1       | 0.10 | 4.59E-01 | 2.46  | 6.92E-03 | -0.54 | 7.05E-01 |
| INHBB        | 0.10 | 4.59E-01 | -0.55 | 7.08E-01 | -0.37 | 6.44E-01 |
| GNB2L1       | 0.10 | 4.59E-01 | 0.17  | 4.32E-01 | 1.17  | 1.22E-01 |
| ZNF865       | 0.10 | 4.59E-01 | 0.34  | 3.68E-01 | 1.41  | 7.90E-02 |
| TCTEX1D2     | 0.10 | 4.59E-01 | -1.03 | 8.48E-01 | -0.06 | 5.23E-01 |
| MKL1         | 0.10 | 4.59E-01 | 1.26  | 1.04E-01 | -1.05 | 8.52E-01 |
| ESRRB        | 0.10 | 4.59E-01 | -0.27 | 6.05E-01 | 0.53  | 2.97E-01 |
| C12orf5      | 0.10 | 4.59E-01 | 0.07  | 4.71E-01 | -1.18 | 8.81E-01 |
| MGEA5        | 0.10 | 4.59E-01 | 0.15  | 4.42E-01 | 1.15  | 1.25E-01 |
| C12orf68     | 0.10 | 4.59E-01 | -0.11 | 5.42E-01 | -0.76 | 7.76E-01 |
| RPL35        | 0.10 | 4.59E-01 | 0.15  | 4.42E-01 | -0.81 | 7.91E-01 |
| TSR1         | 0.10 | 4.59E-01 | 0.09  | 4.65E-01 | 0.21  | 4.16E-01 |
| DBX2         | 0.10 | 4.59E-01 | -0.19 | 5.74E-01 | 0.60  | 2.73E-01 |
| C6orf62      | 0.10 | 4.59E-01 | -0.20 | 5.79E-01 | -1.42 | 9.22E-01 |
| SCIN         | 0.10 | 4.59E-01 | 0.42  | 3.38E-01 | 0.22  | 4.12E-01 |
| CBFA2T2      | 0.10 | 4.59E-01 | 0.29  | 3.86E-01 | -1.23 | 8.90E-01 |
| FAM168A      | 0.10 | 4.59E-01 | -0.81 | 7.90E-01 | 0.57  | 2.85E-01 |
| ZNF784       | 0.10 | 4.59E-01 | 0.23  | 4.08E-01 | 1.95  | 2.53E-02 |
| TAS2R42      | 0.10 | 4.59E-01 | 1.34  | 8.97E-02 | -0.34 | 6.32E-01 |
| RP11-536G4.1 | 0.10 | 4.60E-01 | -0.25 | 5.99E-01 | -0.58 | 7.20E-01 |
| KCTD20       | 0.10 | 4.60E-01 | 0.82  | 2.06E-01 | 0.02  | 4.90E-01 |
| RPL34        | 0.10 | 4.60E-01 | -1.39 | 9.18E-01 | 0.45  | 3.26E-01 |
| DNAJC28      | 0.10 | 4.60E-01 | 0.04  | 4.84E-01 | -0.31 | 6.24E-01 |
| MGAT4A       | 0.10 | 4.60E-01 | 0.37  | 3.57E-01 | -0.02 | 5.10E-01 |
| CEBPE        | 0.10 | 4.60E-01 | 0.75  | 2.26E-01 | 1.34  | 9.07E-02 |
| MPZL1        | 0.10 | 4.60E-01 | -0.41 | 6.60E-01 | 1.15  | 1.25E-01 |
| CHRM5        | 0.10 | 4.60E-01 | 1.39  | 8.18E-02 | -0.56 | 7.11E-01 |

|          |      |          |       |          |       |          |
|----------|------|----------|-------|----------|-------|----------|
| HBG1     | 0.10 | 4.60E-01 | 0.20  | 4.23E-01 | -1.78 | 9.63E-01 |
| PROK2    | 0.10 | 4.60E-01 | 1.03  | 1.51E-01 | -2.46 | 9.93E-01 |
| TECPR1   | 0.10 | 4.60E-01 | 0.68  | 2.47E-01 | -0.07 | 5.29E-01 |
| PTGES2   | 0.10 | 4.60E-01 | 0.83  | 2.04E-01 | -1.47 | 9.30E-01 |
| KRT13    | 0.10 | 4.60E-01 | -1.00 | 8.40E-01 | 0.33  | 3.72E-01 |
| SOS1     | 0.10 | 4.60E-01 | 1.26  | 1.04E-01 | -0.29 | 6.15E-01 |
| OR6C1    | 0.10 | 4.60E-01 | -1.38 | 9.16E-01 | 0.27  | 3.93E-01 |
| MERTK    | 0.10 | 4.60E-01 | 0.26  | 3.98E-01 | -1.00 | 8.41E-01 |
| C8orf87  | 0.10 | 4.60E-01 | 0.80  | 2.11E-01 | -0.77 | 7.79E-01 |
| APIP     | 0.10 | 4.60E-01 | -0.34 | 6.32E-01 | 0.42  | 3.38E-01 |
| SLCO3A1  | 0.10 | 4.60E-01 | -1.00 | 8.41E-01 | -0.62 | 7.32E-01 |
| CCT8     | 0.10 | 4.60E-01 | 0.59  | 2.79E-01 | -1.15 | 8.75E-01 |
| ACTR1B   | 0.10 | 4.61E-01 | -0.31 | 6.22E-01 | -0.60 | 7.25E-01 |
| CHRNA2   | 0.10 | 4.61E-01 | 1.21  | 1.14E-01 | 0.91  | 1.80E-01 |
| MTHFS    | 0.10 | 4.61E-01 | -0.35 | 6.36E-01 | -0.87 | 8.09E-01 |
| LRRC15   | 0.10 | 4.61E-01 | -0.41 | 6.59E-01 | 0.47  | 3.17E-01 |
| STK38    | 0.10 | 4.61E-01 | 1.04  | 1.49E-01 | -0.10 | 5.41E-01 |
| AQP1     | 0.10 | 4.61E-01 | 0.94  | 1.74E-01 | -0.53 | 7.03E-01 |
| MDK      | 0.10 | 4.61E-01 | -0.96 | 8.30E-01 | 0.30  | 3.82E-01 |
| CCDC181  | 0.10 | 4.61E-01 | 0.67  | 2.51E-01 | 0.91  | 1.82E-01 |
| PRSS48   | 0.10 | 4.61E-01 | -0.76 | 7.76E-01 | -0.38 | 6.47E-01 |
| CHCHD4   | 0.10 | 4.61E-01 | -0.63 | 7.36E-01 | 0.39  | 3.47E-01 |
| TMEM11   | 0.10 | 4.61E-01 | -0.25 | 6.01E-01 | -0.81 | 7.90E-01 |
| CR2      | 0.10 | 4.61E-01 | 0.76  | 2.24E-01 | -1.13 | 8.71E-01 |
| STIP1    | 0.10 | 4.61E-01 | 1.01  | 1.57E-01 | 0.29  | 3.86E-01 |
| KIAA0430 | 0.10 | 4.61E-01 | -0.32 | 6.27E-01 | 1.92  | 2.77E-02 |
| RGSL1    | 0.10 | 4.61E-01 | -0.75 | 7.72E-01 | 1.52  | 6.47E-02 |
| C7orf26  | 0.10 | 4.61E-01 | -1.10 | 8.64E-01 | 0.66  | 2.53E-01 |
| DCP2     | 0.10 | 4.62E-01 | -1.23 | 8.90E-01 | 1.53  | 6.34E-02 |
| C4orf26  | 0.10 | 4.62E-01 | 0.15  | 4.39E-01 | 1.04  | 1.50E-01 |
| TCF25    | 0.10 | 4.62E-01 | 0.35  | 3.65E-01 | 1.20  | 1.15E-01 |

|          |      |          |       |          |       |          |
|----------|------|----------|-------|----------|-------|----------|
| 43165    | 0.10 | 4.62E-01 | -0.35 | 6.37E-01 | -0.47 | 6.80E-01 |
| SGCG     | 0.10 | 4.62E-01 | 0.77  | 2.21E-01 | 0.17  | 4.33E-01 |
| C17orf97 | 0.10 | 4.62E-01 | -0.87 | 8.07E-01 | -0.10 | 5.38E-01 |
| DSE      | 0.10 | 4.62E-01 | 1.23  | 1.09E-01 | -1.14 | 8.72E-01 |
| FST      | 0.10 | 4.62E-01 | -0.03 | 5.11E-01 | 0.98  | 1.64E-01 |
| MBOAT1   | 0.10 | 4.62E-01 | 0.96  | 1.67E-01 | -0.21 | 5.81E-01 |
| TAPBPL   | 0.10 | 4.62E-01 | 0.79  | 2.15E-01 | -0.32 | 6.25E-01 |
| CISD2    | 0.10 | 4.62E-01 | -0.05 | 5.21E-01 | -0.32 | 6.27E-01 |
| OR51H1P  | 0.10 | 4.62E-01 | 0.87  | 1.93E-01 | -1.15 | 8.75E-01 |
| ADIG     | 0.10 | 4.62E-01 | 0.41  | 3.43E-01 | 0.47  | 3.18E-01 |
| FOXB1    | 0.10 | 4.62E-01 | -0.60 | 7.26E-01 | -0.34 | 6.34E-01 |
| PPM1B    | 0.10 | 4.62E-01 | -0.21 | 5.81E-01 | 0.46  | 3.24E-01 |
| CACHD1   | 0.10 | 4.62E-01 | 0.72  | 2.37E-01 | -0.04 | 5.15E-01 |
| CNTN2    | 0.09 | 4.62E-01 | 0.23  | 4.10E-01 | -0.50 | 6.91E-01 |
| PLEKHO2  | 0.09 | 4.62E-01 | -0.58 | 7.19E-01 | 0.63  | 2.63E-01 |
| LDHAL6A  | 0.09 | 4.62E-01 | -1.15 | 8.75E-01 | 0.18  | 4.29E-01 |
| POLB     | 0.09 | 4.62E-01 | 0.00  | 5.01E-01 | -0.82 | 7.94E-01 |
| VWA8     | 0.09 | 4.62E-01 | 0.72  | 2.37E-01 | -0.57 | 7.16E-01 |
| PYROXD1  | 0.09 | 4.62E-01 | -0.25 | 5.99E-01 | -0.76 | 7.76E-01 |
| KCNU1    | 0.09 | 4.62E-01 | 0.78  | 2.17E-01 | -1.12 | 8.68E-01 |
| MPHOSPH6 | 0.09 | 4.62E-01 | 0.51  | 3.06E-01 | 0.37  | 3.55E-01 |
| PAPPA2   | 0.09 | 4.62E-01 | 0.64  | 2.62E-01 | 1.08  | 1.41E-01 |
| GRK5     | 0.09 | 4.62E-01 | 0.27  | 3.93E-01 | -1.28 | 9.00E-01 |
| SNX17    | 0.09 | 4.62E-01 | 0.18  | 4.30E-01 | 1.44  | 7.51E-02 |
| LUZP1    | 0.09 | 4.63E-01 | 1.50  | 6.65E-02 | 0.02  | 4.90E-01 |
| GNAI3    | 0.09 | 4.63E-01 | 0.69  | 2.47E-01 | -0.74 | 7.72E-01 |
| EIF2B2   | 0.09 | 4.63E-01 | 0.95  | 1.70E-01 | -0.58 | 7.20E-01 |
| FARS2    | 0.09 | 4.63E-01 | 0.27  | 3.93E-01 | -0.40 | 6.54E-01 |
| TTR      | 0.09 | 4.63E-01 | 0.32  | 3.73E-01 | -1.33 | 9.09E-01 |
| C17orf98 | 0.09 | 4.63E-01 | 0.39  | 3.47E-01 | -0.17 | 5.68E-01 |
| EMID1    | 0.09 | 4.63E-01 | 0.08  | 4.67E-01 | -0.86 | 8.05E-01 |



|            |      |          |       |          |       |          |
|------------|------|----------|-------|----------|-------|----------|
| MMP26      | 0.09 | 4.63E-01 | 0.09  | 4.65E-01 | 0.71  | 2.39E-01 |
| ENSA       | 0.09 | 4.63E-01 | -0.72 | 7.65E-01 | -0.18 | 5.73E-01 |
| RBMXL1     | 0.09 | 4.63E-01 | -0.94 | 8.26E-01 | 0.49  | 3.12E-01 |
| FDX1L      | 0.09 | 4.63E-01 | -1.07 | 8.58E-01 | 0.54  | 2.93E-01 |
| ADAM32     | 0.09 | 4.64E-01 | 0.69  | 2.44E-01 | -0.56 | 7.11E-01 |
| NBL1       | 0.09 | 4.64E-01 | -0.15 | 5.59E-01 | -0.89 | 8.12E-01 |
| ATP8A2     | 0.09 | 4.64E-01 | 0.97  | 1.65E-01 | -1.10 | 8.64E-01 |
| CWC15      | 0.09 | 4.64E-01 | 0.76  | 2.23E-01 | 1.12  | 1.31E-01 |
| NUCKS1     | 0.09 | 4.64E-01 | -1.36 | 9.13E-01 | 0.05  | 4.80E-01 |
| KIAA1551   | 0.09 | 4.64E-01 | -2.05 | 9.80E-01 | 0.59  | 2.77E-01 |
| KLHL29     | 0.09 | 4.64E-01 | 1.61  | 5.42E-02 | 1.41  | 7.86E-02 |
| CNTN1      | 0.09 | 4.64E-01 | 0.22  | 4.15E-01 | -1.14 | 8.73E-01 |
| C17orf70   | 0.09 | 4.64E-01 | -0.38 | 6.49E-01 | -0.10 | 5.39E-01 |
| RPL36      | 0.09 | 4.64E-01 | -0.04 | 5.16E-01 | 0.51  | 3.07E-01 |
| ZNF510     | 0.09 | 4.64E-01 | -1.11 | 8.67E-01 | 0.62  | 2.67E-01 |
| TRNP1      | 0.09 | 4.64E-01 | -0.03 | 5.10E-01 | 1.44  | 7.45E-02 |
| AC009403.2 | 0.09 | 4.64E-01 | -0.85 | 8.03E-01 | -0.04 | 5.15E-01 |
| GLRX       | 0.09 | 4.64E-01 | -0.87 | 8.07E-01 | -0.12 | 5.48E-01 |
| C1orf101   | 0.09 | 4.64E-01 | -0.37 | 6.43E-01 | -0.78 | 7.84E-01 |
| AMACR      | 0.09 | 4.64E-01 | 1.61  | 5.43E-02 | 0.22  | 4.14E-01 |
| LHCGR      | 0.09 | 4.64E-01 | 0.00  | 4.99E-01 | -1.10 | 8.65E-01 |
| TSSK6      | 0.09 | 4.65E-01 | -0.59 | 7.23E-01 | -0.54 | 7.06E-01 |
| CHST10     | 0.09 | 4.65E-01 | 0.30  | 3.84E-01 | -0.18 | 5.72E-01 |
| ALDH18A1   | 0.09 | 4.65E-01 | -0.55 | 7.08E-01 | 0.91  | 1.82E-01 |
| C5orf45    | 0.09 | 4.65E-01 | 0.22  | 4.13E-01 | -1.05 | 8.53E-01 |
| CHST2      | 0.09 | 4.65E-01 | 0.30  | 3.83E-01 | -1.06 | 8.55E-01 |
| ZNF598     | 0.09 | 4.65E-01 | 0.86  | 1.96E-01 | -0.42 | 6.63E-01 |
| OR13A1     | 0.09 | 4.65E-01 | -0.67 | 7.48E-01 | 0.51  | 3.04E-01 |
| TMEM41A    | 0.09 | 4.65E-01 | 0.30  | 3.83E-01 | -0.91 | 8.18E-01 |
| RNF31      | 0.09 | 4.65E-01 | -1.80 | 9.64E-01 | 0.71  | 2.38E-01 |
| ANKRD22    | 0.09 | 4.65E-01 | -0.79 | 7.86E-01 | 0.34  | 3.65E-01 |

|          |      |          |       |          |       |          |
|----------|------|----------|-------|----------|-------|----------|
| CPT1A    | 0.09 | 4.65E-01 | -0.45 | 6.73E-01 | -0.59 | 7.23E-01 |
| RPUSD1   | 0.09 | 4.65E-01 | 0.74  | 2.30E-01 | -0.71 | 7.60E-01 |
| FGF18    | 0.09 | 4.65E-01 | 1.51  | 6.55E-02 | 0.64  | 2.62E-01 |
| RAB32    | 0.09 | 4.65E-01 | 1.02  | 1.54E-01 | -1.06 | 8.55E-01 |
| BACH1    | 0.09 | 4.65E-01 | 0.31  | 3.79E-01 | -1.86 | 9.69E-01 |
| EID2B    | 0.09 | 4.65E-01 | 0.21  | 4.17E-01 | -1.11 | 8.67E-01 |
| SCAMP5   | 0.09 | 4.66E-01 | 0.04  | 4.85E-01 | 0.40  | 3.44E-01 |
| TMEM43   | 0.09 | 4.66E-01 | -0.22 | 5.88E-01 | -0.13 | 5.53E-01 |
| C16orf91 | 0.09 | 4.66E-01 | 0.02  | 4.92E-01 | -0.29 | 6.14E-01 |
| TRIM55   | 0.09 | 4.66E-01 | 0.10  | 4.59E-01 | -0.15 | 5.59E-01 |
| PRKAR2B  | 0.09 | 4.66E-01 | -0.26 | 6.03E-01 | 1.12  | 1.31E-01 |
| CKAP4    | 0.09 | 4.66E-01 | 0.69  | 2.47E-01 | -1.34 | 9.10E-01 |
| ARHGAP12 | 0.09 | 4.66E-01 | -0.09 | 5.35E-01 | -0.29 | 6.12E-01 |
| TMEM140  | 0.09 | 4.66E-01 | -1.08 | 8.59E-01 | 1.02  | 1.53E-01 |
| NUP50    | 0.08 | 4.66E-01 | -0.27 | 6.07E-01 | 1.32  | 9.27E-02 |
| GFRA4    | 0.08 | 4.66E-01 | 0.60  | 2.73E-01 | -0.29 | 6.16E-01 |
| RBMS2    | 0.08 | 4.66E-01 | 0.47  | 3.20E-01 | -1.82 | 9.65E-01 |
| SIMC1    | 0.08 | 4.66E-01 | -0.74 | 7.69E-01 | -0.67 | 7.50E-01 |
| EFCAB10  | 0.08 | 4.66E-01 | 0.28  | 3.89E-01 | 0.62  | 2.69E-01 |
| GGH      | 0.08 | 4.66E-01 | 0.13  | 4.48E-01 | 0.54  | 2.95E-01 |
| TMEM108  | 0.08 | 4.66E-01 | 0.89  | 1.88E-01 | 0.04  | 4.85E-01 |
| RPN1     | 0.08 | 4.66E-01 | 0.70  | 2.42E-01 | -1.82 | 9.66E-01 |
| ELMO3    | 0.08 | 4.66E-01 | -0.84 | 7.98E-01 | -0.58 | 7.20E-01 |
| RASL10A  | 0.08 | 4.66E-01 | 0.19  | 4.25E-01 | -0.92 | 8.21E-01 |
| FAT3     | 0.08 | 4.66E-01 | 0.01  | 4.97E-01 | -0.47 | 6.81E-01 |
| DOK4     | 0.08 | 4.67E-01 | -0.42 | 6.62E-01 | -0.67 | 7.49E-01 |
| DIEXF    | 0.08 | 4.67E-01 | -0.91 | 8.18E-01 | -0.30 | 6.18E-01 |
| VAV3     | 0.08 | 4.67E-01 | -0.59 | 7.22E-01 | 0.19  | 4.25E-01 |
| DYNC2LI1 | 0.08 | 4.67E-01 | 0.68  | 2.49E-01 | -0.60 | 7.25E-01 |
| SLC26A10 | 0.08 | 4.67E-01 | -0.96 | 8.32E-01 | -0.13 | 5.52E-01 |
| ANKRD36  | 0.08 | 4.67E-01 | -0.94 | 8.27E-01 | 0.21  | 4.17E-01 |

|           |      |          |       |          |       |          |
|-----------|------|----------|-------|----------|-------|----------|
| WRNIP1    | 0.08 | 4.67E-01 | 0.11  | 4.57E-01 | -1.06 | 8.55E-01 |
| BLOC1S6   | 0.08 | 4.67E-01 | -0.78 | 7.82E-01 | 0.31  | 3.79E-01 |
| KRTAP10-6 | 0.08 | 4.67E-01 | -0.01 | 5.05E-01 | 1.75  | 4.01E-02 |
| TM7SF2    | 0.08 | 4.67E-01 | 0.76  | 2.24E-01 | -0.55 | 7.09E-01 |
| ROR1      | 0.08 | 4.67E-01 | 0.35  | 3.65E-01 | 0.24  | 4.05E-01 |
| C11orf48  | 0.08 | 4.67E-01 | -0.65 | 7.42E-01 | 0.02  | 4.90E-01 |
| CCDC168   | 0.08 | 4.67E-01 | 1.07  | 1.41E-01 | -0.96 | 8.31E-01 |
| TRIM69    | 0.08 | 4.67E-01 | -0.10 | 5.40E-01 | -1.24 | 8.92E-01 |
| GDF3      | 0.08 | 4.67E-01 | -0.25 | 5.99E-01 | -0.57 | 7.16E-01 |
| FSCB      | 0.08 | 4.67E-01 | 0.12  | 4.53E-01 | -0.53 | 7.02E-01 |
| RARRES2   | 0.08 | 4.67E-01 | -1.15 | 8.76E-01 | 0.20  | 4.21E-01 |
| NXNL1     | 0.08 | 4.67E-01 | 0.39  | 3.49E-01 | 0.62  | 2.66E-01 |
| CENPQ     | 0.08 | 4.68E-01 | -0.87 | 8.07E-01 | 0.40  | 3.45E-01 |
| ATPIF1    | 0.08 | 4.68E-01 | -0.76 | 7.76E-01 | 1.01  | 1.56E-01 |
| MYO15A    | 0.08 | 4.68E-01 | 0.10  | 4.59E-01 | 0.07  | 4.73E-01 |
| PAPD5     | 0.08 | 4.68E-01 | 0.03  | 4.86E-01 | 0.28  | 3.89E-01 |
| IL17RB    | 0.08 | 4.68E-01 | -0.32 | 6.27E-01 | -0.01 | 5.06E-01 |
| NR2C2AP   | 0.08 | 4.68E-01 | 0.51  | 3.07E-01 | -1.32 | 9.07E-01 |
| PLEKHG1   | 0.08 | 4.68E-01 | 0.55  | 2.93E-01 | 0.48  | 3.14E-01 |
| HSPA4     | 0.08 | 4.68E-01 | 0.34  | 3.66E-01 | -1.12 | 8.69E-01 |
| THRB      | 0.08 | 4.68E-01 | -0.10 | 5.39E-01 | 1.71  | 4.35E-02 |
| FBXO11    | 0.08 | 4.68E-01 | 0.49  | 3.12E-01 | -1.14 | 8.72E-01 |
| HHIP      | 0.08 | 4.68E-01 | -0.85 | 8.01E-01 | 0.06  | 4.74E-01 |
| MED9      | 0.08 | 4.68E-01 | 0.31  | 3.80E-01 | -0.72 | 7.63E-01 |
| UBASH3A   | 0.08 | 4.68E-01 | -1.89 | 9.71E-01 | 0.09  | 4.62E-01 |
| CHADL     | 0.08 | 4.68E-01 | -0.14 | 5.57E-01 | -0.72 | 7.66E-01 |
| CORO1B    | 0.08 | 4.68E-01 | 1.00  | 1.59E-01 | -0.58 | 7.18E-01 |
| UBE2V1    | 0.08 | 4.68E-01 | -0.63 | 7.36E-01 | 0.38  | 3.50E-01 |
| RAB11FIP2 | 0.08 | 4.68E-01 | -0.92 | 8.22E-01 | 0.14  | 4.43E-01 |
| FOXI2     | 0.08 | 4.68E-01 | -0.35 | 6.38E-01 | 0.09  | 4.64E-01 |
| OR7A5     | 0.08 | 4.68E-01 | -0.56 | 7.13E-01 | 1.88  | 3.03E-02 |

|          |      |          |       |          |       |          |
|----------|------|----------|-------|----------|-------|----------|
| XRN1     | 0.08 | 4.68E-01 | 0.14  | 4.45E-01 | -0.92 | 8.21E-01 |
| IMPAD1   | 0.08 | 4.69E-01 | 0.30  | 3.84E-01 | -0.91 | 8.19E-01 |
| SLC9A4   | 0.08 | 4.69E-01 | 0.54  | 2.95E-01 | -2.68 | 9.96E-01 |
| AKAP5    | 0.08 | 4.69E-01 | 0.19  | 4.26E-01 | -0.36 | 6.42E-01 |
| SIK2     | 0.08 | 4.69E-01 | 0.89  | 1.87E-01 | 0.08  | 4.66E-01 |
| RAD51    | 0.08 | 4.69E-01 | 0.22  | 4.13E-01 | -0.84 | 7.98E-01 |
| ADRBK2   | 0.08 | 4.69E-01 | -1.39 | 9.17E-01 | 0.59  | 2.77E-01 |
| ANKLE1   | 0.08 | 4.69E-01 | 0.18  | 4.30E-01 | -0.70 | 7.57E-01 |
| ATF1     | 0.08 | 4.69E-01 | 0.43  | 3.35E-01 | -0.52 | 6.98E-01 |
| TRAPPC2L | 0.08 | 4.69E-01 | -0.15 | 5.59E-01 | -0.11 | 5.44E-01 |
| CDH4     | 0.08 | 4.69E-01 | -0.78 | 7.84E-01 | -0.09 | 5.35E-01 |
| CRELD2   | 0.08 | 4.69E-01 | 0.85  | 1.98E-01 | -1.60 | 9.45E-01 |
| EFCAB6   | 0.08 | 4.69E-01 | 1.00  | 1.58E-01 | -0.43 | 6.67E-01 |
| SEMA6D   | 0.08 | 4.69E-01 | 1.82  | 3.43E-02 | -1.58 | 9.43E-01 |
| POP7     | 0.08 | 4.69E-01 | -0.91 | 8.18E-01 | 1.00  | 1.59E-01 |
| DDX49    | 0.08 | 4.69E-01 | 0.29  | 3.87E-01 | -0.04 | 5.17E-01 |
| TMEM229A | 0.08 | 4.69E-01 | -0.02 | 5.08E-01 | 0.37  | 3.57E-01 |
| FOSL2    | 0.08 | 4.69E-01 | 0.97  | 1.66E-01 | -0.85 | 8.02E-01 |
| DNAJA2   | 0.08 | 4.69E-01 | -1.28 | 8.99E-01 | 1.23  | 1.09E-01 |
| LIN7B    | 0.08 | 4.69E-01 | 1.17  | 1.21E-01 | -1.15 | 8.75E-01 |
| SIVA1    | 0.08 | 4.69E-01 | -0.32 | 6.27E-01 | -0.25 | 5.99E-01 |
| PIEZO2   | 0.08 | 4.69E-01 | -0.02 | 5.08E-01 | -1.04 | 8.52E-01 |
| UBE2U    | 0.08 | 4.70E-01 | 0.63  | 2.65E-01 | -1.85 | 9.68E-01 |
| PYCRL    | 0.08 | 4.70E-01 | -0.16 | 5.65E-01 | 0.23  | 4.07E-01 |
| CBY3     | 0.08 | 4.70E-01 | 0.42  | 3.37E-01 | -1.91 | 9.72E-01 |
| ARHGAP24 | 0.08 | 4.70E-01 | -0.81 | 7.91E-01 | 0.55  | 2.91E-01 |
| TRIP12   | 0.08 | 4.70E-01 | -0.40 | 6.57E-01 | -0.32 | 6.26E-01 |
| SLC44A2  | 0.08 | 4.70E-01 | -0.55 | 7.10E-01 | -0.37 | 6.43E-01 |
| RAB33B   | 0.08 | 4.70E-01 | 0.67  | 2.50E-01 | -1.49 | 9.32E-01 |
| ZCCHC3   | 0.08 | 4.70E-01 | 0.19  | 4.23E-01 | -1.14 | 8.73E-01 |
| TXNDC17  | 0.08 | 4.70E-01 | 1.59  | 5.62E-02 | -0.46 | 6.79E-01 |

|                 |      |          |       |          |       |          |
|-----------------|------|----------|-------|----------|-------|----------|
| ZNF416          | 0.08 | 4.70E-01 | 0.52  | 3.00E-01 | -1.39 | 9.17E-01 |
| DUSP1           | 0.08 | 4.70E-01 | 0.38  | 3.50E-01 | 0.02  | 4.92E-01 |
| BAI1            | 0.07 | 4.70E-01 | -0.54 | 7.04E-01 | 2.21  | 1.36E-02 |
| DUSP15          | 0.07 | 4.70E-01 | 0.04  | 4.84E-01 | 0.64  | 2.62E-01 |
| TNFSF12         | 0.07 | 4.70E-01 | 0.50  | 3.07E-01 | 0.91  | 1.82E-01 |
| TNFSF12-TNFSF13 | 0.07 | 4.70E-01 | 0.50  | 3.07E-01 | 0.91  | 1.82E-01 |
| IGFBP7          | 0.07 | 4.70E-01 | 0.80  | 2.13E-01 | 0.02  | 4.93E-01 |
| LMNB2           | 0.07 | 4.70E-01 | -0.09 | 5.38E-01 | -0.90 | 8.17E-01 |
| CCDC43          | 0.07 | 4.70E-01 | 1.65  | 4.95E-02 | 0.05  | 4.81E-01 |
| ATP5A1          | 0.07 | 4.70E-01 | -0.32 | 6.25E-01 | 0.20  | 4.20E-01 |
| C2CD5           | 0.07 | 4.70E-01 | 0.68  | 2.47E-01 | -0.52 | 7.00E-01 |
| RHBG            | 0.07 | 4.70E-01 | -1.00 | 8.40E-01 | 1.30  | 9.62E-02 |
| GSG2            | 0.07 | 4.71E-01 | 0.64  | 2.62E-01 | -0.07 | 5.29E-01 |
| FBXL14          | 0.07 | 4.71E-01 | 0.47  | 3.21E-01 | -1.35 | 9.11E-01 |
| XPNPEP3         | 0.07 | 4.71E-01 | 0.62  | 2.67E-01 | 0.29  | 3.87E-01 |
| MMP8            | 0.07 | 4.71E-01 | 1.15  | 1.24E-01 | 0.19  | 4.24E-01 |
| BMP2K           | 0.07 | 4.71E-01 | 1.21  | 1.13E-01 | -0.17 | 5.67E-01 |
| EBNA1BP2        | 0.07 | 4.71E-01 | 1.85  | 3.23E-02 | -1.19 | 8.83E-01 |
| TOR1B           | 0.07 | 4.71E-01 | -0.39 | 6.51E-01 | 1.11  | 1.33E-01 |
| CYB561D2        | 0.07 | 4.71E-01 | 0.98  | 1.64E-01 | -0.49 | 6.89E-01 |
| SIPA1L2         | 0.07 | 4.71E-01 | -0.25 | 5.99E-01 | 0.41  | 3.40E-01 |
| FKBP5           | 0.07 | 4.71E-01 | -0.80 | 7.87E-01 | 0.36  | 3.60E-01 |
| MEGF10          | 0.07 | 4.71E-01 | 1.60  | 5.48E-02 | 0.04  | 4.83E-01 |
| VNN2            | 0.07 | 4.71E-01 | -0.28 | 6.12E-01 | 0.37  | 3.55E-01 |
| C12orf23        | 0.07 | 4.71E-01 | -0.33 | 6.30E-01 | -0.45 | 6.73E-01 |
| MMP28           | 0.07 | 4.71E-01 | -0.64 | 7.40E-01 | 0.14  | 4.45E-01 |
| CWC25           | 0.07 | 4.71E-01 | 1.06  | 1.44E-01 | -0.98 | 8.36E-01 |
| CTF1            | 0.07 | 4.71E-01 | -0.62 | 7.34E-01 | 0.52  | 3.02E-01 |
| KHDRBS1         | 0.07 | 4.72E-01 | -0.80 | 7.88E-01 | -0.20 | 5.81E-01 |
| C1orf226        | 0.07 | 4.72E-01 | -0.78 | 7.81E-01 | 0.17  | 4.34E-01 |
| KRTAP6-3        | 0.07 | 4.72E-01 | -0.57 | 7.15E-01 | 0.33  | 3.69E-01 |

|           |      |          |       |          |       |          |
|-----------|------|----------|-------|----------|-------|----------|
| PRR13     | 0.07 | 4.72E-01 | -2.09 | 9.82E-01 | 0.60  | 2.75E-01 |
| EZH2      | 0.07 | 4.72E-01 | -1.54 | 9.38E-01 | 0.86  | 1.94E-01 |
| MND1      | 0.07 | 4.72E-01 | -0.29 | 6.14E-01 | 0.74  | 2.28E-01 |
| ZNF516    | 0.07 | 4.72E-01 | 1.41  | 7.94E-02 | -0.56 | 7.13E-01 |
| FGA       | 0.07 | 4.72E-01 | 0.31  | 3.80E-01 | -0.63 | 7.35E-01 |
| OLAH      | 0.07 | 4.72E-01 | 1.76  | 3.94E-02 | -1.52 | 9.36E-01 |
| ADAM30    | 0.07 | 4.72E-01 | 0.81  | 2.09E-01 | -0.16 | 5.64E-01 |
| SEC61A2   | 0.07 | 4.72E-01 | 0.58  | 2.82E-01 | 0.83  | 2.05E-01 |
| LCAT      | 0.07 | 4.72E-01 | -0.67 | 7.49E-01 | 1.09  | 1.37E-01 |
| PHYHD1    | 0.07 | 4.72E-01 | -1.08 | 8.60E-01 | 0.35  | 3.63E-01 |
| PAPD7     | 0.07 | 4.72E-01 | -0.78 | 7.82E-01 | 0.53  | 2.99E-01 |
| MUL1      | 0.07 | 4.73E-01 | -0.75 | 7.74E-01 | 0.53  | 2.98E-01 |
| TMEM59    | 0.07 | 4.73E-01 | 0.39  | 3.49E-01 | 0.71  | 2.38E-01 |
| TTC28     | 0.07 | 4.73E-01 | 1.55  | 6.07E-02 | -0.53 | 7.01E-01 |
| TRAT1     | 0.07 | 4.73E-01 | 0.69  | 2.47E-01 | -0.68 | 7.51E-01 |
| CSRNP1    | 0.07 | 4.73E-01 | -0.37 | 6.43E-01 | 0.12  | 4.54E-01 |
| LRRIQ1    | 0.07 | 4.73E-01 | -0.90 | 8.15E-01 | -0.04 | 5.17E-01 |
| CAT       | 0.07 | 4.73E-01 | -0.56 | 7.12E-01 | -0.69 | 7.53E-01 |
| CHI3L2    | 0.07 | 4.73E-01 | 0.14  | 4.44E-01 | -1.02 | 8.47E-01 |
| YY1       | 0.07 | 4.73E-01 | -0.22 | 5.87E-01 | -0.47 | 6.79E-01 |
| CLEC2L    | 0.07 | 4.73E-01 | -0.61 | 7.30E-01 | 0.93  | 1.75E-01 |
| TH        | 0.07 | 4.73E-01 | -0.11 | 5.44E-01 | -0.90 | 8.15E-01 |
| ERC1      | 0.07 | 4.73E-01 | -1.34 | 9.10E-01 | 0.36  | 3.59E-01 |
| RELT      | 0.07 | 4.73E-01 | -1.33 | 9.08E-01 | 0.93  | 1.76E-01 |
| GNPAT     | 0.07 | 4.73E-01 | 0.95  | 1.72E-01 | -0.23 | 5.91E-01 |
| MR1       | 0.07 | 4.74E-01 | 0.47  | 3.20E-01 | 0.61  | 2.70E-01 |
| FAM228A   | 0.07 | 4.74E-01 | -0.89 | 8.13E-01 | 0.13  | 4.47E-01 |
| PAPPA-AS1 | 0.07 | 4.74E-01 | -0.85 | 8.01E-01 | 0.62  | 2.66E-01 |
| NDFIP1    | 0.07 | 4.74E-01 | 0.54  | 2.94E-01 | -1.88 | 9.70E-01 |
| PRR5L     | 0.07 | 4.74E-01 | 0.51  | 3.07E-01 | 0.64  | 2.63E-01 |
| ERAP1     | 0.07 | 4.74E-01 | 0.34  | 3.66E-01 | 0.59  | 2.79E-01 |

|          |      |          |       |          |       |          |
|----------|------|----------|-------|----------|-------|----------|
| C15orf56 | 0.07 | 4.74E-01 | 0.00  | 4.98E-01 | -0.65 | 7.43E-01 |
| TMEM87B  | 0.07 | 4.74E-01 | -0.50 | 6.90E-01 | 0.41  | 3.39E-01 |
| WDR48    | 0.07 | 4.74E-01 | -0.18 | 5.71E-01 | 0.94  | 1.73E-01 |
| CYP2C9   | 0.07 | 4.74E-01 | 1.18  | 1.20E-01 | 0.26  | 3.96E-01 |
| CAMSAP1  | 0.07 | 4.74E-01 | -0.44 | 6.70E-01 | 1.27  | 1.02E-01 |
| NAT2     | 0.06 | 4.74E-01 | -0.44 | 6.69E-01 | -0.52 | 7.00E-01 |
| NCALD    | 0.06 | 4.74E-01 | -0.93 | 8.25E-01 | -0.01 | 5.03E-01 |
| KLHL23   | 0.06 | 4.74E-01 | -0.32 | 6.26E-01 | 1.13  | 1.30E-01 |
| PRPF19   | 0.06 | 4.74E-01 | -0.85 | 8.01E-01 | 0.22  | 4.12E-01 |
| TMCO6    | 0.06 | 4.74E-01 | -0.82 | 7.95E-01 | -0.14 | 5.57E-01 |
| ONECUT2  | 0.06 | 4.74E-01 | -1.44 | 9.25E-01 | 1.09  | 1.38E-01 |
| MMP27    | 0.06 | 4.74E-01 | 0.49  | 3.11E-01 | -0.49 | 6.88E-01 |
| ADPRM    | 0.06 | 4.74E-01 | 0.82  | 2.06E-01 | -0.66 | 7.44E-01 |
| WDR45B   | 0.06 | 4.74E-01 | -1.27 | 8.99E-01 | 0.24  | 4.05E-01 |
| SULT1B1  | 0.06 | 4.75E-01 | -1.14 | 8.73E-01 | 0.09  | 4.63E-01 |
| CALR     | 0.06 | 4.75E-01 | 0.03  | 4.88E-01 | 0.12  | 4.52E-01 |
| RPS15    | 0.06 | 4.75E-01 | -1.78 | 9.63E-01 | 0.69  | 2.44E-01 |
| PARP3    | 0.06 | 4.75E-01 | -0.67 | 7.50E-01 | -0.31 | 6.22E-01 |
| C2orf88  | 0.06 | 4.75E-01 | 0.10  | 4.59E-01 | -0.33 | 6.31E-01 |
| EYA1     | 0.06 | 4.75E-01 | -1.10 | 8.64E-01 | -0.18 | 5.70E-01 |
| FBXL15   | 0.06 | 4.75E-01 | 0.48  | 3.15E-01 | 1.34  | 9.06E-02 |
| PRKACG   | 0.06 | 4.75E-01 | -0.28 | 6.09E-01 | -0.06 | 5.26E-01 |
| GAPVD1   | 0.06 | 4.75E-01 | 1.05  | 1.47E-01 | -0.32 | 6.25E-01 |
| SMIM14   | 0.06 | 4.75E-01 | -1.19 | 8.83E-01 | 0.22  | 4.14E-01 |
| CPS1     | 0.06 | 4.75E-01 | 0.63  | 2.65E-01 | -1.84 | 9.67E-01 |
| MED18    | 0.06 | 4.75E-01 | 0.36  | 3.59E-01 | -0.24 | 5.96E-01 |
| CYTH3    | 0.06 | 4.75E-01 | -0.71 | 7.63E-01 | -0.22 | 5.88E-01 |
| XPNPEP1  | 0.06 | 4.75E-01 | 1.48  | 6.88E-02 | 1.58  | 5.75E-02 |
| WNT6     | 0.06 | 4.75E-01 | 2.28  | 1.13E-02 | 1.27  | 1.02E-01 |
| PIEZO1   | 0.06 | 4.75E-01 | 0.41  | 3.39E-01 | 1.26  | 1.03E-01 |
| DLL3     | 0.06 | 4.75E-01 | -0.83 | 7.98E-01 | 1.03  | 1.52E-01 |

|          |      |          |       |          |       |          |
|----------|------|----------|-------|----------|-------|----------|
| DOK3     | 0.06 | 4.75E-01 | -0.44 | 6.71E-01 | -0.70 | 7.58E-01 |
| STAT2    | 0.06 | 4.75E-01 | 0.32  | 3.73E-01 | 1.49  | 6.81E-02 |
| FARSB    | 0.06 | 4.76E-01 | 1.34  | 9.05E-02 | 1.21  | 1.13E-01 |
| KRT33A   | 0.06 | 4.76E-01 | 0.34  | 3.68E-01 | -1.13 | 8.70E-01 |
| ADAMTS8  | 0.06 | 4.76E-01 | -0.44 | 6.70E-01 | 0.54  | 2.96E-01 |
| TRIM17   | 0.06 | 4.76E-01 | -0.05 | 5.20E-01 | 1.95  | 2.55E-02 |
| MXD3     | 0.06 | 4.76E-01 | 0.63  | 2.63E-01 | -0.95 | 8.30E-01 |
| HPS5     | 0.06 | 4.76E-01 | -0.08 | 5.30E-01 | 1.00  | 1.58E-01 |
| PPP1R3B  | 0.06 | 4.76E-01 | 0.18  | 4.29E-01 | -1.19 | 8.84E-01 |
| ADD3     | 0.06 | 4.76E-01 | 1.16  | 1.23E-01 | 1.80  | 3.60E-02 |
| FAM210B  | 0.06 | 4.76E-01 | -0.12 | 5.47E-01 | -0.34 | 6.31E-01 |
| ATP5J    | 0.06 | 4.76E-01 | -0.92 | 8.20E-01 | 0.78  | 2.18E-01 |
| COLCA2   | 0.06 | 4.76E-01 | 0.70  | 2.42E-01 | 1.16  | 1.23E-01 |
| RNGTT    | 0.06 | 4.76E-01 | -0.03 | 5.13E-01 | -0.75 | 7.74E-01 |
| FLII     | 0.06 | 4.76E-01 | 0.26  | 3.96E-01 | -0.79 | 7.86E-01 |
| NUDT7    | 0.06 | 4.76E-01 | -1.15 | 8.75E-01 | 0.41  | 3.42E-01 |
| SPOCK1   | 0.06 | 4.76E-01 | -1.03 | 8.48E-01 | -0.70 | 7.59E-01 |
| TEX9     | 0.06 | 4.76E-01 | 0.46  | 3.23E-01 | 0.71  | 2.38E-01 |
| CNTNAP3  | 0.06 | 4.76E-01 | 0.56  | 2.88E-01 | -1.35 | 9.11E-01 |
| PTCD2    | 0.06 | 4.77E-01 | -0.93 | 8.23E-01 | 0.20  | 4.20E-01 |
| KIAA1841 | 0.06 | 4.77E-01 | -0.43 | 6.65E-01 | 0.25  | 4.01E-01 |
| C18orf42 | 0.06 | 4.77E-01 | -0.12 | 5.49E-01 | -1.18 | 8.81E-01 |
| KREMEN2  | 0.06 | 4.77E-01 | -0.14 | 5.55E-01 | 1.16  | 1.23E-01 |
| FLG2     | 0.06 | 4.77E-01 | -0.09 | 5.35E-01 | -0.85 | 8.03E-01 |
| TTC23    | 0.06 | 4.77E-01 | -0.13 | 5.51E-01 | -0.47 | 6.81E-01 |
| MLIP     | 0.06 | 4.77E-01 | 1.57  | 5.82E-02 | -0.11 | 5.44E-01 |
| CLPSL1   | 0.06 | 4.77E-01 | 0.65  | 2.58E-01 | -0.56 | 7.13E-01 |
| GSN      | 0.06 | 4.77E-01 | -0.88 | 8.11E-01 | -0.44 | 6.72E-01 |
| FAM185A  | 0.06 | 4.77E-01 | 0.40  | 3.46E-01 | -1.32 | 9.07E-01 |
| GPR55    | 0.06 | 4.77E-01 | -0.88 | 8.10E-01 | 0.05  | 4.81E-01 |
| CHRNA4   | 0.06 | 4.77E-01 | 0.76  | 2.25E-01 | 0.55  | 2.91E-01 |



|          |      |          |       |          |       |          |
|----------|------|----------|-------|----------|-------|----------|
| C3orf65  | 0.06 | 4.77E-01 | -0.03 | 5.14E-01 | -0.77 | 7.79E-01 |
| ZNF583   | 0.06 | 4.77E-01 | -0.98 | 8.36E-01 | 0.43  | 3.35E-01 |
| NAA35    | 0.06 | 4.77E-01 | 0.74  | 2.30E-01 | 0.17  | 4.34E-01 |
| C16orf71 | 0.06 | 4.77E-01 | -1.14 | 8.74E-01 | 1.35  | 8.85E-02 |
| PSMG4    | 0.06 | 4.77E-01 | 0.74  | 2.29E-01 | 0.42  | 3.35E-01 |
| F11      | 0.06 | 4.77E-01 | -0.66 | 7.44E-01 | 0.14  | 4.44E-01 |
| ANKRD13C | 0.06 | 4.77E-01 | -0.22 | 5.85E-01 | -0.33 | 6.31E-01 |
| FOXO1    | 0.06 | 4.77E-01 | 0.07  | 4.73E-01 | -0.53 | 7.04E-01 |
| DZIP1L   | 0.06 | 4.77E-01 | 0.89  | 1.88E-01 | -0.64 | 7.40E-01 |
| PALMD    | 0.06 | 4.77E-01 | 0.41  | 3.43E-01 | -1.29 | 9.01E-01 |
| GALM     | 0.06 | 4.77E-01 | -0.68 | 7.51E-01 | 0.23  | 4.11E-01 |
| ZNF219   | 0.06 | 4.77E-01 | 1.24  | 1.07E-01 | -0.56 | 7.14E-01 |
| PPIL3    | 0.06 | 4.77E-01 | -0.02 | 5.10E-01 | -0.28 | 6.10E-01 |
| RHEBL1   | 0.06 | 4.78E-01 | -1.14 | 8.73E-01 | 0.41  | 3.40E-01 |
| CDHR4    | 0.06 | 4.78E-01 | -0.63 | 7.35E-01 | 1.77  | 3.83E-02 |
| RPS6KB2  | 0.06 | 4.78E-01 | 1.06  | 1.45E-01 | -0.59 | 7.24E-01 |
| CALN1    | 0.06 | 4.78E-01 | 0.88  | 1.90E-01 | -1.22 | 8.90E-01 |
| DNAJC22  | 0.05 | 4.78E-01 | -0.15 | 5.58E-01 | 0.48  | 3.15E-01 |
| CPN1     | 0.05 | 4.78E-01 | -0.69 | 7.55E-01 | -0.66 | 7.46E-01 |
| WDSUB1   | 0.05 | 4.78E-01 | -1.41 | 9.21E-01 | 1.32  | 9.29E-02 |
| CBLL1    | 0.05 | 4.78E-01 | 0.53  | 2.98E-01 | -1.78 | 9.63E-01 |
| MYOCD    | 0.05 | 4.78E-01 | -0.95 | 8.30E-01 | 0.34  | 3.68E-01 |
| PIK3IP1  | 0.05 | 4.78E-01 | 0.40  | 3.44E-01 | -1.70 | 9.56E-01 |
| OR5P3    | 0.05 | 4.79E-01 | -0.38 | 6.46E-01 | 0.10  | 4.58E-01 |
| NOX4     | 0.05 | 4.79E-01 | -0.35 | 6.37E-01 | -0.02 | 5.08E-01 |
| PUSL1    | 0.05 | 4.79E-01 | 0.19  | 4.26E-01 | -1.25 | 8.95E-01 |
| KCNK12   | 0.05 | 4.79E-01 | 0.33  | 3.71E-01 | -0.57 | 7.15E-01 |
| SERINC3  | 0.05 | 4.79E-01 | -0.15 | 5.60E-01 | 0.89  | 1.86E-01 |
| GCC2     | 0.05 | 4.79E-01 | 0.05  | 4.81E-01 | -0.69 | 7.56E-01 |
| AHNAK2   | 0.05 | 4.79E-01 | 0.43  | 3.33E-01 | -0.84 | 7.99E-01 |
| ITGA2B   | 0.05 | 4.79E-01 | -0.84 | 7.98E-01 | -0.26 | 6.04E-01 |

|          |      |          |       |          |       |          |
|----------|------|----------|-------|----------|-------|----------|
| SERINC5  | 0.05 | 4.79E-01 | 0.91  | 1.83E-01 | -0.70 | 7.59E-01 |
| C2orf72  | 0.05 | 4.79E-01 | -1.35 | 9.11E-01 | 0.82  | 2.05E-01 |
| KCTD5    | 0.05 | 4.79E-01 | -0.39 | 6.52E-01 | 1.85  | 3.21E-02 |
| FRMPD1   | 0.05 | 4.79E-01 | 1.30  | 9.67E-02 | -0.02 | 5.10E-01 |
| POLR2F   | 0.05 | 4.79E-01 | -0.96 | 8.32E-01 | 0.18  | 4.29E-01 |
| RGS3     | 0.05 | 4.79E-01 | 0.31  | 3.80E-01 | 0.31  | 3.77E-01 |
| ABHD15   | 0.05 | 4.79E-01 | 0.69  | 2.46E-01 | 0.28  | 3.90E-01 |
| RAF1     | 0.05 | 4.80E-01 | -0.63 | 7.36E-01 | 0.41  | 3.40E-01 |
| SERINC1  | 0.05 | 4.80E-01 | 0.80  | 2.13E-01 | -1.10 | 8.65E-01 |
| RESP18   | 0.05 | 4.80E-01 | 0.09  | 4.65E-01 | -1.23 | 8.91E-01 |
| WDR49    | 0.05 | 4.80E-01 | 0.19  | 4.26E-01 | -0.23 | 5.92E-01 |
| ARHGAP20 | 0.05 | 4.80E-01 | -0.19 | 5.73E-01 | -0.51 | 6.95E-01 |
| ZC3H15   | 0.05 | 4.80E-01 | 0.10  | 4.61E-01 | -0.51 | 6.96E-01 |
| EDC4     | 0.05 | 4.80E-01 | -0.19 | 5.77E-01 | 1.56  | 5.98E-02 |
| GPR18    | 0.05 | 4.80E-01 | -0.28 | 6.11E-01 | 0.58  | 2.81E-01 |
| RANBP2   | 0.05 | 4.80E-01 | -0.22 | 5.87E-01 | -0.22 | 5.85E-01 |
| ZC3H11A  | 0.05 | 4.80E-01 | -0.58 | 7.20E-01 | -0.44 | 6.68E-01 |
| SERTAD2  | 0.05 | 4.80E-01 | 0.15  | 4.41E-01 | 0.13  | 4.50E-01 |
| CCDC108  | 0.05 | 4.80E-01 | -0.24 | 5.94E-01 | 1.51  | 6.56E-02 |
| PK4      | 0.05 | 4.80E-01 | 0.36  | 3.58E-01 | 0.32  | 3.76E-01 |
| MRPS27   | 0.05 | 4.80E-01 | -0.71 | 7.60E-01 | -0.08 | 5.31E-01 |
| MAN2A2   | 0.05 | 4.80E-01 | 0.95  | 1.70E-01 | -1.12 | 8.69E-01 |
| SETD5    | 0.05 | 4.80E-01 | 0.38  | 3.54E-01 | -0.07 | 5.27E-01 |
| ABI3     | 0.05 | 4.80E-01 | -1.94 | 9.74E-01 | 1.98  | 2.38E-02 |
| KIAA1468 | 0.05 | 4.80E-01 | 0.37  | 3.56E-01 | 0.49  | 3.13E-01 |
| TBX19    | 0.05 | 4.80E-01 | 1.12  | 1.31E-01 | -0.65 | 7.43E-01 |
| CPT1C    | 0.05 | 4.80E-01 | 0.25  | 4.01E-01 | -0.93 | 8.24E-01 |
| RFX7     | 0.05 | 4.80E-01 | 0.95  | 1.70E-01 | 0.45  | 3.27E-01 |
| METRN    | 0.05 | 4.80E-01 | 0.25  | 4.01E-01 | -0.61 | 7.30E-01 |
| ASTN2    | 0.05 | 4.80E-01 | 1.05  | 1.48E-01 | -1.31 | 9.06E-01 |
| TAB1     | 0.05 | 4.80E-01 | 0.36  | 3.59E-01 | -0.77 | 7.79E-01 |

|          |      |          |       |          |       |          |
|----------|------|----------|-------|----------|-------|----------|
| CCSAP    | 0.05 | 4.81E-01 | -0.80 | 7.87E-01 | 0.42  | 3.37E-01 |
| EXOC8    | 0.05 | 4.81E-01 | 2.01  | 2.20E-02 | 0.52  | 3.02E-01 |
| PIGT     | 0.05 | 4.81E-01 | 0.19  | 4.23E-01 | 0.38  | 3.51E-01 |
| LTF      | 0.05 | 4.81E-01 | 0.26  | 3.97E-01 | -0.48 | 6.85E-01 |
| IL17A    | 0.05 | 4.81E-01 | 0.09  | 4.64E-01 | -1.15 | 8.75E-01 |
| PIP4K2A  | 0.05 | 4.81E-01 | -1.29 | 9.02E-01 | 0.15  | 4.42E-01 |
| NPAP1    | 0.05 | 4.81E-01 | 1.10  | 1.35E-01 | -0.35 | 6.38E-01 |
| EMILIN3  | 0.05 | 4.81E-01 | 0.49  | 3.10E-01 | -0.92 | 8.20E-01 |
| UGDH     | 0.05 | 4.81E-01 | -0.82 | 7.94E-01 | -0.63 | 7.36E-01 |
| KTI12    | 0.05 | 4.81E-01 | -0.60 | 7.25E-01 | 0.29  | 3.85E-01 |
| CHMP2B   | 0.05 | 4.81E-01 | -0.45 | 6.75E-01 | 0.94  | 1.74E-01 |
| TAF1D    | 0.05 | 4.81E-01 | -0.25 | 6.00E-01 | -0.10 | 5.40E-01 |
| SUMF1    | 0.05 | 4.81E-01 | -0.11 | 5.42E-01 | 0.61  | 2.72E-01 |
| AKR1E2   | 0.05 | 4.81E-01 | 0.09  | 4.65E-01 | -0.30 | 6.18E-01 |
| IFNA13   | 0.05 | 4.81E-01 | -0.83 | 7.97E-01 | 0.20  | 4.19E-01 |
| SMDT1    | 0.05 | 4.81E-01 | 1.09  | 1.37E-01 | -0.21 | 5.82E-01 |
| SDAD1    | 0.05 | 4.81E-01 | -0.59 | 7.23E-01 | 0.15  | 4.39E-01 |
| FITM2    | 0.05 | 4.81E-01 | 0.55  | 2.90E-01 | -0.76 | 7.77E-01 |
| WDR4     | 0.05 | 4.81E-01 | 0.04  | 4.86E-01 | 0.17  | 4.33E-01 |
| OR2B3    | 0.05 | 4.82E-01 | -0.87 | 8.08E-01 | 1.41  | 7.98E-02 |
| CBLB     | 0.05 | 4.82E-01 | 0.10  | 4.58E-01 | -0.28 | 6.09E-01 |
| DUSP16   | 0.05 | 4.82E-01 | -1.45 | 9.27E-01 | -0.05 | 5.19E-01 |
| CASC1    | 0.05 | 4.82E-01 | 1.76  | 3.93E-02 | 0.11  | 4.55E-01 |
| NUP88    | 0.05 | 4.82E-01 | 1.49  | 6.79E-02 | 0.57  | 2.84E-01 |
| ERCC6    | 0.05 | 4.82E-01 | -0.77 | 7.81E-01 | -0.22 | 5.87E-01 |
| SIGLEC12 | 0.05 | 4.82E-01 | -0.09 | 5.35E-01 | -0.72 | 7.64E-01 |
| HIGD1C   | 0.05 | 4.82E-01 | 0.58  | 2.81E-01 | -0.42 | 6.63E-01 |
| BAX      | 0.04 | 4.82E-01 | -1.90 | 9.71E-01 | 0.89  | 1.87E-01 |
| ASAP2    | 0.04 | 4.82E-01 | 0.95  | 1.71E-01 | 0.42  | 3.37E-01 |
| PNPLA8   | 0.04 | 4.82E-01 | 0.39  | 3.48E-01 | -0.82 | 7.94E-01 |
| TSGA13   | 0.04 | 4.82E-01 | 0.25  | 4.03E-01 | -1.39 | 9.18E-01 |

|          |      |          |       |          |       |          |
|----------|------|----------|-------|----------|-------|----------|
| CCKBR    | 0.04 | 4.82E-01 | 0.93  | 1.76E-01 | -0.64 | 7.38E-01 |
| INSIG2   | 0.04 | 4.83E-01 | 1.38  | 8.34E-02 | -1.91 | 9.72E-01 |
| NINJ2    | 0.04 | 4.83E-01 | -0.13 | 5.53E-01 | 1.37  | 8.49E-02 |
| LRRRC38  | 0.04 | 4.83E-01 | 0.83  | 2.03E-01 | -1.02 | 8.45E-01 |
| NPHS1    | 0.04 | 4.83E-01 | -0.35 | 6.38E-01 | -0.17 | 5.66E-01 |
| NKX2-6   | 0.04 | 4.83E-01 | 0.29  | 3.87E-01 | -0.50 | 6.92E-01 |
| PDIA4    | 0.04 | 4.83E-01 | 0.76  | 2.25E-01 | -1.20 | 8.86E-01 |
| GABRP    | 0.04 | 4.83E-01 | 0.87  | 1.93E-01 | -0.36 | 6.40E-01 |
| RAP1GAP  | 0.04 | 4.83E-01 | 0.47  | 3.18E-01 | -1.20 | 8.85E-01 |
| PSMB10   | 0.04 | 4.83E-01 | -0.79 | 7.84E-01 | 1.04  | 1.48E-01 |
| ERCC6L2  | 0.04 | 4.83E-01 | 0.65  | 2.58E-01 | -0.69 | 7.53E-01 |
| RAB2A    | 0.04 | 4.83E-01 | -1.19 | 8.82E-01 | 0.48  | 3.16E-01 |
| ZNF80    | 0.04 | 4.83E-01 | 0.17  | 4.33E-01 | 0.17  | 4.34E-01 |
| SKA1     | 0.04 | 4.83E-01 | 0.74  | 2.30E-01 | -1.46 | 9.28E-01 |
| FUT6     | 0.04 | 4.83E-01 | 0.23  | 4.11E-01 | -0.07 | 5.29E-01 |
| AHSA1    | 0.04 | 4.83E-01 | -1.32 | 9.07E-01 | 0.30  | 3.82E-01 |
| ATAD2    | 0.04 | 4.84E-01 | 0.41  | 3.40E-01 | 0.79  | 2.15E-01 |
| CADM4    | 0.04 | 4.84E-01 | -1.10 | 8.64E-01 | -0.09 | 5.35E-01 |
| STX10    | 0.04 | 4.84E-01 | 1.98  | 2.39E-02 | 0.67  | 2.52E-01 |
| C11orf54 | 0.04 | 4.84E-01 | -0.56 | 7.12E-01 | -0.07 | 5.28E-01 |
| C1orf27  | 0.04 | 4.84E-01 | -0.38 | 6.48E-01 | -0.61 | 7.28E-01 |
| OR52E4   | 0.04 | 4.84E-01 | -0.48 | 6.84E-01 | 0.98  | 1.64E-01 |
| SHANK3   | 0.04 | 4.84E-01 | 1.06  | 1.46E-01 | -0.59 | 7.22E-01 |
| SRP19    | 0.04 | 4.84E-01 | -1.01 | 8.44E-01 | 1.72  | 4.23E-02 |
| TMEM220  | 0.04 | 4.84E-01 | 0.78  | 2.17E-01 | -0.44 | 6.69E-01 |
| ADORA3   | 0.04 | 4.84E-01 | -0.59 | 7.24E-01 | 1.41  | 7.93E-02 |
| ZNF44    | 0.04 | 4.84E-01 | 0.28  | 3.88E-01 | -0.23 | 5.92E-01 |
| RAI14    | 0.04 | 4.84E-01 | 1.54  | 6.12E-02 | -1.51 | 9.35E-01 |
| RNF43    | 0.04 | 4.84E-01 | 0.65  | 2.57E-01 | -0.33 | 6.29E-01 |
| 43167    | 0.04 | 4.84E-01 | 1.20  | 1.15E-01 | -1.42 | 9.22E-01 |
| TSEN2    | 0.04 | 4.85E-01 | -0.78 | 7.83E-01 | 0.91  | 1.81E-01 |

|          |      |          |       |          |       |          |
|----------|------|----------|-------|----------|-------|----------|
| RBM39    | 0.04 | 4.85E-01 | -0.32 | 6.25E-01 | -0.70 | 7.57E-01 |
| GCNT1    | 0.04 | 4.85E-01 | -0.36 | 6.39E-01 | -0.31 | 6.23E-01 |
| RBPMS    | 0.04 | 4.85E-01 | 0.41  | 3.40E-01 | -0.89 | 8.12E-01 |
| SBK3     | 0.04 | 4.85E-01 | -0.87 | 8.07E-01 | 0.49  | 3.10E-01 |
| LCE4A    | 0.04 | 4.85E-01 | -0.47 | 6.81E-01 | 1.06  | 1.46E-01 |
| PRKAG1   | 0.04 | 4.85E-01 | -0.31 | 6.23E-01 | -0.46 | 6.78E-01 |
| TEAD4    | 0.04 | 4.85E-01 | -0.94 | 8.27E-01 | -0.74 | 7.72E-01 |
| SEMA3F   | 0.04 | 4.85E-01 | 0.60  | 2.75E-01 | -0.40 | 6.57E-01 |
| TPM4     | 0.04 | 4.85E-01 | -0.86 | 8.04E-01 | 0.47  | 3.19E-01 |
| EIF3I    | 0.04 | 4.85E-01 | -0.46 | 6.77E-01 | 0.01  | 4.98E-01 |
| HCLS1    | 0.04 | 4.85E-01 | 0.57  | 2.86E-01 | -1.77 | 9.62E-01 |
| FLOT2    | 0.04 | 4.85E-01 | -0.79 | 7.84E-01 | -0.24 | 5.95E-01 |
| PPARGC1B | 0.04 | 4.85E-01 | -0.99 | 8.40E-01 | -1.04 | 8.51E-01 |
| TOP3A    | 0.04 | 4.85E-01 | -0.06 | 5.24E-01 | -1.11 | 8.66E-01 |
| HSPA12A  | 0.04 | 4.85E-01 | 0.48  | 3.14E-01 | 0.27  | 3.93E-01 |
| GPR151   | 0.04 | 4.85E-01 | -0.28 | 6.12E-01 | -0.23 | 5.90E-01 |
| ZNHIT6   | 0.04 | 4.85E-01 | 1.86  | 3.18E-02 | -0.07 | 5.28E-01 |
| TUBGCP3  | 0.04 | 4.85E-01 | 1.01  | 1.57E-01 | -0.82 | 7.95E-01 |
| TSPAN2   | 0.04 | 4.85E-01 | -0.74 | 7.72E-01 | -0.70 | 7.58E-01 |
| AMZ1     | 0.04 | 4.85E-01 | 0.75  | 2.27E-01 | 1.01  | 1.55E-01 |
| OBSCN    | 0.04 | 4.85E-01 | 0.82  | 2.06E-01 | 0.01  | 4.97E-01 |
| C1orf85  | 0.04 | 4.86E-01 | 0.53  | 2.98E-01 | -0.81 | 7.91E-01 |
| AADA3L3  | 0.04 | 4.86E-01 | -1.17 | 8.78E-01 | 0.17  | 4.33E-01 |
| ZMPSTE24 | 0.04 | 4.86E-01 | -0.85 | 8.02E-01 | -0.08 | 5.34E-01 |
| SLC30A3  | 0.04 | 4.86E-01 | -1.83 | 9.67E-01 | 0.63  | 2.64E-01 |
| PIK3R6   | 0.04 | 4.86E-01 | 1.23  | 1.09E-01 | 1.81  | 3.50E-02 |
| PLEKHA3  | 0.04 | 4.86E-01 | -0.58 | 7.20E-01 | -0.04 | 5.18E-01 |
| PGM2     | 0.04 | 4.86E-01 | -0.27 | 6.05E-01 | 1.26  | 1.05E-01 |
| RYR2     | 0.04 | 4.86E-01 | 0.37  | 3.57E-01 | -0.87 | 8.09E-01 |
| CTRB1    | 0.04 | 4.86E-01 | -0.29 | 6.14E-01 | -0.53 | 7.02E-01 |
| CELF6    | 0.04 | 4.86E-01 | 0.05  | 4.79E-01 | 0.55  | 2.91E-01 |

|               |      |          |       |          |       |          |
|---------------|------|----------|-------|----------|-------|----------|
| ICOSLG        | 0.04 | 4.86E-01 | 0.29  | 3.86E-01 | 0.28  | 3.91E-01 |
| HOXD10        | 0.04 | 4.86E-01 | -0.77 | 7.80E-01 | 0.24  | 4.06E-01 |
| ST20-MTHFS    | 0.04 | 4.86E-01 | -0.50 | 6.90E-01 | -0.81 | 7.90E-01 |
| CALCR         | 0.04 | 4.86E-01 | 1.74  | 4.11E-02 | -1.34 | 9.09E-01 |
| DUOXA2        | 0.03 | 4.86E-01 | 1.25  | 1.06E-01 | -0.26 | 6.02E-01 |
| ZNF552        | 0.03 | 4.86E-01 | -0.13 | 5.50E-01 | -0.85 | 8.02E-01 |
| RPP30         | 0.03 | 4.86E-01 | 0.64  | 2.60E-01 | 0.83  | 2.02E-01 |
| SLC5A12       | 0.03 | 4.86E-01 | 0.38  | 3.51E-01 | 0.07  | 4.71E-01 |
| KIAA1107      | 0.03 | 4.86E-01 | -0.21 | 5.81E-01 | -0.88 | 8.12E-01 |
| C14orf180     | 0.03 | 4.86E-01 | 0.09  | 4.66E-01 | -0.73 | 7.68E-01 |
| IQCJ-SCHIP1   | 0.03 | 4.86E-01 | 0.50  | 3.08E-01 | -0.10 | 5.39E-01 |
| RP11-383H13.1 | 0.03 | 4.86E-01 | 1.15  | 1.25E-01 | -1.40 | 9.20E-01 |
| NTNG2         | 0.03 | 4.86E-01 | -0.98 | 8.37E-01 | 0.61  | 2.69E-01 |
| DNAJC12       | 0.03 | 4.86E-01 | -0.27 | 6.07E-01 | -0.15 | 5.62E-01 |
| ATXN7L3B      | 0.03 | 4.87E-01 | 0.75  | 2.26E-01 | 0.61  | 2.70E-01 |
| GPRC5A        | 0.03 | 4.87E-01 | 0.95  | 1.70E-01 | -0.65 | 7.42E-01 |
| AGR3          | 0.03 | 4.87E-01 | -0.22 | 5.87E-01 | 1.00  | 1.59E-01 |
| ZNF683        | 0.03 | 4.87E-01 | -0.69 | 7.53E-01 | -0.68 | 7.53E-01 |
| NDRG2         | 0.03 | 4.87E-01 | 0.88  | 1.91E-01 | 0.84  | 2.02E-01 |
| CD6           | 0.03 | 4.87E-01 | -0.27 | 6.06E-01 | -0.59 | 7.22E-01 |
| HDGFRP2       | 0.03 | 4.87E-01 | -0.76 | 7.77E-01 | 0.58  | 2.82E-01 |
| AMDHD1        | 0.03 | 4.87E-01 | 0.50  | 3.10E-01 | 1.04  | 1.49E-01 |
| SNRPF         | 0.03 | 4.87E-01 | 0.69  | 2.45E-01 | -0.55 | 7.09E-01 |
| REG           | 0.03 | 4.87E-01 | 1.01  | 1.56E-01 | -0.89 | 8.12E-01 |
| STATH         | 0.03 | 4.87E-01 | -0.38 | 6.48E-01 | -0.23 | 5.91E-01 |
| OR10S1        | 0.03 | 4.87E-01 | -0.91 | 8.18E-01 | 0.45  | 3.26E-01 |
| OR51B6        | 0.03 | 4.87E-01 | 0.21  | 4.18E-01 | 0.66  | 2.54E-01 |
| TELO2         | 0.03 | 4.87E-01 | 0.26  | 3.99E-01 | -0.10 | 5.39E-01 |
| TRIM37        | 0.03 | 4.87E-01 | 0.83  | 2.03E-01 | 0.45  | 3.25E-01 |
| CRYBA1        | 0.03 | 4.88E-01 | 1.00  | 1.58E-01 | 0.22  | 4.13E-01 |
| CEP112        | 0.03 | 4.88E-01 | -0.63 | 7.34E-01 | 0.05  | 4.79E-01 |

|           |      |          |       |          |       |          |
|-----------|------|----------|-------|----------|-------|----------|
| C2orf48   | 0.03 | 4.88E-01 | -0.26 | 6.04E-01 | 0.38  | 3.54E-01 |
| RTBDN     | 0.03 | 4.88E-01 | 0.04  | 4.84E-01 | -0.64 | 7.38E-01 |
| SNED1     | 0.03 | 4.88E-01 | 0.09  | 4.63E-01 | -1.72 | 9.57E-01 |
| PLIN3     | 0.03 | 4.88E-01 | -1.08 | 8.59E-01 | 0.41  | 3.40E-01 |
| NEK6      | 0.03 | 4.88E-01 | 0.13  | 4.46E-01 | -1.34 | 9.10E-01 |
| SDR39U1   | 0.03 | 4.88E-01 | 0.24  | 4.07E-01 | -1.06 | 8.55E-01 |
| SLC4A1AP  | 0.03 | 4.88E-01 | -0.97 | 8.34E-01 | 0.63  | 2.66E-01 |
| DUS3L     | 0.03 | 4.88E-01 | -0.44 | 6.70E-01 | -0.05 | 5.21E-01 |
| FAM19A5   | 0.03 | 4.88E-01 | 0.37  | 3.54E-01 | 0.40  | 3.43E-01 |
| NARS2     | 0.03 | 4.88E-01 | -0.79 | 7.85E-01 | 0.78  | 2.19E-01 |
| GLMN      | 0.03 | 4.88E-01 | -0.23 | 5.90E-01 | -0.86 | 8.05E-01 |
| TTC34     | 0.03 | 4.89E-01 | -0.05 | 5.18E-01 | 0.94  | 1.75E-01 |
| TNNI3     | 0.03 | 4.89E-01 | 1.16  | 1.23E-01 | -1.40 | 9.20E-01 |
| SPATC1    | 0.03 | 4.89E-01 | -0.19 | 5.76E-01 | -0.62 | 7.34E-01 |
| C1orf63   | 0.03 | 4.89E-01 | 0.03  | 4.88E-01 | 1.06  | 1.46E-01 |
| TOR2A     | 0.03 | 4.89E-01 | 0.64  | 2.61E-01 | -1.29 | 9.01E-01 |
| ZFR       | 0.03 | 4.89E-01 | -0.69 | 7.56E-01 | -0.28 | 6.09E-01 |
| SIDT2     | 0.03 | 4.89E-01 | -1.30 | 9.04E-01 | -0.10 | 5.39E-01 |
| UCHL1     | 0.03 | 4.89E-01 | -2.28 | 9.89E-01 | 0.93  | 1.76E-01 |
| TAX1BP3   | 0.03 | 4.89E-01 | 1.63  | 5.13E-02 | -0.12 | 5.47E-01 |
| NT5DC4    | 0.03 | 4.89E-01 | -0.02 | 5.08E-01 | -0.72 | 7.65E-01 |
| FKBP4     | 0.03 | 4.89E-01 | 0.95  | 1.70E-01 | -0.49 | 6.87E-01 |
| NCOR1     | 0.03 | 4.89E-01 | -1.93 | 9.73E-01 | 0.54  | 2.93E-01 |
| FARSA     | 0.03 | 4.89E-01 | -0.75 | 7.74E-01 | 0.92  | 1.79E-01 |
| ENPP6     | 0.03 | 4.90E-01 | -0.92 | 8.21E-01 | 0.00  | 5.00E-01 |
| MAST4     | 0.03 | 4.90E-01 | -0.40 | 6.55E-01 | -1.00 | 8.42E-01 |
| RHEB      | 0.03 | 4.90E-01 | 0.41  | 3.39E-01 | -0.38 | 6.47E-01 |
| C1QL2     | 0.03 | 4.90E-01 | -0.35 | 6.37E-01 | 0.00  | 5.02E-01 |
| C14orf182 | 0.03 | 4.90E-01 | 0.66  | 2.55E-01 | -0.89 | 8.12E-01 |
| AZU1      | 0.02 | 4.90E-01 | -0.28 | 6.09E-01 | -0.83 | 7.96E-01 |
| C4orf17   | 0.02 | 4.90E-01 | -0.26 | 6.04E-01 | -1.01 | 8.44E-01 |

|              |      |          |       |          |       |          |
|--------------|------|----------|-------|----------|-------|----------|
| TIGD6        | 0.02 | 4.90E-01 | -0.30 | 6.16E-01 | -0.45 | 6.75E-01 |
| CX3CL1       | 0.02 | 4.90E-01 | -0.73 | 7.66E-01 | -0.41 | 6.59E-01 |
| KRT31        | 0.02 | 4.90E-01 | 0.25  | 4.02E-01 | -1.58 | 9.43E-01 |
| GRB10        | 0.02 | 4.90E-01 | 0.01  | 4.95E-01 | -0.61 | 7.29E-01 |
| COPZ1        | 0.02 | 4.90E-01 | 1.65  | 4.92E-02 | 1.20  | 1.14E-01 |
| ZNF367       | 0.02 | 4.90E-01 | -0.05 | 5.21E-01 | 0.89  | 1.86E-01 |
| HYAL1        | 0.02 | 4.90E-01 | 0.63  | 2.63E-01 | -0.91 | 8.19E-01 |
| THAP5        | 0.02 | 4.91E-01 | -1.19 | 8.84E-01 | 0.18  | 4.28E-01 |
| ZSCAN10      | 0.02 | 4.91E-01 | -1.44 | 9.25E-01 | 1.24  | 1.07E-01 |
| AGMO         | 0.02 | 4.91E-01 | -0.29 | 6.13E-01 | 0.66  | 2.54E-01 |
| RAB2B        | 0.02 | 4.91E-01 | -0.44 | 6.69E-01 | 0.45  | 3.28E-01 |
| BEGAIN       | 0.02 | 4.91E-01 | 0.49  | 3.13E-01 | -1.47 | 9.29E-01 |
| BANF1        | 0.02 | 4.91E-01 | -0.83 | 7.98E-01 | -0.09 | 5.35E-01 |
| PSD          | 0.02 | 4.91E-01 | -0.11 | 5.45E-01 | 0.29  | 3.84E-01 |
| DPCD         | 0.02 | 4.91E-01 | 0.37  | 3.57E-01 | 1.06  | 1.44E-01 |
| STX7         | 0.02 | 4.91E-01 | 0.90  | 1.83E-01 | 0.00  | 4.99E-01 |
| FCHSD2       | 0.02 | 4.91E-01 | -0.58 | 7.19E-01 | 0.41  | 3.42E-01 |
| TRIB2        | 0.02 | 4.91E-01 | -0.48 | 6.86E-01 | 0.00  | 4.99E-01 |
| FAM71C       | 0.02 | 4.91E-01 | -1.88 | 9.70E-01 | 1.32  | 9.31E-02 |
| NDUFB7       | 0.02 | 4.91E-01 | -0.84 | 7.99E-01 | 0.17  | 4.33E-01 |
| KRTAP12-3    | 0.02 | 4.91E-01 | 0.38  | 3.53E-01 | -0.71 | 7.62E-01 |
| EIF4E1B      | 0.02 | 4.91E-01 | -0.74 | 7.69E-01 | -0.07 | 5.30E-01 |
| C6orf203     | 0.02 | 4.91E-01 | -0.09 | 5.37E-01 | -0.69 | 7.55E-01 |
| DDX50        | 0.02 | 4.91E-01 | -1.45 | 9.26E-01 | 0.23  | 4.08E-01 |
| ZHX1-C8ORF76 | 0.02 | 4.92E-01 | 2.09  | 1.82E-02 | -0.45 | 6.74E-01 |
| TTLL11       | 0.02 | 4.92E-01 | 0.52  | 3.00E-01 | -0.73 | 7.67E-01 |
| TPR          | 0.02 | 4.92E-01 | -0.55 | 7.10E-01 | -0.69 | 7.56E-01 |
| MAK16        | 0.02 | 4.92E-01 | -0.32 | 6.25E-01 | -0.79 | 7.86E-01 |
| FSTL4        | 0.02 | 4.92E-01 | -2.27 | 9.88E-01 | 1.70  | 4.44E-02 |
| OR14A2       | 0.02 | 4.92E-01 | 0.71  | 2.39E-01 | -2.39 | 9.92E-01 |
| TSPAN31      | 0.02 | 4.92E-01 | 0.26  | 3.97E-01 | -0.58 | 7.19E-01 |



|          |      |          |       |          |       |          |
|----------|------|----------|-------|----------|-------|----------|
| AMMECR1L | 0.02 | 4.92E-01 | 0.60  | 2.75E-01 | -0.33 | 6.30E-01 |
| BANK1    | 0.02 | 4.92E-01 | -1.02 | 8.46E-01 | -1.07 | 8.57E-01 |
| EHHADH   | 0.02 | 4.92E-01 | 0.57  | 2.85E-01 | 0.27  | 3.94E-01 |
| C1orf110 | 0.02 | 4.92E-01 | -0.54 | 7.07E-01 | 1.26  | 1.04E-01 |
| VWA5B2   | 0.02 | 4.92E-01 | -0.07 | 5.27E-01 | -0.17 | 5.67E-01 |
| PIK3AP1  | 0.02 | 4.92E-01 | -0.49 | 6.88E-01 | -1.58 | 9.43E-01 |
| PI16     | 0.02 | 4.92E-01 | -0.55 | 7.08E-01 | -0.81 | 7.91E-01 |
| SLC5A7   | 0.02 | 4.93E-01 | -0.23 | 5.92E-01 | 0.09  | 4.65E-01 |
| ANKUB1   | 0.02 | 4.93E-01 | 0.59  | 2.78E-01 | 1.34  | 8.94E-02 |
| CLCN3    | 0.02 | 4.93E-01 | 0.72  | 2.35E-01 | 0.40  | 3.46E-01 |
| ICAM2    | 0.02 | 4.93E-01 | 0.44  | 3.29E-01 | -1.19 | 8.82E-01 |
| SLC37A4  | 0.02 | 4.93E-01 | 0.24  | 4.04E-01 | 1.75  | 4.03E-02 |
| KRTAP9-3 | 0.02 | 4.93E-01 | 0.77  | 2.21E-01 | -2.21 | 9.87E-01 |
| GPR37    | 0.02 | 4.93E-01 | -1.13 | 8.70E-01 | 1.34  | 9.07E-02 |
| DCTD     | 0.02 | 4.93E-01 | 0.02  | 4.90E-01 | -0.04 | 5.18E-01 |
| SLC36A2  | 0.02 | 4.93E-01 | 0.37  | 3.55E-01 | 1.03  | 1.51E-01 |
| BTD      | 0.02 | 4.93E-01 | -0.03 | 5.13E-01 | -0.23 | 5.91E-01 |
| MMP10    | 0.02 | 4.93E-01 | 0.01  | 4.96E-01 | 1.05  | 1.46E-01 |
| AIFM3    | 0.02 | 4.93E-01 | 0.10  | 4.60E-01 | -1.80 | 9.64E-01 |
| CFHR5    | 0.02 | 4.93E-01 | -0.52 | 6.99E-01 | -0.11 | 5.44E-01 |
| POU3F2   | 0.02 | 4.93E-01 | -1.52 | 9.36E-01 | 1.35  | 8.84E-02 |
| PCYT1A   | 0.02 | 4.93E-01 | -1.30 | 9.04E-01 | 0.80  | 2.13E-01 |
| METTL5   | 0.02 | 4.93E-01 | 0.00  | 5.00E-01 | 1.04  | 1.48E-01 |
| ZNF747   | 0.02 | 4.93E-01 | 0.95  | 1.70E-01 | -1.46 | 9.28E-01 |
| INPP4A   | 0.02 | 4.93E-01 | -0.45 | 6.73E-01 | 0.87  | 1.91E-01 |
| L3MBTL2  | 0.02 | 4.93E-01 | -0.01 | 5.05E-01 | -1.13 | 8.70E-01 |
| ZNF785   | 0.02 | 4.93E-01 | -0.05 | 5.21E-01 | 1.15  | 1.25E-01 |
| LOXL2    | 0.02 | 4.93E-01 | -0.09 | 5.34E-01 | -0.15 | 5.58E-01 |
| BPIFA1   | 0.02 | 4.94E-01 | 0.45  | 3.25E-01 | -1.24 | 8.93E-01 |
| FAM110C  | 0.02 | 4.94E-01 | -0.25 | 6.00E-01 | -0.57 | 7.16E-01 |
| KRTAP9-4 | 0.02 | 4.94E-01 | 0.30  | 3.84E-01 | -1.63 | 9.48E-01 |

|          |      |          |       |          |       |          |
|----------|------|----------|-------|----------|-------|----------|
| NUDT17   | 0.02 | 4.94E-01 | -0.81 | 7.90E-01 | 0.11  | 4.57E-01 |
| MPP6     | 0.02 | 4.94E-01 | -0.50 | 6.93E-01 | -0.27 | 6.07E-01 |
| SLC35F5  | 0.02 | 4.94E-01 | -0.43 | 6.68E-01 | -0.37 | 6.44E-01 |
| TLK2     | 0.01 | 4.94E-01 | 1.30  | 9.61E-02 | 0.60  | 2.73E-01 |
| ONECUT3  | 0.01 | 4.94E-01 | -0.97 | 8.35E-01 | 1.48  | 6.88E-02 |
| ZNF766   | 0.01 | 4.94E-01 | -0.01 | 5.03E-01 | -0.99 | 8.38E-01 |
| FOXH1    | 0.01 | 4.94E-01 | -0.85 | 8.03E-01 | -0.09 | 5.38E-01 |
| LARP4    | 0.01 | 4.94E-01 | -0.46 | 6.77E-01 | -0.55 | 7.09E-01 |
| SH3RF3   | 0.01 | 4.94E-01 | 0.71  | 2.39E-01 | -1.66 | 9.52E-01 |
| SLC2A3   | 0.01 | 4.94E-01 | -0.21 | 5.84E-01 | -0.82 | 7.93E-01 |
| UMPS     | 0.01 | 4.94E-01 | -0.43 | 6.68E-01 | -0.07 | 5.29E-01 |
| KCNS1    | 0.01 | 4.94E-01 | -0.59 | 7.23E-01 | 0.10  | 4.62E-01 |
| IL23A    | 0.01 | 4.94E-01 | 0.36  | 3.60E-01 | 1.73  | 4.16E-02 |
| SCARB2   | 0.01 | 4.94E-01 | -0.37 | 6.44E-01 | -0.31 | 6.22E-01 |
| PVR      | 0.01 | 4.94E-01 | 0.86  | 1.94E-01 | -0.13 | 5.50E-01 |
| TGFBR3L  | 0.01 | 4.94E-01 | -1.41 | 9.21E-01 | 0.66  | 2.54E-01 |
| PCSK5    | 0.01 | 4.95E-01 | -1.13 | 8.70E-01 | 1.53  | 6.29E-02 |
| LRRC14   | 0.01 | 4.95E-01 | 0.46  | 3.21E-01 | -0.32 | 6.27E-01 |
| DCAF15   | 0.01 | 4.95E-01 | 0.33  | 3.70E-01 | 0.79  | 2.13E-01 |
| CHMP4C   | 0.01 | 4.95E-01 | 0.58  | 2.80E-01 | 0.25  | 4.00E-01 |
| PPP1R9B  | 0.01 | 4.95E-01 | 0.32  | 3.73E-01 | -0.15 | 5.59E-01 |
| RASL11A  | 0.01 | 4.95E-01 | -0.50 | 6.91E-01 | 0.24  | 4.04E-01 |
| TMED10   | 0.01 | 4.95E-01 | 0.37  | 3.56E-01 | -0.62 | 7.31E-01 |
| ASIC1    | 0.01 | 4.95E-01 | -1.50 | 9.33E-01 | 0.64  | 2.60E-01 |
| CCDC74B  | 0.01 | 4.95E-01 | 1.10  | 1.36E-01 | -0.16 | 5.63E-01 |
| KPNA2    | 0.01 | 4.95E-01 | -0.91 | 8.20E-01 | -0.27 | 6.08E-01 |
| IL6R     | 0.01 | 4.95E-01 | -1.29 | 9.02E-01 | 0.71  | 2.37E-01 |
| LRFN5    | 0.01 | 4.95E-01 | -1.38 | 9.15E-01 | -0.11 | 5.45E-01 |
| KIAA0753 | 0.01 | 4.95E-01 | 1.47  | 7.08E-02 | -1.24 | 8.92E-01 |
| TMEM39B  | 0.01 | 4.95E-01 | -0.73 | 7.67E-01 | -0.03 | 5.11E-01 |
| HRH2     | 0.01 | 4.95E-01 | 0.34  | 3.66E-01 | -0.83 | 7.96E-01 |

|                |      |          |       |          |       |          |
|----------------|------|----------|-------|----------|-------|----------|
| DNAH9          | 0.01 | 4.95E-01 | -0.07 | 5.30E-01 | -1.38 | 9.17E-01 |
| POU6F2         | 0.01 | 4.95E-01 | 0.47  | 3.18E-01 | -0.74 | 7.70E-01 |
| DGUOK          | 0.01 | 4.95E-01 | 0.28  | 3.89E-01 | -1.21 | 8.86E-01 |
| LARP7          | 0.01 | 4.95E-01 | 0.86  | 1.94E-01 | 0.58  | 2.81E-01 |
| UGT1A3         | 0.01 | 4.95E-01 | 0.12  | 4.52E-01 | -0.18 | 5.71E-01 |
| ARRDC2         | 0.01 | 4.96E-01 | 1.18  | 1.19E-01 | 0.45  | 3.25E-01 |
| C18orf21       | 0.01 | 4.96E-01 | -0.14 | 5.54E-01 | -0.33 | 6.31E-01 |
| TFF2           | 0.01 | 4.96E-01 | 1.53  | 6.31E-02 | 1.00  | 1.59E-01 |
| TXNDC8         | 0.01 | 4.96E-01 | -0.71 | 7.60E-01 | -1.38 | 9.16E-01 |
| 43170          | 0.01 | 4.96E-01 | 0.42  | 3.37E-01 | -1.77 | 9.62E-01 |
| FAM182B        | 0.01 | 4.96E-01 | -1.63 | 9.48E-01 | 0.82  | 2.05E-01 |
| LIPM           | 0.01 | 4.96E-01 | -0.49 | 6.87E-01 | 0.01  | 4.97E-01 |
| CHD9           | 0.01 | 4.96E-01 | -0.38 | 6.50E-01 | -0.04 | 5.17E-01 |
| LPA            | 0.01 | 4.96E-01 | -0.90 | 8.16E-01 | -0.10 | 5.41E-01 |
| PGM1           | 0.01 | 4.96E-01 | 0.19  | 4.23E-01 | -1.57 | 9.42E-01 |
| GPHN           | 0.01 | 4.96E-01 | 0.71  | 2.38E-01 | -1.34 | 9.10E-01 |
| BAG2           | 0.01 | 4.96E-01 | 0.07  | 4.74E-01 | -0.26 | 6.01E-01 |
| ST13           | 0.01 | 4.96E-01 | 0.70  | 2.42E-01 | -0.07 | 5.28E-01 |
| SPP1           | 0.01 | 4.96E-01 | -0.45 | 6.73E-01 | -0.49 | 6.87E-01 |
| ALDH3A2        | 0.01 | 4.96E-01 | -1.03 | 8.47E-01 | 0.60  | 2.73E-01 |
| GJA4           | 0.01 | 4.96E-01 | -0.22 | 5.87E-01 | -1.19 | 8.83E-01 |
| C2CD4B         | 0.01 | 4.97E-01 | 1.46  | 7.19E-02 | 0.30  | 3.81E-01 |
| LAMTOR5        | 0.01 | 4.97E-01 | 0.32  | 3.73E-01 | -1.41 | 9.21E-01 |
| IFT88          | 0.01 | 4.97E-01 | -0.06 | 5.26E-01 | -0.68 | 7.51E-01 |
| ASAH1          | 0.01 | 4.97E-01 | -1.04 | 8.52E-01 | -0.49 | 6.89E-01 |
| CCDC142        | 0.01 | 4.97E-01 | -2.07 | 9.81E-01 | 0.83  | 2.02E-01 |
| KRT76          | 0.01 | 4.97E-01 | -0.44 | 6.70E-01 | 0.43  | 3.32E-01 |
| HYI            | 0.01 | 4.97E-01 | -0.06 | 5.26E-01 | -0.40 | 6.55E-01 |
| FAM205A        | 0.01 | 4.97E-01 | 0.89  | 1.88E-01 | 0.25  | 4.02E-01 |
| ARHGAP19-SLIT1 | 0.01 | 4.97E-01 | 0.56  | 2.87E-01 | -0.35 | 6.36E-01 |
| C3orf72        | 0.01 | 4.97E-01 | 0.67  | 2.53E-01 | -1.98 | 9.76E-01 |

|               |      |          |       |          |       |          |
|---------------|------|----------|-------|----------|-------|----------|
| FAM194B       | 0.01 | 4.97E-01 | -0.02 | 5.07E-01 | -0.29 | 6.13E-01 |
| NAV3          | 0.01 | 4.97E-01 | -0.77 | 7.80E-01 | -0.30 | 6.18E-01 |
| AP001816.1    | 0.01 | 4.97E-01 | -0.36 | 6.41E-01 | -0.37 | 6.44E-01 |
| NFATC3        | 0.01 | 4.97E-01 | -0.98 | 8.37E-01 | 1.08  | 1.41E-01 |
| PEG3          | 0.01 | 4.97E-01 | 0.02  | 4.93E-01 | -0.98 | 8.38E-01 |
| MRPL53        | 0.01 | 4.97E-01 | -1.14 | 8.73E-01 | 1.38  | 8.39E-02 |
| HYLS1         | 0.01 | 4.98E-01 | 0.26  | 3.98E-01 | -1.45 | 9.27E-01 |
| BCL2L13       | 0.01 | 4.98E-01 | -0.69 | 7.54E-01 | -0.72 | 7.64E-01 |
| IFT57         | 0.01 | 4.98E-01 | -0.54 | 7.06E-01 | 0.60  | 2.74E-01 |
| KCTD14        | 0.01 | 4.98E-01 | -0.84 | 7.99E-01 | -0.04 | 5.15E-01 |
| KLRB1         | 0.01 | 4.98E-01 | 1.07  | 1.41E-01 | -0.93 | 8.24E-01 |
| IRF1          | 0.01 | 4.98E-01 | 0.22  | 4.15E-01 | -1.18 | 8.82E-01 |
| ESYT2         | 0.01 | 4.98E-01 | 0.53  | 2.99E-01 | -0.82 | 7.94E-01 |
| SNCG          | 0.01 | 4.98E-01 | -0.12 | 5.49E-01 | 0.69  | 2.44E-01 |
| SLC6A9        | 0.01 | 4.98E-01 | 0.56  | 2.87E-01 | -1.29 | 9.02E-01 |
| SYNJ2BP       | 0.01 | 4.98E-01 | 0.78  | 2.18E-01 | -0.74 | 7.70E-01 |
| TMOD2         | 0.01 | 4.98E-01 | -1.73 | 9.58E-01 | 1.10  | 1.35E-01 |
| ADRB3         | 0.01 | 4.98E-01 | -0.31 | 6.22E-01 | 1.32  | 9.37E-02 |
| EFCAB14       | 0.00 | 4.98E-01 | -0.55 | 7.10E-01 | 0.04  | 4.83E-01 |
| RPS12         | 0.00 | 4.98E-01 | 0.94  | 1.74E-01 | 1.28  | 1.00E-01 |
| RP11-147C23.1 | 0.00 | 4.98E-01 | 0.10  | 4.61E-01 | -0.24 | 5.96E-01 |
| FBXO45        | 0.00 | 4.98E-01 | -0.78 | 7.83E-01 | 0.09  | 4.63E-01 |
| AAED1         | 0.00 | 4.98E-01 | 0.29  | 3.86E-01 | -0.92 | 8.22E-01 |
| SCML4         | 0.00 | 4.98E-01 | 0.09  | 4.65E-01 | -0.30 | 6.18E-01 |
| MUC3A         | 0.00 | 4.98E-01 | 0.50  | 3.08E-01 | 0.75  | 2.27E-01 |
| PLEKHG7       | 0.00 | 4.99E-01 | -0.42 | 6.62E-01 | -0.29 | 6.14E-01 |
| POLR3E        | 0.00 | 4.99E-01 | 0.04  | 4.82E-01 | -0.90 | 8.17E-01 |
| ROCK1         | 0.00 | 4.99E-01 | -0.08 | 5.31E-01 | -0.55 | 7.10E-01 |
| RIBC2         | 0.00 | 4.99E-01 | -0.57 | 7.16E-01 | -0.20 | 5.81E-01 |
| PELP1         | 0.00 | 4.99E-01 | 1.03  | 1.52E-01 | 0.23  | 4.11E-01 |
| GPIHBP1       | 0.00 | 4.99E-01 | 0.15  | 4.39E-01 | 0.51  | 3.06E-01 |

|           |      |          |       |          |       |          |
|-----------|------|----------|-------|----------|-------|----------|
| NRN1L     | 0.00 | 4.99E-01 | 0.98  | 1.64E-01 | 0.81  | 2.09E-01 |
| RORC      | 0.00 | 4.99E-01 | -0.11 | 5.44E-01 | -0.94 | 8.26E-01 |
| GPD1L     | 0.00 | 4.99E-01 | -0.54 | 7.04E-01 | -0.73 | 7.68E-01 |
| ARHGDIG   | 0.00 | 4.99E-01 | -1.13 | 8.70E-01 | -0.25 | 5.99E-01 |
| FO XK1    | 0.00 | 4.99E-01 | 0.32  | 3.74E-01 | -1.76 | 9.61E-01 |
| ZNF414    | 0.00 | 4.99E-01 | 0.03  | 4.87E-01 | -0.80 | 7.87E-01 |
| TMBIM1    | 0.00 | 4.99E-01 | -0.33 | 6.28E-01 | -0.49 | 6.87E-01 |
| RAB11FIP4 | 0.00 | 4.99E-01 | -0.15 | 5.61E-01 | 0.18  | 4.27E-01 |
| KCND3     | 0.00 | 4.99E-01 | 1.16  | 1.23E-01 | -0.21 | 5.83E-01 |
| MIA3      | 0.00 | 4.99E-01 | 0.33  | 3.72E-01 | -1.26 | 8.96E-01 |
| XPO5      | 0.00 | 4.99E-01 | -0.14 | 5.54E-01 | -0.42 | 6.63E-01 |
| SSMEM1    | 0.00 | 4.99E-01 | 1.10  | 1.36E-01 | -1.91 | 9.72E-01 |
| SYT11     | 0.00 | 4.99E-01 | 1.53  | 6.30E-02 | 0.19  | 4.24E-01 |
| NOL6      | 0.00 | 4.99E-01 | -1.56 | 9.40E-01 | 0.54  | 2.95E-01 |
| P2RX5     | 0.00 | 4.99E-01 | 0.21  | 4.15E-01 | -0.28 | 6.12E-01 |
| KLHL28    | 0.00 | 4.99E-01 | 0.54  | 2.96E-01 | 0.20  | 4.21E-01 |
| MLH3      | 0.00 | 4.99E-01 | 0.72  | 2.34E-01 | -0.44 | 6.69E-01 |
| SOWAHC    | 0.00 | 4.99E-01 | -1.30 | 9.03E-01 | 0.08  | 4.67E-01 |
| DPEP3     | 0.00 | 4.99E-01 | -0.82 | 7.95E-01 | 1.17  | 1.22E-01 |
| CRYBB2    | 0.00 | 5.00E-01 | -2.14 | 9.84E-01 | 1.63  | 5.14E-02 |
| HUS1B     | 0.00 | 5.00E-01 | 0.43  | 3.34E-01 | -0.77 | 7.81E-01 |
| ACTR3     | 0.00 | 5.00E-01 | -0.15 | 5.59E-01 | -0.65 | 7.42E-01 |
| TTC31     | 0.00 | 5.00E-01 | -1.23 | 8.90E-01 | 0.74  | 2.28E-01 |
| LGALS16   | 0.00 | 5.00E-01 | -0.46 | 6.77E-01 | -0.24 | 5.93E-01 |
| MKI67     | 0.00 | 5.00E-01 | 0.11  | 4.57E-01 | 0.28  | 3.89E-01 |
| KCNMB3    | 0.00 | 5.00E-01 | -0.01 | 5.04E-01 | -0.06 | 5.24E-01 |
| LINC00923 | 0.00 | 5.00E-01 | -1.19 | 8.84E-01 | 0.53  | 2.97E-01 |
| BCAM      | 0.00 | 5.00E-01 | 0.21  | 4.15E-01 | 0.75  | 2.28E-01 |
| UCN3      | 0.00 | 5.00E-01 | 0.39  | 3.48E-01 | 0.37  | 3.57E-01 |
| EZH1      | 0.00 | 5.00E-01 | -1.55 | 9.40E-01 | 0.10  | 4.60E-01 |
| TIMP3     | 0.00 | 5.00E-01 | -0.64 | 7.38E-01 | -0.39 | 6.53E-01 |

|             |      |          |       |          |       |          |
|-------------|------|----------|-------|----------|-------|----------|
| C17orf74    | 0.00 | 5.00E-01 | -1.68 | 9.53E-01 | 0.62  | 2.66E-01 |
| NWD1        | 0.00 | 5.00E-01 | -0.28 | 6.10E-01 | -0.54 | 7.06E-01 |
| PRM1        | 0.00 | 5.00E-01 | 0.48  | 3.15E-01 | 1.57  | 5.81E-02 |
| C10orf131   | 0.00 | 5.00E-01 | -0.19 | 5.74E-01 | 0.27  | 3.94E-01 |
| C1QTNF1     | 0.00 | 5.00E-01 | -1.69 | 9.54E-01 | 0.94  | 1.75E-01 |
| GUCA1A      | 0.00 | 5.00E-01 | -0.01 | 5.04E-01 | -0.64 | 7.39E-01 |
| DCAF6       | 0.00 | 5.00E-01 | -0.45 | 6.74E-01 | -0.21 | 5.83E-01 |
| TUBB3       | 0.00 | 5.00E-01 | 0.99  | 1.61E-01 | 0.11  | 4.58E-01 |
| FOXF2       | 0.00 | 5.01E-01 | 0.42  | 3.38E-01 | 0.73  | 2.33E-01 |
| CAMKK2      | 0.00 | 5.01E-01 | 0.18  | 4.28E-01 | -0.50 | 6.91E-01 |
| PKNOX2      | 0.00 | 5.01E-01 | 0.57  | 2.83E-01 | -0.18 | 5.70E-01 |
| SNN         | 0.00 | 5.01E-01 | 0.65  | 2.57E-01 | -0.75 | 7.75E-01 |
| SLC4A11     | 0.00 | 5.01E-01 | 0.23  | 4.08E-01 | -1.01 | 8.44E-01 |
| TUSC3       | 0.00 | 5.01E-01 | -2.11 | 9.83E-01 | 0.18  | 4.30E-01 |
| FAM134A     | 0.00 | 5.01E-01 | -0.29 | 6.15E-01 | -0.03 | 5.13E-01 |
| SPRED1      | 0.00 | 5.01E-01 | -1.17 | 8.79E-01 | 0.24  | 4.03E-01 |
| TMEM50B     | 0.00 | 5.01E-01 | 0.65  | 2.57E-01 | -0.84 | 7.99E-01 |
| CIAPIN1     | 0.00 | 5.01E-01 | 0.16  | 4.37E-01 | -0.87 | 8.07E-01 |
| CYP19A1     | 0.00 | 5.01E-01 | -0.75 | 7.72E-01 | -0.99 | 8.39E-01 |
| TBL1XR1     | 0.00 | 5.01E-01 | -0.91 | 8.19E-01 | -0.63 | 7.35E-01 |
| CFDP1       | 0.00 | 5.01E-01 | 0.72  | 2.37E-01 | 0.31  | 3.77E-01 |
| ZNF281      | 0.00 | 5.01E-01 | 1.23  | 1.10E-01 | 0.72  | 2.35E-01 |
| GXYLT2      | 0.00 | 5.01E-01 | -0.29 | 6.14E-01 | -0.19 | 5.76E-01 |
| CXADR       | 0.00 | 5.01E-01 | -0.60 | 7.26E-01 | -0.09 | 5.36E-01 |
| GH2         | 0.00 | 5.01E-01 | -1.06 | 8.55E-01 | -0.18 | 5.70E-01 |
| VCPIP1      | 0.00 | 5.02E-01 | 0.32  | 3.73E-01 | -1.00 | 8.41E-01 |
| SRM         | 0.00 | 5.02E-01 | 1.07  | 1.42E-01 | -0.12 | 5.47E-01 |
| ZNF404      | 0.00 | 5.02E-01 | 0.05  | 4.80E-01 | -0.70 | 7.58E-01 |
| TBX2        | 0.00 | 5.02E-01 | -0.37 | 6.45E-01 | -0.29 | 6.16E-01 |
| TSNAX-DISC1 | 0.00 | 5.02E-01 | 0.32  | 3.76E-01 | 0.49  | 3.13E-01 |
| DNAJC10     | 0.00 | 5.02E-01 | 0.80  | 2.11E-01 | -1.28 | 8.99E-01 |

|          |       |          |       |          |       |          |
|----------|-------|----------|-------|----------|-------|----------|
| CD14     | 0.00  | 5.02E-01 | -0.35 | 6.37E-01 | -0.62 | 7.32E-01 |
| KCNIP4   | 0.00  | 5.02E-01 | 1.28  | 1.00E-01 | -1.68 | 9.54E-01 |
| UMODL1   | 0.00  | 5.02E-01 | 0.71  | 2.38E-01 | -1.29 | 9.02E-01 |
| C7orf61  | 0.00  | 5.02E-01 | -0.24 | 5.95E-01 | -1.31 | 9.05E-01 |
| RNF113B  | 0.00  | 5.02E-01 | -0.41 | 6.60E-01 | -0.64 | 7.38E-01 |
| MAFK     | 0.00  | 5.02E-01 | -0.52 | 6.97E-01 | 1.12  | 1.32E-01 |
| WDR75    | 0.00  | 5.02E-01 | 0.08  | 4.68E-01 | 0.95  | 1.71E-01 |
| DOK6     | -0.01 | 5.02E-01 | -0.04 | 5.15E-01 | -0.52 | 7.00E-01 |
| SNRNP70  | -0.01 | 5.02E-01 | 1.83  | 3.33E-02 | -0.67 | 7.48E-01 |
| TMEM79   | -0.01 | 5.02E-01 | 0.51  | 3.07E-01 | -0.78 | 7.82E-01 |
| STYK1    | -0.01 | 5.02E-01 | -0.59 | 7.21E-01 | -0.45 | 6.75E-01 |
| C5orf34  | -0.01 | 5.02E-01 | 1.03  | 1.51E-01 | -1.34 | 9.09E-01 |
| PPP1R14A | -0.01 | 5.02E-01 | 0.70  | 2.41E-01 | -1.82 | 9.66E-01 |
| ZNF397   | -0.01 | 5.02E-01 | -1.43 | 9.24E-01 | 2.07  | 1.94E-02 |
| LRRTM2   | -0.01 | 5.03E-01 | -0.18 | 5.71E-01 | -0.84 | 7.99E-01 |
| TMEM248  | -0.01 | 5.03E-01 | 0.43  | 3.33E-01 | 0.58  | 2.82E-01 |
| BVES     | -0.01 | 5.03E-01 | -0.23 | 5.92E-01 | -0.49 | 6.87E-01 |
| ZRSR1    | -0.01 | 5.03E-01 | -0.37 | 6.42E-01 | 1.54  | 6.20E-02 |
| OR4D1    | -0.01 | 5.03E-01 | -0.06 | 5.24E-01 | -1.14 | 8.73E-01 |
| PKN1     | -0.01 | 5.03E-01 | -0.15 | 5.58E-01 | -1.29 | 9.02E-01 |
| JAM2     | -0.01 | 5.03E-01 | -0.05 | 5.20E-01 | 0.20  | 4.22E-01 |
| FAM91A1  | -0.01 | 5.03E-01 | -0.34 | 6.34E-01 | -0.59 | 7.23E-01 |
| TMPRSS9  | -0.01 | 5.03E-01 | 0.25  | 4.02E-01 | -1.80 | 9.64E-01 |
| ANKRD30B | -0.01 | 5.03E-01 | -0.13 | 5.51E-01 | -0.23 | 5.91E-01 |
| LRRC59   | -0.01 | 5.03E-01 | -0.12 | 5.46E-01 | -0.96 | 8.31E-01 |
| LDLRAD2  | -0.01 | 5.03E-01 | -0.15 | 5.59E-01 | -0.52 | 6.97E-01 |
| PLGRKT   | -0.01 | 5.03E-01 | 1.00  | 1.60E-01 | 1.39  | 8.25E-02 |
| CD163    | -0.01 | 5.03E-01 | -0.04 | 5.16E-01 | 1.12  | 1.31E-01 |
| TPBGL    | -0.01 | 5.03E-01 | 0.11  | 4.58E-01 | -1.56 | 9.40E-01 |
| C7orf76  | -0.01 | 5.03E-01 | 1.58  | 5.75E-02 | -1.23 | 8.90E-01 |
| USP2     | -0.01 | 5.03E-01 | 0.06  | 4.77E-01 | 0.50  | 3.10E-01 |

|          |       |          |       |          |       |          |
|----------|-------|----------|-------|----------|-------|----------|
| SLC9A3R1 | -0.01 | 5.03E-01 | -0.28 | 6.09E-01 | -0.21 | 5.83E-01 |
| ZNF207   | -0.01 | 5.03E-01 | 2.09  | 1.81E-02 | -0.16 | 5.65E-01 |
| CIB3     | -0.01 | 5.03E-01 | 0.07  | 4.72E-01 | -0.43 | 6.66E-01 |
| MVK      | -0.01 | 5.03E-01 | 0.50  | 3.10E-01 | -1.72 | 9.58E-01 |
| F12      | -0.01 | 5.04E-01 | 0.07  | 4.74E-01 | -0.53 | 7.01E-01 |
| NR2F6    | -0.01 | 5.04E-01 | -0.41 | 6.60E-01 | -0.92 | 8.21E-01 |
| SLC26A5  | -0.01 | 5.04E-01 | -0.41 | 6.60E-01 | -0.54 | 7.04E-01 |
| PHF20L1  | -0.01 | 5.04E-01 | -0.33 | 6.31E-01 | 0.74  | 2.29E-01 |
| OSM      | -0.01 | 5.04E-01 | 2.05  | 2.00E-02 | 0.54  | 2.96E-01 |
| B3GNT6   | -0.01 | 5.04E-01 | 0.86  | 1.94E-01 | 0.61  | 2.71E-01 |
| SNAP23   | -0.01 | 5.04E-01 | 0.92  | 1.78E-01 | -1.30 | 9.03E-01 |
| SSB      | -0.01 | 5.04E-01 | 0.12  | 4.53E-01 | 0.53  | 2.99E-01 |
| PPAT     | -0.01 | 5.04E-01 | 0.90  | 1.85E-01 | -0.48 | 6.84E-01 |
| FXN      | -0.01 | 5.04E-01 | -0.22 | 5.89E-01 | -0.59 | 7.23E-01 |
| RPL7     | -0.01 | 5.04E-01 | -0.67 | 7.47E-01 | 0.75  | 2.27E-01 |
| NRBP1    | -0.01 | 5.04E-01 | 0.19  | 4.24E-01 | 1.81  | 3.54E-02 |
| PDIA5    | -0.01 | 5.04E-01 | 0.50  | 3.08E-01 | -0.72 | 7.64E-01 |
| SMCR8    | -0.01 | 5.04E-01 | -0.09 | 5.34E-01 | -1.00 | 8.41E-01 |
| CHEK2    | -0.01 | 5.04E-01 | 0.56  | 2.88E-01 | -1.10 | 8.63E-01 |
| FBXO34   | -0.01 | 5.04E-01 | -0.18 | 5.70E-01 | 0.51  | 3.06E-01 |
| DSPP     | -0.01 | 5.04E-01 | -0.48 | 6.84E-01 | 0.36  | 3.61E-01 |
| FBXO24   | -0.01 | 5.04E-01 | 0.58  | 2.82E-01 | 0.55  | 2.91E-01 |
| BRCA1    | -0.01 | 5.04E-01 | -1.04 | 8.50E-01 | 0.51  | 3.04E-01 |
| MEFV     | -0.01 | 5.04E-01 | -0.94 | 8.27E-01 | -0.30 | 6.17E-01 |
| DTX1     | -0.01 | 5.04E-01 | 0.05  | 4.80E-01 | -0.84 | 7.99E-01 |
| CNTRL    | -0.01 | 5.05E-01 | -0.98 | 8.37E-01 | 0.09  | 4.63E-01 |
| DNMT3L   | -0.01 | 5.05E-01 | 0.75  | 2.27E-01 | -0.32 | 6.27E-01 |
| DOHH     | -0.01 | 5.05E-01 | 1.19  | 1.18E-01 | 2.49  | 6.42E-03 |
| TBCD     | -0.01 | 5.05E-01 | -0.31 | 6.21E-01 | -0.39 | 6.50E-01 |
| NRD1     | -0.01 | 5.05E-01 | -1.23 | 8.90E-01 | 0.48  | 3.17E-01 |
| RBX1     | -0.01 | 5.05E-01 | 0.85  | 1.98E-01 | 0.08  | 4.67E-01 |



|                |       |          |       |          |       |          |
|----------------|-------|----------|-------|----------|-------|----------|
| SART3          | -0.01 | 5.05E-01 | 0.12  | 4.53E-01 | -0.19 | 5.75E-01 |
| CCDC182        | -0.01 | 5.05E-01 | -0.16 | 5.63E-01 | -1.68 | 9.54E-01 |
| ABTB1          | -0.01 | 5.05E-01 | -0.39 | 6.53E-01 | -0.51 | 6.94E-01 |
| TMEM189-UBE2V1 | -0.01 | 5.05E-01 | -0.41 | 6.60E-01 | 0.01  | 4.95E-01 |
| TMEM189        | -0.01 | 5.05E-01 | -0.41 | 6.60E-01 | 0.01  | 4.95E-01 |
| SLC40A1        | -0.01 | 5.05E-01 | -0.90 | 8.16E-01 | 0.47  | 3.20E-01 |
| EPHA4          | -0.01 | 5.05E-01 | 0.71  | 2.40E-01 | 2.69  | 3.55E-03 |
| OR5J2          | -0.01 | 5.05E-01 | -0.95 | 8.30E-01 | 0.59  | 2.78E-01 |
| RAP1A          | -0.01 | 5.05E-01 | -0.23 | 5.89E-01 | -0.46 | 6.78E-01 |
| SHD            | -0.01 | 5.05E-01 | -0.77 | 7.80E-01 | 0.02  | 4.91E-01 |
| SH3RF2         | -0.01 | 5.06E-01 | -0.23 | 5.92E-01 | 1.50  | 6.65E-02 |
| CRB3           | -0.01 | 5.06E-01 | -1.42 | 9.22E-01 | 0.04  | 4.84E-01 |
| SLC35C2        | -0.01 | 5.06E-01 | -1.72 | 9.58E-01 | 0.22  | 4.14E-01 |
| KNCN           | -0.01 | 5.06E-01 | -0.30 | 6.19E-01 | 0.13  | 4.49E-01 |
| UHRF1BP1L      | -0.01 | 5.06E-01 | 0.50  | 3.07E-01 | 0.11  | 4.58E-01 |
| SLC25A16       | -0.01 | 5.06E-01 | -1.43 | 9.23E-01 | 0.42  | 3.38E-01 |
| TMPRSS11BNL    | -0.01 | 5.06E-01 | -0.92 | 8.21E-01 | 0.04  | 4.85E-01 |
| HOOK1          | -0.01 | 5.06E-01 | 0.30  | 3.84E-01 | -1.21 | 8.87E-01 |
| CELF6          | -0.01 | 5.06E-01 | 0.32  | 3.75E-01 | 0.32  | 3.75E-01 |
| PRAC1          | -0.02 | 5.06E-01 | -0.11 | 5.45E-01 | -0.56 | 7.14E-01 |
| CABIN1         | -0.02 | 5.06E-01 | -1.14 | 8.73E-01 | 0.00  | 4.98E-01 |
| CARD14         | -0.02 | 5.06E-01 | -1.32 | 9.06E-01 | 0.33  | 3.71E-01 |
| PHF23          | -0.02 | 5.06E-01 | -0.61 | 7.29E-01 | -0.33 | 6.28E-01 |
| NUAK1          | -0.02 | 5.06E-01 | -0.41 | 6.59E-01 | -0.89 | 8.12E-01 |
| GDF11          | -0.02 | 5.06E-01 | -0.08 | 5.33E-01 | -0.95 | 8.29E-01 |
| RBP7           | -0.02 | 5.06E-01 | -0.12 | 5.46E-01 | 1.63  | 5.19E-02 |
| GUCY2C         | -0.02 | 5.06E-01 | -0.84 | 8.01E-01 | 0.50  | 3.10E-01 |
| LRRC24         | -0.02 | 5.06E-01 | 0.77  | 2.22E-01 | -0.02 | 5.07E-01 |
| TFB2M          | -0.02 | 5.06E-01 | 0.84  | 1.99E-01 | -1.86 | 9.69E-01 |
| OTUB2          | -0.02 | 5.06E-01 | -0.87 | 8.08E-01 | 1.33  | 9.13E-02 |
| USP16          | -0.02 | 5.06E-01 | 0.06  | 4.78E-01 | -1.23 | 8.91E-01 |

|            |       |          |       |          |       |          |
|------------|-------|----------|-------|----------|-------|----------|
| RNASE7     | -0.02 | 5.07E-01 | 0.64  | 2.60E-01 | 0.43  | 3.34E-01 |
| H2AFY      | -0.02 | 5.07E-01 | -0.07 | 5.30E-01 | 0.69  | 2.45E-01 |
| SLC22A18AS | -0.02 | 5.07E-01 | -0.30 | 6.18E-01 | 0.15  | 4.39E-01 |
| KRTAP10-8  | -0.02 | 5.07E-01 | -1.26 | 8.95E-01 | 1.05  | 1.46E-01 |
| RHBDL3     | -0.02 | 5.07E-01 | 0.89  | 1.88E-01 | -0.73 | 7.67E-01 |
| RNF186     | -0.02 | 5.07E-01 | 0.48  | 3.14E-01 | -0.04 | 5.16E-01 |
| TSGA10     | -0.02 | 5.07E-01 | -0.35 | 6.37E-01 | 0.15  | 4.40E-01 |
| FOXR1      | -0.02 | 5.07E-01 | 0.27  | 3.92E-01 | 0.03  | 4.88E-01 |
| ROPN1B     | -0.02 | 5.07E-01 | 1.87  | 3.08E-02 | 0.51  | 3.03E-01 |
| WEE2       | -0.02 | 5.07E-01 | -0.80 | 7.90E-01 | 0.36  | 3.59E-01 |
| METTL23    | -0.02 | 5.07E-01 | 1.34  | 9.07E-02 | -0.66 | 7.47E-01 |
| GEN1       | -0.02 | 5.07E-01 | -0.60 | 7.27E-01 | 2.77  | 2.77E-03 |
| RUNX1T1    | -0.02 | 5.07E-01 | -0.06 | 5.23E-01 | -1.23 | 8.91E-01 |
| EGR2       | -0.02 | 5.07E-01 | -0.53 | 7.04E-01 | 1.72  | 4.31E-02 |
| PHTF1      | -0.02 | 5.07E-01 | -0.12 | 5.47E-01 | -1.02 | 8.47E-01 |
| BHMT2      | -0.02 | 5.07E-01 | -0.60 | 7.25E-01 | 0.01  | 4.97E-01 |
| PDGFRB     | -0.02 | 5.07E-01 | -0.08 | 5.31E-01 | -0.70 | 7.59E-01 |
| ZNF600     | -0.02 | 5.07E-01 | 1.00  | 1.58E-01 | 0.36  | 3.60E-01 |
| MRPS28     | -0.02 | 5.07E-01 | -0.07 | 5.27E-01 | 0.00  | 4.98E-01 |
| SULT1C4    | -0.02 | 5.07E-01 | 1.63  | 5.12E-02 | 0.47  | 3.20E-01 |
| CACNG4     | -0.02 | 5.07E-01 | 0.11  | 4.57E-01 | 0.12  | 4.52E-01 |
| C5orf28    | -0.02 | 5.07E-01 | 1.05  | 1.46E-01 | -0.92 | 8.21E-01 |
| TRIM35     | -0.02 | 5.08E-01 | 0.44  | 3.30E-01 | 0.22  | 4.14E-01 |
| GRAP2      | -0.02 | 5.08E-01 | -0.88 | 8.11E-01 | 0.47  | 3.20E-01 |
| INO80      | -0.02 | 5.08E-01 | 0.58  | 2.83E-01 | -1.07 | 8.57E-01 |
| SOD3       | -0.02 | 5.08E-01 | -0.12 | 5.47E-01 | -0.29 | 6.13E-01 |
| FAM212B    | -0.02 | 5.08E-01 | -0.64 | 7.38E-01 | -0.23 | 5.91E-01 |
| TECRL      | -0.02 | 5.08E-01 | -1.73 | 9.58E-01 | 0.69  | 2.46E-01 |
| NAPRT1     | -0.02 | 5.08E-01 | -0.06 | 5.24E-01 | 1.14  | 1.26E-01 |
| EFR3A      | -0.02 | 5.08E-01 | -1.44 | 9.25E-01 | 0.74  | 2.31E-01 |
| ARHGEF40   | -0.02 | 5.08E-01 | 1.92  | 2.72E-02 | -0.28 | 6.12E-01 |

|               |       |          |       |          |       |          |
|---------------|-------|----------|-------|----------|-------|----------|
| MAGEF1        | -0.02 | 5.08E-01 | 0.59  | 2.77E-01 | 2.14  | 1.61E-02 |
| EEPD1         | -0.02 | 5.09E-01 | -0.07 | 5.28E-01 | -0.17 | 5.69E-01 |
| FNDC4         | -0.02 | 5.09E-01 | 0.26  | 3.99E-01 | 1.64  | 5.02E-02 |
| SMYD3         | -0.02 | 5.09E-01 | 0.10  | 4.59E-01 | 0.06  | 4.77E-01 |
| GATA3         | -0.02 | 5.09E-01 | -0.12 | 5.48E-01 | 0.98  | 1.63E-01 |
| RP11-195F19.5 | -0.02 | 5.09E-01 | -1.21 | 8.87E-01 | 0.67  | 2.50E-01 |
| GOLGA8B       | -0.02 | 5.09E-01 | 0.33  | 3.69E-01 | 0.70  | 2.43E-01 |
| LPAR6         | -0.02 | 5.09E-01 | -0.83 | 7.95E-01 | 0.74  | 2.30E-01 |
| PIBF1         | -0.02 | 5.09E-01 | 0.10  | 4.60E-01 | 0.35  | 3.62E-01 |
| C10orf113     | -0.02 | 5.09E-01 | -0.75 | 7.72E-01 | 2.06  | 1.98E-02 |
| DIAPH1        | -0.02 | 5.09E-01 | 0.64  | 2.61E-01 | -0.86 | 8.05E-01 |
| DBP           | -0.02 | 5.09E-01 | -1.50 | 9.34E-01 | 0.42  | 3.37E-01 |
| PET112        | -0.02 | 5.09E-01 | -0.62 | 7.31E-01 | 1.02  | 1.55E-01 |
| SYNPO2L       | -0.02 | 5.09E-01 | -0.61 | 7.29E-01 | -0.12 | 5.47E-01 |
| RPL18A        | -0.02 | 5.09E-01 | -0.94 | 8.27E-01 | -0.18 | 5.72E-01 |
| ABCC3         | -0.02 | 5.09E-01 | 0.79  | 2.15E-01 | -0.98 | 8.36E-01 |
| CAPN11        | -0.02 | 5.09E-01 | -1.68 | 9.53E-01 | 0.55  | 2.92E-01 |
| ANKRD40       | -0.02 | 5.10E-01 | -0.10 | 5.39E-01 | -0.71 | 7.60E-01 |
| ZNF490        | -0.02 | 5.10E-01 | 0.17  | 4.33E-01 | -0.27 | 6.06E-01 |
| ODF3B         | -0.02 | 5.10E-01 | -1.47 | 9.30E-01 | 0.97  | 1.65E-01 |
| LPCAT2        | -0.02 | 5.10E-01 | -0.98 | 8.36E-01 | -0.66 | 7.47E-01 |
| URGCP         | -0.02 | 5.10E-01 | -0.20 | 5.78E-01 | -0.48 | 6.86E-01 |
| CCDC155       | -0.02 | 5.10E-01 | -0.87 | 8.08E-01 | 1.15  | 1.25E-01 |
| CLK1          | -0.03 | 5.10E-01 | 0.85  | 1.97E-01 | -1.88 | 9.70E-01 |
| TRADD         | -0.03 | 5.10E-01 | -1.89 | 9.71E-01 | 0.42  | 3.38E-01 |
| MGAM          | -0.03 | 5.10E-01 | 0.27  | 3.94E-01 | -0.51 | 6.97E-01 |
| ARHGAP21      | -0.03 | 5.10E-01 | 1.08  | 1.41E-01 | -1.45 | 9.26E-01 |
| SEH1L         | -0.03 | 5.10E-01 | -0.56 | 7.12E-01 | -0.72 | 7.64E-01 |
| ZC3H4         | -0.03 | 5.10E-01 | -0.09 | 5.36E-01 | 0.10  | 4.62E-01 |
| RHOV          | -0.03 | 5.10E-01 | -0.12 | 5.49E-01 | -0.38 | 6.47E-01 |
| ACVR1C        | -0.03 | 5.10E-01 | 1.35  | 8.90E-02 | 0.17  | 4.31E-01 |

|            |       |          |       |          |       |          |
|------------|-------|----------|-------|----------|-------|----------|
| VPS4B      | -0.03 | 5.10E-01 | -2.45 | 9.93E-01 | 0.91  | 1.80E-01 |
| SPRR1B     | -0.03 | 5.10E-01 | 0.08  | 4.68E-01 | -1.70 | 9.56E-01 |
| HCN4       | -0.03 | 5.10E-01 | -0.09 | 5.36E-01 | -0.81 | 7.91E-01 |
| OR7G1      | -0.03 | 5.10E-01 | 0.36  | 3.60E-01 | -0.36 | 6.41E-01 |
| GAL3ST3    | -0.03 | 5.10E-01 | 0.56  | 2.87E-01 | -1.57 | 9.42E-01 |
| PWWP2B     | -0.03 | 5.10E-01 | -1.14 | 8.73E-01 | 0.93  | 1.76E-01 |
| MEIG1      | -0.03 | 5.11E-01 | -0.17 | 5.67E-01 | 1.15  | 1.25E-01 |
| TTC9       | -0.03 | 5.11E-01 | -0.04 | 5.16E-01 | -0.52 | 6.97E-01 |
| KRTAP4-16P | -0.03 | 5.11E-01 | 1.53  | 6.27E-02 | -0.87 | 8.09E-01 |
| ZNF500     | -0.03 | 5.11E-01 | -1.32 | 9.06E-01 | 1.55  | 6.08E-02 |
| AIP        | -0.03 | 5.11E-01 | 0.75  | 2.26E-01 | -1.10 | 8.65E-01 |
| ZIK1       | -0.03 | 5.11E-01 | -0.44 | 6.70E-01 | -0.31 | 6.21E-01 |
| DUSP13     | -0.03 | 5.11E-01 | 0.93  | 1.76E-01 | 0.15  | 4.39E-01 |
| TES        | -0.03 | 5.11E-01 | -0.49 | 6.90E-01 | -0.90 | 8.15E-01 |
| TRIP11     | -0.03 | 5.11E-01 | 0.14  | 4.44E-01 | -1.16 | 8.77E-01 |
| KDM1A      | -0.03 | 5.11E-01 | 1.79  | 3.71E-02 | 0.99  | 1.60E-01 |
| SPRR2G     | -0.03 | 5.11E-01 | -1.87 | 9.69E-01 | -0.21 | 5.84E-01 |
| ST20       | -0.03 | 5.11E-01 | -0.44 | 6.71E-01 | -0.74 | 7.70E-01 |
| RFWD3      | -0.03 | 5.11E-01 | 0.92  | 1.80E-01 | -0.66 | 7.44E-01 |
| KLHL8      | -0.03 | 5.11E-01 | 0.02  | 4.93E-01 | -0.84 | 7.98E-01 |
| ASZ1       | -0.03 | 5.11E-01 | 0.07  | 4.73E-01 | -0.03 | 5.12E-01 |
| DIABLO     | -0.03 | 5.12E-01 | -0.13 | 5.52E-01 | -0.23 | 5.92E-01 |
| PGAP3      | -0.03 | 5.12E-01 | 0.86  | 1.96E-01 | -0.78 | 7.83E-01 |
| IKBKB      | -0.03 | 5.12E-01 | -0.07 | 5.27E-01 | -0.57 | 7.15E-01 |
| DEFB112    | -0.03 | 5.12E-01 | -1.34 | 9.11E-01 | -0.07 | 5.26E-01 |
| DEFB126    | -0.03 | 5.12E-01 | -0.39 | 6.51E-01 | -0.70 | 7.57E-01 |
| HSPA2      | -0.03 | 5.12E-01 | -0.08 | 5.33E-01 | -1.20 | 8.85E-01 |
| MBOAT7     | -0.03 | 5.12E-01 | -0.32 | 6.26E-01 | -0.68 | 7.53E-01 |
| FRMD3      | -0.03 | 5.12E-01 | -0.75 | 7.73E-01 | 2.35  | 9.44E-03 |
| ZNRF3      | -0.03 | 5.12E-01 | -0.25 | 6.01E-01 | 0.36  | 3.59E-01 |
| PCDHB11    | -0.03 | 5.12E-01 | -0.34 | 6.33E-01 | -1.12 | 8.68E-01 |

|          |       |          |       |          |       |          |
|----------|-------|----------|-------|----------|-------|----------|
| NUFIP2   | -0.03 | 5.12E-01 | 1.01  | 1.57E-01 | -0.10 | 5.40E-01 |
| EIF2AK2  | -0.03 | 5.12E-01 | 0.08  | 4.67E-01 | 0.53  | 3.00E-01 |
| LIG1     | -0.03 | 5.12E-01 | 0.49  | 3.13E-01 | -1.72 | 9.57E-01 |
| RANBP9   | -0.03 | 5.12E-01 | -1.21 | 8.86E-01 | -0.08 | 5.30E-01 |
| CPNE1    | -0.03 | 5.12E-01 | -0.56 | 7.12E-01 | -0.66 | 7.45E-01 |
| PPP1R14C | -0.03 | 5.13E-01 | -0.88 | 8.11E-01 | 0.67  | 2.50E-01 |
| USP6     | -0.03 | 5.13E-01 | 0.79  | 2.15E-01 | -0.54 | 7.05E-01 |
| C18orf25 | -0.03 | 5.13E-01 | 0.37  | 3.56E-01 | -1.05 | 8.53E-01 |
| B4GALT2  | -0.03 | 5.13E-01 | 0.83  | 2.03E-01 | -2.09 | 9.82E-01 |
| STK16    | -0.03 | 5.13E-01 | 0.67  | 2.53E-01 | -0.73 | 7.69E-01 |
| PYDC1    | -0.03 | 5.13E-01 | 1.00  | 1.59E-01 | -0.32 | 6.25E-01 |
| ACBD4    | -0.03 | 5.13E-01 | 0.24  | 4.04E-01 | -0.11 | 5.43E-01 |
| IDE      | -0.03 | 5.13E-01 | 0.18  | 4.28E-01 | -0.89 | 8.13E-01 |
| N6AMT1   | -0.03 | 5.13E-01 | 0.96  | 1.69E-01 | -0.50 | 6.92E-01 |
| DCAF17   | -0.03 | 5.13E-01 | -0.45 | 6.73E-01 | -0.44 | 6.70E-01 |
| NDUFA9   | -0.03 | 5.13E-01 | 0.46  | 3.22E-01 | -0.83 | 7.97E-01 |
| SUCO     | -0.03 | 5.13E-01 | -1.41 | 9.21E-01 | 0.17  | 4.32E-01 |
| MRPL15   | -0.03 | 5.13E-01 | -1.48 | 9.31E-01 | 0.65  | 2.58E-01 |
| PLRG1    | -0.03 | 5.13E-01 | 0.30  | 3.83E-01 | -1.10 | 8.64E-01 |
| CASC5    | -0.03 | 5.13E-01 | -0.17 | 5.66E-01 | -0.57 | 7.17E-01 |
| FOLR2    | -0.03 | 5.13E-01 | 1.80  | 3.61E-02 | 0.85  | 1.96E-01 |
| ALPK2    | -0.03 | 5.13E-01 | 0.16  | 4.35E-01 | -0.22 | 5.89E-01 |
| NPM2     | -0.03 | 5.14E-01 | 0.12  | 4.53E-01 | -0.58 | 7.20E-01 |
| INSC     | -0.03 | 5.14E-01 | 0.53  | 3.00E-01 | 0.05  | 4.82E-01 |
| EIF3J    | -0.03 | 5.14E-01 | 0.21  | 4.17E-01 | -0.41 | 6.59E-01 |
| CCDC93   | -0.03 | 5.14E-01 | 1.39  | 8.29E-02 | -1.57 | 9.42E-01 |
| MOGAT2   | -0.03 | 5.14E-01 | -0.06 | 5.26E-01 | -0.87 | 8.08E-01 |
| NTS      | -0.03 | 5.14E-01 | -0.50 | 6.90E-01 | 0.63  | 2.63E-01 |
| ARFGEF2  | -0.04 | 5.14E-01 | 0.15  | 4.40E-01 | -0.70 | 7.60E-01 |
| ATP5G1   | -0.04 | 5.14E-01 | -0.16 | 5.62E-01 | -1.20 | 8.86E-01 |
| HCAR1    | -0.04 | 5.14E-01 | 0.51  | 3.06E-01 | -1.31 | 9.05E-01 |

|          |       |          |       |          |       |          |
|----------|-------|----------|-------|----------|-------|----------|
| ECT2L    | -0.04 | 5.14E-01 | 0.12  | 4.52E-01 | 0.63  | 2.64E-01 |
| CSRP1    | -0.04 | 5.14E-01 | -0.94 | 8.27E-01 | -0.65 | 7.41E-01 |
| SYNCRIP  | -0.04 | 5.14E-01 | -0.09 | 5.36E-01 | -0.10 | 5.40E-01 |
| TOM1L1   | -0.04 | 5.14E-01 | 0.85  | 1.97E-01 | 1.37  | 8.58E-02 |
| TRIM63   | -0.04 | 5.14E-01 | -1.22 | 8.88E-01 | -0.17 | 5.66E-01 |
| USE1     | -0.04 | 5.14E-01 | -1.74 | 9.59E-01 | 0.22  | 4.13E-01 |
| C9orf47  | -0.04 | 5.15E-01 | -0.93 | 8.23E-01 | 0.28  | 3.89E-01 |
| ST14     | -0.04 | 5.15E-01 | -0.34 | 6.32E-01 | -1.25 | 8.94E-01 |
| TAL2     | -0.04 | 5.15E-01 | -1.19 | 8.84E-01 | 0.48  | 3.15E-01 |
| SLC25A47 | -0.04 | 5.15E-01 | 0.12  | 4.52E-01 | -1.64 | 9.49E-01 |
| FAM83B   | -0.04 | 5.15E-01 | 1.16  | 1.23E-01 | 0.70  | 2.42E-01 |
| ZNF259   | -0.04 | 5.15E-01 | -1.15 | 8.75E-01 | 0.78  | 2.19E-01 |
| DAO      | -0.04 | 5.15E-01 | -1.32 | 9.07E-01 | 1.23  | 1.08E-01 |
| ABHD6    | -0.04 | 5.15E-01 | -0.50 | 6.93E-01 | -0.96 | 8.33E-01 |
| CHD8     | -0.04 | 5.15E-01 | -0.27 | 6.07E-01 | 0.52  | 3.02E-01 |
| ZNF2     | -0.04 | 5.15E-01 | -0.16 | 5.62E-01 | -0.01 | 5.04E-01 |
| KXD1     | -0.04 | 5.15E-01 | 1.00  | 1.59E-01 | -1.01 | 8.44E-01 |
| THOC5    | -0.04 | 5.15E-01 | -0.48 | 6.86E-01 | 1.52  | 6.39E-02 |
| ELF5     | -0.04 | 5.15E-01 | -0.58 | 7.19E-01 | -0.29 | 6.14E-01 |
| RBBP5    | -0.04 | 5.15E-01 | 0.29  | 3.85E-01 | -0.73 | 7.67E-01 |
| ARPC1A   | -0.04 | 5.15E-01 | 0.23  | 4.07E-01 | -1.21 | 8.87E-01 |
| ZBED6CL  | -0.04 | 5.15E-01 | -0.96 | 8.32E-01 | 0.54  | 2.95E-01 |
| ARG2     | -0.04 | 5.15E-01 | 0.10  | 4.61E-01 | -1.19 | 8.83E-01 |
| NCKAP5L  | -0.04 | 5.15E-01 | -0.74 | 7.71E-01 | -0.26 | 6.02E-01 |
| GANAB    | -0.04 | 5.15E-01 | -0.22 | 5.88E-01 | -0.83 | 7.97E-01 |
| SGOL2    | -0.04 | 5.16E-01 | 0.82  | 2.05E-01 | 0.32  | 3.74E-01 |
| MRI1     | -0.04 | 5.16E-01 | -0.12 | 5.48E-01 | 0.51  | 3.05E-01 |
| PAIP1    | -0.04 | 5.16E-01 | 1.00  | 1.59E-01 | -1.31 | 9.04E-01 |
| DEFB110  | -0.04 | 5.16E-01 | -0.65 | 7.41E-01 | -0.10 | 5.39E-01 |
| SQLE     | -0.04 | 5.16E-01 | -0.28 | 6.10E-01 | -0.40 | 6.56E-01 |
| B4GALT1  | -0.04 | 5.16E-01 | 0.21  | 4.16E-01 | -0.84 | 8.01E-01 |

|          |       |          |       |          |       |          |
|----------|-------|----------|-------|----------|-------|----------|
| PAN2     | -0.04 | 5.16E-01 | 0.36  | 3.60E-01 | 1.76  | 3.88E-02 |
| GDF5OS   | -0.04 | 5.16E-01 | -0.09 | 5.34E-01 | -0.87 | 8.07E-01 |
| ERG      | -0.04 | 5.16E-01 | -0.11 | 5.45E-01 | -0.04 | 5.16E-01 |
| THEMIS2  | -0.04 | 5.16E-01 | 0.41  | 3.42E-01 | 0.85  | 1.97E-01 |
| ADAM23   | -0.04 | 5.16E-01 | -0.45 | 6.75E-01 | 0.84  | 2.01E-01 |
| PDCD4    | -0.04 | 5.16E-01 | 0.24  | 4.03E-01 | 0.42  | 3.39E-01 |
| UBE2I    | -0.04 | 5.16E-01 | 0.60  | 2.74E-01 | 0.01  | 4.97E-01 |
| TPT1     | -0.04 | 5.16E-01 | 0.83  | 2.03E-01 | 0.03  | 4.86E-01 |
| SHFM1    | -0.04 | 5.16E-01 | 2.01  | 2.22E-02 | -0.94 | 8.26E-01 |
| BTBD9    | -0.04 | 5.16E-01 | -2.06 | 9.80E-01 | 0.77  | 2.20E-01 |
| TTI2     | -0.04 | 5.16E-01 | -0.34 | 6.32E-01 | -0.75 | 7.74E-01 |
| ZBTB42   | -0.04 | 5.16E-01 | -0.87 | 8.09E-01 | 0.23  | 4.10E-01 |
| CYP26A1  | -0.04 | 5.16E-01 | 0.35  | 3.63E-01 | -0.94 | 8.27E-01 |
| MYBBP1A  | -0.04 | 5.16E-01 | 0.79  | 2.16E-01 | -1.47 | 9.29E-01 |
| ZNF3     | -0.04 | 5.17E-01 | 0.91  | 1.82E-01 | 0.73  | 2.32E-01 |
| SYK      | -0.04 | 5.17E-01 | 0.04  | 4.86E-01 | 1.46  | 7.18E-02 |
| ZNF474   | -0.04 | 5.17E-01 | -1.49 | 9.32E-01 | 0.60  | 2.73E-01 |
| ACOT13   | -0.04 | 5.17E-01 | -0.37 | 6.43E-01 | -0.72 | 7.64E-01 |
| KRT28    | -0.04 | 5.17E-01 | -0.46 | 6.78E-01 | 0.51  | 3.04E-01 |
| PDE1C    | -0.04 | 5.17E-01 | -1.37 | 9.14E-01 | -0.42 | 6.64E-01 |
| PXMP4    | -0.04 | 5.17E-01 | 0.48  | 3.14E-01 | -1.43 | 9.23E-01 |
| CAMK2D   | -0.04 | 5.17E-01 | 1.25  | 1.06E-01 | -0.74 | 7.70E-01 |
| BPTF     | -0.04 | 5.17E-01 | 0.03  | 4.86E-01 | -0.63 | 7.37E-01 |
| SPAG17   | -0.04 | 5.17E-01 | -1.05 | 8.54E-01 | -0.26 | 6.02E-01 |
| SCD5     | -0.04 | 5.17E-01 | -0.18 | 5.70E-01 | 0.16  | 4.36E-01 |
| LIN28B   | -0.04 | 5.17E-01 | -0.43 | 6.67E-01 | -1.20 | 8.86E-01 |
| CYP4X1   | -0.04 | 5.17E-01 | 0.26  | 3.97E-01 | -0.96 | 8.32E-01 |
| PTGDR    | -0.04 | 5.18E-01 | 0.64  | 2.60E-01 | -0.09 | 5.34E-01 |
| MCC      | -0.04 | 5.18E-01 | -0.46 | 6.78E-01 | 0.08  | 4.67E-01 |
| MTRNR2L8 | -0.04 | 5.18E-01 | 0.15  | 4.41E-01 | 2.17  | 1.50E-02 |
| UBAC2    | -0.04 | 5.18E-01 | -0.38 | 6.48E-01 | 0.51  | 3.05E-01 |

|               |       |          |       |          |       |          |
|---------------|-------|----------|-------|----------|-------|----------|
| ACBD5         | -0.05 | 5.18E-01 | -0.53 | 7.02E-01 | 0.84  | 2.00E-01 |
| HSF4          | -0.05 | 5.18E-01 | -0.54 | 7.04E-01 | -0.83 | 7.96E-01 |
| DENND4B       | -0.05 | 5.18E-01 | -0.07 | 5.29E-01 | 1.85  | 3.25E-02 |
| SNX9          | -0.05 | 5.18E-01 | -0.41 | 6.58E-01 | -0.72 | 7.65E-01 |
| KRBOX1        | -0.05 | 5.18E-01 | 0.30  | 3.80E-01 | 1.65  | 4.91E-02 |
| DYNLRB2       | -0.05 | 5.18E-01 | 0.20  | 4.20E-01 | -0.65 | 7.41E-01 |
| LAG3          | -0.05 | 5.18E-01 | 0.25  | 4.00E-01 | -1.37 | 9.15E-01 |
| AKR7A3        | -0.05 | 5.18E-01 | 0.08  | 4.68E-01 | -0.47 | 6.81E-01 |
| CLDN8         | -0.05 | 5.18E-01 | 0.84  | 2.00E-01 | -1.79 | 9.63E-01 |
| NRXN1         | -0.05 | 5.18E-01 | 0.47  | 3.18E-01 | 0.67  | 2.50E-01 |
| CTDSPL2       | -0.05 | 5.19E-01 | 0.07  | 4.72E-01 | -0.30 | 6.16E-01 |
| PSMB4         | -0.05 | 5.19E-01 | 0.25  | 4.00E-01 | 1.60  | 5.53E-02 |
| HPGD          | -0.05 | 5.19E-01 | 0.11  | 4.57E-01 | -1.14 | 8.73E-01 |
| ACTN1         | -0.05 | 5.19E-01 | 0.04  | 4.83E-01 | -0.88 | 8.11E-01 |
| APOBEC3H      | -0.05 | 5.19E-01 | 0.34  | 3.67E-01 | 0.11  | 4.56E-01 |
| MAP3K8        | -0.05 | 5.19E-01 | 0.11  | 4.56E-01 | -0.54 | 7.04E-01 |
| MED13         | -0.05 | 5.19E-01 | 0.43  | 3.32E-01 | -1.24 | 8.93E-01 |
| CCDC91        | -0.05 | 5.19E-01 | 0.01  | 4.96E-01 | 1.52  | 6.46E-02 |
| BCAT2         | -0.05 | 5.19E-01 | 0.06  | 4.76E-01 | -1.65 | 9.50E-01 |
| PMS2          | -0.05 | 5.19E-01 | -0.68 | 7.50E-01 | 1.21  | 1.13E-01 |
| NSUN4         | -0.05 | 5.19E-01 | -0.24 | 5.94E-01 | 1.30  | 9.66E-02 |
| DHX30         | -0.05 | 5.19E-01 | 0.36  | 3.59E-01 | 0.67  | 2.51E-01 |
| RPA1          | -0.05 | 5.19E-01 | 0.78  | 2.17E-01 | -1.77 | 9.61E-01 |
| CD5           | -0.05 | 5.19E-01 | -0.21 | 5.83E-01 | -0.20 | 5.80E-01 |
| NPR3          | -0.05 | 5.19E-01 | -0.47 | 6.80E-01 | -0.93 | 8.23E-01 |
| CCDC144A      | -0.05 | 5.19E-01 | -0.53 | 7.03E-01 | -0.48 | 6.83E-01 |
| RP11-219A15.1 | -0.05 | 5.19E-01 | -0.53 | 7.03E-01 | -0.48 | 6.83E-01 |
| C20orf26      | -0.05 | 5.20E-01 | -0.95 | 8.30E-01 | -0.20 | 5.81E-01 |
| IFITM10       | -0.05 | 5.20E-01 | -0.40 | 6.54E-01 | -0.48 | 6.86E-01 |
| HIVEP2        | -0.05 | 5.20E-01 | 0.35  | 3.62E-01 | -0.75 | 7.73E-01 |
| DOCK9         | -0.05 | 5.20E-01 | -0.22 | 5.85E-01 | -0.10 | 5.40E-01 |



|          |       |          |       |          |       |          |
|----------|-------|----------|-------|----------|-------|----------|
| ARHGEF10 | -0.05 | 5.20E-01 | 0.55  | 2.92E-01 | -1.34 | 9.10E-01 |
| CCL4     | -0.05 | 5.20E-01 | 1.29  | 9.87E-02 | -0.39 | 6.53E-01 |
| MTRFR1   | -0.05 | 5.20E-01 | -0.82 | 7.94E-01 | 0.15  | 4.39E-01 |
| SENP5    | -0.05 | 5.20E-01 | -1.21 | 8.87E-01 | 0.28  | 3.88E-01 |
| TMEM198  | -0.05 | 5.20E-01 | -0.09 | 5.34E-01 | -0.73 | 7.66E-01 |
| RECQL4   | -0.05 | 5.20E-01 | -0.07 | 5.29E-01 | -0.95 | 8.28E-01 |
| OR1D2    | -0.05 | 5.21E-01 | 0.52  | 3.02E-01 | 0.13  | 4.48E-01 |
| CAPRIN2  | -0.05 | 5.21E-01 | -0.46 | 6.79E-01 | 0.98  | 1.62E-01 |
| FGF4     | -0.05 | 5.21E-01 | 1.89  | 2.93E-02 | 0.93  | 1.76E-01 |
| ABCB6    | -0.05 | 5.21E-01 | -0.20 | 5.79E-01 | -0.59 | 7.21E-01 |
| EXOSC10  | -0.05 | 5.21E-01 | 0.26  | 3.97E-01 | -0.67 | 7.48E-01 |
| PARP4    | -0.05 | 5.21E-01 | 0.75  | 2.26E-01 | 0.43  | 3.35E-01 |
| LRP8     | -0.05 | 5.21E-01 | 1.52  | 6.39E-02 | -0.61 | 7.31E-01 |
| TULP2    | -0.05 | 5.21E-01 | -1.04 | 8.51E-01 | -0.25 | 6.00E-01 |
| ZNF211   | -0.05 | 5.21E-01 | 0.55  | 2.91E-01 | -1.51 | 9.34E-01 |
| ITGAE    | -0.05 | 5.21E-01 | -0.79 | 7.84E-01 | 1.30  | 9.63E-02 |
| MLK4     | -0.05 | 5.21E-01 | 1.06  | 1.45E-01 | -0.69 | 7.55E-01 |
| HHAT     | -0.05 | 5.21E-01 | 0.37  | 3.56E-01 | -1.08 | 8.59E-01 |
| CAMK2B   | -0.05 | 5.21E-01 | 0.81  | 2.09E-01 | -0.88 | 8.11E-01 |
| C3orf79  | -0.05 | 5.21E-01 | -0.82 | 7.93E-01 | 1.16  | 1.24E-01 |
| GPSM2    | -0.05 | 5.22E-01 | 0.22  | 4.12E-01 | -0.25 | 6.00E-01 |
| TMEM38B  | -0.05 | 5.22E-01 | -1.34 | 9.09E-01 | 0.14  | 4.45E-01 |
| EMC2     | -0.05 | 5.22E-01 | -0.11 | 5.45E-01 | -0.82 | 7.95E-01 |
| AP3B1    | -0.05 | 5.22E-01 | -0.70 | 7.57E-01 | -0.10 | 5.40E-01 |
| EPHB4    | -0.05 | 5.22E-01 | 1.21  | 1.13E-01 | -0.91 | 8.20E-01 |
| SPN      | -0.05 | 5.22E-01 | -2.03 | 9.79E-01 | 0.54  | 2.94E-01 |
| KREMEN1  | -0.05 | 5.22E-01 | -0.07 | 5.29E-01 | -0.82 | 7.94E-01 |
| UGT8     | -0.05 | 5.22E-01 | 0.44  | 3.29E-01 | -1.01 | 8.43E-01 |
| TUBB3    | -0.05 | 5.22E-01 | 0.64  | 2.62E-01 | 0.34  | 3.66E-01 |
| MXD4     | -0.05 | 5.22E-01 | -0.03 | 5.12E-01 | -0.31 | 6.20E-01 |
| SPACA7   | -0.05 | 5.22E-01 | -1.35 | 9.11E-01 | 0.91  | 1.81E-01 |

|          |       |          |       |          |       |          |
|----------|-------|----------|-------|----------|-------|----------|
| RSG1     | -0.05 | 5.22E-01 | -0.42 | 6.61E-01 | -0.91 | 8.19E-01 |
| GOLGA8A  | -0.05 | 5.22E-01 | 0.29  | 3.84E-01 | 0.67  | 2.53E-01 |
| TNFRSF25 | -0.05 | 5.22E-01 | 0.47  | 3.20E-01 | -0.36 | 6.39E-01 |
| PAX7     | -0.06 | 5.22E-01 | -0.52 | 7.00E-01 | 0.70  | 2.43E-01 |
| PLK5     | -0.06 | 5.22E-01 | -0.53 | 7.00E-01 | -0.04 | 5.15E-01 |
| SZT2     | -0.06 | 5.22E-01 | 0.06  | 4.77E-01 | -0.71 | 7.61E-01 |
| PPP1R12B | -0.06 | 5.22E-01 | -0.55 | 7.09E-01 | -1.07 | 8.59E-01 |
| TMEM242  | -0.06 | 5.22E-01 | 0.46  | 3.23E-01 | 0.07  | 4.71E-01 |
| CHST14   | -0.06 | 5.22E-01 | -0.27 | 6.05E-01 | 1.26  | 1.05E-01 |
| PIGO     | -0.06 | 5.22E-01 | -1.36 | 9.14E-01 | 0.58  | 2.81E-01 |
| SMG5     | -0.06 | 5.22E-01 | 0.36  | 3.60E-01 | -0.85 | 8.02E-01 |
| KRT10    | -0.06 | 5.23E-01 | 0.61  | 2.70E-01 | 0.29  | 3.88E-01 |
| LECT2    | -0.06 | 5.23E-01 | -0.37 | 6.45E-01 | -0.94 | 8.27E-01 |
| COBLL1   | -0.06 | 5.23E-01 | 0.44  | 3.31E-01 | -2.17 | 9.85E-01 |
| USP53    | -0.06 | 5.23E-01 | -0.17 | 5.68E-01 | -1.22 | 8.89E-01 |
| SUMO4    | -0.06 | 5.23E-01 | -0.29 | 6.15E-01 | -0.17 | 5.67E-01 |
| CDK5R1   | -0.06 | 5.23E-01 | -0.26 | 6.02E-01 | -0.80 | 7.90E-01 |
| LRRC49   | -0.06 | 5.23E-01 | -0.11 | 5.44E-01 | -0.27 | 6.06E-01 |
| DAAM2    | -0.06 | 5.23E-01 | 0.77  | 2.20E-01 | -0.99 | 8.39E-01 |
| DNAJC24  | -0.06 | 5.23E-01 | -1.30 | 9.04E-01 | 0.51  | 3.06E-01 |
| DIP2B    | -0.06 | 5.23E-01 | 0.35  | 3.64E-01 | -1.42 | 9.22E-01 |
| PAPL     | -0.06 | 5.23E-01 | 0.59  | 2.78E-01 | 0.67  | 2.51E-01 |
| LGALS1   | -0.06 | 5.23E-01 | 0.23  | 4.09E-01 | -1.26 | 8.95E-01 |
| MROH2A   | -0.06 | 5.23E-01 | 1.33  | 9.24E-02 | -1.16 | 8.77E-01 |
| PLB1     | -0.06 | 5.23E-01 | -0.55 | 7.09E-01 | -1.12 | 8.68E-01 |
| LNP1     | -0.06 | 5.23E-01 | -0.13 | 5.51E-01 | -0.48 | 6.85E-01 |
| IL2RB    | -0.06 | 5.23E-01 | -0.25 | 5.98E-01 | 0.19  | 4.26E-01 |
| TMEM30C  | -0.06 | 5.23E-01 | -0.38 | 6.49E-01 | -0.30 | 6.17E-01 |
| DNAH2    | -0.06 | 5.23E-01 | 0.60  | 2.74E-01 | 0.10  | 4.62E-01 |
| FEZ1     | -0.06 | 5.23E-01 | 0.09  | 4.66E-01 | -0.30 | 6.19E-01 |
| EME1     | -0.06 | 5.23E-01 | 0.00  | 5.00E-01 | -1.05 | 8.52E-01 |

|         |       |          |       |          |       |          |
|---------|-------|----------|-------|----------|-------|----------|
| FAM83F  | -0.06 | 5.23E-01 | -0.95 | 8.28E-01 | 0.12  | 4.51E-01 |
| KLRC4   | -0.06 | 5.24E-01 | -0.92 | 8.22E-01 | 0.02  | 4.91E-01 |
| CHD1    | -0.06 | 5.24E-01 | 1.35  | 8.93E-02 | 1.51  | 6.50E-02 |
| ANP32A  | -0.06 | 5.24E-01 | 0.28  | 3.88E-01 | 0.06  | 4.78E-01 |
| TRPC6   | -0.06 | 5.24E-01 | -0.26 | 6.01E-01 | -1.08 | 8.59E-01 |
| SGCB    | -0.06 | 5.24E-01 | 1.05  | 1.48E-01 | -0.67 | 7.48E-01 |
| PRSS45  | -0.06 | 5.24E-01 | -1.36 | 9.12E-01 | 0.26  | 3.96E-01 |
| HP      | -0.06 | 5.24E-01 | -0.59 | 7.21E-01 | 0.64  | 2.60E-01 |
| MYH10   | -0.06 | 5.24E-01 | 0.10  | 4.61E-01 | -0.66 | 7.44E-01 |
| BPNT1   | -0.06 | 5.24E-01 | -0.35 | 6.37E-01 | -0.84 | 7.99E-01 |
| MPP7    | -0.06 | 5.24E-01 | 0.19  | 4.24E-01 | -0.05 | 5.19E-01 |
| FCN1    | -0.06 | 5.24E-01 | 0.23  | 4.08E-01 | -0.28 | 6.12E-01 |
| MXRA7   | -0.06 | 5.24E-01 | 0.66  | 2.54E-01 | -0.66 | 7.45E-01 |
| TMEM109 | -0.06 | 5.24E-01 | -1.32 | 9.07E-01 | 0.07  | 4.71E-01 |
| ZFYVE19 | -0.06 | 5.24E-01 | 0.48  | 3.14E-01 | -1.05 | 8.52E-01 |
| FAM105A | -0.06 | 5.24E-01 | -0.32 | 6.24E-01 | 0.25  | 4.03E-01 |
| ACRBP   | -0.06 | 5.24E-01 | -0.68 | 7.53E-01 | 0.55  | 2.90E-01 |
| POGZ    | -0.06 | 5.24E-01 | 0.17  | 4.34E-01 | 1.52  | 6.40E-02 |
| ZNF837  | -0.06 | 5.24E-01 | -0.71 | 7.60E-01 | 0.75  | 2.28E-01 |
| NEK9    | -0.06 | 5.24E-01 | 0.50  | 3.10E-01 | -1.19 | 8.83E-01 |
| INIP    | -0.06 | 5.25E-01 | -0.28 | 6.12E-01 | -1.34 | 9.10E-01 |
| TRIM34  | -0.06 | 5.25E-01 | 0.35  | 3.63E-01 | 0.38  | 3.52E-01 |
| COL5A2  | -0.06 | 5.25E-01 | -0.20 | 5.80E-01 | -0.42 | 6.64E-01 |
| YIPF7   | -0.06 | 5.25E-01 | -0.25 | 5.98E-01 | -0.79 | 7.84E-01 |
| EXOC5   | -0.06 | 5.25E-01 | -0.96 | 8.32E-01 | 0.52  | 3.03E-01 |
| VSX1    | -0.06 | 5.25E-01 | -0.99 | 8.39E-01 | 1.46  | 7.17E-02 |
| RALB    | -0.06 | 5.25E-01 | -0.34 | 6.33E-01 | -0.86 | 8.05E-01 |
| TAS2R16 | -0.06 | 5.25E-01 | 0.47  | 3.18E-01 | 1.80  | 3.58E-02 |
| GABRB2  | -0.06 | 5.25E-01 | -0.74 | 7.70E-01 | -0.15 | 5.58E-01 |
| DEDD    | -0.06 | 5.25E-01 | 1.23  | 1.10E-01 | 1.28  | 1.01E-01 |
| GGT6    | -0.06 | 5.25E-01 | -0.26 | 6.01E-01 | -1.09 | 8.62E-01 |

|         |       |          |       |          |       |          |
|---------|-------|----------|-------|----------|-------|----------|
| NFATC4  | -0.06 | 5.25E-01 | -0.88 | 8.11E-01 | -0.42 | 6.62E-01 |
| TSHZ3   | -0.06 | 5.25E-01 | 0.04  | 4.84E-01 | -0.85 | 8.04E-01 |
| DMAP1   | -0.06 | 5.25E-01 | -1.65 | 9.51E-01 | 0.78  | 2.18E-01 |
| BCR     | -0.06 | 5.25E-01 | -0.58 | 7.19E-01 | -0.39 | 6.50E-01 |
| OR10H5  | -0.06 | 5.25E-01 | 1.05  | 1.46E-01 | -0.81 | 7.90E-01 |
| C2orf40 | -0.06 | 5.25E-01 | 0.46  | 3.22E-01 | -1.22 | 8.89E-01 |
| ZBTB7C  | -0.06 | 5.25E-01 | 0.36  | 3.59E-01 | -0.36 | 6.40E-01 |
| SPTB    | -0.06 | 5.25E-01 | 0.15  | 4.42E-01 | -0.36 | 6.39E-01 |
| ALPK1   | -0.06 | 5.26E-01 | -0.49 | 6.86E-01 | 1.54  | 6.19E-02 |
| FOXS1   | -0.06 | 5.26E-01 | 0.53  | 2.99E-01 | -0.56 | 7.11E-01 |
| PKIB    | -0.06 | 5.26E-01 | 0.98  | 1.64E-01 | -1.11 | 8.67E-01 |
| FBXO36  | -0.06 | 5.26E-01 | -0.07 | 5.29E-01 | -1.12 | 8.68E-01 |
| GNA15   | -0.06 | 5.26E-01 | -0.40 | 6.54E-01 | 0.55  | 2.93E-01 |
| RAB14   | -0.06 | 5.26E-01 | -1.29 | 9.01E-01 | 0.24  | 4.04E-01 |
| PCCB    | -0.06 | 5.26E-01 | 0.93  | 1.76E-01 | -0.72 | 7.65E-01 |
| PCDHGA3 | -0.06 | 5.26E-01 | 0.55  | 2.92E-01 | 0.63  | 2.64E-01 |
| GAL3ST2 | -0.07 | 5.26E-01 | 0.40  | 3.43E-01 | -1.38 | 9.16E-01 |
| CDC20   | -0.07 | 5.26E-01 | 0.23  | 4.07E-01 | -0.37 | 6.45E-01 |
| SUN1    | -0.07 | 5.26E-01 | 0.38  | 3.52E-01 | -0.41 | 6.58E-01 |
| CLC     | -0.07 | 5.26E-01 | -0.23 | 5.92E-01 | -0.59 | 7.21E-01 |
| TACC3   | -0.07 | 5.26E-01 | 0.27  | 3.94E-01 | -1.95 | 9.75E-01 |
| COLCA1  | -0.07 | 5.26E-01 | 0.33  | 3.70E-01 | 1.07  | 1.41E-01 |
| C2orf78 | -0.07 | 5.26E-01 | 0.26  | 3.96E-01 | -0.85 | 8.03E-01 |
| LGALS13 | -0.07 | 5.26E-01 | -0.81 | 7.90E-01 | -0.52 | 7.00E-01 |
| MUC6    | -0.07 | 5.27E-01 | -0.36 | 6.40E-01 | -0.17 | 5.67E-01 |
| S100A6  | -0.07 | 5.27E-01 | -0.43 | 6.66E-01 | -0.48 | 6.86E-01 |
| C5orf55 | -0.07 | 5.27E-01 | 0.65  | 2.59E-01 | -1.35 | 9.11E-01 |
| HTR7    | -0.07 | 5.27E-01 | 0.06  | 4.77E-01 | 1.85  | 3.23E-02 |
| CTNNA1  | -0.07 | 5.27E-01 | -0.20 | 5.78E-01 | -0.56 | 7.11E-01 |
| GALT    | -0.07 | 5.27E-01 | -0.13 | 5.52E-01 | 0.54  | 2.95E-01 |
| KRT39   | -0.07 | 5.27E-01 | 0.50  | 3.08E-01 | 0.55  | 2.89E-01 |

|           |       |          |       |          |       |          |
|-----------|-------|----------|-------|----------|-------|----------|
| IL19      | -0.07 | 5.27E-01 | -0.28 | 6.10E-01 | 1.22  | 1.12E-01 |
| CYP2D6    | -0.07 | 5.27E-01 | -1.06 | 8.54E-01 | 0.40  | 3.44E-01 |
| PON2      | -0.07 | 5.27E-01 | 0.50  | 3.09E-01 | -0.82 | 7.94E-01 |
| GPATCH2   | -0.07 | 5.27E-01 | -0.94 | 8.27E-01 | 0.87  | 1.93E-01 |
| ATP5H     | -0.07 | 5.27E-01 | 0.26  | 3.97E-01 | 0.57  | 2.84E-01 |
| CCDC14    | -0.07 | 5.27E-01 | -0.72 | 7.64E-01 | 1.71  | 4.36E-02 |
| RPE65     | -0.07 | 5.27E-01 | 0.98  | 1.64E-01 | 1.39  | 8.20E-02 |
| PRIM1     | -0.07 | 5.27E-01 | 0.16  | 4.36E-01 | -1.25 | 8.94E-01 |
| C1orf53   | -0.07 | 5.27E-01 | -1.89 | 9.71E-01 | 0.68  | 2.49E-01 |
| UBR7      | -0.07 | 5.27E-01 | -0.58 | 7.17E-01 | -0.42 | 6.63E-01 |
| H1FOO     | -0.07 | 5.27E-01 | -1.30 | 9.03E-01 | 0.86  | 1.94E-01 |
| RIPK4     | -0.07 | 5.27E-01 | 0.10  | 4.61E-01 | -0.65 | 7.42E-01 |
| SPINK13   | -0.07 | 5.27E-01 | -0.61 | 7.29E-01 | 0.30  | 3.83E-01 |
| ALAD      | -0.07 | 5.28E-01 | 0.01  | 4.95E-01 | -1.04 | 8.52E-01 |
| LONP1     | -0.07 | 5.28E-01 | -0.18 | 5.73E-01 | 0.96  | 1.69E-01 |
| ITFG2     | -0.07 | 5.28E-01 | -0.11 | 5.44E-01 | 0.75  | 2.27E-01 |
| RSPH4A    | -0.07 | 5.28E-01 | 0.32  | 3.74E-01 | -0.14 | 5.54E-01 |
| LZTS1     | -0.07 | 5.28E-01 | -0.01 | 5.05E-01 | -0.08 | 5.33E-01 |
| C18orf63  | -0.07 | 5.28E-01 | 0.02  | 4.94E-01 | -1.04 | 8.51E-01 |
| ATR       | -0.07 | 5.28E-01 | -1.25 | 8.95E-01 | 0.29  | 3.87E-01 |
| ANKS3     | -0.07 | 5.28E-01 | -1.12 | 8.68E-01 | 1.67  | 4.70E-02 |
| KRT222    | -0.07 | 5.28E-01 | 0.04  | 4.82E-01 | 0.02  | 4.90E-01 |
| CHSY3     | -0.07 | 5.28E-01 | -0.01 | 5.05E-01 | 2.35  | 9.47E-03 |
| PADI3     | -0.07 | 5.28E-01 | -0.18 | 5.72E-01 | -0.62 | 7.31E-01 |
| RAB11FIP5 | -0.07 | 5.28E-01 | -0.17 | 5.66E-01 | -0.13 | 5.53E-01 |
| CYP1A2    | -0.07 | 5.28E-01 | -1.84 | 9.67E-01 | 0.96  | 1.68E-01 |
| INTU      | -0.07 | 5.28E-01 | 1.65  | 4.92E-02 | 0.40  | 3.46E-01 |
| PDC       | -0.07 | 5.28E-01 | 0.16  | 4.38E-01 | -1.74 | 9.59E-01 |
| NSUN7     | -0.07 | 5.28E-01 | -0.79 | 7.84E-01 | -1.01 | 8.45E-01 |
| ATP6V1G3  | -0.07 | 5.28E-01 | 0.07  | 4.71E-01 | 0.11  | 4.58E-01 |
| PPCDC     | -0.07 | 5.28E-01 | 0.29  | 3.84E-01 | 0.02  | 4.93E-01 |

|               |       |          |       |          |       |          |
|---------------|-------|----------|-------|----------|-------|----------|
| C1QL3         | -0.07 | 5.29E-01 | 0.27  | 3.95E-01 | -0.13 | 5.52E-01 |
| NCLN          | -0.07 | 5.29E-01 | -0.59 | 7.23E-01 | 1.43  | 7.59E-02 |
| GPR19         | -0.07 | 5.29E-01 | 0.19  | 4.23E-01 | -0.35 | 6.36E-01 |
| KCTD19        | -0.07 | 5.29E-01 | -1.63 | 9.49E-01 | 0.77  | 2.20E-01 |
| NT5M          | -0.07 | 5.29E-01 | -0.07 | 5.28E-01 | -1.14 | 8.73E-01 |
| C10orf11      | -0.07 | 5.29E-01 | -0.83 | 7.97E-01 | 0.18  | 4.30E-01 |
| C5orf63       | -0.07 | 5.29E-01 | 1.29  | 9.79E-02 | 0.28  | 3.88E-01 |
| CTSZ          | -0.07 | 5.29E-01 | -0.89 | 8.14E-01 | -0.51 | 6.96E-01 |
| KL            | -0.07 | 5.29E-01 | 0.40  | 3.43E-01 | -1.04 | 8.50E-01 |
| SMPD4         | -0.07 | 5.29E-01 | 1.22  | 1.12E-01 | 0.19  | 4.23E-01 |
| KCNK2         | -0.07 | 5.29E-01 | -0.46 | 6.78E-01 | -0.78 | 7.83E-01 |
| VNN1          | -0.07 | 5.29E-01 | 0.93  | 1.75E-01 | -0.48 | 6.86E-01 |
| ZNF451        | -0.07 | 5.29E-01 | -0.31 | 6.22E-01 | -0.46 | 6.78E-01 |
| ESD           | -0.07 | 5.30E-01 | 0.48  | 3.14E-01 | -1.39 | 9.18E-01 |
| ELP2          | -0.07 | 5.30E-01 | -0.63 | 7.35E-01 | 2.17  | 1.50E-02 |
| FCGR2A        | -0.07 | 5.30E-01 | 0.00  | 4.98E-01 | -0.76 | 7.75E-01 |
| EFCAB11       | -0.07 | 5.30E-01 | 0.63  | 2.65E-01 | 0.30  | 3.83E-01 |
| XKR4          | -0.07 | 5.30E-01 | 0.07  | 4.72E-01 | -0.90 | 8.16E-01 |
| KLRC4-KLRK1   | -0.07 | 5.30E-01 | -0.54 | 7.06E-01 | -0.09 | 5.37E-01 |
| DPH2          | -0.07 | 5.30E-01 | 0.99  | 1.61E-01 | -0.14 | 5.57E-01 |
| ZNF558        | -0.08 | 5.30E-01 | 0.97  | 1.67E-01 | -0.64 | 7.38E-01 |
| ETFB          | -0.08 | 5.30E-01 | -1.01 | 8.43E-01 | -0.27 | 6.05E-01 |
| ORAI1         | -0.08 | 5.30E-01 | -0.73 | 7.67E-01 | 0.65  | 2.58E-01 |
| PLCXD3        | -0.08 | 5.30E-01 | 0.32  | 3.76E-01 | -0.38 | 6.47E-01 |
| ATXN7         | -0.08 | 5.30E-01 | 0.35  | 3.64E-01 | 0.86  | 1.96E-01 |
| P2RX5-TAX1BP3 | -0.08 | 5.30E-01 | 0.46  | 3.21E-01 | -0.38 | 6.48E-01 |
| GRIA2         | -0.08 | 5.30E-01 | -0.31 | 6.24E-01 | -0.16 | 5.65E-01 |
| KLHL32        | -0.08 | 5.30E-01 | -1.00 | 8.41E-01 | 1.01  | 1.57E-01 |
| OVCH1-AS1     | -0.08 | 5.31E-01 | -0.14 | 5.55E-01 | -0.30 | 6.19E-01 |
| TPO           | -0.08 | 5.31E-01 | -0.61 | 7.29E-01 | -0.39 | 6.52E-01 |
| ELP6          | -0.08 | 5.31E-01 | 0.04  | 4.82E-01 | 0.80  | 2.13E-01 |

|          |       |          |       |          |       |          |
|----------|-------|----------|-------|----------|-------|----------|
| RWDD2A   | -0.08 | 5.31E-01 | 0.34  | 3.66E-01 | -1.01 | 8.43E-01 |
| LPAR2    | -0.08 | 5.31E-01 | -0.57 | 7.14E-01 | -0.56 | 7.11E-01 |
| GLT6D1   | -0.08 | 5.31E-01 | 1.07  | 1.43E-01 | -1.15 | 8.76E-01 |
| GOT1     | -0.08 | 5.31E-01 | -0.06 | 5.24E-01 | -0.38 | 6.49E-01 |
| RAI1     | -0.08 | 5.31E-01 | 2.18  | 1.47E-02 | 0.52  | 3.02E-01 |
| PRKG2    | -0.08 | 5.31E-01 | -0.10 | 5.38E-01 | 0.53  | 2.98E-01 |
| C2orf71  | -0.08 | 5.31E-01 | 2.24  | 1.27E-02 | 0.15  | 4.39E-01 |
| FGF11    | -0.08 | 5.31E-01 | -1.17 | 8.79E-01 | -0.27 | 6.06E-01 |
| NRF1     | -0.08 | 5.31E-01 | -0.25 | 5.98E-01 | 0.80  | 2.11E-01 |
| KIAA0391 | -0.08 | 5.31E-01 | 0.37  | 3.55E-01 | -0.07 | 5.29E-01 |
| GVQW1    | -0.08 | 5.31E-01 | -0.65 | 7.43E-01 | -0.31 | 6.20E-01 |
| IFRD1    | -0.08 | 5.31E-01 | -0.27 | 6.06E-01 | -0.56 | 7.12E-01 |
| DEFB131  | -0.08 | 5.31E-01 | -1.12 | 8.69E-01 | 0.05  | 4.81E-01 |
| FAM217B  | -0.08 | 5.31E-01 | -0.11 | 5.44E-01 | 0.39  | 3.47E-01 |
| OR1F1    | -0.08 | 5.31E-01 | -1.42 | 9.22E-01 | 0.22  | 4.12E-01 |
| ITPKB    | -0.08 | 5.31E-01 | -0.09 | 5.34E-01 | 0.37  | 3.55E-01 |
| PTGES    | -0.08 | 5.31E-01 | 0.83  | 2.03E-01 | -1.09 | 8.63E-01 |
| FBXO22   | -0.08 | 5.32E-01 | 1.07  | 1.42E-01 | -0.54 | 7.04E-01 |
| CCDC7    | -0.08 | 5.32E-01 | -0.54 | 7.04E-01 | 0.08  | 4.69E-01 |
| SPIDR    | -0.08 | 5.32E-01 | 0.21  | 4.17E-01 | 0.70  | 2.41E-01 |
| HPS4     | -0.08 | 5.32E-01 | 0.37  | 3.54E-01 | 0.42  | 3.39E-01 |
| COPB2    | -0.08 | 5.32E-01 | 2.18  | 1.47E-02 | 0.50  | 3.08E-01 |
| NTHL1    | -0.08 | 5.32E-01 | 0.30  | 3.81E-01 | -1.40 | 9.20E-01 |
| TAF12    | -0.08 | 5.32E-01 | 1.03  | 1.51E-01 | 0.58  | 2.82E-01 |
| TEX40    | -0.08 | 5.32E-01 | 0.14  | 4.43E-01 | 0.41  | 3.42E-01 |
| YY1AP1   | -0.08 | 5.32E-01 | 0.04  | 4.83E-01 | -0.31 | 6.23E-01 |
| TSPAN17  | -0.08 | 5.32E-01 | 0.81  | 2.08E-01 | 1.59  | 5.63E-02 |
| NDUFC1   | -0.08 | 5.32E-01 | 0.54  | 2.95E-01 | -1.98 | 9.76E-01 |
| PARP16   | -0.08 | 5.32E-01 | -0.97 | 8.35E-01 | 1.68  | 4.61E-02 |
| ZNF572   | -0.08 | 5.32E-01 | -0.61 | 7.30E-01 | 0.99  | 1.60E-01 |
| MFHAS1   | -0.08 | 5.32E-01 | -0.57 | 7.16E-01 | 1.24  | 1.07E-01 |

|               |       |          |       |          |       |          |
|---------------|-------|----------|-------|----------|-------|----------|
| ARHGEF37      | -0.08 | 5.32E-01 | -0.24 | 5.94E-01 | -0.04 | 5.14E-01 |
| ZBTB21        | -0.08 | 5.32E-01 | 0.14  | 4.43E-01 | -1.13 | 8.70E-01 |
| ARFGAP2       | -0.08 | 5.32E-01 | -0.39 | 6.53E-01 | -0.10 | 5.42E-01 |
| ROPN1         | -0.08 | 5.32E-01 | -1.40 | 9.19E-01 | 1.31  | 9.53E-02 |
| ADPRHL2       | -0.08 | 5.33E-01 | -0.35 | 6.39E-01 | 1.14  | 1.27E-01 |
| PCDHB7        | -0.08 | 5.33E-01 | -0.23 | 5.91E-01 | -1.27 | 8.98E-01 |
| ROCK2         | -0.08 | 5.33E-01 | -1.07 | 8.57E-01 | -0.52 | 6.99E-01 |
| VWC2          | -0.08 | 5.33E-01 | 0.20  | 4.21E-01 | -0.18 | 5.72E-01 |
| ATIC          | -0.08 | 5.33E-01 | -1.23 | 8.91E-01 | 0.18  | 4.28E-01 |
| VRTN          | -0.08 | 5.33E-01 | -0.83 | 7.97E-01 | 0.56  | 2.89E-01 |
| DHX29         | -0.08 | 5.33E-01 | -0.23 | 5.91E-01 | -0.42 | 6.62E-01 |
| CUTA          | -0.08 | 5.33E-01 | -0.67 | 7.50E-01 | -0.21 | 5.81E-01 |
| PCDHGB1       | -0.08 | 5.33E-01 | 0.60  | 2.75E-01 | 0.55  | 2.90E-01 |
| DKFZP761J1410 | -0.08 | 5.33E-01 | -0.07 | 5.30E-01 | -1.05 | 8.54E-01 |
| CEP250        | -0.08 | 5.33E-01 | -0.92 | 8.21E-01 | 0.02  | 4.91E-01 |
| DSEL          | -0.08 | 5.33E-01 | -0.26 | 6.01E-01 | -0.38 | 6.47E-01 |
| PPCS          | -0.08 | 5.33E-01 | 0.75  | 2.25E-01 | -0.19 | 5.74E-01 |
| MLC1          | -0.08 | 5.33E-01 | 0.51  | 3.05E-01 | -0.35 | 6.36E-01 |
| GDE1          | -0.08 | 5.33E-01 | 0.56  | 2.87E-01 | -1.17 | 8.78E-01 |
| PEX12         | -0.08 | 5.33E-01 | -1.42 | 9.22E-01 | 0.27  | 3.92E-01 |
| RNF40         | -0.08 | 5.33E-01 | -1.29 | 9.01E-01 | 0.80  | 2.12E-01 |
| UBE2Q2        | -0.08 | 5.34E-01 | 0.78  | 2.17E-01 | -0.49 | 6.86E-01 |
| MANEA         | -0.08 | 5.34E-01 | -0.54 | 7.07E-01 | -0.15 | 5.61E-01 |
| ZNF462        | -0.08 | 5.34E-01 | -0.07 | 5.27E-01 | 1.46  | 7.24E-02 |
| BMP8B         | -0.08 | 5.34E-01 | 0.38  | 3.53E-01 | -1.04 | 8.51E-01 |
| BPIFA2        | -0.08 | 5.34E-01 | 0.61  | 2.71E-01 | -0.96 | 8.31E-01 |
| DAZAP1        | -0.09 | 5.34E-01 | 0.34  | 3.68E-01 | 0.24  | 4.05E-01 |
| PCMTD2        | -0.09 | 5.34E-01 | 0.45  | 3.27E-01 | 1.31  | 9.59E-02 |
| KCNN1         | -0.09 | 5.34E-01 | 1.71  | 4.35E-02 | -0.21 | 5.81E-01 |
| ZNF790        | -0.09 | 5.34E-01 | -0.40 | 6.56E-01 | -0.32 | 6.25E-01 |
| CYP4A11       | -0.09 | 5.34E-01 | 0.04  | 4.84E-01 | 2.40  | 8.28E-03 |



|            |       |          |       |          |       |          |
|------------|-------|----------|-------|----------|-------|----------|
| LAMP5      | -0.09 | 5.34E-01 | -0.38 | 6.47E-01 | 1.21  | 1.13E-01 |
| TMEM45B    | -0.09 | 5.34E-01 | -0.45 | 6.73E-01 | -1.11 | 8.67E-01 |
| TSTA3      | -0.09 | 5.34E-01 | -0.46 | 6.78E-01 | 1.38  | 8.43E-02 |
| RNF170     | -0.09 | 5.34E-01 | -1.14 | 8.72E-01 | 1.40  | 8.15E-02 |
| ZNF100     | -0.09 | 5.35E-01 | 0.79  | 2.15E-01 | -0.16 | 5.62E-01 |
| FTSJ3      | -0.09 | 5.35E-01 | -0.55 | 7.09E-01 | -0.38 | 6.49E-01 |
| RIC8A      | -0.09 | 5.35E-01 | 0.53  | 2.96E-01 | -0.48 | 6.85E-01 |
| MS4A18     | -0.09 | 5.35E-01 | -0.51 | 6.97E-01 | 0.59  | 2.76E-01 |
| SLC10A4    | -0.09 | 5.35E-01 | -0.63 | 7.36E-01 | 0.08  | 4.68E-01 |
| CYP3A5     | -0.09 | 5.35E-01 | 0.06  | 4.75E-01 | -0.30 | 6.16E-01 |
| AGBL5      | -0.09 | 5.35E-01 | 1.36  | 8.63E-02 | 0.34  | 3.68E-01 |
| CREB3L4    | -0.09 | 5.35E-01 | -0.05 | 5.21E-01 | 1.72  | 4.31E-02 |
| KIAA1324L  | -0.09 | 5.35E-01 | 0.37  | 3.57E-01 | -1.57 | 9.41E-01 |
| WSCD2      | -0.09 | 5.35E-01 | 1.20  | 1.15E-01 | 0.13  | 4.46E-01 |
| ARF1       | -0.09 | 5.35E-01 | 0.45  | 3.26E-01 | -0.20 | 5.80E-01 |
| AP003774.4 | -0.09 | 5.35E-01 | -1.66 | 9.52E-01 | 0.89  | 1.86E-01 |
| NEUROD1    | -0.09 | 5.35E-01 | -0.37 | 6.45E-01 | -1.45 | 9.27E-01 |
| MED27      | -0.09 | 5.35E-01 | -1.12 | 8.69E-01 | -0.29 | 6.15E-01 |
| CLEC1B     | -0.09 | 5.35E-01 | 0.24  | 4.07E-01 | -1.51 | 9.34E-01 |
| GPR128     | -0.09 | 5.35E-01 | -1.16 | 8.77E-01 | 1.55  | 6.07E-02 |
| JUP        | -0.09 | 5.35E-01 | -0.38 | 6.50E-01 | 0.62  | 2.67E-01 |
| C14orf79   | -0.09 | 5.35E-01 | 0.46  | 3.21E-01 | -1.15 | 8.76E-01 |
| TIMP2      | -0.09 | 5.35E-01 | 0.13  | 4.49E-01 | 0.11  | 4.58E-01 |
| EFNB2      | -0.09 | 5.35E-01 | -0.25 | 5.99E-01 | -1.49 | 9.32E-01 |
| GABRA6     | -0.09 | 5.35E-01 | -0.15 | 5.59E-01 | -0.78 | 7.82E-01 |
| FGFR4      | -0.09 | 5.35E-01 | -0.49 | 6.88E-01 | -0.25 | 5.99E-01 |
| MYH11      | -0.09 | 5.36E-01 | 0.45  | 3.27E-01 | 0.29  | 3.86E-01 |
| ANKEF1     | -0.09 | 5.36E-01 | -0.22 | 5.88E-01 | -0.33 | 6.31E-01 |
| KIFC2      | -0.09 | 5.36E-01 | -0.11 | 5.44E-01 | -1.00 | 8.42E-01 |
| PCDHGB6    | -0.09 | 5.36E-01 | 1.06  | 1.43E-01 | -0.48 | 6.85E-01 |
| FBXL18     | -0.09 | 5.36E-01 | -0.31 | 6.22E-01 | 0.23  | 4.10E-01 |

|         |       |          |       |          |       |          |
|---------|-------|----------|-------|----------|-------|----------|
| PCDHGA2 | -0.09 | 5.36E-01 | 0.51  | 3.06E-01 | 0.60  | 2.76E-01 |
| FAT4    | -0.09 | 5.36E-01 | 0.65  | 2.57E-01 | -0.69 | 7.55E-01 |
| CCDC132 | -0.09 | 5.36E-01 | -0.49 | 6.89E-01 | -0.22 | 5.88E-01 |
| MIER3   | -0.09 | 5.36E-01 | 0.80  | 2.13E-01 | -0.43 | 6.65E-01 |
| ZSCAN30 | -0.09 | 5.36E-01 | -1.05 | 8.53E-01 | 2.06  | 1.95E-02 |
| PALB2   | -0.09 | 5.36E-01 | -0.14 | 5.55E-01 | -0.23 | 5.89E-01 |
| SLC27A6 | -0.09 | 5.36E-01 | -0.56 | 7.11E-01 | -0.03 | 5.13E-01 |
| RBM12   | -0.09 | 5.36E-01 | -0.52 | 6.97E-01 | -0.71 | 7.61E-01 |
| OR51G1  | -0.09 | 5.36E-01 | -0.56 | 7.11E-01 | -0.71 | 7.61E-01 |
| LPAR1   | -0.09 | 5.36E-01 | -0.88 | 8.11E-01 | -0.31 | 6.22E-01 |
| STARD5  | -0.09 | 5.36E-01 | 0.18  | 4.30E-01 | 0.72  | 2.35E-01 |
| SOWAHB  | -0.09 | 5.36E-01 | 1.00  | 1.59E-01 | -0.68 | 7.53E-01 |
| GNG10   | -0.09 | 5.36E-01 | 0.07  | 4.73E-01 | 0.30  | 3.81E-01 |
| MGAT3   | -0.09 | 5.37E-01 | -0.40 | 6.57E-01 | -0.09 | 5.35E-01 |
| SLC26A1 | -0.09 | 5.37E-01 | 0.28  | 3.88E-01 | 1.26  | 1.03E-01 |
| MAP3K5  | -0.09 | 5.37E-01 | 0.84  | 1.99E-01 | 0.08  | 4.69E-01 |
| MEPCE   | -0.09 | 5.37E-01 | 0.06  | 4.77E-01 | -0.92 | 8.21E-01 |
| LBH     | -0.09 | 5.37E-01 | -0.07 | 5.28E-01 | -0.49 | 6.87E-01 |
| MTDH    | -0.09 | 5.37E-01 | -0.07 | 5.28E-01 | 0.45  | 3.26E-01 |
| THBS4   | -0.09 | 5.37E-01 | -0.39 | 6.51E-01 | -0.49 | 6.89E-01 |
| TEK     | -0.09 | 5.37E-01 | -0.72 | 7.63E-01 | -0.48 | 6.83E-01 |
| UCP2    | -0.09 | 5.37E-01 | -0.30 | 6.20E-01 | 1.66  | 4.87E-02 |
| PGD     | -0.09 | 5.37E-01 | -0.48 | 6.86E-01 | 1.12  | 1.31E-01 |
| VPS26A  | -0.09 | 5.37E-01 | 0.23  | 4.10E-01 | 0.01  | 4.97E-01 |
| TESK2   | -0.09 | 5.37E-01 | -0.31 | 6.21E-01 | -1.17 | 8.79E-01 |
| DUSP10  | -0.09 | 5.37E-01 | -0.87 | 8.09E-01 | 1.35  | 8.89E-02 |
| SLC20A2 | -0.09 | 5.37E-01 | -0.70 | 7.57E-01 | -0.13 | 5.50E-01 |
| SDHD    | -0.09 | 5.37E-01 | -0.64 | 7.40E-01 | 0.29  | 3.86E-01 |
| MEGF8   | -0.09 | 5.37E-01 | -0.80 | 7.88E-01 | -0.24 | 5.94E-01 |
| MAT2A   | -0.09 | 5.37E-01 | 0.87  | 1.93E-01 | 0.14  | 4.43E-01 |
| KCTD18  | -0.09 | 5.37E-01 | -0.15 | 5.59E-01 | -0.14 | 5.55E-01 |

|          |       |          |       |          |       |          |
|----------|-------|----------|-------|----------|-------|----------|
| POU4F3   | -0.09 | 5.38E-01 | -0.90 | 8.15E-01 | 0.38  | 3.52E-01 |
| DIS3L    | -0.09 | 5.38E-01 | -0.40 | 6.54E-01 | 0.85  | 1.98E-01 |
| ZNF707   | -0.09 | 5.38E-01 | 1.30  | 9.70E-02 | -0.46 | 6.78E-01 |
| HK2      | -0.09 | 5.38E-01 | -0.22 | 5.86E-01 | 0.47  | 3.19E-01 |
| TAF1L    | -0.09 | 5.38E-01 | 0.85  | 1.97E-01 | 0.50  | 3.08E-01 |
| SAFB2    | -0.09 | 5.38E-01 | -0.30 | 6.17E-01 | 1.00  | 1.57E-01 |
| ATMIN    | -0.09 | 5.38E-01 | -0.79 | 7.85E-01 | -0.05 | 5.18E-01 |
| SAR1A    | -0.10 | 5.38E-01 | 0.20  | 4.22E-01 | 0.90  | 1.84E-01 |
| HELLS    | -0.10 | 5.38E-01 | -0.37 | 6.44E-01 | -0.06 | 5.24E-01 |
| TMEM154  | -0.10 | 5.38E-01 | -1.23 | 8.90E-01 | 0.72  | 2.37E-01 |
| TAL1     | -0.10 | 5.38E-01 | 0.54  | 2.95E-01 | -1.83 | 9.66E-01 |
| OSCAR    | -0.10 | 5.38E-01 | -0.38 | 6.47E-01 | 0.26  | 3.98E-01 |
| SBDS     | -0.10 | 5.38E-01 | 0.20  | 4.20E-01 | -0.30 | 6.17E-01 |
| EXOSC2   | -0.10 | 5.38E-01 | -1.07 | 8.58E-01 | -0.14 | 5.57E-01 |
| MGST2    | -0.10 | 5.38E-01 | -1.04 | 8.52E-01 | -0.63 | 7.37E-01 |
| KRT40    | -0.10 | 5.38E-01 | 1.25  | 1.06E-01 | 0.39  | 3.50E-01 |
| PTP4A1   | -0.10 | 5.38E-01 | -1.19 | 8.83E-01 | 0.71  | 2.40E-01 |
| OR52N1   | -0.10 | 5.38E-01 | 1.41  | 7.99E-02 | 0.13  | 4.49E-01 |
| ACAD9    | -0.10 | 5.38E-01 | 0.94  | 1.75E-01 | 0.33  | 3.70E-01 |
| IQCC     | -0.10 | 5.38E-01 | -0.47 | 6.83E-01 | -0.26 | 6.02E-01 |
| LZIC     | -0.10 | 5.38E-01 | -0.43 | 6.66E-01 | 0.27  | 3.92E-01 |
| OR2S2    | -0.10 | 5.38E-01 | -1.25 | 8.95E-01 | 0.63  | 2.66E-01 |
| DRAM1    | -0.10 | 5.38E-01 | 0.38  | 3.52E-01 | -1.33 | 9.08E-01 |
| GFOD2    | -0.10 | 5.38E-01 | -0.27 | 6.08E-01 | 1.80  | 3.63E-02 |
| IL36A    | -0.10 | 5.38E-01 | 1.65  | 4.97E-02 | 0.02  | 4.94E-01 |
| NUDT2    | -0.10 | 5.39E-01 | -1.24 | 8.92E-01 | 0.83  | 2.03E-01 |
| KIAA1147 | -0.10 | 5.39E-01 | -0.06 | 5.24E-01 | -0.88 | 8.10E-01 |
| PSMA1    | -0.10 | 5.39E-01 | 0.01  | 4.95E-01 | -0.12 | 5.46E-01 |
| ZNF222   | -0.10 | 5.39E-01 | 0.33  | 3.72E-01 | -1.89 | 9.70E-01 |
| CAPN2    | -0.10 | 5.39E-01 | 0.58  | 2.82E-01 | -1.02 | 8.45E-01 |
| DHX34    | -0.10 | 5.39E-01 | -0.42 | 6.62E-01 | -0.35 | 6.39E-01 |

|              |       |          |       |          |       |          |
|--------------|-------|----------|-------|----------|-------|----------|
| RP11-410N8.4 | -0.10 | 5.39E-01 | 0.15  | 4.42E-01 | 1.89  | 2.92E-02 |
| CNPPD1       | -0.10 | 5.39E-01 | -0.55 | 7.09E-01 | -0.55 | 7.09E-01 |
| ATPAF1       | -0.10 | 5.39E-01 | -0.35 | 6.38E-01 | -0.14 | 5.54E-01 |
| GRASP        | -0.10 | 5.39E-01 | -0.40 | 6.57E-01 | -0.78 | 7.81E-01 |
| TMEM208      | -0.10 | 5.39E-01 | -0.71 | 7.62E-01 | -0.46 | 6.77E-01 |
| GPR110       | -0.10 | 5.39E-01 | -0.49 | 6.88E-01 | -0.20 | 5.80E-01 |
| DIMT1        | -0.10 | 5.39E-01 | 1.05  | 1.48E-01 | -0.56 | 7.11E-01 |
| SOGA2        | -0.10 | 5.39E-01 | -1.31 | 9.04E-01 | 0.47  | 3.18E-01 |
| SMARCD2      | -0.10 | 5.39E-01 | -0.53 | 7.03E-01 | -0.88 | 8.10E-01 |
| TMEM120B     | -0.10 | 5.39E-01 | -1.34 | 9.11E-01 | 0.24  | 4.04E-01 |
| TDP1         | -0.10 | 5.39E-01 | 1.40  | 8.09E-02 | -0.27 | 6.06E-01 |
| TSPAN19      | -0.10 | 5.39E-01 | -0.82 | 7.94E-01 | -0.39 | 6.53E-01 |
| DAAM1        | -0.10 | 5.39E-01 | -0.53 | 7.01E-01 | 0.00  | 4.98E-01 |
| DLX2         | -0.10 | 5.40E-01 | -1.60 | 9.45E-01 | 0.09  | 4.64E-01 |
| BST2         | -0.10 | 5.40E-01 | -0.84 | 8.01E-01 | -0.54 | 7.07E-01 |
| C12orf77     | -0.10 | 5.40E-01 | -0.65 | 7.43E-01 | 0.41  | 3.41E-01 |
| IGHMBP2      | -0.10 | 5.40E-01 | -0.01 | 5.05E-01 | -1.07 | 8.57E-01 |
| MTMR9        | -0.10 | 5.40E-01 | 0.73  | 2.32E-01 | -0.47 | 6.81E-01 |
| PLSCR1       | -0.10 | 5.40E-01 | -0.70 | 7.58E-01 | -0.48 | 6.86E-01 |
| GLP2R        | -0.10 | 5.40E-01 | -0.51 | 6.96E-01 | -0.01 | 5.06E-01 |
| MYH14        | -0.10 | 5.40E-01 | 0.86  | 1.96E-01 | 0.04  | 4.85E-01 |
| CHD3         | -0.10 | 5.40E-01 | 1.05  | 1.47E-01 | 0.00  | 4.98E-01 |
| ZNF878       | -0.10 | 5.40E-01 | -0.12 | 5.48E-01 | -0.56 | 7.12E-01 |
| C1orf146     | -0.10 | 5.40E-01 | 0.03  | 4.88E-01 | -0.68 | 7.52E-01 |
| PPP3CC       | -0.10 | 5.40E-01 | 0.97  | 1.65E-01 | 0.07  | 4.70E-01 |
| ENOPH1       | -0.10 | 5.40E-01 | -0.27 | 6.05E-01 | -0.97 | 8.33E-01 |
| TM9SF3       | -0.10 | 5.40E-01 | -1.04 | 8.50E-01 | -0.22 | 5.86E-01 |
| DNAI1        | -0.10 | 5.41E-01 | 0.02  | 4.93E-01 | 0.04  | 4.83E-01 |
| TCN1         | -0.10 | 5.41E-01 | -0.24 | 5.96E-01 | -0.27 | 6.05E-01 |
| TNFAIP6      | -0.10 | 5.41E-01 | 0.50  | 3.09E-01 | -1.12 | 8.68E-01 |
| NBR1         | -0.10 | 5.41E-01 | -0.79 | 7.86E-01 | 0.58  | 2.82E-01 |

|          |       |          |       |          |       |          |
|----------|-------|----------|-------|----------|-------|----------|
| PPP1R3G  | -0.10 | 5.41E-01 | -0.12 | 5.48E-01 | -0.38 | 6.46E-01 |
| PCDHGA4  | -0.10 | 5.41E-01 | 0.65  | 2.58E-01 | 0.49  | 3.14E-01 |
| NKAIN2   | -0.10 | 5.41E-01 | -0.72 | 7.65E-01 | -1.41 | 9.21E-01 |
| KIAA0196 | -0.10 | 5.41E-01 | -0.38 | 6.47E-01 | -1.10 | 8.64E-01 |
| ZNF98    | -0.10 | 5.41E-01 | 0.08  | 4.69E-01 | 0.90  | 1.85E-01 |
| C9orf117 | -0.10 | 5.41E-01 | 0.97  | 1.65E-01 | -0.36 | 6.39E-01 |
| CPEB4    | -0.10 | 5.41E-01 | -0.58 | 7.19E-01 | 0.41  | 3.41E-01 |
| PRPF18   | -0.10 | 5.41E-01 | -1.53 | 9.37E-01 | 2.16  | 1.54E-02 |
| OR7A10   | -0.10 | 5.42E-01 | 0.61  | 2.71E-01 | 1.21  | 1.13E-01 |
| RABEP1   | -0.10 | 5.42E-01 | 1.43  | 7.64E-02 | 0.19  | 4.25E-01 |
| SLC16A4  | -0.10 | 5.42E-01 | 0.53  | 2.99E-01 | -1.85 | 9.68E-01 |
| OR1L1    | -0.10 | 5.42E-01 | 0.64  | 2.62E-01 | -0.63 | 7.35E-01 |
| XDH      | -0.11 | 5.42E-01 | 0.42  | 3.37E-01 | -0.37 | 6.46E-01 |
| MCCC1    | -0.11 | 5.42E-01 | -0.44 | 6.69E-01 | 0.58  | 2.81E-01 |
| SGPP1    | -0.11 | 5.42E-01 | -0.84 | 8.00E-01 | -0.03 | 5.13E-01 |
| ARMC4    | -0.11 | 5.42E-01 | 0.69  | 2.47E-01 | -0.61 | 7.30E-01 |
| LTN1     | -0.11 | 5.42E-01 | 0.05  | 4.81E-01 | -1.40 | 9.20E-01 |
| ZNF227   | -0.11 | 5.42E-01 | -0.68 | 7.51E-01 | -0.67 | 7.47E-01 |
| PCDHGB4  | -0.11 | 5.42E-01 | 0.94  | 1.72E-01 | -0.07 | 5.27E-01 |
| CMTM1    | -0.11 | 5.42E-01 | -0.93 | 8.25E-01 | 0.59  | 2.77E-01 |
| ACSM4    | -0.11 | 5.42E-01 | -1.28 | 8.99E-01 | 0.54  | 2.95E-01 |
| EPS8     | -0.11 | 5.43E-01 | -0.93 | 8.23E-01 | 1.61  | 5.40E-02 |
| CDYL     | -0.11 | 5.43E-01 | -1.23 | 8.91E-01 | 0.53  | 2.98E-01 |
| PCDHGA8  | -0.11 | 5.43E-01 | 0.99  | 1.62E-01 | -0.17 | 5.69E-01 |
| CELF4    | -0.11 | 5.43E-01 | -0.17 | 5.66E-01 | 1.31  | 9.48E-02 |
| FAM103A1 | -0.11 | 5.43E-01 | -0.57 | 7.14E-01 | 1.15  | 1.24E-01 |
| ZNF385D  | -0.11 | 5.43E-01 | 1.50  | 6.71E-02 | -0.62 | 7.31E-01 |
| PCDHGA9  | -0.11 | 5.43E-01 | 1.04  | 1.50E-01 | -0.40 | 6.55E-01 |
| CKAP2L   | -0.11 | 5.43E-01 | -0.33 | 6.30E-01 | -0.69 | 7.56E-01 |
| TIMM9    | -0.11 | 5.43E-01 | -0.20 | 5.81E-01 | -0.51 | 6.94E-01 |
| DOCK7    | -0.11 | 5.43E-01 | 1.16  | 1.22E-01 | -0.52 | 7.00E-01 |

|              |       |          |       |          |       |          |
|--------------|-------|----------|-------|----------|-------|----------|
| CLCN1        | -0.11 | 5.43E-01 | 0.29  | 3.85E-01 | -0.73 | 7.68E-01 |
| C1QA         | -0.11 | 5.43E-01 | 1.84  | 3.29E-02 | 0.44  | 3.29E-01 |
| RNF217       | -0.11 | 5.43E-01 | 0.28  | 3.88E-01 | -0.45 | 6.72E-01 |
| GINM1        | -0.11 | 5.43E-01 | -0.97 | 8.33E-01 | -0.06 | 5.25E-01 |
| RAB10        | -0.11 | 5.43E-01 | 0.65  | 2.58E-01 | -0.32 | 6.26E-01 |
| PCDHGB7      | -0.11 | 5.43E-01 | 1.12  | 1.32E-01 | -0.52 | 6.98E-01 |
| SYNPO2       | -0.11 | 5.43E-01 | 0.42  | 3.38E-01 | 0.44  | 3.28E-01 |
| TCFL5        | -0.11 | 5.43E-01 | -0.43 | 6.67E-01 | 0.00  | 5.01E-01 |
| TUBA4A       | -0.11 | 5.43E-01 | -1.02 | 8.47E-01 | -0.17 | 5.68E-01 |
| DPM1         | -0.11 | 5.43E-01 | 0.43  | 3.33E-01 | -0.35 | 6.37E-01 |
| SDR42E1      | -0.11 | 5.43E-01 | -0.26 | 6.02E-01 | 1.45  | 7.30E-02 |
| POLR3A       | -0.11 | 5.43E-01 | -0.10 | 5.39E-01 | -0.68 | 7.52E-01 |
| WARS         | -0.11 | 5.43E-01 | 0.36  | 3.61E-01 | -2.27 | 9.88E-01 |
| FAM189A1     | -0.11 | 5.44E-01 | 0.16  | 4.37E-01 | 0.48  | 3.17E-01 |
| ABCB10       | -0.11 | 5.44E-01 | -1.11 | 8.66E-01 | 0.34  | 3.67E-01 |
| MICALL2      | -0.11 | 5.44E-01 | 0.62  | 2.69E-01 | 1.54  | 6.17E-02 |
| APAF1        | -0.11 | 5.44E-01 | 0.84  | 2.01E-01 | -1.65 | 9.50E-01 |
| PDPN         | -0.11 | 5.44E-01 | 0.11  | 4.55E-01 | -1.61 | 9.47E-01 |
| MEGF6        | -0.11 | 5.44E-01 | -0.67 | 7.48E-01 | -0.13 | 5.53E-01 |
| CYLD         | -0.11 | 5.44E-01 | 1.42  | 7.83E-02 | -0.93 | 8.24E-01 |
| DPH6         | -0.11 | 5.44E-01 | -1.17 | 8.80E-01 | 0.41  | 3.40E-01 |
| AC027763.2   | -0.11 | 5.44E-01 | 0.65  | 2.59E-01 | -2.08 | 9.81E-01 |
| IL6          | -0.11 | 5.44E-01 | -1.68 | 9.54E-01 | 1.18  | 1.20E-01 |
| MYOZ2        | -0.11 | 5.44E-01 | -0.43 | 6.67E-01 | -0.60 | 7.26E-01 |
| HPS6         | -0.11 | 5.44E-01 | -0.04 | 5.15E-01 | -1.45 | 9.26E-01 |
| APOC1        | -0.11 | 5.44E-01 | -0.10 | 5.39E-01 | 0.10  | 4.59E-01 |
| NT5C1B-RDH14 | -0.11 | 5.44E-01 | 0.26  | 3.96E-01 | -0.60 | 7.27E-01 |
| NT5C1B       | -0.11 | 5.44E-01 | 0.26  | 3.96E-01 | -0.60 | 7.27E-01 |
| REXO1        | -0.11 | 5.44E-01 | 0.96  | 1.69E-01 | -0.55 | 7.10E-01 |
| TOMM20       | -0.11 | 5.44E-01 | -0.14 | 5.57E-01 | -0.41 | 6.57E-01 |
| DAP          | -0.11 | 5.44E-01 | -0.78 | 7.82E-01 | -0.15 | 5.61E-01 |

|          |       |          |       |          |       |          |
|----------|-------|----------|-------|----------|-------|----------|
| STAT3    | -0.11 | 5.45E-01 | 0.71  | 2.39E-01 | -1.07 | 8.57E-01 |
| C6orf226 | -0.11 | 5.45E-01 | 0.03  | 4.87E-01 | -0.07 | 5.27E-01 |
| TAT      | -0.11 | 5.45E-01 | -0.22 | 5.88E-01 | 0.96  | 1.69E-01 |
| C20orf62 | -0.11 | 5.45E-01 | -0.71 | 7.61E-01 | 1.26  | 1.04E-01 |
| EBLN1    | -0.11 | 5.45E-01 | -0.96 | 8.30E-01 | 0.07  | 4.73E-01 |
| PON3     | -0.11 | 5.45E-01 | -0.51 | 6.95E-01 | -0.25 | 5.98E-01 |
| RGS20    | -0.11 | 5.45E-01 | 0.25  | 4.00E-01 | -1.23 | 8.92E-01 |
| SERPINA9 | -0.11 | 5.45E-01 | 0.76  | 2.22E-01 | -2.27 | 9.88E-01 |
| GOLGA5   | -0.11 | 5.45E-01 | 0.42  | 3.37E-01 | -1.48 | 9.30E-01 |
| FAM114A2 | -0.11 | 5.45E-01 | 0.94  | 1.74E-01 | -0.59 | 7.22E-01 |
| SLC25A23 | -0.11 | 5.45E-01 | -1.95 | 9.74E-01 | 0.49  | 3.13E-01 |
| IKBIP    | -0.11 | 5.45E-01 | 1.24  | 1.07E-01 | -1.31 | 9.05E-01 |
| CCDC50   | -0.11 | 5.45E-01 | -1.50 | 9.33E-01 | 0.43  | 3.35E-01 |
| AUNIP    | -0.11 | 5.45E-01 | -0.72 | 7.65E-01 | -0.17 | 5.68E-01 |
| USP25    | -0.11 | 5.45E-01 | 0.72  | 2.37E-01 | -0.95 | 8.29E-01 |
| PSMD5    | -0.11 | 5.45E-01 | -0.32 | 6.25E-01 | 0.11  | 4.55E-01 |
| LRRCC1   | -0.11 | 5.45E-01 | -0.47 | 6.82E-01 | -0.64 | 7.37E-01 |
| ZNF133   | -0.11 | 5.45E-01 | -0.31 | 6.23E-01 | -1.06 | 8.56E-01 |
| PCDHGA10 | -0.11 | 5.45E-01 | 1.09  | 1.37E-01 | -0.53 | 7.03E-01 |
| FAM60A   | -0.11 | 5.45E-01 | -1.22 | 8.88E-01 | 0.17  | 4.34E-01 |
| MAML1    | -0.11 | 5.45E-01 | -0.07 | 5.26E-01 | -1.53 | 9.37E-01 |
| CFLAR    | -0.11 | 5.46E-01 | 0.55  | 2.91E-01 | -0.67 | 7.48E-01 |
| GJB3     | -0.11 | 5.46E-01 | 0.70  | 2.43E-01 | -1.10 | 8.65E-01 |
| GSTM5    | -0.12 | 5.46E-01 | 0.17  | 4.34E-01 | -0.59 | 7.23E-01 |
| HNRNPF   | -0.12 | 5.46E-01 | 0.56  | 2.89E-01 | 1.82  | 3.41E-02 |
| LDB3     | -0.12 | 5.46E-01 | 0.46  | 3.23E-01 | -1.51 | 9.34E-01 |
| SLC25A2  | -0.12 | 5.46E-01 | -0.28 | 6.11E-01 | -0.65 | 7.42E-01 |
| TAF5     | -0.12 | 5.46E-01 | -0.60 | 7.27E-01 | -0.10 | 5.41E-01 |
| MACF1    | -0.12 | 5.46E-01 | 0.65  | 2.57E-01 | -1.54 | 9.38E-01 |
| AFP      | -0.12 | 5.46E-01 | 0.07  | 4.70E-01 | -0.60 | 7.25E-01 |
| MARK4    | -0.12 | 5.46E-01 | -1.53 | 9.37E-01 | 1.30  | 9.71E-02 |

|          |       |          |       |          |       |          |
|----------|-------|----------|-------|----------|-------|----------|
| PCDHGA11 | -0.12 | 5.47E-01 | 1.14  | 1.28E-01 | -0.53 | 7.02E-01 |
| GOLGB1   | -0.12 | 5.47E-01 | 0.70  | 2.42E-01 | -1.41 | 9.21E-01 |
| ZBTB8A   | -0.12 | 5.47E-01 | -0.06 | 5.24E-01 | -1.07 | 8.57E-01 |
| MYL9     | -0.12 | 5.47E-01 | 0.57  | 2.84E-01 | -0.22 | 5.89E-01 |
| OR51F1   | -0.12 | 5.47E-01 | 0.41  | 3.41E-01 | -1.12 | 8.68E-01 |
| RBBP9    | -0.12 | 5.47E-01 | -0.37 | 6.43E-01 | 1.28  | 9.95E-02 |
| DDX21    | -0.12 | 5.47E-01 | -1.30 | 9.04E-01 | 0.20  | 4.19E-01 |
| C4orf3   | -0.12 | 5.47E-01 | -0.99 | 8.38E-01 | -0.61 | 7.30E-01 |
| UBXN10   | -0.12 | 5.47E-01 | 0.86  | 1.95E-01 | -0.27 | 6.08E-01 |
| PHIP     | -0.12 | 5.47E-01 | 0.50  | 3.07E-01 | -1.12 | 8.70E-01 |
| HMGCS2   | -0.12 | 5.47E-01 | -0.35 | 6.38E-01 | -1.24 | 8.93E-01 |
| LMF2     | -0.12 | 5.47E-01 | 0.23  | 4.10E-01 | -0.35 | 6.37E-01 |
| KMT2D    | -0.12 | 5.47E-01 | -0.50 | 6.91E-01 | -0.20 | 5.79E-01 |
| ARL9     | -0.12 | 5.47E-01 | 0.25  | 4.00E-01 | 0.45  | 3.26E-01 |
| WIPF1    | -0.12 | 5.47E-01 | -0.51 | 6.94E-01 | 0.63  | 2.66E-01 |
| ESRRA    | -0.12 | 5.47E-01 | -0.30 | 6.19E-01 | 1.00  | 1.59E-01 |
| SHPK     | -0.12 | 5.47E-01 | 1.45  | 7.34E-02 | -0.22 | 5.86E-01 |
| MRPL42   | -0.12 | 5.47E-01 | -0.13 | 5.51E-01 | 0.93  | 1.75E-01 |
| SLC39A3  | -0.12 | 5.47E-01 | -0.09 | 5.34E-01 | 0.08  | 4.68E-01 |
| RBM14    | -0.12 | 5.47E-01 | 0.14  | 4.45E-01 | -2.07 | 9.81E-01 |
| RDH10    | -0.12 | 5.47E-01 | -0.68 | 7.51E-01 | 0.14  | 4.43E-01 |
| SLC39A6  | -0.12 | 5.47E-01 | 0.21  | 4.15E-01 | 1.79  | 3.67E-02 |
| MASP2    | -0.12 | 5.47E-01 | 0.53  | 2.97E-01 | -0.06 | 5.25E-01 |
| ESRP2    | -0.12 | 5.47E-01 | -0.40 | 6.55E-01 | 1.61  | 5.41E-02 |
| OSBPL10  | -0.12 | 5.48E-01 | -0.66 | 7.44E-01 | 1.16  | 1.24E-01 |
| BAK1     | -0.12 | 5.48E-01 | 0.36  | 3.58E-01 | -0.05 | 5.19E-01 |
| COL6A1   | -0.12 | 5.48E-01 | -0.30 | 6.16E-01 | 0.28  | 3.90E-01 |
| KIRREL   | -0.12 | 5.48E-01 | 0.33  | 3.72E-01 | -1.16 | 8.76E-01 |
| FAM221B  | -0.12 | 5.48E-01 | 0.20  | 4.20E-01 | -0.35 | 6.37E-01 |
| RCC2     | -0.12 | 5.48E-01 | 0.15  | 4.39E-01 | -0.76 | 7.76E-01 |
| BTC      | -0.12 | 5.48E-01 | 0.85  | 1.98E-01 | -0.28 | 6.10E-01 |



|               |       |          |       |          |       |          |
|---------------|-------|----------|-------|----------|-------|----------|
| ZNF813        | -0.12 | 5.48E-01 | -1.01 | 8.44E-01 | -0.53 | 7.03E-01 |
| NDUFC2-KCTD14 | -0.12 | 5.48E-01 | -0.93 | 8.25E-01 | -0.40 | 6.54E-01 |
| SLC30A8       | -0.12 | 5.48E-01 | -0.37 | 6.43E-01 | 0.91  | 1.81E-01 |
| KLF17         | -0.12 | 5.48E-01 | -2.10 | 9.82E-01 | 0.36  | 3.60E-01 |
| ORMDL1        | -0.12 | 5.48E-01 | 0.18  | 4.29E-01 | 0.65  | 2.59E-01 |
| TRIM52        | -0.12 | 5.48E-01 | 0.62  | 2.67E-01 | 0.22  | 4.11E-01 |
| ZNF124        | -0.12 | 5.48E-01 | 0.16  | 4.35E-01 | -1.37 | 9.15E-01 |
| MFAP3L        | -0.12 | 5.48E-01 | 0.38  | 3.53E-01 | -1.58 | 9.43E-01 |
| AQP8          | -0.12 | 5.48E-01 | 1.45  | 7.42E-02 | 0.08  | 4.68E-01 |
| SAMD11        | -0.12 | 5.48E-01 | 1.50  | 6.62E-02 | -0.50 | 6.90E-01 |
| VPS4A         | -0.12 | 5.48E-01 | -0.45 | 6.74E-01 | 2.04  | 2.09E-02 |
| RP11-796G6.2  | -0.12 | 5.48E-01 | -0.65 | 7.42E-01 | 0.86  | 1.95E-01 |
| UQCC2         | -0.12 | 5.48E-01 | -0.02 | 5.10E-01 | -0.80 | 7.90E-01 |
| DBR1          | -0.12 | 5.48E-01 | -0.98 | 8.37E-01 | 0.51  | 3.05E-01 |
| PRKAR1A       | -0.12 | 5.49E-01 | 0.89  | 1.86E-01 | -0.82 | 7.93E-01 |
| TTC29         | -0.12 | 5.49E-01 | 0.13  | 4.48E-01 | -1.32 | 9.07E-01 |
| PRDM8         | -0.12 | 5.49E-01 | 0.12  | 4.51E-01 | 0.53  | 2.98E-01 |
| ZNF791        | -0.12 | 5.49E-01 | 0.43  | 3.34E-01 | -0.65 | 7.42E-01 |
| EIF2S1        | -0.12 | 5.49E-01 | 0.49  | 3.13E-01 | -0.02 | 5.07E-01 |
| PCDHGA1       | -0.12 | 5.49E-01 | 0.47  | 3.18E-01 | 0.58  | 2.82E-01 |
| HSD17B1       | -0.12 | 5.49E-01 | -1.03 | 8.48E-01 | -0.59 | 7.24E-01 |
| PITPNA        | -0.12 | 5.49E-01 | 1.47  | 7.11E-02 | -0.96 | 8.32E-01 |
| AXDND1        | -0.12 | 5.49E-01 | 0.03  | 4.88E-01 | 1.01  | 1.57E-01 |
| SLC13A3       | -0.12 | 5.49E-01 | -0.47 | 6.80E-01 | -0.71 | 7.62E-01 |
| UROC1         | -0.12 | 5.49E-01 | 0.45  | 3.27E-01 | 0.95  | 1.71E-01 |
| C6orf99       | -0.12 | 5.49E-01 | -0.28 | 6.10E-01 | 0.24  | 4.04E-01 |
| RB1           | -0.12 | 5.49E-01 | -0.72 | 7.64E-01 | 0.67  | 2.50E-01 |
| ANKRA2        | -0.12 | 5.49E-01 | -0.26 | 6.02E-01 | -0.79 | 7.84E-01 |
| IMPDH1        | -0.12 | 5.50E-01 | -0.21 | 5.82E-01 | -0.26 | 6.01E-01 |
| SLC39A5       | -0.12 | 5.50E-01 | 0.72  | 2.37E-01 | 1.50  | 6.74E-02 |
| CNTNAP5       | -0.13 | 5.50E-01 | -0.22 | 5.86E-01 | -1.22 | 8.89E-01 |

|          |       |          |       |          |       |          |
|----------|-------|----------|-------|----------|-------|----------|
| TRMT61B  | -0.13 | 5.50E-01 | 1.61  | 5.35E-02 | 0.02  | 4.90E-01 |
| XPC      | -0.13 | 5.50E-01 | -0.72 | 7.64E-01 | -0.36 | 6.41E-01 |
| LGSN     | -0.13 | 5.50E-01 | -1.31 | 9.05E-01 | 0.99  | 1.60E-01 |
| SULT2A1  | -0.13 | 5.50E-01 | 0.28  | 3.90E-01 | -0.05 | 5.20E-01 |
| ZNF695   | -0.13 | 5.50E-01 | -0.63 | 7.37E-01 | -0.39 | 6.52E-01 |
| PRSS36   | -0.13 | 5.51E-01 | 0.80  | 2.11E-01 | 0.18  | 4.29E-01 |
| CCDC96   | -0.13 | 5.51E-01 | -1.06 | 8.57E-01 | -0.13 | 5.50E-01 |
| TMCO4    | -0.13 | 5.51E-01 | -0.79 | 7.84E-01 | -0.43 | 6.68E-01 |
| DDIT4    | -0.13 | 5.51E-01 | 0.96  | 1.69E-01 | -1.04 | 8.50E-01 |
| DHODH    | -0.13 | 5.51E-01 | 0.19  | 4.24E-01 | 0.32  | 3.73E-01 |
| CERS6    | -0.13 | 5.51E-01 | 0.73  | 2.33E-01 | 1.40  | 8.02E-02 |
| CFHR4    | -0.13 | 5.51E-01 | 2.18  | 1.47E-02 | 1.38  | 8.43E-02 |
| XIRP2    | -0.13 | 5.51E-01 | -0.55 | 7.08E-01 | -0.87 | 8.08E-01 |
| C1orf74  | -0.13 | 5.51E-01 | -2.37 | 9.91E-01 | 0.52  | 3.02E-01 |
| PPP1R1C  | -0.13 | 5.51E-01 | -0.16 | 5.64E-01 | -0.35 | 6.37E-01 |
| SYNE2    | -0.13 | 5.51E-01 | 1.15  | 1.25E-01 | 1.18  | 1.20E-01 |
| OAS1     | -0.13 | 5.51E-01 | -0.74 | 7.69E-01 | 0.62  | 2.68E-01 |
| IL4      | -0.13 | 5.51E-01 | 2.26  | 1.20E-02 | 1.31  | 9.57E-02 |
| ZNF625   | -0.13 | 5.51E-01 | 0.01  | 4.96E-01 | -0.21 | 5.84E-01 |
| PCDHGB2  | -0.13 | 5.51E-01 | 0.70  | 2.42E-01 | 0.39  | 3.47E-01 |
| ANKIB1   | -0.13 | 5.51E-01 | -0.38 | 6.49E-01 | 0.20  | 4.20E-01 |
| ZNF587B  | -0.13 | 5.51E-01 | 0.04  | 4.85E-01 | -1.34 | 9.10E-01 |
| MED24    | -0.13 | 5.51E-01 | -0.58 | 7.20E-01 | -0.40 | 6.56E-01 |
| DCLK3    | -0.13 | 5.51E-01 | -0.83 | 7.96E-01 | -0.06 | 5.25E-01 |
| ZNF8     | -0.13 | 5.51E-01 | -0.69 | 7.54E-01 | -0.18 | 5.73E-01 |
| ZNF8     | -0.13 | 5.51E-01 | -0.69 | 7.54E-01 | -0.18 | 5.73E-01 |
| GYS1     | -0.13 | 5.51E-01 | -1.11 | 8.68E-01 | 0.22  | 4.13E-01 |
| KRTAP4-8 | -0.13 | 5.52E-01 | 0.52  | 3.01E-01 | -0.65 | 7.44E-01 |
| CST9L    | -0.13 | 5.52E-01 | 0.85  | 1.97E-01 | -0.26 | 6.01E-01 |
| TMEM206  | -0.13 | 5.52E-01 | 0.76  | 2.24E-01 | 1.90  | 2.87E-02 |
| GNG12    | -0.13 | 5.52E-01 | -1.15 | 8.75E-01 | 0.73  | 2.31E-01 |

|          |       |          |       |          |       |          |
|----------|-------|----------|-------|----------|-------|----------|
| C17orf75 | -0.13 | 5.52E-01 | 1.42  | 7.80E-02 | -0.43 | 6.67E-01 |
| RNF111   | -0.13 | 5.52E-01 | 0.44  | 3.30E-01 | -1.58 | 9.42E-01 |
| ZNF407   | -0.13 | 5.52E-01 | 0.67  | 2.53E-01 | -1.01 | 8.43E-01 |
| TYK2     | -0.13 | 5.52E-01 | -0.60 | 7.27E-01 | 0.66  | 2.55E-01 |
| CLEC17A  | -0.13 | 5.52E-01 | -0.47 | 6.82E-01 | 1.79  | 3.66E-02 |
| 43346    | -0.13 | 5.52E-01 | 0.05  | 4.82E-01 | -1.29 | 9.01E-01 |
| PCDHGC5  | -0.13 | 5.52E-01 | 1.05  | 1.46E-01 | -1.34 | 9.10E-01 |
| SALL4    | -0.13 | 5.52E-01 | 0.81  | 2.08E-01 | -1.07 | 8.58E-01 |
| ZNF175   | -0.13 | 5.52E-01 | -0.82 | 7.94E-01 | -0.72 | 7.65E-01 |
| PITHD1   | -0.13 | 5.52E-01 | -0.85 | 8.03E-01 | 0.65  | 2.59E-01 |
| SPINK2   | -0.13 | 5.52E-01 | -0.25 | 6.00E-01 | -0.44 | 6.70E-01 |
| CACNA1I  | -0.13 | 5.52E-01 | -0.71 | 7.61E-01 | 0.27  | 3.94E-01 |
| SAMD13   | -0.13 | 5.52E-01 | -1.33 | 9.08E-01 | 0.31  | 3.77E-01 |
| ZNF507   | -0.13 | 5.52E-01 | 1.54  | 6.15E-02 | -0.40 | 6.57E-01 |
| PIGR     | -0.13 | 5.52E-01 | 0.95  | 1.70E-01 | 1.27  | 1.02E-01 |
| THADA    | -0.13 | 5.53E-01 | -0.68 | 7.52E-01 | -0.25 | 5.99E-01 |
| SPHK2    | -0.13 | 5.53E-01 | -1.19 | 8.84E-01 | -0.18 | 5.70E-01 |
| TSHZ2    | -0.13 | 5.53E-01 | -0.48 | 6.83E-01 | 0.74  | 2.31E-01 |
| CS       | -0.13 | 5.53E-01 | 0.19  | 4.23E-01 | 1.64  | 5.07E-02 |
| SORD     | -0.13 | 5.53E-01 | 1.51  | 6.59E-02 | -0.47 | 6.80E-01 |
| ZDHHC18  | -0.13 | 5.53E-01 | -0.63 | 7.36E-01 | 1.94  | 2.64E-02 |
| PIGC     | -0.13 | 5.53E-01 | -0.90 | 8.17E-01 | 1.00  | 1.58E-01 |
| ADAM8    | -0.13 | 5.53E-01 | -0.46 | 6.76E-01 | 0.53  | 2.99E-01 |
| GPD1     | -0.13 | 5.53E-01 | -1.97 | 9.76E-01 | 0.46  | 3.23E-01 |
| IGDCC4   | -0.13 | 5.53E-01 | 1.07  | 1.42E-01 | 1.15  | 1.25E-01 |
| PCDHGC4  | -0.13 | 5.53E-01 | 1.22  | 1.11E-01 | -1.28 | 8.99E-01 |
| FAM126B  | -0.13 | 5.53E-01 | -0.32 | 6.25E-01 | -1.11 | 8.67E-01 |
| MAT2B    | -0.13 | 5.53E-01 | -0.56 | 7.11E-01 | -1.01 | 8.43E-01 |
| RANBP3L  | -0.13 | 5.53E-01 | -1.16 | 8.77E-01 | -0.27 | 6.08E-01 |
| KCNJ8    | -0.13 | 5.54E-01 | -0.11 | 5.44E-01 | 0.22  | 4.14E-01 |
| MAPK4    | -0.13 | 5.54E-01 | -0.17 | 5.69E-01 | -0.23 | 5.91E-01 |

|            |       |          |       |          |       |          |
|------------|-------|----------|-------|----------|-------|----------|
| BCL11A     | -0.14 | 5.54E-01 | -0.81 | 7.91E-01 | 2.43  | 7.48E-03 |
| ZNF517     | -0.14 | 5.54E-01 | 0.14  | 4.43E-01 | -0.94 | 8.25E-01 |
| MYLK3      | -0.14 | 5.54E-01 | 0.20  | 4.21E-01 | -0.28 | 6.11E-01 |
| FN3K       | -0.14 | 5.54E-01 | -0.26 | 6.03E-01 | -0.60 | 7.25E-01 |
| RAB27A     | -0.14 | 5.54E-01 | 0.07  | 4.71E-01 | -0.72 | 7.65E-01 |
| AL360004.1 | -0.14 | 5.54E-01 | -0.92 | 8.21E-01 | 0.33  | 3.72E-01 |
| GPX1       | -0.14 | 5.54E-01 | -0.37 | 6.43E-01 | 1.04  | 1.50E-01 |
| BARX1      | -0.14 | 5.54E-01 | 0.60  | 2.73E-01 | -0.55 | 7.10E-01 |
| RTEL1      | -0.14 | 5.54E-01 | 0.75  | 2.26E-01 | 0.26  | 3.96E-01 |
| NLRP3      | -0.14 | 5.54E-01 | -0.07 | 5.29E-01 | -1.47 | 9.29E-01 |
| SFTA3      | -0.14 | 5.55E-01 | 0.05  | 4.80E-01 | 0.43  | 3.32E-01 |
| AL450307.1 | -0.14 | 5.55E-01 | -0.70 | 7.58E-01 | 0.22  | 4.14E-01 |
| GYG1       | -0.14 | 5.55E-01 | -1.28 | 9.00E-01 | 0.35  | 3.64E-01 |
| KIAA1614   | -0.14 | 5.55E-01 | 0.06  | 4.76E-01 | 0.11  | 4.57E-01 |
| DFNB59     | -0.14 | 5.55E-01 | 0.13  | 4.49E-01 | 0.15  | 4.40E-01 |
| RNF149     | -0.14 | 5.55E-01 | -0.92 | 8.21E-01 | 0.54  | 2.95E-01 |
| FOXF1      | -0.14 | 5.55E-01 | -0.42 | 6.63E-01 | -0.14 | 5.54E-01 |
| LECT1      | -0.14 | 5.55E-01 | 0.21  | 4.18E-01 | -0.08 | 5.32E-01 |
| SSR1       | -0.14 | 5.55E-01 | -0.65 | 7.43E-01 | -0.48 | 6.83E-01 |
| ZUFSP      | -0.14 | 5.55E-01 | 0.16  | 4.36E-01 | -0.63 | 7.35E-01 |
| OR2AG2     | -0.14 | 5.55E-01 | -0.46 | 6.77E-01 | -0.98 | 8.36E-01 |
| LTC4S      | -0.14 | 5.55E-01 | -0.43 | 6.66E-01 | -1.06 | 8.54E-01 |
| TCF24      | -0.14 | 5.55E-01 | -0.23 | 5.89E-01 | -0.44 | 6.69E-01 |
| AVL9       | -0.14 | 5.55E-01 | -0.70 | 7.59E-01 | -0.70 | 7.58E-01 |
| OR10K2     | -0.14 | 5.55E-01 | 1.23  | 1.09E-01 | 0.44  | 3.30E-01 |
| VIPR2      | -0.14 | 5.55E-01 | -0.47 | 6.80E-01 | -1.26 | 8.96E-01 |
| ESRP1      | -0.14 | 5.55E-01 | -1.32 | 9.06E-01 | -0.11 | 5.42E-01 |
| HTR3C      | -0.14 | 5.55E-01 | -0.37 | 6.43E-01 | -0.55 | 7.07E-01 |
| MAP3K7CL   | -0.14 | 5.55E-01 | -0.17 | 5.69E-01 | -1.54 | 9.38E-01 |
| HMCES      | -0.14 | 5.55E-01 | -0.08 | 5.34E-01 | 1.25  | 1.05E-01 |
| TMEM80     | -0.14 | 5.55E-01 | -0.08 | 5.34E-01 | -0.48 | 6.84E-01 |

|          |       |          |       |          |       |          |
|----------|-------|----------|-------|----------|-------|----------|
| KDM4D    | -0.14 | 5.55E-01 | 0.90  | 1.84E-01 | 1.11  | 1.34E-01 |
| NAPB     | -0.14 | 5.55E-01 | 0.14  | 4.44E-01 | -1.72 | 9.57E-01 |
| PARD6B   | -0.14 | 5.56E-01 | -0.04 | 5.16E-01 | 0.44  | 3.28E-01 |
| TP53I13  | -0.14 | 5.56E-01 | -0.78 | 7.83E-01 | 1.40  | 8.12E-02 |
| DEFB128  | -0.14 | 5.56E-01 | -0.60 | 7.26E-01 | -0.38 | 6.49E-01 |
| CAPZB    | -0.14 | 5.56E-01 | 1.04  | 1.48E-01 | 1.94  | 2.62E-02 |
| KCNC3    | -0.14 | 5.56E-01 | -0.45 | 6.74E-01 | -0.28 | 6.12E-01 |
| NUTM2G   | -0.14 | 5.56E-01 | -0.53 | 7.02E-01 | -0.48 | 6.83E-01 |
| TMEM8B   | -0.14 | 5.56E-01 | 0.01  | 4.96E-01 | -0.46 | 6.78E-01 |
| C16orf54 | -0.14 | 5.56E-01 | 1.06  | 1.45E-01 | 0.16  | 4.36E-01 |
| DOCK5    | -0.14 | 5.56E-01 | 0.18  | 4.30E-01 | 0.90  | 1.84E-01 |
| ASH2L    | -0.14 | 5.56E-01 | -1.12 | 8.69E-01 | -0.15 | 5.60E-01 |
| TVP23B   | -0.14 | 5.56E-01 | -0.82 | 7.95E-01 | -0.36 | 6.42E-01 |
| GLYATL3  | -0.14 | 5.56E-01 | -0.18 | 5.73E-01 | -0.35 | 6.38E-01 |
| COMT     | -0.14 | 5.56E-01 | -0.92 | 8.22E-01 | -0.35 | 6.35E-01 |
| CLPSL2   | -0.14 | 5.56E-01 | 1.33  | 9.13E-02 | -0.69 | 7.55E-01 |
| MAPK1    | -0.14 | 5.56E-01 | -0.21 | 5.83E-01 | 1.46  | 7.25E-02 |
| FFAR4    | -0.14 | 5.57E-01 | -0.99 | 8.40E-01 | 1.29  | 9.84E-02 |
| PCDHGA5  | -0.14 | 5.57E-01 | 0.72  | 2.37E-01 | 0.34  | 3.69E-01 |
| ZC2HC1C  | -0.14 | 5.57E-01 | 0.55  | 2.92E-01 | -0.87 | 8.08E-01 |
| CX3CR1   | -0.14 | 5.57E-01 | 0.53  | 2.98E-01 | -2.22 | 9.87E-01 |
| PCDHB14  | -0.14 | 5.57E-01 | -0.63 | 7.34E-01 | -0.65 | 7.43E-01 |
| IFNL2    | -0.14 | 5.57E-01 | -0.51 | 6.94E-01 | -0.12 | 5.50E-01 |
| RHOBTB3  | -0.14 | 5.57E-01 | -1.02 | 8.46E-01 | -0.18 | 5.70E-01 |
| KLF15    | -0.14 | 5.57E-01 | 0.68  | 2.49E-01 | -0.25 | 5.98E-01 |
| RBM20    | -0.14 | 5.57E-01 | -0.85 | 8.04E-01 | -0.48 | 6.86E-01 |
| CASP14   | -0.14 | 5.57E-01 | -0.68 | 7.51E-01 | -0.11 | 5.45E-01 |
| STRADA   | -0.14 | 5.57E-01 | -0.64 | 7.40E-01 | -0.90 | 8.17E-01 |
| HINT1    | -0.14 | 5.57E-01 | -0.02 | 5.09E-01 | -1.16 | 8.77E-01 |
| KIF14    | -0.14 | 5.57E-01 | -0.19 | 5.77E-01 | -0.48 | 6.83E-01 |
| CAMKMT   | -0.14 | 5.57E-01 | -0.80 | 7.88E-01 | 0.49  | 3.11E-01 |

|            |       |          |       |          |       |          |
|------------|-------|----------|-------|----------|-------|----------|
| ATG2B      | -0.14 | 5.57E-01 | -0.20 | 5.77E-01 | 0.49  | 3.13E-01 |
| PSMC5      | -0.14 | 5.57E-01 | -0.70 | 7.57E-01 | -0.18 | 5.70E-01 |
| HTR6       | -0.14 | 5.57E-01 | -0.18 | 5.71E-01 | 0.27  | 3.95E-01 |
| C11orf44   | -0.14 | 5.57E-01 | -0.52 | 7.00E-01 | -0.50 | 6.90E-01 |
| TSPYL5     | -0.14 | 5.57E-01 | -0.52 | 6.97E-01 | 1.62  | 5.31E-02 |
| ZFYVE20    | -0.14 | 5.58E-01 | -0.51 | 6.96E-01 | -0.57 | 7.16E-01 |
| WFDC12     | -0.14 | 5.58E-01 | -0.31 | 6.22E-01 | -1.06 | 8.56E-01 |
| ARPC5L     | -0.15 | 5.58E-01 | -0.37 | 6.44E-01 | 0.06  | 4.78E-01 |
| MYO5B      | -0.15 | 5.58E-01 | 0.88  | 1.89E-01 | -2.20 | 9.86E-01 |
| CDC42      | -0.15 | 5.58E-01 | -0.54 | 7.07E-01 | -0.83 | 7.95E-01 |
| OR52W1     | -0.15 | 5.58E-01 | -0.80 | 7.89E-01 | -0.12 | 5.47E-01 |
| C15orf41   | -0.15 | 5.58E-01 | 0.21  | 4.16E-01 | -1.15 | 8.76E-01 |
| NUP54      | -0.15 | 5.58E-01 | 0.25  | 4.00E-01 | -0.87 | 8.09E-01 |
| TRIM71     | -0.15 | 5.58E-01 | -0.61 | 7.30E-01 | 0.48  | 3.17E-01 |
| FCRL4      | -0.15 | 5.58E-01 | 0.56  | 2.87E-01 | -0.41 | 6.59E-01 |
| PRRG2      | -0.15 | 5.58E-01 | -0.94 | 8.27E-01 | 0.37  | 3.55E-01 |
| FAM110D    | -0.15 | 5.58E-01 | -1.09 | 8.62E-01 | -0.27 | 6.05E-01 |
| ATAD3B     | -0.15 | 5.58E-01 | -0.17 | 5.68E-01 | -1.36 | 9.13E-01 |
| MPPED2     | -0.15 | 5.58E-01 | -0.05 | 5.18E-01 | -1.10 | 8.64E-01 |
| CKLF-CMTM1 | -0.15 | 5.58E-01 | -0.90 | 8.15E-01 | 0.51  | 3.04E-01 |
| NDUFA6     | -0.15 | 5.58E-01 | 0.87  | 1.91E-01 | -1.41 | 9.20E-01 |
| C1orf234   | -0.15 | 5.58E-01 | 1.52  | 6.43E-02 | 1.31  | 9.50E-02 |
| USO1       | -0.15 | 5.58E-01 | 0.78  | 2.19E-01 | 2.02  | 2.19E-02 |
| OR52M1     | -0.15 | 5.58E-01 | -0.94 | 8.25E-01 | 1.36  | 8.68E-02 |
| PHF10      | -0.15 | 5.58E-01 | -0.59 | 7.22E-01 | -0.03 | 5.12E-01 |
| ADAMTS3    | -0.15 | 5.58E-01 | -0.03 | 5.11E-01 | -0.14 | 5.56E-01 |
| ZNF805     | -0.15 | 5.58E-01 | 0.80  | 2.12E-01 | -1.60 | 9.45E-01 |
| CD34       | -0.15 | 5.59E-01 | -1.17 | 8.78E-01 | 0.50  | 3.07E-01 |
| ADIPOR2    | -0.15 | 5.59E-01 | -0.05 | 5.19E-01 | -0.36 | 6.41E-01 |
| PGBD5      | -0.15 | 5.59E-01 | -0.16 | 5.63E-01 | 0.58  | 2.81E-01 |
| ACYP1      | -0.15 | 5.59E-01 | 0.59  | 2.78E-01 | -0.79 | 7.85E-01 |

|          |       |          |       |          |       |          |
|----------|-------|----------|-------|----------|-------|----------|
| GLCCI1   | -0.15 | 5.59E-01 | 0.89  | 1.86E-01 | -0.65 | 7.42E-01 |
| AGPAT2   | -0.15 | 5.59E-01 | -0.78 | 7.84E-01 | 0.94  | 1.74E-01 |
| SURF6    | -0.15 | 5.59E-01 | 0.45  | 3.28E-01 | -0.18 | 5.72E-01 |
| AASDH    | -0.15 | 5.59E-01 | 0.58  | 2.82E-01 | -0.74 | 7.71E-01 |
| CLUH     | -0.15 | 5.59E-01 | 0.70  | 2.41E-01 | -1.14 | 8.74E-01 |
| TMEM54   | -0.15 | 5.59E-01 | 0.97  | 1.66E-01 | 1.65  | 4.92E-02 |
| MGAT5    | -0.15 | 5.59E-01 | -0.36 | 6.39E-01 | 0.73  | 2.33E-01 |
| PDCD11   | -0.15 | 5.59E-01 | 0.27  | 3.95E-01 | 0.10  | 4.62E-01 |
| FBXO32   | -0.15 | 5.59E-01 | -0.21 | 5.84E-01 | 0.32  | 3.75E-01 |
| SRGN     | -0.15 | 5.59E-01 | 0.86  | 1.95E-01 | -1.17 | 8.79E-01 |
| PCDHGB3  | -0.15 | 5.59E-01 | 0.75  | 2.28E-01 | 0.24  | 4.04E-01 |
| C10orf95 | -0.15 | 5.59E-01 | -0.05 | 5.20E-01 | -0.84 | 7.98E-01 |
| SHQ1     | -0.15 | 5.59E-01 | 0.36  | 3.58E-01 | -1.27 | 8.97E-01 |
| FFAR2    | -0.15 | 5.59E-01 | 0.93  | 1.76E-01 | -0.64 | 7.40E-01 |
| C1orf94  | -0.15 | 5.59E-01 | -0.34 | 6.34E-01 | 0.17  | 4.33E-01 |
| ZNF750   | -0.15 | 5.59E-01 | -0.96 | 8.31E-01 | 0.39  | 3.47E-01 |
| TSC22D4  | -0.15 | 5.59E-01 | -0.22 | 5.88E-01 | -0.87 | 8.07E-01 |
| EP300    | -0.15 | 5.60E-01 | 0.33  | 3.70E-01 | -1.42 | 9.23E-01 |
| ZBTB40   | -0.15 | 5.60E-01 | -0.63 | 7.37E-01 | -0.33 | 6.28E-01 |
| TIPARP   | -0.15 | 5.60E-01 | 1.71  | 4.41E-02 | -0.23 | 5.90E-01 |
| MICALCL  | -0.15 | 5.60E-01 | -1.08 | 8.59E-01 | 0.20  | 4.19E-01 |
| SCGB1D4  | -0.15 | 5.60E-01 | -0.18 | 5.73E-01 | -0.56 | 7.11E-01 |
| AHR      | -0.15 | 5.60E-01 | 0.11  | 4.56E-01 | -1.01 | 8.44E-01 |
| TPRKB    | -0.15 | 5.60E-01 | -0.16 | 5.64E-01 | -1.27 | 8.98E-01 |
| PCDHB8   | -0.15 | 5.60E-01 | -0.35 | 6.36E-01 | -1.08 | 8.60E-01 |
| ZNF430   | -0.15 | 5.60E-01 | -0.74 | 7.71E-01 | -0.04 | 5.15E-01 |
| GRHL3    | -0.15 | 5.60E-01 | -0.57 | 7.15E-01 | -0.51 | 6.94E-01 |
| PCDHB15  | -0.15 | 5.60E-01 | 0.04  | 4.85E-01 | -0.08 | 5.31E-01 |
| LRR61    | -0.15 | 5.60E-01 | -0.95 | 8.28E-01 | 0.47  | 3.18E-01 |
| USP10    | -0.15 | 5.60E-01 | -0.03 | 5.13E-01 | 1.09  | 1.39E-01 |
| HOXB8    | -0.15 | 5.60E-01 | -0.49 | 6.87E-01 | -0.72 | 7.65E-01 |

|         |       |          |       |          |       |          |
|---------|-------|----------|-------|----------|-------|----------|
| HSD17B6 | -0.15 | 5.61E-01 | 0.61  | 2.71E-01 | -1.85 | 9.68E-01 |
| ZNF114  | -0.15 | 5.61E-01 | -1.20 | 8.85E-01 | -0.29 | 6.13E-01 |
| RAB23   | -0.15 | 5.61E-01 | 0.06  | 4.74E-01 | -1.40 | 9.19E-01 |
| STT3B   | -0.15 | 5.61E-01 | -0.59 | 7.23E-01 | 1.21  | 1.14E-01 |
| ZBTB41  | -0.15 | 5.61E-01 | -0.81 | 7.92E-01 | -0.42 | 6.63E-01 |
| MMP1    | -0.15 | 5.61E-01 | -0.40 | 6.54E-01 | 0.71  | 2.40E-01 |
| NABP1   | -0.15 | 5.61E-01 | 0.54  | 2.96E-01 | -0.18 | 5.72E-01 |
| STOML1  | -0.15 | 5.61E-01 | -0.92 | 8.20E-01 | -0.51 | 6.95E-01 |
| NUP35   | -0.15 | 5.61E-01 | 0.38  | 3.51E-01 | -0.83 | 7.98E-01 |
| MTHFD2L | -0.15 | 5.61E-01 | -0.25 | 5.99E-01 | -0.53 | 7.03E-01 |
| IFFO1   | -0.15 | 5.61E-01 | -0.25 | 5.97E-01 | -0.72 | 7.63E-01 |
| NXT1    | -0.15 | 5.61E-01 | 0.01  | 4.96E-01 | -1.04 | 8.50E-01 |
| ADD2    | -0.15 | 5.61E-01 | 0.88  | 1.90E-01 | 0.65  | 2.59E-01 |
| ITGB5   | -0.15 | 5.61E-01 | -0.96 | 8.30E-01 | -0.18 | 5.72E-01 |
| NFKBIE  | -0.15 | 5.61E-01 | 0.22  | 4.14E-01 | -1.10 | 8.63E-01 |
| GOT2    | -0.15 | 5.61E-01 | 0.13  | 4.49E-01 | -0.32 | 6.27E-01 |
| DPT     | -0.15 | 5.61E-01 | -0.82 | 7.95E-01 | 0.79  | 2.16E-01 |
| STAM    | -0.15 | 5.61E-01 | 0.25  | 4.00E-01 | -1.02 | 8.46E-01 |
| ARPP21  | -0.15 | 5.62E-01 | -0.26 | 6.02E-01 | 0.92  | 1.79E-01 |
| AIMP2   | -0.15 | 5.62E-01 | -1.46 | 9.28E-01 | 0.85  | 1.98E-01 |
| RGR     | -0.15 | 5.62E-01 | -0.39 | 6.52E-01 | -0.10 | 5.41E-01 |
| CCDC86  | -0.15 | 5.62E-01 | 0.56  | 2.87E-01 | 0.22  | 4.13E-01 |
| GABRB1  | -0.16 | 5.62E-01 | -0.42 | 6.64E-01 | -0.13 | 5.50E-01 |
| ADRBK1  | -0.16 | 5.62E-01 | 0.95  | 1.71E-01 | 0.08  | 4.68E-01 |
| H1FO    | -0.16 | 5.62E-01 | -0.03 | 5.10E-01 | -1.47 | 9.29E-01 |
| SYT10   | -0.16 | 5.62E-01 | -0.03 | 5.11E-01 | 0.85  | 1.98E-01 |
| PRR9    | -0.16 | 5.62E-01 | -1.35 | 9.11E-01 | -0.13 | 5.52E-01 |
| GMIP    | -0.16 | 5.62E-01 | -0.06 | 5.26E-01 | -0.99 | 8.39E-01 |
| PCDHGA7 | -0.16 | 5.62E-01 | 0.90  | 1.84E-01 | 0.04  | 4.86E-01 |
| SLAMF9  | -0.16 | 5.62E-01 | -2.17 | 9.85E-01 | 0.55  | 2.90E-01 |
| ZNF705A | -0.16 | 5.62E-01 | -1.14 | 8.73E-01 | 0.82  | 2.06E-01 |



|            |       |          |       |          |       |          |
|------------|-------|----------|-------|----------|-------|----------|
| AC129492.6 | -0.16 | 5.62E-01 | -0.10 | 5.40E-01 | 0.12  | 4.52E-01 |
| SGK223     | -0.16 | 5.62E-01 | -0.06 | 5.25E-01 | -0.66 | 7.45E-01 |
| CABLES2    | -0.16 | 5.62E-01 | 0.72  | 2.36E-01 | 0.67  | 2.52E-01 |
| MYO10      | -0.16 | 5.62E-01 | 0.86  | 1.94E-01 | -1.55 | 9.39E-01 |
| OR51V1     | -0.16 | 5.62E-01 | 0.38  | 3.51E-01 | -0.75 | 7.72E-01 |
| SCYL3      | -0.16 | 5.62E-01 | 1.45  | 7.32E-02 | 1.28  | 1.01E-01 |
| NDUFB1     | -0.16 | 5.62E-01 | -0.23 | 5.91E-01 | -0.14 | 5.55E-01 |
| C20orf27   | -0.16 | 5.62E-01 | 0.74  | 2.28E-01 | -1.03 | 8.48E-01 |
| F2RL2      | -0.16 | 5.62E-01 | -0.37 | 6.45E-01 | 0.36  | 3.60E-01 |
| ZNF480     | -0.16 | 5.62E-01 | -0.42 | 6.62E-01 | 0.61  | 2.71E-01 |
| SEMA3D     | -0.16 | 5.62E-01 | -1.46 | 9.28E-01 | 0.40  | 3.45E-01 |
| LONRF1     | -0.16 | 5.62E-01 | 0.50  | 3.07E-01 | -0.17 | 5.69E-01 |
| CHRAC1     | -0.16 | 5.62E-01 | 0.58  | 2.80E-01 | -0.29 | 6.14E-01 |
| PIF1       | -0.16 | 5.63E-01 | -0.27 | 6.07E-01 | -0.52 | 6.98E-01 |
| TGIF2      | -0.16 | 5.63E-01 | -0.07 | 5.28E-01 | -0.64 | 7.40E-01 |
| CNTN6      | -0.16 | 5.63E-01 | 0.42  | 3.37E-01 | 0.13  | 4.47E-01 |
| MALL       | -0.16 | 5.63E-01 | 0.34  | 3.67E-01 | -1.92 | 9.73E-01 |
| CAMP       | -0.16 | 5.63E-01 | -0.07 | 5.28E-01 | -1.68 | 9.54E-01 |
| APOA1BP    | -0.16 | 5.63E-01 | 0.14  | 4.44E-01 | 1.45  | 7.38E-02 |
| FIGLA      | -0.16 | 5.63E-01 | -0.48 | 6.84E-01 | -0.20 | 5.81E-01 |
| LRRRC71    | -0.16 | 5.63E-01 | -0.56 | 7.13E-01 | -0.33 | 6.28E-01 |
| MTNR1A     | -0.16 | 5.63E-01 | -0.82 | 7.94E-01 | 0.42  | 3.36E-01 |
| C14orf37   | -0.16 | 5.63E-01 | 1.06  | 1.44E-01 | -0.63 | 7.36E-01 |
| PCDHGA6    | -0.16 | 5.63E-01 | 0.79  | 2.14E-01 | 0.20  | 4.19E-01 |
| HAUS2      | -0.16 | 5.63E-01 | 1.16  | 1.23E-01 | -0.54 | 7.07E-01 |
| SEZ6L      | -0.16 | 5.63E-01 | 1.16  | 1.22E-01 | -0.93 | 8.23E-01 |
| SESN1      | -0.16 | 5.63E-01 | 0.12  | 4.54E-01 | -0.87 | 8.08E-01 |
| MTHFSD     | -0.16 | 5.63E-01 | 0.47  | 3.18E-01 | -0.83 | 7.98E-01 |
| BARHL1     | -0.16 | 5.63E-01 | -0.98 | 8.36E-01 | -0.32 | 6.24E-01 |
| ARRB1      | -0.16 | 5.63E-01 | -0.53 | 7.02E-01 | -0.42 | 6.62E-01 |
| GALNT6     | -0.16 | 5.63E-01 | -0.39 | 6.51E-01 | -0.46 | 6.76E-01 |

|           |       |          |       |          |       |          |
|-----------|-------|----------|-------|----------|-------|----------|
| SCAMP3    | -0.16 | 5.63E-01 | -0.25 | 5.97E-01 | -0.87 | 8.07E-01 |
| NELFA     | -0.16 | 5.63E-01 | 0.75  | 2.27E-01 | 0.40  | 3.46E-01 |
| CDC42EP5  | -0.16 | 5.64E-01 | 0.09  | 4.65E-01 | -1.21 | 8.86E-01 |
| TMEM81    | -0.16 | 5.64E-01 | 0.97  | 1.67E-01 | -0.54 | 7.07E-01 |
| C21orf33  | -0.16 | 5.64E-01 | -0.69 | 7.54E-01 | -0.41 | 6.60E-01 |
| ADRA2A    | -0.16 | 5.64E-01 | 1.71  | 4.35E-02 | 0.00  | 4.99E-01 |
| DYDC1     | -0.16 | 5.64E-01 | 0.00  | 4.99E-01 | -0.81 | 7.91E-01 |
| IREB2     | -0.16 | 5.64E-01 | -0.60 | 7.25E-01 | 1.14  | 1.26E-01 |
| RAB1A     | -0.16 | 5.64E-01 | -0.52 | 6.98E-01 | 0.21  | 4.17E-01 |
| KCNIP2    | -0.16 | 5.64E-01 | 0.29  | 3.86E-01 | -0.75 | 7.73E-01 |
| PLAT      | -0.16 | 5.64E-01 | -0.36 | 6.42E-01 | -0.49 | 6.88E-01 |
| RPP14     | -0.16 | 5.64E-01 | -0.82 | 7.94E-01 | -0.52 | 6.99E-01 |
| KIF7      | -0.16 | 5.64E-01 | 0.53  | 2.97E-01 | -1.95 | 9.74E-01 |
| TBC1D13   | -0.16 | 5.64E-01 | -0.70 | 7.57E-01 | 0.24  | 4.03E-01 |
| IL16      | -0.16 | 5.64E-01 | 1.35  | 8.80E-02 | -1.23 | 8.90E-01 |
| TAS2R8    | -0.16 | 5.64E-01 | -1.08 | 8.60E-01 | -0.19 | 5.74E-01 |
| ANKRD35   | -0.16 | 5.64E-01 | -0.20 | 5.79E-01 | -0.91 | 8.17E-01 |
| RGS11     | -0.16 | 5.64E-01 | -0.64 | 7.37E-01 | -0.35 | 6.36E-01 |
| STAT5B    | -0.16 | 5.64E-01 | 0.89  | 1.86E-01 | -0.49 | 6.88E-01 |
| WDR65     | -0.16 | 5.64E-01 | 1.41  | 7.91E-02 | -1.34 | 9.10E-01 |
| NBEAL2    | -0.16 | 5.64E-01 | -0.86 | 8.06E-01 | 0.94  | 1.73E-01 |
| TSC22D1   | -0.16 | 5.64E-01 | 0.17  | 4.33E-01 | -0.68 | 7.52E-01 |
| FBXO42    | -0.16 | 5.64E-01 | -0.40 | 6.54E-01 | -1.29 | 9.02E-01 |
| NLRP1     | -0.16 | 5.64E-01 | -1.09 | 8.62E-01 | 0.15  | 4.41E-01 |
| OR10A6    | -0.16 | 5.65E-01 | -1.26 | 8.95E-01 | 0.19  | 4.25E-01 |
| EI24      | -0.16 | 5.65E-01 | 0.63  | 2.65E-01 | -1.71 | 9.56E-01 |
| C20orf187 | -0.16 | 5.65E-01 | 0.60  | 2.75E-01 | 0.15  | 4.40E-01 |
| NAAA      | -0.16 | 5.65E-01 | -0.58 | 7.20E-01 | -0.24 | 5.96E-01 |
| ZNF852    | -0.16 | 5.65E-01 | -0.78 | 7.83E-01 | 0.23  | 4.09E-01 |
| MTX3      | -0.16 | 5.65E-01 | 0.26  | 3.98E-01 | -1.44 | 9.26E-01 |
| GLB1L     | -0.16 | 5.65E-01 | -0.14 | 5.55E-01 | -0.51 | 6.96E-01 |

|          |       |          |       |          |       |          |
|----------|-------|----------|-------|----------|-------|----------|
| OR2H1    | -0.16 | 5.65E-01 | -0.69 | 7.55E-01 | 0.01  | 4.95E-01 |
| DPYSL4   | -0.16 | 5.65E-01 | 1.03  | 1.51E-01 | 1.75  | 3.98E-02 |
| SAMD8    | -0.16 | 5.65E-01 | 1.32  | 9.36E-02 | 0.82  | 2.05E-01 |
| NMS      | -0.16 | 5.65E-01 | 0.92  | 1.78E-01 | -0.24 | 5.96E-01 |
| ZNF268   | -0.16 | 5.65E-01 | 0.27  | 3.95E-01 | -1.05 | 8.53E-01 |
| GSDMB    | -0.16 | 5.65E-01 | -0.83 | 7.96E-01 | 0.18  | 4.28E-01 |
| RPL38    | -0.16 | 5.65E-01 | -0.31 | 6.22E-01 | -0.31 | 6.23E-01 |
| SAMD15   | -0.16 | 5.65E-01 | -0.87 | 8.08E-01 | -0.29 | 6.15E-01 |
| HEMGN    | -0.16 | 5.65E-01 | 0.11  | 4.56E-01 | -0.18 | 5.72E-01 |
| TM9SF2   | -0.16 | 5.65E-01 | -1.09 | 8.63E-01 | -0.23 | 5.92E-01 |
| S100A5   | -0.16 | 5.65E-01 | -1.16 | 8.77E-01 | 0.24  | 4.05E-01 |
| PKNOX1   | -0.17 | 5.66E-01 | -0.33 | 6.31E-01 | 0.44  | 3.31E-01 |
| FGF6     | -0.17 | 5.66E-01 | -0.65 | 7.43E-01 | -0.17 | 5.68E-01 |
| GORASP1  | -0.17 | 5.66E-01 | 0.00  | 5.01E-01 | 1.18  | 1.19E-01 |
| TBC1D23  | -0.17 | 5.66E-01 | -2.56 | 9.95E-01 | 0.88  | 1.90E-01 |
| ZMYM5    | -0.17 | 5.66E-01 | 0.37  | 3.54E-01 | -1.39 | 9.18E-01 |
| NFS1     | -0.17 | 5.66E-01 | -0.67 | 7.50E-01 | -0.67 | 7.50E-01 |
| CENPE    | -0.17 | 5.66E-01 | 0.66  | 2.54E-01 | -1.99 | 9.77E-01 |
| CRISPLD1 | -0.17 | 5.66E-01 | -0.62 | 7.33E-01 | 0.85  | 1.99E-01 |
| LEKR1    | -0.17 | 5.66E-01 | 2.09  | 1.83E-02 | -0.42 | 6.64E-01 |
| A4GNT    | -0.17 | 5.66E-01 | -0.41 | 6.58E-01 | 1.03  | 1.51E-01 |
| SAMD9    | -0.17 | 5.66E-01 | 0.41  | 3.40E-01 | -1.00 | 8.43E-01 |
| VTA1     | -0.17 | 5.66E-01 | -1.26 | 8.96E-01 | 0.57  | 2.85E-01 |
| AQP7     | -0.17 | 5.66E-01 | 1.63  | 5.20E-02 | 0.98  | 1.64E-01 |
| MAK      | -0.17 | 5.66E-01 | -0.27 | 6.05E-01 | 0.81  | 2.10E-01 |
| SERPINB5 | -0.17 | 5.66E-01 | 0.22  | 4.14E-01 | 0.31  | 3.78E-01 |
| MTA3     | -0.17 | 5.66E-01 | -1.33 | 9.09E-01 | 0.22  | 4.13E-01 |
| CCDC148  | -0.17 | 5.67E-01 | 0.02  | 4.91E-01 | -1.27 | 8.98E-01 |
| RIN3     | -0.17 | 5.67E-01 | 0.57  | 2.85E-01 | 0.05  | 4.79E-01 |
| PROK1    | -0.17 | 5.67E-01 | -0.53 | 7.01E-01 | -0.55 | 7.10E-01 |
| NUBP1    | -0.17 | 5.67E-01 | -0.05 | 5.21E-01 | 0.44  | 3.30E-01 |

|                |       |          |       |          |       |          |
|----------------|-------|----------|-------|----------|-------|----------|
| CYP2A6         | -0.17 | 5.67E-01 | -0.54 | 7.05E-01 | -0.40 | 6.57E-01 |
| TGIF2-C20orf24 | -0.17 | 5.67E-01 | -0.15 | 5.60E-01 | -0.94 | 8.28E-01 |
| CLMN           | -0.17 | 5.67E-01 | 1.85  | 3.22E-02 | 0.02  | 4.92E-01 |
| HNRNPR         | -0.17 | 5.67E-01 | 1.08  | 1.39E-01 | 0.15  | 4.42E-01 |
| CHCHD10        | -0.17 | 5.67E-01 | -1.30 | 9.03E-01 | 0.86  | 1.95E-01 |
| NOVA2          | -0.17 | 5.67E-01 | -0.27 | 6.07E-01 | 1.08  | 1.39E-01 |
| PAK7           | -0.17 | 5.67E-01 | -1.88 | 9.70E-01 | 0.21  | 4.17E-01 |
| SLC9B1         | -0.17 | 5.67E-01 | -0.48 | 6.86E-01 | -0.23 | 5.92E-01 |
| OR10G9         | -0.17 | 5.67E-01 | -0.88 | 8.10E-01 | -0.35 | 6.38E-01 |
| CSRP3          | -0.17 | 5.67E-01 | 0.75  | 2.27E-01 | 0.02  | 4.94E-01 |
| HOOK3          | -0.17 | 5.67E-01 | -0.88 | 8.10E-01 | 1.33  | 9.20E-02 |
| MRPS15         | -0.17 | 5.67E-01 | 0.12  | 4.51E-01 | -0.17 | 5.67E-01 |
| TNNT3          | -0.17 | 5.67E-01 | -0.33 | 6.28E-01 | -0.41 | 6.59E-01 |
| RTKN2          | -0.17 | 5.67E-01 | -0.16 | 5.65E-01 | 0.79  | 2.16E-01 |
| ZNF101         | -0.17 | 5.67E-01 | 1.08  | 1.40E-01 | -0.95 | 8.29E-01 |
| C19orf47       | -0.17 | 5.67E-01 | 0.74  | 2.30E-01 | 0.24  | 4.03E-01 |
| ELAVL1         | -0.17 | 5.68E-01 | 0.23  | 4.07E-01 | -1.22 | 8.89E-01 |
| ITGAD          | -0.17 | 5.68E-01 | -0.99 | 8.38E-01 | -0.34 | 6.33E-01 |
| GRAMD1C        | -0.17 | 5.68E-01 | -0.11 | 5.42E-01 | -0.02 | 5.07E-01 |
| POM121         | -0.17 | 5.68E-01 | -1.31 | 9.05E-01 | 0.72  | 2.37E-01 |
| DLEU7          | -0.17 | 5.68E-01 | 1.08  | 1.40E-01 | -0.88 | 8.11E-01 |
| SEC22A         | -0.17 | 5.68E-01 | -0.14 | 5.55E-01 | -0.65 | 7.43E-01 |
| UBE2Q1         | -0.17 | 5.68E-01 | -0.97 | 8.33E-01 | -0.21 | 5.85E-01 |
| KCTD9          | -0.17 | 5.68E-01 | 0.28  | 3.89E-01 | -1.28 | 9.00E-01 |
| ZNF92          | -0.17 | 5.68E-01 | -1.30 | 9.03E-01 | -0.02 | 5.08E-01 |
| GPR113         | -0.17 | 5.68E-01 | 0.18  | 4.30E-01 | -0.43 | 6.67E-01 |
| PRR23A         | -0.17 | 5.68E-01 | -0.20 | 5.79E-01 | -1.05 | 8.54E-01 |
| ZDHHC3         | -0.17 | 5.68E-01 | -1.01 | 8.44E-01 | 0.62  | 2.68E-01 |
| PCDHB17        | -0.17 | 5.68E-01 | -0.54 | 7.05E-01 | -1.03 | 8.49E-01 |
| CCDC92         | -0.17 | 5.68E-01 | -0.04 | 5.17E-01 | 0.80  | 2.11E-01 |
| NTMT1          | -0.17 | 5.68E-01 | 0.32  | 3.74E-01 | -0.07 | 5.30E-01 |

|          |       |          |       |          |       |          |
|----------|-------|----------|-------|----------|-------|----------|
| DCTN3    | -0.17 | 5.68E-01 | -0.03 | 5.10E-01 | 0.58  | 2.82E-01 |
| RBM12B   | -0.17 | 5.69E-01 | -0.51 | 6.94E-01 | -1.04 | 8.50E-01 |
| ZNF302   | -0.17 | 5.69E-01 | 0.19  | 4.23E-01 | -0.15 | 5.59E-01 |
| PCDHGC3  | -0.17 | 5.69E-01 | 1.18  | 1.18E-01 | -1.35 | 9.11E-01 |
| ZNF639   | -0.17 | 5.69E-01 | 0.23  | 4.10E-01 | -2.61 | 9.96E-01 |
| ADAM12   | -0.17 | 5.69E-01 | 0.08  | 4.66E-01 | 0.65  | 2.59E-01 |
| SEMA6A   | -0.17 | 5.69E-01 | -0.03 | 5.13E-01 | -0.17 | 5.66E-01 |
| RYK      | -0.17 | 5.69E-01 | -1.05 | 8.53E-01 | 2.06  | 1.95E-02 |
| NEK8     | -0.17 | 5.69E-01 | -0.24 | 5.96E-01 | -0.86 | 8.06E-01 |
| CEP290   | -0.17 | 5.69E-01 | 0.48  | 3.16E-01 | -0.78 | 7.82E-01 |
| SLC16A9  | -0.17 | 5.69E-01 | -1.00 | 8.41E-01 | -0.37 | 6.45E-01 |
| TENC1    | -0.17 | 5.69E-01 | -0.40 | 6.57E-01 | -0.59 | 7.21E-01 |
| LRRC42   | -0.17 | 5.69E-01 | -0.04 | 5.17E-01 | -0.08 | 5.30E-01 |
| ZNF333   | -0.17 | 5.69E-01 | -0.48 | 6.84E-01 | 1.04  | 1.49E-01 |
| TP53AIP1 | -0.18 | 5.70E-01 | -0.03 | 5.13E-01 | 1.64  | 5.08E-02 |
| NKX6-2   | -0.18 | 5.70E-01 | -0.71 | 7.61E-01 | 0.68  | 2.50E-01 |
| EIF1AD   | -0.18 | 5.70E-01 | -0.66 | 7.46E-01 | -0.48 | 6.86E-01 |
| PRB3     | -0.18 | 5.70E-01 | 0.54  | 2.95E-01 | -1.54 | 9.38E-01 |
| TCP11L2  | -0.18 | 5.70E-01 | -0.53 | 7.02E-01 | -0.41 | 6.59E-01 |
| SOCS6    | -0.18 | 5.70E-01 | -1.69 | 9.54E-01 | 0.83  | 2.05E-01 |
| PLCH1    | -0.18 | 5.70E-01 | 1.08  | 1.41E-01 | 0.28  | 3.89E-01 |
| CD109    | -0.18 | 5.70E-01 | -0.02 | 5.09E-01 | -0.56 | 7.14E-01 |
| ZNF618   | -0.18 | 5.70E-01 | 0.01  | 4.94E-01 | -0.66 | 7.45E-01 |
| C6orf120 | -0.18 | 5.70E-01 | -0.10 | 5.39E-01 | -0.11 | 5.43E-01 |
| C15orf37 | -0.18 | 5.70E-01 | -1.05 | 8.53E-01 | -0.77 | 7.79E-01 |
| CAPN8    | -0.18 | 5.70E-01 | 1.94  | 2.63E-02 | -1.26 | 8.97E-01 |
| CDH6     | -0.18 | 5.70E-01 | -1.01 | 8.45E-01 | 0.47  | 3.19E-01 |
| PON1     | -0.18 | 5.70E-01 | -0.24 | 5.94E-01 | -0.97 | 8.35E-01 |
| TMIE     | -0.18 | 5.71E-01 | -1.10 | 8.65E-01 | 0.72  | 2.35E-01 |
| GRK1     | -0.18 | 5.71E-01 | -0.20 | 5.81E-01 | -1.22 | 8.88E-01 |
| SLTM     | -0.18 | 5.71E-01 | 0.27  | 3.95E-01 | -0.76 | 7.77E-01 |

|          |       |          |       |          |       |          |
|----------|-------|----------|-------|----------|-------|----------|
| CASC4    | -0.18 | 5.71E-01 | 0.21  | 4.18E-01 | -0.32 | 6.25E-01 |
| SULT4A1  | -0.18 | 5.71E-01 | 0.39  | 3.48E-01 | 0.20  | 4.19E-01 |
| ABRA     | -0.18 | 5.71E-01 | 0.67  | 2.51E-01 | -1.50 | 9.33E-01 |
| NDUFA13  | -0.18 | 5.71E-01 | -0.90 | 8.17E-01 | -0.63 | 7.37E-01 |
| FIS1     | -0.18 | 5.71E-01 | 0.82  | 2.06E-01 | -0.29 | 6.13E-01 |
| ALG1     | -0.18 | 5.71E-01 | -1.04 | 8.50E-01 | 0.78  | 2.17E-01 |
| CRTC3    | -0.18 | 5.71E-01 | -0.05 | 5.19E-01 | 1.67  | 4.72E-02 |
| ANKRD12  | -0.18 | 5.71E-01 | 0.06  | 4.75E-01 | 0.48  | 3.16E-01 |
| HAND2    | -0.18 | 5.71E-01 | -0.88 | 8.11E-01 | 0.29  | 3.84E-01 |
| KPNB1    | -0.18 | 5.71E-01 | 0.64  | 2.60E-01 | 1.94  | 2.63E-02 |
| CKLF     | -0.18 | 5.71E-01 | -0.85 | 8.03E-01 | 0.43  | 3.34E-01 |
| OR52N4   | -0.18 | 5.71E-01 | 0.64  | 2.63E-01 | 1.24  | 1.08E-01 |
| HMG2     | -0.18 | 5.71E-01 | -0.28 | 6.12E-01 | -0.72 | 7.64E-01 |
| FAM162A  | -0.18 | 5.71E-01 | -0.06 | 5.23E-01 | -0.60 | 7.26E-01 |
| ADNP     | -0.18 | 5.71E-01 | -0.55 | 7.08E-01 | -0.11 | 5.43E-01 |
| TSHR     | -0.18 | 5.71E-01 | -1.37 | 9.15E-01 | 1.00  | 1.58E-01 |
| CCDC85C  | -0.18 | 5.71E-01 | -0.59 | 7.24E-01 | 0.13  | 4.47E-01 |
| JPH2     | -0.18 | 5.72E-01 | -0.79 | 7.87E-01 | -0.84 | 7.99E-01 |
| MORN3    | -0.18 | 5.72E-01 | -0.92 | 8.21E-01 | 0.97  | 1.66E-01 |
| ADRA1D   | -0.18 | 5.72E-01 | -0.39 | 6.50E-01 | -1.06 | 8.56E-01 |
| EXOSC4   | -0.18 | 5.72E-01 | 0.30  | 3.80E-01 | -1.42 | 9.23E-01 |
| KRTAP4-2 | -0.18 | 5.72E-01 | 0.08  | 4.68E-01 | -1.56 | 9.41E-01 |
| STRA8    | -0.18 | 5.72E-01 | -1.17 | 8.79E-01 | 0.44  | 3.30E-01 |
| TYSND1   | -0.18 | 5.72E-01 | 0.03  | 4.89E-01 | 0.89  | 1.85E-01 |
| SEPW1    | -0.18 | 5.72E-01 | -0.09 | 5.37E-01 | -0.41 | 6.60E-01 |
| ALDOA    | -0.18 | 5.72E-01 | 0.19  | 4.26E-01 | 0.18  | 4.29E-01 |
| STOML3   | -0.18 | 5.72E-01 | -0.69 | 7.54E-01 | 0.01  | 4.95E-01 |
| AQPEP    | -0.18 | 5.72E-01 | -0.05 | 5.21E-01 | -0.57 | 7.16E-01 |
| B3GNT8   | -0.18 | 5.72E-01 | 0.33  | 3.70E-01 | 0.79  | 2.15E-01 |
| DDOST    | -0.18 | 5.72E-01 | -0.69 | 7.56E-01 | -0.16 | 5.63E-01 |
| ACKR2    | -0.18 | 5.72E-01 | 0.33  | 3.69E-01 | 1.58  | 5.73E-02 |

|          |       |          |       |          |       |          |
|----------|-------|----------|-------|----------|-------|----------|
| TMEM141  | -0.18 | 5.72E-01 | -1.08 | 8.61E-01 | -0.01 | 5.03E-01 |
| CYP1A1   | -0.18 | 5.72E-01 | -1.24 | 8.92E-01 | 0.37  | 3.56E-01 |
| ATOX1    | -0.18 | 5.72E-01 | 0.87  | 1.93E-01 | 0.78  | 2.17E-01 |
| PRKD2    | -0.18 | 5.72E-01 | -0.21 | 5.82E-01 | 0.22  | 4.13E-01 |
| GPRIN3   | -0.18 | 5.72E-01 | -0.63 | 7.37E-01 | -0.71 | 7.61E-01 |
| PDSS1    | -0.18 | 5.72E-01 | 0.06  | 4.77E-01 | -1.10 | 8.65E-01 |
| SSTR1    | -0.18 | 5.72E-01 | -1.56 | 9.40E-01 | 0.18  | 4.30E-01 |
| HOXA11   | -0.18 | 5.72E-01 | 0.96  | 1.68E-01 | -1.10 | 8.64E-01 |
| KIAA0232 | -0.18 | 5.72E-01 | 0.57  | 2.85E-01 | -0.24 | 5.94E-01 |
| FETUB    | -0.18 | 5.72E-01 | 0.22  | 4.12E-01 | -2.30 | 9.89E-01 |
| ZNF232   | -0.18 | 5.72E-01 | -0.68 | 7.51E-01 | 0.31  | 3.80E-01 |
| UBC      | -0.18 | 5.72E-01 | -0.20 | 5.78E-01 | -0.09 | 5.37E-01 |
| CABP4    | -0.18 | 5.73E-01 | 0.29  | 3.85E-01 | -0.40 | 6.56E-01 |
| PPP1CB   | -0.18 | 5.73E-01 | 1.30  | 9.63E-02 | -0.43 | 6.67E-01 |
| BRAT1    | -0.18 | 5.73E-01 | -0.55 | 7.08E-01 | -0.02 | 5.09E-01 |
| MTFR1L   | -0.18 | 5.73E-01 | -0.92 | 8.20E-01 | -0.15 | 5.59E-01 |
| ANGEL1   | -0.18 | 5.73E-01 | -1.36 | 9.13E-01 | 0.02  | 4.92E-01 |
| SPRTN    | -0.18 | 5.73E-01 | 1.10  | 1.36E-01 | -0.02 | 5.09E-01 |
| FUT4     | -0.18 | 5.73E-01 | 1.20  | 1.15E-01 | -1.23 | 8.90E-01 |
| SLC52A1  | -0.18 | 5.73E-01 | 1.25  | 1.06E-01 | 0.07  | 4.71E-01 |
| ZNF74    | -0.18 | 5.73E-01 | -0.31 | 6.21E-01 | -0.91 | 8.20E-01 |
| ZNF595   | -0.18 | 5.73E-01 | -1.37 | 9.15E-01 | 1.19  | 1.17E-01 |
| MRPL55   | -0.18 | 5.73E-01 | -0.59 | 7.21E-01 | -0.25 | 5.99E-01 |
| TSSK1B   | -0.18 | 5.73E-01 | 0.13  | 4.48E-01 | 0.84  | 2.01E-01 |
| ADIRF    | -0.18 | 5.73E-01 | 0.09  | 4.62E-01 | 1.92  | 2.73E-02 |
| ARHGAP39 | -0.19 | 5.73E-01 | 1.56  | 5.98E-02 | 0.15  | 4.40E-01 |
| ZNF148   | -0.19 | 5.73E-01 | 1.07  | 1.42E-01 | 1.14  | 1.27E-01 |
| DIRAS1   | -0.19 | 5.74E-01 | -0.44 | 6.71E-01 | 0.94  | 1.74E-01 |
| NSMCE1   | -0.19 | 5.74E-01 | 1.37  | 8.59E-02 | -0.90 | 8.16E-01 |
| MAPK6    | -0.19 | 5.74E-01 | -1.25 | 8.95E-01 | 1.27  | 1.02E-01 |
| EDNRA    | -0.19 | 5.74E-01 | 0.77  | 2.20E-01 | -1.67 | 9.53E-01 |

|                |       |          |       |          |       |          |
|----------------|-------|----------|-------|----------|-------|----------|
| RNF38          | -0.19 | 5.74E-01 | -0.76 | 7.75E-01 | -0.44 | 6.71E-01 |
| PPP2R5A        | -0.19 | 5.74E-01 | 0.37  | 3.55E-01 | 1.20  | 1.16E-01 |
| SLC22A5        | -0.19 | 5.74E-01 | 0.09  | 4.65E-01 | 0.94  | 1.74E-01 |
| EGLN3          | -0.19 | 5.74E-01 | -0.44 | 6.70E-01 | 0.21  | 4.17E-01 |
| AMER3          | -0.19 | 5.74E-01 | 0.96  | 1.67E-01 | -0.52 | 6.99E-01 |
| IL2            | -0.19 | 5.74E-01 | 0.04  | 4.83E-01 | -0.02 | 5.09E-01 |
| PNKD           | -0.19 | 5.74E-01 | -0.82 | 7.94E-01 | -0.57 | 7.14E-01 |
| MRAS           | -0.19 | 5.75E-01 | 0.37  | 3.55E-01 | -0.44 | 6.71E-01 |
| DCST2          | -0.19 | 5.75E-01 | -0.13 | 5.52E-01 | -0.38 | 6.46E-01 |
| SLC25A45       | -0.19 | 5.75E-01 | -0.38 | 6.50E-01 | -0.41 | 6.61E-01 |
| RTEL1-TNFRSF6B | -0.19 | 5.75E-01 | 0.78  | 2.17E-01 | 0.27  | 3.95E-01 |
| PROP1          | -0.19 | 5.75E-01 | 0.51  | 3.04E-01 | 0.36  | 3.61E-01 |
| ZC2HC1A        | -0.19 | 5.75E-01 | -0.13 | 5.53E-01 | -0.55 | 7.09E-01 |
| SKOR1          | -0.19 | 5.75E-01 | 1.10  | 1.37E-01 | 0.72  | 2.36E-01 |
| ANKRD26        | -0.19 | 5.75E-01 | -1.86 | 9.69E-01 | 1.01  | 1.55E-01 |
| OSR1           | -0.19 | 5.75E-01 | 1.38  | 8.33E-02 | 0.24  | 4.04E-01 |
| PPT1           | -0.19 | 5.75E-01 | 0.18  | 4.30E-01 | -1.01 | 8.45E-01 |
| MOGS           | -0.19 | 5.75E-01 | -1.96 | 9.75E-01 | 0.34  | 3.65E-01 |
| BBS7           | -0.19 | 5.75E-01 | -0.64 | 7.40E-01 | 0.94  | 1.73E-01 |
| STAT6          | -0.19 | 5.75E-01 | 0.35  | 3.63E-01 | -0.67 | 7.49E-01 |
| ADAMTS6        | -0.19 | 5.75E-01 | 1.51  | 6.49E-02 | -1.30 | 9.03E-01 |
| TXLNA          | -0.19 | 5.75E-01 | -0.56 | 7.12E-01 | -0.46 | 6.78E-01 |
| ITIH5          | -0.19 | 5.75E-01 | 0.28  | 3.90E-01 | 0.66  | 2.56E-01 |
| RNASEH2B       | -0.19 | 5.75E-01 | 1.45  | 7.39E-02 | -1.37 | 9.14E-01 |
| YTHDC1         | -0.19 | 5.75E-01 | -0.22 | 5.88E-01 | -0.92 | 8.20E-01 |
| LIX1L          | -0.19 | 5.75E-01 | 0.29  | 3.87E-01 | -0.97 | 8.34E-01 |
| TAAR6          | -0.19 | 5.76E-01 | 1.10  | 1.35E-01 | -0.31 | 6.20E-01 |
| STEAP1B        | -0.19 | 5.76E-01 | -0.93 | 8.24E-01 | -0.06 | 5.24E-01 |
| ZNF202         | -0.19 | 5.76E-01 | -0.71 | 7.61E-01 | -0.43 | 6.65E-01 |
| TMEM63B        | -0.19 | 5.76E-01 | 1.81  | 3.52E-02 | -0.23 | 5.92E-01 |
| ERGIC1         | -0.19 | 5.76E-01 | 0.26  | 3.99E-01 | -0.54 | 7.05E-01 |



|           |       |          |       |          |       |          |
|-----------|-------|----------|-------|----------|-------|----------|
| SUN3      | -0.19 | 5.76E-01 | -1.29 | 9.01E-01 | 0.91  | 1.81E-01 |
| RABGAP1   | -0.19 | 5.76E-01 | 0.50  | 3.09E-01 | -2.63 | 9.96E-01 |
| RNF114    | -0.19 | 5.76E-01 | -0.11 | 5.44E-01 | -0.96 | 8.31E-01 |
| KIAA1279  | -0.19 | 5.76E-01 | -1.36 | 9.13E-01 | 0.02  | 4.91E-01 |
| BCAS2     | -0.19 | 5.76E-01 | -1.30 | 9.03E-01 | -0.13 | 5.51E-01 |
| TMED2     | -0.19 | 5.76E-01 | -0.53 | 7.01E-01 | 1.00  | 1.59E-01 |
| PSTPIP1   | -0.19 | 5.76E-01 | 0.54  | 2.94E-01 | -0.39 | 6.53E-01 |
| TMEM176B  | -0.19 | 5.76E-01 | 0.20  | 4.22E-01 | 1.29  | 9.80E-02 |
| RNF34     | -0.19 | 5.76E-01 | -0.44 | 6.68E-01 | -0.66 | 7.45E-01 |
| ODF1      | -0.19 | 5.76E-01 | -0.67 | 7.50E-01 | -0.17 | 5.66E-01 |
| KRTAP4-5  | -0.19 | 5.76E-01 | -0.43 | 6.65E-01 | -0.24 | 5.95E-01 |
| C20orf173 | -0.19 | 5.76E-01 | -0.29 | 6.16E-01 | -1.20 | 8.85E-01 |
| HSCB      | -0.19 | 5.76E-01 | -1.02 | 8.47E-01 | 0.44  | 3.32E-01 |
| GBX2      | -0.19 | 5.76E-01 | 0.25  | 4.02E-01 | -1.11 | 8.67E-01 |
| CATSPER3  | -0.19 | 5.76E-01 | 0.01  | 4.97E-01 | 0.27  | 3.95E-01 |
| UTP20     | -0.19 | 5.76E-01 | -0.77 | 7.79E-01 | 0.94  | 1.73E-01 |
| OTOG      | -0.19 | 5.76E-01 | -0.65 | 7.42E-01 | -1.48 | 9.31E-01 |
| TMEM182   | -0.19 | 5.76E-01 | 1.30  | 9.60E-02 | 0.79  | 2.16E-01 |
| STRIP2    | -0.19 | 5.76E-01 | -1.80 | 9.64E-01 | 0.46  | 3.24E-01 |
| KLF14     | -0.19 | 5.77E-01 | -0.27 | 6.06E-01 | -1.47 | 9.29E-01 |
| PAMR1     | -0.19 | 5.77E-01 | -0.12 | 5.48E-01 | 0.63  | 2.64E-01 |
| SLC25A52  | -0.19 | 5.77E-01 | -1.26 | 8.95E-01 | 0.00  | 5.01E-01 |
| KRT73     | -0.19 | 5.77E-01 | 0.77  | 2.22E-01 | -0.46 | 6.77E-01 |
| C20orf24  | -0.19 | 5.77E-01 | -0.05 | 5.21E-01 | -0.54 | 7.06E-01 |
| PHLDA3    | -0.19 | 5.77E-01 | -1.42 | 9.22E-01 | 0.16  | 4.38E-01 |
| P2RX6     | -0.19 | 5.77E-01 | -0.95 | 8.30E-01 | -0.96 | 8.31E-01 |
| PRELID2   | -0.19 | 5.77E-01 | 0.90  | 1.83E-01 | -0.57 | 7.16E-01 |
| GKAP1     | -0.19 | 5.77E-01 | 0.35  | 3.64E-01 | 2.31  | 1.04E-02 |
| SUPT4H1   | -0.19 | 5.77E-01 | 0.47  | 3.18E-01 | -1.30 | 9.03E-01 |
| MS4A8     | -0.19 | 5.77E-01 | -1.00 | 8.41E-01 | -0.06 | 5.25E-01 |
| RGMB      | -0.19 | 5.77E-01 | 0.04  | 4.83E-01 | 0.45  | 3.25E-01 |

|               |       |          |       |          |       |          |
|---------------|-------|----------|-------|----------|-------|----------|
| URI1          | -0.19 | 5.77E-01 | 0.12  | 4.54E-01 | -0.68 | 7.53E-01 |
| ZNF99         | -0.19 | 5.77E-01 | -1.33 | 9.07E-01 | 0.04  | 4.86E-01 |
| ARHGAP22      | -0.19 | 5.77E-01 | 1.06  | 1.44E-01 | 1.41  | 7.99E-02 |
| NDEL1         | -0.19 | 5.77E-01 | -0.18 | 5.71E-01 | 0.00  | 5.01E-01 |
| TMEM55A       | -0.20 | 5.77E-01 | 0.63  | 2.63E-01 | -1.91 | 9.72E-01 |
| CRTAM         | -0.20 | 5.77E-01 | -0.73 | 7.67E-01 | 0.06  | 4.76E-01 |
| CSNK1G3       | -0.20 | 5.77E-01 | 0.61  | 2.72E-01 | -1.50 | 9.34E-01 |
| TFEB          | -0.20 | 5.77E-01 | -1.12 | 8.70E-01 | 0.28  | 3.91E-01 |
| OLFM1         | -0.20 | 5.77E-01 | 0.66  | 2.54E-01 | -0.37 | 6.43E-01 |
| ERCC4         | -0.20 | 5.77E-01 | 1.09  | 1.38E-01 | -0.45 | 6.75E-01 |
| ZYG11B        | -0.20 | 5.78E-01 | 0.60  | 2.73E-01 | -0.52 | 6.98E-01 |
| RAVER2        | -0.20 | 5.78E-01 | -0.98 | 8.35E-01 | -0.21 | 5.83E-01 |
| EVA1B         | -0.20 | 5.78E-01 | 0.49  | 3.12E-01 | -0.65 | 7.41E-01 |
| TRIM49B       | -0.20 | 5.78E-01 | -0.54 | 7.04E-01 | 0.55  | 2.91E-01 |
| RUFY1         | -0.20 | 5.78E-01 | 0.79  | 2.14E-01 | -0.32 | 6.25E-01 |
| HIST1H4F      | -0.20 | 5.78E-01 | -0.31 | 6.21E-01 | 1.47  | 7.10E-02 |
| C4orf51       | -0.20 | 5.78E-01 | 0.02  | 4.92E-01 | -1.16 | 8.78E-01 |
| EMILIN2       | -0.20 | 5.78E-01 | 0.59  | 2.79E-01 | -0.74 | 7.69E-01 |
| KIAA0020      | -0.20 | 5.78E-01 | -0.53 | 7.02E-01 | 2.26  | 1.18E-02 |
| ZAR1          | -0.20 | 5.78E-01 | 0.51  | 3.06E-01 | -0.46 | 6.77E-01 |
| FPGT          | -0.20 | 5.78E-01 | -0.96 | 8.31E-01 | -0.31 | 6.23E-01 |
| LYPLA2        | -0.20 | 5.78E-01 | -0.67 | 7.48E-01 | 1.31  | 9.58E-02 |
| CHTF8         | -0.20 | 5.78E-01 | -1.38 | 9.16E-01 | 0.47  | 3.18E-01 |
| C16orf70      | -0.20 | 5.78E-01 | -1.64 | 9.49E-01 | -0.43 | 6.66E-01 |
| ZNF559-ZNF177 | -0.20 | 5.78E-01 | -0.88 | 8.10E-01 | -0.15 | 5.58E-01 |
| OR7A17        | -0.20 | 5.78E-01 | -0.56 | 7.13E-01 | -0.74 | 7.69E-01 |
| SGOL1         | -0.20 | 5.78E-01 | -1.06 | 8.56E-01 | 0.10  | 4.59E-01 |
| TNNC1         | -0.20 | 5.78E-01 | -0.97 | 8.35E-01 | 0.92  | 1.79E-01 |
| EFHD2         | -0.20 | 5.78E-01 | -0.47 | 6.80E-01 | -0.86 | 8.05E-01 |
| KCTD11        | -0.20 | 5.78E-01 | -0.60 | 7.26E-01 | -0.27 | 6.07E-01 |
| ZNF10         | -0.20 | 5.78E-01 | 0.31  | 3.80E-01 | -0.96 | 8.32E-01 |

|          |       |          |       |          |       |          |
|----------|-------|----------|-------|----------|-------|----------|
| EMX1     | -0.20 | 5.78E-01 | -0.33 | 6.30E-01 | -1.08 | 8.59E-01 |
| CABS1    | -0.20 | 5.79E-01 | -0.79 | 7.86E-01 | -0.36 | 6.42E-01 |
| PHYH     | -0.20 | 5.79E-01 | -1.89 | 9.71E-01 | 0.77  | 2.21E-01 |
| ABHD16B  | -0.20 | 5.79E-01 | 1.70  | 4.47E-02 | 0.77  | 2.20E-01 |
| ZNF177   | -0.20 | 5.79E-01 | -0.88 | 8.10E-01 | -0.15 | 5.59E-01 |
| USP20    | -0.20 | 5.79E-01 | 0.17  | 4.31E-01 | -0.44 | 6.68E-01 |
| FANCA    | -0.20 | 5.79E-01 | 0.07  | 4.72E-01 | -0.22 | 5.86E-01 |
| KIAA1328 | -0.20 | 5.79E-01 | -0.96 | 8.33E-01 | 1.25  | 1.05E-01 |
| NUP107   | -0.20 | 5.79E-01 | 0.27  | 3.94E-01 | -0.98 | 8.37E-01 |
| BDKRB2   | -0.20 | 5.79E-01 | -0.39 | 6.51E-01 | -0.97 | 8.35E-01 |
| HOXC4    | -0.20 | 5.79E-01 | -0.32 | 6.25E-01 | -0.95 | 8.30E-01 |
| ZDHHC12  | -0.20 | 5.79E-01 | 0.25  | 4.01E-01 | -2.47 | 9.93E-01 |
| EIF4E    | -0.20 | 5.79E-01 | 0.18  | 4.30E-01 | -0.43 | 6.65E-01 |
| SHE      | -0.20 | 5.79E-01 | -1.19 | 8.83E-01 | 0.64  | 2.60E-01 |
| SERPINB7 | -0.20 | 5.79E-01 | -0.72 | 7.65E-01 | -0.05 | 5.22E-01 |
| ALDH3A1  | -0.20 | 5.79E-01 | -0.59 | 7.23E-01 | 0.57  | 2.84E-01 |
| SUPT3H   | -0.20 | 5.79E-01 | -0.01 | 5.05E-01 | -1.04 | 8.51E-01 |
| CCIN     | -0.20 | 5.80E-01 | -0.20 | 5.80E-01 | -0.93 | 8.24E-01 |
| ADAMTS7  | -0.20 | 5.80E-01 | -0.32 | 6.25E-01 | -0.05 | 5.19E-01 |
| DNASE1L2 | -0.20 | 5.80E-01 | 0.87  | 1.91E-01 | -1.30 | 9.04E-01 |
| PCGF6    | -0.20 | 5.80E-01 | -0.37 | 6.43E-01 | -0.25 | 5.98E-01 |
| ENPP1    | -0.20 | 5.80E-01 | -0.70 | 7.60E-01 | -1.09 | 8.62E-01 |
| NHLRC1   | -0.20 | 5.80E-01 | 0.73  | 2.33E-01 | 0.95  | 1.70E-01 |
| VASH1    | -0.20 | 5.80E-01 | -0.66 | 7.46E-01 | -0.16 | 5.63E-01 |
| DLK1     | -0.20 | 5.80E-01 | -0.01 | 5.05E-01 | -0.05 | 5.21E-01 |
| ESPNL    | -0.20 | 5.80E-01 | 0.03  | 4.89E-01 | -1.29 | 9.01E-01 |
| ENGASE   | -0.20 | 5.80E-01 | -0.69 | 7.56E-01 | 0.78  | 2.18E-01 |
| SRP72    | -0.20 | 5.80E-01 | 0.62  | 2.68E-01 | -0.04 | 5.14E-01 |
| LRRC29   | -0.20 | 5.81E-01 | -1.04 | 8.51E-01 | -0.52 | 6.99E-01 |
| GAPDHS   | -0.20 | 5.81E-01 | -0.62 | 7.31E-01 | 0.64  | 2.60E-01 |
| FGB      | -0.20 | 5.81E-01 | -0.47 | 6.80E-01 | 1.17  | 1.21E-01 |

|           |       |          |       |          |       |          |
|-----------|-------|----------|-------|----------|-------|----------|
| GTF2F2    | -0.20 | 5.81E-01 | 1.07  | 1.41E-01 | 0.26  | 3.97E-01 |
| AOC3      | -0.20 | 5.81E-01 | -0.07 | 5.26E-01 | -0.69 | 7.54E-01 |
| KRTAP10-4 | -0.20 | 5.81E-01 | 0.12  | 4.52E-01 | -2.06 | 9.80E-01 |
| FASTKD5   | -0.20 | 5.81E-01 | -1.99 | 9.77E-01 | 0.45  | 3.28E-01 |
| GAL3ST1   | -0.20 | 5.81E-01 | 0.67  | 2.53E-01 | 0.08  | 4.66E-01 |
| C10orf32  | -0.20 | 5.81E-01 | -0.53 | 7.02E-01 | -0.89 | 8.13E-01 |
| DCDC2B    | -0.20 | 5.81E-01 | -1.05 | 8.54E-01 | -0.43 | 6.66E-01 |
| ZNF285    | -0.21 | 5.81E-01 | 0.73  | 2.32E-01 | -0.73 | 7.67E-01 |
| IL36G     | -0.21 | 5.81E-01 | 1.20  | 1.16E-01 | 0.03  | 4.88E-01 |
| PDILT     | -0.21 | 5.82E-01 | 0.99  | 1.61E-01 | -0.28 | 6.08E-01 |
| PPP1R15B  | -0.21 | 5.82E-01 | 0.18  | 4.27E-01 | -0.08 | 5.33E-01 |
| YJEFN3    | -0.21 | 5.82E-01 | -0.96 | 8.31E-01 | -0.65 | 7.43E-01 |
| WDR59     | -0.21 | 5.82E-01 | 0.22  | 4.14E-01 | 0.33  | 3.72E-01 |
| YWHAZ     | -0.21 | 5.82E-01 | -1.68 | 9.53E-01 | 0.31  | 3.77E-01 |
| SPARC     | -0.21 | 5.82E-01 | -0.58 | 7.19E-01 | -0.32 | 6.25E-01 |
| RC3H1     | -0.21 | 5.82E-01 | 1.03  | 1.52E-01 | -0.20 | 5.80E-01 |
| JAM3      | -0.21 | 5.82E-01 | 0.15  | 4.41E-01 | 1.02  | 1.54E-01 |
| ARMC8     | -0.21 | 5.82E-01 | -0.87 | 8.08E-01 | 0.27  | 3.92E-01 |
| PRDX1     | -0.21 | 5.82E-01 | -0.04 | 5.15E-01 | -1.62 | 9.47E-01 |
| LACTBL1   | -0.21 | 5.82E-01 | 1.17  | 1.21E-01 | 0.03  | 4.87E-01 |
| MIS18A    | -0.21 | 5.82E-01 | -1.35 | 9.11E-01 | -0.20 | 5.81E-01 |
| HOXA6     | -0.21 | 5.82E-01 | 0.43  | 3.34E-01 | 0.21  | 4.18E-01 |
| ZYG11A    | -0.21 | 5.83E-01 | 0.58  | 2.82E-01 | -0.68 | 7.52E-01 |
| BPIFB6    | -0.21 | 5.83E-01 | 0.43  | 3.35E-01 | -0.69 | 7.56E-01 |
| PFDN4     | -0.21 | 5.83E-01 | 1.31  | 9.57E-02 | -0.58 | 7.20E-01 |
| PCDHGA12  | -0.21 | 5.83E-01 | 1.07  | 1.41E-01 | -0.72 | 7.65E-01 |
| ANKRD62   | -0.21 | 5.83E-01 | -1.53 | 9.38E-01 | 0.86  | 1.94E-01 |
| ICMT      | -0.21 | 5.83E-01 | -0.07 | 5.29E-01 | -0.42 | 6.62E-01 |
| IL27RA    | -0.21 | 5.83E-01 | 0.07  | 4.72E-01 | -1.58 | 9.43E-01 |
| ATL2      | -0.21 | 5.83E-01 | -0.18 | 5.72E-01 | -0.55 | 7.08E-01 |
| ITGAV     | -0.21 | 5.83E-01 | 1.11  | 1.33E-01 | 0.47  | 3.19E-01 |

|              |       |          |       |          |       |          |
|--------------|-------|----------|-------|----------|-------|----------|
| CRAMP1L      | -0.21 | 5.83E-01 | -0.60 | 7.27E-01 | -0.44 | 6.68E-01 |
| TJP3         | -0.21 | 5.83E-01 | 0.14  | 4.46E-01 | -0.87 | 8.08E-01 |
| MYO19        | -0.21 | 5.83E-01 | -1.15 | 8.75E-01 | -0.10 | 5.38E-01 |
| METTL1       | -0.21 | 5.83E-01 | 0.10  | 4.60E-01 | -0.25 | 6.00E-01 |
| HEPACAM2     | -0.21 | 5.83E-01 | -0.59 | 7.23E-01 | -0.30 | 6.18E-01 |
| BMPR1A       | -0.21 | 5.83E-01 | 0.94  | 1.72E-01 | -1.22 | 8.90E-01 |
| CCT6B        | -0.21 | 5.83E-01 | -0.80 | 7.88E-01 | -0.27 | 6.07E-01 |
| C10orf40     | -0.21 | 5.83E-01 | -0.76 | 7.76E-01 | -0.06 | 5.26E-01 |
| TTYH1        | -0.21 | 5.83E-01 | 0.27  | 3.95E-01 | 0.38  | 3.53E-01 |
| STARD10      | -0.21 | 5.84E-01 | -0.38 | 6.47E-01 | 0.55  | 2.90E-01 |
| APCDD1L      | -0.21 | 5.84E-01 | -0.84 | 8.01E-01 | -0.53 | 7.02E-01 |
| SGPP2        | -0.21 | 5.84E-01 | 0.66  | 2.56E-01 | 0.30  | 3.82E-01 |
| TPK1         | -0.21 | 5.84E-01 | -1.55 | 9.39E-01 | 1.50  | 6.72E-02 |
| CLDN16       | -0.21 | 5.84E-01 | -0.81 | 7.90E-01 | 0.62  | 2.66E-01 |
| CLEC12B      | -0.21 | 5.84E-01 | 0.19  | 4.26E-01 | -1.62 | 9.48E-01 |
| DEGS1        | -0.21 | 5.84E-01 | 1.05  | 1.46E-01 | -0.31 | 6.20E-01 |
| BTBD16       | -0.21 | 5.84E-01 | -0.21 | 5.82E-01 | -0.23 | 5.89E-01 |
| LHFPL4       | -0.21 | 5.84E-01 | 0.52  | 3.01E-01 | -0.86 | 8.06E-01 |
| HOXB4        | -0.21 | 5.84E-01 | -1.56 | 9.41E-01 | 0.91  | 1.81E-01 |
| CATSPER4     | -0.21 | 5.84E-01 | 0.10  | 4.61E-01 | -0.98 | 8.36E-01 |
| C8orf44      | -0.21 | 5.84E-01 | 0.16  | 4.38E-01 | -1.08 | 8.61E-01 |
| BNIP1        | -0.21 | 5.84E-01 | 0.40  | 3.46E-01 | 0.37  | 3.55E-01 |
| LRRN4CL      | -0.21 | 5.84E-01 | 0.16  | 4.37E-01 | -1.44 | 9.25E-01 |
| GRM2         | -0.21 | 5.84E-01 | -1.27 | 8.97E-01 | 0.02  | 4.94E-01 |
| ATP6V1D      | -0.21 | 5.85E-01 | -0.10 | 5.40E-01 | 0.10  | 4.59E-01 |
| ZNF625-ZNF20 | -0.21 | 5.85E-01 | -0.04 | 5.18E-01 | -0.26 | 6.02E-01 |
| SLC25A27     | -0.21 | 5.85E-01 | -0.02 | 5.09E-01 | -0.49 | 6.89E-01 |
| PLK1         | -0.21 | 5.85E-01 | 0.21  | 4.15E-01 | -1.04 | 8.52E-01 |
| AGK          | -0.21 | 5.85E-01 | 0.39  | 3.47E-01 | -0.82 | 7.95E-01 |
| SLC22A17     | -0.21 | 5.85E-01 | -1.67 | 9.53E-01 | 0.43  | 3.33E-01 |
| C22orf46     | -0.21 | 5.85E-01 | 0.08  | 4.67E-01 | -1.90 | 9.71E-01 |

|          |       |          |       |          |       |          |
|----------|-------|----------|-------|----------|-------|----------|
| OR4D9    | -0.21 | 5.85E-01 | -1.17 | 8.79E-01 | -0.48 | 6.85E-01 |
| GBP3     | -0.21 | 5.85E-01 | 0.72  | 2.35E-01 | -0.30 | 6.18E-01 |
| NPW      | -0.21 | 5.85E-01 | -1.48 | 9.31E-01 | 0.64  | 2.60E-01 |
| WDR60    | -0.21 | 5.85E-01 | 0.41  | 3.42E-01 | 0.71  | 2.39E-01 |
| WDR72    | -0.21 | 5.85E-01 | 0.27  | 3.94E-01 | -1.62 | 9.47E-01 |
| LDHC     | -0.22 | 5.85E-01 | -0.42 | 6.62E-01 | -1.18 | 8.81E-01 |
| BAALC    | -0.22 | 5.85E-01 | -0.81 | 7.90E-01 | -0.29 | 6.16E-01 |
| NOSIP    | -0.22 | 5.85E-01 | -0.39 | 6.53E-01 | 0.07  | 4.73E-01 |
| CAGE1    | -0.22 | 5.85E-01 | -0.88 | 8.11E-01 | -0.46 | 6.76E-01 |
| RPL26    | -0.22 | 5.85E-01 | 1.49  | 6.75E-02 | 0.43  | 3.35E-01 |
| PDE7A    | -0.22 | 5.86E-01 | -1.08 | 8.59E-01 | 0.71  | 2.39E-01 |
| RBM34    | -0.22 | 5.86E-01 | -0.33 | 6.28E-01 | -0.48 | 6.84E-01 |
| ENDOV    | -0.22 | 5.86E-01 | -0.75 | 7.73E-01 | -1.24 | 8.92E-01 |
| RBPJL    | -0.22 | 5.86E-01 | -0.13 | 5.50E-01 | -1.64 | 9.49E-01 |
| CCDC57   | -0.22 | 5.86E-01 | -0.09 | 5.37E-01 | -0.51 | 6.95E-01 |
| ITPRIPL2 | -0.22 | 5.86E-01 | -0.91 | 8.18E-01 | -0.43 | 6.68E-01 |
| LMTK3    | -0.22 | 5.86E-01 | -0.62 | 7.31E-01 | 0.14  | 4.45E-01 |
| FAM65C   | -0.22 | 5.86E-01 | -0.93 | 8.23E-01 | 1.50  | 6.64E-02 |
| ZNF32    | -0.22 | 5.86E-01 | -0.41 | 6.60E-01 | -0.20 | 5.81E-01 |
| MAP3K6   | -0.22 | 5.86E-01 | 0.51  | 3.07E-01 | -1.10 | 8.63E-01 |
| WDFY1    | -0.22 | 5.86E-01 | -0.57 | 7.15E-01 | -0.48 | 6.85E-01 |
| PHC2     | -0.22 | 5.86E-01 | 0.55  | 2.91E-01 | 0.19  | 4.24E-01 |
| TRMT112  | -0.22 | 5.86E-01 | -0.03 | 5.14E-01 | -1.08 | 8.60E-01 |
| STRN4    | -0.22 | 5.86E-01 | -0.30 | 6.18E-01 | 0.28  | 3.89E-01 |
| MIEN1    | -0.22 | 5.86E-01 | -0.52 | 6.99E-01 | -0.67 | 7.47E-01 |
| REEP2    | -0.22 | 5.86E-01 | -0.74 | 7.71E-01 | 1.02  | 1.53E-01 |
| PDGFD    | -0.22 | 5.86E-01 | -0.64 | 7.40E-01 | 0.86  | 1.94E-01 |
| OR10J3   | -0.22 | 5.86E-01 | -0.17 | 5.68E-01 | -0.69 | 7.53E-01 |
| KRT24    | -0.22 | 5.86E-01 | -0.28 | 6.11E-01 | 0.08  | 4.68E-01 |
| CLEC4F   | -0.22 | 5.86E-01 | 1.44  | 7.48E-02 | -1.35 | 9.12E-01 |
| SMTN     | -0.22 | 5.86E-01 | 0.03  | 4.86E-01 | -1.62 | 9.48E-01 |

|          |       |          |       |          |       |          |
|----------|-------|----------|-------|----------|-------|----------|
| HEXIM1   | -0.22 | 5.86E-01 | -0.51 | 6.96E-01 | -0.55 | 7.07E-01 |
| E2F2     | -0.22 | 5.86E-01 | 0.84  | 1.99E-01 | -0.37 | 6.45E-01 |
| SCAND1   | -0.22 | 5.86E-01 | -0.94 | 8.26E-01 | -0.72 | 7.64E-01 |
| TAS2R3   | -0.22 | 5.87E-01 | -0.08 | 5.31E-01 | -0.72 | 7.64E-01 |
| NOSTRIN  | -0.22 | 5.87E-01 | -1.44 | 9.25E-01 | 1.04  | 1.49E-01 |
| PIGB     | -0.22 | 5.87E-01 | 0.22  | 4.13E-01 | -1.63 | 9.49E-01 |
| KPNA6    | -0.22 | 5.87E-01 | -0.73 | 7.68E-01 | -0.16 | 5.64E-01 |
| ZNF506   | -0.22 | 5.87E-01 | 0.17  | 4.33E-01 | 0.04  | 4.84E-01 |
| ABCA7    | -0.22 | 5.87E-01 | -2.13 | 9.83E-01 | 0.60  | 2.74E-01 |
| SEC63    | -0.22 | 5.87E-01 | -0.28 | 6.10E-01 | -0.56 | 7.12E-01 |
| SCNN1D   | -0.22 | 5.87E-01 | -0.51 | 6.96E-01 | -0.10 | 5.38E-01 |
| GKN1     | -0.22 | 5.87E-01 | -0.08 | 5.33E-01 | -0.28 | 6.11E-01 |
| MCM10    | -0.22 | 5.87E-01 | -0.06 | 5.23E-01 | -1.27 | 8.98E-01 |
| MAP4K5   | -0.22 | 5.87E-01 | 0.87  | 1.92E-01 | -1.28 | 8.99E-01 |
| SNTB2    | -0.22 | 5.87E-01 | -1.18 | 8.80E-01 | 1.60  | 5.52E-02 |
| PIGM     | -0.22 | 5.87E-01 | 0.16  | 4.35E-01 | -0.52 | 7.00E-01 |
| OSTC     | -0.22 | 5.87E-01 | -0.53 | 7.02E-01 | 0.56  | 2.87E-01 |
| ICAM3    | -0.22 | 5.87E-01 | -1.07 | 8.59E-01 | 0.19  | 4.25E-01 |
| C9orf62  | -0.22 | 5.87E-01 | -0.21 | 5.85E-01 | -0.04 | 5.15E-01 |
| ZZEF1    | -0.22 | 5.87E-01 | 0.49  | 3.13E-01 | -0.01 | 5.03E-01 |
| OTOP3    | -0.22 | 5.87E-01 | -0.31 | 6.24E-01 | 0.36  | 3.58E-01 |
| ADARB1   | -0.22 | 5.87E-01 | -1.10 | 8.64E-01 | 0.09  | 4.66E-01 |
| SNRPB    | -0.22 | 5.87E-01 | -0.71 | 7.62E-01 | 0.52  | 3.03E-01 |
| GDAP1    | -0.22 | 5.88E-01 | 0.53  | 2.98E-01 | -0.72 | 7.65E-01 |
| CDC14A   | -0.22 | 5.88E-01 | -0.58 | 7.19E-01 | 0.26  | 3.98E-01 |
| SPATA19  | -0.22 | 5.88E-01 | -0.06 | 5.23E-01 | 0.52  | 3.00E-01 |
| CNKSR3   | -0.22 | 5.88E-01 | -0.37 | 6.45E-01 | -1.24 | 8.92E-01 |
| KRT18    | -0.22 | 5.88E-01 | -0.84 | 7.99E-01 | -0.62 | 7.32E-01 |
| SPRR2D   | -0.22 | 5.88E-01 | -0.14 | 5.57E-01 | -1.49 | 9.32E-01 |
| C17orf47 | -0.22 | 5.88E-01 | 0.77  | 2.21E-01 | 0.27  | 3.93E-01 |
| OR6N1    | -0.22 | 5.88E-01 | -0.91 | 8.20E-01 | -0.35 | 6.37E-01 |

|           |       |          |       |          |       |          |
|-----------|-------|----------|-------|----------|-------|----------|
| OPN1SW    | -0.22 | 5.88E-01 | -1.17 | 8.80E-01 | 0.33  | 3.70E-01 |
| PM20D1    | -0.22 | 5.88E-01 | -0.42 | 6.61E-01 | 0.41  | 3.41E-01 |
| ZNF485    | -0.22 | 5.88E-01 | -0.21 | 5.81E-01 | -0.06 | 5.25E-01 |
| DNAJC4    | -0.22 | 5.88E-01 | 0.25  | 4.02E-01 | 0.97  | 1.67E-01 |
| ADAMTS18  | -0.22 | 5.88E-01 | 0.03  | 4.86E-01 | -0.69 | 7.56E-01 |
| ABCC1     | -0.22 | 5.88E-01 | -0.17 | 5.67E-01 | -0.53 | 7.04E-01 |
| C19orf52  | -0.22 | 5.88E-01 | 0.62  | 2.68E-01 | -1.42 | 9.22E-01 |
| SAYSD1    | -0.22 | 5.88E-01 | -1.60 | 9.46E-01 | 0.38  | 3.51E-01 |
| ZRANB3    | -0.22 | 5.88E-01 | -0.59 | 7.24E-01 | -0.22 | 5.86E-01 |
| SNX19     | -0.22 | 5.88E-01 | -0.36 | 6.40E-01 | -1.34 | 9.10E-01 |
| FKBP14    | -0.22 | 5.88E-01 | -0.56 | 7.12E-01 | 0.27  | 3.94E-01 |
| GID8      | -0.22 | 5.88E-01 | 1.57  | 5.81E-02 | -0.58 | 7.18E-01 |
| PSRC1     | -0.22 | 5.88E-01 | -0.57 | 7.17E-01 | 0.10  | 4.59E-01 |
| MAB21L2   | -0.22 | 5.89E-01 | -0.61 | 7.29E-01 | 0.13  | 4.50E-01 |
| ARHGEF10L | -0.22 | 5.89E-01 | -0.64 | 7.39E-01 | -0.40 | 6.55E-01 |
| TTC4      | -0.22 | 5.89E-01 | 1.73  | 4.23E-02 | 0.70  | 2.43E-01 |
| C8orf47   | -0.22 | 5.89E-01 | 1.87  | 3.06E-02 | 0.53  | 3.00E-01 |
| SCCPDH    | -0.22 | 5.89E-01 | 0.86  | 1.94E-01 | 1.10  | 1.36E-01 |
| RABL5     | -0.22 | 5.89E-01 | 0.59  | 2.77E-01 | -0.75 | 7.73E-01 |
| CD2       | -0.22 | 5.89E-01 | 3.13  | 8.61E-04 | 1.89  | 2.95E-02 |
| GAB4      | -0.22 | 5.89E-01 | 1.68  | 4.67E-02 | -0.46 | 6.76E-01 |
| CCSER2    | -0.22 | 5.89E-01 | -0.80 | 7.88E-01 | -0.06 | 5.25E-01 |
| RAPGEF1   | -0.22 | 5.89E-01 | -0.04 | 5.16E-01 | -0.78 | 7.82E-01 |
| CHPT1     | -0.22 | 5.89E-01 | 0.33  | 3.72E-01 | 0.47  | 3.19E-01 |
| AAGAB     | -0.22 | 5.89E-01 | 1.76  | 3.92E-02 | -0.05 | 5.19E-01 |
| PRKCDBP   | -0.22 | 5.89E-01 | -1.93 | 9.73E-01 | 0.51  | 3.06E-01 |
| STAP1     | -0.23 | 5.89E-01 | -1.93 | 9.73E-01 | -0.10 | 5.39E-01 |
| ELAC1     | -0.23 | 5.89E-01 | -1.45 | 9.27E-01 | 0.99  | 1.61E-01 |
| THSD1     | -0.23 | 5.89E-01 | -0.58 | 7.20E-01 | 0.38  | 3.51E-01 |
| KCNAB2    | -0.23 | 5.89E-01 | -0.40 | 6.56E-01 | -0.43 | 6.68E-01 |
| NFKBIZ    | -0.23 | 5.89E-01 | 0.60  | 2.73E-01 | -0.20 | 5.79E-01 |



|             |       |          |       |          |       |          |
|-------------|-------|----------|-------|----------|-------|----------|
| SUPT20H     | -0.23 | 5.89E-01 | 0.59  | 2.78E-01 | 0.13  | 4.49E-01 |
| ZNF578      | -0.23 | 5.89E-01 | -0.22 | 5.86E-01 | -0.56 | 7.12E-01 |
| GPR142      | -0.23 | 5.89E-01 | -0.14 | 5.54E-01 | -1.06 | 8.54E-01 |
| RPS7        | -0.23 | 5.89E-01 | 0.71  | 2.39E-01 | -0.18 | 5.70E-01 |
| NUMBL       | -0.23 | 5.89E-01 | -0.43 | 6.68E-01 | -0.81 | 7.90E-01 |
| C8orf88     | -0.23 | 5.90E-01 | 0.53  | 2.98E-01 | -1.78 | 9.63E-01 |
| SHOX2       | -0.23 | 5.90E-01 | -0.33 | 6.28E-01 | 0.08  | 4.67E-01 |
| YBEY        | -0.23 | 5.90E-01 | -0.13 | 5.50E-01 | -0.09 | 5.36E-01 |
| LRTM1       | -0.23 | 5.90E-01 | -0.48 | 6.85E-01 | -0.74 | 7.71E-01 |
| C17orf51    | -0.23 | 5.90E-01 | 0.06  | 4.75E-01 | -1.00 | 8.41E-01 |
| DEFA6       | -0.23 | 5.90E-01 | 0.69  | 2.44E-01 | -0.20 | 5.81E-01 |
| ACSS1       | -0.23 | 5.90E-01 | -1.54 | 9.38E-01 | 0.36  | 3.59E-01 |
| PPAN-P2RY11 | -0.23 | 5.90E-01 | -1.97 | 9.75E-01 | 0.65  | 2.56E-01 |
| PPAN        | -0.23 | 5.90E-01 | -1.97 | 9.75E-01 | 0.65  | 2.56E-01 |
| SLC25A48    | -0.23 | 5.90E-01 | 0.22  | 4.13E-01 | -0.98 | 8.36E-01 |
| TMEM254     | -0.23 | 5.90E-01 | -1.07 | 8.57E-01 | 0.51  | 3.04E-01 |
| PUS3        | -0.23 | 5.90E-01 | 0.00  | 5.01E-01 | -2.04 | 9.79E-01 |
| NIF3L1      | -0.23 | 5.90E-01 | 0.27  | 3.93E-01 | -0.67 | 7.48E-01 |
| PIWIL1      | -0.23 | 5.90E-01 | -0.13 | 5.52E-01 | 0.47  | 3.20E-01 |
| OR2W1       | -0.23 | 5.90E-01 | 0.51  | 3.05E-01 | -0.65 | 7.41E-01 |
| OR111       | -0.23 | 5.90E-01 | 0.00  | 4.99E-01 | -1.20 | 8.85E-01 |
| RRP1B       | -0.23 | 5.91E-01 | 0.26  | 3.97E-01 | -0.85 | 8.01E-01 |
| ARL5A       | -0.23 | 5.91E-01 | -0.23 | 5.90E-01 | -0.74 | 7.70E-01 |
| ZSCAN5D     | -0.23 | 5.91E-01 | -0.57 | 7.15E-01 | -0.53 | 7.03E-01 |
| PCBP3       | -0.23 | 5.91E-01 | -0.22 | 5.88E-01 | 0.77  | 2.21E-01 |
| ZRANB2      | -0.23 | 5.91E-01 | 0.58  | 2.81E-01 | 0.38  | 3.52E-01 |
| DAW1        | -0.23 | 5.91E-01 | -0.19 | 5.77E-01 | -1.04 | 8.51E-01 |
| ITPKC       | -0.23 | 5.91E-01 | -1.06 | 8.55E-01 | -0.23 | 5.91E-01 |
| PIGX        | -0.23 | 5.91E-01 | -0.42 | 6.65E-01 | -0.04 | 5.15E-01 |
| CCT5        | -0.23 | 5.91E-01 | 0.49  | 3.12E-01 | -0.52 | 6.98E-01 |
| NMB         | -0.23 | 5.91E-01 | 0.71  | 2.38E-01 | 0.57  | 2.85E-01 |

|            |       |          |       |          |       |          |
|------------|-------|----------|-------|----------|-------|----------|
| MYH3       | -0.23 | 5.91E-01 | -0.85 | 8.01E-01 | -0.22 | 5.89E-01 |
| KIAA1191   | -0.23 | 5.91E-01 | -1.03 | 8.48E-01 | -0.76 | 7.78E-01 |
| RUVBL1     | -0.23 | 5.91E-01 | -1.43 | 9.24E-01 | 0.19  | 4.24E-01 |
| TNFRSF13C  | -0.23 | 5.91E-01 | 0.36  | 3.59E-01 | 0.85  | 1.98E-01 |
| TBCEL      | -0.23 | 5.91E-01 | -0.69 | 7.54E-01 | 0.97  | 1.66E-01 |
| PRKAA1     | -0.23 | 5.91E-01 | -0.67 | 7.49E-01 | -0.63 | 7.35E-01 |
| STARD13    | -0.23 | 5.91E-01 | 0.69  | 2.45E-01 | 0.74  | 2.28E-01 |
| KRTAP10-11 | -0.23 | 5.91E-01 | -0.33 | 6.31E-01 | -0.66 | 7.44E-01 |
| PAX2       | -0.23 | 5.91E-01 | -1.03 | 8.49E-01 | -0.25 | 5.98E-01 |
| C11orf84   | -0.23 | 5.91E-01 | -0.58 | 7.18E-01 | 0.19  | 4.26E-01 |
| FAM13A     | -0.23 | 5.91E-01 | 0.83  | 2.05E-01 | -0.80 | 7.88E-01 |
| DHFR       | -0.23 | 5.91E-01 | 0.15  | 4.40E-01 | -0.38 | 6.47E-01 |
| UNG        | -0.23 | 5.91E-01 | -0.05 | 5.19E-01 | 0.32  | 3.75E-01 |
| RALA       | -0.23 | 5.91E-01 | -0.10 | 5.39E-01 | -1.04 | 8.50E-01 |
| ROM1       | -0.23 | 5.91E-01 | 0.48  | 3.15E-01 | -0.91 | 8.20E-01 |
| OVCH1      | -0.23 | 5.92E-01 | -0.12 | 5.50E-01 | -0.58 | 7.20E-01 |
| SENP1      | -0.23 | 5.92E-01 | 0.57  | 2.86E-01 | -1.87 | 9.69E-01 |
| VPS9D1     | -0.23 | 5.92E-01 | -0.72 | 7.63E-01 | 1.19  | 1.17E-01 |
| ZNF226     | -0.23 | 5.92E-01 | -0.09 | 5.36E-01 | -1.93 | 9.73E-01 |
| IL15RA     | -0.23 | 5.92E-01 | -1.37 | 9.14E-01 | -0.68 | 7.53E-01 |
| SET        | -0.23 | 5.92E-01 | 0.03  | 4.89E-01 | -1.69 | 9.54E-01 |
| BCAT1      | -0.23 | 5.92E-01 | 0.23  | 4.10E-01 | -1.27 | 8.97E-01 |
| ETFA       | -0.23 | 5.92E-01 | -0.22 | 5.86E-01 | -1.51 | 9.35E-01 |
| ADSSL1     | -0.23 | 5.92E-01 | 0.16  | 4.36E-01 | -0.48 | 6.85E-01 |
| IFNGR2     | -0.23 | 5.92E-01 | 0.43  | 3.35E-01 | -1.02 | 8.47E-01 |
| SPRR3      | -0.23 | 5.92E-01 | -0.18 | 5.73E-01 | -1.44 | 9.25E-01 |
| NAALAD2    | -0.23 | 5.92E-01 | -0.56 | 7.13E-01 | -0.35 | 6.38E-01 |
| DOCK10     | -0.23 | 5.92E-01 | 0.08  | 4.67E-01 | 0.05  | 4.80E-01 |
| CIDEC      | -0.23 | 5.92E-01 | -0.84 | 7.99E-01 | 0.05  | 4.80E-01 |
| JAGN1      | -0.23 | 5.92E-01 | 0.82  | 2.05E-01 | -0.02 | 5.09E-01 |
| C1D        | -0.23 | 5.92E-01 | -1.12 | 8.68E-01 | 0.06  | 4.76E-01 |

|           |       |          |       |          |       |          |
|-----------|-------|----------|-------|----------|-------|----------|
| CBR1      | -0.23 | 5.92E-01 | -1.00 | 8.43E-01 | 0.35  | 3.61E-01 |
| KRTAP19-4 | -0.23 | 5.92E-01 | -3.16 | 9.99E-01 | 0.65  | 2.58E-01 |
| TTC19     | -0.23 | 5.93E-01 | -1.72 | 9.58E-01 | 0.12  | 4.51E-01 |
| KRT37     | -0.23 | 5.93E-01 | -0.56 | 7.13E-01 | -1.34 | 9.10E-01 |
| GREB1     | -0.23 | 5.93E-01 | 0.63  | 2.65E-01 | -1.00 | 8.40E-01 |
| EIF4B     | -0.24 | 5.93E-01 | -0.34 | 6.34E-01 | 0.06  | 4.77E-01 |
| MAU2      | -0.24 | 5.93E-01 | -1.38 | 9.16E-01 | 0.04  | 4.85E-01 |
| SEC14L4   | -0.24 | 5.93E-01 | 0.29  | 3.86E-01 | -1.91 | 9.72E-01 |
| POLR2K    | -0.24 | 5.93E-01 | -0.56 | 7.12E-01 | 0.30  | 3.81E-01 |
| UGT1A4    | -0.24 | 5.93E-01 | -0.06 | 5.22E-01 | -0.02 | 5.09E-01 |
| POMK      | -0.24 | 5.93E-01 | -1.17 | 8.79E-01 | 1.26  | 1.04E-01 |
| HRASLS    | -0.24 | 5.94E-01 | 0.35  | 3.64E-01 | -0.60 | 7.25E-01 |
| NLRC5     | -0.24 | 5.94E-01 | -0.24 | 5.96E-01 | -0.73 | 7.67E-01 |
| HDAC3     | -0.24 | 5.94E-01 | -0.10 | 5.40E-01 | -0.74 | 7.70E-01 |
| UBE2E1    | -0.24 | 5.94E-01 | 0.53  | 2.99E-01 | -0.61 | 7.29E-01 |
| KRBA1     | -0.24 | 5.94E-01 | -0.61 | 7.29E-01 | -0.39 | 6.53E-01 |
| KRTAP10-1 | -0.24 | 5.94E-01 | -0.25 | 5.98E-01 | -1.07 | 8.59E-01 |
| XPO1      | -0.24 | 5.94E-01 | -0.65 | 7.43E-01 | 0.10  | 4.61E-01 |
| SLC51A    | -0.24 | 5.94E-01 | -1.11 | 8.67E-01 | 0.74  | 2.30E-01 |
| RPL19     | -0.24 | 5.94E-01 | 0.98  | 1.64E-01 | 0.92  | 1.78E-01 |
| UNC5B     | -0.24 | 5.94E-01 | 1.01  | 1.57E-01 | 0.47  | 3.19E-01 |
| FOXRED1   | -0.24 | 5.94E-01 | -0.29 | 6.15E-01 | -0.26 | 6.01E-01 |
| TRPT1     | -0.24 | 5.94E-01 | 0.75  | 2.27E-01 | 1.11  | 1.34E-01 |
| CEACAM8   | -0.24 | 5.94E-01 | -0.77 | 7.81E-01 | 0.45  | 3.27E-01 |
| IL18RAP   | -0.24 | 5.94E-01 | 0.07  | 4.71E-01 | -1.80 | 9.64E-01 |
| GRAMD1A   | -0.24 | 5.94E-01 | -0.78 | 7.82E-01 | -0.49 | 6.89E-01 |
| CILP2     | -0.24 | 5.94E-01 | -0.90 | 8.15E-01 | -0.55 | 7.10E-01 |
| GOLT1A    | -0.24 | 5.94E-01 | 1.07  | 1.42E-01 | -0.94 | 8.27E-01 |
| NLRP10    | -0.24 | 5.94E-01 | 0.66  | 2.54E-01 | -0.72 | 7.65E-01 |
| COG3      | -0.24 | 5.94E-01 | 0.33  | 3.70E-01 | -1.16 | 8.77E-01 |
| SEMA7A    | -0.24 | 5.94E-01 | -0.96 | 8.31E-01 | -0.48 | 6.85E-01 |

|          |       |          |       |          |       |          |
|----------|-------|----------|-------|----------|-------|----------|
| TUBA8    | -0.24 | 5.94E-01 | -1.01 | 8.43E-01 | 0.17  | 4.34E-01 |
| SLC35B3  | -0.24 | 5.94E-01 | -0.83 | 7.97E-01 | -0.04 | 5.15E-01 |
| KIAA0922 | -0.24 | 5.94E-01 | -0.28 | 6.12E-01 | -1.38 | 9.16E-01 |
| OR10K1   | -0.24 | 5.94E-01 | -0.95 | 8.28E-01 | -0.20 | 5.80E-01 |
| RNF13    | -0.24 | 5.94E-01 | 0.46  | 3.22E-01 | 1.21  | 1.13E-01 |
| CCDC150  | -0.24 | 5.94E-01 | 0.88  | 1.89E-01 | -1.00 | 8.42E-01 |
| EPHA2    | -0.24 | 5.94E-01 | 0.59  | 2.77E-01 | -0.13 | 5.52E-01 |
| COX14    | -0.24 | 5.94E-01 | -1.20 | 8.86E-01 | 1.21  | 1.12E-01 |
| IPO4     | -0.24 | 5.94E-01 | -0.62 | 7.32E-01 | -0.81 | 7.91E-01 |
| FAM3B    | -0.24 | 5.94E-01 | -0.61 | 7.31E-01 | -0.69 | 7.54E-01 |
| C4orf46  | -0.24 | 5.94E-01 | -1.33 | 9.08E-01 | -0.29 | 6.12E-01 |
| BMP8A    | -0.24 | 5.94E-01 | 0.59  | 2.78E-01 | -1.03 | 8.48E-01 |
| PLEKHB1  | -0.24 | 5.94E-01 | -0.76 | 7.75E-01 | 0.22  | 4.12E-01 |
| RPL4     | -0.24 | 5.94E-01 | -0.07 | 5.28E-01 | 0.17  | 4.31E-01 |
| C8orf12  | -0.24 | 5.94E-01 | 0.05  | 4.81E-01 | -0.17 | 5.68E-01 |
| SREBF2   | -0.24 | 5.94E-01 | 0.63  | 2.65E-01 | 0.75  | 2.28E-01 |
| MAP4     | -0.24 | 5.95E-01 | 0.93  | 1.77E-01 | 0.80  | 2.12E-01 |
| GAS2L2   | -0.24 | 5.95E-01 | 0.31  | 3.79E-01 | -0.37 | 6.43E-01 |
| GABBR2   | -0.24 | 5.95E-01 | 0.68  | 2.49E-01 | -0.86 | 8.05E-01 |
| MYOG     | -0.24 | 5.95E-01 | 0.26  | 3.98E-01 | 1.89  | 2.91E-02 |
| VPS53    | -0.24 | 5.95E-01 | -0.76 | 7.75E-01 | 0.29  | 3.86E-01 |
| SCUBE1   | -0.24 | 5.95E-01 | -0.67 | 7.48E-01 | -0.54 | 7.05E-01 |
| B3GNT2   | -0.24 | 5.95E-01 | -0.50 | 6.93E-01 | -0.96 | 8.31E-01 |
| NIPAL4   | -0.24 | 5.95E-01 | 0.30  | 3.81E-01 | 0.03  | 4.86E-01 |
| COX4I1   | -0.24 | 5.95E-01 | -0.04 | 5.18E-01 | 0.57  | 2.86E-01 |
| KRTCAP2  | -0.24 | 5.95E-01 | -1.38 | 9.17E-01 | -0.05 | 5.19E-01 |
| NIP7     | -0.24 | 5.95E-01 | 0.10  | 4.59E-01 | 2.08  | 1.89E-02 |
| GOLGA1   | -0.24 | 5.95E-01 | -0.75 | 7.75E-01 | -0.10 | 5.40E-01 |
| OR4E2    | -0.24 | 5.95E-01 | -0.34 | 6.33E-01 | -0.73 | 7.66E-01 |
| NDUFAB1  | -0.24 | 5.95E-01 | -0.99 | 8.38E-01 | 0.64  | 2.61E-01 |
| KLKB1    | -0.24 | 5.95E-01 | -1.10 | 8.64E-01 | 0.08  | 4.67E-01 |

|               |       |          |       |          |       |          |
|---------------|-------|----------|-------|----------|-------|----------|
| ZNF354C       | -0.24 | 5.95E-01 | 0.52  | 3.02E-01 | -0.26 | 6.03E-01 |
| OSGEPL1       | -0.24 | 5.95E-01 | 0.29  | 3.86E-01 | 0.03  | 4.88E-01 |
| ACE           | -0.24 | 5.95E-01 | -0.02 | 5.07E-01 | 2.29  | 1.09E-02 |
| NDRG4         | -0.24 | 5.95E-01 | -0.11 | 5.44E-01 | 0.89  | 1.88E-01 |
| IL22          | -0.24 | 5.95E-01 | -0.43 | 6.65E-01 | -1.85 | 9.68E-01 |
| FAM149A       | -0.24 | 5.96E-01 | -0.75 | 7.73E-01 | -0.15 | 5.60E-01 |
| HIST1H3A      | -0.24 | 5.96E-01 | -0.83 | 7.96E-01 | -0.18 | 5.72E-01 |
| CCDC79        | -0.24 | 5.96E-01 | -0.76 | 7.78E-01 | 0.77  | 2.22E-01 |
| ZNF644        | -0.24 | 5.96E-01 | -1.79 | 9.63E-01 | 0.09  | 4.63E-01 |
| NFASC         | -0.24 | 5.96E-01 | 0.00  | 4.99E-01 | -0.61 | 7.27E-01 |
| MESP1         | -0.24 | 5.96E-01 | -0.13 | 5.52E-01 | -0.33 | 6.28E-01 |
| C15orf57      | -0.24 | 5.96E-01 | 0.62  | 2.67E-01 | -0.35 | 6.39E-01 |
| NOTO          | -0.24 | 5.96E-01 | 0.09  | 4.63E-01 | -0.15 | 5.60E-01 |
| PDE8A         | -0.24 | 5.96E-01 | -0.37 | 6.45E-01 | 2.09  | 1.85E-02 |
| DYNLL2        | -0.24 | 5.96E-01 | -1.91 | 9.72E-01 | 0.95  | 1.71E-01 |
| COQ9          | -0.24 | 5.96E-01 | -0.93 | 8.24E-01 | -0.17 | 5.69E-01 |
| COL4A2        | -0.24 | 5.96E-01 | -0.95 | 8.29E-01 | 0.00  | 5.01E-01 |
| STAC3         | -0.24 | 5.96E-01 | -1.33 | 9.09E-01 | 0.23  | 4.09E-01 |
| ZNF362        | -0.24 | 5.96E-01 | -0.15 | 5.61E-01 | -0.90 | 8.17E-01 |
| FGF12         | -0.24 | 5.96E-01 | 1.33  | 9.20E-02 | -1.98 | 9.76E-01 |
| NCOA4         | -0.24 | 5.96E-01 | 0.46  | 3.22E-01 | -0.32 | 6.25E-01 |
| AMPD3         | -0.24 | 5.96E-01 | 0.33  | 3.69E-01 | 0.79  | 2.13E-01 |
| S100A12       | -0.24 | 5.97E-01 | -0.86 | 8.05E-01 | 0.56  | 2.88E-01 |
| UBE2M         | -0.24 | 5.97E-01 | -1.52 | 9.36E-01 | -0.01 | 5.05E-01 |
| SGK2          | -0.24 | 5.97E-01 | -0.36 | 6.39E-01 | -0.93 | 8.23E-01 |
| RP11-520P18.5 | -0.24 | 5.97E-01 | 0.19  | 4.23E-01 | -1.32 | 9.07E-01 |
| DYDC2         | -0.24 | 5.97E-01 | -0.06 | 5.24E-01 | -0.68 | 7.53E-01 |
| EFCAB8        | -0.25 | 5.97E-01 | -0.32 | 6.25E-01 | 0.16  | 4.36E-01 |
| CHMP7         | -0.25 | 5.97E-01 | -1.43 | 9.24E-01 | 0.92  | 1.80E-01 |
| CDA           | -0.25 | 5.97E-01 | -0.85 | 8.03E-01 | -0.51 | 6.93E-01 |
| HEY2          | -0.25 | 5.97E-01 | -1.05 | 8.54E-01 | 1.05  | 1.46E-01 |

|            |       |          |       |          |       |          |
|------------|-------|----------|-------|----------|-------|----------|
| NDUFS5     | -0.25 | 5.97E-01 | 0.24  | 4.06E-01 | -0.82 | 7.95E-01 |
| GLB1L2     | -0.25 | 5.97E-01 | -0.23 | 5.89E-01 | -0.84 | 7.99E-01 |
| CNR1       | -0.25 | 5.97E-01 | -1.39 | 9.18E-01 | 0.86  | 1.95E-01 |
| AC104809.3 | -0.25 | 5.97E-01 | 0.03  | 4.89E-01 | 1.34  | 9.01E-02 |
| MRPL39     | -0.25 | 5.97E-01 | 0.64  | 2.61E-01 | -0.55 | 7.10E-01 |
| PHF14      | -0.25 | 5.97E-01 | -0.32 | 6.27E-01 | 0.00  | 4.99E-01 |
| TMEM129    | -0.25 | 5.97E-01 | 0.29  | 3.88E-01 | -1.79 | 9.63E-01 |
| PPIF       | -0.25 | 5.98E-01 | 0.02  | 4.91E-01 | -0.55 | 7.07E-01 |
| EFR3B      | -0.25 | 5.98E-01 | 0.21  | 4.19E-01 | -0.35 | 6.35E-01 |
| KCNJ14     | -0.25 | 5.98E-01 | -1.83 | 9.66E-01 | 0.19  | 4.25E-01 |
| CTSE       | -0.25 | 5.98E-01 | -0.38 | 6.48E-01 | -1.16 | 8.77E-01 |
| POU2AF1    | -0.25 | 5.98E-01 | -0.73 | 7.67E-01 | -0.42 | 6.62E-01 |
| EIF3F      | -0.25 | 5.98E-01 | 1.59  | 5.58E-02 | -2.29 | 9.89E-01 |
| CAMLG      | -0.25 | 5.98E-01 | -0.28 | 6.12E-01 | 1.02  | 1.54E-01 |
| ORC2       | -0.25 | 5.98E-01 | -0.06 | 5.24E-01 | -1.02 | 8.47E-01 |
| PRSS23     | -0.25 | 5.98E-01 | -0.03 | 5.13E-01 | -0.83 | 7.97E-01 |
| MAPK14     | -0.25 | 5.98E-01 | -1.40 | 9.19E-01 | 0.13  | 4.47E-01 |
| TOP3B      | -0.25 | 5.98E-01 | 0.30  | 3.82E-01 | 1.20  | 1.15E-01 |
| TNFSF13    | -0.25 | 5.98E-01 | -0.88 | 8.09E-01 | -0.21 | 5.84E-01 |
| TRHDE      | -0.25 | 5.98E-01 | 0.84  | 2.00E-01 | 0.00  | 5.00E-01 |
| HMBOX1     | -0.25 | 5.98E-01 | 0.04  | 4.85E-01 | 0.05  | 4.81E-01 |
| RB1CC1     | -0.25 | 5.98E-01 | -0.71 | 7.61E-01 | -0.74 | 7.69E-01 |
| DERL2      | -0.25 | 5.99E-01 | -0.88 | 8.11E-01 | 1.10  | 1.36E-01 |
| WISP1      | -0.25 | 5.99E-01 | -0.39 | 6.51E-01 | -0.24 | 5.95E-01 |
| C22orf43   | -0.25 | 5.99E-01 | -0.90 | 8.16E-01 | 0.69  | 2.46E-01 |
| DGKG       | -0.25 | 5.99E-01 | -1.08 | 8.59E-01 | 0.77  | 2.21E-01 |
| PI4K2B     | -0.25 | 5.99E-01 | 0.56  | 2.89E-01 | -1.89 | 9.71E-01 |
| C15orf65   | -0.25 | 5.99E-01 | -0.01 | 5.04E-01 | -0.21 | 5.83E-01 |
| PFKFB3     | -0.25 | 5.99E-01 | -0.39 | 6.53E-01 | -1.61 | 9.46E-01 |
| JPH3       | -0.25 | 5.99E-01 | -0.20 | 5.80E-01 | 0.37  | 3.57E-01 |
| SLC16A5    | -0.25 | 5.99E-01 | -0.60 | 7.24E-01 | 0.19  | 4.23E-01 |

|          |       |          |       |          |       |          |
|----------|-------|----------|-------|----------|-------|----------|
| SEC16B   | -0.25 | 5.99E-01 | -1.37 | 9.15E-01 | 1.58  | 5.69E-02 |
| HID1     | -0.25 | 5.99E-01 | -0.11 | 5.45E-01 | 0.51  | 3.06E-01 |
| BPIFB3   | -0.25 | 5.99E-01 | -0.54 | 7.05E-01 | -0.52 | 6.99E-01 |
| KRT7     | -0.25 | 5.99E-01 | -0.70 | 7.57E-01 | -0.41 | 6.60E-01 |
| MTL5     | -0.25 | 5.99E-01 | 0.49  | 3.11E-01 | -0.55 | 7.08E-01 |
| ATP1B1   | -0.25 | 5.99E-01 | 0.36  | 3.59E-01 | 0.61  | 2.72E-01 |
| WIF1     | -0.25 | 5.99E-01 | 0.57  | 2.84E-01 | 0.52  | 3.02E-01 |
| OS9      | -0.25 | 6.00E-01 | -1.46 | 9.28E-01 | 0.41  | 3.41E-01 |
| MEOX1    | -0.25 | 6.00E-01 | 1.82  | 3.48E-02 | 0.58  | 2.81E-01 |
| CPT2     | -0.25 | 6.00E-01 | 1.32  | 9.38E-02 | 0.33  | 3.71E-01 |
| UNC93A   | -0.25 | 6.00E-01 | -1.27 | 8.99E-01 | -0.21 | 5.84E-01 |
| ASCC1    | -0.25 | 6.00E-01 | 0.56  | 2.88E-01 | -0.08 | 5.32E-01 |
| SOWAHA   | -0.25 | 6.00E-01 | -0.66 | 7.46E-01 | -0.08 | 5.32E-01 |
| MFRP     | -0.25 | 6.00E-01 | 0.30  | 3.82E-01 | -0.80 | 7.89E-01 |
| MFRP     | -0.25 | 6.00E-01 | 0.30  | 3.82E-01 | -0.80 | 7.89E-01 |
| C1QTNF5  | -0.25 | 6.00E-01 | 0.30  | 3.82E-01 | -0.80 | 7.89E-01 |
| ASH1L    | -0.25 | 6.00E-01 | -0.29 | 6.15E-01 | -0.31 | 6.23E-01 |
| SYMPK    | -0.25 | 6.00E-01 | 0.08  | 4.69E-01 | -0.94 | 8.26E-01 |
| FRAS1    | -0.25 | 6.00E-01 | 1.08  | 1.40E-01 | -0.28 | 6.11E-01 |
| ACTR5    | -0.25 | 6.00E-01 | 0.45  | 3.27E-01 | 2.20  | 1.39E-02 |
| EXOC3L2  | -0.25 | 6.00E-01 | -0.15 | 5.58E-01 | -0.39 | 6.52E-01 |
| OR6J1    | -0.25 | 6.00E-01 | 0.18  | 4.28E-01 | 0.33  | 3.72E-01 |
| OR52E8   | -0.25 | 6.00E-01 | -0.31 | 6.23E-01 | -1.01 | 8.44E-01 |
| KLHL24   | -0.25 | 6.00E-01 | -0.26 | 6.04E-01 | -0.77 | 7.80E-01 |
| OLIG1    | -0.25 | 6.00E-01 | 0.98  | 1.63E-01 | 0.37  | 3.57E-01 |
| HIST1H1T | -0.25 | 6.00E-01 | -0.67 | 7.49E-01 | -0.95 | 8.29E-01 |
| SYTL3    | -0.25 | 6.00E-01 | 0.48  | 3.15E-01 | 1.57  | 5.83E-02 |
| CRYGB    | -0.25 | 6.00E-01 | -0.98 | 8.36E-01 | 0.61  | 2.71E-01 |
| PLEKHA4  | -0.25 | 6.01E-01 | 0.39  | 3.48E-01 | -1.12 | 8.69E-01 |
| NFKBID   | -0.26 | 6.01E-01 | -0.52 | 6.97E-01 | 0.17  | 4.31E-01 |
| NMT1     | -0.26 | 6.01E-01 | -1.16 | 8.77E-01 | 0.45  | 3.27E-01 |

|           |       |          |       |          |       |          |
|-----------|-------|----------|-------|----------|-------|----------|
| OR56B1    | -0.26 | 6.01E-01 | 0.69  | 2.45E-01 | 1.18  | 1.20E-01 |
| PTHLH     | -0.26 | 6.01E-01 | -0.76 | 7.75E-01 | -0.09 | 5.34E-01 |
| FAIM2     | -0.26 | 6.01E-01 | -0.90 | 8.15E-01 | 0.37  | 3.54E-01 |
| MYO5A     | -0.26 | 6.01E-01 | -0.60 | 7.25E-01 | -0.58 | 7.18E-01 |
| ACP1      | -0.26 | 6.01E-01 | -0.49 | 6.89E-01 | -0.21 | 5.82E-01 |
| SYCP2     | -0.26 | 6.01E-01 | 1.11  | 1.35E-01 | 0.05  | 4.79E-01 |
| NMRK1     | -0.26 | 6.01E-01 | 1.86  | 3.14E-02 | 2.46  | 7.00E-03 |
| CCL13     | -0.26 | 6.01E-01 | -0.73 | 7.67E-01 | -0.27 | 6.07E-01 |
| TMEM184B  | -0.26 | 6.01E-01 | -0.69 | 7.53E-01 | -0.38 | 6.46E-01 |
| SSU72     | -0.26 | 6.01E-01 | -0.06 | 5.24E-01 | -0.94 | 8.25E-01 |
| AGXT2     | -0.26 | 6.01E-01 | -0.07 | 5.27E-01 | -0.36 | 6.40E-01 |
| COX6A2    | -0.26 | 6.01E-01 | -2.19 | 9.86E-01 | 0.22  | 4.13E-01 |
| LINC00935 | -0.26 | 6.01E-01 | 0.62  | 2.69E-01 | 0.48  | 3.17E-01 |
| CENPO     | -0.26 | 6.01E-01 | 1.91  | 2.82E-02 | 0.29  | 3.87E-01 |
| PTPN7     | -0.26 | 6.01E-01 | -0.89 | 8.12E-01 | 0.96  | 1.67E-01 |
| TMEM67    | -0.26 | 6.01E-01 | -0.59 | 7.24E-01 | -0.53 | 7.01E-01 |
| KIAA0355  | -0.26 | 6.01E-01 | 0.82  | 2.07E-01 | -0.54 | 7.05E-01 |
| DIRAS2    | -0.26 | 6.02E-01 | 0.15  | 4.42E-01 | 0.03  | 4.90E-01 |
| SPSB4     | -0.26 | 6.02E-01 | 0.67  | 2.50E-01 | 0.15  | 4.41E-01 |
| COL2A1    | -0.26 | 6.02E-01 | 0.26  | 3.98E-01 | -0.97 | 8.33E-01 |
| MBIP      | -0.26 | 6.02E-01 | -0.30 | 6.19E-01 | 0.10  | 4.60E-01 |
| TDRD1     | -0.26 | 6.02E-01 | 0.10  | 4.59E-01 | -0.09 | 5.36E-01 |
| SLC35B4   | -0.26 | 6.02E-01 | 0.31  | 3.80E-01 | -1.41 | 9.20E-01 |
| PDPK1     | -0.26 | 6.02E-01 | 0.79  | 2.15E-01 | -0.49 | 6.88E-01 |
| BZW2      | -0.26 | 6.02E-01 | -0.81 | 7.91E-01 | -0.63 | 7.35E-01 |
| EBPL      | -0.26 | 6.02E-01 | 0.11  | 4.55E-01 | 1.19  | 1.17E-01 |
| KCNK6     | -0.26 | 6.02E-01 | 0.19  | 4.25E-01 | -0.26 | 6.01E-01 |
| ADAM19    | -0.26 | 6.02E-01 | 0.96  | 1.69E-01 | -1.02 | 8.45E-01 |
| RNF214    | -0.26 | 6.02E-01 | 1.08  | 1.41E-01 | 0.73  | 2.32E-01 |
| PCDH18    | -0.26 | 6.02E-01 | -0.26 | 6.03E-01 | -0.29 | 6.12E-01 |
| SOX13     | -0.26 | 6.02E-01 | -0.81 | 7.92E-01 | 0.24  | 4.04E-01 |



|          |       |          |       |          |       |          |
|----------|-------|----------|-------|----------|-------|----------|
| PPM1H    | -0.26 | 6.02E-01 | 1.35  | 8.84E-02 | 0.39  | 3.49E-01 |
| LCTL     | -0.26 | 6.02E-01 | -0.64 | 7.38E-01 | 0.05  | 4.82E-01 |
| ZIM3     | -0.26 | 6.02E-01 | -0.48 | 6.84E-01 | -1.02 | 8.47E-01 |
| MYO3B    | -0.26 | 6.02E-01 | 0.02  | 4.93E-01 | 0.11  | 4.57E-01 |
| SIRPA    | -0.26 | 6.02E-01 | -1.82 | 9.65E-01 | 0.16  | 4.35E-01 |
| FSCN1    | -0.26 | 6.02E-01 | 0.48  | 3.16E-01 | 0.02  | 4.93E-01 |
| KCNQ5    | -0.26 | 6.03E-01 | 0.21  | 4.19E-01 | -0.67 | 7.48E-01 |
| SOGA1    | -0.26 | 6.03E-01 | 0.28  | 3.91E-01 | 1.21  | 1.13E-01 |
| TCP11    | -0.26 | 6.03E-01 | -0.25 | 5.98E-01 | -0.24 | 5.96E-01 |
| MRPL21   | -0.26 | 6.03E-01 | 0.29  | 3.85E-01 | -1.01 | 8.43E-01 |
| SCGB2A2  | -0.26 | 6.03E-01 | -0.13 | 5.52E-01 | 0.27  | 3.92E-01 |
| CARKD    | -0.26 | 6.03E-01 | -1.17 | 8.79E-01 | 1.01  | 1.57E-01 |
| DGKB     | -0.26 | 6.03E-01 | 1.05  | 1.46E-01 | -0.74 | 7.71E-01 |
| C1orf87  | -0.26 | 6.03E-01 | -1.32 | 9.06E-01 | -0.42 | 6.62E-01 |
| RIPPLY3  | -0.26 | 6.03E-01 | 0.22  | 4.13E-01 | -0.41 | 6.59E-01 |
| ZNF254   | -0.26 | 6.03E-01 | -0.17 | 5.67E-01 | -0.74 | 7.70E-01 |
| FAM83C   | -0.26 | 6.03E-01 | -0.67 | 7.49E-01 | -0.28 | 6.09E-01 |
| KRT1     | -0.26 | 6.03E-01 | 0.83  | 2.03E-01 | 0.16  | 4.38E-01 |
| WNT2     | -0.26 | 6.03E-01 | 0.49  | 3.13E-01 | -0.83 | 7.96E-01 |
| VAMP5    | -0.26 | 6.03E-01 | -0.07 | 5.26E-01 | 0.04  | 4.85E-01 |
| KAT2A    | -0.26 | 6.03E-01 | 0.37  | 3.55E-01 | -0.46 | 6.78E-01 |
| RCN1     | -0.26 | 6.03E-01 | -0.85 | 8.02E-01 | -0.08 | 5.30E-01 |
| HEATR2   | -0.26 | 6.03E-01 | -0.52 | 7.00E-01 | 0.26  | 3.98E-01 |
| KIF3A    | -0.26 | 6.03E-01 | 1.98  | 2.38E-02 | 1.17  | 1.21E-01 |
| SYCP2L   | -0.26 | 6.03E-01 | 0.28  | 3.89E-01 | 0.96  | 1.70E-01 |
| DNAJB7   | -0.26 | 6.03E-01 | -1.04 | 8.52E-01 | 0.36  | 3.61E-01 |
| EFNA3    | -0.26 | 6.04E-01 | 0.30  | 3.81E-01 | -1.09 | 8.63E-01 |
| GRAMD4   | -0.26 | 6.04E-01 | -0.39 | 6.50E-01 | -0.60 | 7.25E-01 |
| HOXD12   | -0.26 | 6.04E-01 | -0.34 | 6.32E-01 | -0.33 | 6.28E-01 |
| SLC41A1  | -0.26 | 6.04E-01 | -0.34 | 6.34E-01 | -0.95 | 8.30E-01 |
| ATP6V0A1 | -0.26 | 6.04E-01 | -1.15 | 8.75E-01 | -0.56 | 7.14E-01 |

|         |       |          |       |          |       |          |
|---------|-------|----------|-------|----------|-------|----------|
| F11R    | -0.26 | 6.04E-01 | -0.22 | 5.89E-01 | 2.05  | 2.00E-02 |
| IL12RB1 | -0.26 | 6.04E-01 | -1.62 | 9.47E-01 | 0.69  | 2.46E-01 |
| CPNE2   | -0.26 | 6.04E-01 | -0.80 | 7.90E-01 | -0.06 | 5.25E-01 |
| DCUN1D4 | -0.26 | 6.04E-01 | 0.44  | 3.30E-01 | -0.49 | 6.88E-01 |
| GPR17   | -0.26 | 6.04E-01 | -0.29 | 6.14E-01 | 1.18  | 1.19E-01 |
| HDGF    | -0.26 | 6.04E-01 | 0.06  | 4.75E-01 | 0.12  | 4.54E-01 |
| ST8SIA3 | -0.26 | 6.04E-01 | -0.62 | 7.32E-01 | -0.40 | 6.54E-01 |
| CYP3A43 | -0.27 | 6.05E-01 | -0.96 | 8.31E-01 | -0.42 | 6.63E-01 |
| PRAP1   | -0.27 | 6.05E-01 | -1.50 | 9.34E-01 | 0.99  | 1.61E-01 |
| HEG1    | -0.27 | 6.05E-01 | -0.50 | 6.91E-01 | 0.54  | 2.96E-01 |
| SLC13A5 | -0.27 | 6.05E-01 | 0.39  | 3.49E-01 | -0.93 | 8.24E-01 |
| LAX1    | -0.27 | 6.05E-01 | -0.40 | 6.55E-01 | 0.02  | 4.92E-01 |
| CCDC107 | -0.27 | 6.05E-01 | -0.42 | 6.62E-01 | 0.70  | 2.42E-01 |
| RBM15   | -0.27 | 6.05E-01 | -0.05 | 5.21E-01 | -1.67 | 9.52E-01 |
| E2F1    | -0.27 | 6.05E-01 | 0.08  | 4.68E-01 | -1.55 | 9.39E-01 |
| QPRT    | -0.27 | 6.05E-01 | -1.38 | 9.16E-01 | 0.32  | 3.73E-01 |
| CREBRF  | -0.27 | 6.05E-01 | 0.59  | 2.77E-01 | -0.01 | 5.04E-01 |
| CASR    | -0.27 | 6.05E-01 | 0.72  | 2.37E-01 | -0.87 | 8.09E-01 |
| TEX37   | -0.27 | 6.05E-01 | -0.28 | 6.11E-01 | -0.25 | 6.00E-01 |
| HNRNPA1 | -0.27 | 6.05E-01 | 0.49  | 3.11E-01 | 0.26  | 3.97E-01 |
| BIN1    | -0.27 | 6.05E-01 | -0.11 | 5.43E-01 | -1.72 | 9.57E-01 |
| PLEKHB2 | -0.27 | 6.05E-01 | -0.78 | 7.81E-01 | -0.32 | 6.26E-01 |
| SPRYD4  | -0.27 | 6.06E-01 | 0.57  | 2.84E-01 | -0.87 | 8.08E-01 |
| LGALS12 | -0.27 | 6.06E-01 | -0.78 | 7.81E-01 | -0.57 | 7.15E-01 |
| RETSAT  | -0.27 | 6.06E-01 | -0.48 | 6.84E-01 | -0.01 | 5.05E-01 |
| SLC7A6  | -0.27 | 6.06E-01 | -0.40 | 6.57E-01 | 1.39  | 8.30E-02 |
| FN1     | -0.27 | 6.06E-01 | -0.96 | 8.31E-01 | 0.72  | 2.35E-01 |
| FAM81B  | -0.27 | 6.06E-01 | 0.04  | 4.84E-01 | -0.61 | 7.29E-01 |
| RTN4RL1 | -0.27 | 6.06E-01 | -0.95 | 8.28E-01 | -0.56 | 7.13E-01 |
| ZNF7    | -0.27 | 6.06E-01 | -0.12 | 5.47E-01 | -1.62 | 9.47E-01 |
| RNF168  | -0.27 | 6.06E-01 | 0.52  | 3.01E-01 | -0.38 | 6.49E-01 |

|           |       |          |       |          |       |          |
|-----------|-------|----------|-------|----------|-------|----------|
| USP41     | -0.27 | 6.06E-01 | -0.32 | 6.24E-01 | -1.13 | 8.70E-01 |
| MYOM2     | -0.27 | 6.06E-01 | -1.27 | 8.99E-01 | 0.92  | 1.78E-01 |
| NUDCD2    | -0.27 | 6.06E-01 | -0.26 | 6.02E-01 | -0.49 | 6.87E-01 |
| DGKQ      | -0.27 | 6.06E-01 | 0.08  | 4.68E-01 | 1.53  | 6.32E-02 |
| EIF3L     | -0.27 | 6.06E-01 | -0.46 | 6.77E-01 | -0.72 | 7.64E-01 |
| TRIB3     | -0.27 | 6.06E-01 | -0.65 | 7.44E-01 | 0.50  | 3.08E-01 |
| GCAT      | -0.27 | 6.06E-01 | -0.28 | 6.08E-01 | -1.42 | 9.22E-01 |
| LNX2      | -0.27 | 6.07E-01 | 0.25  | 4.03E-01 | -1.95 | 9.74E-01 |
| LCE3D     | -0.27 | 6.07E-01 | -0.72 | 7.66E-01 | -0.61 | 7.30E-01 |
| CBS       | -0.27 | 6.07E-01 | 0.13  | 4.47E-01 | -1.34 | 9.09E-01 |
| OPRK1     | -0.27 | 6.07E-01 | 0.79  | 2.14E-01 | -0.83 | 7.97E-01 |
| INTS6     | -0.27 | 6.07E-01 | 0.36  | 3.59E-01 | -0.90 | 8.15E-01 |
| FASLG     | -0.27 | 6.07E-01 | -0.92 | 8.21E-01 | 0.37  | 3.58E-01 |
| SPATA5L1  | -0.27 | 6.07E-01 | 0.04  | 4.85E-01 | -1.37 | 9.15E-01 |
| PDXK      | -0.27 | 6.07E-01 | -0.48 | 6.83E-01 | -0.73 | 7.67E-01 |
| GPR83     | -0.27 | 6.07E-01 | 0.13  | 4.47E-01 | -1.69 | 9.54E-01 |
| LRRC16B   | -0.27 | 6.07E-01 | -0.78 | 7.83E-01 | 0.06  | 4.78E-01 |
| NRSN1     | -0.27 | 6.07E-01 | -0.62 | 7.31E-01 | 0.16  | 4.35E-01 |
| CTTNBP2NL | -0.27 | 6.07E-01 | 0.43  | 3.35E-01 | -0.62 | 7.33E-01 |
| KBTBD4    | -0.27 | 6.07E-01 | 1.25  | 1.06E-01 | 0.02  | 4.93E-01 |
| FDPS      | -0.27 | 6.07E-01 | -0.20 | 5.78E-01 | -0.89 | 8.12E-01 |
| NOV       | -0.27 | 6.07E-01 | 0.11  | 4.57E-01 | -1.13 | 8.70E-01 |
| RRM1      | -0.27 | 6.07E-01 | -0.11 | 5.44E-01 | -1.00 | 8.41E-01 |
| GSTO1     | -0.27 | 6.07E-01 | 0.04  | 4.84E-01 | 0.59  | 2.78E-01 |
| RNF181    | -0.27 | 6.08E-01 | 0.29  | 3.87E-01 | -0.41 | 6.57E-01 |
| ADAM22    | -0.27 | 6.08E-01 | -0.07 | 5.27E-01 | -0.39 | 6.51E-01 |
| ZNF627    | -0.27 | 6.08E-01 | 0.41  | 3.43E-01 | -0.36 | 6.39E-01 |
| ACE       | -0.27 | 6.08E-01 | -0.14 | 5.56E-01 | 2.28  | 1.12E-02 |
| TMEM221   | -0.27 | 6.08E-01 | 0.26  | 3.98E-01 | 0.44  | 3.31E-01 |
| ARHGEF17  | -0.27 | 6.08E-01 | -1.42 | 9.22E-01 | 0.35  | 3.63E-01 |
| USHBP1    | -0.27 | 6.08E-01 | 0.14  | 4.46E-01 | -0.09 | 5.38E-01 |

|          |       |          |       |          |       |          |
|----------|-------|----------|-------|----------|-------|----------|
| SCFD2    | -0.27 | 6.08E-01 | -0.55 | 7.09E-01 | 0.26  | 3.98E-01 |
| ERMARD   | -0.27 | 6.08E-01 | -1.59 | 9.44E-01 | 0.52  | 3.02E-01 |
| BDP1     | -0.27 | 6.08E-01 | 0.10  | 4.59E-01 | -0.65 | 7.43E-01 |
| TAS2R4   | -0.27 | 6.08E-01 | -0.06 | 5.24E-01 | -0.83 | 7.95E-01 |
| GALNT2   | -0.27 | 6.08E-01 | -0.89 | 8.13E-01 | -0.70 | 7.58E-01 |
| TATDN2   | -0.27 | 6.08E-01 | -0.43 | 6.67E-01 | -0.74 | 7.71E-01 |
| ZNF343   | -0.28 | 6.08E-01 | 0.82  | 2.07E-01 | -0.55 | 7.09E-01 |
| GSTA4    | -0.28 | 6.09E-01 | -0.84 | 8.00E-01 | 0.32  | 3.74E-01 |
| AKR1A1   | -0.28 | 6.09E-01 | 0.81  | 2.09E-01 | -0.39 | 6.53E-01 |
| ARHGEF39 | -0.28 | 6.09E-01 | -0.92 | 8.21E-01 | 0.79  | 2.16E-01 |
| METAP1D  | -0.28 | 6.09E-01 | 0.82  | 2.05E-01 | -1.41 | 9.21E-01 |
| SETD3    | -0.28 | 6.09E-01 | 1.18  | 1.19E-01 | -0.04 | 5.18E-01 |
| PPP1R16A | -0.28 | 6.09E-01 | -0.08 | 5.32E-01 | -0.98 | 8.36E-01 |
| MPC2     | -0.28 | 6.09E-01 | -0.67 | 7.49E-01 | -0.20 | 5.80E-01 |
| KLF16    | -0.28 | 6.09E-01 | 0.29  | 3.85E-01 | -0.92 | 8.21E-01 |
| PRMT10   | -0.28 | 6.09E-01 | -0.55 | 7.08E-01 | -0.41 | 6.59E-01 |
| PHF19    | -0.28 | 6.09E-01 | 0.48  | 3.16E-01 | -0.15 | 5.59E-01 |
| METTL16  | -0.28 | 6.09E-01 | 0.84  | 2.00E-01 | -0.39 | 6.51E-01 |
| ST8SIA6  | -0.28 | 6.09E-01 | -0.62 | 7.34E-01 | 0.34  | 3.67E-01 |
| AAR2     | -0.28 | 6.09E-01 | -0.85 | 8.03E-01 | -0.63 | 7.37E-01 |
| TAGLN    | -0.28 | 6.09E-01 | -0.64 | 7.38E-01 | -1.14 | 8.74E-01 |
| MYBPH    | -0.28 | 6.09E-01 | -0.31 | 6.23E-01 | 0.33  | 3.72E-01 |
| NAP1L4   | -0.28 | 6.10E-01 | 0.76  | 2.22E-01 | 0.41  | 3.42E-01 |
| PCSK6    | -0.28 | 6.10E-01 | 0.42  | 3.37E-01 | 0.96  | 1.69E-01 |
| TMC4     | -0.28 | 6.10E-01 | -0.69 | 7.53E-01 | 0.66  | 2.55E-01 |
| RAB17    | -0.28 | 6.10E-01 | -0.87 | 8.08E-01 | 0.64  | 2.63E-01 |
| SLC6A19  | -0.28 | 6.10E-01 | -1.05 | 8.54E-01 | 0.06  | 4.75E-01 |
| CYP2C18  | -0.28 | 6.10E-01 | 1.27  | 1.01E-01 | 0.41  | 3.42E-01 |
| CLDN9    | -0.28 | 6.10E-01 | 0.16  | 4.35E-01 | -2.53 | 9.94E-01 |
| VSX2     | -0.28 | 6.10E-01 | -0.81 | 7.90E-01 | -0.46 | 6.78E-01 |
| UCK2     | -0.28 | 6.10E-01 | 0.23  | 4.10E-01 | 1.76  | 3.94E-02 |

|           |       |          |       |          |       |          |
|-----------|-------|----------|-------|----------|-------|----------|
| GSTA5     | -0.28 | 6.10E-01 | -1.22 | 8.89E-01 | -0.53 | 7.04E-01 |
| ACTR6     | -0.28 | 6.10E-01 | -0.46 | 6.76E-01 | 0.27  | 3.94E-01 |
| NOMO3     | -0.28 | 6.10E-01 | -0.47 | 6.82E-01 | 0.58  | 2.80E-01 |
| ENOSF1    | -0.28 | 6.10E-01 | 1.39  | 8.15E-02 | -0.38 | 6.49E-01 |
| ACSM2A    | -0.28 | 6.10E-01 | 0.48  | 3.16E-01 | -0.80 | 7.87E-01 |
| NR5A1     | -0.28 | 6.10E-01 | -0.04 | 5.17E-01 | -0.95 | 8.28E-01 |
| SETD9     | -0.28 | 6.10E-01 | 0.56  | 2.86E-01 | 0.12  | 4.53E-01 |
| PHKG2     | -0.28 | 6.10E-01 | 0.64  | 2.61E-01 | 0.76  | 2.23E-01 |
| ANKRD33   | -0.28 | 6.10E-01 | 0.50  | 3.10E-01 | -0.83 | 7.98E-01 |
| DPY19L3   | -0.28 | 6.10E-01 | 2.37  | 8.95E-03 | -0.08 | 5.32E-01 |
| PRKD3     | -0.28 | 6.10E-01 | -0.12 | 5.49E-01 | -0.11 | 5.43E-01 |
| C21orf90  | -0.28 | 6.10E-01 | 1.69  | 4.54E-02 | 0.90  | 1.85E-01 |
| BDH1      | -0.28 | 6.11E-01 | 0.14  | 4.46E-01 | -2.23 | 9.87E-01 |
| CCK       | -0.28 | 6.11E-01 | -0.41 | 6.60E-01 | 1.02  | 1.53E-01 |
| AMZ2      | -0.28 | 6.11E-01 | 0.16  | 4.37E-01 | -0.66 | 7.47E-01 |
| KRT222    | -0.28 | 6.11E-01 | -0.43 | 6.65E-01 | -0.12 | 5.49E-01 |
| ATP1B3    | -0.28 | 6.11E-01 | -1.19 | 8.83E-01 | 0.02  | 4.92E-01 |
| RBM33     | -0.28 | 6.11E-01 | -0.67 | 7.49E-01 | -1.05 | 8.53E-01 |
| GABARAPL1 | -0.28 | 6.11E-01 | 0.54  | 2.93E-01 | -1.71 | 9.57E-01 |
| LARS      | -0.28 | 6.11E-01 | 0.85  | 1.97E-01 | 0.24  | 4.04E-01 |
| HOMER1    | -0.28 | 6.11E-01 | -1.68 | 9.53E-01 | 0.33  | 3.71E-01 |
| CHST4     | -0.28 | 6.11E-01 | -0.71 | 7.61E-01 | 1.15  | 1.26E-01 |
| ZNF679    | -0.28 | 6.11E-01 | -0.04 | 5.15E-01 | 0.46  | 3.23E-01 |
| SYNGR1    | -0.28 | 6.11E-01 | 0.08  | 4.67E-01 | -0.98 | 8.36E-01 |
| DMGDH     | -0.28 | 6.11E-01 | -0.54 | 7.04E-01 | -0.07 | 5.28E-01 |
| PFKM      | -0.28 | 6.11E-01 | 0.24  | 4.07E-01 | -1.93 | 9.73E-01 |
| HCFC2     | -0.28 | 6.11E-01 | -0.90 | 8.17E-01 | -0.05 | 5.19E-01 |
| CASC10    | -0.28 | 6.11E-01 | -0.53 | 7.03E-01 | -0.92 | 8.20E-01 |
| HIST1H4I  | -0.28 | 6.11E-01 | 1.77  | 3.85E-02 | 1.05  | 1.46E-01 |
| OR56B4    | -0.28 | 6.11E-01 | -0.73 | 7.67E-01 | -0.02 | 5.09E-01 |
| YIPF3     | -0.28 | 6.12E-01 | -1.03 | 8.48E-01 | -0.56 | 7.13E-01 |

|         |       |          |       |          |       |          |
|---------|-------|----------|-------|----------|-------|----------|
| ALKBH4  | -0.28 | 6.12E-01 | 0.40  | 3.44E-01 | -0.90 | 8.17E-01 |
| MAP6    | -0.28 | 6.12E-01 | 0.00  | 4.99E-01 | -1.29 | 9.02E-01 |
| DPP10   | -0.28 | 6.12E-01 | 0.53  | 2.97E-01 | -0.28 | 6.10E-01 |
| CYHR1   | -0.28 | 6.12E-01 | -0.41 | 6.58E-01 | -1.02 | 8.46E-01 |
| HSD17B2 | -0.28 | 6.12E-01 | -0.49 | 6.89E-01 | -0.32 | 6.27E-01 |
| TICRR   | -0.28 | 6.12E-01 | 0.53  | 2.98E-01 | -1.50 | 9.33E-01 |
| CDC7    | -0.28 | 6.12E-01 | -1.22 | 8.89E-01 | -0.32 | 6.27E-01 |
| 43355   | -0.28 | 6.12E-01 | -0.38 | 6.47E-01 | -0.21 | 5.84E-01 |
| FXYD7   | -0.28 | 6.12E-01 | 0.83  | 2.05E-01 | 1.35  | 8.90E-02 |
| PRPF6   | -0.28 | 6.12E-01 | -1.24 | 8.92E-01 | 0.10  | 4.59E-01 |
| IKBKE   | -0.28 | 6.12E-01 | -1.45 | 9.27E-01 | -0.02 | 5.10E-01 |
| FAM47E  | -0.28 | 6.12E-01 | -0.17 | 5.66E-01 | -0.44 | 6.72E-01 |
| BET1    | -0.28 | 6.12E-01 | -0.20 | 5.79E-01 | -0.10 | 5.38E-01 |
| GMEB2   | -0.29 | 6.12E-01 | -0.37 | 6.45E-01 | -1.27 | 8.97E-01 |
| CHGA    | -0.29 | 6.12E-01 | -1.12 | 8.70E-01 | 0.72  | 2.37E-01 |
| OPLAH   | -0.29 | 6.12E-01 | -0.45 | 6.75E-01 | -0.66 | 7.44E-01 |
| TSC22D2 | -0.29 | 6.12E-01 | -0.57 | 7.14E-01 | 1.07  | 1.41E-01 |
| ATF6    | -0.29 | 6.12E-01 | -0.02 | 5.07E-01 | -0.51 | 6.94E-01 |
| CISD3   | -0.29 | 6.12E-01 | 0.24  | 4.04E-01 | 0.54  | 2.96E-01 |
| FERMT3  | -0.29 | 6.13E-01 | 0.64  | 2.61E-01 | -0.04 | 5.15E-01 |
| S100A10 | -0.29 | 6.13E-01 | 1.44  | 7.48E-02 | -0.73 | 7.67E-01 |
| CAD     | -0.29 | 6.13E-01 | -1.02 | 8.47E-01 | 0.16  | 4.35E-01 |
| SMAD6   | -0.29 | 6.13E-01 | -1.77 | 9.61E-01 | 0.62  | 2.68E-01 |
| SCMH1   | -0.29 | 6.13E-01 | 0.34  | 3.67E-01 | -2.06 | 9.80E-01 |
| EPHA7   | -0.29 | 6.13E-01 | -1.05 | 8.53E-01 | 0.65  | 2.58E-01 |
| TRDN    | -0.29 | 6.13E-01 | 0.43  | 3.34E-01 | -0.31 | 6.23E-01 |
| RGS9    | -0.29 | 6.13E-01 | -0.39 | 6.50E-01 | 0.60  | 2.75E-01 |
| ZNF860  | -0.29 | 6.13E-01 | -0.46 | 6.77E-01 | 0.62  | 2.68E-01 |
| SIKE1   | -0.29 | 6.13E-01 | -2.00 | 9.77E-01 | 0.12  | 4.54E-01 |
| GPR78   | -0.29 | 6.13E-01 | -1.08 | 8.59E-01 | -0.26 | 6.03E-01 |
| TMEM230 | -0.29 | 6.13E-01 | -0.95 | 8.29E-01 | -0.13 | 5.51E-01 |

|          |       |          |       |          |       |          |
|----------|-------|----------|-------|----------|-------|----------|
| PTAFR    | -0.29 | 6.13E-01 | -0.83 | 7.96E-01 | 0.99  | 1.61E-01 |
| PWP2     | -0.29 | 6.13E-01 | -0.32 | 6.25E-01 | -0.10 | 5.41E-01 |
| CD300C   | -0.29 | 6.14E-01 | -0.02 | 5.10E-01 | 0.65  | 2.57E-01 |
| LPPR4    | -0.29 | 6.14E-01 | -1.58 | 9.43E-01 | -0.29 | 6.13E-01 |
| C9orf92  | -0.29 | 6.14E-01 | 0.90  | 1.83E-01 | -1.96 | 9.75E-01 |
| SLC7A1   | -0.29 | 6.14E-01 | 0.93  | 1.77E-01 | -1.79 | 9.63E-01 |
| TM6SF2   | -0.29 | 6.14E-01 | -1.53 | 9.37E-01 | -0.21 | 5.84E-01 |
| ARHGEF19 | -0.29 | 6.14E-01 | -1.27 | 8.99E-01 | -0.27 | 6.05E-01 |
| PLAC8L1  | -0.29 | 6.14E-01 | 0.90  | 1.84E-01 | 0.31  | 3.77E-01 |
| TMC3     | -0.29 | 6.14E-01 | 0.24  | 4.05E-01 | 0.94  | 1.73E-01 |
| P2RY11   | -0.29 | 6.14E-01 | -1.80 | 9.64E-01 | 0.44  | 3.29E-01 |
| WDR83    | -0.29 | 6.14E-01 | -0.12 | 5.48E-01 | -0.69 | 7.53E-01 |
| PKHD1L1  | -0.29 | 6.14E-01 | -1.64 | 9.50E-01 | 0.16  | 4.35E-01 |
| ABCC11   | -0.29 | 6.14E-01 | -1.29 | 9.01E-01 | 0.25  | 4.01E-01 |
| FRAT1    | -0.29 | 6.14E-01 | 0.65  | 2.57E-01 | 0.39  | 3.50E-01 |
| HTN1     | -0.29 | 6.14E-01 | -0.25 | 5.99E-01 | -0.31 | 6.21E-01 |
| STXBP4   | -0.29 | 6.14E-01 | 0.63  | 2.63E-01 | 0.56  | 2.88E-01 |
| OTUD4    | -0.29 | 6.14E-01 | 0.50  | 3.10E-01 | 0.18  | 4.29E-01 |
| LHX3     | -0.29 | 6.14E-01 | -0.69 | 7.55E-01 | -0.98 | 8.37E-01 |
| OR52K2   | -0.29 | 6.14E-01 | -0.09 | 5.36E-01 | -0.13 | 5.51E-01 |
| MCM4     | -0.29 | 6.14E-01 | 1.32  | 9.42E-02 | 0.24  | 4.06E-01 |
| ERI3     | -0.29 | 6.14E-01 | -1.70 | 9.56E-01 | 0.33  | 3.70E-01 |
| ATP5L2   | -0.29 | 6.14E-01 | -0.82 | 7.95E-01 | 0.49  | 3.12E-01 |
| DGKD     | -0.29 | 6.15E-01 | -0.34 | 6.34E-01 | -0.24 | 5.94E-01 |
| FZD4     | -0.29 | 6.15E-01 | 0.46  | 3.24E-01 | -0.27 | 6.07E-01 |
| CSTL1    | -0.29 | 6.15E-01 | 0.12  | 4.52E-01 | -1.34 | 9.09E-01 |
| ELMO1    | -0.29 | 6.15E-01 | 0.10  | 4.60E-01 | -2.41 | 9.92E-01 |
| CEP135   | -0.29 | 6.15E-01 | -0.08 | 5.30E-01 | 0.93  | 1.77E-01 |
| DMRTA2   | -0.29 | 6.15E-01 | -0.04 | 5.17E-01 | -1.72 | 9.57E-01 |
| BSG      | -0.29 | 6.15E-01 | 0.44  | 3.29E-01 | -0.07 | 5.27E-01 |
| ICK      | -0.29 | 6.15E-01 | 0.66  | 2.54E-01 | -1.93 | 9.73E-01 |

|          |       |          |       |          |       |          |
|----------|-------|----------|-------|----------|-------|----------|
| GOS2     | -0.29 | 6.15E-01 | 0.99  | 1.60E-01 | 0.99  | 1.61E-01 |
| PTTG1    | -0.29 | 6.15E-01 | 0.03  | 4.90E-01 | -0.07 | 5.27E-01 |
| UBASH3B  | -0.29 | 6.15E-01 | -1.51 | 9.35E-01 | 0.29  | 3.85E-01 |
| TCTE1    | -0.29 | 6.15E-01 | -0.39 | 6.51E-01 | -1.78 | 9.62E-01 |
| MIER2    | -0.29 | 6.15E-01 | -0.64 | 7.39E-01 | -0.73 | 7.68E-01 |
| FAHD1    | -0.29 | 6.15E-01 | -0.45 | 6.75E-01 | -0.56 | 7.14E-01 |
| FBXO2    | -0.29 | 6.15E-01 | -0.27 | 6.05E-01 | -0.36 | 6.41E-01 |
| RDH5     | -0.29 | 6.15E-01 | 0.00  | 4.98E-01 | -1.40 | 9.19E-01 |
| NUGGC    | -0.29 | 6.15E-01 | -0.84 | 7.99E-01 | -0.71 | 7.60E-01 |
| SMIM22   | -0.29 | 6.15E-01 | 0.95  | 1.70E-01 | -0.41 | 6.58E-01 |
| ANKRD13B | -0.29 | 6.15E-01 | -0.23 | 5.93E-01 | -0.81 | 7.92E-01 |
| C6orf195 | -0.29 | 6.15E-01 | 0.49  | 3.12E-01 | -0.98 | 8.37E-01 |
| SUSD5    | -0.29 | 6.15E-01 | -0.12 | 5.47E-01 | -1.40 | 9.19E-01 |
| SPDYA    | -0.29 | 6.15E-01 | 1.33  | 9.12E-02 | -0.28 | 6.10E-01 |
| CEP19    | -0.29 | 6.16E-01 | -0.50 | 6.92E-01 | -0.95 | 8.29E-01 |
| BST1     | -0.29 | 6.16E-01 | -0.19 | 5.77E-01 | -0.69 | 7.54E-01 |
| SPRR1A   | -0.29 | 6.16E-01 | -0.45 | 6.74E-01 | -1.09 | 8.62E-01 |
| LYZL6    | -0.29 | 6.16E-01 | -1.12 | 8.69E-01 | -0.41 | 6.61E-01 |
| NANOG    | -0.29 | 6.16E-01 | 0.55  | 2.91E-01 | -0.60 | 7.27E-01 |
| PRM2     | -0.30 | 6.16E-01 | 0.47  | 3.17E-01 | 0.71  | 2.39E-01 |
| CREBBP   | -0.30 | 6.16E-01 | -1.38 | 9.16E-01 | 1.00  | 1.58E-01 |
| FCAMR    | -0.30 | 6.16E-01 | 1.28  | 1.00E-01 | 1.48  | 6.96E-02 |
| CACNB3   | -0.30 | 6.16E-01 | -0.60 | 7.26E-01 | 0.84  | 2.01E-01 |
| ZNF512B  | -0.30 | 6.16E-01 | -0.56 | 7.11E-01 | -0.15 | 5.61E-01 |
| SGTB     | -0.30 | 6.16E-01 | -0.31 | 6.20E-01 | 1.81  | 3.53E-02 |
| KIF24    | -0.30 | 6.16E-01 | -1.10 | 8.63E-01 | 0.34  | 3.67E-01 |
| TAS2R38  | -0.30 | 6.17E-01 | -0.43 | 6.67E-01 | 0.24  | 4.07E-01 |
| MIP      | -0.30 | 6.17E-01 | -0.40 | 6.56E-01 | -0.84 | 7.98E-01 |
| BLM      | -0.30 | 6.17E-01 | -0.17 | 5.68E-01 | -0.62 | 7.31E-01 |
| TPPP2    | -0.30 | 6.17E-01 | 1.10  | 1.36E-01 | -0.16 | 5.63E-01 |
| ERCC5    | -0.30 | 6.17E-01 | 0.96  | 1.69E-01 | -1.09 | 8.62E-01 |



|              |       |          |       |          |       |          |
|--------------|-------|----------|-------|----------|-------|----------|
| TRIM21       | -0.30 | 6.17E-01 | -1.70 | 9.55E-01 | 0.14  | 4.45E-01 |
| CYP3A7       | -0.30 | 6.17E-01 | -0.48 | 6.85E-01 | -0.81 | 7.91E-01 |
| ABHD13       | -0.30 | 6.17E-01 | 0.01  | 4.96E-01 | 0.75  | 2.26E-01 |
| PPFIBP2      | -0.30 | 6.17E-01 | 0.04  | 4.83E-01 | -0.51 | 6.96E-01 |
| DAGLB        | -0.30 | 6.17E-01 | -0.01 | 5.04E-01 | 0.29  | 3.84E-01 |
| GAS6         | -0.30 | 6.17E-01 | -0.81 | 7.90E-01 | 0.10  | 4.59E-01 |
| RGS22        | -0.30 | 6.17E-01 | -0.13 | 5.51E-01 | -0.08 | 5.31E-01 |
| TNC          | -0.30 | 6.17E-01 | -0.12 | 5.47E-01 | -0.77 | 7.80E-01 |
| NDUFA4L2     | -0.30 | 6.17E-01 | -1.02 | 8.47E-01 | -0.40 | 6.55E-01 |
| SGK3         | -0.30 | 6.17E-01 | 0.21  | 4.18E-01 | -1.42 | 9.22E-01 |
| TMEM99       | -0.30 | 6.18E-01 | 0.44  | 3.29E-01 | -0.28 | 6.10E-01 |
| MEST         | -0.30 | 6.18E-01 | 0.25  | 4.00E-01 | -1.10 | 8.65E-01 |
| C8orf44-SGK3 | -0.30 | 6.18E-01 | 0.17  | 4.32E-01 | -1.40 | 9.19E-01 |
| DPY19L4      | -0.30 | 6.18E-01 | -1.06 | 8.54E-01 | -0.61 | 7.28E-01 |
| CHD5         | -0.30 | 6.18E-01 | 0.40  | 3.44E-01 | -1.36 | 9.13E-01 |
| TATDN3       | -0.30 | 6.18E-01 | -0.67 | 7.48E-01 | 0.62  | 2.66E-01 |
| ATXN3        | -0.30 | 6.18E-01 | -0.04 | 5.14E-01 | -1.39 | 9.18E-01 |
| ZNF131       | -0.30 | 6.18E-01 | -0.27 | 6.05E-01 | -0.22 | 5.86E-01 |
| TMEM119      | -0.30 | 6.18E-01 | 0.93  | 1.77E-01 | 0.17  | 4.31E-01 |
| PGAP1        | -0.30 | 6.18E-01 | -0.04 | 5.14E-01 | -0.45 | 6.75E-01 |
| IL13         | -0.30 | 6.18E-01 | -1.18 | 8.82E-01 | 0.56  | 2.86E-01 |
| BACH2        | -0.30 | 6.18E-01 | 0.27  | 3.92E-01 | 1.66  | 4.81E-02 |
| NIPA1        | -0.30 | 6.18E-01 | 0.75  | 2.26E-01 | -1.07 | 8.58E-01 |
| GALR3        | -0.30 | 6.18E-01 | 0.55  | 2.92E-01 | -0.86 | 8.04E-01 |
| TMEM135      | -0.30 | 6.18E-01 | 1.06  | 1.44E-01 | 0.98  | 1.63E-01 |
| RRNAD1       | -0.30 | 6.18E-01 | 0.67  | 2.51E-01 | 0.42  | 3.39E-01 |
| SNX13        | -0.30 | 6.19E-01 | 1.75  | 3.98E-02 | 0.81  | 2.10E-01 |
| CYP4F11      | -0.30 | 6.19E-01 | 0.11  | 4.56E-01 | -1.08 | 8.61E-01 |
| ZNF782       | -0.30 | 6.19E-01 | -1.10 | 8.64E-01 | 0.10  | 4.58E-01 |
| ELMOD1       | -0.30 | 6.19E-01 | -0.37 | 6.43E-01 | -1.06 | 8.55E-01 |
| IL17RC       | -0.30 | 6.19E-01 | 0.06  | 4.76E-01 | 0.24  | 4.07E-01 |

|           |       |          |       |          |       |          |
|-----------|-------|----------|-------|----------|-------|----------|
| AKAP1     | -0.30 | 6.19E-01 | -1.35 | 9.12E-01 | 0.14  | 4.42E-01 |
| ZNF492    | -0.30 | 6.19E-01 | -0.66 | 7.46E-01 | -0.35 | 6.37E-01 |
| PTGS1     | -0.30 | 6.19E-01 | 0.84  | 2.02E-01 | -0.44 | 6.69E-01 |
| DHX33     | -0.30 | 6.19E-01 | -0.80 | 7.88E-01 | 1.20  | 1.14E-01 |
| HPS1      | -0.30 | 6.19E-01 | -0.03 | 5.13E-01 | 0.26  | 3.99E-01 |
| KIF13B    | -0.30 | 6.19E-01 | 0.97  | 1.66E-01 | 2.35  | 9.45E-03 |
| PRKAB1    | -0.30 | 6.19E-01 | 0.82  | 2.07E-01 | 1.63  | 5.19E-02 |
| NR4A3     | -0.30 | 6.19E-01 | -0.02 | 5.07E-01 | -0.34 | 6.31E-01 |
| BRD1      | -0.30 | 6.19E-01 | 0.74  | 2.30E-01 | -1.63 | 9.48E-01 |
| MICALL1   | -0.30 | 6.19E-01 | -1.03 | 8.49E-01 | 0.20  | 4.22E-01 |
| LRRIQ3    | -0.30 | 6.19E-01 | -0.78 | 7.81E-01 | -1.08 | 8.60E-01 |
| HCST      | -0.30 | 6.19E-01 | -0.37 | 6.45E-01 | 0.53  | 2.98E-01 |
| NDUFA5    | -0.30 | 6.19E-01 | -0.47 | 6.81E-01 | -0.25 | 6.00E-01 |
| CEMP1     | -0.30 | 6.19E-01 | 0.87  | 1.93E-01 | -0.26 | 6.02E-01 |
| RNF216    | -0.30 | 6.19E-01 | -0.89 | 8.13E-01 | 0.33  | 3.72E-01 |
| CYP24A1   | -0.30 | 6.19E-01 | 0.24  | 4.06E-01 | 0.05  | 4.79E-01 |
| DDX4      | -0.30 | 6.19E-01 | -1.37 | 9.15E-01 | 0.76  | 2.24E-01 |
| GTSCR1    | -0.30 | 6.19E-01 | -0.06 | 5.24E-01 | -0.62 | 7.32E-01 |
| GBGT1     | -0.30 | 6.20E-01 | -0.49 | 6.89E-01 | 0.26  | 3.96E-01 |
| MPP5      | -0.30 | 6.20E-01 | -0.25 | 6.00E-01 | 0.00  | 5.01E-01 |
| WDR54     | -0.30 | 6.20E-01 | -0.59 | 7.24E-01 | -0.64 | 7.39E-01 |
| ZNF251    | -0.30 | 6.20E-01 | -0.91 | 8.18E-01 | -0.34 | 6.34E-01 |
| LMNA      | -0.30 | 6.20E-01 | -0.47 | 6.81E-01 | -0.42 | 6.64E-01 |
| RDX       | -0.30 | 6.20E-01 | -0.43 | 6.68E-01 | -1.18 | 8.82E-01 |
| PAM16     | -0.30 | 6.20E-01 | -0.64 | 7.38E-01 | 1.03  | 1.51E-01 |
| RIF1      | -0.31 | 6.20E-01 | -0.13 | 5.53E-01 | 1.07  | 1.42E-01 |
| PHACTR2   | -0.31 | 6.20E-01 | -0.69 | 7.55E-01 | -0.59 | 7.24E-01 |
| EPO       | -0.31 | 6.20E-01 | -0.34 | 6.31E-01 | 0.13  | 4.49E-01 |
| F13A1     | -0.31 | 6.20E-01 | -1.79 | 9.64E-01 | -1.10 | 8.63E-01 |
| IL15      | -0.31 | 6.20E-01 | 0.30  | 3.82E-01 | 1.30  | 9.64E-02 |
| KIAA1211L | -0.31 | 6.20E-01 | -0.19 | 5.77E-01 | -0.03 | 5.10E-01 |

|              |       |          |       |          |       |          |
|--------------|-------|----------|-------|----------|-------|----------|
| EVA1C        | -0.31 | 6.20E-01 | -0.15 | 5.58E-01 | 0.60  | 2.74E-01 |
| DIP2A        | -0.31 | 6.20E-01 | -0.80 | 7.89E-01 | 1.57  | 5.78E-02 |
| ZNF425       | -0.31 | 6.21E-01 | -0.78 | 7.81E-01 | 0.64  | 2.62E-01 |
| GPX3         | -0.31 | 6.21E-01 | -0.90 | 8.16E-01 | 1.29  | 9.83E-02 |
| BFSP2        | -0.31 | 6.21E-01 | 0.03  | 4.88E-01 | -0.55 | 7.07E-01 |
| MACC1        | -0.31 | 6.21E-01 | -0.71 | 7.62E-01 | 0.13  | 4.48E-01 |
| IL37         | -0.31 | 6.21E-01 | 0.13  | 4.49E-01 | 1.70  | 4.45E-02 |
| CR1L         | -0.31 | 6.21E-01 | 0.54  | 2.95E-01 | -0.66 | 7.46E-01 |
| PDCD7        | -0.31 | 6.21E-01 | -0.62 | 7.31E-01 | -0.31 | 6.23E-01 |
| CACNB1       | -0.31 | 6.21E-01 | 0.96  | 1.68E-01 | 0.96  | 1.69E-01 |
| ADIPOR1      | -0.31 | 6.21E-01 | -1.79 | 9.63E-01 | 0.53  | 3.00E-01 |
| STAMBPL1     | -0.31 | 6.21E-01 | -0.90 | 8.17E-01 | -0.39 | 6.52E-01 |
| CEACAM7      | -0.31 | 6.21E-01 | 1.20  | 1.16E-01 | -0.65 | 7.42E-01 |
| SDF2L1       | -0.31 | 6.21E-01 | 1.07  | 1.43E-01 | 1.06  | 1.44E-01 |
| MRPS16       | -0.31 | 6.21E-01 | -0.89 | 8.13E-01 | -0.32 | 6.26E-01 |
| ODF3L1       | -0.31 | 6.21E-01 | 0.06  | 4.77E-01 | -0.40 | 6.56E-01 |
| KRBOX1       | -0.31 | 6.21E-01 | -0.31 | 6.22E-01 | 0.65  | 2.57E-01 |
| SEMA3C       | -0.31 | 6.21E-01 | 1.31  | 9.47E-02 | 0.19  | 4.27E-01 |
| IFT43        | -0.31 | 6.21E-01 | -0.48 | 6.84E-01 | -0.75 | 7.74E-01 |
| KIF21B       | -0.31 | 6.21E-01 | -0.14 | 5.55E-01 | -0.03 | 5.13E-01 |
| KLF5         | -0.31 | 6.21E-01 | -1.12 | 8.69E-01 | 1.51  | 6.59E-02 |
| GAB1         | -0.31 | 6.21E-01 | 0.17  | 4.33E-01 | 2.25  | 1.21E-02 |
| OR10G4       | -0.31 | 6.21E-01 | -0.25 | 6.00E-01 | -0.71 | 7.62E-01 |
| SPATA2       | -0.31 | 6.21E-01 | 0.02  | 4.92E-01 | -1.70 | 9.55E-01 |
| DEFB133      | -0.31 | 6.21E-01 | -0.51 | 6.94E-01 | -0.22 | 5.89E-01 |
| ALDH3B1      | -0.31 | 6.21E-01 | -0.30 | 6.18E-01 | 0.98  | 1.63E-01 |
| RP11-512M8.5 | -0.31 | 6.21E-01 | -0.28 | 6.10E-01 | -0.28 | 6.11E-01 |
| USP15        | -0.31 | 6.21E-01 | 0.32  | 3.75E-01 | 0.47  | 3.18E-01 |
| GMFB         | -0.31 | 6.21E-01 | 0.49  | 3.14E-01 | -1.24 | 8.93E-01 |
| FAM193B      | -0.31 | 6.22E-01 | -0.82 | 7.94E-01 | -1.07 | 8.57E-01 |
| DTNA         | -0.31 | 6.22E-01 | 2.25  | 1.23E-02 | 0.89  | 1.86E-01 |

|            |       |          |       |          |       |          |
|------------|-------|----------|-------|----------|-------|----------|
| TMEM240    | -0.31 | 6.22E-01 | -0.29 | 6.15E-01 | -0.70 | 7.59E-01 |
| C1QC       | -0.31 | 6.22E-01 | -0.92 | 8.20E-01 | 0.63  | 2.66E-01 |
| ACACB      | -0.31 | 6.22E-01 | 0.52  | 3.02E-01 | 0.65  | 2.59E-01 |
| HIVEP1     | -0.31 | 6.22E-01 | -0.22 | 5.89E-01 | -0.90 | 8.15E-01 |
| COX11      | -0.31 | 6.22E-01 | 0.37  | 3.55E-01 | 1.33  | 9.19E-02 |
| FAR1       | -0.31 | 6.22E-01 | -0.14 | 5.57E-01 | 0.68  | 2.50E-01 |
| FDXR       | -0.31 | 6.22E-01 | -0.83 | 7.98E-01 | 0.12  | 4.52E-01 |
| OR51S1     | -0.31 | 6.22E-01 | 0.64  | 2.62E-01 | -1.47 | 9.29E-01 |
| ARID5A     | -0.31 | 6.22E-01 | -0.30 | 6.19E-01 | -1.26 | 8.96E-01 |
| FCGR2B     | -0.31 | 6.22E-01 | -0.25 | 5.97E-01 | -1.19 | 8.82E-01 |
| OSTM1      | -0.31 | 6.22E-01 | 0.20  | 4.19E-01 | -1.56 | 9.41E-01 |
| SEPN1      | -0.31 | 6.22E-01 | -0.32 | 6.24E-01 | -0.94 | 8.26E-01 |
| JAK3       | -0.31 | 6.22E-01 | -0.30 | 6.17E-01 | 0.06  | 4.78E-01 |
| XKR8       | -0.31 | 6.22E-01 | -0.27 | 6.08E-01 | 1.56  | 5.92E-02 |
| C9orf152   | -0.31 | 6.22E-01 | 0.93  | 1.77E-01 | 0.93  | 1.76E-01 |
| TSACC      | -0.31 | 6.22E-01 | -0.17 | 5.69E-01 | -0.72 | 7.63E-01 |
| GLIS1      | -0.31 | 6.22E-01 | 0.20  | 4.22E-01 | -1.57 | 9.42E-01 |
| LURAP1L    | -0.31 | 6.22E-01 | -1.16 | 8.77E-01 | -0.41 | 6.61E-01 |
| MCMDC2     | -0.31 | 6.22E-01 | 0.29  | 3.86E-01 | -1.24 | 8.92E-01 |
| SIX1       | -0.31 | 6.23E-01 | -0.53 | 7.02E-01 | 0.28  | 3.89E-01 |
| AC106876.2 | -0.31 | 6.23E-01 | -0.21 | 5.82E-01 | 1.84  | 3.31E-02 |
| TBC1D4     | -0.31 | 6.23E-01 | -0.70 | 7.58E-01 | -1.20 | 8.84E-01 |
| S100A4     | -0.31 | 6.23E-01 | 0.12  | 4.51E-01 | 0.94  | 1.72E-01 |
| S1PR3      | -0.31 | 6.23E-01 | -0.14 | 5.57E-01 | -0.18 | 5.70E-01 |
| ABAT       | -0.31 | 6.23E-01 | -0.36 | 6.42E-01 | 2.69  | 3.57E-03 |
| BAIAP2L2   | -0.31 | 6.23E-01 | -1.04 | 8.52E-01 | -0.25 | 5.97E-01 |
| C2orf61    | -0.31 | 6.23E-01 | -0.03 | 5.13E-01 | -1.78 | 9.62E-01 |
| SYNGR2     | -0.31 | 6.23E-01 | 0.77  | 2.20E-01 | -0.99 | 8.40E-01 |
| LRRTM3     | -0.31 | 6.23E-01 | 1.60  | 5.52E-02 | 0.31  | 3.80E-01 |
| C7orf69    | -0.31 | 6.23E-01 | -0.88 | 8.10E-01 | 0.72  | 2.36E-01 |
| MTIF2      | -0.31 | 6.23E-01 | -0.53 | 7.02E-01 | -0.83 | 7.98E-01 |

|          |       |          |       |          |       |          |
|----------|-------|----------|-------|----------|-------|----------|
| SLC39A1  | -0.31 | 6.23E-01 | -0.42 | 6.64E-01 | 1.88  | 3.00E-02 |
| RBM15B   | -0.31 | 6.23E-01 | -0.30 | 6.20E-01 | -0.40 | 6.56E-01 |
| ANKRD34A | -0.31 | 6.23E-01 | 0.33  | 3.70E-01 | -0.34 | 6.31E-01 |
| FTL      | -0.31 | 6.23E-01 | -0.54 | 7.07E-01 | -1.18 | 8.81E-01 |
| RPAP1    | -0.31 | 6.23E-01 | -0.05 | 5.19E-01 | -1.41 | 9.21E-01 |
| USP29    | -0.31 | 6.23E-01 | -0.56 | 7.11E-01 | -1.26 | 8.96E-01 |
| SORCS3   | -0.31 | 6.23E-01 | 1.02  | 1.54E-01 | -0.87 | 8.09E-01 |
| RPS6     | -0.31 | 6.23E-01 | -0.98 | 8.36E-01 | 0.36  | 3.60E-01 |
| SLC19A1  | -0.31 | 6.24E-01 | 0.39  | 3.47E-01 | -0.44 | 6.71E-01 |
| DOK2     | -0.31 | 6.24E-01 | 0.06  | 4.75E-01 | -1.62 | 9.47E-01 |
| EPB41L1  | -0.31 | 6.24E-01 | -0.66 | 7.47E-01 | -0.78 | 7.82E-01 |
| CLEC2A   | -0.32 | 6.24E-01 | -0.09 | 5.37E-01 | -1.39 | 9.17E-01 |
| PRPH2    | -0.32 | 6.24E-01 | -0.05 | 5.18E-01 | -0.66 | 7.44E-01 |
| MYCBP2   | -0.32 | 6.24E-01 | 0.55  | 2.92E-01 | -0.67 | 7.50E-01 |
| TMEM261  | -0.32 | 6.24E-01 | -0.06 | 5.25E-01 | -0.04 | 5.17E-01 |
| MRPS10   | -0.32 | 6.24E-01 | -0.42 | 6.61E-01 | -1.21 | 8.87E-01 |
| PPM1G    | -0.32 | 6.24E-01 | -0.36 | 6.41E-01 | 1.48  | 6.93E-02 |
| BMP4     | -0.32 | 6.24E-01 | 0.77  | 2.21E-01 | 0.35  | 3.65E-01 |
| MT1M     | -0.32 | 6.24E-01 | 0.66  | 2.55E-01 | -0.43 | 6.65E-01 |
| TMEM200C | -0.32 | 6.24E-01 | 0.64  | 2.61E-01 | -1.72 | 9.57E-01 |
| KCNQ4    | -0.32 | 6.24E-01 | -1.64 | 9.49E-01 | -0.21 | 5.84E-01 |
| CHPF     | -0.32 | 6.24E-01 | -0.12 | 5.49E-01 | -0.93 | 8.24E-01 |
| DOCK2    | -0.32 | 6.24E-01 | 0.21  | 4.16E-01 | -0.41 | 6.60E-01 |
| TK2      | -0.32 | 6.24E-01 | -1.32 | 9.07E-01 | 0.31  | 3.77E-01 |
| IL17D    | -0.32 | 6.24E-01 | -0.85 | 8.03E-01 | -0.41 | 6.57E-01 |
| PHB      | -0.32 | 6.24E-01 | -0.05 | 5.19E-01 | 0.58  | 2.81E-01 |
| HTR3E    | -0.32 | 6.25E-01 | 0.09  | 4.64E-01 | 0.22  | 4.14E-01 |
| MYO7B    | -0.32 | 6.25E-01 | -0.72 | 7.64E-01 | 1.38  | 8.44E-02 |
| C10orf76 | -0.32 | 6.25E-01 | -0.27 | 6.06E-01 | 0.74  | 2.29E-01 |
| KIAA0391 | -0.32 | 6.25E-01 | 0.29  | 3.88E-01 | -0.06 | 5.24E-01 |
| RGS10    | -0.32 | 6.25E-01 | 0.91  | 1.81E-01 | -1.08 | 8.60E-01 |

|          |       |          |       |          |       |          |
|----------|-------|----------|-------|----------|-------|----------|
| KNG1     | -0.32 | 6.25E-01 | -0.26 | 6.02E-01 | -1.50 | 9.33E-01 |
| C1QB     | -0.32 | 6.25E-01 | -0.24 | 5.94E-01 | -0.90 | 8.15E-01 |
| CDX2     | -0.32 | 6.25E-01 | -0.40 | 6.55E-01 | 0.43  | 3.32E-01 |
| GNG7     | -0.32 | 6.25E-01 | -0.11 | 5.42E-01 | 0.22  | 4.14E-01 |
| ODC1     | -0.32 | 6.25E-01 | 0.18  | 4.28E-01 | 2.10  | 1.79E-02 |
| CREBL2   | -0.32 | 6.25E-01 | -0.06 | 5.25E-01 | 0.04  | 4.85E-01 |
| YDJC     | -0.32 | 6.25E-01 | 0.89  | 1.88E-01 | 0.17  | 4.32E-01 |
| NAGLU    | -0.32 | 6.25E-01 | -2.11 | 9.82E-01 | 0.12  | 4.51E-01 |
| 43353    | -0.32 | 6.25E-01 | -0.25 | 6.00E-01 | -1.56 | 9.41E-01 |
| METRNL   | -0.32 | 6.25E-01 | -0.18 | 5.73E-01 | -2.00 | 9.77E-01 |
| ACER2    | -0.32 | 6.25E-01 | -1.01 | 8.43E-01 | -0.40 | 6.55E-01 |
| ZNF780B  | -0.32 | 6.25E-01 | -1.02 | 8.45E-01 | -0.36 | 6.40E-01 |
| BRAF     | -0.32 | 6.25E-01 | 0.05  | 4.82E-01 | -0.48 | 6.86E-01 |
| ETFDH    | -0.32 | 6.25E-01 | -1.35 | 9.11E-01 | -1.15 | 8.75E-01 |
| PRSS46   | -0.32 | 6.25E-01 | -0.99 | 8.38E-01 | -0.05 | 5.20E-01 |
| ORAI2    | -0.32 | 6.25E-01 | -0.51 | 6.94E-01 | 0.48  | 3.16E-01 |
| TRAK1    | -0.32 | 6.26E-01 | -1.35 | 9.12E-01 | 0.41  | 3.41E-01 |
| DMC1     | -0.32 | 6.26E-01 | 1.19  | 1.16E-01 | -0.76 | 7.77E-01 |
| PLAGL2   | -0.32 | 6.26E-01 | 0.92  | 1.78E-01 | 1.47  | 7.12E-02 |
| LRRC14B  | -0.32 | 6.26E-01 | -1.44 | 9.25E-01 | -0.01 | 5.02E-01 |
| FNTA     | -0.32 | 6.26E-01 | -0.63 | 7.35E-01 | 1.11  | 1.34E-01 |
| C10orf25 | -0.32 | 6.26E-01 | -0.52 | 6.97E-01 | -0.04 | 5.15E-01 |
| MED10    | -0.32 | 6.26E-01 | 0.47  | 3.18E-01 | -1.92 | 9.73E-01 |
| C3orf67  | -0.32 | 6.26E-01 | -0.32 | 6.25E-01 | -1.05 | 8.54E-01 |
| FAM153C  | -0.32 | 6.26E-01 | 0.01  | 4.94E-01 | -0.81 | 7.91E-01 |
| PITPNM1  | -0.32 | 6.26E-01 | -0.12 | 5.48E-01 | -1.17 | 8.79E-01 |
| C12orf57 | -0.32 | 6.26E-01 | -1.49 | 9.32E-01 | -0.07 | 5.27E-01 |
| DHCR24   | -0.32 | 6.26E-01 | -0.16 | 5.64E-01 | 1.19  | 1.17E-01 |
| ANKRD24  | -0.32 | 6.26E-01 | -0.57 | 7.14E-01 | -0.90 | 8.17E-01 |
| C3orf52  | -0.32 | 6.26E-01 | -0.31 | 6.22E-01 | 0.54  | 2.94E-01 |
| SLC22A4  | -0.32 | 6.26E-01 | -0.24 | 5.95E-01 | 1.06  | 1.45E-01 |

|           |       |          |       |          |       |          |
|-----------|-------|----------|-------|----------|-------|----------|
| FPR1      | -0.32 | 6.26E-01 | -0.17 | 5.66E-01 | -1.49 | 9.32E-01 |
| OR52N2    | -0.32 | 6.26E-01 | -1.10 | 8.64E-01 | -0.22 | 5.86E-01 |
| EPHB6     | -0.32 | 6.26E-01 | 0.19  | 4.23E-01 | 0.28  | 3.88E-01 |
| LILRB1    | -0.32 | 6.26E-01 | -0.13 | 5.52E-01 | 0.51  | 3.03E-01 |
| OR5H2     | -0.32 | 6.26E-01 | -0.46 | 6.78E-01 | -0.88 | 8.11E-01 |
| RLN3      | -0.32 | 6.26E-01 | -0.34 | 6.34E-01 | -1.21 | 8.87E-01 |
| TSPAN8    | -0.32 | 6.26E-01 | -0.84 | 7.99E-01 | 0.58  | 2.80E-01 |
| NUP210L   | -0.32 | 6.27E-01 | -0.75 | 7.74E-01 | 1.18  | 1.18E-01 |
| ACTL7B    | -0.32 | 6.27E-01 | -0.29 | 6.13E-01 | 0.32  | 3.75E-01 |
| TMEM117   | -0.32 | 6.27E-01 | 0.61  | 2.72E-01 | -1.15 | 8.74E-01 |
| DAB2      | -0.32 | 6.27E-01 | -1.40 | 9.19E-01 | 0.59  | 2.77E-01 |
| NYAP1     | -0.32 | 6.27E-01 | -0.40 | 6.54E-01 | -1.08 | 8.59E-01 |
| DIAPH3    | -0.32 | 6.27E-01 | 0.90  | 1.85E-01 | -0.27 | 6.05E-01 |
| CRYGA     | -0.32 | 6.27E-01 | -1.07 | 8.58E-01 | 0.15  | 4.41E-01 |
| H3F3A     | -0.32 | 6.27E-01 | 0.75  | 2.27E-01 | 0.97  | 1.65E-01 |
| MRPS30    | -0.32 | 6.27E-01 | -0.69 | 7.56E-01 | 0.27  | 3.92E-01 |
| GRPEL1    | -0.32 | 6.27E-01 | 0.10  | 4.61E-01 | -0.67 | 7.50E-01 |
| RAC2      | -0.32 | 6.27E-01 | -1.63 | 9.49E-01 | -0.35 | 6.38E-01 |
| KCNJ11    | -0.32 | 6.27E-01 | -0.12 | 5.47E-01 | -0.91 | 8.17E-01 |
| KRTAP17-1 | -0.32 | 6.27E-01 | -0.34 | 6.33E-01 | -0.96 | 8.31E-01 |
| RPL8      | -0.32 | 6.27E-01 | 0.08  | 4.69E-01 | -0.43 | 6.65E-01 |
| DSN1      | -0.32 | 6.27E-01 | -0.22 | 5.89E-01 | 0.30  | 3.81E-01 |
| SSBP1     | -0.32 | 6.27E-01 | -0.08 | 5.31E-01 | -0.75 | 7.73E-01 |
| CIRH1A    | -0.32 | 6.27E-01 | -1.24 | 8.93E-01 | 1.35  | 8.88E-02 |
| ACMSD     | -0.32 | 6.27E-01 | -0.17 | 5.66E-01 | 0.00  | 4.99E-01 |
| PIK3R5    | -0.32 | 6.27E-01 | 1.42  | 7.71E-02 | 0.72  | 2.35E-01 |
| COL1A1    | -0.32 | 6.27E-01 | 0.44  | 3.29E-01 | -1.09 | 8.63E-01 |
| IRGC      | -0.32 | 6.27E-01 | -0.88 | 8.12E-01 | -0.42 | 6.62E-01 |
| GRM6      | -0.32 | 6.27E-01 | 0.09  | 4.62E-01 | -0.47 | 6.79E-01 |
| CCL22     | -0.32 | 6.27E-01 | 0.47  | 3.21E-01 | -0.06 | 5.24E-01 |
| OGFRL1    | -0.32 | 6.27E-01 | -0.06 | 5.22E-01 | -0.70 | 7.58E-01 |

|          |       |          |       |          |       |          |
|----------|-------|----------|-------|----------|-------|----------|
| SVIP     | -0.32 | 6.27E-01 | 0.39  | 3.46E-01 | -0.92 | 8.21E-01 |
| IGSF22   | -0.32 | 6.27E-01 | 0.48  | 3.16E-01 | -1.77 | 9.62E-01 |
| PCDHB10  | -0.33 | 6.27E-01 | -0.08 | 5.31E-01 | -2.22 | 9.87E-01 |
| C2CD2    | -0.33 | 6.27E-01 | 0.35  | 3.63E-01 | -1.14 | 8.74E-01 |
| CASC3    | -0.33 | 6.27E-01 | -0.92 | 8.22E-01 | -0.34 | 6.32E-01 |
| BIRC3    | -0.33 | 6.28E-01 | -0.88 | 8.10E-01 | 0.63  | 2.64E-01 |
| RTN3     | -0.33 | 6.28E-01 | -0.79 | 7.86E-01 | -0.48 | 6.84E-01 |
| RBM28    | -0.33 | 6.28E-01 | -0.36 | 6.42E-01 | 0.68  | 2.48E-01 |
| CDK9     | -0.33 | 6.28E-01 | -1.31 | 9.05E-01 | 1.13  | 1.29E-01 |
| PNPO     | -0.33 | 6.28E-01 | 0.27  | 3.94E-01 | 1.17  | 1.20E-01 |
| KIAA0754 | -0.33 | 6.28E-01 | 0.66  | 2.55E-01 | -0.94 | 8.26E-01 |
| C3AR1    | -0.33 | 6.28E-01 | 0.87  | 1.92E-01 | -1.68 | 9.53E-01 |
| RPA3     | -0.33 | 6.28E-01 | -1.25 | 8.94E-01 | 0.73  | 2.34E-01 |
| TMEM100  | -0.33 | 6.28E-01 | -0.54 | 7.06E-01 | -0.07 | 5.26E-01 |
| TNFAIP2  | -0.33 | 6.28E-01 | 0.41  | 3.41E-01 | -0.55 | 7.07E-01 |
| FBXO28   | -0.33 | 6.28E-01 | -0.61 | 7.30E-01 | -0.03 | 5.11E-01 |
| HAO1     | -0.33 | 6.28E-01 | -0.94 | 8.25E-01 | 0.10  | 4.62E-01 |
| KIAA0408 | -0.33 | 6.28E-01 | -1.00 | 8.42E-01 | -0.29 | 6.14E-01 |
| KCNJ9    | -0.33 | 6.28E-01 | -1.43 | 9.24E-01 | 0.15  | 4.39E-01 |
| NOP16    | -0.33 | 6.28E-01 | -0.57 | 7.15E-01 | -0.74 | 7.70E-01 |
| KCNC2    | -0.33 | 6.28E-01 | 0.26  | 3.98E-01 | 0.17  | 4.34E-01 |
| MAP1LC3B | -0.33 | 6.28E-01 | 0.26  | 3.98E-01 | -1.33 | 9.08E-01 |
| FAM181B  | -0.33 | 6.28E-01 | -0.42 | 6.61E-01 | 0.73  | 2.32E-01 |
| OR10H2   | -0.33 | 6.28E-01 | 0.14  | 4.44E-01 | -1.31 | 9.05E-01 |
| SPATA12  | -0.33 | 6.28E-01 | 0.07  | 4.71E-01 | -0.93 | 8.23E-01 |
| INHBC    | -0.33 | 6.28E-01 | -1.17 | 8.78E-01 | 0.55  | 2.91E-01 |
| DERA     | -0.33 | 6.29E-01 | -0.18 | 5.71E-01 | -0.45 | 6.73E-01 |
| LENG8    | -0.33 | 6.29E-01 | 0.29  | 3.85E-01 | -1.17 | 8.80E-01 |
| TBC1D10A | -0.33 | 6.29E-01 | 0.85  | 1.97E-01 | -2.30 | 9.89E-01 |
| FBN3     | -0.33 | 6.29E-01 | 0.44  | 3.29E-01 | -0.38 | 6.47E-01 |
| S100A3   | -0.33 | 6.29E-01 | 0.20  | 4.22E-01 | 0.99  | 1.62E-01 |



|              |       |          |       |          |       |          |
|--------------|-------|----------|-------|----------|-------|----------|
| C4orf47      | -0.33 | 6.29E-01 | -0.05 | 5.21E-01 | -1.15 | 8.74E-01 |
| DSCR4        | -0.33 | 6.29E-01 | -0.30 | 6.19E-01 | -0.34 | 6.33E-01 |
| GPRC5D       | -0.33 | 6.29E-01 | 0.07  | 4.72E-01 | -0.80 | 7.87E-01 |
| EVX1         | -0.33 | 6.29E-01 | -0.83 | 7.98E-01 | -1.06 | 8.55E-01 |
| MAPK8IP3     | -0.33 | 6.29E-01 | -0.51 | 6.93E-01 | -0.22 | 5.85E-01 |
| RHBDF2       | -0.33 | 6.29E-01 | -0.23 | 5.89E-01 | -1.24 | 8.93E-01 |
| MFSD1        | -0.33 | 6.29E-01 | 0.62  | 2.69E-01 | -0.05 | 5.21E-01 |
| KRTAP4-1     | -0.33 | 6.29E-01 | -0.05 | 5.21E-01 | -1.42 | 9.22E-01 |
| CHAC1        | -0.33 | 6.29E-01 | -0.17 | 5.66E-01 | -1.13 | 8.71E-01 |
| POLR1C       | -0.33 | 6.29E-01 | -0.90 | 8.17E-01 | -0.46 | 6.76E-01 |
| TMEM173      | -0.33 | 6.29E-01 | -1.11 | 8.66E-01 | 0.21  | 4.15E-01 |
| C8orf46      | -0.33 | 6.29E-01 | -0.04 | 5.16E-01 | -0.29 | 6.13E-01 |
| C5orf54      | -0.33 | 6.29E-01 | 0.39  | 3.49E-01 | 0.65  | 2.58E-01 |
| KLK4         | -0.33 | 6.29E-01 | -0.24 | 5.94E-01 | -0.75 | 7.73E-01 |
| BBS12        | -0.33 | 6.29E-01 | -0.71 | 7.60E-01 | 0.77  | 2.22E-01 |
| ZSCAN5C      | -0.33 | 6.29E-01 | -0.45 | 6.73E-01 | -0.07 | 5.26E-01 |
| ISCU         | -0.33 | 6.30E-01 | -0.05 | 5.18E-01 | -0.22 | 5.87E-01 |
| EGR3         | -0.33 | 6.30E-01 | 0.06  | 4.75E-01 | -0.66 | 7.46E-01 |
| RP11-362K2.2 | -0.33 | 6.30E-01 | -0.16 | 5.64E-01 | -1.23 | 8.90E-01 |
| TUBB8        | -0.33 | 6.30E-01 | -1.49 | 9.31E-01 | 0.91  | 1.82E-01 |
| C1GALT1      | -0.33 | 6.30E-01 | -0.49 | 6.88E-01 | 0.45  | 3.25E-01 |
| AP002884.2   | -0.33 | 6.30E-01 | -0.44 | 6.70E-01 | -0.66 | 7.44E-01 |
| OPRD1        | -0.33 | 6.30E-01 | 0.95  | 1.71E-01 | -0.47 | 6.81E-01 |
| OR2V1        | -0.33 | 6.30E-01 | 0.61  | 2.70E-01 | -0.11 | 5.45E-01 |
| KIFAP3       | -0.33 | 6.30E-01 | 2.00  | 2.25E-02 | 0.75  | 2.27E-01 |
| NXF1         | -0.33 | 6.30E-01 | 0.23  | 4.07E-01 | -0.94 | 8.26E-01 |
| FBN1         | -0.33 | 6.30E-01 | -0.07 | 5.27E-01 | -1.56 | 9.40E-01 |
| CLEC7A       | -0.33 | 6.30E-01 | -0.21 | 5.82E-01 | -0.24 | 5.95E-01 |
| CEP68        | -0.33 | 6.30E-01 | -1.03 | 8.48E-01 | 0.07  | 4.74E-01 |
| ZBTB2        | -0.33 | 6.30E-01 | 0.07  | 4.72E-01 | 1.35  | 8.77E-02 |
| LMX1A        | -0.33 | 6.30E-01 | 1.60  | 5.50E-02 | 0.57  | 2.86E-01 |

|           |       |          |       |          |       |          |
|-----------|-------|----------|-------|----------|-------|----------|
| TEX38     | -0.33 | 6.30E-01 | -0.87 | 8.08E-01 | -0.35 | 6.38E-01 |
| SDPR      | -0.33 | 6.30E-01 | -0.11 | 5.42E-01 | -0.98 | 8.37E-01 |
| PODXL     | -0.33 | 6.30E-01 | -0.46 | 6.76E-01 | -0.43 | 6.66E-01 |
| USP5      | -0.33 | 6.31E-01 | -0.44 | 6.70E-01 | 0.41  | 3.42E-01 |
| SYNE3     | -0.33 | 6.31E-01 | -0.58 | 7.18E-01 | 0.15  | 4.38E-01 |
| TNFRSF6B  | -0.33 | 6.31E-01 | 0.59  | 2.79E-01 | 0.70  | 2.41E-01 |
| TTC9C     | -0.33 | 6.31E-01 | -0.33 | 6.30E-01 | -0.85 | 8.02E-01 |
| BATF      | -0.33 | 6.31E-01 | -1.44 | 9.25E-01 | 0.06  | 4.75E-01 |
| SLC28A1   | -0.33 | 6.31E-01 | 0.02  | 4.93E-01 | -0.35 | 6.35E-01 |
| OXNAD1    | -0.33 | 6.31E-01 | -0.02 | 5.08E-01 | -0.15 | 5.59E-01 |
| NRTN      | -0.33 | 6.31E-01 | 0.05  | 4.80E-01 | -0.26 | 6.01E-01 |
| TECR      | -0.33 | 6.31E-01 | -1.51 | 9.35E-01 | 0.21  | 4.18E-01 |
| NMUR1     | -0.33 | 6.31E-01 | 1.48  | 7.01E-02 | 2.45  | 7.19E-03 |
| MOGAT1    | -0.33 | 6.31E-01 | 0.20  | 4.20E-01 | 0.81  | 2.10E-01 |
| USP21     | -0.33 | 6.31E-01 | 1.35  | 8.85E-02 | 0.92  | 1.79E-01 |
| CCT3      | -0.33 | 6.31E-01 | 0.21  | 4.19E-01 | -0.91 | 8.19E-01 |
| BEST2     | -0.33 | 6.31E-01 | -0.59 | 7.22E-01 | 0.85  | 1.99E-01 |
| PHKB      | -0.33 | 6.31E-01 | -0.29 | 6.16E-01 | -0.21 | 5.82E-01 |
| SLC18A1   | -0.33 | 6.31E-01 | -0.23 | 5.91E-01 | -1.06 | 8.56E-01 |
| PTPN6     | -0.33 | 6.31E-01 | -0.36 | 6.41E-01 | -0.27 | 6.05E-01 |
| MTRNR2L12 | -0.34 | 6.31E-01 | -1.47 | 9.29E-01 | 0.28  | 3.88E-01 |
| SMARCAD1  | -0.34 | 6.31E-01 | 0.84  | 2.00E-01 | 1.65  | 4.96E-02 |
| MIXL1     | -0.34 | 6.31E-01 | -0.28 | 6.11E-01 | 0.43  | 3.32E-01 |
| CUL4A     | -0.34 | 6.31E-01 | -0.06 | 5.26E-01 | -0.59 | 7.22E-01 |
| ADPRH     | -0.34 | 6.31E-01 | -0.85 | 8.02E-01 | -0.41 | 6.61E-01 |
| EWSR1     | -0.34 | 6.31E-01 | 0.43  | 3.34E-01 | -1.34 | 9.09E-01 |
| TMEM114   | -0.34 | 6.31E-01 | 0.87  | 1.91E-01 | -0.12 | 5.46E-01 |
| PLEKHG4   | -0.34 | 6.32E-01 | -1.46 | 9.28E-01 | 0.16  | 4.37E-01 |
| MAP7      | -0.34 | 6.32E-01 | 0.31  | 3.79E-01 | 0.12  | 4.54E-01 |
| RCBTB2    | -0.34 | 6.32E-01 | -1.40 | 9.19E-01 | 0.48  | 3.17E-01 |
| FSIP1     | -0.34 | 6.32E-01 | 0.56  | 2.86E-01 | -0.47 | 6.81E-01 |

|          |       |          |       |          |       |          |
|----------|-------|----------|-------|----------|-------|----------|
| GHITM    | -0.34 | 6.32E-01 | -1.33 | 9.08E-01 | -0.16 | 5.65E-01 |
| ATP6V0A2 | -0.34 | 6.32E-01 | 0.67  | 2.51E-01 | 1.07  | 1.41E-01 |
| GNLY     | -0.34 | 6.32E-01 | -0.06 | 5.24E-01 | 0.14  | 4.45E-01 |
| PNOC     | -0.34 | 6.32E-01 | 1.32  | 9.27E-02 | 0.86  | 1.96E-01 |
| SNRNP25  | -0.34 | 6.32E-01 | -0.50 | 6.91E-01 | -0.84 | 8.01E-01 |
| C17orf72 | -0.34 | 6.32E-01 | 0.16  | 4.37E-01 | -1.61 | 9.46E-01 |
| LCE2D    | -0.34 | 6.32E-01 | -0.66 | 7.45E-01 | 0.02  | 4.94E-01 |
| PPM1E    | -0.34 | 6.32E-01 | 0.80  | 2.11E-01 | -0.15 | 5.61E-01 |
| SELPLG   | -0.34 | 6.32E-01 | -0.02 | 5.07E-01 | -0.16 | 5.64E-01 |
| GPN2     | -0.34 | 6.32E-01 | 0.01  | 4.97E-01 | 2.01  | 2.22E-02 |
| CAPN13   | -0.34 | 6.32E-01 | 1.73  | 4.18E-02 | -0.32 | 6.24E-01 |
| EGFL7    | -0.34 | 6.32E-01 | -0.88 | 8.10E-01 | -0.03 | 5.12E-01 |
| C11orf53 | -0.34 | 6.32E-01 | -0.02 | 5.10E-01 | 0.30  | 3.81E-01 |
| ACSM1    | -0.34 | 6.32E-01 | 0.33  | 3.72E-01 | 0.07  | 4.71E-01 |
| PRSS50   | -0.34 | 6.32E-01 | -1.53 | 9.37E-01 | 0.16  | 4.37E-01 |
| EMP2     | -0.34 | 6.32E-01 | 0.46  | 3.24E-01 | -1.08 | 8.59E-01 |
| IVD      | -0.34 | 6.32E-01 | -0.15 | 5.58E-01 | 0.44  | 3.32E-01 |
| LIF      | -0.34 | 6.32E-01 | -0.38 | 6.48E-01 | 1.20  | 1.14E-01 |
| RANBP6   | -0.34 | 6.33E-01 | 0.25  | 4.00E-01 | 0.08  | 4.68E-01 |
| NCF2     | -0.34 | 6.33E-01 | 0.30  | 3.83E-01 | 1.78  | 3.74E-02 |
| UNC13D   | -0.34 | 6.33E-01 | 0.08  | 4.69E-01 | 1.32  | 9.31E-02 |
| SMEK2    | -0.34 | 6.33E-01 | 1.04  | 1.50E-01 | -0.91 | 8.18E-01 |
| ZNF584   | -0.34 | 6.33E-01 | -0.16 | 5.65E-01 | -0.39 | 6.52E-01 |
| YME1L1   | -0.34 | 6.33E-01 | -1.56 | 9.40E-01 | 0.61  | 2.71E-01 |
| ACVR2A   | -0.34 | 6.33E-01 | 0.53  | 2.97E-01 | 2.20  | 1.39E-02 |
| LZTR1    | -0.34 | 6.33E-01 | -0.38 | 6.46E-01 | -1.88 | 9.70E-01 |
| MSH6     | -0.34 | 6.33E-01 | -0.06 | 5.23E-01 | -0.68 | 7.52E-01 |
| POLR3F   | -0.34 | 6.33E-01 | -0.79 | 7.84E-01 | 0.00  | 4.98E-01 |
| MTX2     | -0.34 | 6.33E-01 | 1.37  | 8.60E-02 | 2.75  | 2.95E-03 |
| CCDC82   | -0.34 | 6.33E-01 | -1.01 | 8.44E-01 | 1.50  | 6.69E-02 |
| OR52A5   | -0.34 | 6.33E-01 | 0.13  | 4.48E-01 | -1.62 | 9.47E-01 |

|          |       |          |       |          |       |          |
|----------|-------|----------|-------|----------|-------|----------|
| ATP6V0E2 | -0.34 | 6.33E-01 | -0.13 | 5.50E-01 | -1.06 | 8.56E-01 |
| FAM160B1 | -0.34 | 6.34E-01 | -0.12 | 5.46E-01 | 1.67  | 4.76E-02 |
| TEX261   | -0.34 | 6.34E-01 | 0.01  | 4.97E-01 | -0.87 | 8.07E-01 |
| SYCE2    | -0.34 | 6.34E-01 | -0.85 | 8.02E-01 | 0.88  | 1.91E-01 |
| TBRG4    | -0.34 | 6.34E-01 | 1.37  | 8.60E-02 | 0.75  | 2.26E-01 |
| CLLU1OS  | -0.34 | 6.34E-01 | -0.06 | 5.25E-01 | 0.12  | 4.53E-01 |
| KARS     | -0.34 | 6.34E-01 | -0.39 | 6.54E-01 | 0.07  | 4.74E-01 |
| EFHB     | -0.34 | 6.34E-01 | 0.90  | 1.84E-01 | 0.68  | 2.47E-01 |
| PRAMEF12 | -0.34 | 6.34E-01 | 0.39  | 3.48E-01 | 1.30  | 9.74E-02 |
| SIGLEC15 | -0.34 | 6.34E-01 | 0.02  | 4.92E-01 | -0.07 | 5.29E-01 |
| ZNF440   | -0.34 | 6.34E-01 | -0.20 | 5.79E-01 | -0.51 | 6.94E-01 |
| CIB1     | -0.34 | 6.34E-01 | -1.07 | 8.58E-01 | -0.74 | 7.70E-01 |
| PIP5K1B  | -0.34 | 6.34E-01 | 0.53  | 2.99E-01 | -1.69 | 9.54E-01 |
| MRPS35   | -0.34 | 6.34E-01 | 0.21  | 4.17E-01 | 0.26  | 3.97E-01 |
| NSG2     | -0.34 | 6.34E-01 | 0.68  | 2.49E-01 | 0.44  | 3.31E-01 |
| HOXA7    | -0.34 | 6.34E-01 | 0.17  | 4.32E-01 | 0.48  | 3.16E-01 |
| LRRC28   | -0.34 | 6.34E-01 | 0.02  | 4.90E-01 | -0.30 | 6.17E-01 |
| LMBR1    | -0.34 | 6.34E-01 | -0.64 | 7.40E-01 | 0.00  | 5.00E-01 |
| EDF1     | -0.34 | 6.34E-01 | 1.00  | 1.57E-01 | -0.32 | 6.24E-01 |
| BNIP3L   | -0.34 | 6.35E-01 | 0.16  | 4.36E-01 | -0.09 | 5.36E-01 |
| EFNA3    | -0.34 | 6.35E-01 | 0.29  | 3.87E-01 | -1.19 | 8.84E-01 |
| GZMA     | -0.34 | 6.35E-01 | -0.12 | 5.48E-01 | 0.30  | 3.83E-01 |
| ATP8B4   | -0.34 | 6.35E-01 | -0.34 | 6.34E-01 | -1.66 | 9.51E-01 |
| CD36     | -0.34 | 6.35E-01 | -1.17 | 8.79E-01 | -0.26 | 6.03E-01 |
| PTCD3    | -0.34 | 6.35E-01 | -1.03 | 8.48E-01 | 0.75  | 2.28E-01 |
| OGN      | -0.34 | 6.35E-01 | 0.31  | 3.78E-01 | -1.73 | 9.58E-01 |
| YAP1     | -0.34 | 6.35E-01 | 0.17  | 4.32E-01 | -0.33 | 6.28E-01 |
| GSDMA    | -0.34 | 6.35E-01 | -1.06 | 8.56E-01 | -0.17 | 5.69E-01 |
| CCL15    | -0.34 | 6.35E-01 | 1.63  | 5.16E-02 | -0.38 | 6.47E-01 |
| E2F4     | -0.34 | 6.35E-01 | -0.61 | 7.29E-01 | -0.68 | 7.50E-01 |
| TMTC1    | -0.34 | 6.35E-01 | -0.52 | 7.00E-01 | 0.93  | 1.76E-01 |

|          |       |          |       |          |       |          |
|----------|-------|----------|-------|----------|-------|----------|
| CHST15   | -0.35 | 6.35E-01 | -0.65 | 7.42E-01 | 0.10  | 4.59E-01 |
| NEB      | -0.35 | 6.35E-01 | -0.09 | 5.34E-01 | 0.03  | 4.88E-01 |
| MT1F     | -0.35 | 6.35E-01 | 0.60  | 2.74E-01 | -2.29 | 9.89E-01 |
| SLC35E4  | -0.35 | 6.35E-01 | -0.16 | 5.64E-01 | -0.37 | 6.43E-01 |
| DDX55    | -0.35 | 6.35E-01 | 0.19  | 4.24E-01 | 1.24  | 1.08E-01 |
| PIGG     | -0.35 | 6.35E-01 | -0.29 | 6.15E-01 | 0.78  | 2.19E-01 |
| TCF3     | -0.35 | 6.35E-01 | -1.19 | 8.84E-01 | 0.49  | 3.13E-01 |
| DSG4     | -0.35 | 6.35E-01 | 0.23  | 4.08E-01 | -0.95 | 8.29E-01 |
| TANGO6   | -0.35 | 6.35E-01 | -0.32 | 6.27E-01 | -0.34 | 6.34E-01 |
| BRINP3   | -0.35 | 6.35E-01 | -0.21 | 5.85E-01 | -0.55 | 7.08E-01 |
| FBRSL1   | -0.35 | 6.36E-01 | 0.91  | 1.82E-01 | -0.37 | 6.46E-01 |
| WFS1     | -0.35 | 6.36E-01 | 0.33  | 3.70E-01 | -0.41 | 6.60E-01 |
| MBL2     | -0.35 | 6.36E-01 | 0.49  | 3.13E-01 | -0.36 | 6.41E-01 |
| RASSF9   | -0.35 | 6.36E-01 | -0.53 | 7.03E-01 | 1.54  | 6.15E-02 |
| SPIB     | -0.35 | 6.36E-01 | -0.77 | 7.80E-01 | 0.35  | 3.61E-01 |
| GSTO2    | -0.35 | 6.36E-01 | -0.47 | 6.80E-01 | -0.07 | 5.27E-01 |
| KRT81    | -0.35 | 6.36E-01 | 0.06  | 4.74E-01 | -1.49 | 9.32E-01 |
| CYB5R3   | -0.35 | 6.36E-01 | -0.32 | 6.26E-01 | 0.26  | 3.96E-01 |
| EPB41L4B | -0.35 | 6.36E-01 | -0.07 | 5.28E-01 | -0.21 | 5.84E-01 |
| ERF      | -0.35 | 6.36E-01 | 0.12  | 4.53E-01 | 0.10  | 4.61E-01 |
| MPP2     | -0.35 | 6.36E-01 | 0.26  | 3.96E-01 | -0.77 | 7.80E-01 |
| KIAA0947 | -0.35 | 6.36E-01 | -1.45 | 9.27E-01 | 0.75  | 2.26E-01 |
| AGR2     | -0.35 | 6.36E-01 | 0.96  | 1.69E-01 | 0.36  | 3.59E-01 |
| B4GALT5  | -0.35 | 6.36E-01 | -1.43 | 9.24E-01 | 0.07  | 4.71E-01 |
| C10orf82 | -0.35 | 6.36E-01 | -0.09 | 5.37E-01 | -0.18 | 5.71E-01 |
| MCM2     | -0.35 | 6.36E-01 | -0.39 | 6.52E-01 | -0.61 | 7.29E-01 |
| AUP1     | -0.35 | 6.36E-01 | -1.14 | 8.72E-01 | -0.20 | 5.81E-01 |
| COMTD1   | -0.35 | 6.36E-01 | 0.17  | 4.33E-01 | 0.45  | 3.27E-01 |
| A3GALT2  | -0.35 | 6.36E-01 | 0.21  | 4.17E-01 | 0.70  | 2.42E-01 |
| SLC28A2  | -0.35 | 6.36E-01 | -0.40 | 6.56E-01 | -0.85 | 8.02E-01 |
| SLC36A1  | -0.35 | 6.36E-01 | -0.02 | 5.07E-01 | 1.85  | 3.20E-02 |

|              |       |          |       |          |       |          |
|--------------|-------|----------|-------|----------|-------|----------|
| MSR1         | -0.35 | 6.36E-01 | -1.34 | 9.10E-01 | 1.60  | 5.44E-02 |
| HIST3H3      | -0.35 | 6.37E-01 | -0.54 | 7.06E-01 | 1.02  | 1.54E-01 |
| SAA4         | -0.35 | 6.37E-01 | 0.31  | 3.79E-01 | -0.49 | 6.90E-01 |
| CYP11A1      | -0.35 | 6.37E-01 | -0.53 | 7.01E-01 | 0.04  | 4.85E-01 |
| RP11-47122.3 | -0.35 | 6.37E-01 | -0.64 | 7.39E-01 | -1.04 | 8.50E-01 |
| CELA2A       | -0.35 | 6.37E-01 | -0.63 | 7.36E-01 | 0.03  | 4.87E-01 |
| ATN1         | -0.35 | 6.37E-01 | -0.89 | 8.13E-01 | -0.18 | 5.70E-01 |
| CWC22        | -0.35 | 6.37E-01 | 0.59  | 2.77E-01 | -0.20 | 5.80E-01 |
| ZNF395       | -0.35 | 6.37E-01 | 0.84  | 2.00E-01 | 0.20  | 4.20E-01 |
| RAD18        | -0.35 | 6.37E-01 | -0.31 | 6.21E-01 | -0.21 | 5.85E-01 |
| DZIP1        | -0.35 | 6.37E-01 | -0.75 | 7.74E-01 | 0.39  | 3.47E-01 |
| MAN2C1       | -0.35 | 6.37E-01 | -0.56 | 7.13E-01 | -1.18 | 8.82E-01 |
| ERP29        | -0.35 | 6.37E-01 | -1.14 | 8.73E-01 | 0.19  | 4.25E-01 |
| FANK1        | -0.35 | 6.37E-01 | -0.79 | 7.85E-01 | -0.36 | 6.41E-01 |
| CYP7B1       | -0.35 | 6.37E-01 | -1.04 | 8.51E-01 | -0.98 | 8.37E-01 |
| IL1A         | -0.35 | 6.37E-01 | -1.49 | 9.32E-01 | 0.03  | 4.86E-01 |
| CAPN15       | -0.35 | 6.37E-01 | -0.91 | 8.18E-01 | 0.79  | 2.16E-01 |
| NR1D1        | -0.35 | 6.37E-01 | 0.41  | 3.40E-01 | -1.18 | 8.81E-01 |
| TAX1BP1      | -0.35 | 6.37E-01 | 0.23  | 4.09E-01 | 0.48  | 3.17E-01 |
| CTCF         | -0.35 | 6.37E-01 | -1.42 | 9.23E-01 | 0.13  | 4.50E-01 |
| TCHP         | -0.35 | 6.37E-01 | -1.68 | 9.54E-01 | -0.03 | 5.13E-01 |
| RNPS1        | -0.35 | 6.37E-01 | -0.03 | 5.14E-01 | -1.12 | 8.69E-01 |
| GYPE         | -0.35 | 6.37E-01 | 0.61  | 2.70E-01 | -0.16 | 5.64E-01 |
| ACTL9        | -0.35 | 6.37E-01 | -0.14 | 5.57E-01 | -0.30 | 6.17E-01 |
| BCO2         | -0.35 | 6.38E-01 | -0.49 | 6.87E-01 | -0.12 | 5.47E-01 |
| CRTC2        | -0.35 | 6.38E-01 | 0.38  | 3.52E-01 | 1.52  | 6.36E-02 |
| SLC25A41     | -0.35 | 6.38E-01 | -1.53 | 9.38E-01 | 0.99  | 1.60E-01 |
| UCMA         | -0.35 | 6.38E-01 | -0.17 | 5.69E-01 | -0.75 | 7.74E-01 |
| SPATA16      | -0.35 | 6.38E-01 | -1.42 | 9.22E-01 | 1.23  | 1.10E-01 |
| CTDNEP1      | -0.35 | 6.38E-01 | -0.63 | 7.35E-01 | -0.68 | 7.52E-01 |
| C18orf56     | -0.35 | 6.38E-01 | 1.37  | 8.56E-02 | -0.67 | 7.49E-01 |

|             |       |          |       |          |       |          |
|-------------|-------|----------|-------|----------|-------|----------|
| SCN9A       | -0.35 | 6.38E-01 | 0.61  | 2.72E-01 | 0.22  | 4.15E-01 |
| SPRED3      | -0.35 | 6.38E-01 | -0.02 | 5.06E-01 | -0.75 | 7.74E-01 |
| UBE3D       | -0.35 | 6.38E-01 | -0.97 | 8.35E-01 | 0.88  | 1.89E-01 |
| ZNF418      | -0.35 | 6.38E-01 | 0.47  | 3.20E-01 | -0.40 | 6.57E-01 |
| CSF2        | -0.35 | 6.38E-01 | -0.45 | 6.75E-01 | -0.20 | 5.77E-01 |
| NPEPPS      | -0.35 | 6.38E-01 | 0.52  | 3.00E-01 | 1.76  | 3.93E-02 |
| GPI         | -0.35 | 6.38E-01 | 0.87  | 1.91E-01 | -0.20 | 5.79E-01 |
| SKP2        | -0.35 | 6.38E-01 | -0.98 | 8.37E-01 | -0.45 | 6.73E-01 |
| CPO         | -0.35 | 6.38E-01 | 0.54  | 2.96E-01 | -1.61 | 9.47E-01 |
| ASPM        | -0.35 | 6.38E-01 | -1.00 | 8.41E-01 | -0.31 | 6.21E-01 |
| FBXO40      | -0.35 | 6.38E-01 | -0.50 | 6.91E-01 | -1.50 | 9.34E-01 |
| KDSR        | -0.35 | 6.38E-01 | -0.98 | 8.37E-01 | -0.16 | 5.65E-01 |
| CEACAM5     | -0.35 | 6.39E-01 | 0.25  | 4.02E-01 | -0.60 | 7.25E-01 |
| TUSC1       | -0.35 | 6.39E-01 | -0.85 | 8.03E-01 | -0.38 | 6.49E-01 |
| HIF1A       | -0.35 | 6.39E-01 | -0.45 | 6.72E-01 | -0.97 | 8.33E-01 |
| SOX7        | -0.35 | 6.39E-01 | -0.10 | 5.38E-01 | 0.45  | 3.26E-01 |
| FAM98C      | -0.35 | 6.39E-01 | 0.02  | 4.93E-01 | -1.14 | 8.73E-01 |
| C12orf74    | -0.36 | 6.39E-01 | 0.29  | 3.86E-01 | -0.77 | 7.80E-01 |
| UBAP1       | -0.36 | 6.39E-01 | -0.87 | 8.08E-01 | 0.11  | 4.56E-01 |
| CCDC47      | -0.36 | 6.39E-01 | -0.64 | 7.39E-01 | -1.14 | 8.73E-01 |
| IFNL1       | -0.36 | 6.39E-01 | -1.36 | 9.13E-01 | 0.01  | 4.97E-01 |
| FAM46A      | -0.36 | 6.39E-01 | -1.25 | 8.94E-01 | 0.39  | 3.48E-01 |
| GPCPD1      | -0.36 | 6.39E-01 | -0.78 | 7.83E-01 | -0.03 | 5.13E-01 |
| DYNC1H1     | -0.36 | 6.39E-01 | -0.70 | 7.57E-01 | 1.07  | 1.42E-01 |
| AC006946.15 | -0.36 | 6.39E-01 | -1.37 | 9.14E-01 | 0.99  | 1.61E-01 |
| LLGL1       | -0.36 | 6.39E-01 | -0.07 | 5.27E-01 | -0.53 | 7.03E-01 |
| OPRM1       | -0.36 | 6.39E-01 | -0.41 | 6.61E-01 | 0.56  | 2.89E-01 |
| ELN         | -0.36 | 6.39E-01 | -0.45 | 6.74E-01 | 1.21  | 1.14E-01 |
| GEM         | -0.36 | 6.40E-01 | -0.43 | 6.65E-01 | -0.34 | 6.34E-01 |
| C16orf46    | -0.36 | 6.40E-01 | -0.86 | 8.04E-01 | -0.21 | 5.82E-01 |
| IL10RB      | -0.36 | 6.40E-01 | -0.46 | 6.79E-01 | -1.10 | 8.65E-01 |

|           |       |          |       |          |       |          |
|-----------|-------|----------|-------|----------|-------|----------|
| MMP2      | -0.36 | 6.40E-01 | -1.92 | 9.73E-01 | -0.50 | 6.91E-01 |
| KRTAP12-1 | -0.36 | 6.40E-01 | 0.02  | 4.94E-01 | 0.69  | 2.44E-01 |
| GIMAP1    | -0.36 | 6.40E-01 | -0.72 | 7.65E-01 | -0.68 | 7.52E-01 |
| EFNA1     | -0.36 | 6.40E-01 | -0.92 | 8.20E-01 | -0.42 | 6.64E-01 |
| SLAMF7    | -0.36 | 6.40E-01 | -0.12 | 5.47E-01 | -0.27 | 6.05E-01 |
| MRPS31    | -0.36 | 6.40E-01 | 0.62  | 2.69E-01 | -0.83 | 7.96E-01 |
| SLC6A12   | -0.36 | 6.40E-01 | -0.41 | 6.59E-01 | 0.25  | 4.03E-01 |
| SCGB3A1   | -0.36 | 6.40E-01 | -1.07 | 8.57E-01 | -0.07 | 5.28E-01 |
| ZFP37     | -0.36 | 6.40E-01 | -1.13 | 8.72E-01 | -0.40 | 6.54E-01 |
| GTF2I     | -0.36 | 6.40E-01 | -0.87 | 8.07E-01 | -0.32 | 6.24E-01 |
| CDC34     | -0.36 | 6.40E-01 | -1.38 | 9.16E-01 | -0.27 | 6.08E-01 |
| AEN       | -0.36 | 6.40E-01 | -1.65 | 9.50E-01 | 0.17  | 4.32E-01 |
| ITPRIPL1  | -0.36 | 6.40E-01 | 0.04  | 4.85E-01 | -1.95 | 9.74E-01 |
| RTF1      | -0.36 | 6.40E-01 | -0.17 | 5.68E-01 | -1.90 | 9.71E-01 |
| MYD88     | -0.36 | 6.40E-01 | -1.06 | 8.55E-01 | -0.24 | 5.93E-01 |
| CLGN      | -0.36 | 6.40E-01 | 0.07  | 4.73E-01 | -1.80 | 9.64E-01 |
| EIF6      | -0.36 | 6.40E-01 | -1.00 | 8.42E-01 | -0.26 | 6.04E-01 |
| SFXN3     | -0.36 | 6.40E-01 | -0.16 | 5.63E-01 | 0.48  | 3.16E-01 |
| DNAJB1    | -0.36 | 6.40E-01 | -1.35 | 9.11E-01 | 0.08  | 4.67E-01 |
| KDM2A     | -0.36 | 6.40E-01 | 1.20  | 1.16E-01 | -0.29 | 6.16E-01 |
| NEDD8     | -0.36 | 6.40E-01 | -0.04 | 5.17E-01 | 0.63  | 2.65E-01 |
| EAF1      | -0.36 | 6.41E-01 | -0.01 | 5.05E-01 | -1.17 | 8.80E-01 |
| KIAA1217  | -0.36 | 6.41E-01 | 2.19  | 1.42E-02 | 0.51  | 3.06E-01 |
| COMMD5    | -0.36 | 6.41E-01 | -0.32 | 6.25E-01 | -1.86 | 9.69E-01 |
| CDC14B    | -0.36 | 6.41E-01 | -1.43 | 9.23E-01 | 0.86  | 1.95E-01 |
| ZSCAN4    | -0.36 | 6.41E-01 | 0.31  | 3.80E-01 | -0.05 | 5.20E-01 |
| FAM213B   | -0.36 | 6.41E-01 | -0.16 | 5.65E-01 | 0.21  | 4.15E-01 |
| ZNF559    | -0.36 | 6.41E-01 | -1.16 | 8.77E-01 | -0.09 | 5.38E-01 |
| DSG3      | -0.36 | 6.41E-01 | 0.04  | 4.83E-01 | -0.78 | 7.82E-01 |
| METTL6    | -0.36 | 6.41E-01 | 0.00  | 4.98E-01 | -1.10 | 8.64E-01 |
| ARHGAP18  | -0.36 | 6.41E-01 | 0.52  | 3.00E-01 | -0.71 | 7.62E-01 |



|              |       |          |       |          |       |          |
|--------------|-------|----------|-------|----------|-------|----------|
| MORN2        | -0.36 | 6.41E-01 | -0.01 | 5.05E-01 | -0.36 | 6.40E-01 |
| SOX7         | -0.36 | 6.41E-01 | -0.13 | 5.53E-01 | 0.46  | 3.23E-01 |
| DMRT3        | -0.36 | 6.41E-01 | -0.39 | 6.53E-01 | -0.41 | 6.60E-01 |
| ANKFY1       | -0.36 | 6.41E-01 | -0.22 | 5.87E-01 | -0.32 | 6.24E-01 |
| CLDN18       | -0.36 | 6.41E-01 | -0.28 | 6.11E-01 | -0.61 | 7.28E-01 |
| KCNT2        | -0.36 | 6.41E-01 | 0.29  | 3.84E-01 | 0.93  | 1.77E-01 |
| CEP192       | -0.36 | 6.41E-01 | -0.13 | 5.52E-01 | -1.35 | 9.11E-01 |
| FAM92B       | -0.36 | 6.41E-01 | -0.50 | 6.92E-01 | -0.12 | 5.49E-01 |
| POMC         | -0.36 | 6.41E-01 | 0.25  | 4.03E-01 | 0.26  | 3.99E-01 |
| PDE12        | -0.36 | 6.41E-01 | -0.08 | 5.33E-01 | -0.67 | 7.47E-01 |
| TMEM14B      | -0.36 | 6.41E-01 | -0.05 | 5.21E-01 | 0.96  | 1.69E-01 |
| RP11-126K1.2 | -0.36 | 6.42E-01 | -0.50 | 6.90E-01 | -0.29 | 6.15E-01 |
| RPS21        | -0.36 | 6.42E-01 | -0.50 | 6.90E-01 | 1.57  | 5.80E-02 |
| TREH         | -0.36 | 6.42E-01 | 0.40  | 3.43E-01 | 1.45  | 7.41E-02 |
| TBC1D29      | -0.36 | 6.42E-01 | 1.02  | 1.53E-01 | 0.71  | 2.38E-01 |
| ADRA2B       | -0.36 | 6.42E-01 | -0.74 | 7.70E-01 | 0.35  | 3.64E-01 |
| INADL        | -0.36 | 6.42E-01 | 0.89  | 1.86E-01 | -0.73 | 7.67E-01 |
| LRRC31       | -0.36 | 6.42E-01 | 0.29  | 3.87E-01 | -0.02 | 5.08E-01 |
| TNK1         | -0.36 | 6.42E-01 | -0.35 | 6.38E-01 | -0.42 | 6.61E-01 |
| PTGS2        | -0.36 | 6.42E-01 | -0.82 | 7.94E-01 | -0.78 | 7.83E-01 |
| ZNF230       | -0.36 | 6.42E-01 | 0.55  | 2.90E-01 | -1.52 | 9.35E-01 |
| ZFP36        | -0.36 | 6.42E-01 | -1.17 | 8.79E-01 | 1.15  | 1.24E-01 |
| BHMT         | -0.36 | 6.42E-01 | -1.35 | 9.11E-01 | 0.42  | 3.38E-01 |
| C2orf27A     | -0.36 | 6.42E-01 | -0.05 | 5.19E-01 | 0.91  | 1.80E-01 |
| C6orf52      | -0.36 | 6.42E-01 | 0.18  | 4.28E-01 | -1.46 | 9.28E-01 |
| COMMD9       | -0.36 | 6.42E-01 | -0.52 | 6.98E-01 | -0.61 | 7.30E-01 |
| KATNB1       | -0.36 | 6.42E-01 | -0.53 | 7.03E-01 | -1.48 | 9.30E-01 |
| IRS1         | -0.36 | 6.42E-01 | 0.50  | 3.10E-01 | -1.84 | 9.67E-01 |
| GATA5        | -0.36 | 6.42E-01 | -1.50 | 9.33E-01 | -0.10 | 5.41E-01 |
| POFUT1       | -0.37 | 6.43E-01 | 0.58  | 2.82E-01 | 1.33  | 9.13E-02 |
| DNMT3B       | -0.37 | 6.43E-01 | -0.18 | 5.72E-01 | -1.32 | 9.07E-01 |

|           |       |          |       |          |       |          |
|-----------|-------|----------|-------|----------|-------|----------|
| RASGRF2   | -0.37 | 6.43E-01 | -0.56 | 7.12E-01 | 1.20  | 1.15E-01 |
| PRR15L    | -0.37 | 6.43E-01 | 0.54  | 2.93E-01 | 0.26  | 3.96E-01 |
| USP31     | -0.37 | 6.43E-01 | -0.06 | 5.25E-01 | -0.68 | 7.53E-01 |
| MYRIP     | -0.37 | 6.43E-01 | 0.55  | 2.91E-01 | -1.26 | 8.96E-01 |
| DNAJC8    | -0.37 | 6.43E-01 | -0.37 | 6.46E-01 | 0.82  | 2.05E-01 |
| CALM3     | -0.37 | 6.43E-01 | 0.04  | 4.84E-01 | -2.39 | 9.92E-01 |
| C2orf43   | -0.37 | 6.43E-01 | -0.66 | 7.44E-01 | -0.01 | 5.06E-01 |
| MMRN2     | -0.37 | 6.43E-01 | -0.54 | 7.04E-01 | 1.09  | 1.39E-01 |
| SLC15A3   | -0.37 | 6.43E-01 | -1.55 | 9.39E-01 | -0.88 | 8.10E-01 |
| KIDINS220 | -0.37 | 6.43E-01 | -0.35 | 6.38E-01 | -0.19 | 5.76E-01 |
| OLFML2A   | -0.37 | 6.43E-01 | -1.13 | 8.70E-01 | -0.10 | 5.41E-01 |
| CTSD      | -0.37 | 6.43E-01 | -1.35 | 9.12E-01 | -0.46 | 6.77E-01 |
| ERBB2IP   | -0.37 | 6.43E-01 | -0.04 | 5.15E-01 | -0.20 | 5.79E-01 |
| EPHB2     | -0.37 | 6.43E-01 | -0.25 | 6.00E-01 | -0.09 | 5.36E-01 |
| SFTPD     | -0.37 | 6.43E-01 | -0.32 | 6.25E-01 | 0.01  | 4.95E-01 |
| MCU       | -0.37 | 6.44E-01 | 1.12  | 1.31E-01 | -0.17 | 5.66E-01 |
| SLC25A13  | -0.37 | 6.44E-01 | -0.85 | 8.02E-01 | -0.09 | 5.37E-01 |
| MSH3      | -0.37 | 6.44E-01 | -0.67 | 7.48E-01 | -0.77 | 7.79E-01 |
| PIP4K2B   | -0.37 | 6.44E-01 | -0.07 | 5.29E-01 | -1.90 | 9.72E-01 |
| CCDC127   | -0.37 | 6.44E-01 | -0.89 | 8.15E-01 | 0.26  | 3.97E-01 |
| SP100     | -0.37 | 6.44E-01 | -2.27 | 9.88E-01 | 1.10  | 1.35E-01 |
| BAG1      | -0.37 | 6.44E-01 | 0.58  | 2.81E-01 | -0.84 | 7.99E-01 |
| FXVD4     | -0.37 | 6.44E-01 | 0.27  | 3.95E-01 | 1.17  | 1.20E-01 |
| CRKL      | -0.37 | 6.44E-01 | -0.61 | 7.28E-01 | 0.70  | 2.41E-01 |
| RAB26     | -0.37 | 6.44E-01 | -0.06 | 5.25E-01 | -0.80 | 7.88E-01 |
| TMEM91    | -0.37 | 6.44E-01 | 0.61  | 2.70E-01 | 0.70  | 2.41E-01 |
| LRRC57    | -0.37 | 6.44E-01 | 0.32  | 3.74E-01 | -2.19 | 9.86E-01 |
| TOX3      | -0.37 | 6.44E-01 | -1.24 | 8.92E-01 | -1.06 | 8.56E-01 |
| SH2D2A    | -0.37 | 6.44E-01 | -0.57 | 7.14E-01 | 1.13  | 1.29E-01 |
| TBKBP1    | -0.37 | 6.44E-01 | 0.58  | 2.82E-01 | 1.06  | 1.45E-01 |
| IL9       | -0.37 | 6.44E-01 | 0.01  | 4.96E-01 | -1.61 | 9.46E-01 |

|           |       |          |       |          |       |          |
|-----------|-------|----------|-------|----------|-------|----------|
| SLC5A9    | -0.37 | 6.44E-01 | 1.38  | 8.41E-02 | 0.17  | 4.32E-01 |
| KSR1      | -0.37 | 6.44E-01 | 0.45  | 3.25E-01 | -0.51 | 6.94E-01 |
| C21orf58  | -0.37 | 6.44E-01 | -1.09 | 8.63E-01 | 0.76  | 2.25E-01 |
| SEMA3E    | -0.37 | 6.44E-01 | 0.44  | 3.30E-01 | -1.59 | 9.44E-01 |
| HIF3A     | -0.37 | 6.44E-01 | -0.17 | 5.66E-01 | -1.78 | 9.62E-01 |
| CTIF      | -0.37 | 6.45E-01 | -0.34 | 6.32E-01 | 0.11  | 4.56E-01 |
| GCDH      | -0.37 | 6.45E-01 | -0.95 | 8.29E-01 | 0.73  | 2.31E-01 |
| MAEL      | -0.37 | 6.45E-01 | 0.19  | 4.25E-01 | -1.20 | 8.85E-01 |
| WNT4      | -0.37 | 6.45E-01 | -1.06 | 8.55E-01 | -0.25 | 5.98E-01 |
| NF1       | -0.37 | 6.45E-01 | 0.37  | 3.55E-01 | 1.45  | 7.35E-02 |
| XPO7      | -0.37 | 6.45E-01 | 0.35  | 3.64E-01 | -0.89 | 8.13E-01 |
| FGR       | -0.37 | 6.45E-01 | 0.46  | 3.24E-01 | -0.76 | 7.77E-01 |
| C20orf201 | -0.37 | 6.45E-01 | 0.53  | 2.98E-01 | -0.48 | 6.85E-01 |
| CKAP2     | -0.37 | 6.45E-01 | -0.50 | 6.90E-01 | 0.35  | 3.62E-01 |
| LYL1      | -0.37 | 6.45E-01 | -0.06 | 5.26E-01 | 0.33  | 3.70E-01 |
| APOB      | -0.37 | 6.45E-01 | -0.20 | 5.78E-01 | -0.95 | 8.30E-01 |
| AKAP7     | -0.37 | 6.45E-01 | -0.07 | 5.28E-01 | -0.50 | 6.92E-01 |
| WNT9A     | -0.37 | 6.45E-01 | 0.45  | 3.25E-01 | -0.35 | 6.37E-01 |
| LCN9      | -0.37 | 6.45E-01 | -0.90 | 8.16E-01 | -0.63 | 7.35E-01 |
| FGF20     | -0.37 | 6.45E-01 | 0.15  | 4.42E-01 | -0.44 | 6.70E-01 |
| C19orf40  | -0.37 | 6.45E-01 | 0.01  | 4.95E-01 | 0.63  | 2.64E-01 |
| SUGT1     | -0.37 | 6.45E-01 | -0.10 | 5.39E-01 | -0.19 | 5.74E-01 |
| DHRS7B    | -0.37 | 6.45E-01 | -1.07 | 8.58E-01 | -0.75 | 7.74E-01 |
| RAD17     | -0.37 | 6.45E-01 | -0.74 | 7.71E-01 | -0.83 | 7.96E-01 |
| TIMM10B   | -0.37 | 6.46E-01 | -1.14 | 8.72E-01 | -0.39 | 6.51E-01 |
| C9orf50   | -0.37 | 6.46E-01 | -1.30 | 9.03E-01 | 0.31  | 3.78E-01 |
| MRPS2     | -0.37 | 6.46E-01 | -0.50 | 6.92E-01 | 0.56  | 2.86E-01 |
| CD37      | -0.37 | 6.46E-01 | -1.49 | 9.32E-01 | 0.21  | 4.17E-01 |
| XYLB      | -0.37 | 6.46E-01 | -0.52 | 6.97E-01 | -0.47 | 6.81E-01 |
| DET1      | -0.37 | 6.46E-01 | -0.13 | 5.50E-01 | 0.90  | 1.84E-01 |
| PINX1     | -0.37 | 6.46E-01 | -0.03 | 5.11E-01 | 0.43  | 3.35E-01 |

|          |       |          |       |          |       |          |
|----------|-------|----------|-------|----------|-------|----------|
| UNC79    | -0.37 | 6.46E-01 | -0.54 | 7.05E-01 | -0.09 | 5.35E-01 |
| ANKRD54  | -0.37 | 6.46E-01 | -0.77 | 7.81E-01 | -0.45 | 6.73E-01 |
| ZNF70    | -0.37 | 6.46E-01 | -1.31 | 9.04E-01 | 1.22  | 1.12E-01 |
| EPC2     | -0.37 | 6.46E-01 | -0.58 | 7.19E-01 | -0.07 | 5.27E-01 |
| GMPR     | -0.37 | 6.46E-01 | -0.60 | 7.24E-01 | -0.19 | 5.75E-01 |
| TMEM86B  | -0.37 | 6.46E-01 | 1.45  | 7.31E-02 | 0.24  | 4.05E-01 |
| IDO2     | -0.37 | 6.46E-01 | -0.79 | 7.85E-01 | 0.00  | 4.99E-01 |
| ZNF582   | -0.37 | 6.46E-01 | -0.74 | 7.69E-01 | -0.53 | 7.01E-01 |
| SH3BGRL3 | -0.38 | 6.46E-01 | -0.66 | 7.44E-01 | -0.85 | 8.01E-01 |
| EGF      | -0.38 | 6.46E-01 | -0.51 | 6.96E-01 | -0.40 | 6.54E-01 |
| CLUAP1   | -0.38 | 6.46E-01 | -0.09 | 5.36E-01 | -0.32 | 6.24E-01 |
| ADH5     | -0.38 | 6.46E-01 | 0.28  | 3.89E-01 | -1.54 | 9.38E-01 |
| SEC24D   | -0.38 | 6.46E-01 | -0.55 | 7.10E-01 | -0.52 | 6.98E-01 |
| TM2D3    | -0.38 | 6.46E-01 | 0.20  | 4.22E-01 | -1.48 | 9.31E-01 |
| EDDM3A   | -0.38 | 6.47E-01 | -0.94 | 8.26E-01 | 0.43  | 3.32E-01 |
| AHI1     | -0.38 | 6.47E-01 | 0.57  | 2.85E-01 | -1.44 | 9.25E-01 |
| AVPI1    | -0.38 | 6.47E-01 | -0.48 | 6.83E-01 | 0.38  | 3.51E-01 |
| KIF5B    | -0.38 | 6.47E-01 | -0.37 | 6.44E-01 | -1.19 | 8.84E-01 |
| CHKB     | -0.38 | 6.47E-01 | -0.83 | 7.97E-01 | 1.54  | 6.21E-02 |
| SMARCC1  | -0.38 | 6.47E-01 | -0.10 | 5.40E-01 | 0.88  | 1.90E-01 |
| CREG1    | -0.38 | 6.47E-01 | -0.44 | 6.70E-01 | -0.15 | 5.58E-01 |
| DNAH3    | -0.38 | 6.47E-01 | -0.39 | 6.53E-01 | -0.37 | 6.43E-01 |
| DUOX2    | -0.38 | 6.47E-01 | 0.53  | 2.97E-01 | 0.46  | 3.22E-01 |
| TMEM235  | -0.38 | 6.47E-01 | 0.33  | 3.72E-01 | 0.88  | 1.88E-01 |
| HIGD2A   | -0.38 | 6.47E-01 | -0.39 | 6.52E-01 | -1.26 | 8.97E-01 |
| EIF4EBP3 | -0.38 | 6.47E-01 | 0.12  | 4.52E-01 | 0.21  | 4.15E-01 |
| KCNK16   | -0.38 | 6.47E-01 | 0.35  | 3.63E-01 | -1.34 | 9.09E-01 |
| DLGAP4   | -0.38 | 6.48E-01 | -1.46 | 9.28E-01 | 0.13  | 4.47E-01 |
| BIRC7    | -0.38 | 6.48E-01 | -0.94 | 8.26E-01 | 0.04  | 4.85E-01 |
| HDDC3    | -0.38 | 6.48E-01 | 0.61  | 2.69E-01 | 0.06  | 4.76E-01 |
| CLPB     | -0.38 | 6.48E-01 | 0.09  | 4.63E-01 | 1.05  | 1.46E-01 |

|          |       |          |       |          |       |          |
|----------|-------|----------|-------|----------|-------|----------|
| ACSL1    | -0.38 | 6.48E-01 | -0.57 | 7.14E-01 | -0.56 | 7.12E-01 |
| VPS51    | -0.38 | 6.48E-01 | 1.69  | 4.58E-02 | 1.06  | 1.45E-01 |
| IPCEF1   | -0.38 | 6.48E-01 | -0.41 | 6.58E-01 | 0.50  | 3.07E-01 |
| ZNF772   | -0.38 | 6.48E-01 | -0.81 | 7.90E-01 | -0.20 | 5.79E-01 |
| IQSEC1   | -0.38 | 6.48E-01 | 0.82  | 2.07E-01 | -1.10 | 8.65E-01 |
| SUV420H1 | -0.38 | 6.48E-01 | -0.19 | 5.76E-01 | -0.69 | 7.54E-01 |
| TRPM2    | -0.38 | 6.48E-01 | -0.39 | 6.53E-01 | -0.83 | 7.96E-01 |
| URB2     | -0.38 | 6.48E-01 | -0.18 | 5.70E-01 | -1.44 | 9.24E-01 |
| SYT12    | -0.38 | 6.48E-01 | -0.45 | 6.73E-01 | -0.61 | 7.29E-01 |
| CYCS     | -0.38 | 6.48E-01 | -1.45 | 9.26E-01 | 0.17  | 4.31E-01 |
| KIF2B    | -0.38 | 6.48E-01 | 0.14  | 4.45E-01 | 0.35  | 3.63E-01 |
| RDH14    | -0.38 | 6.48E-01 | -0.12 | 5.50E-01 | 0.27  | 3.92E-01 |
| SUPT16H  | -0.38 | 6.48E-01 | -0.47 | 6.80E-01 | 0.13  | 4.46E-01 |
| DHDDS    | -0.38 | 6.48E-01 | -0.19 | 5.77E-01 | -1.27 | 8.97E-01 |
| MBD5     | -0.38 | 6.48E-01 | 0.46  | 3.23E-01 | 1.23  | 1.10E-01 |
| IRF2BPL  | -0.38 | 6.48E-01 | -0.33 | 6.31E-01 | 1.34  | 9.02E-02 |
| MGC10955 | -0.38 | 6.48E-01 | -0.85 | 8.03E-01 | 0.68  | 2.47E-01 |
| WNK2     | -0.38 | 6.48E-01 | 0.10  | 4.60E-01 | -1.33 | 9.09E-01 |
| TRIM7    | -0.38 | 6.49E-01 | -0.42 | 6.62E-01 | 0.09  | 4.64E-01 |
| UPK3A    | -0.38 | 6.49E-01 | -0.30 | 6.19E-01 | -1.17 | 8.79E-01 |
| TNNI1    | -0.38 | 6.49E-01 | 1.03  | 1.51E-01 | -0.02 | 5.07E-01 |
| FOLR4    | -0.38 | 6.49E-01 | 0.75  | 2.27E-01 | 0.33  | 3.70E-01 |
| ELOVL5   | -0.38 | 6.49E-01 | -0.41 | 6.58E-01 | 0.40  | 3.46E-01 |
| HIRA     | -0.38 | 6.49E-01 | 0.66  | 2.54E-01 | -0.19 | 5.74E-01 |
| KBTBD12  | -0.38 | 6.49E-01 | -0.07 | 5.30E-01 | 0.81  | 2.10E-01 |
| MFAP5    | -0.38 | 6.49E-01 | -0.59 | 7.24E-01 | -0.15 | 5.59E-01 |
| POU2F1   | -0.38 | 6.49E-01 | 0.65  | 2.57E-01 | -0.22 | 5.88E-01 |
| SLC4A9   | -0.38 | 6.49E-01 | -0.57 | 7.16E-01 | 0.16  | 4.37E-01 |
| AANAT    | -0.38 | 6.49E-01 | -0.76 | 7.77E-01 | -0.55 | 7.10E-01 |
| TMEM88B  | -0.38 | 6.49E-01 | 0.45  | 3.27E-01 | -2.00 | 9.77E-01 |
| RCN3     | -0.38 | 6.49E-01 | 0.46  | 3.21E-01 | -0.51 | 6.96E-01 |

|               |       |          |       |          |       |          |
|---------------|-------|----------|-------|----------|-------|----------|
| CCDC73        | -0.38 | 6.49E-01 | 1.23  | 1.10E-01 | 1.67  | 4.77E-02 |
| DLL1          | -0.38 | 6.49E-01 | -0.19 | 5.76E-01 | -1.28 | 9.00E-01 |
| ZDHC22        | -0.38 | 6.49E-01 | 0.50  | 3.09E-01 | -0.01 | 5.03E-01 |
| ACO2          | -0.38 | 6.49E-01 | -0.43 | 6.67E-01 | -0.08 | 5.31E-01 |
| DAK           | -0.38 | 6.49E-01 | -0.70 | 7.57E-01 | -0.60 | 7.24E-01 |
| ATP12A        | -0.38 | 6.49E-01 | -0.59 | 7.23E-01 | 0.35  | 3.62E-01 |
| CTD-2368P22.1 | -0.38 | 6.50E-01 | 0.00  | 5.02E-01 | 0.95  | 1.72E-01 |
| GPR156        | -0.38 | 6.50E-01 | -0.18 | 5.72E-01 | 0.32  | 3.76E-01 |
| GRTP1         | -0.38 | 6.50E-01 | 0.80  | 2.13E-01 | 1.26  | 1.05E-01 |
| IER5          | -0.38 | 6.50E-01 | -0.60 | 7.24E-01 | 0.87  | 1.92E-01 |
| KCTD15        | -0.38 | 6.50E-01 | 0.26  | 3.98E-01 | 0.03  | 4.86E-01 |
| PLIN5         | -0.38 | 6.50E-01 | -0.16 | 5.65E-01 | -0.32 | 6.27E-01 |
| MT1X          | -0.38 | 6.50E-01 | -1.07 | 8.58E-01 | -0.73 | 7.67E-01 |
| ZNF221        | -0.38 | 6.50E-01 | -0.13 | 5.52E-01 | -0.61 | 7.30E-01 |
| PDE7B         | -0.38 | 6.50E-01 | 0.70  | 2.43E-01 | 1.12  | 1.31E-01 |
| MTMR12        | -0.39 | 6.50E-01 | 0.83  | 2.04E-01 | -0.27 | 6.05E-01 |
| IL32          | -0.39 | 6.50E-01 | 0.41  | 3.43E-01 | -1.53 | 9.37E-01 |
| CEP57L1       | -0.39 | 6.50E-01 | 0.59  | 2.76E-01 | -0.88 | 8.11E-01 |
| PDCD2L        | -0.39 | 6.50E-01 | 0.89  | 1.87E-01 | -0.61 | 7.29E-01 |
| NKX1-1        | -0.39 | 6.50E-01 | -0.02 | 5.10E-01 | 1.34  | 8.98E-02 |
| DNAJC25       | -0.39 | 6.50E-01 | 1.17  | 1.21E-01 | 0.79  | 2.14E-01 |
| DNAJC25-GNG10 | -0.39 | 6.50E-01 | 1.17  | 1.21E-01 | 0.79  | 2.14E-01 |
| SLC2A2        | -0.39 | 6.50E-01 | -0.74 | 7.70E-01 | -0.63 | 7.36E-01 |
| KCNV2         | -0.39 | 6.50E-01 | -1.36 | 9.13E-01 | 0.48  | 3.17E-01 |
| TMEM184C      | -0.39 | 6.50E-01 | -0.73 | 7.67E-01 | -0.50 | 6.90E-01 |
| TAS2R5        | -0.39 | 6.50E-01 | -0.20 | 5.78E-01 | -0.80 | 7.89E-01 |
| SAA2          | -0.39 | 6.50E-01 | 0.18  | 4.29E-01 | -1.34 | 9.11E-01 |
| RP11-15E18.4  | -0.39 | 6.50E-01 | -0.82 | 7.94E-01 | -0.40 | 6.54E-01 |
| RACGAP1       | -0.39 | 6.50E-01 | 0.29  | 3.86E-01 | 1.28  | 9.96E-02 |
| METTL18       | -0.39 | 6.50E-01 | 1.44  | 7.45E-02 | 1.58  | 5.75E-02 |
| WDR70         | -0.39 | 6.50E-01 | -0.26 | 6.03E-01 | -0.53 | 7.02E-01 |

|           |       |          |       |          |       |          |
|-----------|-------|----------|-------|----------|-------|----------|
| FBXW10    | -0.39 | 6.50E-01 | -0.62 | 7.31E-01 | -0.10 | 5.41E-01 |
| NIPSNAP1  | -0.39 | 6.51E-01 | -0.39 | 6.52E-01 | 1.29  | 9.87E-02 |
| BRI3      | -0.39 | 6.51E-01 | 0.37  | 3.54E-01 | 0.26  | 3.96E-01 |
| CHRNB1    | -0.39 | 6.51E-01 | -1.00 | 8.41E-01 | -0.73 | 7.68E-01 |
| TARS      | -0.39 | 6.51E-01 | 0.88  | 1.89E-01 | -0.70 | 7.57E-01 |
| FAM3D     | -0.39 | 6.51E-01 | -0.96 | 8.32E-01 | 0.56  | 2.88E-01 |
| GABARAPL2 | -0.39 | 6.51E-01 | -0.74 | 7.71E-01 | 0.38  | 3.53E-01 |
| WBP1      | -0.39 | 6.51E-01 | -2.01 | 9.78E-01 | 0.18  | 4.30E-01 |
| LLGL2     | -0.39 | 6.51E-01 | 0.41  | 3.41E-01 | -0.16 | 5.64E-01 |
| PDIA2     | -0.39 | 6.51E-01 | -0.50 | 6.91E-01 | 0.61  | 2.72E-01 |
| ROS1      | -0.39 | 6.51E-01 | -0.57 | 7.15E-01 | 0.30  | 3.80E-01 |
| REG3A     | -0.39 | 6.51E-01 | -1.13 | 8.70E-01 | 0.74  | 2.29E-01 |
| IFNA4     | -0.39 | 6.51E-01 | -0.39 | 6.53E-01 | -1.00 | 8.41E-01 |
| KCNE2     | -0.39 | 6.51E-01 | -0.44 | 6.70E-01 | -0.09 | 5.34E-01 |
| PLIN4     | -0.39 | 6.51E-01 | -1.12 | 8.68E-01 | 0.65  | 2.58E-01 |
| EID1      | -0.39 | 6.51E-01 | -0.89 | 8.13E-01 | -0.25 | 5.98E-01 |
| TMEM9     | -0.39 | 6.51E-01 | 0.33  | 3.69E-01 | -0.77 | 7.78E-01 |
| C16orf80  | -0.39 | 6.52E-01 | 1.49  | 6.81E-02 | 0.13  | 4.48E-01 |
| TNFRSF10B | -0.39 | 6.52E-01 | 0.19  | 4.24E-01 | -0.18 | 5.70E-01 |
| DEFB1     | -0.39 | 6.52E-01 | 0.42  | 3.39E-01 | -0.31 | 6.20E-01 |
| MSRB3     | -0.39 | 6.52E-01 | -0.02 | 5.09E-01 | -1.20 | 8.85E-01 |
| RBCK1     | -0.39 | 6.52E-01 | 0.51  | 3.06E-01 | -0.28 | 6.11E-01 |
| TCHH      | -0.39 | 6.52E-01 | 0.54  | 2.93E-01 | -2.79 | 9.97E-01 |
| USP50     | -0.39 | 6.52E-01 | -0.67 | 7.48E-01 | -1.36 | 9.13E-01 |
| TVP23A    | -0.39 | 6.52E-01 | 0.11  | 4.58E-01 | -1.00 | 8.41E-01 |
| ABLIM3    | -0.39 | 6.52E-01 | 0.53  | 2.99E-01 | -1.50 | 9.33E-01 |
| PACRGL    | -0.39 | 6.52E-01 | -0.38 | 6.47E-01 | 0.54  | 2.94E-01 |
| ALDH1A1   | -0.39 | 6.52E-01 | -0.43 | 6.66E-01 | -0.48 | 6.85E-01 |
| NROB2     | -0.39 | 6.52E-01 | -0.31 | 6.20E-01 | 1.81  | 3.49E-02 |
| MYH6      | -0.39 | 6.52E-01 | -0.63 | 7.37E-01 | 0.66  | 2.53E-01 |
| KCNH5     | -0.39 | 6.52E-01 | -0.94 | 8.25E-01 | 0.67  | 2.53E-01 |

|           |       |          |       |          |       |          |
|-----------|-------|----------|-------|----------|-------|----------|
| SPINT2    | -0.39 | 6.52E-01 | 0.42  | 3.37E-01 | -2.23 | 9.87E-01 |
| ADRA1A    | -0.39 | 6.52E-01 | 0.26  | 3.96E-01 | -1.07 | 8.57E-01 |
| TWF2      | -0.39 | 6.53E-01 | -0.29 | 6.13E-01 | -0.18 | 5.71E-01 |
| OR4K14    | -0.39 | 6.53E-01 | -1.40 | 9.19E-01 | -0.34 | 6.33E-01 |
| ORM1      | -0.39 | 6.53E-01 | -0.17 | 5.69E-01 | 0.10  | 4.59E-01 |
| GRIK1-AS2 | -0.39 | 6.53E-01 | 0.62  | 2.69E-01 | -2.62 | 9.96E-01 |
| NRXN3     | -0.39 | 6.53E-01 | 0.69  | 2.45E-01 | -0.34 | 6.31E-01 |
| GPR108    | -0.39 | 6.53E-01 | 1.09  | 1.37E-01 | 1.94  | 2.59E-02 |
| ZNF341    | -0.39 | 6.53E-01 | -0.19 | 5.75E-01 | -1.60 | 9.45E-01 |
| MFAP2     | -0.39 | 6.53E-01 | 0.64  | 2.62E-01 | 0.76  | 2.24E-01 |
| PARP11    | -0.39 | 6.53E-01 | -0.23 | 5.92E-01 | -0.11 | 5.43E-01 |
| SEC14L5   | -0.39 | 6.53E-01 | 0.68  | 2.49E-01 | 0.81  | 2.09E-01 |
| FAM129C   | -0.39 | 6.53E-01 | -1.66 | 9.52E-01 | -0.16 | 5.62E-01 |
| CETN3     | -0.39 | 6.53E-01 | -0.26 | 6.01E-01 | -2.23 | 9.87E-01 |
| PHLPP1    | -0.39 | 6.53E-01 | -0.46 | 6.79E-01 | -0.29 | 6.13E-01 |
| CPZ       | -0.39 | 6.53E-01 | -1.21 | 8.87E-01 | 0.23  | 4.07E-01 |
| PROX1     | -0.39 | 6.53E-01 | -0.95 | 8.28E-01 | 0.40  | 3.45E-01 |
| TDRD15    | -0.39 | 6.53E-01 | 0.26  | 3.98E-01 | -1.04 | 8.51E-01 |
| C19orf80  | -0.39 | 6.53E-01 | 0.16  | 4.38E-01 | -0.75 | 7.73E-01 |
| SLFN14    | -0.39 | 6.53E-01 | -1.62 | 9.47E-01 | 0.28  | 3.90E-01 |
| SYCE1L    | -0.39 | 6.53E-01 | -1.58 | 9.43E-01 | 0.19  | 4.23E-01 |
| PNPT1     | -0.39 | 6.54E-01 | 1.16  | 1.23E-01 | -1.60 | 9.45E-01 |
| C12orf50  | -0.40 | 6.54E-01 | -0.84 | 8.01E-01 | -0.41 | 6.57E-01 |
| P4HA2     | -0.40 | 6.54E-01 | 0.46  | 3.21E-01 | 0.29  | 3.86E-01 |
| CNN3      | -0.40 | 6.54E-01 | -0.34 | 6.33E-01 | 0.69  | 2.44E-01 |
| WARS2     | -0.40 | 6.54E-01 | -1.13 | 8.71E-01 | 1.00  | 1.59E-01 |
| CSE1L     | -0.40 | 6.54E-01 | -0.16 | 5.64E-01 | -0.79 | 7.85E-01 |
| PRSS37    | -0.40 | 6.54E-01 | -0.10 | 5.38E-01 | 1.04  | 1.48E-01 |
| USP1      | -0.40 | 6.54E-01 | 0.81  | 2.09E-01 | -0.17 | 5.69E-01 |
| NME7      | -0.40 | 6.54E-01 | 0.89  | 1.88E-01 | 0.25  | 4.03E-01 |
| IKZF2     | -0.40 | 6.54E-01 | 0.43  | 3.33E-01 | 0.68  | 2.49E-01 |



|              |       |          |       |          |       |          |
|--------------|-------|----------|-------|----------|-------|----------|
| MMP20        | -0.40 | 6.54E-01 | -0.65 | 7.43E-01 | 0.46  | 3.22E-01 |
| PCDHB12      | -0.40 | 6.54E-01 | -0.52 | 6.97E-01 | -1.22 | 8.88E-01 |
| QSER1        | -0.40 | 6.55E-01 | -0.23 | 5.91E-01 | 1.16  | 1.24E-01 |
| MPG          | -0.40 | 6.55E-01 | -0.31 | 6.22E-01 | -0.24 | 5.96E-01 |
| CA8          | -0.40 | 6.55E-01 | -1.38 | 9.17E-01 | -0.24 | 5.94E-01 |
| SMARCD1      | -0.40 | 6.55E-01 | -0.67 | 7.50E-01 | 0.48  | 3.17E-01 |
| SDC2         | -0.40 | 6.55E-01 | -1.70 | 9.56E-01 | 1.39  | 8.17E-02 |
| C6orf132     | -0.40 | 6.55E-01 | 0.10  | 4.62E-01 | -0.03 | 5.13E-01 |
| IQCB1        | -0.40 | 6.55E-01 | -0.02 | 5.06E-01 | -1.01 | 8.44E-01 |
| VPS37D       | -0.40 | 6.55E-01 | 0.17  | 4.33E-01 | -2.02 | 9.79E-01 |
| RP11-438J1.1 | -0.40 | 6.55E-01 | -0.37 | 6.44E-01 | -0.86 | 8.05E-01 |
| GIP          | -0.40 | 6.55E-01 | -0.73 | 7.69E-01 | -1.15 | 8.75E-01 |
| SUPT6H       | -0.40 | 6.55E-01 | -0.86 | 8.06E-01 | -0.26 | 6.01E-01 |
| LAIR1        | -0.40 | 6.55E-01 | -1.31 | 9.04E-01 | -0.24 | 5.94E-01 |
| MCCC2        | -0.40 | 6.55E-01 | 0.49  | 3.13E-01 | -0.50 | 6.90E-01 |
| NUDT4        | -0.40 | 6.55E-01 | 0.20  | 4.19E-01 | -1.17 | 8.80E-01 |
| IGSF9B       | -0.40 | 6.55E-01 | -1.38 | 9.16E-01 | -0.17 | 5.66E-01 |
| ZIC4         | -0.40 | 6.55E-01 | -1.42 | 9.23E-01 | -0.12 | 5.48E-01 |
| NXPH1        | -0.40 | 6.55E-01 | -1.18 | 8.82E-01 | 1.83  | 3.36E-02 |
| EARS2        | -0.40 | 6.55E-01 | -0.01 | 5.04E-01 | 0.21  | 4.18E-01 |
| PODNL1       | -0.40 | 6.56E-01 | -0.50 | 6.92E-01 | 0.61  | 2.70E-01 |
| KRTAP13-2    | -0.40 | 6.56E-01 | -0.38 | 6.50E-01 | -0.61 | 7.28E-01 |
| TRUB1        | -0.40 | 6.56E-01 | 0.48  | 3.14E-01 | -0.71 | 7.61E-01 |
| CLDN3        | -0.40 | 6.56E-01 | 0.21  | 4.17E-01 | -1.52 | 9.36E-01 |
| LRRC70       | -0.40 | 6.56E-01 | -1.45 | 9.27E-01 | -0.79 | 7.86E-01 |
| C22orf39     | -0.40 | 6.56E-01 | 0.68  | 2.48E-01 | -0.20 | 5.78E-01 |
| TTC18        | -0.40 | 6.56E-01 | -1.28 | 8.99E-01 | -0.19 | 5.74E-01 |
| KRTAP1-1     | -0.40 | 6.56E-01 | -1.11 | 8.67E-01 | -0.22 | 5.89E-01 |
| TMEM214      | -0.40 | 6.56E-01 | 1.01  | 1.57E-01 | 0.47  | 3.20E-01 |
| DEPDC4       | -0.40 | 6.56E-01 | -0.69 | 7.56E-01 | 0.35  | 3.63E-01 |
| C10orf99     | -0.40 | 6.56E-01 | -1.13 | 8.71E-01 | 1.02  | 1.55E-01 |

|               |       |          |       |          |       |          |
|---------------|-------|----------|-------|----------|-------|----------|
| MIF4GD        | -0.40 | 6.56E-01 | 0.97  | 1.65E-01 | -0.22 | 5.86E-01 |
| LAMC1         | -0.40 | 6.56E-01 | -0.40 | 6.56E-01 | -0.55 | 7.07E-01 |
| DPH3          | -0.40 | 6.56E-01 | 0.35  | 3.65E-01 | 0.35  | 3.65E-01 |
| KY            | -0.40 | 6.56E-01 | -0.68 | 7.53E-01 | -0.54 | 7.06E-01 |
| ZYX           | -0.40 | 6.56E-01 | -0.55 | 7.08E-01 | 0.09  | 4.63E-01 |
| MEF2B         | -0.40 | 6.56E-01 | -0.29 | 6.13E-01 | -0.26 | 6.02E-01 |
| PHF7          | -0.40 | 6.56E-01 | -0.22 | 5.88E-01 | 1.06  | 1.43E-01 |
| ORC5          | -0.40 | 6.56E-01 | -1.05 | 8.54E-01 | 0.11  | 4.56E-01 |
| RAB34         | -0.40 | 6.56E-01 | -0.03 | 5.10E-01 | -2.81 | 9.98E-01 |
| MCTP1         | -0.40 | 6.56E-01 | -0.81 | 7.91E-01 | 0.44  | 3.29E-01 |
| CCDC144NL     | -0.40 | 6.57E-01 | -0.11 | 5.45E-01 | 0.53  | 2.99E-01 |
| WSB1          | -0.40 | 6.57E-01 | 1.36  | 8.71E-02 | 0.31  | 3.78E-01 |
| TEPP          | -0.40 | 6.57E-01 | 0.14  | 4.43E-01 | -0.49 | 6.89E-01 |
| ZNF746        | -0.40 | 6.57E-01 | -0.52 | 6.99E-01 | 0.07  | 4.71E-01 |
| SPIRE1        | -0.40 | 6.57E-01 | -0.83 | 7.96E-01 | -0.18 | 5.71E-01 |
| MEF2BNB-MEF2B | -0.40 | 6.57E-01 | -0.27 | 6.08E-01 | -0.30 | 6.17E-01 |
| SSX2IP        | -0.40 | 6.57E-01 | 0.04  | 4.86E-01 | -0.33 | 6.30E-01 |
| GPR179        | -0.40 | 6.57E-01 | -0.75 | 7.73E-01 | -0.27 | 6.07E-01 |
| ANKRD2        | -0.40 | 6.57E-01 | -0.38 | 6.46E-01 | -1.30 | 9.03E-01 |
| ANPEP         | -0.40 | 6.57E-01 | -0.55 | 7.08E-01 | -0.41 | 6.59E-01 |
| ZNF250        | -0.40 | 6.57E-01 | -0.47 | 6.79E-01 | -1.49 | 9.32E-01 |
| STPG1         | -0.41 | 6.57E-01 | -1.18 | 8.82E-01 | 0.55  | 2.90E-01 |
| OVOL3         | -0.41 | 6.57E-01 | -0.20 | 5.79E-01 | -1.75 | 9.60E-01 |
| IGF2R         | -0.41 | 6.58E-01 | 1.39  | 8.20E-02 | -1.42 | 9.22E-01 |
| FOXE1         | -0.41 | 6.58E-01 | -0.01 | 5.05E-01 | 1.16  | 1.22E-01 |
| KNSTRN        | -0.41 | 6.58E-01 | 0.70  | 2.43E-01 | 1.36  | 8.76E-02 |
| ANKRD29       | -0.41 | 6.58E-01 | -1.53 | 9.37E-01 | 0.48  | 3.15E-01 |
| ASXL2         | -0.41 | 6.58E-01 | -0.70 | 7.59E-01 | 0.21  | 4.17E-01 |
| DLX5          | -0.41 | 6.58E-01 | 0.25  | 4.03E-01 | -0.80 | 7.89E-01 |
| DDHD1         | -0.41 | 6.58E-01 | 0.03  | 4.88E-01 | -1.37 | 9.14E-01 |
| CD63          | -0.41 | 6.58E-01 | 0.24  | 4.07E-01 | -1.21 | 8.87E-01 |

|            |       |          |       |          |       |          |
|------------|-------|----------|-------|----------|-------|----------|
| C1orf173   | -0.41 | 6.58E-01 | 0.29  | 3.85E-01 | -1.03 | 8.48E-01 |
| KLRD1      | -0.41 | 6.58E-01 | 0.57  | 2.84E-01 | -1.09 | 8.61E-01 |
| TRIM60     | -0.41 | 6.58E-01 | 0.33  | 3.70E-01 | -0.37 | 6.45E-01 |
| TTC33      | -0.41 | 6.58E-01 | -0.67 | 7.47E-01 | -0.23 | 5.91E-01 |
| LAMA3      | -0.41 | 6.58E-01 | -0.31 | 6.22E-01 | 1.82  | 3.43E-02 |
| MC1R       | -0.41 | 6.58E-01 | -0.95 | 8.29E-01 | 0.71  | 2.38E-01 |
| C12orf71   | -0.41 | 6.58E-01 | -1.38 | 9.16E-01 | 0.06  | 4.78E-01 |
| CYP4V2     | -0.41 | 6.58E-01 | -0.83 | 7.96E-01 | -0.16 | 5.64E-01 |
| COMMD2     | -0.41 | 6.59E-01 | 1.91  | 2.84E-02 | 1.21  | 1.13E-01 |
| IFNA1      | -0.41 | 6.59E-01 | -0.68 | 7.53E-01 | 0.89  | 1.87E-01 |
| RPL11      | -0.41 | 6.59E-01 | 0.21  | 4.18E-01 | 1.28  | 1.01E-01 |
| VPS33A     | -0.41 | 6.59E-01 | -0.29 | 6.15E-01 | -0.32 | 6.26E-01 |
| VHLL       | -0.41 | 6.59E-01 | 0.30  | 3.84E-01 | -0.61 | 7.29E-01 |
| CRELD1     | -0.41 | 6.59E-01 | -0.34 | 6.35E-01 | 0.35  | 3.64E-01 |
| FZD6       | -0.41 | 6.59E-01 | 0.92  | 1.78E-01 | -0.89 | 8.13E-01 |
| SRRM3      | -0.41 | 6.59E-01 | -1.18 | 8.80E-01 | 0.36  | 3.59E-01 |
| NEDD8-MDP1 | -0.41 | 6.59E-01 | 0.09  | 4.64E-01 | 0.62  | 2.69E-01 |
| OR5H14     | -0.41 | 6.59E-01 | -1.53 | 9.37E-01 | -0.17 | 5.67E-01 |
| SFR1       | -0.41 | 6.59E-01 | 0.69  | 2.45E-01 | -0.48 | 6.85E-01 |
| PRRC2B     | -0.41 | 6.59E-01 | 0.24  | 4.06E-01 | 1.89  | 2.94E-02 |
| ABCC4      | -0.41 | 6.59E-01 | -1.20 | 8.84E-01 | -1.01 | 8.45E-01 |
| PHOX2B     | -0.41 | 6.59E-01 | -0.32 | 6.25E-01 | 0.09  | 4.65E-01 |
| TSKU       | -0.41 | 6.60E-01 | -1.04 | 8.52E-01 | -0.61 | 7.28E-01 |
| F2RL3      | -0.41 | 6.60E-01 | -0.85 | 8.03E-01 | 0.83  | 2.04E-01 |
| NVL        | -0.41 | 6.60E-01 | -0.24 | 5.96E-01 | -0.83 | 7.98E-01 |
| GALC       | -0.41 | 6.60E-01 | -0.52 | 6.98E-01 | 1.15  | 1.26E-01 |
| C20orf112  | -0.41 | 6.60E-01 | 0.31  | 3.77E-01 | 3.19  | 7.04E-04 |
| TMEM219    | -0.41 | 6.60E-01 | -0.72 | 7.65E-01 | -0.81 | 7.91E-01 |
| TRIM5      | -0.41 | 6.60E-01 | 0.41  | 3.41E-01 | 0.11  | 4.56E-01 |
| KCNH1      | -0.41 | 6.60E-01 | -0.29 | 6.13E-01 | 0.02  | 4.91E-01 |
| ZMYM2      | -0.41 | 6.60E-01 | 0.65  | 2.56E-01 | 0.75  | 2.26E-01 |

|              |       |          |       |          |       |          |
|--------------|-------|----------|-------|----------|-------|----------|
| SOX18        | -0.41 | 6.60E-01 | -0.12 | 5.49E-01 | -1.13 | 8.70E-01 |
| FAM47E-STBD1 | -0.41 | 6.60E-01 | 0.43  | 3.32E-01 | -1.01 | 8.43E-01 |
| SARNP        | -0.41 | 6.60E-01 | -0.18 | 5.71E-01 | -1.23 | 8.91E-01 |
| C1orf233     | -0.41 | 6.60E-01 | 0.77  | 2.21E-01 | -0.07 | 5.26E-01 |
| SLC3A2       | -0.41 | 6.60E-01 | -0.25 | 5.97E-01 | 0.00  | 4.98E-01 |
| MOB3A        | -0.41 | 6.60E-01 | 0.42  | 3.38E-01 | -1.71 | 9.57E-01 |
| TSPAN18      | -0.41 | 6.60E-01 | -1.90 | 9.72E-01 | 0.89  | 1.86E-01 |
| EPYC         | -0.41 | 6.60E-01 | -0.21 | 5.82E-01 | -1.52 | 9.36E-01 |
| FAM211B      | -0.41 | 6.60E-01 | -0.19 | 5.76E-01 | -1.14 | 8.74E-01 |
| CTRC         | -0.41 | 6.60E-01 | -1.92 | 9.73E-01 | -0.27 | 6.06E-01 |
| COA6         | -0.41 | 6.60E-01 | -0.82 | 7.93E-01 | -0.11 | 5.44E-01 |
| TMEM234      | -0.41 | 6.60E-01 | -0.91 | 8.20E-01 | -0.65 | 7.41E-01 |
| SCARA3       | -0.41 | 6.60E-01 | -0.75 | 7.74E-01 | -0.27 | 6.08E-01 |
| FAM171B      | -0.41 | 6.60E-01 | 0.13  | 4.50E-01 | 0.61  | 2.72E-01 |
| OSCP1        | -0.41 | 6.60E-01 | -0.11 | 5.44E-01 | -0.40 | 6.57E-01 |
| KANK1        | -0.41 | 6.60E-01 | -0.66 | 7.46E-01 | 0.58  | 2.79E-01 |
| ZNF853       | -0.41 | 6.61E-01 | -1.06 | 8.55E-01 | -0.05 | 5.22E-01 |
| RHNO1        | -0.42 | 6.61E-01 | -0.63 | 7.35E-01 | -0.44 | 6.72E-01 |
| ATG7         | -0.42 | 6.61E-01 | -0.89 | 8.13E-01 | 0.58  | 2.80E-01 |
| FAM47E-STBD1 | -0.42 | 6.61E-01 | 0.42  | 3.37E-01 | -0.99 | 8.39E-01 |
| OCLM         | -0.42 | 6.61E-01 | 1.05  | 1.46E-01 | 0.55  | 2.90E-01 |
| SLC7A8       | -0.42 | 6.61E-01 | -1.27 | 8.98E-01 | 0.49  | 3.12E-01 |
| SLC6A20      | -0.42 | 6.61E-01 | -0.71 | 7.61E-01 | 1.10  | 1.36E-01 |
| GALNT4       | -0.42 | 6.61E-01 | -0.32 | 6.27E-01 | -0.02 | 5.06E-01 |
| POC1B-GALNT4 | -0.42 | 6.61E-01 | -0.32 | 6.27E-01 | -0.02 | 5.06E-01 |
| KLRF1        | -0.42 | 6.62E-01 | -0.44 | 6.72E-01 | -1.15 | 8.74E-01 |
| TAS2R41      | -0.42 | 6.62E-01 | 0.49  | 3.11E-01 | 1.26  | 1.04E-01 |
| OR1E2        | -0.42 | 6.62E-01 | 0.02  | 4.91E-01 | -2.19 | 9.86E-01 |
| ART5         | -0.42 | 6.62E-01 | -1.49 | 9.32E-01 | -0.25 | 6.00E-01 |
| HNRNPA1L2    | -0.42 | 6.62E-01 | -0.33 | 6.30E-01 | -0.12 | 5.48E-01 |
| ITFG1        | -0.42 | 6.62E-01 | -0.24 | 5.95E-01 | -0.28 | 6.09E-01 |

|         |       |          |       |          |       |          |
|---------|-------|----------|-------|----------|-------|----------|
| CBX8    | -0.42 | 6.62E-01 | -0.31 | 6.20E-01 | 0.83  | 2.03E-01 |
| PCDH10  | -0.42 | 6.62E-01 | 2.03  | 2.12E-02 | -0.04 | 5.15E-01 |
| DEFA5   | -0.42 | 6.62E-01 | -0.19 | 5.75E-01 | -1.26 | 8.96E-01 |
| HRH4    | -0.42 | 6.62E-01 | -1.14 | 8.72E-01 | -0.57 | 7.14E-01 |
| PURB    | -0.42 | 6.62E-01 | -0.37 | 6.45E-01 | -0.17 | 5.66E-01 |
| WDR19   | -0.42 | 6.62E-01 | -1.26 | 8.95E-01 | 0.18  | 4.29E-01 |
| NKX6-1  | -0.42 | 6.62E-01 | -0.93 | 8.23E-01 | 0.55  | 2.90E-01 |
| CCDC63  | -0.42 | 6.62E-01 | -0.48 | 6.86E-01 | -0.66 | 7.44E-01 |
| ORC4    | -0.42 | 6.62E-01 | 0.69  | 2.44E-01 | 2.32  | 1.02E-02 |
| ZNF417  | -0.42 | 6.62E-01 | 0.84  | 2.02E-01 | -0.49 | 6.87E-01 |
| CNOT4   | -0.42 | 6.62E-01 | -0.56 | 7.11E-01 | -0.94 | 8.26E-01 |
| SIRT2   | -0.42 | 6.62E-01 | -0.11 | 5.44E-01 | -1.28 | 9.01E-01 |
| ATG4C   | -0.42 | 6.62E-01 | -0.68 | 7.52E-01 | -0.15 | 5.58E-01 |
| LRR34   | -0.42 | 6.63E-01 | -0.84 | 7.99E-01 | 0.70  | 2.41E-01 |
| GPR35   | -0.42 | 6.63E-01 | 0.85  | 1.98E-01 | -0.63 | 7.35E-01 |
| CDK4    | -0.42 | 6.63E-01 | -0.16 | 5.65E-01 | -0.55 | 7.10E-01 |
| UBLCP1  | -0.42 | 6.63E-01 | -0.16 | 5.64E-01 | -1.21 | 8.87E-01 |
| GBP6    | -0.42 | 6.63E-01 | -0.70 | 7.58E-01 | 0.45  | 3.27E-01 |
| ZNF564  | -0.42 | 6.63E-01 | -1.06 | 8.56E-01 | -0.13 | 5.51E-01 |
| GM2A    | -0.42 | 6.63E-01 | -1.69 | 9.55E-01 | 0.16  | 4.38E-01 |
| KLHDC7B | -0.42 | 6.63E-01 | -0.93 | 8.23E-01 | -0.68 | 7.53E-01 |
| CYP4F2  | -0.42 | 6.63E-01 | -0.84 | 7.99E-01 | -0.48 | 6.85E-01 |
| FOX3    | -0.42 | 6.63E-01 | 0.41  | 3.41E-01 | 1.44  | 7.51E-02 |
| FSHB    | -0.42 | 6.63E-01 | -0.27 | 6.05E-01 | -0.84 | 7.99E-01 |
| CLDN12  | -0.42 | 6.63E-01 | 0.59  | 2.79E-01 | 0.38  | 3.50E-01 |
| CCL19   | -0.42 | 6.63E-01 | -1.14 | 8.73E-01 | 1.00  | 1.60E-01 |
| OR2AG1  | -0.42 | 6.63E-01 | -0.15 | 5.59E-01 | -0.85 | 8.01E-01 |
| HEATR3  | -0.42 | 6.63E-01 | 0.25  | 4.01E-01 | -0.58 | 7.17E-01 |
| GJD3    | -0.42 | 6.63E-01 | -1.49 | 9.32E-01 | -0.71 | 7.60E-01 |
| KCNE4   | -0.42 | 6.63E-01 | -1.11 | 8.67E-01 | -0.19 | 5.77E-01 |
| DCUN1D3 | -0.42 | 6.64E-01 | 0.34  | 3.66E-01 | -0.11 | 5.46E-01 |

|          |       |          |       |          |       |          |
|----------|-------|----------|-------|----------|-------|----------|
| NHLRC3   | -0.42 | 6.64E-01 | -0.80 | 7.88E-01 | -0.14 | 5.56E-01 |
| TMEM25   | -0.42 | 6.64E-01 | -0.79 | 7.86E-01 | -0.21 | 5.82E-01 |
| ITGA4    | -0.42 | 6.64E-01 | -0.19 | 5.75E-01 | 0.04  | 4.85E-01 |
| SHISA8   | -0.42 | 6.64E-01 | 0.52  | 3.03E-01 | 0.69  | 2.46E-01 |
| DCT      | -0.42 | 6.64E-01 | 0.99  | 1.60E-01 | -1.14 | 8.74E-01 |
| PPFIBP1  | -0.42 | 6.64E-01 | 0.44  | 3.29E-01 | -0.75 | 7.74E-01 |
| SIK3     | -0.42 | 6.64E-01 | -1.83 | 9.66E-01 | 0.01  | 4.98E-01 |
| TMIGD1   | -0.42 | 6.64E-01 | -0.15 | 5.61E-01 | -0.40 | 6.57E-01 |
| ERVV-1   | -0.42 | 6.64E-01 | 0.70  | 2.43E-01 | -0.10 | 5.40E-01 |
| C9orf72  | -0.42 | 6.64E-01 | -0.63 | 7.35E-01 | 0.02  | 4.91E-01 |
| CCDC177  | -0.42 | 6.64E-01 | -0.09 | 5.37E-01 | -0.30 | 6.20E-01 |
| PVRL2    | -0.42 | 6.64E-01 | -0.13 | 5.51E-01 | 0.32  | 3.74E-01 |
| VSTM1    | -0.42 | 6.64E-01 | -0.12 | 5.46E-01 | 0.35  | 3.65E-01 |
| NEUROG2  | -0.42 | 6.64E-01 | -2.36 | 9.91E-01 | 0.31  | 3.80E-01 |
| C4orf45  | -0.42 | 6.64E-01 | -1.59 | 9.44E-01 | -0.15 | 5.61E-01 |
| C7orf31  | -0.42 | 6.65E-01 | -0.91 | 8.20E-01 | -0.01 | 5.04E-01 |
| LCE2B    | -0.43 | 6.65E-01 | -0.75 | 7.73E-01 | 0.10  | 4.62E-01 |
| KIAA1199 | -0.43 | 6.65E-01 | -0.56 | 7.14E-01 | -0.22 | 5.88E-01 |
| NR1H4    | -0.43 | 6.65E-01 | -0.65 | 7.43E-01 | 0.55  | 2.91E-01 |
| EBAG9    | -0.43 | 6.65E-01 | -1.00 | 8.42E-01 | -0.63 | 7.35E-01 |
| UBA52    | -0.43 | 6.65E-01 | 0.85  | 1.97E-01 | -1.00 | 8.40E-01 |
| TRIM61   | -0.43 | 6.65E-01 | 0.09  | 4.65E-01 | 0.06  | 4.77E-01 |
| FAM174A  | -0.43 | 6.65E-01 | 0.11  | 4.57E-01 | -1.18 | 8.81E-01 |
| OR13J1   | -0.43 | 6.65E-01 | -0.31 | 6.23E-01 | -0.99 | 8.38E-01 |
| RILP     | -0.43 | 6.65E-01 | -0.69 | 7.54E-01 | -0.59 | 7.21E-01 |
| RASA2    | -0.43 | 6.65E-01 | -1.23 | 8.90E-01 | 1.21  | 1.13E-01 |
| DAD1     | -0.43 | 6.65E-01 | -0.08 | 5.32E-01 | -1.42 | 9.23E-01 |
| B4GALNT3 | -0.43 | 6.65E-01 | -0.34 | 6.33E-01 | -0.31 | 6.21E-01 |
| LPIN3    | -0.43 | 6.65E-01 | -0.17 | 5.68E-01 | -0.13 | 5.52E-01 |
| MLF2     | -0.43 | 6.65E-01 | -0.47 | 6.81E-01 | 0.64  | 2.62E-01 |
| HSPA9    | -0.43 | 6.65E-01 | -0.38 | 6.46E-01 | -0.26 | 6.02E-01 |

|           |       |          |       |          |       |          |
|-----------|-------|----------|-------|----------|-------|----------|
| PKD2L2    | -0.43 | 6.65E-01 | -0.65 | 7.42E-01 | 0.03  | 4.86E-01 |
| SSH1      | -0.43 | 6.65E-01 | -0.82 | 7.93E-01 | -0.53 | 7.01E-01 |
| PFDN5     | -0.43 | 6.66E-01 | -0.20 | 5.78E-01 | -1.52 | 9.35E-01 |
| ANKRD13D  | -0.43 | 6.66E-01 | 1.39  | 8.21E-02 | 1.35  | 8.80E-02 |
| CXCL12    | -0.43 | 6.66E-01 | -0.68 | 7.51E-01 | -0.15 | 5.59E-01 |
| GCM1      | -0.43 | 6.66E-01 | 0.89  | 1.87E-01 | -1.90 | 9.71E-01 |
| TRIP13    | -0.43 | 6.66E-01 | -0.38 | 6.47E-01 | -0.91 | 8.19E-01 |
| TBCB      | -0.43 | 6.66E-01 | -0.07 | 5.28E-01 | -1.02 | 8.47E-01 |
| C1orf158  | -0.43 | 6.66E-01 | -0.90 | 8.15E-01 | -0.07 | 5.27E-01 |
| IDI2      | -0.43 | 6.66E-01 | -1.62 | 9.47E-01 | 0.71  | 2.40E-01 |
| DTD2      | -0.43 | 6.66E-01 | 0.10  | 4.62E-01 | 1.06  | 1.45E-01 |
| COL7A1    | -0.43 | 6.66E-01 | 0.09  | 4.63E-01 | 0.93  | 1.75E-01 |
| CPLX2     | -0.43 | 6.66E-01 | -0.29 | 6.16E-01 | -0.35 | 6.37E-01 |
| CMTM5     | -0.43 | 6.66E-01 | -1.15 | 8.75E-01 | 0.41  | 3.43E-01 |
| KRTAP25-1 | -0.43 | 6.66E-01 | 1.56  | 5.99E-02 | 0.84  | 2.00E-01 |
| FAM76A    | -0.43 | 6.66E-01 | -0.81 | 7.90E-01 | 0.36  | 3.60E-01 |
| ID4       | -0.43 | 6.67E-01 | -0.07 | 5.27E-01 | -0.97 | 8.34E-01 |
| SAA1      | -0.43 | 6.67E-01 | -0.62 | 7.33E-01 | 0.51  | 3.06E-01 |
| RBBP4     | -0.43 | 6.67E-01 | -0.43 | 6.68E-01 | -0.47 | 6.81E-01 |
| OTOR      | -0.43 | 6.67E-01 | -0.83 | 7.97E-01 | -0.25 | 5.98E-01 |
| DHX35     | -0.43 | 6.67E-01 | 0.68  | 2.49E-01 | 2.49  | 6.33E-03 |
| TMEM95    | -0.43 | 6.67E-01 | -0.41 | 6.58E-01 | -1.27 | 8.97E-01 |
| HILPDA    | -0.43 | 6.67E-01 | -0.65 | 7.42E-01 | -0.07 | 5.28E-01 |
| HAUS8     | -0.43 | 6.67E-01 | 0.28  | 3.91E-01 | -1.55 | 9.39E-01 |
| ADAMTSL4  | -0.43 | 6.67E-01 | -1.24 | 8.92E-01 | 0.40  | 3.45E-01 |
| C10orf126 | -0.43 | 6.67E-01 | 2.05  | 2.02E-02 | 0.45  | 3.26E-01 |
| ARHGEF15  | -0.43 | 6.67E-01 | -1.00 | 8.40E-01 | 0.67  | 2.51E-01 |
| TBC1D1    | -0.43 | 6.67E-01 | 0.68  | 2.47E-01 | -0.94 | 8.26E-01 |
| HNRNPH1   | -0.43 | 6.67E-01 | 1.34  | 9.06E-02 | -0.22 | 5.86E-01 |
| LYPLAL1   | -0.43 | 6.67E-01 | 0.31  | 3.77E-01 | 0.48  | 3.15E-01 |
| SPATA32   | -0.43 | 6.67E-01 | -0.24 | 5.94E-01 | 0.08  | 4.69E-01 |

|              |       |          |       |          |       |          |
|--------------|-------|----------|-------|----------|-------|----------|
| RP11-181C3.1 | -0.43 | 6.67E-01 | -0.21 | 5.85E-01 | 0.44  | 3.30E-01 |
| ADI1         | -0.43 | 6.67E-01 | 0.38  | 3.51E-01 | 0.19  | 4.25E-01 |
| PBX4         | -0.43 | 6.67E-01 | -0.78 | 7.81E-01 | -1.12 | 8.68E-01 |
| MYH8         | -0.43 | 6.67E-01 | -0.06 | 5.23E-01 | -1.68 | 9.53E-01 |
| ZNF467       | -0.43 | 6.67E-01 | -1.07 | 8.57E-01 | 0.62  | 2.68E-01 |
| PNKP         | -0.43 | 6.67E-01 | 0.93  | 1.76E-01 | -0.24 | 5.94E-01 |
| VTI1B        | -0.43 | 6.67E-01 | 0.17  | 4.31E-01 | -1.90 | 9.71E-01 |
| NFKBIA       | -0.43 | 6.68E-01 | -0.71 | 7.61E-01 | 1.18  | 1.18E-01 |
| CELSR2       | -0.43 | 6.68E-01 | -0.80 | 7.87E-01 | -0.45 | 6.73E-01 |
| GRIN2B       | -0.43 | 6.68E-01 | -1.01 | 8.44E-01 | -0.05 | 5.19E-01 |
| CCL15-CCL14  | -0.43 | 6.68E-01 | 0.85  | 1.99E-01 | -0.47 | 6.79E-01 |
| KLRC3        | -0.43 | 6.68E-01 | 0.07  | 4.73E-01 | 0.87  | 1.91E-01 |
| THNSL2       | -0.44 | 6.68E-01 | -0.27 | 6.07E-01 | 0.54  | 2.94E-01 |
| TNN          | -0.44 | 6.68E-01 | 0.25  | 4.00E-01 | -0.36 | 6.39E-01 |
| ZNF543       | -0.44 | 6.68E-01 | 0.31  | 3.79E-01 | -0.73 | 7.68E-01 |
| USP45        | -0.44 | 6.68E-01 | -0.17 | 5.69E-01 | -0.51 | 6.95E-01 |
| ZNF132       | -0.44 | 6.68E-01 | -0.21 | 5.84E-01 | -0.29 | 6.14E-01 |
| ATP5B        | -0.44 | 6.68E-01 | -0.19 | 5.77E-01 | -1.04 | 8.51E-01 |
| CDT1         | -0.44 | 6.68E-01 | 1.31  | 9.55E-02 | 0.00  | 4.98E-01 |
| ZFAND5       | -0.44 | 6.68E-01 | 0.50  | 3.10E-01 | -0.85 | 8.02E-01 |
| PXDN         | -0.44 | 6.68E-01 | -1.39 | 9.17E-01 | 0.75  | 2.26E-01 |
| CNTD2        | -0.44 | 6.68E-01 | -0.80 | 7.88E-01 | 0.77  | 2.19E-01 |
| ZNF487       | -0.44 | 6.68E-01 | 0.50  | 3.10E-01 | 0.76  | 2.24E-01 |
| BAMBI        | -0.44 | 6.68E-01 | 1.08  | 1.40E-01 | 0.06  | 4.76E-01 |
| DPPA3        | -0.44 | 6.68E-01 | -0.79 | 7.85E-01 | -0.36 | 6.39E-01 |
| SYNC         | -0.44 | 6.68E-01 | -0.80 | 7.89E-01 | -0.19 | 5.76E-01 |
| PPARG        | -0.44 | 6.68E-01 | -0.78 | 7.82E-01 | 1.01  | 1.56E-01 |
| SRPK2        | -0.44 | 6.69E-01 | -0.19 | 5.77E-01 | -1.13 | 8.71E-01 |
| SHISA2       | -0.44 | 6.69E-01 | -1.35 | 9.11E-01 | 0.00  | 5.01E-01 |
| POPDC2       | -0.44 | 6.69E-01 | 0.90  | 1.85E-01 | -1.27 | 8.98E-01 |
| TAAR8        | -0.44 | 6.69E-01 | 1.31  | 9.55E-02 | 0.81  | 2.10E-01 |



|          |       |          |       |          |       |          |
|----------|-------|----------|-------|----------|-------|----------|
| OMG      | -0.44 | 6.69E-01 | 0.32  | 3.76E-01 | 1.34  | 9.08E-02 |
| GNAT2    | -0.44 | 6.69E-01 | 0.49  | 3.11E-01 | -0.18 | 5.71E-01 |
| FBXO9    | -0.44 | 6.69E-01 | 0.40  | 3.46E-01 | -2.18 | 9.85E-01 |
| C9orf135 | -0.44 | 6.69E-01 | -1.44 | 9.25E-01 | -0.66 | 7.45E-01 |
| POLDIP2  | -0.44 | 6.69E-01 | -1.08 | 8.60E-01 | -0.71 | 7.61E-01 |
| ANKRD34B | -0.44 | 6.69E-01 | -0.77 | 7.78E-01 | -0.63 | 7.35E-01 |
| FAM69A   | -0.44 | 6.69E-01 | -0.27 | 6.05E-01 | 0.19  | 4.26E-01 |
| BMPR2    | -0.44 | 6.69E-01 | -0.28 | 6.12E-01 | -1.61 | 9.46E-01 |
| ARL1     | -0.44 | 6.69E-01 | -0.85 | 8.02E-01 | -0.43 | 6.67E-01 |
| PNRC2    | -0.44 | 6.69E-01 | 0.78  | 2.18E-01 | 0.18  | 4.29E-01 |
| KIAA1429 | -0.44 | 6.69E-01 | 1.23  | 1.10E-01 | 0.05  | 4.78E-01 |
| PANK4    | -0.44 | 6.69E-01 | -0.82 | 7.95E-01 | 0.21  | 4.18E-01 |
| ARHGAP26 | -0.44 | 6.69E-01 | 0.03  | 4.87E-01 | -0.68 | 7.53E-01 |
| IGFBP1   | -0.44 | 6.70E-01 | 0.29  | 3.86E-01 | -0.74 | 7.72E-01 |
| CACYBP   | -0.44 | 6.70E-01 | 0.93  | 1.77E-01 | 0.01  | 4.94E-01 |
| B9D2     | -0.44 | 6.70E-01 | 0.07  | 4.72E-01 | 0.09  | 4.62E-01 |
| TGFBI    | -0.44 | 6.70E-01 | -0.32 | 6.27E-01 | -0.05 | 5.19E-01 |
| FCRL1    | -0.44 | 6.70E-01 | -0.52 | 6.99E-01 | 0.75  | 2.27E-01 |
| FAM13B   | -0.44 | 6.70E-01 | -0.41 | 6.59E-01 | -0.31 | 6.22E-01 |
| KIF16B   | -0.44 | 6.70E-01 | 0.17  | 4.31E-01 | -2.25 | 9.88E-01 |
| DAB2IP   | -0.44 | 6.70E-01 | 0.41  | 3.42E-01 | -0.97 | 8.33E-01 |
| GUCY1A2  | -0.44 | 6.70E-01 | -0.49 | 6.90E-01 | -1.13 | 8.71E-01 |
| RARRES1  | -0.44 | 6.70E-01 | 0.13  | 4.47E-01 | -0.34 | 6.35E-01 |
| KRT84    | -0.44 | 6.70E-01 | -0.53 | 7.01E-01 | 0.51  | 3.04E-01 |
| CCER1    | -0.44 | 6.70E-01 | 0.31  | 3.79E-01 | -1.57 | 9.42E-01 |
| LMO1     | -0.44 | 6.70E-01 | -1.65 | 9.51E-01 | -0.03 | 5.12E-01 |
| TMEM5    | -0.44 | 6.71E-01 | 1.70  | 4.45E-02 | 1.63  | 5.18E-02 |
| MSC      | -0.44 | 6.71E-01 | 0.03  | 4.90E-01 | -0.86 | 8.06E-01 |
| ENDOU    | -0.44 | 6.71E-01 | 0.40  | 3.45E-01 | -1.51 | 9.34E-01 |
| TNKS     | -0.44 | 6.71E-01 | -1.17 | 8.80E-01 | 0.25  | 4.00E-01 |
| ZBTB48   | -0.44 | 6.71E-01 | 0.65  | 2.58E-01 | -0.63 | 7.36E-01 |

|              |       |          |       |          |       |          |
|--------------|-------|----------|-------|----------|-------|----------|
| TF           | -0.44 | 6.71E-01 | -0.12 | 5.48E-01 | -0.48 | 6.84E-01 |
| PHACTR3      | -0.44 | 6.71E-01 | -0.47 | 6.79E-01 | 1.29  | 9.79E-02 |
| PROSER1      | -0.44 | 6.71E-01 | -0.24 | 5.96E-01 | 0.45  | 3.26E-01 |
| C8B          | -0.44 | 6.71E-01 | -0.06 | 5.24E-01 | -1.25 | 8.94E-01 |
| LHX1         | -0.44 | 6.71E-01 | 0.09  | 4.62E-01 | -0.36 | 6.41E-01 |
| KIF2A        | -0.44 | 6.71E-01 | 1.05  | 1.46E-01 | -0.36 | 6.42E-01 |
| KRTAP1-3     | -0.44 | 6.71E-01 | -1.24 | 8.92E-01 | -0.19 | 5.77E-01 |
| TREX1        | -0.44 | 6.71E-01 | -0.55 | 7.09E-01 | 1.83  | 3.39E-02 |
| GPX8         | -0.44 | 6.71E-01 | -0.43 | 6.65E-01 | 0.72  | 2.37E-01 |
| C10orf85     | -0.44 | 6.71E-01 | 0.19  | 4.27E-01 | 0.90  | 1.83E-01 |
| NOC3L        | -0.44 | 6.71E-01 | -0.77 | 7.79E-01 | -0.47 | 6.83E-01 |
| ZNF112       | -0.44 | 6.71E-01 | -0.67 | 7.47E-01 | 0.25  | 4.02E-01 |
| GSPT1        | -0.44 | 6.71E-01 | -0.93 | 8.24E-01 | 0.39  | 3.50E-01 |
| SAMD9L       | -0.44 | 6.71E-01 | -0.15 | 5.60E-01 | -1.63 | 9.48E-01 |
| ASB8         | -0.44 | 6.72E-01 | -0.27 | 6.07E-01 | -1.50 | 9.33E-01 |
| TIMM21       | -0.44 | 6.72E-01 | -1.78 | 9.63E-01 | 0.60  | 2.76E-01 |
| KLHL1        | -0.44 | 6.72E-01 | -0.85 | 8.01E-01 | -0.24 | 5.94E-01 |
| OR10R2       | -0.44 | 6.72E-01 | 0.05  | 4.81E-01 | -0.59 | 7.21E-01 |
| KRTAP10-12   | -0.44 | 6.72E-01 | 0.54  | 2.95E-01 | 0.66  | 2.55E-01 |
| CD59         | -0.44 | 6.72E-01 | -0.88 | 8.09E-01 | 1.00  | 1.59E-01 |
| HMGCS1       | -0.44 | 6.72E-01 | -1.76 | 9.61E-01 | 0.12  | 4.54E-01 |
| DPP4         | -0.44 | 6.72E-01 | 0.33  | 3.71E-01 | -0.21 | 5.83E-01 |
| FO XK2       | -0.45 | 6.72E-01 | 0.24  | 4.05E-01 | -1.43 | 9.24E-01 |
| DRAXIN       | -0.45 | 6.72E-01 | -0.19 | 5.74E-01 | 2.36  | 9.03E-03 |
| ANGPT4       | -0.45 | 6.72E-01 | -0.02 | 5.07E-01 | -0.68 | 7.53E-01 |
| RP11-542P2.1 | -0.45 | 6.72E-01 | 0.28  | 3.91E-01 | -0.35 | 6.38E-01 |
| ZNF777       | -0.45 | 6.72E-01 | 0.80  | 2.12E-01 | -0.19 | 5.75E-01 |
| FAM24A       | -0.45 | 6.72E-01 | 0.88  | 1.91E-01 | 0.15  | 4.42E-01 |
| JPH4         | -0.45 | 6.72E-01 | -0.28 | 6.11E-01 | -0.46 | 6.78E-01 |
| DNAJB2       | -0.45 | 6.73E-01 | -1.50 | 9.33E-01 | -0.31 | 6.23E-01 |
| GDI2         | -0.45 | 6.73E-01 | -0.39 | 6.53E-01 | -0.33 | 6.28E-01 |

|          |       |          |       |          |       |          |
|----------|-------|----------|-------|----------|-------|----------|
| GIF      | -0.45 | 6.73E-01 | -0.65 | 7.43E-01 | -0.04 | 5.16E-01 |
| CTPS1    | -0.45 | 6.73E-01 | -0.25 | 5.99E-01 | -1.71 | 9.57E-01 |
| TMEM168  | -0.45 | 6.73E-01 | -1.57 | 9.41E-01 | 0.65  | 2.57E-01 |
| KRTAP5-3 | -0.45 | 6.73E-01 | 0.72  | 2.34E-01 | -0.46 | 6.78E-01 |
| ABCA12   | -0.45 | 6.73E-01 | -1.12 | 8.70E-01 | 0.56  | 2.89E-01 |
| CCL14    | -0.45 | 6.73E-01 | 0.85  | 1.99E-01 | -0.48 | 6.85E-01 |
| ARID4B   | -0.45 | 6.73E-01 | -0.53 | 7.04E-01 | -0.92 | 8.21E-01 |
| ZNF732   | -0.45 | 6.73E-01 | -0.48 | 6.83E-01 | -1.19 | 8.82E-01 |
| CMTR1    | -0.45 | 6.73E-01 | -1.21 | 8.87E-01 | 0.73  | 2.33E-01 |
| GAS1     | -0.45 | 6.73E-01 | -0.98 | 8.35E-01 | -1.11 | 8.66E-01 |
| USP54    | -0.45 | 6.73E-01 | -1.19 | 8.83E-01 | -0.38 | 6.48E-01 |
| EFNB3    | -0.45 | 6.73E-01 | 0.49  | 3.10E-01 | 0.41  | 3.43E-01 |
| NCKAP5   | -0.45 | 6.73E-01 | -1.34 | 9.09E-01 | 0.04  | 4.85E-01 |
| CD1B     | -0.45 | 6.73E-01 | -0.28 | 6.11E-01 | 0.49  | 3.11E-01 |
| DEFB116  | -0.45 | 6.73E-01 | 0.05  | 4.78E-01 | 1.04  | 1.49E-01 |
| ANXA1    | -0.45 | 6.74E-01 | -0.07 | 5.27E-01 | 2.03  | 2.14E-02 |
| SLC35C1  | -0.45 | 6.74E-01 | 0.15  | 4.40E-01 | 0.23  | 4.10E-01 |
| APBB3    | -0.45 | 6.74E-01 | -0.62 | 7.33E-01 | -0.67 | 7.48E-01 |
| KDEL3    | -0.45 | 6.74E-01 | 1.20  | 1.15E-01 | -0.26 | 6.04E-01 |
| HCN3     | -0.45 | 6.74E-01 | -0.24 | 5.95E-01 | -1.27 | 8.98E-01 |
| RGL1     | -0.45 | 6.74E-01 | 1.31  | 9.54E-02 | -0.67 | 7.49E-01 |
| ZNF266   | -0.45 | 6.74E-01 | -0.36 | 6.39E-01 | -1.38 | 9.16E-01 |
| THEG     | -0.45 | 6.74E-01 | -0.52 | 6.99E-01 | 0.27  | 3.94E-01 |
| PTPN23   | -0.45 | 6.74E-01 | -0.33 | 6.29E-01 | 0.71  | 2.40E-01 |
| LAD1     | -0.45 | 6.74E-01 | 0.07  | 4.73E-01 | -0.39 | 6.51E-01 |
| FKRP     | -0.45 | 6.74E-01 | -0.68 | 7.53E-01 | 0.48  | 3.15E-01 |
| BCAS4    | -0.45 | 6.74E-01 | -0.09 | 5.34E-01 | 0.09  | 4.66E-01 |
| SLC25A17 | -0.45 | 6.74E-01 | -0.80 | 7.88E-01 | 0.84  | 2.00E-01 |
| PIGS     | -0.45 | 6.74E-01 | -1.10 | 8.65E-01 | -0.05 | 5.19E-01 |
| P4HB     | -0.45 | 6.74E-01 | -0.35 | 6.36E-01 | -1.48 | 9.31E-01 |
| ILKAP    | -0.45 | 6.74E-01 | -0.79 | 7.86E-01 | 0.35  | 3.64E-01 |

|          |       |          |       |          |       |          |
|----------|-------|----------|-------|----------|-------|----------|
| SPRY1    | -0.45 | 6.74E-01 | -1.15 | 8.75E-01 | -0.55 | 7.09E-01 |
| HOXA2    | -0.45 | 6.74E-01 | 1.24  | 1.07E-01 | 0.44  | 3.31E-01 |
| TNFRSF4  | -0.45 | 6.74E-01 | -2.63 | 9.96E-01 | -0.22 | 5.87E-01 |
| SLC25A4  | -0.45 | 6.74E-01 | -0.10 | 5.40E-01 | -0.28 | 6.10E-01 |
| SBP1     | -0.45 | 6.75E-01 | -0.56 | 7.12E-01 | -1.47 | 9.29E-01 |
| TRAPPC10 | -0.45 | 6.75E-01 | -0.28 | 6.11E-01 | -0.60 | 7.26E-01 |
| SRA1     | -0.45 | 6.75E-01 | -0.64 | 7.38E-01 | -0.15 | 5.59E-01 |
| PRSS33   | -0.45 | 6.75E-01 | -0.96 | 8.30E-01 | 0.28  | 3.90E-01 |
| PCID2    | -0.45 | 6.75E-01 | -0.31 | 6.23E-01 | -0.69 | 7.53E-01 |
| ATP5SL   | -0.45 | 6.75E-01 | 0.28  | 3.91E-01 | 0.91  | 1.82E-01 |
| DNAI2    | -0.45 | 6.75E-01 | -0.36 | 6.39E-01 | -0.97 | 8.34E-01 |
| KBTBD11  | -0.45 | 6.75E-01 | -1.35 | 9.12E-01 | 0.02  | 4.92E-01 |
| MZF1     | -0.45 | 6.75E-01 | -1.67 | 9.53E-01 | -0.17 | 5.69E-01 |
| C22orf26 | -0.45 | 6.75E-01 | -0.27 | 6.06E-01 | -0.55 | 7.10E-01 |
| SMC6     | -0.45 | 6.75E-01 | -0.88 | 8.10E-01 | 2.16  | 1.55E-02 |
| CHST6    | -0.45 | 6.75E-01 | -0.35 | 6.37E-01 | 0.04  | 4.83E-01 |
| SHKBP1   | -0.45 | 6.75E-01 | -1.22 | 8.89E-01 | 0.16  | 4.36E-01 |
| NIFK     | -0.45 | 6.75E-01 | -0.91 | 8.19E-01 | 0.10  | 4.59E-01 |
| MFSD6L   | -0.45 | 6.75E-01 | -1.01 | 8.45E-01 | -0.83 | 7.98E-01 |
| CHMP2A   | -0.46 | 6.75E-01 | -1.51 | 9.35E-01 | -0.39 | 6.51E-01 |
| FNDC3B   | -0.46 | 6.75E-01 | 0.27  | 3.95E-01 | -0.63 | 7.37E-01 |
| BORA     | -0.46 | 6.75E-01 | -0.26 | 6.02E-01 | 0.00  | 4.98E-01 |
| TCEB3    | -0.46 | 6.76E-01 | -0.09 | 5.37E-01 | 0.56  | 2.86E-01 |
| LHPP     | -0.46 | 6.76E-01 | 0.57  | 2.86E-01 | -0.88 | 8.11E-01 |
| DNAH1    | -0.46 | 6.76E-01 | -0.79 | 7.87E-01 | 0.23  | 4.11E-01 |
| AK4      | -0.46 | 6.76E-01 | -0.59 | 7.21E-01 | 0.17  | 4.32E-01 |
| SELK     | -0.46 | 6.76E-01 | -1.39 | 9.17E-01 | 0.41  | 3.40E-01 |
| FAM219A  | -0.46 | 6.76E-01 | -0.49 | 6.88E-01 | 0.29  | 3.84E-01 |
| ZNF444   | -0.46 | 6.76E-01 | -1.25 | 8.94E-01 | -0.07 | 5.27E-01 |
| COPS8    | -0.46 | 6.76E-01 | -0.08 | 5.31E-01 | 1.04  | 1.48E-01 |
| MOS      | -0.46 | 6.76E-01 | -0.38 | 6.50E-01 | -1.04 | 8.50E-01 |

|          |       |          |       |          |       |          |
|----------|-------|----------|-------|----------|-------|----------|
| TRAPPC12 | -0.46 | 6.76E-01 | -0.76 | 7.76E-01 | 0.58  | 2.82E-01 |
| SLC25A36 | -0.46 | 6.76E-01 | 0.17  | 4.32E-01 | -0.76 | 7.76E-01 |
| PDLIM5   | -0.46 | 6.76E-01 | 0.29  | 3.85E-01 | 0.35  | 3.62E-01 |
| PBX1     | -0.46 | 6.76E-01 | -0.91 | 8.19E-01 | -0.03 | 5.11E-01 |
| MEGF9    | -0.46 | 6.76E-01 | -0.29 | 6.16E-01 | -1.02 | 8.45E-01 |
| BBS10    | -0.46 | 6.76E-01 | -1.11 | 8.67E-01 | -0.20 | 5.78E-01 |
| ITGA6    | -0.46 | 6.76E-01 | 0.61  | 2.69E-01 | -0.09 | 5.36E-01 |
| SGPL1    | -0.46 | 6.76E-01 | -0.61 | 7.28E-01 | -0.94 | 8.26E-01 |
| FDCSP    | -0.46 | 6.76E-01 | -1.06 | 8.55E-01 | -0.83 | 7.97E-01 |
| LEFTY2   | -0.46 | 6.76E-01 | -1.66 | 9.52E-01 | -0.03 | 5.11E-01 |
| SLC19A2  | -0.46 | 6.76E-01 | 0.71  | 2.39E-01 | 0.28  | 3.88E-01 |
| MRPS12   | -0.46 | 6.77E-01 | -0.15 | 5.59E-01 | -2.35 | 9.91E-01 |
| ZDHHC4   | -0.46 | 6.77E-01 | -0.37 | 6.43E-01 | -0.47 | 6.82E-01 |
| ASUN     | -0.46 | 6.77E-01 | 0.30  | 3.84E-01 | -1.08 | 8.60E-01 |
| TTC23L   | -0.46 | 6.77E-01 | 1.04  | 1.48E-01 | -0.73 | 7.67E-01 |
| GABRA2   | -0.46 | 6.77E-01 | -0.20 | 5.78E-01 | -1.35 | 9.12E-01 |
| DNASE1   | -0.46 | 6.77E-01 | -0.19 | 5.75E-01 | -0.97 | 8.34E-01 |
| TRAFD1   | -0.46 | 6.77E-01 | -0.99 | 8.40E-01 | -0.54 | 7.04E-01 |
| IFT52    | -0.46 | 6.77E-01 | 0.93  | 1.76E-01 | -0.30 | 6.20E-01 |
| C9orf78  | -0.46 | 6.77E-01 | -0.07 | 5.29E-01 | 0.95  | 1.70E-01 |
| PDLIM4   | -0.46 | 6.77E-01 | 0.43  | 3.33E-01 | 0.46  | 3.24E-01 |
| APLF     | -0.46 | 6.77E-01 | -0.60 | 7.26E-01 | 1.27  | 1.03E-01 |
| VSIG10   | -0.46 | 6.77E-01 | -1.60 | 9.45E-01 | -0.45 | 6.73E-01 |
| DTWD2    | -0.46 | 6.77E-01 | -0.22 | 5.88E-01 | -0.19 | 5.74E-01 |
| NGDN     | -0.46 | 6.77E-01 | -0.29 | 6.15E-01 | 0.29  | 3.87E-01 |
| ABCC8    | -0.46 | 6.77E-01 | -0.35 | 6.39E-01 | -0.80 | 7.87E-01 |
| TMEM199  | -0.46 | 6.77E-01 | -0.51 | 6.94E-01 | -1.01 | 8.44E-01 |
| LTV1     | -0.46 | 6.77E-01 | -0.91 | 8.18E-01 | -0.75 | 7.74E-01 |
| PRPF8    | -0.46 | 6.77E-01 | -0.51 | 6.95E-01 | -0.85 | 8.01E-01 |
| GABRG2   | -0.46 | 6.77E-01 | -0.03 | 5.14E-01 | 1.02  | 1.53E-01 |
| FAM169B  | -0.46 | 6.77E-01 | 1.15  | 1.26E-01 | 0.11  | 4.57E-01 |

|           |       |          |       |          |       |          |
|-----------|-------|----------|-------|----------|-------|----------|
| LYSMD2    | -0.46 | 6.78E-01 | -1.67 | 9.53E-01 | 0.39  | 3.50E-01 |
| MLKL      | -0.46 | 6.78E-01 | 0.15  | 4.40E-01 | -1.09 | 8.62E-01 |
| OPTC      | -0.46 | 6.78E-01 | -0.63 | 7.36E-01 | -0.26 | 6.02E-01 |
| ZNF738    | -0.46 | 6.78E-01 | 0.46  | 3.22E-01 | -0.80 | 7.89E-01 |
| OR2J2     | -0.46 | 6.78E-01 | -0.35 | 6.38E-01 | -0.76 | 7.77E-01 |
| NAA40     | -0.46 | 6.78E-01 | -0.47 | 6.82E-01 | -1.08 | 8.60E-01 |
| ARHGEF33  | -0.46 | 6.78E-01 | 0.33  | 3.72E-01 | -0.57 | 7.14E-01 |
| ARMC9     | -0.46 | 6.78E-01 | -0.30 | 6.18E-01 | -1.19 | 8.84E-01 |
| ARRB2     | -0.46 | 6.78E-01 | 0.56  | 2.88E-01 | -0.70 | 7.59E-01 |
| DMRTA1    | -0.46 | 6.78E-01 | 0.48  | 3.15E-01 | -0.24 | 5.93E-01 |
| HGS       | -0.46 | 6.78E-01 | -0.69 | 7.56E-01 | -0.69 | 7.54E-01 |
| DNAJB9    | -0.46 | 6.78E-01 | -0.16 | 5.65E-01 | -0.99 | 8.39E-01 |
| POC1B     | -0.46 | 6.79E-01 | -0.83 | 7.98E-01 | -0.39 | 6.53E-01 |
| BAIAP2    | -0.46 | 6.79E-01 | -0.47 | 6.82E-01 | 0.07  | 4.73E-01 |
| BRIX1     | -0.46 | 6.79E-01 | 0.82  | 2.06E-01 | -1.68 | 9.53E-01 |
| FLCN      | -0.46 | 6.79E-01 | -0.50 | 6.91E-01 | -0.25 | 5.99E-01 |
| SAV1      | -0.46 | 6.79E-01 | 1.21  | 1.14E-01 | -0.78 | 7.82E-01 |
| IQCF6     | -0.46 | 6.79E-01 | -1.04 | 8.52E-01 | 0.51  | 3.06E-01 |
| DNPEP     | -0.46 | 6.79E-01 | 0.26  | 3.97E-01 | 0.44  | 3.30E-01 |
| CAPN10    | -0.46 | 6.79E-01 | 0.05  | 4.78E-01 | -1.04 | 8.52E-01 |
| SPAG5     | -0.47 | 6.79E-01 | 0.28  | 3.91E-01 | -0.75 | 7.73E-01 |
| TOP1      | -0.47 | 6.79E-01 | 1.13  | 1.29E-01 | -1.80 | 9.64E-01 |
| ADIPOQ    | -0.47 | 6.79E-01 | 1.02  | 1.53E-01 | -2.20 | 9.86E-01 |
| RARA      | -0.47 | 6.79E-01 | -0.49 | 6.89E-01 | -1.06 | 8.56E-01 |
| SPATA25   | -0.47 | 6.79E-01 | -0.55 | 7.09E-01 | -1.00 | 8.42E-01 |
| PROZ      | -0.47 | 6.79E-01 | 0.05  | 4.80E-01 | -0.74 | 7.71E-01 |
| KRTAP10-5 | -0.47 | 6.79E-01 | -0.84 | 7.99E-01 | -0.62 | 7.31E-01 |
| SEC14L6   | -0.47 | 6.79E-01 | 0.29  | 3.84E-01 | -1.36 | 9.13E-01 |
| AGAP2-AS1 | -0.47 | 6.79E-01 | -0.12 | 5.48E-01 | -1.83 | 9.66E-01 |
| ZWINT     | -0.47 | 6.80E-01 | -0.61 | 7.28E-01 | 0.54  | 2.94E-01 |
| NOD1      | -0.47 | 6.80E-01 | -1.57 | 9.42E-01 | 0.03  | 4.89E-01 |

|          |       |          |       |          |       |          |
|----------|-------|----------|-------|----------|-------|----------|
| TLL10    | -0.47 | 6.80E-01 | 0.06  | 4.78E-01 | -1.56 | 9.40E-01 |
| RGL4     | -0.47 | 6.80E-01 | -1.45 | 9.26E-01 | -0.11 | 5.43E-01 |
| TRAM1L1  | -0.47 | 6.80E-01 | -0.66 | 7.46E-01 | -1.35 | 9.11E-01 |
| DCTN5    | -0.47 | 6.80E-01 | -0.10 | 5.40E-01 | -1.06 | 8.56E-01 |
| EXD1     | -0.47 | 6.80E-01 | -0.48 | 6.84E-01 | -1.28 | 9.00E-01 |
| SLC24A4  | -0.47 | 6.80E-01 | -0.11 | 5.42E-01 | -0.45 | 6.74E-01 |
| SRGAP2   | -0.47 | 6.80E-01 | -0.34 | 6.34E-01 | -1.80 | 9.64E-01 |
| GRN      | -0.47 | 6.80E-01 | -0.11 | 5.43E-01 | -0.06 | 5.25E-01 |
| TAC1     | -0.47 | 6.80E-01 | -1.38 | 9.16E-01 | -0.16 | 5.62E-01 |
| KDEL2    | -0.47 | 6.80E-01 | -0.89 | 8.13E-01 | -0.28 | 6.09E-01 |
| CALHM2   | -0.47 | 6.80E-01 | 0.39  | 3.47E-01 | 0.99  | 1.62E-01 |
| EFHC1    | -0.47 | 6.80E-01 | -1.85 | 9.68E-01 | 0.19  | 4.23E-01 |
| FAM73B   | -0.47 | 6.80E-01 | 0.15  | 4.40E-01 | -1.22 | 8.88E-01 |
| MED16    | -0.47 | 6.80E-01 | -1.99 | 9.77E-01 | 0.71  | 2.40E-01 |
| MUM1     | -0.47 | 6.80E-01 | 1.94  | 2.59E-02 | -0.19 | 5.76E-01 |
| OR4A47   | -0.47 | 6.81E-01 | -0.41 | 6.61E-01 | 0.51  | 3.06E-01 |
| COMMD1   | -0.47 | 6.81E-01 | 0.70  | 2.43E-01 | -1.43 | 9.23E-01 |
| OTUD7A   | -0.47 | 6.81E-01 | -0.48 | 6.83E-01 | -1.23 | 8.91E-01 |
| DNAH14   | -0.47 | 6.81E-01 | -0.73 | 7.66E-01 | -1.04 | 8.50E-01 |
| NOL8     | -0.47 | 6.81E-01 | 0.02  | 4.94E-01 | -1.59 | 9.44E-01 |
| ANGPTL2  | -0.47 | 6.81E-01 | -0.93 | 8.24E-01 | -0.75 | 7.73E-01 |
| FSIP2    | -0.47 | 6.81E-01 | -0.17 | 5.69E-01 | -0.96 | 8.30E-01 |
| CAMTA2   | -0.47 | 6.81E-01 | 0.36  | 3.59E-01 | 0.72  | 2.34E-01 |
| PINK1    | -0.47 | 6.81E-01 | -0.70 | 7.60E-01 | -0.78 | 7.83E-01 |
| CD84     | -0.47 | 6.81E-01 | 0.53  | 2.97E-01 | 0.69  | 2.45E-01 |
| LINGO1   | -0.47 | 6.81E-01 | -1.12 | 8.68E-01 | -0.21 | 5.84E-01 |
| ARHGAP29 | -0.47 | 6.81E-01 | -0.86 | 8.06E-01 | -0.10 | 5.40E-01 |
| AXIN2    | -0.47 | 6.81E-01 | 1.65  | 4.91E-02 | 1.27  | 1.01E-01 |
| LGALS1   | -0.47 | 6.81E-01 | -0.96 | 8.32E-01 | -0.95 | 8.29E-01 |
| PLEK2    | -0.47 | 6.82E-01 | 0.41  | 3.42E-01 | 0.25  | 4.00E-01 |
| KIR3DL1  | -0.47 | 6.82E-01 | 0.66  | 2.54E-01 | -0.15 | 5.59E-01 |

|           |       |          |       |          |       |          |
|-----------|-------|----------|-------|----------|-------|----------|
| RNF141    | -0.47 | 6.82E-01 | -0.32 | 6.25E-01 | 0.24  | 4.05E-01 |
| GGN       | -0.47 | 6.82E-01 | 0.41  | 3.41E-01 | -0.91 | 8.19E-01 |
| CSPG5     | -0.47 | 6.82E-01 | -0.40 | 6.54E-01 | 0.95  | 1.70E-01 |
| PRC1      | -0.47 | 6.82E-01 | 0.61  | 2.70E-01 | -0.32 | 6.25E-01 |
| PI3       | -0.47 | 6.82E-01 | -1.42 | 9.23E-01 | -0.78 | 7.82E-01 |
| PRDM14    | -0.47 | 6.82E-01 | 0.05  | 4.81E-01 | -0.46 | 6.77E-01 |
| OR10V1    | -0.47 | 6.82E-01 | 0.03  | 4.90E-01 | -1.32 | 9.07E-01 |
| PCF11     | -0.47 | 6.82E-01 | -0.77 | 7.79E-01 | 1.21  | 1.14E-01 |
| CAB39     | -0.47 | 6.82E-01 | -0.77 | 7.81E-01 | -0.34 | 6.34E-01 |
| ENPP5     | -0.47 | 6.82E-01 | -0.75 | 7.75E-01 | 0.24  | 4.05E-01 |
| IL21R     | -0.47 | 6.83E-01 | -1.08 | 8.59E-01 | -0.78 | 7.83E-01 |
| C17orf102 | -0.47 | 6.83E-01 | 0.89  | 1.87E-01 | -0.79 | 7.85E-01 |
| STMN3     | -0.47 | 6.83E-01 | -0.09 | 5.37E-01 | -0.27 | 6.05E-01 |
| SMKR1     | -0.47 | 6.83E-01 | -0.06 | 5.23E-01 | -0.34 | 6.33E-01 |
| CYP2C8    | -0.47 | 6.83E-01 | 1.63  | 5.12E-02 | -0.08 | 5.31E-01 |
| RNF180    | -0.47 | 6.83E-01 | -1.05 | 8.52E-01 | 0.16  | 4.37E-01 |
| TNFSF4    | -0.48 | 6.83E-01 | 0.78  | 2.18E-01 | -0.42 | 6.63E-01 |
| NR1I2     | -0.48 | 6.83E-01 | 2.19  | 1.43E-02 | 0.72  | 2.36E-01 |
| GOT1L1    | -0.48 | 6.83E-01 | -1.10 | 8.65E-01 | 0.14  | 4.43E-01 |
| OR5H15    | -0.48 | 6.83E-01 | -2.21 | 9.86E-01 | -0.04 | 5.14E-01 |
| EPN1      | -0.48 | 6.83E-01 | 0.17  | 4.34E-01 | -1.58 | 9.43E-01 |
| AGBL1     | -0.48 | 6.83E-01 | -0.95 | 8.29E-01 | 0.87  | 1.93E-01 |
| HHIPL1    | -0.48 | 6.83E-01 | -0.55 | 7.09E-01 | 0.65  | 2.58E-01 |
| LMOD3     | -0.48 | 6.83E-01 | -1.92 | 9.72E-01 | 0.49  | 3.11E-01 |
| DMXL1     | -0.48 | 6.83E-01 | -0.99 | 8.39E-01 | -0.01 | 5.03E-01 |
| C17orf62  | -0.48 | 6.83E-01 | -0.71 | 7.63E-01 | -0.53 | 7.01E-01 |
| THBS3     | -0.48 | 6.83E-01 | -0.61 | 7.30E-01 | -0.30 | 6.17E-01 |
| KIF20A    | -0.48 | 6.83E-01 | -0.66 | 7.44E-01 | 0.28  | 3.89E-01 |
| LRRRC8B   | -0.48 | 6.83E-01 | 0.74  | 2.29E-01 | -0.57 | 7.16E-01 |
| CPSF3L    | -0.48 | 6.83E-01 | -0.25 | 5.99E-01 | -0.87 | 8.07E-01 |
| C15orf61  | -0.48 | 6.83E-01 | -0.48 | 6.85E-01 | -0.53 | 7.02E-01 |



|           |       |          |       |          |       |          |
|-----------|-------|----------|-------|----------|-------|----------|
| ZFP3      | -0.48 | 6.83E-01 | -0.08 | 5.33E-01 | -1.06 | 8.56E-01 |
| ARAP1     | -0.48 | 6.83E-01 | -0.84 | 7.99E-01 | 1.02  | 1.54E-01 |
| KLHDC1    | -0.48 | 6.83E-01 | -1.10 | 8.65E-01 | -0.81 | 7.92E-01 |
| AOC1      | -0.48 | 6.83E-01 | -0.83 | 7.97E-01 | -1.19 | 8.84E-01 |
| AMPD1     | -0.48 | 6.83E-01 | -1.20 | 8.85E-01 | -0.95 | 8.29E-01 |
| E4F1      | -0.48 | 6.83E-01 | -0.31 | 6.21E-01 | -0.88 | 8.11E-01 |
| TGFBR1    | -0.48 | 6.84E-01 | -0.47 | 6.81E-01 | -0.34 | 6.32E-01 |
| CES1      | -0.48 | 6.84E-01 | -0.10 | 5.40E-01 | -0.04 | 5.16E-01 |
| HSF5      | -0.48 | 6.84E-01 | 0.19  | 4.25E-01 | -0.18 | 5.73E-01 |
| NEFM      | -0.48 | 6.84E-01 | -0.20 | 5.79E-01 | 0.82  | 2.06E-01 |
| TMEM132B  | -0.48 | 6.84E-01 | 0.24  | 4.03E-01 | -1.82 | 9.66E-01 |
| PCP2      | -0.48 | 6.84E-01 | -0.72 | 7.65E-01 | -0.11 | 5.44E-01 |
| SLC6A3    | -0.48 | 6.84E-01 | -1.16 | 8.77E-01 | 0.71  | 2.38E-01 |
| FAM117B   | -0.48 | 6.84E-01 | -0.35 | 6.36E-01 | -1.72 | 9.57E-01 |
| RANBP17   | -0.48 | 6.84E-01 | 0.37  | 3.56E-01 | -1.73 | 9.58E-01 |
| F13B      | -0.48 | 6.84E-01 | -1.32 | 9.07E-01 | -0.31 | 6.20E-01 |
| KCNN3     | -0.48 | 6.84E-01 | 0.08  | 4.69E-01 | -0.28 | 6.11E-01 |
| AKNA      | -0.48 | 6.84E-01 | -0.39 | 6.53E-01 | -1.33 | 9.09E-01 |
| CERK      | -0.48 | 6.84E-01 | 0.13  | 4.48E-01 | 0.27  | 3.92E-01 |
| HAS2      | -0.48 | 6.84E-01 | 0.86  | 1.95E-01 | 0.15  | 4.41E-01 |
| RNF219    | -0.48 | 6.84E-01 | 0.52  | 3.02E-01 | 1.04  | 1.48E-01 |
| JMJD6     | -0.48 | 6.84E-01 | 0.60  | 2.73E-01 | -1.05 | 8.53E-01 |
| HSDL1     | -0.48 | 6.84E-01 | 1.03  | 1.51E-01 | 1.93  | 2.66E-02 |
| CDC23     | -0.48 | 6.84E-01 | -0.90 | 8.16E-01 | 0.19  | 4.26E-01 |
| HSPA13    | -0.48 | 6.84E-01 | -0.66 | 7.47E-01 | 0.26  | 3.98E-01 |
| RFESD     | -0.48 | 6.84E-01 | 0.45  | 3.27E-01 | 0.07  | 4.73E-01 |
| KRTAP21-2 | -0.48 | 6.84E-01 | -1.61 | 9.46E-01 | -0.01 | 5.02E-01 |
| RNLS      | -0.48 | 6.84E-01 | 0.19  | 4.23E-01 | 0.35  | 3.62E-01 |
| TOP2A     | -0.48 | 6.85E-01 | -0.80 | 7.88E-01 | -0.98 | 8.37E-01 |
| CLEC16A   | -0.48 | 6.85E-01 | -0.50 | 6.91E-01 | 0.66  | 2.54E-01 |
| NIT1      | -0.48 | 6.85E-01 | 0.90  | 1.84E-01 | 0.48  | 3.17E-01 |

|               |       |          |       |          |       |          |
|---------------|-------|----------|-------|----------|-------|----------|
| CENPK         | -0.48 | 6.85E-01 | -0.80 | 7.87E-01 | -0.02 | 5.07E-01 |
| PACSIN2       | -0.48 | 6.85E-01 | -1.02 | 8.46E-01 | 0.60  | 2.75E-01 |
| ZFAND2B       | -0.48 | 6.85E-01 | -0.20 | 5.81E-01 | -1.07 | 8.57E-01 |
| CPQ           | -0.48 | 6.85E-01 | 0.01  | 4.95E-01 | 0.05  | 4.81E-01 |
| ANKRD52       | -0.48 | 6.85E-01 | 0.42  | 3.37E-01 | 1.49  | 6.78E-02 |
| UBR3          | -0.48 | 6.85E-01 | -0.90 | 8.15E-01 | 0.80  | 2.12E-01 |
| TUBG2         | -0.48 | 6.85E-01 | -1.08 | 8.60E-01 | -0.93 | 8.24E-01 |
| CAPNS2        | -0.48 | 6.85E-01 | -1.41 | 9.20E-01 | -0.33 | 6.29E-01 |
| GREB1L        | -0.48 | 6.85E-01 | -0.07 | 5.26E-01 | -1.27 | 8.99E-01 |
| FAM214B       | -0.48 | 6.85E-01 | 0.02  | 4.92E-01 | 0.93  | 1.77E-01 |
| RBMS1         | -0.48 | 6.85E-01 | 0.21  | 4.17E-01 | -0.46 | 6.79E-01 |
| PAFAH2        | -0.48 | 6.86E-01 | -0.41 | 6.60E-01 | 0.42  | 3.37E-01 |
| KLK5          | -0.48 | 6.86E-01 | 0.07  | 4.72E-01 | -1.07 | 8.58E-01 |
| TRAF1         | -0.48 | 6.86E-01 | -0.41 | 6.60E-01 | -0.45 | 6.73E-01 |
| HSDL2         | -0.48 | 6.86E-01 | -0.54 | 7.05E-01 | 0.37  | 3.55E-01 |
| ATP6V0B       | -0.48 | 6.86E-01 | 0.89  | 1.86E-01 | -1.35 | 9.12E-01 |
| KCNH6         | -0.48 | 6.86E-01 | -0.85 | 8.03E-01 | -0.94 | 8.26E-01 |
| GGA2          | -0.48 | 6.86E-01 | 0.22  | 4.13E-01 | 0.21  | 4.18E-01 |
| UGCG          | -0.48 | 6.86E-01 | 0.13  | 4.47E-01 | -1.16 | 8.77E-01 |
| UBL3          | -0.48 | 6.86E-01 | -0.52 | 6.98E-01 | -1.45 | 9.26E-01 |
| CTD-2054N24.2 | -0.49 | 6.86E-01 | -0.68 | 7.52E-01 | -0.46 | 6.78E-01 |
| TBC1D22B      | -0.49 | 6.86E-01 | 0.58  | 2.82E-01 | 1.27  | 1.03E-01 |
| HSPH1         | -0.49 | 6.86E-01 | 0.60  | 2.74E-01 | -0.09 | 5.35E-01 |
| CALU          | -0.49 | 6.86E-01 | -1.52 | 9.36E-01 | 0.40  | 3.44E-01 |
| CST6          | -0.49 | 6.87E-01 | -1.06 | 8.56E-01 | -0.09 | 5.35E-01 |
| RHPN2         | -0.49 | 6.87E-01 | 0.82  | 2.06E-01 | -1.81 | 9.65E-01 |
| SETD2         | -0.49 | 6.87E-01 | -0.67 | 7.47E-01 | 0.44  | 3.28E-01 |
| CCDC136       | -0.49 | 6.87E-01 | -1.03 | 8.48E-01 | -0.45 | 6.74E-01 |
| C5AR2         | -0.49 | 6.87E-01 | 0.43  | 3.35E-01 | 0.12  | 4.54E-01 |
| SUCLG1        | -0.49 | 6.87E-01 | -0.27 | 6.07E-01 | -1.06 | 8.55E-01 |
| SIGLEC1       | -0.49 | 6.87E-01 | -0.74 | 7.72E-01 | -0.53 | 7.01E-01 |

|               |       |          |       |          |       |          |
|---------------|-------|----------|-------|----------|-------|----------|
| B3GNT4        | -0.49 | 6.87E-01 | -0.37 | 6.45E-01 | -0.13 | 5.53E-01 |
| ADAT2         | -0.49 | 6.87E-01 | -1.76 | 9.60E-01 | -0.33 | 6.30E-01 |
| FER1L6        | -0.49 | 6.87E-01 | -0.71 | 7.61E-01 | 0.42  | 3.37E-01 |
| TMEM259       | -0.49 | 6.87E-01 | 0.16  | 4.35E-01 | 1.17  | 1.20E-01 |
| KLHL17        | -0.49 | 6.87E-01 | -1.41 | 9.20E-01 | 0.08  | 4.70E-01 |
| CELA3B        | -0.49 | 6.87E-01 | -0.17 | 5.67E-01 | -0.11 | 5.42E-01 |
| ST18          | -0.49 | 6.87E-01 | 0.63  | 2.66E-01 | 0.46  | 3.22E-01 |
| AICDA         | -0.49 | 6.87E-01 | -0.43 | 6.66E-01 | -1.31 | 9.05E-01 |
| AKIRIN1       | -0.49 | 6.88E-01 | 0.22  | 4.12E-01 | 0.33  | 3.71E-01 |
| GORASP2       | -0.49 | 6.88E-01 | -0.68 | 7.51E-01 | 1.05  | 1.47E-01 |
| ABI3BP        | -0.49 | 6.88E-01 | 0.06  | 4.77E-01 | 0.28  | 3.88E-01 |
| RSL1D1        | -0.49 | 6.88E-01 | -1.63 | 9.49E-01 | 0.47  | 3.18E-01 |
| HPR           | -0.49 | 6.88E-01 | -0.01 | 5.04E-01 | 0.41  | 3.40E-01 |
| C22orf42      | -0.49 | 6.88E-01 | 0.34  | 3.67E-01 | -0.07 | 5.29E-01 |
| ATG4B         | -0.49 | 6.88E-01 | 0.60  | 2.73E-01 | -0.87 | 8.08E-01 |
| P2RY6         | -0.49 | 6.88E-01 | 0.79  | 2.16E-01 | 1.63  | 5.17E-02 |
| LOH12CR1      | -0.49 | 6.88E-01 | -1.44 | 9.25E-01 | -0.32 | 6.26E-01 |
| ZNF326        | -0.49 | 6.88E-01 | -0.62 | 7.34E-01 | -0.59 | 7.21E-01 |
| RLF           | -0.49 | 6.88E-01 | -0.60 | 7.25E-01 | -0.61 | 7.28E-01 |
| RABGGTA       | -0.49 | 6.88E-01 | -0.51 | 6.94E-01 | -0.35 | 6.36E-01 |
| TBPL1         | -0.49 | 6.88E-01 | -0.21 | 5.82E-01 | -1.19 | 8.83E-01 |
| SKAP1         | -0.49 | 6.88E-01 | 1.13  | 1.30E-01 | 0.99  | 1.61E-01 |
| CYP8B1        | -0.49 | 6.88E-01 | 0.19  | 4.23E-01 | 1.35  | 8.91E-02 |
| STAU2         | -0.49 | 6.88E-01 | -0.38 | 6.49E-01 | -1.45 | 9.27E-01 |
| BAI2          | -0.49 | 6.88E-01 | -1.05 | 8.54E-01 | -0.12 | 5.50E-01 |
| DBNDD1        | -0.49 | 6.88E-01 | -0.40 | 6.56E-01 | -0.52 | 6.99E-01 |
| EMX2          | -0.49 | 6.89E-01 | -0.51 | 6.93E-01 | 0.54  | 2.96E-01 |
| IL1RN         | -0.49 | 6.89E-01 | -0.92 | 8.21E-01 | -0.68 | 7.53E-01 |
| DKFZP779L1853 | -0.49 | 6.89E-01 | -1.28 | 9.00E-01 | -0.46 | 6.79E-01 |
| HNRNPDL       | -0.49 | 6.89E-01 | -0.17 | 5.67E-01 | -1.23 | 8.91E-01 |
| RHBDD1        | -0.49 | 6.89E-01 | 0.36  | 3.61E-01 | 0.10  | 4.59E-01 |

|          |       |          |       |          |       |          |
|----------|-------|----------|-------|----------|-------|----------|
| APBA1    | -0.49 | 6.89E-01 | -0.90 | 8.15E-01 | -0.64 | 7.40E-01 |
| LONRF2   | -0.49 | 6.89E-01 | 0.35  | 3.63E-01 | -0.62 | 7.33E-01 |
| FAM132B  | -0.49 | 6.89E-01 | -0.43 | 6.66E-01 | -0.34 | 6.32E-01 |
| OMD      | -0.49 | 6.89E-01 | 0.00  | 4.99E-01 | -1.52 | 9.36E-01 |
| ZNF714   | -0.49 | 6.89E-01 | -0.94 | 8.28E-01 | -0.49 | 6.86E-01 |
| TEAD2    | -0.49 | 6.89E-01 | -1.31 | 9.06E-01 | 0.23  | 4.11E-01 |
| PRDM6    | -0.49 | 6.89E-01 | -0.53 | 7.01E-01 | -2.05 | 9.80E-01 |
| ITPR1    | -0.49 | 6.89E-01 | 1.14  | 1.28E-01 | -0.41 | 6.60E-01 |
| RPRML    | -0.49 | 6.90E-01 | -0.05 | 5.21E-01 | 0.86  | 1.95E-01 |
| FANCD2   | -0.49 | 6.90E-01 | -0.99 | 8.40E-01 | -0.42 | 6.62E-01 |
| PRPSAP1  | -0.49 | 6.90E-01 | -0.40 | 6.54E-01 | -0.57 | 7.17E-01 |
| OR8S1    | -0.49 | 6.90E-01 | -0.37 | 6.43E-01 | 0.02  | 4.92E-01 |
| APC      | -0.49 | 6.90E-01 | -0.63 | 7.35E-01 | 1.60  | 5.54E-02 |
| KCNMA1   | -0.49 | 6.90E-01 | 1.12  | 1.31E-01 | 0.30  | 3.81E-01 |
| SLC7A6OS | -0.50 | 6.90E-01 | -0.32 | 6.27E-01 | 1.18  | 1.20E-01 |
| VGLL3    | -0.50 | 6.90E-01 | -0.60 | 7.25E-01 | -0.68 | 7.52E-01 |
| MAZ      | -0.50 | 6.90E-01 | -0.62 | 7.34E-01 | -0.57 | 7.14E-01 |
| C13orf35 | -0.50 | 6.90E-01 | -0.13 | 5.51E-01 | -0.66 | 7.47E-01 |
| FRA10AC1 | -0.50 | 6.90E-01 | -1.14 | 8.73E-01 | 0.13  | 4.48E-01 |
| FAM78A   | -0.50 | 6.90E-01 | 1.05  | 1.46E-01 | -0.49 | 6.88E-01 |
| CCDC9    | -0.50 | 6.90E-01 | 1.54  | 6.17E-02 | 1.37  | 8.53E-02 |
| OR51B4   | -0.50 | 6.90E-01 | -1.02 | 8.46E-01 | -1.25 | 8.95E-01 |
| ZDHHC23  | -0.50 | 6.90E-01 | -0.55 | 7.08E-01 | -1.46 | 9.28E-01 |
| LTBP2    | -0.50 | 6.90E-01 | 0.15  | 4.42E-01 | -0.30 | 6.17E-01 |
| GPR176   | -0.50 | 6.90E-01 | -0.62 | 7.32E-01 | 0.24  | 4.05E-01 |
| NAT6     | -0.50 | 6.90E-01 | 0.64  | 2.60E-01 | 0.08  | 4.67E-01 |
| HRG      | -0.50 | 6.90E-01 | -0.10 | 5.41E-01 | -1.68 | 9.53E-01 |
| PF4      | -0.50 | 6.90E-01 | -0.10 | 5.38E-01 | 0.33  | 3.71E-01 |
| FAM160A1 | -0.50 | 6.90E-01 | -0.80 | 7.87E-01 | 0.72  | 2.37E-01 |
| GLYR1    | -0.50 | 6.90E-01 | 0.89  | 1.87E-01 | 0.59  | 2.78E-01 |
| FSTL1    | -0.50 | 6.91E-01 | 0.02  | 4.92E-01 | -0.48 | 6.85E-01 |

|          |       |          |       |          |       |          |
|----------|-------|----------|-------|----------|-------|----------|
| NRIP1    | -0.50 | 6.91E-01 | -0.93 | 8.24E-01 | -1.00 | 8.43E-01 |
| FA2H     | -0.50 | 6.91E-01 | 0.26  | 3.98E-01 | 0.09  | 4.63E-01 |
| G6PC     | -0.50 | 6.91E-01 | -1.20 | 8.85E-01 | -0.20 | 5.81E-01 |
| ANKRD31  | -0.50 | 6.91E-01 | 0.18  | 4.29E-01 | -0.57 | 7.16E-01 |
| ETF1     | -0.50 | 6.91E-01 | -0.93 | 8.25E-01 | 0.08  | 4.68E-01 |
| PAX9     | -0.50 | 6.91E-01 | -0.67 | 7.48E-01 | -0.27 | 6.07E-01 |
| SYVN1    | -0.50 | 6.91E-01 | 1.51  | 6.61E-02 | 0.88  | 1.89E-01 |
| ARL6     | -0.50 | 6.91E-01 | -0.45 | 6.74E-01 | -0.89 | 8.14E-01 |
| ZNF195   | -0.50 | 6.91E-01 | -0.55 | 7.07E-01 | 1.61  | 5.40E-02 |
| FUT2     | -0.50 | 6.91E-01 | -0.05 | 5.19E-01 | -1.19 | 8.84E-01 |
| YARS2    | -0.50 | 6.91E-01 | -0.65 | 7.43E-01 | -0.62 | 7.33E-01 |
| ACY3     | -0.50 | 6.91E-01 | -0.35 | 6.38E-01 | 0.19  | 4.26E-01 |
| RRBP1    | -0.50 | 6.92E-01 | -0.63 | 7.34E-01 | 0.17  | 4.33E-01 |
| SDK1     | -0.50 | 6.92E-01 | -1.54 | 9.38E-01 | 0.03  | 4.87E-01 |
| IFIT2    | -0.50 | 6.92E-01 | -0.56 | 7.13E-01 | 0.42  | 3.35E-01 |
| UBE2L3   | -0.50 | 6.92E-01 | 1.00  | 1.58E-01 | 0.55  | 2.93E-01 |
| LYRM7    | -0.50 | 6.92E-01 | -0.20 | 5.79E-01 | -0.21 | 5.83E-01 |
| TIMM13   | -0.50 | 6.92E-01 | 0.31  | 3.78E-01 | -1.57 | 9.42E-01 |
| GLRB     | -0.50 | 6.92E-01 | -0.56 | 7.11E-01 | -0.36 | 6.41E-01 |
| ARPP19   | -0.50 | 6.92E-01 | -1.70 | 9.56E-01 | 0.08  | 4.69E-01 |
| ID1      | -0.50 | 6.92E-01 | -0.02 | 5.08E-01 | -0.09 | 5.36E-01 |
| CLCN7    | -0.50 | 6.92E-01 | 0.17  | 4.33E-01 | -1.49 | 9.31E-01 |
| ARL5B    | -0.50 | 6.92E-01 | -0.71 | 7.60E-01 | -1.06 | 8.55E-01 |
| HAP1     | -0.50 | 6.92E-01 | 0.59  | 2.78E-01 | 0.22  | 4.13E-01 |
| OR13C9   | -0.50 | 6.92E-01 | -0.66 | 7.47E-01 | 0.72  | 2.37E-01 |
| SATB1    | -0.50 | 6.93E-01 | -0.55 | 7.10E-01 | -0.46 | 6.77E-01 |
| C11orf30 | -0.50 | 6.93E-01 | 0.58  | 2.80E-01 | 0.02  | 4.92E-01 |
| CLEC19A  | -0.50 | 6.93E-01 | -0.61 | 7.28E-01 | -0.17 | 5.66E-01 |
| TLK1     | -0.50 | 6.93E-01 | -1.59 | 9.44E-01 | 0.60  | 2.73E-01 |
| EXOSC9   | -0.50 | 6.93E-01 | -1.15 | 8.76E-01 | 0.95  | 1.72E-01 |
| SPHKAP   | -0.50 | 6.93E-01 | -0.12 | 5.47E-01 | -1.14 | 8.72E-01 |

|           |       |          |       |          |       |          |
|-----------|-------|----------|-------|----------|-------|----------|
| UBA2      | -0.50 | 6.93E-01 | 0.92  | 1.78E-01 | -0.90 | 8.17E-01 |
| CTNNA3    | -0.50 | 6.93E-01 | 0.75  | 2.27E-01 | 0.87  | 1.93E-01 |
| FABP1     | -0.50 | 6.93E-01 | 0.03  | 4.88E-01 | 1.31  | 9.50E-02 |
| PRDM1     | -0.50 | 6.93E-01 | 0.24  | 4.07E-01 | -0.19 | 5.76E-01 |
| RBM26     | -0.50 | 6.93E-01 | -0.25 | 6.01E-01 | -0.53 | 7.01E-01 |
| GDPD3     | -0.50 | 6.93E-01 | -0.90 | 8.17E-01 | 0.36  | 3.60E-01 |
| CIB2      | -0.50 | 6.93E-01 | 0.45  | 3.27E-01 | -1.29 | 9.02E-01 |
| C14orf119 | -0.50 | 6.93E-01 | -1.21 | 8.87E-01 | 0.34  | 3.66E-01 |
| AGO3      | -0.50 | 6.93E-01 | 0.10  | 4.62E-01 | 0.05  | 4.79E-01 |
| MAP2K7    | -0.51 | 6.93E-01 | -1.50 | 9.33E-01 | 1.89  | 2.93E-02 |
| SLC35D3   | -0.51 | 6.93E-01 | 0.13  | 4.50E-01 | -0.25 | 5.98E-01 |
| TLR9      | -0.51 | 6.93E-01 | -0.45 | 6.73E-01 | -0.20 | 5.81E-01 |
| HAX1      | -0.51 | 6.93E-01 | -0.13 | 5.50E-01 | -1.47 | 9.29E-01 |
| ZC3HC1    | -0.51 | 6.93E-01 | 0.72  | 2.34E-01 | -1.08 | 8.61E-01 |
| PANK2     | -0.51 | 6.93E-01 | -0.46 | 6.76E-01 | -1.30 | 9.03E-01 |
| C6orf223  | -0.51 | 6.94E-01 | -0.78 | 7.83E-01 | 0.46  | 3.22E-01 |
| C19orf81  | -0.51 | 6.94E-01 | 0.34  | 3.68E-01 | -1.16 | 8.76E-01 |
| C5AR1     | -0.51 | 6.94E-01 | 0.37  | 3.57E-01 | -0.57 | 7.17E-01 |
| KIAA0226  | -0.51 | 6.94E-01 | -0.55 | 7.10E-01 | 0.19  | 4.25E-01 |
| MOB3C     | -0.51 | 6.94E-01 | -0.39 | 6.53E-01 | 1.43  | 7.68E-02 |
| C16orf62  | -0.51 | 6.94E-01 | -0.46 | 6.78E-01 | -1.14 | 8.73E-01 |
| COMMD7    | -0.51 | 6.94E-01 | -0.27 | 6.06E-01 | -1.63 | 9.48E-01 |
| TERF2     | -0.51 | 6.94E-01 | -0.52 | 7.00E-01 | 1.90  | 2.88E-02 |
| SMIM12    | -0.51 | 6.94E-01 | -0.80 | 7.89E-01 | -1.34 | 9.10E-01 |
| B3GALT5   | -0.51 | 6.94E-01 | 0.53  | 2.99E-01 | 0.04  | 4.86E-01 |
| CPXM2     | -0.51 | 6.94E-01 | -1.14 | 8.73E-01 | 0.33  | 3.69E-01 |
| EMC1      | -0.51 | 6.94E-01 | -0.24 | 5.96E-01 | -1.50 | 9.33E-01 |
| NKAIN4    | -0.51 | 6.94E-01 | 0.44  | 3.29E-01 | -0.47 | 6.79E-01 |
| VPRBP     | -0.51 | 6.94E-01 | -0.57 | 7.17E-01 | -0.32 | 6.26E-01 |
| C10orf35  | -0.51 | 6.94E-01 | -1.05 | 8.54E-01 | -0.17 | 5.67E-01 |
| NOP58     | -0.51 | 6.94E-01 | -0.36 | 6.40E-01 | -1.42 | 9.22E-01 |

|          |       |          |       |          |       |          |
|----------|-------|----------|-------|----------|-------|----------|
| CRIM1    | -0.51 | 6.94E-01 | -0.13 | 5.51E-01 | -0.33 | 6.29E-01 |
| GMNN     | -0.51 | 6.94E-01 | -1.16 | 8.78E-01 | -0.93 | 8.25E-01 |
| SLC5A6   | -0.51 | 6.94E-01 | -2.14 | 9.84E-01 | 0.26  | 3.99E-01 |
| MANSC4   | -0.51 | 6.94E-01 | 0.15  | 4.42E-01 | -1.09 | 8.63E-01 |
| CLLU1    | -0.51 | 6.94E-01 | -0.17 | 5.68E-01 | -0.06 | 5.23E-01 |
| ROMO1    | -0.51 | 6.94E-01 | -1.12 | 8.68E-01 | -0.75 | 7.72E-01 |
| VPS13A   | -0.51 | 6.95E-01 | 1.07  | 1.43E-01 | -1.08 | 8.61E-01 |
| ZER1     | -0.51 | 6.95E-01 | -0.54 | 7.07E-01 | -0.49 | 6.88E-01 |
| DNAJC13  | -0.51 | 6.95E-01 | 0.06  | 4.75E-01 | -0.79 | 7.84E-01 |
| CD82     | -0.51 | 6.95E-01 | 0.35  | 3.64E-01 | -1.69 | 9.54E-01 |
| ANKRD46  | -0.51 | 6.95E-01 | -0.31 | 6.24E-01 | 0.26  | 3.98E-01 |
| AKTIP    | -0.51 | 6.95E-01 | 0.85  | 1.97E-01 | 0.19  | 4.26E-01 |
| GALNT14  | -0.51 | 6.95E-01 | -0.69 | 7.53E-01 | 0.35  | 3.65E-01 |
| ATP5G3   | -0.51 | 6.95E-01 | -0.48 | 6.83E-01 | -1.57 | 9.42E-01 |
| APOA4    | -0.51 | 6.95E-01 | -1.52 | 9.36E-01 | -0.01 | 5.03E-01 |
| LGR6     | -0.51 | 6.95E-01 | -0.51 | 6.94E-01 | 0.79  | 2.15E-01 |
| LRP5     | -0.51 | 6.95E-01 | -0.64 | 7.40E-01 | -0.72 | 7.64E-01 |
| PHYKPL   | -0.51 | 6.95E-01 | -0.37 | 6.46E-01 | -0.88 | 8.10E-01 |
| CCPG1    | -0.51 | 6.95E-01 | -0.13 | 5.53E-01 | -1.07 | 8.58E-01 |
| PCMTD1   | -0.51 | 6.95E-01 | 0.43  | 3.33E-01 | 0.19  | 4.25E-01 |
| PTPRN2   | -0.51 | 6.95E-01 | 0.66  | 2.54E-01 | 0.72  | 2.35E-01 |
| ZSCAN5A  | -0.51 | 6.95E-01 | -0.76 | 7.77E-01 | -1.08 | 8.60E-01 |
| CLEC9A   | -0.51 | 6.95E-01 | 0.97  | 1.66E-01 | 2.28  | 1.13E-02 |
| MTMR4    | -0.51 | 6.95E-01 | 0.54  | 2.93E-01 | -0.39 | 6.50E-01 |
| PRMT7    | -0.51 | 6.95E-01 | -0.58 | 7.18E-01 | 0.71  | 2.38E-01 |
| STXBP2   | -0.51 | 6.96E-01 | -1.25 | 8.94E-01 | 0.00  | 5.01E-01 |
| SUSD1    | -0.51 | 6.96E-01 | 0.37  | 3.57E-01 | 1.42  | 7.81E-02 |
| ADC      | -0.51 | 6.96E-01 | 0.04  | 4.83E-01 | 1.00  | 1.58E-01 |
| C10orf10 | -0.51 | 6.96E-01 | 0.53  | 2.97E-01 | -0.73 | 7.68E-01 |
| KPNA5    | -0.51 | 6.96E-01 | 0.02  | 4.93E-01 | -0.79 | 7.84E-01 |
| TIGD5    | -0.51 | 6.96E-01 | 0.52  | 3.02E-01 | 0.48  | 3.15E-01 |

|           |       |          |       |          |       |          |
|-----------|-------|----------|-------|----------|-------|----------|
| LAMTOR2   | -0.51 | 6.96E-01 | 0.71  | 2.40E-01 | -0.36 | 6.41E-01 |
| TGM3      | -0.51 | 6.96E-01 | -1.07 | 8.58E-01 | 0.03  | 4.88E-01 |
| CNNM1     | -0.51 | 6.96E-01 | -0.14 | 5.54E-01 | 0.73  | 2.34E-01 |
| SGSM2     | -0.51 | 6.96E-01 | -0.32 | 6.24E-01 | -0.23 | 5.92E-01 |
| UBL5      | -0.51 | 6.96E-01 | -1.03 | 8.48E-01 | 0.16  | 4.38E-01 |
| KRTAP4-7  | -0.51 | 6.96E-01 | -1.20 | 8.84E-01 | -0.49 | 6.86E-01 |
| BUD13     | -0.51 | 6.96E-01 | -1.64 | 9.49E-01 | 0.14  | 4.44E-01 |
| CTSV      | -0.51 | 6.96E-01 | -1.20 | 8.85E-01 | -0.26 | 6.03E-01 |
| PAQR5     | -0.51 | 6.96E-01 | 0.37  | 3.54E-01 | -0.68 | 7.53E-01 |
| CARD8     | -0.51 | 6.96E-01 | -0.89 | 8.13E-01 | -0.88 | 8.12E-01 |
| SKA3      | -0.51 | 6.97E-01 | 0.06  | 4.75E-01 | -0.05 | 5.19E-01 |
| MFSD6     | -0.51 | 6.97E-01 | 0.67  | 2.51E-01 | 0.15  | 4.41E-01 |
| BSDC1     | -0.51 | 6.97E-01 | 1.37  | 8.49E-02 | 0.33  | 3.69E-01 |
| HSD17B3   | -0.51 | 6.97E-01 | 0.36  | 3.59E-01 | -2.38 | 9.91E-01 |
| FAM111A   | -0.51 | 6.97E-01 | -1.03 | 8.49E-01 | -0.85 | 8.01E-01 |
| TTC1      | -0.51 | 6.97E-01 | 0.81  | 2.10E-01 | -0.42 | 6.62E-01 |
| PRELP     | -0.52 | 6.97E-01 | -0.03 | 5.13E-01 | -0.14 | 5.55E-01 |
| RGPD8     | -0.52 | 6.97E-01 | -1.88 | 9.70E-01 | 0.61  | 2.72E-01 |
| AS3MT     | -0.52 | 6.97E-01 | -0.19 | 5.76E-01 | -0.70 | 7.60E-01 |
| DTL       | -0.52 | 6.97E-01 | -0.94 | 8.27E-01 | 0.05  | 4.80E-01 |
| IL17RE    | -0.52 | 6.97E-01 | -1.28 | 9.00E-01 | 0.04  | 4.84E-01 |
| ZFAT      | -0.52 | 6.97E-01 | 0.13  | 4.47E-01 | -1.32 | 9.07E-01 |
| UBE2O     | -0.52 | 6.97E-01 | -0.71 | 7.61E-01 | -0.59 | 7.23E-01 |
| ZNHIT1    | -0.52 | 6.97E-01 | 0.64  | 2.61E-01 | -0.37 | 6.44E-01 |
| CYP17A1   | -0.52 | 6.97E-01 | 0.38  | 3.51E-01 | -0.68 | 7.52E-01 |
| KIAA1024L | -0.52 | 6.97E-01 | -2.23 | 9.87E-01 | 0.83  | 2.04E-01 |
| MEF2BNB   | -0.52 | 6.97E-01 | -0.30 | 6.18E-01 | -0.56 | 7.14E-01 |
| RUNDC3B   | -0.52 | 6.97E-01 | 0.11  | 4.56E-01 | -1.32 | 9.06E-01 |
| LILRB2    | -0.52 | 6.97E-01 | -0.30 | 6.18E-01 | -0.24 | 5.95E-01 |
| FAM227A   | -0.52 | 6.97E-01 | 0.25  | 4.02E-01 | -0.40 | 6.56E-01 |
| MYO15B    | -0.52 | 6.97E-01 | 0.00  | 4.99E-01 | 1.24  | 1.07E-01 |



|             |       |          |       |          |       |          |
|-------------|-------|----------|-------|----------|-------|----------|
| ABCC2       | -0.52 | 6.97E-01 | -1.30 | 9.02E-01 | -0.20 | 5.79E-01 |
| ZNF525      | -0.52 | 6.97E-01 | -1.15 | 8.75E-01 | -0.11 | 5.43E-01 |
| VTN         | -0.52 | 6.98E-01 | -0.48 | 6.86E-01 | -1.24 | 8.93E-01 |
| DHX15       | -0.52 | 6.98E-01 | -0.93 | 8.23E-01 | -1.33 | 9.08E-01 |
| TPGS2       | -0.52 | 6.98E-01 | -0.62 | 7.33E-01 | 0.87  | 1.92E-01 |
| ORMDL2      | -0.52 | 6.98E-01 | -0.46 | 6.77E-01 | -1.34 | 9.11E-01 |
| BTBD10      | -0.52 | 6.98E-01 | -0.14 | 5.55E-01 | 1.84  | 3.31E-02 |
| RCCD1       | -0.52 | 6.98E-01 | 0.64  | 2.60E-01 | -0.70 | 7.57E-01 |
| GBA2        | -0.52 | 6.98E-01 | -1.11 | 8.66E-01 | -0.83 | 7.96E-01 |
| USPL1       | -0.52 | 6.98E-01 | -0.53 | 7.02E-01 | -0.09 | 5.35E-01 |
| SLCO1B3     | -0.52 | 6.98E-01 | -0.26 | 6.04E-01 | -1.08 | 8.59E-01 |
| SLC4A4      | -0.52 | 6.98E-01 | -0.74 | 7.71E-01 | 0.76  | 2.24E-01 |
| CRMP1       | -0.52 | 6.98E-01 | -0.21 | 5.83E-01 | -0.21 | 5.84E-01 |
| PADI2       | -0.52 | 6.98E-01 | -0.75 | 7.74E-01 | -0.73 | 7.66E-01 |
| ARHGEF4     | -0.52 | 6.98E-01 | 1.55  | 6.04E-02 | 0.15  | 4.39E-01 |
| VIMP        | -0.52 | 6.98E-01 | 0.84  | 2.00E-01 | -2.28 | 9.89E-01 |
| ACACA       | -0.52 | 6.98E-01 | 0.57  | 2.85E-01 | 1.40  | 8.03E-02 |
| SELM        | -0.52 | 6.98E-01 | -0.03 | 5.11E-01 | -1.54 | 9.38E-01 |
| LUM         | -0.52 | 6.98E-01 | -0.69 | 7.55E-01 | -1.45 | 9.27E-01 |
| NUTM1       | -0.52 | 6.98E-01 | -0.78 | 7.83E-01 | -0.87 | 8.08E-01 |
| KB-1980E6.3 | -0.52 | 6.98E-01 | 0.26  | 3.96E-01 | -1.70 | 9.55E-01 |
| EIF4EBP2    | -0.52 | 6.98E-01 | -0.46 | 6.78E-01 | -0.03 | 5.13E-01 |
| FRMD5       | -0.52 | 6.98E-01 | -1.27 | 8.98E-01 | -0.68 | 7.51E-01 |
| PPP1R27     | -0.52 | 6.98E-01 | -0.23 | 5.92E-01 | -1.84 | 9.67E-01 |
| CLEC12A     | -0.52 | 6.99E-01 | 0.31  | 3.78E-01 | -1.41 | 9.20E-01 |
| SMARCE1     | -0.52 | 6.99E-01 | -1.02 | 8.46E-01 | 0.22  | 4.13E-01 |
| NAPSA       | -0.52 | 6.99E-01 | -0.36 | 6.41E-01 | -1.35 | 9.12E-01 |
| KCNC1       | -0.52 | 6.99E-01 | -0.04 | 5.15E-01 | -0.61 | 7.29E-01 |
| C14orf39    | -0.52 | 6.99E-01 | 0.16  | 4.35E-01 | -0.62 | 7.31E-01 |
| C12orf61    | -0.52 | 6.99E-01 | 0.55  | 2.91E-01 | -0.92 | 8.21E-01 |
| GATM        | -0.52 | 6.99E-01 | -0.23 | 5.92E-01 | -2.02 | 9.79E-01 |

|            |       |          |       |          |       |          |
|------------|-------|----------|-------|----------|-------|----------|
| SLCO1B7    | -0.52 | 6.99E-01 | -0.31 | 6.20E-01 | -1.06 | 8.56E-01 |
| GNAT3      | -0.52 | 6.99E-01 | -0.70 | 7.57E-01 | -0.40 | 6.54E-01 |
| LPHN2      | -0.52 | 6.99E-01 | -0.61 | 7.29E-01 | 1.28  | 1.01E-01 |
| LDLRAD4    | -0.52 | 6.99E-01 | -1.91 | 9.72E-01 | 0.60  | 2.76E-01 |
| KAZN       | -0.52 | 6.99E-01 | -0.72 | 7.66E-01 | -2.64 | 9.96E-01 |
| GJB5       | -0.52 | 6.99E-01 | -0.37 | 6.44E-01 | 0.25  | 4.01E-01 |
| PSAPL1     | -0.52 | 6.99E-01 | -0.24 | 5.95E-01 | 1.56  | 5.90E-02 |
| NTRK1      | -0.52 | 6.99E-01 | 0.00  | 4.99E-01 | 0.36  | 3.58E-01 |
| GSTM1      | -0.52 | 6.99E-01 | -1.19 | 8.83E-01 | 0.75  | 2.28E-01 |
| DNM1L      | -0.52 | 7.00E-01 | -0.61 | 7.31E-01 | -1.00 | 8.40E-01 |
| NDUFAF1    | -0.52 | 7.00E-01 | -0.48 | 6.83E-01 | -1.66 | 9.52E-01 |
| ARL8A      | -0.52 | 7.00E-01 | -0.16 | 5.64E-01 | -0.40 | 6.54E-01 |
| NCR3LG1    | -0.52 | 7.00E-01 | -0.20 | 5.78E-01 | -1.18 | 8.81E-01 |
| TMEM97     | -0.52 | 7.00E-01 | -0.25 | 6.00E-01 | -1.17 | 8.80E-01 |
| GH1        | -0.52 | 7.00E-01 | -0.42 | 6.62E-01 | -1.69 | 9.54E-01 |
| HOXB13     | -0.52 | 7.00E-01 | -0.37 | 6.45E-01 | -1.49 | 9.32E-01 |
| PDCL       | -0.52 | 7.00E-01 | -0.32 | 6.25E-01 | -1.25 | 8.95E-01 |
| CNFN       | -0.52 | 7.00E-01 | -0.55 | 7.10E-01 | -1.10 | 8.64E-01 |
| RPUSD2     | -0.52 | 7.00E-01 | 0.17  | 4.33E-01 | -0.40 | 6.56E-01 |
| ST6GALNAC2 | -0.52 | 7.00E-01 | 0.03  | 4.89E-01 | -0.69 | 7.54E-01 |
| GLRA1      | -0.52 | 7.00E-01 | 1.27  | 1.02E-01 | 0.84  | 2.00E-01 |
| GTSF1      | -0.53 | 7.00E-01 | 0.89  | 1.87E-01 | 0.33  | 3.70E-01 |
| SLC9A3R2   | -0.53 | 7.00E-01 | -0.33 | 6.30E-01 | -0.09 | 5.35E-01 |
| SYT14      | -0.53 | 7.00E-01 | -1.26 | 8.97E-01 | 0.28  | 3.89E-01 |
| ELF3       | -0.53 | 7.00E-01 | -0.68 | 7.50E-01 | -0.35 | 6.37E-01 |
| PTPRN      | -0.53 | 7.01E-01 | -1.89 | 9.71E-01 | -0.59 | 7.22E-01 |
| MTIF3      | -0.53 | 7.01E-01 | 0.36  | 3.58E-01 | -1.16 | 8.77E-01 |
| ACOT7      | -0.53 | 7.01E-01 | 0.56  | 2.89E-01 | -0.24 | 5.97E-01 |
| PHF5A      | -0.53 | 7.01E-01 | -0.59 | 7.24E-01 | -0.03 | 5.12E-01 |
| TTC27      | -0.53 | 7.01E-01 | -0.08 | 5.31E-01 | -1.22 | 8.89E-01 |
| KAT7       | -0.53 | 7.01E-01 | -0.75 | 7.73E-01 | -0.45 | 6.74E-01 |

|           |       |          |       |          |       |          |
|-----------|-------|----------|-------|----------|-------|----------|
| ASB16     | -0.53 | 7.01E-01 | -0.36 | 6.42E-01 | -1.16 | 8.77E-01 |
| MAGOHB    | -0.53 | 7.01E-01 | -0.67 | 7.48E-01 | -1.11 | 8.65E-01 |
| PGBD2     | -0.53 | 7.01E-01 | -0.72 | 7.63E-01 | 0.44  | 3.30E-01 |
| SERPINA12 | -0.53 | 7.01E-01 | -0.44 | 6.69E-01 | -1.14 | 8.73E-01 |
| RBL1      | -0.53 | 7.01E-01 | 0.92  | 1.79E-01 | -0.85 | 8.02E-01 |
| FUBP1     | -0.53 | 7.01E-01 | -1.22 | 8.89E-01 | 1.31  | 9.47E-02 |
| KCTD12    | -0.53 | 7.01E-01 | -0.62 | 7.32E-01 | -0.84 | 8.00E-01 |
| ALDH1A3   | -0.53 | 7.02E-01 | 0.24  | 4.05E-01 | -1.27 | 8.98E-01 |
| NLRP11    | -0.53 | 7.02E-01 | -0.07 | 5.28E-01 | -0.10 | 5.38E-01 |
| HAPLN3    | -0.53 | 7.02E-01 | -0.02 | 5.09E-01 | -1.64 | 9.50E-01 |
| GATAD2B   | -0.53 | 7.02E-01 | -0.18 | 5.72E-01 | 1.50  | 6.63E-02 |
| TMX1      | -0.53 | 7.02E-01 | -0.88 | 8.12E-01 | -1.32 | 9.06E-01 |
| NXN       | -0.53 | 7.02E-01 | -0.29 | 6.16E-01 | -1.24 | 8.93E-01 |
| UBE2H     | -0.53 | 7.02E-01 | -0.84 | 7.99E-01 | -0.85 | 8.02E-01 |
| HGSNAT    | -0.53 | 7.02E-01 | -0.76 | 7.76E-01 | 0.32  | 3.76E-01 |
| CCL16     | -0.53 | 7.02E-01 | 2.02  | 2.17E-02 | 0.70  | 2.42E-01 |
| MIDN      | -0.53 | 7.02E-01 | 0.85  | 1.97E-01 | 0.35  | 3.64E-01 |
| TCIRG1    | -0.53 | 7.02E-01 | -0.57 | 7.16E-01 | -0.92 | 8.22E-01 |
| PITRM1    | -0.53 | 7.02E-01 | -0.93 | 8.25E-01 | 1.08  | 1.40E-01 |
| H2AFZ     | -0.53 | 7.02E-01 | 0.41  | 3.40E-01 | 1.69  | 4.59E-02 |
| ZNF563    | -0.53 | 7.02E-01 | -0.45 | 6.74E-01 | 0.79  | 2.16E-01 |
| ZBED5     | -0.53 | 7.02E-01 | -1.80 | 9.64E-01 | 0.63  | 2.64E-01 |
| ACKR4     | -0.53 | 7.02E-01 | 0.10  | 4.59E-01 | -0.91 | 8.18E-01 |
| QPCT      | -0.53 | 7.02E-01 | -0.28 | 6.11E-01 | 1.62  | 5.29E-02 |
| LST3      | -0.53 | 7.02E-01 | -0.31 | 6.23E-01 | -1.07 | 8.58E-01 |
| NSUN6     | -0.53 | 7.02E-01 | -0.54 | 7.04E-01 | -1.63 | 9.49E-01 |
| NR2C2     | -0.53 | 7.02E-01 | -1.07 | 8.58E-01 | -0.60 | 7.27E-01 |
| ARF4      | -0.53 | 7.02E-01 | -0.29 | 6.14E-01 | 0.27  | 3.94E-01 |
| STMND1    | -0.53 | 7.02E-01 | 0.09  | 4.63E-01 | -0.75 | 7.73E-01 |
| C2orf62   | -0.53 | 7.02E-01 | -0.82 | 7.93E-01 | -1.31 | 9.06E-01 |
| DEFB125   | -0.53 | 7.02E-01 | -1.65 | 9.51E-01 | -0.25 | 5.98E-01 |

|         |       |          |       |          |       |          |
|---------|-------|----------|-------|----------|-------|----------|
| TM4SF5  | -0.53 | 7.02E-01 | -2.49 | 9.94E-01 | 0.26  | 3.96E-01 |
| MCM3AP  | -0.53 | 7.03E-01 | -1.09 | 8.62E-01 | 0.85  | 1.99E-01 |
| H1FX    | -0.53 | 7.03E-01 | -1.05 | 8.54E-01 | 0.98  | 1.63E-01 |
| CDH16   | -0.53 | 7.03E-01 | -0.25 | 5.97E-01 | -0.14 | 5.56E-01 |
| MMAB    | -0.53 | 7.03E-01 | 0.01  | 4.95E-01 | -1.79 | 9.63E-01 |
| OSBPL2  | -0.53 | 7.03E-01 | 1.25  | 1.06E-01 | -0.24 | 5.94E-01 |
| PCDHB4  | -0.53 | 7.03E-01 | -0.90 | 8.15E-01 | -0.38 | 6.49E-01 |
| ANKRD66 | -0.53 | 7.03E-01 | 0.32  | 3.76E-01 | 0.08  | 4.69E-01 |
| DDR2    | -0.53 | 7.03E-01 | -1.56 | 9.40E-01 | 0.49  | 3.13E-01 |
| CLASP1  | -0.53 | 7.03E-01 | 0.88  | 1.88E-01 | 0.88  | 1.88E-01 |
| TXN     | -0.53 | 7.03E-01 | -0.38 | 6.50E-01 | -0.76 | 7.78E-01 |
| KCNJ12  | -0.53 | 7.03E-01 | -1.44 | 9.25E-01 | 0.29  | 3.85E-01 |
| FLRT3   | -0.53 | 7.03E-01 | 0.34  | 3.65E-01 | -0.50 | 6.92E-01 |
| AREL1   | -0.53 | 7.03E-01 | 0.07  | 4.71E-01 | 1.06  | 1.45E-01 |
| OR1J2   | -0.53 | 7.03E-01 | -0.30 | 6.17E-01 | 0.96  | 1.69E-01 |
| RFC1    | -0.53 | 7.03E-01 | -0.28 | 6.12E-01 | -1.36 | 9.13E-01 |
| DEPDC1  | -0.53 | 7.03E-01 | 2.07  | 1.90E-02 | 1.15  | 1.25E-01 |
| TCN2    | -0.53 | 7.03E-01 | -0.59 | 7.22E-01 | -0.14 | 5.55E-01 |
| ELL2    | -0.53 | 7.04E-01 | 0.30  | 3.82E-01 | -0.35 | 6.36E-01 |
| FAM24B  | -0.53 | 7.04E-01 | 0.93  | 1.77E-01 | -0.35 | 6.38E-01 |
| RBBP8NL | -0.54 | 7.04E-01 | -0.79 | 7.85E-01 | 0.19  | 4.24E-01 |
| B3GALTL | -0.54 | 7.04E-01 | 0.58  | 2.82E-01 | -1.11 | 8.67E-01 |
| MEIOB   | -0.54 | 7.04E-01 | -1.03 | 8.49E-01 | -0.23 | 5.91E-01 |
| GRHL1   | -0.54 | 7.04E-01 | 1.02  | 1.54E-01 | -1.31 | 9.05E-01 |
| PNPLA2  | -0.54 | 7.04E-01 | -0.05 | 5.19E-01 | -0.78 | 7.83E-01 |
| XCL2    | -0.54 | 7.04E-01 | 0.42  | 3.36E-01 | 0.83  | 2.03E-01 |
| EXOC3   | -0.54 | 7.04E-01 | 0.30  | 3.82E-01 | -1.62 | 9.47E-01 |
| GSR     | -0.54 | 7.04E-01 | -1.34 | 9.10E-01 | -0.11 | 5.44E-01 |
| SLC4A10 | -0.54 | 7.04E-01 | -0.63 | 7.36E-01 | -0.85 | 8.03E-01 |
| PRMT8   | -0.54 | 7.04E-01 | -1.01 | 8.44E-01 | -0.50 | 6.93E-01 |
| NOBOX   | -0.54 | 7.04E-01 | -0.42 | 6.61E-01 | -1.29 | 9.02E-01 |

|               |       |          |       |          |       |          |
|---------------|-------|----------|-------|----------|-------|----------|
| FUT1          | -0.54 | 7.04E-01 | 0.06  | 4.76E-01 | -0.72 | 7.64E-01 |
| OIP5          | -0.54 | 7.04E-01 | -0.24 | 5.95E-01 | -1.30 | 9.03E-01 |
| ZSCAN25       | -0.54 | 7.04E-01 | -0.62 | 7.32E-01 | -0.31 | 6.21E-01 |
| LIMK2         | -0.54 | 7.04E-01 | -0.47 | 6.82E-01 | -0.67 | 7.47E-01 |
| NEO1          | -0.54 | 7.04E-01 | -0.65 | 7.41E-01 | -1.14 | 8.72E-01 |
| ERICH1        | -0.54 | 7.05E-01 | -0.35 | 6.36E-01 | 1.17  | 1.20E-01 |
| FAM166B       | -0.54 | 7.05E-01 | -0.11 | 5.44E-01 | -1.98 | 9.76E-01 |
| C10orf32-ASMT | -0.54 | 7.05E-01 | -0.30 | 6.18E-01 | -0.85 | 8.02E-01 |
| S100A2        | -0.54 | 7.05E-01 | 0.35  | 3.62E-01 | 1.00  | 1.58E-01 |
| PTRHD1        | -0.54 | 7.05E-01 | 1.88  | 3.02E-02 | 0.39  | 3.50E-01 |
| SLC32A1       | -0.54 | 7.05E-01 | 0.99  | 1.61E-01 | 0.47  | 3.19E-01 |
| RNASE11       | -0.54 | 7.05E-01 | 0.79  | 2.14E-01 | -0.79 | 7.85E-01 |
| RNASE11       | -0.54 | 7.05E-01 | 0.79  | 2.14E-01 | -0.79 | 7.85E-01 |
| RBPJ          | -0.54 | 7.05E-01 | -0.87 | 8.07E-01 | 0.02  | 4.91E-01 |
| R3HDM1        | -0.54 | 7.05E-01 | -0.73 | 7.69E-01 | -0.51 | 6.96E-01 |
| ITM2C         | -0.54 | 7.05E-01 | -0.09 | 5.37E-01 | -0.57 | 7.14E-01 |
| DEXI          | -0.54 | 7.05E-01 | -0.94 | 8.26E-01 | 0.18  | 4.28E-01 |
| RCAN1         | -0.54 | 7.05E-01 | 0.00  | 5.01E-01 | -0.80 | 7.88E-01 |
| SLC22A14      | -0.54 | 7.05E-01 | -0.59 | 7.24E-01 | -0.04 | 5.15E-01 |
| PYROXD2       | -0.54 | 7.05E-01 | -0.81 | 7.91E-01 | -0.87 | 8.07E-01 |
| KCNG3         | -0.54 | 7.05E-01 | 0.86  | 1.94E-01 | -0.45 | 6.75E-01 |
| KLHL36        | -0.54 | 7.05E-01 | 0.14  | 4.42E-01 | 0.65  | 2.56E-01 |
| KIF19         | -0.54 | 7.05E-01 | -0.32 | 6.27E-01 | -1.37 | 9.14E-01 |
| RPAP2         | -0.54 | 7.05E-01 | -0.33 | 6.31E-01 | -1.01 | 8.45E-01 |
| TMEM130       | -0.54 | 7.05E-01 | -0.48 | 6.85E-01 | -0.77 | 7.80E-01 |
| HIP1          | -0.54 | 7.05E-01 | -1.95 | 9.74E-01 | 1.57  | 5.87E-02 |
| PAIP2B        | -0.54 | 7.05E-01 | -1.30 | 9.03E-01 | 0.44  | 3.31E-01 |
| MYH7          | -0.54 | 7.05E-01 | 0.54  | 2.93E-01 | -0.01 | 5.03E-01 |
| ORAOV1        | -0.54 | 7.06E-01 | -1.57 | 9.42E-01 | -0.33 | 6.30E-01 |
| TLCD1         | -0.54 | 7.06E-01 | -0.79 | 7.86E-01 | -0.22 | 5.88E-01 |
| SLC22A18      | -0.54 | 7.06E-01 | -0.57 | 7.17E-01 | -1.31 | 9.04E-01 |

|          |       |          |       |          |       |          |
|----------|-------|----------|-------|----------|-------|----------|
| BRIP1    | -0.54 | 7.06E-01 | 0.47  | 3.18E-01 | -0.06 | 5.24E-01 |
| UGT1A5   | -0.54 | 7.06E-01 | -0.17 | 5.69E-01 | -0.12 | 5.50E-01 |
| CEP72    | -0.54 | 7.06E-01 | -0.14 | 5.54E-01 | -1.05 | 8.54E-01 |
| CCDC104  | -0.54 | 7.06E-01 | 0.78  | 2.18E-01 | -0.67 | 7.47E-01 |
| ALDH7A1  | -0.54 | 7.06E-01 | 0.15  | 4.42E-01 | -0.46 | 6.76E-01 |
| OR13C5   | -0.54 | 7.06E-01 | -0.83 | 7.97E-01 | 0.75  | 2.27E-01 |
| PICK1    | -0.54 | 7.06E-01 | -0.46 | 6.78E-01 | 0.26  | 3.99E-01 |
| GLTSCR1  | -0.54 | 7.06E-01 | -0.07 | 5.26E-01 | -0.19 | 5.77E-01 |
| B4GALNT1 | -0.54 | 7.06E-01 | -1.22 | 8.88E-01 | -0.93 | 8.23E-01 |
| NDE1     | -0.54 | 7.07E-01 | 1.11  | 1.34E-01 | 0.96  | 1.69E-01 |
| TNIP3    | -0.54 | 7.07E-01 | 0.05  | 4.80E-01 | -0.31 | 6.21E-01 |
| CDC37L1  | -0.54 | 7.07E-01 | -0.66 | 7.46E-01 | 0.75  | 2.27E-01 |
| SLC46A3  | -0.54 | 7.07E-01 | -1.37 | 9.15E-01 | 0.19  | 4.26E-01 |
| AKNAD1   | -0.54 | 7.07E-01 | -0.25 | 5.99E-01 | -0.48 | 6.86E-01 |
| CCDC33   | -0.54 | 7.07E-01 | 0.18  | 4.28E-01 | -0.95 | 8.30E-01 |
| RBFOX2   | -0.54 | 7.07E-01 | -1.10 | 8.65E-01 | -0.17 | 5.66E-01 |
| MMEL1    | -0.54 | 7.07E-01 | -0.89 | 8.13E-01 | 0.43  | 3.35E-01 |
| ATP6V0E1 | -0.54 | 7.07E-01 | -1.17 | 8.78E-01 | 0.89  | 1.85E-01 |
| ARL4C    | -0.54 | 7.07E-01 | -0.04 | 5.14E-01 | 0.65  | 2.59E-01 |
| VN1R2    | -0.54 | 7.07E-01 | -0.33 | 6.30E-01 | -0.66 | 7.44E-01 |
| HOXA9    | -0.54 | 7.07E-01 | 0.62  | 2.69E-01 | 0.92  | 1.79E-01 |
| TRIM49D1 | -0.54 | 7.07E-01 | -2.53 | 9.94E-01 | -0.22 | 5.86E-01 |
| FBXW9    | -0.54 | 7.07E-01 | -0.75 | 7.74E-01 | 0.25  | 4.00E-01 |
| FAM71A   | -0.54 | 7.07E-01 | -1.15 | 8.75E-01 | -0.29 | 6.15E-01 |
| RAMP1    | -0.54 | 7.07E-01 | 0.02  | 4.92E-01 | -0.53 | 7.03E-01 |
| ALDH1L1  | -0.54 | 7.07E-01 | -0.12 | 5.48E-01 | 1.20  | 1.15E-01 |
| SCAP     | -0.54 | 7.07E-01 | -0.12 | 5.48E-01 | 0.44  | 3.30E-01 |
| TGFBR2   | -0.54 | 7.07E-01 | -0.04 | 5.17E-01 | -1.28 | 8.99E-01 |
| ROPN1L   | -0.54 | 7.07E-01 | -0.40 | 6.57E-01 | -0.14 | 5.55E-01 |
| CARD18   | -0.55 | 7.07E-01 | -0.46 | 6.78E-01 | 0.04  | 4.83E-01 |
| UGT3A2   | -0.55 | 7.07E-01 | -0.17 | 5.68E-01 | 0.67  | 2.52E-01 |

|         |       |          |       |          |       |          |
|---------|-------|----------|-------|----------|-------|----------|
| CSRP2   | -0.55 | 7.07E-01 | -0.56 | 7.11E-01 | 0.47  | 3.18E-01 |
| OASL    | -0.55 | 7.07E-01 | -1.11 | 8.66E-01 | 0.62  | 2.67E-01 |
| FAT1    | -0.55 | 7.07E-01 | 0.32  | 3.75E-01 | -1.93 | 9.73E-01 |
| EMP3    | -0.55 | 7.08E-01 | -0.13 | 5.51E-01 | -1.05 | 8.54E-01 |
| MPPE1   | -0.55 | 7.08E-01 | -0.04 | 5.14E-01 | -0.69 | 7.56E-01 |
| PRKAG2  | -0.55 | 7.08E-01 | -1.34 | 9.11E-01 | 0.18  | 4.28E-01 |
| CPVL    | -0.55 | 7.08E-01 | -1.11 | 8.66E-01 | 0.05  | 4.81E-01 |
| NINJ1   | -0.55 | 7.08E-01 | -2.89 | 9.98E-01 | 1.12  | 1.32E-01 |
| MRPL49  | -0.55 | 7.08E-01 | 1.24  | 1.07E-01 | -0.38 | 6.46E-01 |
| WDR92   | -0.55 | 7.08E-01 | 0.02  | 4.94E-01 | -0.18 | 5.71E-01 |
| TRPM5   | -0.55 | 7.08E-01 | -0.10 | 5.41E-01 | -0.76 | 7.78E-01 |
| SPPL2A  | -0.55 | 7.08E-01 | -0.42 | 6.62E-01 | -2.70 | 9.97E-01 |
| PRRT4   | -0.55 | 7.08E-01 | -0.81 | 7.91E-01 | 0.04  | 4.86E-01 |
| CCDC70  | -0.55 | 7.08E-01 | 0.19  | 4.26E-01 | 0.80  | 2.11E-01 |
| DDX42   | -0.55 | 7.09E-01 | -1.00 | 8.41E-01 | -0.95 | 8.29E-01 |
| MTHFD2  | -0.55 | 7.09E-01 | -1.16 | 8.77E-01 | -0.05 | 5.20E-01 |
| SRSF12  | -0.55 | 7.09E-01 | -0.06 | 5.26E-01 | 1.04  | 1.50E-01 |
| CCDC134 | -0.55 | 7.09E-01 | 0.69  | 2.45E-01 | 0.25  | 4.03E-01 |
| ENDOG   | -0.55 | 7.09E-01 | -0.53 | 7.02E-01 | 0.16  | 4.35E-01 |
| SAMD10  | -0.55 | 7.09E-01 | -1.66 | 9.52E-01 | 0.15  | 4.39E-01 |
| ZMAT4   | -0.55 | 7.09E-01 | -0.83 | 7.96E-01 | -0.72 | 7.66E-01 |
| CPNE9   | -0.55 | 7.09E-01 | -0.43 | 6.65E-01 | 0.71  | 2.38E-01 |
| CLRN1   | -0.55 | 7.09E-01 | -1.28 | 8.99E-01 | 0.67  | 2.52E-01 |
| LRRC20  | -0.55 | 7.09E-01 | -1.39 | 9.17E-01 | 0.24  | 4.04E-01 |
| PRR12   | -0.55 | 7.09E-01 | -1.53 | 9.37E-01 | 0.00  | 5.00E-01 |
| RNF146  | -0.55 | 7.09E-01 | -0.69 | 7.54E-01 | 0.10  | 4.62E-01 |
| OR52I1  | -0.55 | 7.09E-01 | 0.23  | 4.10E-01 | 1.93  | 2.71E-02 |
| RASEF   | -0.55 | 7.09E-01 | 0.21  | 4.17E-01 | 1.13  | 1.29E-01 |
| MT1B    | -0.55 | 7.10E-01 | -0.85 | 8.03E-01 | -0.25 | 5.99E-01 |
| ZNF550  | -0.55 | 7.10E-01 | -0.10 | 5.40E-01 | -2.32 | 9.90E-01 |
| ARSG    | -0.55 | 7.10E-01 | -1.73 | 9.58E-01 | 0.15  | 4.41E-01 |

|           |       |          |       |          |       |          |
|-----------|-------|----------|-------|----------|-------|----------|
| BUD31     | -0.55 | 7.10E-01 | -0.05 | 5.19E-01 | -1.20 | 8.85E-01 |
| C19orf66  | -0.55 | 7.10E-01 | 0.28  | 3.91E-01 | -0.77 | 7.79E-01 |
| RNF215    | -0.55 | 7.10E-01 | 0.15  | 4.40E-01 | -1.41 | 9.21E-01 |
| IL18      | -0.55 | 7.10E-01 | -0.63 | 7.37E-01 | -0.16 | 5.64E-01 |
| C21orf140 | -0.55 | 7.10E-01 | -0.49 | 6.86E-01 | -1.53 | 9.37E-01 |
| SLC6A16   | -0.55 | 7.10E-01 | -0.37 | 6.44E-01 | 0.77  | 2.21E-01 |
| TMEM223   | -0.55 | 7.10E-01 | -1.05 | 8.54E-01 | -0.67 | 7.49E-01 |
| AP5M1     | -0.55 | 7.10E-01 | -1.39 | 9.18E-01 | 0.78  | 2.19E-01 |
| MORN5     | -0.55 | 7.10E-01 | 0.01  | 4.95E-01 | -0.07 | 5.28E-01 |
| ONECUT1   | -0.55 | 7.10E-01 | -0.59 | 7.21E-01 | 0.63  | 2.66E-01 |
| ZCWPW1    | -0.55 | 7.10E-01 | -0.73 | 7.66E-01 | -0.78 | 7.83E-01 |
| TSEN54    | -0.55 | 7.10E-01 | -0.62 | 7.34E-01 | -0.55 | 7.08E-01 |
| GGCT      | -0.55 | 7.10E-01 | -1.27 | 8.98E-01 | 0.24  | 4.05E-01 |
| UBAP2L    | -0.55 | 7.11E-01 | -0.10 | 5.42E-01 | -2.32 | 9.90E-01 |
| SPATA22   | -0.56 | 7.11E-01 | 0.74  | 2.31E-01 | -0.07 | 5.30E-01 |
| PGP       | -0.56 | 7.11E-01 | 0.23  | 4.11E-01 | -0.74 | 7.72E-01 |
| BMP5      | -0.56 | 7.11E-01 | -0.20 | 5.78E-01 | -0.80 | 7.87E-01 |
| DENND1C   | -0.56 | 7.11E-01 | -1.33 | 9.08E-01 | -0.02 | 5.06E-01 |
| DEFB132   | -0.56 | 7.11E-01 | -0.59 | 7.21E-01 | -0.89 | 8.12E-01 |
| SLA2      | -0.56 | 7.11E-01 | -0.56 | 7.13E-01 | -1.16 | 8.77E-01 |
| CA5A      | -0.56 | 7.11E-01 | 0.25  | 4.03E-01 | 0.20  | 4.21E-01 |
| SPTBN4    | -0.56 | 7.11E-01 | 0.86  | 1.96E-01 | 0.81  | 2.08E-01 |
| COL9A2    | -0.56 | 7.11E-01 | -0.44 | 6.72E-01 | -0.32 | 6.27E-01 |
| HN1       | -0.56 | 7.11E-01 | 0.81  | 2.10E-01 | -0.88 | 8.11E-01 |
| UTP11L    | -0.56 | 7.11E-01 | 0.59  | 2.78E-01 | 0.26  | 3.96E-01 |
| SLAMF8    | -0.56 | 7.11E-01 | 0.19  | 4.25E-01 | -0.09 | 5.36E-01 |
| SELE      | -0.56 | 7.11E-01 | 0.80  | 2.12E-01 | 0.91  | 1.81E-01 |
| TNPO2     | -0.56 | 7.11E-01 | -1.05 | 8.53E-01 | 0.22  | 4.11E-01 |
| FAM83D    | -0.56 | 7.11E-01 | 0.92  | 1.80E-01 | 2.81  | 2.47E-03 |
| SERPINB1  | -0.56 | 7.11E-01 | -1.56 | 9.40E-01 | 0.75  | 2.27E-01 |
| XKR6      | -0.56 | 7.11E-01 | -0.68 | 7.53E-01 | 1.04  | 1.49E-01 |



|          |       |          |       |          |       |          |
|----------|-------|----------|-------|----------|-------|----------|
| CYP26B1  | -0.56 | 7.11E-01 | -0.82 | 7.94E-01 | -0.66 | 7.46E-01 |
| WWC1     | -0.56 | 7.11E-01 | -1.14 | 8.73E-01 | 0.08  | 4.67E-01 |
| OR4C12   | -0.56 | 7.11E-01 | -1.76 | 9.60E-01 | -0.17 | 5.67E-01 |
| PCDHB13  | -0.56 | 7.12E-01 | -0.92 | 8.20E-01 | -1.18 | 8.81E-01 |
| ARMC2    | -0.56 | 7.12E-01 | 0.13  | 4.49E-01 | -2.03 | 9.79E-01 |
| FOXRED2  | -0.56 | 7.12E-01 | -0.83 | 7.98E-01 | 0.29  | 3.87E-01 |
| PET100   | -0.56 | 7.12E-01 | -1.43 | 9.23E-01 | -0.05 | 5.21E-01 |
| SDHB     | -0.56 | 7.12E-01 | 0.22  | 4.13E-01 | -0.38 | 6.47E-01 |
| BRF1     | -0.56 | 7.12E-01 | -0.46 | 6.78E-01 | 0.23  | 4.08E-01 |
| TMEM123  | -0.56 | 7.12E-01 | 0.39  | 3.48E-01 | 1.60  | 5.46E-02 |
| KIAA0825 | -0.56 | 7.12E-01 | -1.85 | 9.68E-01 | 0.65  | 2.59E-01 |
| GIT2     | -0.56 | 7.12E-01 | -1.73 | 9.58E-01 | -0.30 | 6.20E-01 |
| F2RL1    | -0.56 | 7.12E-01 | 0.07  | 4.72E-01 | -0.79 | 7.85E-01 |
| RBM6     | -0.56 | 7.12E-01 | 1.39  | 8.26E-02 | 0.91  | 1.83E-01 |
| ATL3     | -0.56 | 7.12E-01 | -1.16 | 8.76E-01 | -0.44 | 6.70E-01 |
| CACNA1G  | -0.56 | 7.12E-01 | 0.33  | 3.71E-01 | -0.07 | 5.30E-01 |
| CIC      | -0.56 | 7.12E-01 | -0.31 | 6.20E-01 | -0.02 | 5.08E-01 |
| ZNF436   | -0.56 | 7.12E-01 | 0.67  | 2.51E-01 | -0.14 | 5.56E-01 |
| XXYL1    | -0.56 | 7.12E-01 | -0.80 | 7.89E-01 | -0.11 | 5.45E-01 |
| GZF1     | -0.56 | 7.12E-01 | 0.01  | 4.94E-01 | -1.68 | 9.54E-01 |
| SHROOM1  | -0.56 | 7.12E-01 | -0.55 | 7.08E-01 | 0.41  | 3.41E-01 |
| MED20    | -0.56 | 7.13E-01 | -0.68 | 7.52E-01 | -1.18 | 8.81E-01 |
| CAPN3    | -0.56 | 7.13E-01 | -0.48 | 6.83E-01 | -0.28 | 6.11E-01 |
| FBLN7    | -0.56 | 7.13E-01 | -1.17 | 8.79E-01 | -0.07 | 5.27E-01 |
| SNX22    | -0.56 | 7.13E-01 | -0.67 | 7.49E-01 | -0.71 | 7.61E-01 |
| WDR93    | -0.56 | 7.13E-01 | -0.08 | 5.33E-01 | -1.24 | 8.93E-01 |
| CECR6    | -0.56 | 7.13E-01 | -0.28 | 6.08E-01 | 0.20  | 4.22E-01 |
| AKR1C2   | -0.56 | 7.13E-01 | 2.02  | 2.16E-02 | -1.03 | 8.49E-01 |
| MARCKS   | -0.56 | 7.13E-01 | -0.78 | 7.83E-01 | -0.79 | 7.86E-01 |
| SLC2A5   | -0.56 | 7.13E-01 | -1.63 | 9.49E-01 | 0.48  | 3.15E-01 |
| TTC5     | -0.56 | 7.13E-01 | 0.31  | 3.77E-01 | -0.50 | 6.91E-01 |

|               |       |          |       |          |       |          |
|---------------|-------|----------|-------|----------|-------|----------|
| SMG9          | -0.56 | 7.13E-01 | -1.75 | 9.60E-01 | -0.02 | 5.09E-01 |
| USP40         | -0.56 | 7.13E-01 | -0.04 | 5.18E-01 | -1.13 | 8.71E-01 |
| LIMK1         | -0.56 | 7.13E-01 | 0.23  | 4.07E-01 | -0.61 | 7.30E-01 |
| ELFN2         | -0.56 | 7.13E-01 | -0.81 | 7.90E-01 | -0.92 | 8.21E-01 |
| SMG7          | -0.56 | 7.13E-01 | 0.26  | 3.96E-01 | 1.51  | 6.53E-02 |
| SNAI3         | -0.56 | 7.13E-01 | 0.06  | 4.76E-01 | -1.45 | 9.26E-01 |
| TMEM139       | -0.56 | 7.13E-01 | -0.98 | 8.36E-01 | -0.70 | 7.59E-01 |
| MELK          | -0.56 | 7.13E-01 | -0.35 | 6.37E-01 | -0.20 | 5.79E-01 |
| ACTRT3        | -0.56 | 7.13E-01 | -0.09 | 5.35E-01 | -0.38 | 6.47E-01 |
| MUC1          | -0.56 | 7.13E-01 | -0.47 | 6.80E-01 | 0.38  | 3.52E-01 |
| C11orf91      | -0.56 | 7.13E-01 | -0.27 | 6.07E-01 | -0.08 | 5.30E-01 |
| KIAA0368      | -0.56 | 7.13E-01 | -0.51 | 6.94E-01 | 0.29  | 3.88E-01 |
| DHRS7C        | -0.56 | 7.13E-01 | -0.17 | 5.66E-01 | -0.39 | 6.52E-01 |
| IDUA          | -0.56 | 7.13E-01 | 0.56  | 2.87E-01 | 1.46  | 7.22E-02 |
| NAT10         | -0.56 | 7.13E-01 | -0.57 | 7.16E-01 | -0.88 | 8.09E-01 |
| LIN7A         | -0.56 | 7.13E-01 | -0.34 | 6.34E-01 | -1.22 | 8.88E-01 |
| TNFRSF10D     | -0.56 | 7.14E-01 | -0.49 | 6.88E-01 | -0.59 | 7.22E-01 |
| INTS7         | -0.56 | 7.14E-01 | -0.98 | 8.36E-01 | -0.03 | 5.12E-01 |
| REC8          | -0.56 | 7.14E-01 | -1.13 | 8.72E-01 | -0.34 | 6.35E-01 |
| CTD-3193O13.9 | -0.56 | 7.14E-01 | 0.39  | 3.50E-01 | 0.83  | 2.02E-01 |
| TUT1          | -0.56 | 7.14E-01 | -0.15 | 5.62E-01 | -0.04 | 5.17E-01 |
| CCDC170       | -0.56 | 7.14E-01 | 0.13  | 4.50E-01 | -0.65 | 7.43E-01 |
| SLC27A1       | -0.56 | 7.14E-01 | 0.35  | 3.65E-01 | 1.00  | 1.59E-01 |
| FOLR3         | -0.57 | 7.14E-01 | 0.19  | 4.23E-01 | -0.62 | 7.33E-01 |
| OR52J3        | -0.57 | 7.14E-01 | -0.47 | 6.81E-01 | 0.77  | 2.22E-01 |
| CCDC115       | -0.57 | 7.14E-01 | -0.01 | 5.03E-01 | 0.66  | 2.54E-01 |
| FARP1         | -0.57 | 7.14E-01 | -1.85 | 9.68E-01 | -0.50 | 6.91E-01 |
| PPID          | -0.57 | 7.14E-01 | -0.74 | 7.69E-01 | -1.03 | 8.48E-01 |
| TNFAIP8       | -0.57 | 7.14E-01 | -0.06 | 5.25E-01 | -1.47 | 9.30E-01 |
| VAPA          | -0.57 | 7.14E-01 | -1.54 | 9.38E-01 | 0.96  | 1.70E-01 |
| LIG3          | -0.57 | 7.14E-01 | -0.41 | 6.61E-01 | -1.28 | 9.00E-01 |

|               |       |          |       |          |       |          |
|---------------|-------|----------|-------|----------|-------|----------|
| HOXD11        | -0.57 | 7.14E-01 | 0.20  | 4.22E-01 | 0.32  | 3.74E-01 |
| TRRAP         | -0.57 | 7.14E-01 | -0.85 | 8.02E-01 | -0.70 | 7.57E-01 |
| CD5L          | -0.57 | 7.14E-01 | -0.13 | 5.51E-01 | 0.08  | 4.70E-01 |
| TUBA1A        | -0.57 | 7.14E-01 | -1.12 | 8.69E-01 | -1.06 | 8.55E-01 |
| OCIAD2        | -0.57 | 7.14E-01 | 0.81  | 2.09E-01 | 1.07  | 1.43E-01 |
| FABP5         | -0.57 | 7.15E-01 | -2.67 | 9.96E-01 | 0.01  | 4.97E-01 |
| DKKL1         | -0.57 | 7.15E-01 | -1.68 | 9.53E-01 | 0.44  | 3.31E-01 |
| CITED4        | -0.57 | 7.15E-01 | -1.28 | 9.00E-01 | -0.37 | 6.43E-01 |
| CWC27         | -0.57 | 7.15E-01 | 0.15  | 4.42E-01 | -0.78 | 7.83E-01 |
| MKRN3         | -0.57 | 7.15E-01 | -0.30 | 6.19E-01 | 1.27  | 1.03E-01 |
| PDHX          | -0.57 | 7.15E-01 | -0.62 | 7.34E-01 | -0.47 | 6.82E-01 |
| SLFN11        | -0.57 | 7.15E-01 | -1.63 | 9.49E-01 | -0.08 | 5.33E-01 |
| PRH2          | -0.57 | 7.15E-01 | 0.59  | 2.76E-01 | 0.95  | 1.70E-01 |
| SLC25A40      | -0.57 | 7.15E-01 | 0.16  | 4.35E-01 | -1.39 | 9.18E-01 |
| CD300LD       | -0.57 | 7.15E-01 | -0.45 | 6.73E-01 | -2.16 | 9.85E-01 |
| RNASE13       | -0.57 | 7.15E-01 | 1.22  | 1.11E-01 | -0.71 | 7.62E-01 |
| SIAH3         | -0.57 | 7.15E-01 | -1.20 | 8.85E-01 | -0.42 | 6.61E-01 |
| THEM5         | -0.57 | 7.16E-01 | -0.67 | 7.50E-01 | -0.61 | 7.28E-01 |
| GABPB1        | -0.57 | 7.16E-01 | -0.58 | 7.18E-01 | -0.76 | 7.77E-01 |
| ATL1          | -0.57 | 7.16E-01 | 0.84  | 2.01E-01 | -0.96 | 8.33E-01 |
| NUDT18        | -0.57 | 7.16E-01 | -0.22 | 5.87E-01 | 0.66  | 2.56E-01 |
| RP11-343C2.12 | -0.57 | 7.16E-01 | 0.07  | 4.71E-01 | 1.80  | 3.56E-02 |
| FCF1          | -0.57 | 7.16E-01 | -0.14 | 5.56E-01 | 1.24  | 1.07E-01 |
| PRKCI         | -0.57 | 7.16E-01 | 0.13  | 4.49E-01 | 0.27  | 3.95E-01 |
| RNF187        | -0.57 | 7.16E-01 | 0.49  | 3.12E-01 | 2.01  | 2.22E-02 |
| SUPV3L1       | -0.57 | 7.16E-01 | 0.17  | 4.32E-01 | -0.29 | 6.13E-01 |
| MIS12         | -0.57 | 7.16E-01 | -0.48 | 6.83E-01 | 1.39  | 8.29E-02 |
| COL6A3        | -0.57 | 7.16E-01 | -0.98 | 8.36E-01 | -0.34 | 6.32E-01 |
| ZDHHC19       | -0.57 | 7.16E-01 | -1.38 | 9.17E-01 | 0.59  | 2.76E-01 |
| PLD6          | -0.57 | 7.16E-01 | -1.77 | 9.62E-01 | 0.17  | 4.32E-01 |
| BLK           | -0.57 | 7.16E-01 | -0.86 | 8.04E-01 | 0.71  | 2.39E-01 |

|          |       |          |       |          |       |          |
|----------|-------|----------|-------|----------|-------|----------|
| ZDHHHC11 | -0.57 | 7.16E-01 | -0.20 | 5.80E-01 | -1.37 | 9.14E-01 |
| SEC11A   | -0.57 | 7.16E-01 | -0.99 | 8.40E-01 | 0.16  | 4.37E-01 |
| WDYHV1   | -0.57 | 7.17E-01 | -0.66 | 7.44E-01 | 0.68  | 2.48E-01 |
| G3BP1    | -0.57 | 7.17E-01 | 0.68  | 2.50E-01 | 0.48  | 3.16E-01 |
| NAMPTL   | -0.57 | 7.17E-01 | -0.63 | 7.35E-01 | -1.37 | 9.14E-01 |
| MLLT4    | -0.57 | 7.17E-01 | -0.53 | 7.02E-01 | -0.39 | 6.52E-01 |
| RPUSD3   | -0.57 | 7.17E-01 | -1.47 | 9.29E-01 | 0.21  | 4.16E-01 |
| SIGLEC7  | -0.57 | 7.17E-01 | -0.20 | 5.81E-01 | 0.72  | 2.36E-01 |
| PIP      | -0.57 | 7.17E-01 | -1.34 | 9.10E-01 | -0.20 | 5.79E-01 |
| POU4F1   | -0.57 | 7.17E-01 | 0.29  | 3.87E-01 | 0.46  | 3.23E-01 |
| SAFB     | -0.57 | 7.17E-01 | 0.11  | 4.55E-01 | 1.21  | 1.14E-01 |
| HOXC13   | -0.57 | 7.17E-01 | -0.44 | 6.70E-01 | -0.37 | 6.45E-01 |
| C2orf76  | -0.57 | 7.17E-01 | -1.51 | 9.35E-01 | 0.47  | 3.18E-01 |
| OPCML    | -0.57 | 7.17E-01 | -1.93 | 9.73E-01 | 1.11  | 1.33E-01 |
| ASPG     | -0.57 | 7.17E-01 | 0.30  | 3.80E-01 | 1.42  | 7.81E-02 |
| ZNF433   | -0.57 | 7.17E-01 | -0.48 | 6.85E-01 | -0.58 | 7.20E-01 |
| SHROOM3  | -0.57 | 7.17E-01 | -1.03 | 8.48E-01 | -0.79 | 7.86E-01 |
| ADORA2B  | -0.57 | 7.17E-01 | -1.23 | 8.90E-01 | -0.09 | 5.35E-01 |
| ZNF530   | -0.57 | 7.17E-01 | -0.18 | 5.73E-01 | -2.04 | 9.79E-01 |
| LILRA3   | -0.57 | 7.17E-01 | 0.55  | 2.90E-01 | 0.16  | 4.35E-01 |
| MEOX2    | -0.57 | 7.17E-01 | 0.28  | 3.90E-01 | 0.37  | 3.56E-01 |
| EGFR     | -0.57 | 7.17E-01 | -1.97 | 9.75E-01 | -0.45 | 6.74E-01 |
| IPO9     | -0.57 | 7.17E-01 | -1.36 | 9.13E-01 | 0.42  | 3.35E-01 |
| KIAA0141 | -0.57 | 7.17E-01 | 0.34  | 3.65E-01 | -1.15 | 8.75E-01 |
| ZSCAN20  | -0.58 | 7.17E-01 | -0.52 | 6.97E-01 | -0.16 | 5.64E-01 |
| PRAM1    | -0.58 | 7.17E-01 | -0.91 | 8.19E-01 | -0.36 | 6.39E-01 |
| ECEL1    | -0.58 | 7.18E-01 | 0.41  | 3.40E-01 | 0.05  | 4.80E-01 |
| RGS17    | -0.58 | 7.18E-01 | 0.28  | 3.91E-01 | -0.47 | 6.82E-01 |
| SGCA     | -0.58 | 7.18E-01 | -0.49 | 6.89E-01 | -1.42 | 9.23E-01 |
| GNG4     | -0.58 | 7.18E-01 | 0.71  | 2.37E-01 | 0.30  | 3.83E-01 |
| LYSMD3   | -0.58 | 7.18E-01 | -0.66 | 7.45E-01 | 0.18  | 4.30E-01 |

|            |       |          |       |          |       |          |
|------------|-------|----------|-------|----------|-------|----------|
| MPL        | -0.58 | 7.18E-01 | -0.49 | 6.89E-01 | -0.42 | 6.62E-01 |
| SPIN1      | -0.58 | 7.18E-01 | -0.21 | 5.83E-01 | -0.83 | 7.97E-01 |
| VPS36      | -0.58 | 7.18E-01 | -0.50 | 6.92E-01 | 0.43  | 3.33E-01 |
| PACSLN3    | -0.58 | 7.18E-01 | -0.93 | 8.24E-01 | -0.57 | 7.14E-01 |
| TNFRSF18   | -0.58 | 7.18E-01 | -0.54 | 7.05E-01 | -0.85 | 8.03E-01 |
| CCDC19     | -0.58 | 7.18E-01 | -1.64 | 9.49E-01 | -0.03 | 5.10E-01 |
| WFDC5      | -0.58 | 7.18E-01 | -2.35 | 9.91E-01 | 0.18  | 4.30E-01 |
| PYHIN1     | -0.58 | 7.18E-01 | -0.30 | 6.17E-01 | 0.37  | 3.55E-01 |
| POMP       | -0.58 | 7.18E-01 | -0.67 | 7.49E-01 | -0.82 | 7.94E-01 |
| HBB        | -0.58 | 7.18E-01 | -1.19 | 8.82E-01 | -0.15 | 5.60E-01 |
| RPL37      | -0.58 | 7.18E-01 | -0.58 | 7.18E-01 | 0.15  | 4.39E-01 |
| PTGER1     | -0.58 | 7.18E-01 | -0.17 | 5.69E-01 | -1.24 | 8.92E-01 |
| CMAS       | -0.58 | 7.18E-01 | -1.44 | 9.25E-01 | -0.44 | 6.71E-01 |
| DCAF4L2    | -0.58 | 7.18E-01 | -0.35 | 6.35E-01 | -1.33 | 9.08E-01 |
| ALB        | -0.58 | 7.19E-01 | -0.79 | 7.87E-01 | -0.44 | 6.72E-01 |
| ARFIP2     | -0.58 | 7.19E-01 | -0.85 | 8.03E-01 | -0.76 | 7.78E-01 |
| TSEN15     | -0.58 | 7.19E-01 | -0.34 | 6.32E-01 | 0.57  | 2.85E-01 |
| TPRX1      | -0.58 | 7.19E-01 | -0.30 | 6.16E-01 | -0.82 | 7.94E-01 |
| C14orf166B | -0.58 | 7.19E-01 | -1.68 | 9.53E-01 | 0.10  | 4.60E-01 |
| OCIAD1     | -0.58 | 7.19E-01 | 0.43  | 3.34E-01 | -0.40 | 6.54E-01 |
| FGFR1OP2   | -0.58 | 7.19E-01 | -0.16 | 5.63E-01 | -1.35 | 9.12E-01 |
| GTF3C2     | -0.58 | 7.19E-01 | -0.14 | 5.56E-01 | 1.36  | 8.63E-02 |
| TPCN2      | -0.58 | 7.19E-01 | 0.56  | 2.87E-01 | 1.16  | 1.24E-01 |
| WDR96      | -0.58 | 7.19E-01 | 1.48  | 6.97E-02 | 0.55  | 2.91E-01 |
| NCAPG2     | -0.58 | 7.19E-01 | -0.03 | 5.11E-01 | -1.94 | 9.74E-01 |
| OR8A1      | -0.58 | 7.19E-01 | 0.64  | 2.60E-01 | -0.83 | 7.98E-01 |
| PANK1      | -0.58 | 7.19E-01 | -0.44 | 6.70E-01 | -0.35 | 6.36E-01 |
| CSPG4      | -0.58 | 7.19E-01 | 0.17  | 4.34E-01 | -0.16 | 5.62E-01 |
| TMEM30A    | -0.58 | 7.19E-01 | -0.47 | 6.82E-01 | 0.66  | 2.53E-01 |
| APOA1      | -0.58 | 7.19E-01 | -0.88 | 8.10E-01 | -0.17 | 5.68E-01 |
| KDM4E      | -0.58 | 7.19E-01 | 0.41  | 3.41E-01 | -1.91 | 9.72E-01 |

|              |       |          |       |          |       |          |
|--------------|-------|----------|-------|----------|-------|----------|
| METTL2B      | -0.58 | 7.19E-01 | -0.37 | 6.43E-01 | -2.36 | 9.91E-01 |
| ZNF34        | -0.58 | 7.19E-01 | -0.48 | 6.85E-01 | -0.44 | 6.71E-01 |
| FADD         | -0.58 | 7.20E-01 | 0.04  | 4.85E-01 | -0.23 | 5.91E-01 |
| UGT2B15      | -0.58 | 7.20E-01 | -0.29 | 6.13E-01 | 1.55  | 6.10E-02 |
| TCP10        | -0.58 | 7.20E-01 | 0.93  | 1.75E-01 | -0.16 | 5.65E-01 |
| RNMT         | -0.58 | 7.20E-01 | 0.11  | 4.58E-01 | -0.60 | 7.27E-01 |
| CTD-3203P2.2 | -0.58 | 7.20E-01 | 0.59  | 2.76E-01 | -0.92 | 8.22E-01 |
| BSND         | -0.58 | 7.20E-01 | -1.17 | 8.80E-01 | -0.29 | 6.14E-01 |
| CXCL14       | -0.58 | 7.20E-01 | -1.51 | 9.35E-01 | 0.56  | 2.89E-01 |
| ADAM20       | -0.58 | 7.20E-01 | 0.71  | 2.39E-01 | -0.07 | 5.29E-01 |
| PDZK1        | -0.58 | 7.20E-01 | -1.01 | 8.44E-01 | -0.45 | 6.73E-01 |
| TSN          | -0.58 | 7.20E-01 | 0.34  | 3.67E-01 | -0.48 | 6.84E-01 |
| PIGH         | -0.58 | 7.20E-01 | 0.41  | 3.39E-01 | -0.64 | 7.39E-01 |
| XRCC4        | -0.58 | 7.20E-01 | 0.72  | 2.36E-01 | 0.75  | 2.28E-01 |
| COQ2         | -0.58 | 7.20E-01 | 1.37  | 8.53E-02 | 0.32  | 3.76E-01 |
| SLC1A7       | -0.58 | 7.20E-01 | 0.16  | 4.35E-01 | -0.60 | 7.27E-01 |
| POFUT2       | -0.58 | 7.20E-01 | 1.21  | 1.13E-01 | 0.99  | 1.60E-01 |
| GCG          | -0.58 | 7.20E-01 | -0.70 | 7.57E-01 | -0.94 | 8.25E-01 |
| GNS          | -0.58 | 7.20E-01 | -0.77 | 7.79E-01 | -0.96 | 8.31E-01 |
| UBOX5        | -0.58 | 7.20E-01 | -2.03 | 9.79E-01 | 0.48  | 3.16E-01 |
| PPP1R15A     | -0.58 | 7.20E-01 | -0.60 | 7.24E-01 | -1.43 | 9.23E-01 |
| SLMO1        | -0.58 | 7.20E-01 | -0.24 | 5.95E-01 | -0.28 | 6.09E-01 |
| BRICD5       | -0.58 | 7.20E-01 | 0.26  | 3.98E-01 | -1.72 | 9.58E-01 |
| FAM26E       | -0.58 | 7.20E-01 | -0.09 | 5.35E-01 | 0.04  | 4.82E-01 |
| SPRR2A       | -0.58 | 7.20E-01 | -0.64 | 7.40E-01 | -0.42 | 6.61E-01 |
| OBFC1        | -0.58 | 7.21E-01 | 0.52  | 3.01E-01 | -0.90 | 8.17E-01 |
| KRTAP15-1    | -0.58 | 7.21E-01 | -0.13 | 5.53E-01 | -0.97 | 8.33E-01 |
| GIMAP5       | -0.58 | 7.21E-01 | -0.29 | 6.12E-01 | -0.07 | 5.29E-01 |
| ZAR1L        | -0.58 | 7.21E-01 | -1.52 | 9.36E-01 | 0.17  | 4.34E-01 |
| AIG1         | -0.58 | 7.21E-01 | 0.27  | 3.93E-01 | -1.10 | 8.65E-01 |
| TRIM68       | -0.58 | 7.21E-01 | 0.34  | 3.67E-01 | 1.10  | 1.36E-01 |

|             |       |          |       |          |       |          |
|-------------|-------|----------|-------|----------|-------|----------|
| MATN4       | -0.58 | 7.21E-01 | -0.48 | 6.85E-01 | -1.43 | 9.24E-01 |
| TNFRSF1B    | -0.58 | 7.21E-01 | -1.28 | 9.00E-01 | -0.54 | 7.07E-01 |
| PSMD6       | -0.59 | 7.21E-01 | 0.69  | 2.44E-01 | -0.14 | 5.56E-01 |
| PALM2-AKAP2 | -0.59 | 7.21E-01 | -0.65 | 7.43E-01 | -1.23 | 8.90E-01 |
| AKAP2       | -0.59 | 7.21E-01 | -0.65 | 7.43E-01 | -1.23 | 8.90E-01 |
| ISG20       | -0.59 | 7.21E-01 | -1.25 | 8.95E-01 | 0.67  | 2.51E-01 |
| SPATA6      | -0.59 | 7.21E-01 | 0.54  | 2.94E-01 | 0.03  | 4.87E-01 |
| PGM2L1      | -0.59 | 7.21E-01 | -0.81 | 7.92E-01 | 0.01  | 4.96E-01 |
| CNOT2       | -0.59 | 7.21E-01 | 0.45  | 3.25E-01 | 1.23  | 1.10E-01 |
| PRPF38B     | -0.59 | 7.21E-01 | -1.16 | 8.76E-01 | -0.34 | 6.32E-01 |
| KANK3       | -0.59 | 7.22E-01 | -0.51 | 6.95E-01 | -0.63 | 7.34E-01 |
| C7orf57     | -0.59 | 7.22E-01 | -1.02 | 8.47E-01 | 1.06  | 1.44E-01 |
| SARM1       | -0.59 | 7.22E-01 | -0.87 | 8.09E-01 | -0.93 | 8.23E-01 |
| FAM188A     | -0.59 | 7.22E-01 | 0.18  | 4.30E-01 | -0.22 | 5.86E-01 |
| CYP2A7      | -0.59 | 7.22E-01 | -0.76 | 7.75E-01 | -0.63 | 7.35E-01 |
| PIAS3       | -0.59 | 7.22E-01 | -0.15 | 5.60E-01 | -1.53 | 9.37E-01 |
| SYT16       | -0.59 | 7.22E-01 | -0.86 | 8.06E-01 | -0.08 | 5.31E-01 |
| PCDHB1      | -0.59 | 7.22E-01 | -0.19 | 5.76E-01 | -0.85 | 8.03E-01 |
| RMI1        | -0.59 | 7.22E-01 | 0.04  | 4.83E-01 | 0.88  | 1.90E-01 |
| FNIP2       | -0.59 | 7.22E-01 | -0.62 | 7.31E-01 | -0.62 | 7.32E-01 |
| ADAMTS20    | -0.59 | 7.22E-01 | -0.10 | 5.41E-01 | 0.32  | 3.76E-01 |
| PLA2G4D     | -0.59 | 7.22E-01 | 1.67  | 4.70E-02 | 0.87  | 1.92E-01 |
| ADAMTS5     | -0.59 | 7.22E-01 | -0.83 | 7.97E-01 | -0.43 | 6.66E-01 |
| SQRDL       | -0.59 | 7.22E-01 | -0.24 | 5.96E-01 | -1.15 | 8.74E-01 |
| B3GNT7      | -0.59 | 7.22E-01 | 0.95  | 1.71E-01 | 0.01  | 4.96E-01 |
| SMIM11      | -0.59 | 7.22E-01 | -0.99 | 8.39E-01 | -0.85 | 8.02E-01 |
| SLC41A2     | -0.59 | 7.22E-01 | -1.67 | 9.53E-01 | 0.00  | 5.02E-01 |
| PSME1       | -0.59 | 7.23E-01 | -1.20 | 8.86E-01 | 0.19  | 4.23E-01 |
| TLE6        | -0.59 | 7.23E-01 | -0.70 | 7.57E-01 | 0.32  | 3.75E-01 |
| AKR1CL1     | -0.59 | 7.23E-01 | -1.52 | 9.35E-01 | -0.81 | 7.92E-01 |
| MICAL3      | -0.59 | 7.23E-01 | -0.59 | 7.22E-01 | -1.72 | 9.57E-01 |

|          |       |          |       |          |       |          |
|----------|-------|----------|-------|----------|-------|----------|
| FAF2     | -0.59 | 7.23E-01 | 0.54  | 2.94E-01 | -1.20 | 8.85E-01 |
| RPS19BP1 | -0.59 | 7.23E-01 | 0.07  | 4.71E-01 | -1.85 | 9.68E-01 |
| TMEM150B | -0.59 | 7.23E-01 | -0.49 | 6.89E-01 | -0.53 | 7.04E-01 |
| ANXA3    | -0.59 | 7.23E-01 | -0.28 | 6.12E-01 | -0.06 | 5.22E-01 |
| TMEM200A | -0.59 | 7.23E-01 | -0.64 | 7.37E-01 | 0.06  | 4.78E-01 |
| PKIG     | -0.59 | 7.23E-01 | 0.24  | 4.04E-01 | -0.09 | 5.36E-01 |
| INHA     | -0.59 | 7.23E-01 | -0.04 | 5.17E-01 | -0.42 | 6.61E-01 |
| CLHC1    | -0.59 | 7.23E-01 | -0.52 | 6.97E-01 | -1.14 | 8.73E-01 |
| MTMR7    | -0.59 | 7.23E-01 | -0.05 | 5.21E-01 | -1.11 | 8.67E-01 |
| ZNF286B  | -0.59 | 7.23E-01 | -0.01 | 5.02E-01 | -1.69 | 9.55E-01 |
| NCBP2    | -0.59 | 7.23E-01 | -1.50 | 9.34E-01 | 0.21  | 4.18E-01 |
| ERO1L    | -0.59 | 7.23E-01 | 0.04  | 4.86E-01 | 1.25  | 1.05E-01 |
| TCP10L   | -0.59 | 7.23E-01 | 0.17  | 4.32E-01 | 0.36  | 3.60E-01 |
| OLA1     | -0.59 | 7.24E-01 | -0.37 | 6.46E-01 | 0.24  | 4.06E-01 |
| SOCS7    | -0.59 | 7.24E-01 | -1.05 | 8.53E-01 | 0.95  | 1.71E-01 |
| IRS2     | -0.59 | 7.24E-01 | 0.00  | 4.99E-01 | 1.11  | 1.33E-01 |
| SPSB2    | -0.59 | 7.24E-01 | -0.28 | 6.09E-01 | 0.38  | 3.53E-01 |
| PEX5L    | -0.59 | 7.24E-01 | -1.02 | 8.46E-01 | 1.32  | 9.39E-02 |
| RHCG     | -0.59 | 7.24E-01 | -1.05 | 8.54E-01 | 0.88  | 1.90E-01 |
| HRASLS5  | -0.59 | 7.24E-01 | -0.38 | 6.48E-01 | -0.52 | 6.97E-01 |
| PRG4     | -0.59 | 7.24E-01 | -1.03 | 8.49E-01 | -0.97 | 8.34E-01 |
| DUSP11   | -0.59 | 7.24E-01 | -0.42 | 6.64E-01 | -1.08 | 8.59E-01 |
| APP      | -0.59 | 7.24E-01 | -1.84 | 9.67E-01 | -0.09 | 5.36E-01 |
| ZHX1     | -0.59 | 7.24E-01 | 1.17  | 1.22E-01 | -0.22 | 5.89E-01 |
| KIF25    | -0.59 | 7.24E-01 | -0.63 | 7.34E-01 | -1.15 | 8.75E-01 |
| OR2L13   | -0.59 | 7.24E-01 | -0.09 | 5.34E-01 | 0.47  | 3.20E-01 |
| ITGA3    | -0.59 | 7.24E-01 | 1.42  | 7.77E-02 | -0.64 | 7.40E-01 |
| C9orf114 | -0.60 | 7.24E-01 | -0.62 | 7.31E-01 | -0.07 | 5.28E-01 |
| DDTL     | -0.60 | 7.24E-01 | -0.81 | 7.91E-01 | -0.12 | 5.47E-01 |
| ALDOC    | -0.60 | 7.24E-01 | 1.48  | 7.00E-02 | 0.58  | 2.80E-01 |
| MAPK3    | -0.60 | 7.24E-01 | 0.18  | 4.30E-01 | -0.19 | 5.76E-01 |



|           |       |          |       |          |       |          |
|-----------|-------|----------|-------|----------|-------|----------|
| CPA3      | -0.60 | 7.24E-01 | -1.68 | 9.53E-01 | -0.29 | 6.15E-01 |
| NAV1      | -0.60 | 7.24E-01 | -1.29 | 9.02E-01 | -1.19 | 8.83E-01 |
| TMCC3     | -0.60 | 7.24E-01 | 0.01  | 4.97E-01 | -0.99 | 8.40E-01 |
| ITPKA     | -0.60 | 7.24E-01 | -0.55 | 7.09E-01 | -1.30 | 9.03E-01 |
| EPN3      | -0.60 | 7.25E-01 | -1.14 | 8.73E-01 | 0.48  | 3.16E-01 |
| RNASEH1   | -0.60 | 7.25E-01 | -0.97 | 8.34E-01 | -0.92 | 8.22E-01 |
| ANKK1     | -0.60 | 7.25E-01 | -0.85 | 8.04E-01 | -1.22 | 8.90E-01 |
| C14orf159 | -0.60 | 7.25E-01 | 0.05  | 4.79E-01 | 0.73  | 2.32E-01 |
| LINC01098 | -0.60 | 7.25E-01 | 1.12  | 1.31E-01 | -1.34 | 9.09E-01 |
| TRIT1     | -0.60 | 7.25E-01 | -1.83 | 9.66E-01 | -0.37 | 6.44E-01 |
| TSPAN1    | -0.60 | 7.25E-01 | 0.55  | 2.91E-01 | 0.39  | 3.48E-01 |
| CENPBD1   | -0.60 | 7.25E-01 | 0.32  | 3.75E-01 | 0.82  | 2.05E-01 |
| SLC38A9   | -0.60 | 7.25E-01 | -0.35 | 6.35E-01 | -0.85 | 8.03E-01 |
| ITGB6     | -0.60 | 7.25E-01 | 0.02  | 4.90E-01 | -0.78 | 7.81E-01 |
| FAM122A   | -0.60 | 7.25E-01 | 1.03  | 1.52E-01 | 0.68  | 2.48E-01 |
| BCL2A1    | -0.60 | 7.25E-01 | 0.20  | 4.22E-01 | 1.33  | 9.16E-02 |
| UBE3C     | -0.60 | 7.25E-01 | 0.27  | 3.94E-01 | 1.55  | 6.08E-02 |
| PSMD1     | -0.60 | 7.25E-01 | 0.33  | 3.72E-01 | -0.63 | 7.36E-01 |
| OR13C8    | -0.60 | 7.25E-01 | -0.37 | 6.45E-01 | 0.54  | 2.95E-01 |
| CEP350    | -0.60 | 7.25E-01 | -0.88 | 8.10E-01 | -0.29 | 6.14E-01 |
| QTRT1     | -0.60 | 7.25E-01 | -0.22 | 5.89E-01 | -0.32 | 6.25E-01 |
| TERF1     | -0.60 | 7.25E-01 | -0.56 | 7.11E-01 | -0.01 | 5.05E-01 |
| TMEM244   | -0.60 | 7.25E-01 | 0.13  | 4.48E-01 | -0.69 | 7.56E-01 |
| WNT8A     | -0.60 | 7.25E-01 | -0.12 | 5.48E-01 | 1.10  | 1.35E-01 |
| TXNDC15   | -0.60 | 7.25E-01 | -1.77 | 9.62E-01 | -0.02 | 5.08E-01 |
| CDKN2AIP  | -0.60 | 7.26E-01 | 0.72  | 2.36E-01 | 0.16  | 4.35E-01 |
| FPR2      | -0.60 | 7.26E-01 | -0.77 | 7.78E-01 | -1.09 | 8.63E-01 |
| NANP      | -0.60 | 7.26E-01 | 0.58  | 2.81E-01 | 0.11  | 4.58E-01 |
| RARB      | -0.60 | 7.26E-01 | 0.15  | 4.39E-01 | 0.46  | 3.21E-01 |
| LRRC8C    | -0.60 | 7.26E-01 | -0.34 | 6.34E-01 | -0.74 | 7.71E-01 |
| LIMD2     | -0.60 | 7.26E-01 | -0.96 | 8.33E-01 | -1.06 | 8.56E-01 |

|          |       |          |       |          |       |          |
|----------|-------|----------|-------|----------|-------|----------|
| INO80E   | -0.60 | 7.26E-01 | -1.55 | 9.39E-01 | -0.54 | 7.05E-01 |
| FAM111B  | -0.60 | 7.26E-01 | -1.46 | 9.27E-01 | -0.58 | 7.20E-01 |
| GGPS1    | -0.60 | 7.26E-01 | -0.68 | 7.53E-01 | -0.80 | 7.89E-01 |
| UTP23    | -0.60 | 7.26E-01 | -0.14 | 5.57E-01 | 0.05  | 4.82E-01 |
| SST      | -0.60 | 7.26E-01 | -1.13 | 8.70E-01 | -1.07 | 8.57E-01 |
| TPD52L2  | -0.60 | 7.26E-01 | 1.44  | 7.49E-02 | 0.37  | 3.57E-01 |
| MFSD11   | -0.60 | 7.26E-01 | -0.33 | 6.30E-01 | -1.66 | 9.51E-01 |
| BTNL3    | -0.60 | 7.26E-01 | -0.12 | 5.48E-01 | 0.03  | 4.86E-01 |
| NT5DC3   | -0.60 | 7.26E-01 | 0.34  | 3.66E-01 | 0.96  | 1.68E-01 |
| ARL10    | -0.60 | 7.26E-01 | -0.61 | 7.30E-01 | -1.35 | 9.11E-01 |
| RFC4     | -0.60 | 7.26E-01 | -1.05 | 8.54E-01 | 0.04  | 4.83E-01 |
| WDR37    | -0.60 | 7.27E-01 | -0.42 | 6.63E-01 | 0.80  | 2.11E-01 |
| TBC1D26  | -0.60 | 7.27E-01 | -1.66 | 9.52E-01 | -0.71 | 7.60E-01 |
| METTL3   | -0.60 | 7.27E-01 | 1.36  | 8.69E-02 | 0.36  | 3.61E-01 |
| ZNF12    | -0.60 | 7.27E-01 | -1.49 | 9.32E-01 | 1.60  | 5.45E-02 |
| ATF3     | -0.60 | 7.27E-01 | -1.31 | 9.05E-01 | 0.25  | 4.02E-01 |
| ANXA10   | -0.60 | 7.27E-01 | 0.17  | 4.34E-01 | 0.20  | 4.22E-01 |
| SPINK6   | -0.60 | 7.27E-01 | -0.90 | 8.16E-01 | -0.40 | 6.54E-01 |
| HMGCLL1  | -0.60 | 7.27E-01 | 0.02  | 4.90E-01 | 1.14  | 1.28E-01 |
| SLC34A2  | -0.60 | 7.27E-01 | 0.81  | 2.09E-01 | -1.25 | 8.94E-01 |
| GTF3C4   | -0.60 | 7.27E-01 | -0.51 | 6.95E-01 | -0.14 | 5.58E-01 |
| CNTNAP1  | -0.60 | 7.27E-01 | -1.04 | 8.51E-01 | -0.24 | 5.96E-01 |
| ABHD1    | -0.60 | 7.27E-01 | 0.05  | 4.78E-01 | -1.37 | 9.14E-01 |
| C19orf73 | -0.60 | 7.27E-01 | -1.06 | 8.56E-01 | -0.58 | 7.20E-01 |
| TXNRD3   | -0.60 | 7.27E-01 | 0.02  | 4.91E-01 | -1.47 | 9.30E-01 |
| TUFT1    | -0.60 | 7.27E-01 | 0.30  | 3.83E-01 | -2.10 | 9.82E-01 |
| GLIS2    | -0.60 | 7.27E-01 | -0.68 | 7.50E-01 | 0.26  | 3.98E-01 |
| TMEM143  | -0.60 | 7.27E-01 | -0.33 | 6.31E-01 | -0.46 | 6.79E-01 |
| CYB5R2   | -0.60 | 7.27E-01 | 0.24  | 4.05E-01 | 0.02  | 4.94E-01 |
| SLC35G1  | -0.60 | 7.27E-01 | 0.72  | 2.37E-01 | -0.54 | 7.07E-01 |
| BOC      | -0.60 | 7.27E-01 | 0.69  | 2.46E-01 | -0.59 | 7.22E-01 |

|          |       |          |       |          |       |          |
|----------|-------|----------|-------|----------|-------|----------|
| UTP15    | -0.60 | 7.27E-01 | -0.86 | 8.06E-01 | -0.63 | 7.36E-01 |
| NLRP2    | -0.60 | 7.27E-01 | -0.61 | 7.30E-01 | -0.94 | 8.27E-01 |
| PRMT3    | -0.61 | 7.27E-01 | 0.01  | 4.94E-01 | 0.37  | 3.56E-01 |
| HNRNPAB  | -0.61 | 7.27E-01 | -0.37 | 6.45E-01 | -0.88 | 8.09E-01 |
| COLGALT1 | -0.61 | 7.27E-01 | -0.46 | 6.78E-01 | -0.83 | 7.97E-01 |
| FKBP7    | -0.61 | 7.28E-01 | -0.45 | 6.72E-01 | -1.22 | 8.88E-01 |
| RNF44    | -0.61 | 7.28E-01 | -0.27 | 6.08E-01 | -1.00 | 8.41E-01 |
| FKBP1C   | -0.61 | 7.28E-01 | 0.18  | 4.29E-01 | -0.72 | 7.65E-01 |
| RALGPS1  | -0.61 | 7.28E-01 | -0.94 | 8.26E-01 | -1.08 | 8.59E-01 |
| RNASE9   | -0.61 | 7.28E-01 | 0.22  | 4.11E-01 | -1.31 | 9.05E-01 |
| TIGD2    | -0.61 | 7.28E-01 | -0.13 | 5.51E-01 | 0.56  | 2.87E-01 |
| GSX2     | -0.61 | 7.28E-01 | 0.56  | 2.87E-01 | 1.03  | 1.52E-01 |
| VPS41    | -0.61 | 7.28E-01 | -1.09 | 8.63E-01 | -0.69 | 7.55E-01 |
| DPPA4    | -0.61 | 7.28E-01 | -1.37 | 9.15E-01 | -0.68 | 7.53E-01 |
| VOPP1    | -0.61 | 7.28E-01 | -0.13 | 5.51E-01 | -1.11 | 8.67E-01 |
| PPP3R1   | -0.61 | 7.28E-01 | 0.22  | 4.12E-01 | -0.43 | 6.66E-01 |
| SLFN5    | -0.61 | 7.28E-01 | 0.34  | 3.67E-01 | -0.95 | 8.30E-01 |
| TMEM110  | -0.61 | 7.28E-01 | 0.32  | 3.75E-01 | 1.37  | 8.48E-02 |
| TGM1     | -0.61 | 7.28E-01 | 0.24  | 4.03E-01 | 0.20  | 4.21E-01 |
| HVCN1    | -0.61 | 7.28E-01 | -1.36 | 9.13E-01 | -0.86 | 8.04E-01 |
| HS1BP3   | -0.61 | 7.28E-01 | 0.15  | 4.40E-01 | -0.13 | 5.50E-01 |
| CD1C     | -0.61 | 7.28E-01 | -0.25 | 5.99E-01 | -1.44 | 9.26E-01 |
| FAM180B  | -0.61 | 7.28E-01 | -1.11 | 8.67E-01 | -0.47 | 6.80E-01 |
| C1orf35  | -0.61 | 7.28E-01 | 0.43  | 3.34E-01 | -0.70 | 7.58E-01 |
| KIAA1958 | -0.61 | 7.28E-01 | -0.18 | 5.71E-01 | -0.27 | 6.07E-01 |
| RHBDL2   | -0.61 | 7.28E-01 | -0.27 | 6.06E-01 | 0.55  | 2.91E-01 |
| ERGIC3   | -0.61 | 7.29E-01 | -1.28 | 9.00E-01 | -1.04 | 8.51E-01 |
| APOL6    | -0.61 | 7.29E-01 | 0.35  | 3.62E-01 | -0.39 | 6.51E-01 |
| TRIM23   | -0.61 | 7.29E-01 | -0.99 | 8.39E-01 | 0.01  | 4.94E-01 |
| PSMG2    | -0.61 | 7.29E-01 | 0.74  | 2.31E-01 | -0.67 | 7.48E-01 |
| EFCAB9   | -0.61 | 7.29E-01 | 1.09  | 1.39E-01 | -0.20 | 5.81E-01 |

|          |       |          |       |          |       |          |
|----------|-------|----------|-------|----------|-------|----------|
| WDR62    | -0.61 | 7.29E-01 | -0.05 | 5.20E-01 | -1.17 | 8.78E-01 |
| AGO1     | -0.61 | 7.29E-01 | -0.07 | 5.27E-01 | 0.33  | 3.72E-01 |
| WNT8B    | -0.61 | 7.29E-01 | -1.90 | 9.72E-01 | 0.01  | 4.94E-01 |
| HAGH     | -0.61 | 7.29E-01 | -0.05 | 5.19E-01 | 0.12  | 4.50E-01 |
| MRPL28   | -0.61 | 7.29E-01 | -1.17 | 8.78E-01 | 0.71  | 2.39E-01 |
| AKT2     | -0.61 | 7.29E-01 | 1.07  | 1.43E-01 | 0.51  | 3.06E-01 |
| TAF6L    | -0.61 | 7.29E-01 | -1.06 | 8.56E-01 | -0.64 | 7.37E-01 |
| AGPAT4   | -0.61 | 7.29E-01 | -0.03 | 5.13E-01 | -0.31 | 6.21E-01 |
| URAD     | -0.61 | 7.29E-01 | 0.68  | 2.48E-01 | 0.00  | 4.98E-01 |
| RIOK1    | -0.61 | 7.29E-01 | -1.24 | 8.93E-01 | -0.41 | 6.60E-01 |
| NETO1    | -0.61 | 7.29E-01 | -0.13 | 5.50E-01 | -0.97 | 8.34E-01 |
| KIAA2013 | -0.61 | 7.29E-01 | -1.19 | 8.84E-01 | -0.07 | 5.26E-01 |
| OXER1    | -0.61 | 7.29E-01 | -0.73 | 7.66E-01 | 0.08  | 4.67E-01 |
| HSD17B14 | -0.61 | 7.29E-01 | 0.16  | 4.38E-01 | -1.88 | 9.70E-01 |
| REP15    | -0.61 | 7.29E-01 | 1.22  | 1.10E-01 | 0.72  | 2.37E-01 |
| RNASE8   | -0.61 | 7.29E-01 | 0.44  | 3.29E-01 | 1.20  | 1.15E-01 |
| CCDC163P | -0.61 | 7.29E-01 | -0.40 | 6.55E-01 | -1.52 | 9.36E-01 |
| ARID4A   | -0.61 | 7.29E-01 | 0.90  | 1.84E-01 | 1.09  | 1.38E-01 |
| JARID2   | -0.61 | 7.29E-01 | 0.08  | 4.69E-01 | -0.95 | 8.29E-01 |
| MARVELD2 | -0.61 | 7.29E-01 | -0.91 | 8.19E-01 | -0.95 | 8.29E-01 |
| SRSF2    | -0.61 | 7.29E-01 | -0.07 | 5.26E-01 | -2.13 | 9.83E-01 |
| ARMC3    | -0.61 | 7.29E-01 | -1.06 | 8.54E-01 | 0.50  | 3.09E-01 |
| WBSCR28  | -0.61 | 7.30E-01 | -0.41 | 6.60E-01 | -1.48 | 9.30E-01 |
| IPO7     | -0.61 | 7.30E-01 | -1.11 | 8.66E-01 | 1.09  | 1.39E-01 |
| HSP90AA1 | -0.61 | 7.30E-01 | 0.47  | 3.19E-01 | -0.30 | 6.17E-01 |
| DNAJC2   | -0.61 | 7.30E-01 | -1.13 | 8.71E-01 | -0.16 | 5.64E-01 |
| SNRPA1   | -0.61 | 7.30E-01 | 0.41  | 3.41E-01 | -0.04 | 5.16E-01 |
| F2R      | -0.61 | 7.30E-01 | -0.44 | 6.69E-01 | -0.48 | 6.84E-01 |
| ARL11    | -0.61 | 7.30E-01 | -1.29 | 9.01E-01 | 1.26  | 1.04E-01 |
| RBM48    | -0.61 | 7.30E-01 | -1.02 | 8.46E-01 | -0.15 | 5.60E-01 |
| BCAS3    | -0.61 | 7.30E-01 | -0.98 | 8.35E-01 | -0.38 | 6.47E-01 |

|          |       |          |       |          |       |          |
|----------|-------|----------|-------|----------|-------|----------|
| ZC3H12C  | -0.61 | 7.30E-01 | -0.71 | 7.62E-01 | 0.10  | 4.59E-01 |
| LYPD5    | -0.61 | 7.30E-01 | -0.92 | 8.21E-01 | -0.47 | 6.80E-01 |
| MAP4K1   | -0.61 | 7.30E-01 | -0.44 | 6.71E-01 | -0.28 | 6.11E-01 |
| RHCE     | -0.61 | 7.30E-01 | 0.62  | 2.68E-01 | 1.48  | 6.96E-02 |
| TMEM106C | -0.61 | 7.30E-01 | -0.14 | 5.56E-01 | -2.10 | 9.82E-01 |
| ARHGAP32 | -0.61 | 7.30E-01 | -0.27 | 6.08E-01 | 1.56  | 5.90E-02 |
| ERN2     | -0.61 | 7.30E-01 | 1.00  | 1.58E-01 | -0.82 | 7.94E-01 |
| CA9      | -0.61 | 7.30E-01 | -0.31 | 6.24E-01 | 0.47  | 3.19E-01 |
| APBA3    | -0.61 | 7.30E-01 | -0.68 | 7.50E-01 | -0.60 | 7.26E-01 |
| C9orf64  | -0.61 | 7.31E-01 | -0.32 | 6.27E-01 | 1.62  | 5.31E-02 |
| NELL2    | -0.61 | 7.31E-01 | -1.52 | 9.36E-01 | 0.00  | 4.99E-01 |
| SNX11    | -0.61 | 7.31E-01 | 0.90  | 1.85E-01 | 1.46  | 7.26E-02 |
| UBE2K    | -0.61 | 7.31E-01 | 0.13  | 4.50E-01 | -0.68 | 7.52E-01 |
| LRRRC63  | -0.61 | 7.31E-01 | -0.29 | 6.14E-01 | -0.86 | 8.05E-01 |
| MT1A     | -0.61 | 7.31E-01 | 0.54  | 2.94E-01 | -0.68 | 7.51E-01 |
| LSM10    | -0.61 | 7.31E-01 | 0.08  | 4.68E-01 | -0.93 | 8.23E-01 |
| MRPL35   | -0.61 | 7.31E-01 | -1.31 | 9.04E-01 | 0.07  | 4.74E-01 |
| PAX3     | -0.61 | 7.31E-01 | -0.49 | 6.88E-01 | 0.55  | 2.90E-01 |
| ZNF256   | -0.61 | 7.31E-01 | 0.51  | 3.03E-01 | -0.54 | 7.05E-01 |
| TAPBP    | -0.62 | 7.31E-01 | 0.31  | 3.78E-01 | -0.56 | 7.12E-01 |
| KRI1     | -0.62 | 7.31E-01 | -1.02 | 8.46E-01 | 0.39  | 3.49E-01 |
| ANAPC16  | -0.62 | 7.31E-01 | 0.74  | 2.29E-01 | 0.16  | 4.37E-01 |
| CATSPERB | -0.62 | 7.31E-01 | -0.34 | 6.33E-01 | -0.50 | 6.92E-01 |
| FAM150A  | -0.62 | 7.31E-01 | -0.61 | 7.30E-01 | -1.10 | 8.64E-01 |
| IFNE     | -0.62 | 7.31E-01 | 0.28  | 3.90E-01 | -0.76 | 7.78E-01 |
| SUV39H2  | -0.62 | 7.31E-01 | -1.25 | 8.95E-01 | 0.03  | 4.88E-01 |
| PRRT2    | -0.62 | 7.31E-01 | -0.72 | 7.64E-01 | -0.69 | 7.53E-01 |
| UQCRC1   | -0.62 | 7.31E-01 | 0.03  | 4.87E-01 | 0.97  | 1.67E-01 |
| ANKRD32  | -0.62 | 7.31E-01 | -1.70 | 9.56E-01 | 0.03  | 4.90E-01 |
| RBBP6    | -0.62 | 7.31E-01 | -1.00 | 8.42E-01 | -0.65 | 7.42E-01 |
| UROD     | -0.62 | 7.31E-01 | 0.24  | 4.07E-01 | -0.07 | 5.29E-01 |

|                 |       |          |       |          |       |          |
|-----------------|-------|----------|-------|----------|-------|----------|
| CTD-2228K2.5    | -0.62 | 7.31E-01 | 0.18  | 4.29E-01 | -1.72 | 9.57E-01 |
| VWA2            | -0.62 | 7.31E-01 | 0.02  | 4.93E-01 | -0.32 | 6.26E-01 |
| EIF4EBP1        | -0.62 | 7.31E-01 | 0.08  | 4.67E-01 | 1.07  | 1.42E-01 |
| SP2             | -0.62 | 7.31E-01 | -0.66 | 7.46E-01 | -0.39 | 6.52E-01 |
| CAMKK1          | -0.62 | 7.31E-01 | 0.26  | 3.96E-01 | 0.83  | 2.03E-01 |
| GDAP2           | -0.62 | 7.31E-01 | -0.36 | 6.40E-01 | -1.49 | 9.32E-01 |
| ZNF862          | -0.62 | 7.31E-01 | -0.98 | 8.36E-01 | 0.37  | 3.56E-01 |
| ZNF320          | -0.62 | 7.32E-01 | 0.26  | 3.96E-01 | -0.92 | 8.22E-01 |
| ZC3H6           | -0.62 | 7.32E-01 | -1.52 | 9.35E-01 | -0.50 | 6.91E-01 |
| TXNDC2          | -0.62 | 7.32E-01 | -1.27 | 8.98E-01 | -0.26 | 6.04E-01 |
| SLC25A19        | -0.62 | 7.32E-01 | 1.39  | 8.24E-02 | 0.26  | 3.99E-01 |
| SLU7            | -0.62 | 7.32E-01 | -0.28 | 6.09E-01 | -0.70 | 7.57E-01 |
| RPL23           | -0.62 | 7.32E-01 | -0.96 | 8.31E-01 | -0.50 | 6.90E-01 |
| CHD2            | -0.62 | 7.32E-01 | 0.31  | 3.78E-01 | -1.40 | 9.20E-01 |
| FAM110B         | -0.62 | 7.32E-01 | -0.28 | 6.11E-01 | 0.35  | 3.63E-01 |
| FAM102A         | -0.62 | 7.32E-01 | 0.22  | 4.14E-01 | -1.18 | 8.80E-01 |
| C9orf147        | -0.62 | 7.32E-01 | 0.03  | 4.90E-01 | 0.35  | 3.63E-01 |
| NDUFB8          | -0.62 | 7.32E-01 | -1.08 | 8.59E-01 | -0.46 | 6.77E-01 |
| DBF4            | -0.62 | 7.32E-01 | 0.40  | 3.46E-01 | -1.74 | 9.59E-01 |
| IL7             | -0.62 | 7.32E-01 | -0.53 | 7.03E-01 | -0.57 | 7.17E-01 |
| RP11-133K1.2    | -0.62 | 7.32E-01 | 0.67  | 2.53E-01 | -1.54 | 9.39E-01 |
| TXNRD3NB        | -0.62 | 7.32E-01 | 0.09  | 4.64E-01 | -1.67 | 9.53E-01 |
| C8orf22         | -0.62 | 7.32E-01 | -0.67 | 7.48E-01 | 0.30  | 3.81E-01 |
| MRPS9           | -0.62 | 7.32E-01 | -0.66 | 7.44E-01 | 1.01  | 1.56E-01 |
| CHMP5           | -0.62 | 7.32E-01 | 0.51  | 3.06E-01 | -0.02 | 5.10E-01 |
| SLC10A7         | -0.62 | 7.33E-01 | 0.00  | 5.00E-01 | 0.57  | 2.85E-01 |
| ANKHD1          | -0.62 | 7.33E-01 | -0.53 | 7.03E-01 | -0.30 | 6.19E-01 |
| ANKHD1-EIF4EBP3 | -0.62 | 7.33E-01 | -0.53 | 7.03E-01 | -0.30 | 6.19E-01 |
| POLE2           | -0.62 | 7.33E-01 | -0.72 | 7.65E-01 | -0.32 | 6.27E-01 |
| SNF8            | -0.62 | 7.33E-01 | -0.71 | 7.62E-01 | -1.61 | 9.47E-01 |
| NPM3            | -0.62 | 7.33E-01 | 0.16  | 4.37E-01 | -0.55 | 7.08E-01 |

|          |       |          |       |          |       |          |
|----------|-------|----------|-------|----------|-------|----------|
| ASCL2    | -0.62 | 7.33E-01 | -0.14 | 5.56E-01 | -1.69 | 9.55E-01 |
| AGTPBP1  | -0.62 | 7.33E-01 | 0.24  | 4.06E-01 | -0.70 | 7.59E-01 |
| PER2     | -0.62 | 7.33E-01 | -0.47 | 6.81E-01 | -0.16 | 5.62E-01 |
| TOMM22   | -0.62 | 7.33E-01 | -0.29 | 6.12E-01 | -0.75 | 7.72E-01 |
| NETO2    | -0.62 | 7.33E-01 | -0.01 | 5.05E-01 | -0.87 | 8.07E-01 |
| PTGFR    | -0.62 | 7.33E-01 | 0.15  | 4.40E-01 | -1.40 | 9.19E-01 |
| BAAT     | -0.62 | 7.33E-01 | -0.29 | 6.12E-01 | 1.20  | 1.15E-01 |
| KLRC2    | -0.62 | 7.33E-01 | -0.82 | 7.95E-01 | 0.16  | 4.38E-01 |
| GLT1D1   | -0.62 | 7.33E-01 | -0.23 | 5.89E-01 | -0.37 | 6.43E-01 |
| FAM183A  | -0.62 | 7.33E-01 | 1.09  | 1.37E-01 | -1.32 | 9.07E-01 |
| MYO1E    | -0.62 | 7.33E-01 | -0.10 | 5.38E-01 | -2.69 | 9.96E-01 |
| OR5H6    | -0.62 | 7.33E-01 | -0.70 | 7.59E-01 | -0.88 | 8.11E-01 |
| PRTN3    | -0.62 | 7.33E-01 | -0.35 | 6.38E-01 | -0.57 | 7.15E-01 |
| MFSD7    | -0.62 | 7.33E-01 | -0.55 | 7.08E-01 | -0.09 | 5.36E-01 |
| C19orf54 | -0.62 | 7.33E-01 | -1.14 | 8.74E-01 | -0.31 | 6.23E-01 |
| NPC2     | -0.62 | 7.33E-01 | 1.41  | 7.98E-02 | 2.10  | 1.78E-02 |
| ETS2     | -0.62 | 7.33E-01 | -1.11 | 8.66E-01 | -0.05 | 5.21E-01 |
| CHGB     | -0.62 | 7.33E-01 | 1.03  | 1.51E-01 | 2.20  | 1.38E-02 |
| MON1A    | -0.62 | 7.34E-01 | 0.67  | 2.50E-01 | 0.18  | 4.28E-01 |
| H3F3C    | -0.62 | 7.34E-01 | -0.44 | 6.70E-01 | -0.05 | 5.20E-01 |
| HIP1R    | -0.62 | 7.34E-01 | -0.55 | 7.09E-01 | 0.77  | 2.22E-01 |
| CD200R1  | -0.62 | 7.34E-01 | 0.38  | 3.53E-01 | -0.94 | 8.26E-01 |
| TM4SF1   | -0.62 | 7.34E-01 | 0.08  | 4.67E-01 | -0.38 | 6.46E-01 |
| PSD4     | -0.62 | 7.34E-01 | 0.33  | 3.70E-01 | -0.61 | 7.29E-01 |
| LAMB2    | -0.62 | 7.34E-01 | 0.08  | 4.69E-01 | 0.31  | 3.78E-01 |
| CACNA2D1 | -0.62 | 7.34E-01 | 0.10  | 4.60E-01 | -0.23 | 5.89E-01 |
| PRB4     | -0.62 | 7.34E-01 | 0.79  | 2.16E-01 | -0.56 | 7.13E-01 |
| CYP4B1   | -0.62 | 7.34E-01 | -0.39 | 6.52E-01 | 2.11  | 1.73E-02 |
| SIN3A    | -0.62 | 7.34E-01 | -0.45 | 6.74E-01 | -1.38 | 9.17E-01 |
| FSCN2    | -0.62 | 7.34E-01 | -1.10 | 8.63E-01 | -0.85 | 8.03E-01 |
| RIPK1    | -0.62 | 7.34E-01 | -0.44 | 6.71E-01 | -0.07 | 5.27E-01 |

|           |       |          |       |          |       |          |
|-----------|-------|----------|-------|----------|-------|----------|
| SH3GL2    | -0.63 | 7.34E-01 | -1.25 | 8.95E-01 | -0.23 | 5.90E-01 |
| HERC4     | -0.63 | 7.34E-01 | -0.50 | 6.90E-01 | -0.40 | 6.56E-01 |
| CIT       | -0.63 | 7.34E-01 | 1.00  | 1.58E-01 | 0.33  | 3.71E-01 |
| MRGPRF    | -0.63 | 7.34E-01 | -1.55 | 9.40E-01 | 0.79  | 2.14E-01 |
| HEATR5B   | -0.63 | 7.34E-01 | 0.24  | 4.06E-01 | 0.57  | 2.83E-01 |
| NSL1      | -0.63 | 7.34E-01 | -0.32 | 6.24E-01 | 0.58  | 2.80E-01 |
| SH3BP1    | -0.63 | 7.34E-01 | -1.22 | 8.88E-01 | -0.68 | 7.50E-01 |
| OR6B3     | -0.63 | 7.34E-01 | 0.02  | 4.92E-01 | -0.64 | 7.39E-01 |
| FAM96A    | -0.63 | 7.34E-01 | -1.25 | 8.95E-01 | 0.48  | 3.15E-01 |
| SAMD3     | -0.63 | 7.34E-01 | 0.21  | 4.18E-01 | -0.58 | 7.20E-01 |
| DISP2     | -0.63 | 7.34E-01 | 0.73  | 2.33E-01 | -0.55 | 7.08E-01 |
| CLTC      | -0.63 | 7.34E-01 | -1.66 | 9.51E-01 | -0.08 | 5.31E-01 |
| COPG2     | -0.63 | 7.34E-01 | -0.77 | 7.79E-01 | -0.38 | 6.50E-01 |
| SLC17A9   | -0.63 | 7.34E-01 | 0.82  | 2.07E-01 | 0.18  | 4.30E-01 |
| TPPP      | -0.63 | 7.35E-01 | -1.03 | 8.48E-01 | -0.38 | 6.48E-01 |
| LILRA5    | -0.63 | 7.35E-01 | -0.71 | 7.62E-01 | -0.81 | 7.91E-01 |
| ADCY3     | -0.63 | 7.35E-01 | 0.38  | 3.51E-01 | -0.72 | 7.63E-01 |
| SYBU      | -0.63 | 7.35E-01 | -1.34 | 9.10E-01 | 0.74  | 2.30E-01 |
| PICALM    | -0.63 | 7.35E-01 | -0.53 | 7.02E-01 | -0.49 | 6.87E-01 |
| GPR126    | -0.63 | 7.35E-01 | -0.09 | 5.37E-01 | 0.08  | 4.68E-01 |
| GDF10     | -0.63 | 7.35E-01 | -0.73 | 7.68E-01 | 1.35  | 8.79E-02 |
| TMEM61    | -0.63 | 7.35E-01 | -0.80 | 7.88E-01 | -0.56 | 7.12E-01 |
| TMEM205   | -0.63 | 7.35E-01 | -0.01 | 5.06E-01 | -0.73 | 7.68E-01 |
| DNAJC14   | -0.63 | 7.35E-01 | -0.45 | 6.73E-01 | -1.49 | 9.31E-01 |
| MYO9B     | -0.63 | 7.35E-01 | -0.67 | 7.49E-01 | -0.51 | 6.96E-01 |
| SGK1      | -0.63 | 7.35E-01 | -0.62 | 7.32E-01 | 0.53  | 2.97E-01 |
| TEX19     | -0.63 | 7.35E-01 | -0.87 | 8.09E-01 | -0.14 | 5.54E-01 |
| C11orf24  | -0.63 | 7.35E-01 | 0.59  | 2.76E-01 | -0.13 | 5.52E-01 |
| DHX40     | -0.63 | 7.35E-01 | -0.87 | 8.07E-01 | 0.01  | 4.97E-01 |
| KRTAP26-1 | -0.63 | 7.35E-01 | -1.06 | 8.56E-01 | -0.69 | 7.55E-01 |
| LDLRAP1   | -0.63 | 7.35E-01 | 0.27  | 3.92E-01 | -0.69 | 7.56E-01 |



|         |       |          |       |          |       |          |
|---------|-------|----------|-------|----------|-------|----------|
| GTF2A1  | -0.63 | 7.35E-01 | 2.56  | 5.24E-03 | 1.17  | 1.21E-01 |
| ABHD11  | -0.63 | 7.35E-01 | -0.18 | 5.72E-01 | -0.23 | 5.91E-01 |
| GTPBP1  | -0.63 | 7.36E-01 | 0.39  | 3.48E-01 | -0.72 | 7.64E-01 |
| UBTD1   | -0.63 | 7.36E-01 | -0.15 | 5.60E-01 | -0.09 | 5.35E-01 |
| ADRA1B  | -0.63 | 7.36E-01 | 0.69  | 2.45E-01 | -0.16 | 5.63E-01 |
| TAOK2   | -0.63 | 7.36E-01 | -0.88 | 8.11E-01 | -0.97 | 8.34E-01 |
| LRRC8A  | -0.63 | 7.36E-01 | -0.88 | 8.11E-01 | 0.63  | 2.65E-01 |
| FAM150B | -0.63 | 7.36E-01 | -0.72 | 7.64E-01 | -0.67 | 7.47E-01 |
| HRC     | -0.63 | 7.36E-01 | -0.37 | 6.45E-01 | 0.55  | 2.91E-01 |
| CHRNA7  | -0.63 | 7.36E-01 | -0.14 | 5.57E-01 | -0.71 | 7.61E-01 |
| OR13G1  | -0.63 | 7.36E-01 | -0.82 | 7.95E-01 | -0.23 | 5.92E-01 |
| ANAPC5  | -0.63 | 7.36E-01 | -1.29 | 9.02E-01 | -0.35 | 6.36E-01 |
| CD300LB | -0.63 | 7.36E-01 | 0.32  | 3.74E-01 | 0.57  | 2.83E-01 |
| SH3BP5  | -0.63 | 7.36E-01 | -1.99 | 9.77E-01 | 1.15  | 1.25E-01 |
| SPAG8   | -0.63 | 7.36E-01 | -1.83 | 9.66E-01 | -0.37 | 6.43E-01 |
| BBS2    | -0.63 | 7.36E-01 | -1.12 | 8.69E-01 | 1.11  | 1.33E-01 |
| SH3GL1  | -0.63 | 7.36E-01 | -0.10 | 5.41E-01 | -1.22 | 8.89E-01 |
| SMNDC1  | -0.63 | 7.37E-01 | 0.23  | 4.08E-01 | -1.31 | 9.06E-01 |
| UBE2W   | -0.63 | 7.37E-01 | -0.55 | 7.09E-01 | -1.55 | 9.40E-01 |
| FAM120A | -0.63 | 7.37E-01 | 0.57  | 2.86E-01 | 1.13  | 1.29E-01 |
| LBX2    | -0.63 | 7.37E-01 | -0.65 | 7.42E-01 | -0.57 | 7.17E-01 |
| UBR2    | -0.63 | 7.37E-01 | -0.67 | 7.50E-01 | -0.48 | 6.85E-01 |
| ZNRF2   | -0.63 | 7.37E-01 | -0.63 | 7.35E-01 | 0.71  | 2.40E-01 |
| VAMP4   | -0.63 | 7.37E-01 | 0.49  | 3.13E-01 | -0.97 | 8.35E-01 |
| SLC7A5  | -0.63 | 7.37E-01 | -0.75 | 7.75E-01 | -0.76 | 7.76E-01 |
| SCPEP1  | -0.63 | 7.37E-01 | -1.50 | 9.34E-01 | 0.45  | 3.27E-01 |
| APCS    | -0.63 | 7.37E-01 | -0.79 | 7.85E-01 | 0.13  | 4.50E-01 |
| PATE3   | -0.63 | 7.37E-01 | -0.51 | 6.96E-01 | -1.28 | 9.00E-01 |
| PTPRU   | -0.63 | 7.37E-01 | -0.39 | 6.53E-01 | -0.73 | 7.67E-01 |
| CDH17   | -0.63 | 7.37E-01 | -0.88 | 8.11E-01 | -0.59 | 7.21E-01 |
| OPN4    | -0.63 | 7.37E-01 | 0.49  | 3.12E-01 | -1.59 | 9.44E-01 |

|           |       |          |       |          |       |          |
|-----------|-------|----------|-------|----------|-------|----------|
| CDO1      | -0.63 | 7.37E-01 | 0.23  | 4.10E-01 | -0.66 | 7.44E-01 |
| SLC22A9   | -0.63 | 7.37E-01 | 0.27  | 3.95E-01 | -0.56 | 7.13E-01 |
| SCRG1     | -0.63 | 7.37E-01 | -0.28 | 6.10E-01 | -0.64 | 7.40E-01 |
| IFNA21    | -0.63 | 7.37E-01 | -0.44 | 6.69E-01 | -2.15 | 9.84E-01 |
| VAV1      | -0.63 | 7.37E-01 | -0.66 | 7.44E-01 | -0.48 | 6.83E-01 |
| CDC6      | -0.64 | 7.37E-01 | -0.65 | 7.41E-01 | -0.83 | 7.97E-01 |
| CBX2      | -0.64 | 7.37E-01 | -2.06 | 9.80E-01 | -0.23 | 5.90E-01 |
| MAP9      | -0.64 | 7.37E-01 | -1.01 | 8.43E-01 | -0.40 | 6.57E-01 |
| STARD3NL  | -0.64 | 7.37E-01 | -1.07 | 8.58E-01 | -0.34 | 6.32E-01 |
| WDR35     | -0.64 | 7.37E-01 | -0.82 | 7.94E-01 | -0.36 | 6.40E-01 |
| HRASLS2   | -0.64 | 7.37E-01 | -0.14 | 5.58E-01 | -1.79 | 9.63E-01 |
| NDUFB8    | -0.64 | 7.38E-01 | -1.12 | 8.69E-01 | -0.45 | 6.73E-01 |
| CD58      | -0.64 | 7.38E-01 | -0.43 | 6.65E-01 | 0.10  | 4.60E-01 |
| KIF11     | -0.64 | 7.38E-01 | 0.49  | 3.12E-01 | -0.56 | 7.14E-01 |
| OR1N2     | -0.64 | 7.38E-01 | -0.17 | 5.66E-01 | -0.34 | 6.31E-01 |
| DUSP19    | -0.64 | 7.38E-01 | -0.87 | 8.07E-01 | -0.20 | 5.80E-01 |
| TMEM151B  | -0.64 | 7.38E-01 | -0.63 | 7.36E-01 | -2.10 | 9.82E-01 |
| LY6E      | -0.64 | 7.38E-01 | 0.02  | 4.93E-01 | -0.25 | 6.00E-01 |
| ABCE1     | -0.64 | 7.38E-01 | 0.13  | 4.50E-01 | -0.44 | 6.71E-01 |
| CELSR1    | -0.64 | 7.38E-01 | -1.84 | 9.67E-01 | 0.28  | 3.91E-01 |
| LPPR1     | -0.64 | 7.38E-01 | 0.14  | 4.43E-01 | -1.48 | 9.31E-01 |
| CPED1     | -0.64 | 7.38E-01 | -0.43 | 6.67E-01 | 0.55  | 2.93E-01 |
| MTRNR2L11 | -0.64 | 7.38E-01 | -0.45 | 6.73E-01 | 0.25  | 4.00E-01 |
| SLC22A3   | -0.64 | 7.38E-01 | 0.43  | 3.34E-01 | 1.30  | 9.69E-02 |
| C4orf27   | -0.64 | 7.38E-01 | -0.61 | 7.27E-01 | 1.59  | 5.62E-02 |
| UACA      | -0.64 | 7.38E-01 | -0.34 | 6.34E-01 | 0.28  | 3.91E-01 |
| LIPT2     | -0.64 | 7.38E-01 | -0.84 | 7.98E-01 | -0.40 | 6.56E-01 |
| TESK1     | -0.64 | 7.38E-01 | -0.98 | 8.37E-01 | -0.93 | 8.24E-01 |
| SLC9A5    | -0.64 | 7.39E-01 | -1.42 | 9.22E-01 | -0.85 | 8.02E-01 |
| ZNF140    | -0.64 | 7.39E-01 | 0.12  | 4.52E-01 | -0.36 | 6.39E-01 |
| FBXO8     | -0.64 | 7.39E-01 | -1.94 | 9.74E-01 | 0.03  | 4.88E-01 |

|          |       |          |       |          |       |          |
|----------|-------|----------|-------|----------|-------|----------|
| SHPK     | -0.64 | 7.39E-01 | 0.23  | 4.09E-01 | 0.06  | 4.77E-01 |
| SPSB1    | -0.64 | 7.39E-01 | -0.18 | 5.72E-01 | -0.14 | 5.54E-01 |
| ZNF134   | -0.64 | 7.39E-01 | -0.32 | 6.25E-01 | -1.50 | 9.33E-01 |
| ANKRD61  | -0.64 | 7.39E-01 | -0.90 | 8.16E-01 | -0.42 | 6.62E-01 |
| CLDN14   | -0.64 | 7.39E-01 | -1.19 | 8.84E-01 | -0.09 | 5.38E-01 |
| CACNG6   | -0.64 | 7.39E-01 | 0.71  | 2.40E-01 | 0.23  | 4.07E-01 |
| WRAP53   | -0.64 | 7.39E-01 | -0.32 | 6.24E-01 | 1.18  | 1.18E-01 |
| NTNG1    | -0.64 | 7.39E-01 | -1.56 | 9.40E-01 | -0.79 | 7.85E-01 |
| CDC42EP1 | -0.64 | 7.39E-01 | -0.65 | 7.43E-01 | -1.16 | 8.77E-01 |
| OXTR     | -0.64 | 7.39E-01 | -0.89 | 8.15E-01 | -0.17 | 5.69E-01 |
| ALG8     | -0.64 | 7.39E-01 | -1.17 | 8.79E-01 | -0.79 | 7.84E-01 |
| CWH43    | -0.64 | 7.39E-01 | 0.39  | 3.48E-01 | -0.02 | 5.08E-01 |
| MORN1    | -0.64 | 7.39E-01 | -1.70 | 9.55E-01 | 0.20  | 4.19E-01 |
| PRR26    | -0.64 | 7.40E-01 | -0.87 | 8.08E-01 | -0.76 | 7.76E-01 |
| RPS29    | -0.64 | 7.40E-01 | -1.17 | 8.80E-01 | -0.30 | 6.16E-01 |
| BCKDHA   | -0.64 | 7.40E-01 | 0.55  | 2.91E-01 | 1.19  | 1.17E-01 |
| MGAT4C   | -0.64 | 7.40E-01 | -1.79 | 9.63E-01 | 0.53  | 2.99E-01 |
| NREP     | -0.64 | 7.40E-01 | -0.77 | 7.81E-01 | -0.42 | 6.64E-01 |
| TMEM145  | -0.64 | 7.40E-01 | -0.89 | 8.14E-01 | -0.22 | 5.89E-01 |
| APOA5    | -0.64 | 7.40E-01 | -0.81 | 7.92E-01 | 0.38  | 3.52E-01 |
| IQCH     | -0.64 | 7.40E-01 | 1.13  | 1.29E-01 | -0.85 | 8.01E-01 |
| DMKN     | -0.64 | 7.40E-01 | -1.28 | 8.99E-01 | 0.79  | 2.13E-01 |
| GALE     | -0.64 | 7.40E-01 | -0.56 | 7.14E-01 | 0.05  | 4.79E-01 |
| TRIM3    | -0.64 | 7.40E-01 | -1.18 | 8.80E-01 | -0.76 | 7.75E-01 |
| TLR3     | -0.64 | 7.40E-01 | -0.30 | 6.16E-01 | -1.38 | 9.17E-01 |
| APRT     | -0.64 | 7.40E-01 | 1.22  | 1.11E-01 | -0.42 | 6.64E-01 |
| KIR3DL2  | -0.64 | 7.40E-01 | 0.61  | 2.70E-01 | -0.31 | 6.20E-01 |
| SUSD2    | -0.64 | 7.40E-01 | -1.34 | 9.09E-01 | -0.10 | 5.42E-01 |
| MRPS14   | -0.64 | 7.40E-01 | 0.35  | 3.63E-01 | 0.26  | 3.96E-01 |
| PLSCR4   | -0.64 | 7.40E-01 | -0.87 | 8.08E-01 | -0.47 | 6.79E-01 |
| LRRC23   | -0.64 | 7.40E-01 | -0.53 | 7.03E-01 | 0.38  | 3.53E-01 |

|          |       |          |       |          |       |          |
|----------|-------|----------|-------|----------|-------|----------|
| CLIC6    | -0.64 | 7.40E-01 | -1.08 | 8.60E-01 | -1.13 | 8.70E-01 |
| SETX     | -0.65 | 7.41E-01 | 0.27  | 3.94E-01 | 1.09  | 1.38E-01 |
| NFKB2    | -0.65 | 7.41E-01 | -0.18 | 5.70E-01 | 0.76  | 2.25E-01 |
| SERPINA3 | -0.65 | 7.41E-01 | -0.12 | 5.47E-01 | -1.27 | 8.98E-01 |
| RBM42    | -0.65 | 7.41E-01 | -0.01 | 5.04E-01 | -0.30 | 6.19E-01 |
| INHBE    | -0.65 | 7.41E-01 | -0.59 | 7.22E-01 | -0.38 | 6.47E-01 |
| MGAT5B   | -0.65 | 7.41E-01 | -1.04 | 8.50E-01 | 0.06  | 4.75E-01 |
| ZNF783   | -0.65 | 7.41E-01 | 1.55  | 6.05E-02 | 0.21  | 4.15E-01 |
| GHRL     | -0.65 | 7.41E-01 | -0.07 | 5.28E-01 | -1.30 | 9.04E-01 |
| TNFSF11  | -0.65 | 7.41E-01 | -0.23 | 5.90E-01 | -1.27 | 8.98E-01 |
| FBLIM1   | -0.65 | 7.41E-01 | -0.28 | 6.12E-01 | 0.07  | 4.71E-01 |
| CMC2     | -0.65 | 7.41E-01 | -1.36 | 9.12E-01 | -0.60 | 7.25E-01 |
| PADI1    | -0.65 | 7.41E-01 | -0.69 | 7.56E-01 | 0.21  | 4.16E-01 |
| BZW1     | -0.65 | 7.41E-01 | 0.21  | 4.16E-01 | -1.41 | 9.21E-01 |
| CNIH1    | -0.65 | 7.41E-01 | 0.46  | 3.21E-01 | -0.99 | 8.40E-01 |
| COL25A1  | -0.65 | 7.41E-01 | 0.50  | 3.08E-01 | -1.85 | 9.68E-01 |
| PARP12   | -0.65 | 7.41E-01 | -0.69 | 7.56E-01 | -0.46 | 6.77E-01 |
| OR51A4   | -0.65 | 7.41E-01 | -0.61 | 7.28E-01 | 1.02  | 1.53E-01 |
| B2M      | -0.65 | 7.41E-01 | -0.79 | 7.86E-01 | -1.24 | 8.92E-01 |
| SLC37A3  | -0.65 | 7.41E-01 | -0.33 | 6.31E-01 | 0.30  | 3.83E-01 |
| FGF3     | -0.65 | 7.41E-01 | -0.15 | 5.61E-01 | 0.20  | 4.22E-01 |
| ZNF454   | -0.65 | 7.42E-01 | 0.42  | 3.36E-01 | 0.90  | 1.83E-01 |
| CASP4    | -0.65 | 7.42E-01 | -0.86 | 8.05E-01 | -1.13 | 8.71E-01 |
| CBX4     | -0.65 | 7.42E-01 | -0.81 | 7.90E-01 | 0.12  | 4.52E-01 |
| EXOC1    | -0.65 | 7.42E-01 | 1.52  | 6.42E-02 | -0.12 | 5.48E-01 |
| ZNF382   | -0.65 | 7.42E-01 | -0.25 | 5.99E-01 | -0.42 | 6.64E-01 |
| CDC42SE2 | -0.65 | 7.42E-01 | -0.13 | 5.52E-01 | -1.57 | 9.42E-01 |
| REG4     | -0.65 | 7.42E-01 | -0.42 | 6.64E-01 | -1.11 | 8.66E-01 |
| C5orf49  | -0.65 | 7.42E-01 | 0.56  | 2.89E-01 | -1.23 | 8.90E-01 |
| PGM3     | -0.65 | 7.42E-01 | 0.89  | 1.86E-01 | 0.39  | 3.48E-01 |
| PDF      | -0.65 | 7.42E-01 | 0.02  | 4.93E-01 | 1.70  | 4.42E-02 |

|         |       |          |       |          |       |          |
|---------|-------|----------|-------|----------|-------|----------|
| MZT1    | -0.65 | 7.42E-01 | -1.02 | 8.45E-01 | 0.18  | 4.28E-01 |
| PABPN1  | -0.65 | 7.42E-01 | -0.65 | 7.42E-01 | -0.26 | 6.04E-01 |
| SIGLEC5 | -0.65 | 7.42E-01 | -0.27 | 6.06E-01 | -1.73 | 9.58E-01 |
| GPR148  | -0.65 | 7.42E-01 | 0.53  | 2.99E-01 | -0.67 | 7.47E-01 |
| OCM2    | -0.65 | 7.42E-01 | -0.34 | 6.35E-01 | 0.02  | 4.91E-01 |
| NODAL   | -0.65 | 7.42E-01 | -0.69 | 7.55E-01 | -0.77 | 7.80E-01 |
| NLRP4   | -0.65 | 7.42E-01 | -0.27 | 6.05E-01 | -0.71 | 7.60E-01 |
| FAM129A | -0.65 | 7.42E-01 | -0.40 | 6.56E-01 | -0.62 | 7.34E-01 |
| SIGLEC8 | -0.65 | 7.42E-01 | 0.19  | 4.24E-01 | -0.93 | 8.23E-01 |
| MSANTD2 | -0.65 | 7.42E-01 | 0.24  | 4.05E-01 | -0.21 | 5.85E-01 |
| CLIP3   | -0.65 | 7.42E-01 | 0.39  | 3.49E-01 | -2.12 | 9.83E-01 |
| ADAM15  | -0.65 | 7.43E-01 | -1.18 | 8.81E-01 | 0.00  | 5.02E-01 |
| PLA2G4A | -0.65 | 7.43E-01 | -0.79 | 7.86E-01 | -1.25 | 8.94E-01 |
| THAP8   | -0.65 | 7.43E-01 | -0.49 | 6.87E-01 | -1.14 | 8.72E-01 |
| NOP9    | -0.65 | 7.43E-01 | -0.54 | 7.05E-01 | -1.04 | 8.50E-01 |
| ZNF324B | -0.65 | 7.43E-01 | -0.18 | 5.70E-01 | -0.53 | 7.03E-01 |
| SHB     | -0.65 | 7.43E-01 | -1.08 | 8.61E-01 | -0.04 | 5.18E-01 |
| XIRP1   | -0.65 | 7.43E-01 | -1.53 | 9.38E-01 | 0.41  | 3.41E-01 |
| VCP     | -0.65 | 7.43E-01 | -1.29 | 9.01E-01 | 0.94  | 1.74E-01 |
| ZBTB8OS | -0.65 | 7.43E-01 | -0.58 | 7.19E-01 | -0.59 | 7.22E-01 |
| ZFP90   | -0.65 | 7.43E-01 | -1.11 | 8.66E-01 | 0.34  | 3.69E-01 |
| KIF9    | -0.65 | 7.43E-01 | -0.34 | 6.34E-01 | 0.45  | 3.26E-01 |
| CHTOP   | -0.65 | 7.43E-01 | -0.62 | 7.31E-01 | 0.34  | 3.65E-01 |
| ZNF566  | -0.65 | 7.43E-01 | -1.06 | 8.55E-01 | -0.48 | 6.86E-01 |
| GPR68   | -0.65 | 7.43E-01 | -1.03 | 8.49E-01 | -1.32 | 9.07E-01 |
| CHST5   | -0.65 | 7.43E-01 | -0.66 | 7.45E-01 | -0.98 | 8.35E-01 |
| GLB1    | -0.65 | 7.43E-01 | -0.87 | 8.07E-01 | -0.31 | 6.22E-01 |
| ATP6V1F | -0.65 | 7.43E-01 | -0.31 | 6.23E-01 | 0.14  | 4.45E-01 |
| PAK6    | -0.65 | 7.43E-01 | 0.64  | 2.60E-01 | -1.57 | 9.41E-01 |
| UFD1L   | -0.65 | 7.43E-01 | -1.37 | 9.14E-01 | -0.59 | 7.23E-01 |
| CLEC14A | -0.65 | 7.44E-01 | 0.49  | 3.13E-01 | 0.15  | 4.39E-01 |

|           |       |          |       |          |       |          |
|-----------|-------|----------|-------|----------|-------|----------|
| TGOLN2    | -0.65 | 7.44E-01 | -0.12 | 5.47E-01 | 0.87  | 1.92E-01 |
| PIGV      | -0.65 | 7.44E-01 | 0.41  | 3.43E-01 | 1.30  | 9.68E-02 |
| SNX25     | -0.66 | 7.44E-01 | -1.16 | 8.77E-01 | -1.36 | 9.13E-01 |
| NUCB1     | -0.66 | 7.44E-01 | -0.71 | 7.61E-01 | -1.62 | 9.47E-01 |
| FAM89A    | -0.66 | 7.44E-01 | -0.85 | 8.04E-01 | 0.94  | 1.73E-01 |
| PSMD11    | -0.66 | 7.44E-01 | 1.17  | 1.22E-01 | 0.02  | 4.92E-01 |
| ASB2      | -0.66 | 7.44E-01 | -0.79 | 7.85E-01 | 0.38  | 3.51E-01 |
| ARMC7     | -0.66 | 7.44E-01 | -0.23 | 5.90E-01 | 0.38  | 3.52E-01 |
| ZNF606    | -0.66 | 7.44E-01 | 0.88  | 1.89E-01 | 0.90  | 1.83E-01 |
| LTBP4     | -0.66 | 7.44E-01 | -1.63 | 9.49E-01 | 0.02  | 4.92E-01 |
| PQLC2     | -0.66 | 7.44E-01 | 0.19  | 4.24E-01 | 0.48  | 3.15E-01 |
| CEA       | -0.66 | 7.44E-01 | -0.19 | 5.76E-01 | -1.20 | 8.85E-01 |
| GOLGA7B   | -0.66 | 7.44E-01 | -1.15 | 8.75E-01 | -0.41 | 6.59E-01 |
| RFWD2     | -0.66 | 7.44E-01 | -0.59 | 7.24E-01 | -1.54 | 9.38E-01 |
| BCAR3     | -0.66 | 7.44E-01 | 1.00  | 1.58E-01 | -0.65 | 7.43E-01 |
| ACKR3     | -0.66 | 7.44E-01 | -1.44 | 9.26E-01 | -0.79 | 7.85E-01 |
| MMS22L    | -0.66 | 7.44E-01 | -0.38 | 6.47E-01 | -1.04 | 8.50E-01 |
| KLRK1     | -0.66 | 7.45E-01 | -0.47 | 6.81E-01 | -0.29 | 6.16E-01 |
| C4orf22   | -0.66 | 7.45E-01 | 0.16  | 4.35E-01 | -0.09 | 5.35E-01 |
| C10orf107 | -0.66 | 7.45E-01 | -0.09 | 5.34E-01 | -0.46 | 6.76E-01 |
| LRRN3     | -0.66 | 7.45E-01 | 0.26  | 3.96E-01 | 0.49  | 3.11E-01 |
| C17orf67  | -0.66 | 7.45E-01 | -2.06 | 9.80E-01 | -0.50 | 6.91E-01 |
| KIAA0247  | -0.66 | 7.45E-01 | 0.01  | 4.96E-01 | -1.02 | 8.47E-01 |
| SIX3      | -0.66 | 7.45E-01 | -0.27 | 6.08E-01 | -1.47 | 9.30E-01 |
| ADCYAP1   | -0.66 | 7.45E-01 | 0.32  | 3.76E-01 | -0.14 | 5.55E-01 |
| RITA1     | -0.66 | 7.45E-01 | -1.01 | 8.43E-01 | -0.50 | 6.90E-01 |
| MRPL40    | -0.66 | 7.45E-01 | 0.24  | 4.03E-01 | -0.69 | 7.55E-01 |
| YEATS2    | -0.66 | 7.45E-01 | 0.06  | 4.76E-01 | 1.36  | 8.66E-02 |
| C16orf78  | -0.66 | 7.45E-01 | 0.19  | 4.24E-01 | 0.45  | 3.28E-01 |
| CNDP2     | -0.66 | 7.45E-01 | 0.75  | 2.28E-01 | -0.92 | 8.20E-01 |
| ZNF429    | -0.66 | 7.45E-01 | -0.55 | 7.09E-01 | -1.95 | 9.75E-01 |

|           |       |          |       |          |       |          |
|-----------|-------|----------|-------|----------|-------|----------|
| BTG3      | -0.66 | 7.45E-01 | -0.51 | 6.95E-01 | 1.23  | 1.09E-01 |
| ASIC5     | -0.66 | 7.45E-01 | -0.60 | 7.26E-01 | -0.82 | 7.93E-01 |
| PDLIM7    | -0.66 | 7.45E-01 | -1.30 | 9.03E-01 | -0.56 | 7.13E-01 |
| KCNJ10    | -0.66 | 7.45E-01 | -1.29 | 9.01E-01 | -0.08 | 5.31E-01 |
| OR8K3     | -0.66 | 7.45E-01 | -0.79 | 7.87E-01 | -1.25 | 8.95E-01 |
| MAPK8     | -0.66 | 7.46E-01 | 0.20  | 4.19E-01 | 1.33  | 9.13E-02 |
| SLC4A1    | -0.66 | 7.46E-01 | -0.18 | 5.72E-01 | -1.35 | 9.12E-01 |
| PRR15     | -0.66 | 7.46E-01 | -2.18 | 9.85E-01 | 0.55  | 2.91E-01 |
| SLC30A4   | -0.66 | 7.46E-01 | -1.15 | 8.75E-01 | -0.48 | 6.86E-01 |
| MYH2      | -0.66 | 7.46E-01 | 0.19  | 4.24E-01 | -1.58 | 9.43E-01 |
| GRIK1     | -0.66 | 7.46E-01 | 0.21  | 4.17E-01 | -1.82 | 9.66E-01 |
| STX5      | -0.66 | 7.46E-01 | -0.79 | 7.84E-01 | -0.11 | 5.44E-01 |
| PCGF1     | -0.66 | 7.46E-01 | -1.52 | 9.36E-01 | -0.54 | 7.06E-01 |
| BRD3      | -0.66 | 7.46E-01 | -0.85 | 8.03E-01 | -0.49 | 6.88E-01 |
| LSS       | -0.66 | 7.46E-01 | -2.01 | 9.78E-01 | 1.10  | 1.35E-01 |
| TMEM170B  | -0.66 | 7.46E-01 | -0.31 | 6.23E-01 | 1.12  | 1.31E-01 |
| KRTAP29-1 | -0.66 | 7.46E-01 | -0.41 | 6.58E-01 | -1.46 | 9.28E-01 |
| ZNF701    | -0.66 | 7.46E-01 | -0.86 | 8.05E-01 | 0.25  | 4.00E-01 |
| ZAP70     | -0.66 | 7.46E-01 | -1.71 | 9.57E-01 | -0.95 | 8.28E-01 |
| CFHR2     | -0.66 | 7.46E-01 | 1.31  | 9.50E-02 | 0.70  | 2.43E-01 |
| MORF4L1   | -0.66 | 7.46E-01 | -0.15 | 5.58E-01 | -0.53 | 7.02E-01 |
| C22orf24  | -0.66 | 7.46E-01 | 0.12  | 4.53E-01 | -0.58 | 7.20E-01 |
| PLCG2     | -0.66 | 7.46E-01 | -1.50 | 9.33E-01 | -0.19 | 5.74E-01 |
| RAMP3     | -0.66 | 7.46E-01 | -0.23 | 5.89E-01 | -0.74 | 7.69E-01 |
| BTBD3     | -0.66 | 7.46E-01 | -0.35 | 6.36E-01 | -0.63 | 7.37E-01 |
| FNBP1     | -0.66 | 7.46E-01 | 0.08  | 4.68E-01 | 1.10  | 1.35E-01 |
| KRT8      | -0.66 | 7.47E-01 | -0.98 | 8.36E-01 | -0.79 | 7.86E-01 |
| COL8A2    | -0.66 | 7.47E-01 | -0.21 | 5.82E-01 | -0.24 | 5.95E-01 |
| LHX5      | -0.66 | 7.47E-01 | 0.55  | 2.91E-01 | -0.90 | 8.15E-01 |
| HENMT1    | -0.66 | 7.47E-01 | -0.20 | 5.81E-01 | -0.95 | 8.29E-01 |
| RALGDS    | -0.66 | 7.47E-01 | -0.46 | 6.75E-01 | -0.70 | 7.58E-01 |

|          |       |          |       |          |       |          |
|----------|-------|----------|-------|----------|-------|----------|
| MYNN     | -0.66 | 7.47E-01 | -0.39 | 6.53E-01 | -0.11 | 5.45E-01 |
| ARMS2    | -0.66 | 7.47E-01 | 0.52  | 3.02E-01 | 0.32  | 3.76E-01 |
| OR6K3    | -0.66 | 7.47E-01 | -1.17 | 8.79E-01 | -0.58 | 7.18E-01 |
| FYB      | -0.66 | 7.47E-01 | -0.45 | 6.75E-01 | -1.80 | 9.64E-01 |
| ZIC1     | -0.66 | 7.47E-01 | -1.67 | 9.52E-01 | -0.31 | 6.23E-01 |
| TIGD1    | -0.66 | 7.47E-01 | -0.95 | 8.30E-01 | 0.12  | 4.52E-01 |
| EHD1     | -0.66 | 7.47E-01 | -2.26 | 9.88E-01 | -0.27 | 6.08E-01 |
| MRVI1    | -0.67 | 7.47E-01 | 0.08  | 4.68E-01 | 0.59  | 2.77E-01 |
| CSAD     | -0.67 | 7.47E-01 | 0.76  | 2.23E-01 | 0.28  | 3.90E-01 |
| KDM5B    | -0.67 | 7.47E-01 | -1.09 | 8.62E-01 | -0.63 | 7.37E-01 |
| EPT1     | -0.67 | 7.47E-01 | 0.07  | 4.71E-01 | -0.68 | 7.52E-01 |
| KRCC1    | -0.67 | 7.47E-01 | 0.30  | 3.81E-01 | -0.68 | 7.51E-01 |
| UGT1A6   | -0.67 | 7.47E-01 | -0.29 | 6.12E-01 | -0.21 | 5.82E-01 |
| HNRNPUL2 | -0.67 | 7.47E-01 | -0.16 | 5.64E-01 | -2.05 | 9.80E-01 |
| MS4A4E   | -0.67 | 7.47E-01 | -1.33 | 9.09E-01 | 0.10  | 4.61E-01 |
| NDUFC2   | -0.67 | 7.47E-01 | -1.15 | 8.76E-01 | -0.69 | 7.55E-01 |
| FEM1C    | -0.67 | 7.47E-01 | 1.23  | 1.10E-01 | -1.32 | 9.07E-01 |
| KRT2     | -0.67 | 7.47E-01 | -0.21 | 5.85E-01 | -1.30 | 9.03E-01 |
| RSPH1    | -0.67 | 7.48E-01 | -0.12 | 5.48E-01 | 0.31  | 3.77E-01 |
| PRCD     | -0.67 | 7.48E-01 | -0.15 | 5.58E-01 | 1.02  | 1.54E-01 |
| VPS33B   | -0.67 | 7.48E-01 | 0.43  | 3.35E-01 | -1.42 | 9.22E-01 |
| ILF2     | -0.67 | 7.48E-01 | -1.16 | 8.77E-01 | -0.14 | 5.55E-01 |
| TBC1D12  | -0.67 | 7.48E-01 | -0.68 | 7.51E-01 | 0.07  | 4.70E-01 |
| PARD6G   | -0.67 | 7.48E-01 | -1.23 | 8.91E-01 | 1.01  | 1.56E-01 |
| OR4C5    | -0.67 | 7.48E-01 | 0.32  | 3.76E-01 | -0.44 | 6.69E-01 |
| SERPINE3 | -0.67 | 7.48E-01 | -0.37 | 6.45E-01 | -0.86 | 8.05E-01 |
| LHFPL2   | -0.67 | 7.48E-01 | -0.91 | 8.18E-01 | 0.47  | 3.19E-01 |
| SAMD14   | -0.67 | 7.48E-01 | -0.07 | 5.26E-01 | -1.48 | 9.30E-01 |
| KPNA4    | -0.67 | 7.48E-01 | -0.21 | 5.84E-01 | -0.88 | 8.10E-01 |
| SLC27A3  | -0.67 | 7.48E-01 | 0.36  | 3.59E-01 | 0.69  | 2.45E-01 |
| CDC45    | -0.67 | 7.48E-01 | -0.89 | 8.13E-01 | -0.94 | 8.27E-01 |



|                |       |          |       |          |       |          |
|----------------|-------|----------|-------|----------|-------|----------|
| KCNK9          | -0.67 | 7.49E-01 | -0.79 | 7.86E-01 | -0.85 | 8.02E-01 |
| ABCD4          | -0.67 | 7.49E-01 | -0.54 | 7.04E-01 | -0.78 | 7.83E-01 |
| AC012313.1     | -0.67 | 7.49E-01 | 0.97  | 1.65E-01 | 0.18  | 4.29E-01 |
| PRCC           | -0.67 | 7.49E-01 | -1.23 | 8.91E-01 | 0.32  | 3.75E-01 |
| SPAG7          | -0.67 | 7.49E-01 | 0.04  | 4.85E-01 | 0.04  | 4.86E-01 |
| CLTCL1         | -0.67 | 7.49E-01 | -0.72 | 7.64E-01 | -0.91 | 8.20E-01 |
| GALNT5         | -0.67 | 7.49E-01 | 0.30  | 3.82E-01 | -0.11 | 5.44E-01 |
| MIEF1          | -0.67 | 7.49E-01 | 0.09  | 4.63E-01 | -0.91 | 8.18E-01 |
| KANSL2         | -0.67 | 7.49E-01 | 0.28  | 3.90E-01 | 1.50  | 6.74E-02 |
| EPAS1          | -0.67 | 7.49E-01 | 0.38  | 3.53E-01 | -0.29 | 6.15E-01 |
| CPB2           | -0.67 | 7.49E-01 | -0.26 | 6.02E-01 | -1.61 | 9.47E-01 |
| SCOC           | -0.67 | 7.49E-01 | -0.46 | 6.77E-01 | -1.42 | 9.23E-01 |
| GMDS           | -0.67 | 7.49E-01 | 1.26  | 1.03E-01 | 0.11  | 4.55E-01 |
| RNF144B        | -0.67 | 7.49E-01 | 0.43  | 3.34E-01 | -0.69 | 7.54E-01 |
| KRT16          | -0.67 | 7.49E-01 | -0.06 | 5.25E-01 | -1.24 | 8.92E-01 |
| HCK            | -0.67 | 7.49E-01 | 1.15  | 1.26E-01 | -0.17 | 5.66E-01 |
| COX17          | -0.67 | 7.49E-01 | 0.58  | 2.81E-01 | -1.15 | 8.76E-01 |
| TMEM110-MUSTN1 | -0.67 | 7.49E-01 | 0.34  | 3.69E-01 | 1.36  | 8.72E-02 |
| GALR1          | -0.67 | 7.49E-01 | 0.30  | 3.82E-01 | -0.96 | 8.31E-01 |
| MMP11          | -0.67 | 7.49E-01 | 1.03  | 1.51E-01 | 0.46  | 3.24E-01 |
| C10orf115      | -0.67 | 7.50E-01 | -0.93 | 8.23E-01 | 0.06  | 4.75E-01 |
| KDM3B          | -0.67 | 7.50E-01 | -0.84 | 8.00E-01 | 1.54  | 6.23E-02 |
| CCNB2          | -0.67 | 7.50E-01 | -0.29 | 6.16E-01 | -1.03 | 8.48E-01 |
| FPGS           | -0.67 | 7.50E-01 | -1.18 | 8.81E-01 | 0.16  | 4.38E-01 |
| MDS2           | -0.67 | 7.50E-01 | 0.48  | 3.15E-01 | -0.05 | 5.19E-01 |
| KRIT1          | -0.67 | 7.50E-01 | -0.94 | 8.27E-01 | -0.56 | 7.11E-01 |
| NR2F1          | -0.67 | 7.50E-01 | -1.04 | 8.51E-01 | 0.04  | 4.84E-01 |
| LRRIQ4         | -0.67 | 7.50E-01 | -0.05 | 5.22E-01 | -0.04 | 5.16E-01 |
| AKAP11         | -0.67 | 7.50E-01 | 0.00  | 5.02E-01 | -0.95 | 8.29E-01 |
| HSF1           | -0.67 | 7.50E-01 | -0.48 | 6.83E-01 | 0.06  | 4.77E-01 |
| STAT1          | -0.67 | 7.50E-01 | 0.37  | 3.57E-01 | -0.81 | 7.92E-01 |

|           |       |          |       |          |       |          |
|-----------|-------|----------|-------|----------|-------|----------|
| PARP15    | -0.67 | 7.50E-01 | -0.63 | 7.36E-01 | -0.93 | 8.25E-01 |
| ZNF277    | -0.68 | 7.50E-01 | -0.21 | 5.85E-01 | -0.03 | 5.12E-01 |
| RAB11FIP3 | -0.68 | 7.50E-01 | -0.89 | 8.14E-01 | -0.45 | 6.75E-01 |
| DUSP26    | -0.68 | 7.50E-01 | -0.48 | 6.85E-01 | 0.20  | 4.20E-01 |
| CST2      | -0.68 | 7.50E-01 | -0.01 | 5.04E-01 | -1.58 | 9.43E-01 |
| AVEN      | -0.68 | 7.50E-01 | 0.43  | 3.34E-01 | -0.84 | 8.00E-01 |
| UGT3A1    | -0.68 | 7.50E-01 | -0.30 | 6.20E-01 | 0.79  | 2.14E-01 |
| ZNF740    | -0.68 | 7.50E-01 | 0.72  | 2.36E-01 | 0.49  | 3.13E-01 |
| WDR83OS   | -0.68 | 7.50E-01 | 0.28  | 3.90E-01 | -1.16 | 8.77E-01 |
| HDAC5     | -0.68 | 7.51E-01 | -0.75 | 7.73E-01 | -1.24 | 8.92E-01 |
| USP32     | -0.68 | 7.51E-01 | 0.76  | 2.24E-01 | -0.15 | 5.61E-01 |
| GPAT2     | -0.68 | 7.51E-01 | -0.87 | 8.07E-01 | -0.22 | 5.88E-01 |
| RGS7BP    | -0.68 | 7.51E-01 | 0.04  | 4.85E-01 | -0.28 | 6.12E-01 |
| ZNF599    | -0.68 | 7.51E-01 | -1.95 | 9.75E-01 | 0.83  | 2.04E-01 |
| PPP3CB    | -0.68 | 7.51E-01 | -1.06 | 8.56E-01 | -0.42 | 6.64E-01 |
| GLIS3     | -0.68 | 7.51E-01 | -0.85 | 8.03E-01 | -0.16 | 5.63E-01 |
| CALCB     | -0.68 | 7.51E-01 | -0.28 | 6.08E-01 | -1.38 | 9.16E-01 |
| ENPP7     | -0.68 | 7.51E-01 | -0.67 | 7.50E-01 | -0.92 | 8.21E-01 |
| HMGB4     | -0.68 | 7.51E-01 | 0.77  | 2.20E-01 | -1.18 | 8.81E-01 |
| RNF175    | -0.68 | 7.52E-01 | -1.10 | 8.65E-01 | 0.41  | 3.42E-01 |
| SGSH      | -0.68 | 7.52E-01 | -0.96 | 8.32E-01 | 0.31  | 3.77E-01 |
| TMEM169   | -0.68 | 7.52E-01 | -0.59 | 7.22E-01 | 0.77  | 2.20E-01 |
| LILRB4    | -0.68 | 7.52E-01 | -1.26 | 8.97E-01 | 0.18  | 4.27E-01 |
| C11orf65  | -0.68 | 7.52E-01 | -0.58 | 7.18E-01 | -0.29 | 6.16E-01 |
| KRTAP27-1 | -0.68 | 7.52E-01 | -1.03 | 8.49E-01 | -0.57 | 7.17E-01 |
| ZNF567    | -0.68 | 7.52E-01 | 0.01  | 4.95E-01 | -0.02 | 5.07E-01 |
| FAM64A    | -0.68 | 7.52E-01 | -0.56 | 7.13E-01 | -0.62 | 7.33E-01 |
| DPP6      | -0.68 | 7.52E-01 | -0.04 | 5.18E-01 | -0.20 | 5.80E-01 |
| PTPN3     | -0.68 | 7.52E-01 | 0.01  | 4.97E-01 | 1.15  | 1.25E-01 |
| LIFR      | -0.68 | 7.52E-01 | -0.46 | 6.77E-01 | -0.33 | 6.31E-01 |
| CEP63     | -0.68 | 7.53E-01 | -0.52 | 7.00E-01 | -0.92 | 8.22E-01 |

|            |       |          |       |          |       |          |
|------------|-------|----------|-------|----------|-------|----------|
| MRPL50     | -0.68 | 7.53E-01 | -0.32 | 6.27E-01 | 0.71  | 2.39E-01 |
| PLEKHA5    | -0.68 | 7.53E-01 | -0.46 | 6.76E-01 | 0.61  | 2.73E-01 |
| TAF3       | -0.68 | 7.53E-01 | 0.41  | 3.40E-01 | -2.57 | 9.95E-01 |
| BRAP       | -0.68 | 7.53E-01 | -1.23 | 8.91E-01 | -0.16 | 5.65E-01 |
| FMO5       | -0.68 | 7.53E-01 | 0.71  | 2.40E-01 | 1.76  | 3.96E-02 |
| SMAP1      | -0.68 | 7.53E-01 | -0.09 | 5.37E-01 | -0.11 | 5.43E-01 |
| MYH4       | -0.68 | 7.53E-01 | -0.09 | 5.34E-01 | -2.45 | 9.93E-01 |
| AC074212.3 | -0.68 | 7.53E-01 | -0.05 | 5.20E-01 | 0.38  | 3.51E-01 |
| LAMA5      | -0.69 | 7.54E-01 | -0.01 | 5.06E-01 | -1.36 | 9.13E-01 |
| HM13       | -0.69 | 7.54E-01 | -0.42 | 6.63E-01 | -0.10 | 5.41E-01 |
| BRD9       | -0.69 | 7.54E-01 | -0.66 | 7.45E-01 | -0.85 | 8.03E-01 |
| MGAT1      | -0.69 | 7.54E-01 | 0.24  | 4.06E-01 | 0.18  | 4.28E-01 |
| PML        | -0.69 | 7.54E-01 | -1.34 | 9.09E-01 | 0.22  | 4.14E-01 |
| COL6A6     | -0.69 | 7.54E-01 | 0.16  | 4.37E-01 | -0.74 | 7.71E-01 |
| CCDC71L    | -0.69 | 7.54E-01 | 0.37  | 3.55E-01 | -0.22 | 5.87E-01 |
| ABCA1      | -0.69 | 7.54E-01 | 0.41  | 3.39E-01 | 0.48  | 3.17E-01 |
| TMEM163    | -0.69 | 7.54E-01 | -0.01 | 5.06E-01 | -0.83 | 7.97E-01 |
| SLCO2A1    | -0.69 | 7.54E-01 | -0.69 | 7.56E-01 | -0.39 | 6.52E-01 |
| GCNT6      | -0.69 | 7.54E-01 | -0.96 | 8.32E-01 | -1.12 | 8.69E-01 |
| RDH8       | -0.69 | 7.54E-01 | 1.61  | 5.40E-02 | 0.42  | 3.37E-01 |
| CD48       | -0.69 | 7.54E-01 | 0.25  | 4.00E-01 | -0.50 | 6.91E-01 |
| XRCC6      | -0.69 | 7.54E-01 | -0.12 | 5.47E-01 | -0.70 | 7.57E-01 |
| PEX14      | -0.69 | 7.54E-01 | 1.46  | 7.27E-02 | 0.43  | 3.34E-01 |
| DR1        | -0.69 | 7.54E-01 | 0.51  | 3.06E-01 | 0.95  | 1.70E-01 |
| PDE6C      | -0.69 | 7.54E-01 | -0.17 | 5.68E-01 | 1.10  | 1.36E-01 |
| TSPAN9     | -0.69 | 7.54E-01 | -0.35 | 6.36E-01 | 0.06  | 4.78E-01 |
| ANXA7      | -0.69 | 7.54E-01 | -1.37 | 9.15E-01 | -0.23 | 5.89E-01 |
| RAN        | -0.69 | 7.54E-01 | 0.31  | 3.77E-01 | -0.36 | 6.41E-01 |
| HNRNPM     | -0.69 | 7.55E-01 | -1.95 | 9.74E-01 | 0.20  | 4.21E-01 |
| TOB1       | -0.69 | 7.55E-01 | -0.19 | 5.77E-01 | -1.58 | 9.43E-01 |
| PIP5KL1    | -0.69 | 7.55E-01 | -0.89 | 8.14E-01 | -1.15 | 8.75E-01 |

|          |       |          |       |          |       |          |
|----------|-------|----------|-------|----------|-------|----------|
| YWHAB    | -0.69 | 7.55E-01 | -1.64 | 9.50E-01 | -0.46 | 6.76E-01 |
| SLC39A2  | -0.69 | 7.55E-01 | -1.16 | 8.78E-01 | -1.25 | 8.94E-01 |
| RAD21    | -0.69 | 7.55E-01 | -0.64 | 7.39E-01 | 1.07  | 1.41E-01 |
| DPM2     | -0.69 | 7.55E-01 | -0.60 | 7.26E-01 | -0.20 | 5.81E-01 |
| PPME1    | -0.69 | 7.55E-01 | -0.67 | 7.48E-01 | -1.12 | 8.69E-01 |
| RPL3     | -0.69 | 7.55E-01 | -0.63 | 7.35E-01 | -0.67 | 7.47E-01 |
| C1orf227 | -0.69 | 7.55E-01 | -1.17 | 8.80E-01 | 0.31  | 3.79E-01 |
| RFFL     | -0.69 | 7.55E-01 | -0.48 | 6.83E-01 | -0.12 | 5.50E-01 |
| PANK3    | -0.69 | 7.55E-01 | -0.97 | 8.34E-01 | -0.99 | 8.38E-01 |
| CCDC159  | -0.69 | 7.55E-01 | 0.24  | 4.05E-01 | -0.93 | 8.23E-01 |
| MRPL38   | -0.69 | 7.55E-01 | -0.77 | 7.80E-01 | 0.27  | 3.94E-01 |
| ZBTB46   | -0.69 | 7.55E-01 | -0.07 | 5.30E-01 | -0.07 | 5.28E-01 |
| RSBN1    | -0.69 | 7.55E-01 | -0.55 | 7.09E-01 | -1.53 | 9.37E-01 |
| LRRC66   | -0.69 | 7.55E-01 | 0.68  | 2.48E-01 | -1.34 | 9.11E-01 |
| SLC15A2  | -0.69 | 7.56E-01 | -0.59 | 7.22E-01 | -0.74 | 7.71E-01 |
| ACADSB   | -0.69 | 7.56E-01 | -0.50 | 6.92E-01 | 1.27  | 1.02E-01 |
| MEI1     | -0.69 | 7.56E-01 | 0.36  | 3.59E-01 | -1.03 | 8.48E-01 |
| MGMT     | -0.69 | 7.56E-01 | 0.13  | 4.48E-01 | 0.06  | 4.75E-01 |
| TDRD6    | -0.69 | 7.56E-01 | 0.24  | 4.06E-01 | -0.62 | 7.32E-01 |
| OR56A3   | -0.69 | 7.56E-01 | -0.63 | 7.35E-01 | -1.66 | 9.51E-01 |
| SPHK1    | -0.69 | 7.56E-01 | -0.75 | 7.74E-01 | -0.13 | 5.52E-01 |
| DDX5     | -0.69 | 7.56E-01 | 1.26  | 1.04E-01 | 0.22  | 4.13E-01 |
| PTGER3   | -0.69 | 7.56E-01 | 0.63  | 2.64E-01 | 0.30  | 3.80E-01 |
| AGTR1    | -0.69 | 7.56E-01 | 0.37  | 3.56E-01 | -0.07 | 5.28E-01 |
| ANKRD53  | -0.69 | 7.56E-01 | 0.05  | 4.79E-01 | -1.10 | 8.63E-01 |
| TRIM62   | -0.69 | 7.56E-01 | -0.08 | 5.30E-01 | 0.66  | 2.55E-01 |
| CORO1C   | -0.69 | 7.56E-01 | -0.88 | 8.10E-01 | -0.41 | 6.58E-01 |
| FANCD2OS | -0.69 | 7.56E-01 | -0.59 | 7.22E-01 | -0.62 | 7.31E-01 |
| KIAA1432 | -0.69 | 7.56E-01 | -0.30 | 6.18E-01 | 0.18  | 4.30E-01 |
| SNX20    | -0.69 | 7.56E-01 | -1.79 | 9.64E-01 | -0.19 | 5.76E-01 |
| CERS5    | -0.69 | 7.56E-01 | -0.92 | 8.22E-01 | 1.12  | 1.32E-01 |

|          |       |          |       |          |       |          |
|----------|-------|----------|-------|----------|-------|----------|
| SLC6A17  | -0.69 | 7.56E-01 | 0.40  | 3.44E-01 | -0.16 | 5.62E-01 |
| NLRP6    | -0.69 | 7.56E-01 | -0.94 | 8.26E-01 | -0.91 | 8.19E-01 |
| USF2     | -0.69 | 7.56E-01 | -0.26 | 6.02E-01 | -0.96 | 8.32E-01 |
| ZNF415   | -0.69 | 7.56E-01 | -1.21 | 8.87E-01 | -0.24 | 5.95E-01 |
| OAS2     | -0.69 | 7.56E-01 | 0.46  | 3.22E-01 | -0.89 | 8.14E-01 |
| OR5L1    | -0.70 | 7.57E-01 | 0.00  | 5.01E-01 | -0.84 | 8.01E-01 |
| CENPM    | -0.70 | 7.57E-01 | 0.90  | 1.85E-01 | 0.75  | 2.27E-01 |
| CCNI     | -0.70 | 7.57E-01 | 0.51  | 3.03E-01 | -0.62 | 7.33E-01 |
| COLEC10  | -0.70 | 7.57E-01 | -1.26 | 8.96E-01 | 0.42  | 3.38E-01 |
| TK1      | -0.70 | 7.57E-01 | 0.94  | 1.74E-01 | -0.69 | 7.56E-01 |
| MICU1    | -0.70 | 7.57E-01 | 0.99  | 1.62E-01 | 0.40  | 3.44E-01 |
| PSMG3    | -0.70 | 7.57E-01 | 0.16  | 4.35E-01 | -0.95 | 8.30E-01 |
| ARHGEF25 | -0.70 | 7.57E-01 | -1.11 | 8.67E-01 | -1.08 | 8.59E-01 |
| PRKRA    | -0.70 | 7.57E-01 | -0.08 | 5.31E-01 | -0.78 | 7.83E-01 |
| FRS3     | -0.70 | 7.57E-01 | -0.44 | 6.70E-01 | -2.05 | 9.80E-01 |
| ALMS1    | -0.70 | 7.57E-01 | -0.56 | 7.11E-01 | -1.56 | 9.40E-01 |
| COPS3    | -0.70 | 7.57E-01 | -0.40 | 6.55E-01 | -0.26 | 6.03E-01 |
| RAB6A    | -0.70 | 7.57E-01 | 0.56  | 2.89E-01 | 0.74  | 2.30E-01 |
| PVRL1    | -0.70 | 7.57E-01 | -0.02 | 5.09E-01 | 0.09  | 4.65E-01 |
| TWSG1    | -0.70 | 7.57E-01 | -1.02 | 8.47E-01 | -0.59 | 7.21E-01 |
| TTLL8    | -0.70 | 7.58E-01 | 0.42  | 3.37E-01 | -1.31 | 9.06E-01 |
| TUBB1    | -0.70 | 7.58E-01 | -1.59 | 9.44E-01 | 0.60  | 2.75E-01 |
| SH3BP4   | -0.70 | 7.58E-01 | 1.18  | 1.20E-01 | -0.39 | 6.53E-01 |
| PIK3CA   | -0.70 | 7.58E-01 | -0.39 | 6.53E-01 | -0.50 | 6.93E-01 |
| ARMC10   | -0.70 | 7.58E-01 | -1.11 | 8.67E-01 | -0.17 | 5.67E-01 |
| CCDC117  | -0.70 | 7.58E-01 | 0.43  | 3.35E-01 | 0.99  | 1.62E-01 |
| CMPK2    | -0.70 | 7.58E-01 | 0.14  | 4.45E-01 | -0.85 | 8.03E-01 |
| PELO     | -0.70 | 7.58E-01 | -0.89 | 8.13E-01 | 0.93  | 1.75E-01 |
| KIAA0087 | -0.70 | 7.58E-01 | 0.89  | 1.87E-01 | -0.57 | 7.15E-01 |
| FAM78B   | -0.70 | 7.58E-01 | 0.17  | 4.33E-01 | 0.58  | 2.82E-01 |
| SGK494   | -0.70 | 7.58E-01 | -1.81 | 9.65E-01 | 0.17  | 4.33E-01 |

|          |       |          |       |          |       |          |
|----------|-------|----------|-------|----------|-------|----------|
| SLC27A5  | -0.70 | 7.58E-01 | -0.97 | 8.33E-01 | -1.02 | 8.47E-01 |
| ARRDC4   | -0.70 | 7.58E-01 | 0.64  | 2.60E-01 | 0.62  | 2.66E-01 |
| CELA2B   | -0.70 | 7.58E-01 | 0.02  | 4.93E-01 | 0.28  | 3.90E-01 |
| GPT2     | -0.70 | 7.58E-01 | 0.52  | 3.02E-01 | -0.98 | 8.37E-01 |
| TFIP11   | -0.70 | 7.58E-01 | 0.11  | 4.56E-01 | 0.32  | 3.76E-01 |
| TSPAN33  | -0.70 | 7.58E-01 | -0.06 | 5.23E-01 | -0.42 | 6.64E-01 |
| PDX1     | -0.70 | 7.58E-01 | -0.36 | 6.42E-01 | -0.45 | 6.73E-01 |
| COIL     | -0.70 | 7.58E-01 | -1.15 | 8.74E-01 | 0.58  | 2.82E-01 |
| KLHL18   | -0.70 | 7.59E-01 | -1.10 | 8.64E-01 | 0.78  | 2.18E-01 |
| ATOH7    | -0.70 | 7.59E-01 | 1.09  | 1.38E-01 | 1.76  | 3.93E-02 |
| CCDC58   | -0.70 | 7.59E-01 | -0.52 | 6.97E-01 | -0.96 | 8.32E-01 |
| FAM83H   | -0.70 | 7.59E-01 | 0.32  | 3.73E-01 | 0.77  | 2.19E-01 |
| CCL28    | -0.70 | 7.59E-01 | -1.20 | 8.84E-01 | -0.74 | 7.69E-01 |
| KDR      | -0.70 | 7.59E-01 | -0.27 | 6.06E-01 | -0.66 | 7.44E-01 |
| ATRAID   | -0.70 | 7.59E-01 | -1.50 | 9.33E-01 | 0.04  | 4.83E-01 |
| CEPT1    | -0.70 | 7.59E-01 | -0.83 | 7.97E-01 | -1.07 | 8.59E-01 |
| ASPA     | -0.70 | 7.59E-01 | 0.42  | 3.37E-01 | 0.02  | 4.92E-01 |
| CUL1     | -0.70 | 7.59E-01 | -0.54 | 7.04E-01 | 1.18  | 1.19E-01 |
| C15orf62 | -0.70 | 7.59E-01 | -0.26 | 6.01E-01 | -1.38 | 9.16E-01 |
| SLITRK6  | -0.70 | 7.59E-01 | 0.30  | 3.83E-01 | -0.71 | 7.61E-01 |
| TGM5     | -0.70 | 7.59E-01 | 0.09  | 4.65E-01 | -1.42 | 9.22E-01 |
| PCBD2    | -0.70 | 7.59E-01 | -1.31 | 9.06E-01 | -0.24 | 5.93E-01 |
| CHD1L    | -0.70 | 7.59E-01 | 1.94  | 2.61E-02 | 0.39  | 3.47E-01 |
| CDKAL1   | -0.70 | 7.59E-01 | -2.32 | 9.90E-01 | 0.01  | 4.95E-01 |
| 43435    | -0.70 | 7.59E-01 | 0.51  | 3.04E-01 | 0.34  | 3.66E-01 |
| CD46     | -0.70 | 7.59E-01 | -0.16 | 5.65E-01 | -1.27 | 8.98E-01 |
| GNA12    | -0.70 | 7.59E-01 | 0.96  | 1.69E-01 | 0.82  | 2.08E-01 |
| GRPEL2   | -0.70 | 7.60E-01 | 0.00  | 4.99E-01 | 0.47  | 3.20E-01 |
| CCDC177  | -0.71 | 7.60E-01 | 0.22  | 4.15E-01 | -0.75 | 7.74E-01 |
| EAF2     | -0.71 | 7.60E-01 | 0.28  | 3.91E-01 | -0.46 | 6.77E-01 |
| PLEKHH3  | -0.71 | 7.60E-01 | -1.12 | 8.69E-01 | -0.96 | 8.32E-01 |

|          |       |          |       |          |       |          |
|----------|-------|----------|-------|----------|-------|----------|
| PITPNC1  | -0.71 | 7.60E-01 | -0.97 | 8.33E-01 | -0.86 | 8.05E-01 |
| C6orf141 | -0.71 | 7.60E-01 | 0.88  | 1.89E-01 | -0.56 | 7.12E-01 |
| RREB1    | -0.71 | 7.60E-01 | -0.72 | 7.64E-01 | -0.67 | 7.47E-01 |
| MPND     | -0.71 | 7.60E-01 | -0.14 | 5.54E-01 | -1.58 | 9.43E-01 |
| FAM25A   | -0.71 | 7.60E-01 | -0.32 | 6.26E-01 | 1.56  | 5.89E-02 |
| BCAN     | -0.71 | 7.60E-01 | 0.73  | 2.34E-01 | 1.24  | 1.08E-01 |
| FRYL     | -0.71 | 7.60E-01 | 0.05  | 4.80E-01 | -0.29 | 6.13E-01 |
| FAM195B  | -0.71 | 7.60E-01 | -0.28 | 6.11E-01 | -1.28 | 9.00E-01 |
| FAM20A   | -0.71 | 7.60E-01 | -0.65 | 7.42E-01 | -0.41 | 6.60E-01 |
| PSMC2    | -0.71 | 7.60E-01 | -0.66 | 7.44E-01 | -0.79 | 7.86E-01 |
| TMEM74   | -0.71 | 7.60E-01 | 0.19  | 4.26E-01 | -0.04 | 5.16E-01 |
| DOLPP1   | -0.71 | 7.60E-01 | -0.80 | 7.89E-01 | -0.54 | 7.05E-01 |
| P4HA3    | -0.71 | 7.60E-01 | -1.58 | 9.43E-01 | 0.13  | 4.49E-01 |
| GMPPA    | -0.71 | 7.60E-01 | -0.94 | 8.26E-01 | 0.43  | 3.32E-01 |
| ENKUR    | -0.71 | 7.60E-01 | 0.12  | 4.54E-01 | 1.60  | 5.43E-02 |
| OR56A4   | -0.71 | 7.60E-01 | 0.16  | 4.38E-01 | 0.77  | 2.21E-01 |
| FAM65A   | -0.71 | 7.61E-01 | -1.50 | 9.33E-01 | -0.07 | 5.27E-01 |
| UBB      | -0.71 | 7.61E-01 | -0.42 | 6.62E-01 | -0.91 | 8.20E-01 |
| SLC26A8  | -0.71 | 7.61E-01 | -0.79 | 7.85E-01 | -1.79 | 9.63E-01 |
| SIGLEC5  | -0.71 | 7.61E-01 | -0.26 | 6.04E-01 | -1.74 | 9.59E-01 |
| NFE2L1   | -0.71 | 7.61E-01 | 0.83  | 2.03E-01 | 1.84  | 3.32E-02 |
| SORBS1   | -0.71 | 7.61E-01 | -0.72 | 7.65E-01 | -0.62 | 7.33E-01 |
| DDX54    | -0.71 | 7.61E-01 | -1.10 | 8.65E-01 | -0.54 | 7.07E-01 |
| SC5D     | -0.71 | 7.61E-01 | -0.42 | 6.61E-01 | 1.74  | 4.07E-02 |
| HABP4    | -0.71 | 7.61E-01 | -0.55 | 7.08E-01 | 0.90  | 1.84E-01 |
| WASF1    | -0.71 | 7.61E-01 | 1.27  | 1.02E-01 | 0.51  | 3.06E-01 |
| SNAI2    | -0.71 | 7.61E-01 | -0.78 | 7.83E-01 | -0.25 | 5.97E-01 |
| C1orf112 | -0.71 | 7.61E-01 | 1.22  | 1.12E-01 | 1.12  | 1.30E-01 |
| SLFNL1   | -0.71 | 7.61E-01 | -0.07 | 5.30E-01 | -1.90 | 9.71E-01 |
| HABP2    | -0.71 | 7.61E-01 | 1.10  | 1.36E-01 | 0.51  | 3.07E-01 |
| MSTO1    | -0.71 | 7.61E-01 | -0.05 | 5.20E-01 | -0.04 | 5.18E-01 |

|               |       |          |       |          |       |          |
|---------------|-------|----------|-------|----------|-------|----------|
| PCNXL2        | -0.71 | 7.61E-01 | -1.10 | 8.64E-01 | -0.33 | 6.31E-01 |
| PSG5          | -0.71 | 7.61E-01 | -1.76 | 9.61E-01 | 0.59  | 2.76E-01 |
| ABCG1         | -0.71 | 7.61E-01 | 0.92  | 1.80E-01 | -1.02 | 8.47E-01 |
| C17orf64      | -0.71 | 7.61E-01 | 0.53  | 2.96E-01 | -0.36 | 6.42E-01 |
| SOAT2         | -0.71 | 7.62E-01 | -0.76 | 7.77E-01 | -0.34 | 6.33E-01 |
| MORC1         | -0.71 | 7.62E-01 | -0.62 | 7.33E-01 | -0.16 | 5.64E-01 |
| IL6ST         | -0.71 | 7.62E-01 | -1.44 | 9.25E-01 | 0.30  | 3.83E-01 |
| ADAM21        | -0.71 | 7.62E-01 | 1.58  | 5.70E-02 | -0.98 | 8.37E-01 |
| SIX2          | -0.71 | 7.62E-01 | 0.60  | 2.75E-01 | -0.72 | 7.65E-01 |
| MDP1          | -0.71 | 7.62E-01 | 0.89  | 1.88E-01 | 0.56  | 2.87E-01 |
| ZBTB7B        | -0.71 | 7.62E-01 | -0.69 | 7.55E-01 | 0.16  | 4.38E-01 |
| SLAMF1        | -0.71 | 7.62E-01 | -0.05 | 5.22E-01 | 0.21  | 4.17E-01 |
| CYP2A13       | -0.71 | 7.62E-01 | -1.18 | 8.81E-01 | -0.93 | 8.25E-01 |
| TDRKH         | -0.71 | 7.62E-01 | 0.14  | 4.42E-01 | -1.23 | 8.90E-01 |
| AQP2          | -0.71 | 7.62E-01 | -0.73 | 7.67E-01 | -0.83 | 7.97E-01 |
| UBXN11        | -0.71 | 7.62E-01 | -1.31 | 9.04E-01 | -0.55 | 7.08E-01 |
| GUCA1B        | -0.71 | 7.62E-01 | -0.68 | 7.51E-01 | -1.26 | 8.95E-01 |
| IPO11         | -0.71 | 7.62E-01 | 0.95  | 1.72E-01 | -0.15 | 5.60E-01 |
| NFRKB         | -0.71 | 7.63E-01 | -0.19 | 5.74E-01 | -0.70 | 7.59E-01 |
| PTMS          | -0.71 | 7.63E-01 | -0.26 | 6.03E-01 | 0.79  | 2.16E-01 |
| BCL2L2-PABPN1 | -0.71 | 7.63E-01 | -0.91 | 8.19E-01 | -0.23 | 5.89E-01 |
| SLC22A25      | -0.71 | 7.63E-01 | 0.71  | 2.38E-01 | 1.12  | 1.31E-01 |
| MCM9          | -0.71 | 7.63E-01 | 0.47  | 3.20E-01 | 1.20  | 1.14E-01 |
| KIAA1109      | -0.71 | 7.63E-01 | -0.55 | 7.09E-01 | 0.71  | 2.40E-01 |
| OSBPL3        | -0.71 | 7.63E-01 | -0.55 | 7.08E-01 | 1.09  | 1.37E-01 |
| GPR20         | -0.71 | 7.63E-01 | -0.29 | 6.14E-01 | -0.46 | 6.77E-01 |
| RAPGEFL1      | -0.72 | 7.63E-01 | -1.27 | 8.98E-01 | -0.69 | 7.54E-01 |
| COQ10A        | -0.72 | 7.63E-01 | -0.18 | 5.70E-01 | 1.30  | 9.73E-02 |
| PLA2G15       | -0.72 | 7.63E-01 | -1.11 | 8.68E-01 | 0.79  | 2.15E-01 |
| ANKH          | -0.72 | 7.63E-01 | -1.00 | 8.42E-01 | -0.48 | 6.83E-01 |
| SPTA1         | -0.72 | 7.63E-01 | 0.94  | 1.75E-01 | -0.66 | 7.45E-01 |



|          |       |          |       |          |       |          |
|----------|-------|----------|-------|----------|-------|----------|
| FLNC     | -0.72 | 7.63E-01 | -1.40 | 9.19E-01 | 0.09  | 4.65E-01 |
| STARD9   | -0.72 | 7.63E-01 | -0.43 | 6.66E-01 | -0.95 | 8.30E-01 |
| CDC20B   | -0.72 | 7.63E-01 | -0.48 | 6.83E-01 | 0.82  | 2.07E-01 |
| GRXCR1   | -0.72 | 7.63E-01 | 0.13  | 4.47E-01 | 0.09  | 4.65E-01 |
| TP53BP2  | -0.72 | 7.63E-01 | 0.16  | 4.38E-01 | -1.51 | 9.35E-01 |
| ZNF551   | -0.72 | 7.63E-01 | -0.11 | 5.44E-01 | -0.47 | 6.81E-01 |
| C2CD4D   | -0.72 | 7.64E-01 | -0.71 | 7.62E-01 | -0.91 | 8.19E-01 |
| ILVBL    | -0.72 | 7.64E-01 | -0.12 | 5.48E-01 | -1.65 | 9.51E-01 |
| IL20RA   | -0.72 | 7.64E-01 | -1.19 | 8.83E-01 | -0.97 | 8.35E-01 |
| FOXI1    | -0.72 | 7.64E-01 | -1.03 | 8.48E-01 | 0.09  | 4.65E-01 |
| SCGB2B2  | -0.72 | 7.64E-01 | -0.52 | 6.99E-01 | -0.54 | 7.07E-01 |
| LANCL1   | -0.72 | 7.64E-01 | -0.51 | 6.96E-01 | -0.28 | 6.09E-01 |
| GRWD1    | -0.72 | 7.64E-01 | -0.17 | 5.68E-01 | 1.06  | 1.44E-01 |
| SELL     | -0.72 | 7.64E-01 | 0.16  | 4.35E-01 | 0.48  | 3.16E-01 |
| CHRN4    | -0.72 | 7.64E-01 | 0.79  | 2.14E-01 | -0.01 | 5.05E-01 |
| C1orf200 | -0.72 | 7.64E-01 | -0.62 | 7.34E-01 | 0.91  | 1.81E-01 |
| PRR18    | -0.72 | 7.64E-01 | 0.01  | 4.98E-01 | -0.71 | 7.62E-01 |
| C2CD3    | -0.72 | 7.64E-01 | -0.51 | 6.96E-01 | -1.38 | 9.16E-01 |
| CCBL1    | -0.72 | 7.64E-01 | -0.99 | 8.39E-01 | 0.67  | 2.53E-01 |
| MYL4     | -0.72 | 7.64E-01 | 0.13  | 4.50E-01 | 0.29  | 3.85E-01 |
| CDC27    | -0.72 | 7.64E-01 | -1.12 | 8.68E-01 | 0.83  | 2.03E-01 |
| MMP19    | -0.72 | 7.64E-01 | -0.79 | 7.84E-01 | -1.54 | 9.38E-01 |
| OR6Q1    | -0.72 | 7.64E-01 | -0.92 | 8.22E-01 | -1.30 | 9.03E-01 |
| PLET1    | -0.72 | 7.65E-01 | -0.74 | 7.69E-01 | -0.72 | 7.64E-01 |
| WDR17    | -0.72 | 7.65E-01 | -1.58 | 9.43E-01 | -0.34 | 6.34E-01 |
| DOCK1    | -0.72 | 7.65E-01 | -1.52 | 9.35E-01 | 0.97  | 1.65E-01 |
| PPP1CC   | -0.72 | 7.65E-01 | -1.29 | 9.01E-01 | -1.47 | 9.29E-01 |
| CNDP1    | -0.72 | 7.65E-01 | -0.83 | 7.96E-01 | -1.17 | 8.78E-01 |
| C7orf62  | -0.72 | 7.65E-01 | 0.86  | 1.96E-01 | 1.08  | 1.41E-01 |
| PLEKHA2  | -0.72 | 7.65E-01 | 0.62  | 2.69E-01 | -2.01 | 9.78E-01 |
| ENO2     | -0.72 | 7.65E-01 | -0.69 | 7.55E-01 | 0.28  | 3.88E-01 |

|            |       |          |       |          |       |          |
|------------|-------|----------|-------|----------|-------|----------|
| SEMA4F     | -0.72 | 7.65E-01 | -1.40 | 9.19E-01 | -0.27 | 6.08E-01 |
| PYDC2      | -0.72 | 7.65E-01 | 0.02  | 4.90E-01 | 0.71  | 2.39E-01 |
| FANCC      | -0.72 | 7.65E-01 | -0.68 | 7.53E-01 | -1.77 | 9.61E-01 |
| TSFM       | -0.72 | 7.65E-01 | -0.16 | 5.63E-01 | -0.26 | 6.02E-01 |
| PNPLA6     | -0.72 | 7.65E-01 | -0.93 | 8.24E-01 | 0.30  | 3.82E-01 |
| ACTR8      | -0.72 | 7.65E-01 | -1.33 | 9.08E-01 | 0.16  | 4.36E-01 |
| WNT7B      | -0.72 | 7.65E-01 | -1.71 | 9.56E-01 | -0.45 | 6.73E-01 |
| FAM154A    | -0.72 | 7.65E-01 | -0.05 | 5.20E-01 | 0.08  | 4.70E-01 |
| DNAJC6     | -0.72 | 7.65E-01 | -1.54 | 9.39E-01 | -0.89 | 8.12E-01 |
| ADAMTS15   | -0.72 | 7.65E-01 | -1.25 | 8.94E-01 | -0.60 | 7.25E-01 |
| GALNT1     | -0.72 | 7.66E-01 | -1.13 | 8.70E-01 | -0.56 | 7.12E-01 |
| CLEC4D     | -0.72 | 7.66E-01 | 0.89  | 1.87E-01 | 0.03  | 4.88E-01 |
| LRRK1      | -0.72 | 7.66E-01 | -0.52 | 6.97E-01 | -0.50 | 6.91E-01 |
| HBS1L      | -0.72 | 7.66E-01 | -1.13 | 8.70E-01 | -0.58 | 7.18E-01 |
| ADCY4      | -0.72 | 7.66E-01 | -1.35 | 9.12E-01 | -0.78 | 7.84E-01 |
| CCNDBP1    | -0.72 | 7.66E-01 | -0.24 | 5.96E-01 | -0.76 | 7.77E-01 |
| PATZ1      | -0.73 | 7.66E-01 | -0.55 | 7.09E-01 | -0.47 | 6.82E-01 |
| TAF9       | -0.73 | 7.66E-01 | -1.33 | 9.08E-01 | -0.22 | 5.86E-01 |
| AC139100.2 | -0.73 | 7.66E-01 | -1.26 | 8.96E-01 | 0.53  | 2.97E-01 |
| SEC31B     | -0.73 | 7.66E-01 | -1.16 | 8.76E-01 | -0.49 | 6.89E-01 |
| CTRL       | -0.73 | 7.66E-01 | 0.09  | 4.63E-01 | -0.51 | 6.93E-01 |
| PLA2G2D    | -0.73 | 7.66E-01 | -1.04 | 8.51E-01 | 1.22  | 1.12E-01 |
| DISC1      | -0.73 | 7.66E-01 | 2.24  | 1.25E-02 | 0.65  | 2.59E-01 |
| SARS       | -0.73 | 7.66E-01 | -0.94 | 8.26E-01 | -1.44 | 9.25E-01 |
| ASB7       | -0.73 | 7.66E-01 | -1.04 | 8.52E-01 | -0.24 | 5.95E-01 |
| AKR1C1     | -0.73 | 7.66E-01 | -0.26 | 6.04E-01 | -1.02 | 8.46E-01 |
| DOPEY1     | -0.73 | 7.67E-01 | 0.13  | 4.48E-01 | 0.26  | 3.97E-01 |
| HGFAC      | -0.73 | 7.67E-01 | 0.62  | 2.67E-01 | -0.73 | 7.66E-01 |
| EBF1       | -0.73 | 7.67E-01 | -0.41 | 6.60E-01 | -1.36 | 9.13E-01 |
| RAP1GAP2   | -0.73 | 7.67E-01 | -0.59 | 7.23E-01 | 0.30  | 3.83E-01 |
| MYOT       | -0.73 | 7.67E-01 | -1.19 | 8.83E-01 | 0.29  | 3.85E-01 |

|          |       |          |       |          |       |          |
|----------|-------|----------|-------|----------|-------|----------|
| B3GNTL1  | -0.73 | 7.67E-01 | -0.73 | 7.68E-01 | -0.73 | 7.69E-01 |
| EFNA5    | -0.73 | 7.67E-01 | 0.98  | 1.64E-01 | 0.61  | 2.70E-01 |
| SRCRB4D  | -0.73 | 7.67E-01 | -0.33 | 6.29E-01 | -1.15 | 8.75E-01 |
| VPS39    | -0.73 | 7.67E-01 | -0.15 | 5.59E-01 | -1.20 | 8.86E-01 |
| BCMO1    | -0.73 | 7.67E-01 | -1.05 | 8.54E-01 | -0.83 | 7.97E-01 |
| NUSAP1   | -0.73 | 7.67E-01 | -0.73 | 7.67E-01 | -1.38 | 9.16E-01 |
| STK11IP  | -0.73 | 7.67E-01 | -0.12 | 5.49E-01 | -0.12 | 5.49E-01 |
| SERPINB2 | -0.73 | 7.67E-01 | 0.30  | 3.81E-01 | -0.67 | 7.48E-01 |
| CIAO1    | -0.73 | 7.67E-01 | -0.64 | 7.40E-01 | -1.56 | 9.40E-01 |
| SV2B     | -0.73 | 7.67E-01 | -0.43 | 6.65E-01 | -0.55 | 7.09E-01 |
| NKX3-1   | -0.73 | 7.67E-01 | -0.99 | 8.40E-01 | -0.46 | 6.76E-01 |
| FAM180A  | -0.73 | 7.67E-01 | -0.86 | 8.06E-01 | -0.45 | 6.73E-01 |
| NFYC     | -0.73 | 7.67E-01 | -0.57 | 7.16E-01 | -0.45 | 6.75E-01 |
| BSCL2    | -0.73 | 7.67E-01 | -0.34 | 6.34E-01 | -1.98 | 9.76E-01 |
| MYCBPAP  | -0.73 | 7.67E-01 | -0.85 | 8.04E-01 | 0.47  | 3.20E-01 |
| TTL      | -0.73 | 7.68E-01 | -1.58 | 9.43E-01 | 0.62  | 2.69E-01 |
| CYGB     | -0.73 | 7.68E-01 | -0.09 | 5.37E-01 | 1.05  | 1.47E-01 |
| ECE2     | -0.73 | 7.68E-01 | -0.49 | 6.87E-01 | -0.52 | 6.99E-01 |
| TAGAP    | -0.73 | 7.68E-01 | -0.28 | 6.11E-01 | 0.40  | 3.44E-01 |
| CCNT1    | -0.73 | 7.68E-01 | 0.28  | 3.88E-01 | 1.71  | 4.34E-02 |
| NUBP2    | -0.73 | 7.68E-01 | -0.62 | 7.34E-01 | -0.16 | 5.64E-01 |
| C10orf67 | -0.73 | 7.68E-01 | -0.73 | 7.67E-01 | 0.21  | 4.17E-01 |
| PAFAH1B1 | -0.73 | 7.68E-01 | -1.05 | 8.53E-01 | -0.89 | 8.12E-01 |
| SKI      | -0.73 | 7.68E-01 | -1.85 | 9.68E-01 | 0.15  | 4.42E-01 |
| ZNF16    | -0.73 | 7.68E-01 | -0.02 | 5.06E-01 | -0.59 | 7.23E-01 |
| EIF3H    | -0.73 | 7.68E-01 | 0.24  | 4.06E-01 | 0.62  | 2.68E-01 |
| MIR3654  | -0.73 | 7.68E-01 | 0.23  | 4.10E-01 | -0.05 | 5.18E-01 |
| IL1R2    | -0.73 | 7.68E-01 | -0.23 | 5.91E-01 | -0.70 | 7.59E-01 |
| CCDC106  | -0.73 | 7.68E-01 | -0.25 | 5.99E-01 | -1.01 | 8.44E-01 |
| FBXL13   | -0.73 | 7.68E-01 | -0.66 | 7.44E-01 | -0.77 | 7.78E-01 |
| UBXN2B   | -0.73 | 7.69E-01 | -0.13 | 5.50E-01 | 1.08  | 1.41E-01 |

|             |       |          |       |          |       |          |
|-------------|-------|----------|-------|----------|-------|----------|
| PLXNB1      | -0.73 | 7.69E-01 | 0.07  | 4.74E-01 | 0.55  | 2.92E-01 |
| C1QTNF1-AS1 | -0.73 | 7.69E-01 | -1.17 | 8.78E-01 | 0.40  | 3.43E-01 |
| OR10X1      | -0.73 | 7.69E-01 | -1.25 | 8.94E-01 | -0.85 | 8.04E-01 |
| RSPH6A      | -0.73 | 7.69E-01 | -0.87 | 8.07E-01 | -0.59 | 7.22E-01 |
| PCDHA11     | -0.73 | 7.69E-01 | -1.60 | 9.45E-01 | -0.44 | 6.70E-01 |
| HECTD3      | -0.73 | 7.69E-01 | 0.00  | 5.01E-01 | 0.06  | 4.77E-01 |
| FANCG       | -0.74 | 7.69E-01 | -1.83 | 9.66E-01 | 0.61  | 2.71E-01 |
| RANGAP1     | -0.74 | 7.69E-01 | -0.89 | 8.13E-01 | -1.49 | 9.32E-01 |
| PTPN5       | -0.74 | 7.69E-01 | -0.65 | 7.43E-01 | 0.60  | 2.73E-01 |
| ATM         | -0.74 | 7.69E-01 | -0.35 | 6.35E-01 | -0.31 | 6.22E-01 |
| SKA2        | -0.74 | 7.69E-01 | 0.75  | 2.26E-01 | -0.17 | 5.69E-01 |
| MLST8       | -0.74 | 7.69E-01 | -0.05 | 5.19E-01 | -0.82 | 7.95E-01 |
| NCL         | -0.74 | 7.69E-01 | 0.58  | 2.80E-01 | 2.63  | 4.29E-03 |
| LYZL1       | -0.74 | 7.70E-01 | 1.63  | 5.18E-02 | -0.83 | 7.96E-01 |
| NCAPD2      | -0.74 | 7.70E-01 | -0.08 | 5.33E-01 | -0.20 | 5.79E-01 |
| MRPL23      | -0.74 | 7.70E-01 | 0.02  | 4.92E-01 | 0.14  | 4.45E-01 |
| WDR47       | -0.74 | 7.70E-01 | -0.33 | 6.29E-01 | 0.36  | 3.58E-01 |
| RAB5C       | -0.74 | 7.70E-01 | 1.00  | 1.60E-01 | 0.90  | 1.83E-01 |
| DDX31       | -0.74 | 7.70E-01 | -0.37 | 6.44E-01 | 0.12  | 4.51E-01 |
| LACC1       | -0.74 | 7.70E-01 | 0.09  | 4.65E-01 | -0.25 | 6.00E-01 |
| LOXHD1      | -0.74 | 7.70E-01 | -1.51 | 9.35E-01 | 1.95  | 2.55E-02 |
| INPP5J      | -0.74 | 7.70E-01 | -1.65 | 9.50E-01 | -0.22 | 5.88E-01 |
| SETD7       | -0.74 | 7.70E-01 | -0.97 | 8.35E-01 | 1.38  | 8.30E-02 |
| SMYD1       | -0.74 | 7.70E-01 | 0.10  | 4.60E-01 | 2.10  | 1.77E-02 |
| PLTP        | -0.74 | 7.70E-01 | -0.46 | 6.77E-01 | -0.38 | 6.47E-01 |
| CASP2       | -0.74 | 7.70E-01 | -1.49 | 9.32E-01 | -0.18 | 5.72E-01 |
| PIRT        | -0.74 | 7.70E-01 | 0.45  | 3.28E-01 | -0.88 | 8.11E-01 |
| GNB5        | -0.74 | 7.71E-01 | 0.59  | 2.77E-01 | -0.97 | 8.33E-01 |
| CEP76       | -0.74 | 7.71E-01 | 0.65  | 2.56E-01 | -0.80 | 7.90E-01 |
| C14orf23    | -0.74 | 7.71E-01 | 0.29  | 3.85E-01 | -0.44 | 6.72E-01 |
| EDRF1       | -0.74 | 7.71E-01 | 0.80  | 2.12E-01 | -0.53 | 7.02E-01 |

|            |       |          |       |          |       |          |
|------------|-------|----------|-------|----------|-------|----------|
| SLC12A5    | -0.74 | 7.71E-01 | -0.57 | 7.16E-01 | -0.18 | 5.72E-01 |
| ANOS       | -0.74 | 7.71E-01 | -0.66 | 7.45E-01 | -0.68 | 7.51E-01 |
| MFN2       | -0.74 | 7.71E-01 | -0.03 | 5.10E-01 | -1.10 | 8.65E-01 |
| CSGALNACT1 | -0.74 | 7.71E-01 | 0.87  | 1.92E-01 | -0.22 | 5.87E-01 |
| RASSF6     | -0.74 | 7.71E-01 | -0.32 | 6.24E-01 | -1.32 | 9.06E-01 |
| LINC00998  | -0.74 | 7.71E-01 | 0.21  | 4.16E-01 | -0.92 | 8.22E-01 |
| FGD4       | -0.74 | 7.71E-01 | -0.27 | 6.08E-01 | -0.82 | 7.93E-01 |
| COX7A2L    | -0.74 | 7.71E-01 | 0.51  | 3.05E-01 | 0.02  | 4.92E-01 |
| EFNA4      | -0.74 | 7.72E-01 | -0.40 | 6.54E-01 | 0.16  | 4.38E-01 |
| CEACAM1    | -0.74 | 7.72E-01 | -0.68 | 7.52E-01 | 0.64  | 2.63E-01 |
| AMFR       | -0.74 | 7.72E-01 | -0.58 | 7.19E-01 | 1.15  | 1.26E-01 |
| MYL2       | -0.74 | 7.72E-01 | -0.89 | 8.12E-01 | 0.07  | 4.72E-01 |
| KLK7       | -0.74 | 7.72E-01 | -1.43 | 9.24E-01 | -0.49 | 6.89E-01 |
| COG8       | -0.74 | 7.72E-01 | 0.14  | 4.43E-01 | 1.69  | 4.51E-02 |
| FAM110A    | -0.74 | 7.72E-01 | -1.47 | 9.30E-01 | -0.21 | 5.82E-01 |
| MAPK8IP1   | -0.74 | 7.72E-01 | 0.86  | 1.95E-01 | 1.15  | 1.24E-01 |
| DOCK6      | -0.74 | 7.72E-01 | -0.26 | 6.03E-01 | -0.72 | 7.64E-01 |
| LRGUK      | -0.74 | 7.72E-01 | -0.34 | 6.31E-01 | -1.42 | 9.22E-01 |
| GLCE       | -0.75 | 7.72E-01 | -0.20 | 5.77E-01 | -0.75 | 7.74E-01 |
| ASAH2      | -0.75 | 7.72E-01 | 0.00  | 5.01E-01 | -0.12 | 5.49E-01 |
| ANKRD28    | -0.75 | 7.72E-01 | -0.26 | 6.02E-01 | -0.28 | 6.11E-01 |
| KRT78      | -0.75 | 7.72E-01 | -0.33 | 6.28E-01 | -0.66 | 7.47E-01 |
| CDC40      | -0.75 | 7.72E-01 | 0.90  | 1.85E-01 | -0.15 | 5.59E-01 |
| CCAR1      | -0.75 | 7.72E-01 | -0.80 | 7.89E-01 | 0.08  | 4.67E-01 |
| HAPLN4     | -0.75 | 7.72E-01 | -1.56 | 9.41E-01 | -0.54 | 7.07E-01 |
| RGS2       | -0.75 | 7.72E-01 | -3.04 | 9.99E-01 | -0.22 | 5.88E-01 |
| PCDHA8     | -0.75 | 7.72E-01 | -1.64 | 9.50E-01 | -0.46 | 6.76E-01 |
| SPAG6      | -0.75 | 7.72E-01 | -0.78 | 7.81E-01 | 1.15  | 1.25E-01 |
| TNK2       | -0.75 | 7.73E-01 | -0.56 | 7.13E-01 | -0.67 | 7.49E-01 |
| PLBD1      | -0.75 | 7.73E-01 | -2.14 | 9.84E-01 | 0.11  | 4.56E-01 |
| DNASE1L3   | -0.75 | 7.73E-01 | -1.19 | 8.82E-01 | -0.94 | 8.27E-01 |

|                |       |          |       |          |       |          |
|----------------|-------|----------|-------|----------|-------|----------|
| PTBP1          | -0.75 | 7.73E-01 | 0.23  | 4.09E-01 | 0.61  | 2.72E-01 |
| S100A13        | -0.75 | 7.73E-01 | -1.06 | 8.56E-01 | 0.10  | 4.60E-01 |
| SRP68          | -0.75 | 7.73E-01 | 0.39  | 3.48E-01 | 0.22  | 4.11E-01 |
| EPS15L1        | -0.75 | 7.73E-01 | -1.48 | 9.30E-01 | 0.28  | 3.90E-01 |
| TGFA           | -0.75 | 7.73E-01 | 1.79  | 3.71E-02 | 0.78  | 2.18E-01 |
| FIGNL1         | -0.75 | 7.73E-01 | 0.45  | 3.25E-01 | 0.65  | 2.57E-01 |
| GSTM2          | -0.75 | 7.73E-01 | -0.13 | 5.53E-01 | 1.06  | 1.44E-01 |
| ZMYND15        | -0.75 | 7.73E-01 | -0.77 | 7.80E-01 | 0.40  | 3.46E-01 |
| DUSP5          | -0.75 | 7.73E-01 | -0.63 | 7.34E-01 | -0.89 | 8.13E-01 |
| SLC1A4         | -0.75 | 7.73E-01 | -0.41 | 6.61E-01 | 0.50  | 3.09E-01 |
| HNRNPUL2-BSCL2 | -0.75 | 7.73E-01 | -0.29 | 6.14E-01 | -2.11 | 9.83E-01 |
| IMPG2          | -0.75 | 7.73E-01 | -0.82 | 7.94E-01 | -1.29 | 9.02E-01 |
| FOLR1          | -0.75 | 7.73E-01 | 1.06  | 1.46E-01 | 0.40  | 3.43E-01 |
| SYNJ2          | -0.75 | 7.73E-01 | -1.26 | 8.97E-01 | -0.42 | 6.63E-01 |
| GOLGA3         | -0.75 | 7.73E-01 | 0.77  | 2.20E-01 | -0.76 | 7.77E-01 |
| TOB2           | -0.75 | 7.73E-01 | -0.41 | 6.60E-01 | -0.51 | 6.96E-01 |
| RNASE1         | -0.75 | 7.73E-01 | 1.13  | 1.28E-01 | 0.58  | 2.83E-01 |
| FAM198A        | -0.75 | 7.73E-01 | -1.06 | 8.55E-01 | -1.07 | 8.57E-01 |
| BTAF1          | -0.75 | 7.73E-01 | -0.87 | 8.09E-01 | -0.57 | 7.17E-01 |
| KIF21A         | -0.75 | 7.73E-01 | -1.21 | 8.86E-01 | -0.01 | 5.04E-01 |
| PTS            | -0.75 | 7.73E-01 | -0.78 | 7.81E-01 | -0.53 | 7.02E-01 |
| ABHD14B        | -0.75 | 7.73E-01 | -0.29 | 6.12E-01 | -1.87 | 9.70E-01 |
| ABHD14A        | -0.75 | 7.73E-01 | -0.29 | 6.12E-01 | -1.87 | 9.70E-01 |
| MAPKAPK5       | -0.75 | 7.73E-01 | -0.49 | 6.88E-01 | -0.93 | 8.23E-01 |
| PCDHA10        | -0.75 | 7.73E-01 | -1.64 | 9.50E-01 | -0.45 | 6.74E-01 |
| PCDHA9         | -0.75 | 7.73E-01 | -1.65 | 9.50E-01 | -0.45 | 6.74E-01 |
| CXCL2          | -0.75 | 7.73E-01 | 0.01  | 4.97E-01 | -0.74 | 7.71E-01 |
| KNOP1          | -0.75 | 7.73E-01 | -1.70 | 9.56E-01 | -0.52 | 7.00E-01 |
| TMCC1          | -0.75 | 7.73E-01 | -0.80 | 7.89E-01 | 0.05  | 4.78E-01 |
| USP12          | -0.75 | 7.74E-01 | -0.92 | 8.21E-01 | -0.39 | 6.51E-01 |
| EIF4A1         | -0.75 | 7.74E-01 | 0.62  | 2.67E-01 | -0.57 | 7.15E-01 |

|         |       |          |       |          |       |          |
|---------|-------|----------|-------|----------|-------|----------|
| RASAL2  | -0.75 | 7.74E-01 | -0.20 | 5.79E-01 | 0.76  | 2.23E-01 |
| SMCP    | -0.75 | 7.74E-01 | -0.07 | 5.27E-01 | -0.69 | 7.56E-01 |
| H2AFV   | -0.75 | 7.74E-01 | -0.95 | 8.30E-01 | -0.03 | 5.13E-01 |
| TRIOBP  | -0.75 | 7.74E-01 | -0.88 | 8.11E-01 | 0.02  | 4.93E-01 |
| HSPA14  | -0.75 | 7.74E-01 | -1.81 | 9.65E-01 | -0.42 | 6.64E-01 |
| PRR11   | -0.75 | 7.74E-01 | -0.15 | 5.60E-01 | -0.33 | 6.31E-01 |
| PCDHB6  | -0.75 | 7.74E-01 | -0.79 | 7.84E-01 | -0.43 | 6.68E-01 |
| BCL6B   | -0.75 | 7.74E-01 | -0.85 | 8.04E-01 | -0.56 | 7.11E-01 |
| SH2D6   | -0.75 | 7.74E-01 | -0.66 | 7.46E-01 | 0.11  | 4.56E-01 |
| CLEC4A  | -0.75 | 7.74E-01 | 1.19  | 1.16E-01 | 0.93  | 1.76E-01 |
| GOLPH3  | -0.75 | 7.74E-01 | 0.97  | 1.66E-01 | 0.27  | 3.94E-01 |
| KCNH2   | -0.75 | 7.74E-01 | -0.20 | 5.78E-01 | 0.61  | 2.71E-01 |
| CNPY1   | -0.75 | 7.74E-01 | 0.27  | 3.92E-01 | -0.84 | 8.00E-01 |
| SNX10   | -0.75 | 7.74E-01 | 1.10  | 1.35E-01 | -1.04 | 8.51E-01 |
| PCDHA7  | -0.75 | 7.74E-01 | -1.65 | 9.50E-01 | -0.45 | 6.75E-01 |
| FAM159B | -0.75 | 7.75E-01 | -0.96 | 8.31E-01 | 0.07  | 4.71E-01 |
| GOLM1   | -0.75 | 7.75E-01 | 0.65  | 2.59E-01 | 0.31  | 3.77E-01 |
| TKT     | -0.75 | 7.75E-01 | -0.67 | 7.49E-01 | -0.41 | 6.60E-01 |
| ARID3B  | -0.75 | 7.75E-01 | -1.17 | 8.78E-01 | -0.56 | 7.14E-01 |
| MCIDAS  | -0.75 | 7.75E-01 | -0.36 | 6.41E-01 | 0.69  | 2.46E-01 |
| GCLM    | -0.76 | 7.75E-01 | -0.29 | 6.15E-01 | 0.65  | 2.57E-01 |
| UNC13B  | -0.75 | 7.75E-01 | 0.39  | 3.50E-01 | -1.07 | 8.58E-01 |
| OR51T1  | -0.76 | 7.75E-01 | 0.47  | 3.18E-01 | -0.27 | 6.06E-01 |
| OR1J1   | -0.76 | 7.75E-01 | -0.81 | 7.92E-01 | -0.81 | 7.91E-01 |
| TIMM10  | -0.76 | 7.75E-01 | 0.15  | 4.42E-01 | -1.09 | 8.61E-01 |
| INTS9   | -0.76 | 7.75E-01 | -0.73 | 7.67E-01 | 0.98  | 1.63E-01 |
| GZMB    | -0.76 | 7.75E-01 | -0.83 | 7.97E-01 | -0.34 | 6.35E-01 |
| AQP12A  | -0.76 | 7.75E-01 | -0.56 | 7.13E-01 | -1.31 | 9.05E-01 |
| KAAG1   | -0.76 | 7.75E-01 | -1.11 | 8.67E-01 | -0.91 | 8.18E-01 |
| IZUMO3  | -0.76 | 7.75E-01 | 0.61  | 2.71E-01 | -0.11 | 5.43E-01 |
| DNAJC1  | -0.76 | 7.75E-01 | -1.13 | 8.70E-01 | -0.63 | 7.36E-01 |

|            |       |          |       |          |       |          |
|------------|-------|----------|-------|----------|-------|----------|
| KCNG2      | -0.76 | 7.75E-01 | -0.60 | 7.25E-01 | -2.13 | 9.83E-01 |
| MROH6      | -0.76 | 7.75E-01 | -0.93 | 8.25E-01 | 0.84  | 2.02E-01 |
| OBP2B      | -0.76 | 7.75E-01 | 0.39  | 3.49E-01 | 1.09  | 1.38E-01 |
| TRAPPC13   | -0.76 | 7.75E-01 | -1.22 | 8.88E-01 | -0.20 | 5.79E-01 |
| BIVM-ERCC5 | -0.76 | 7.76E-01 | 0.39  | 3.49E-01 | -0.64 | 7.39E-01 |
| ADAMTS12   | -0.76 | 7.76E-01 | 0.89  | 1.88E-01 | 1.42  | 7.73E-02 |
| INO80B     | -0.76 | 7.76E-01 | -2.41 | 9.92E-01 | -0.12 | 5.47E-01 |
| QSOX1      | -0.76 | 7.76E-01 | -0.06 | 5.23E-01 | -0.33 | 6.28E-01 |
| PPY        | -0.76 | 7.76E-01 | -0.69 | 7.54E-01 | -2.04 | 9.80E-01 |
| ADHFE1     | -0.76 | 7.76E-01 | -0.59 | 7.21E-01 | 0.13  | 4.50E-01 |
| RPL37A     | -0.76 | 7.76E-01 | -1.74 | 9.59E-01 | 0.61  | 2.72E-01 |
| HPX        | -0.76 | 7.76E-01 | 0.07  | 4.73E-01 | -1.10 | 8.65E-01 |
| PISD       | -0.76 | 7.76E-01 | -0.72 | 7.65E-01 | 0.07  | 4.71E-01 |
| TMEM231    | -0.76 | 7.76E-01 | -0.14 | 5.55E-01 | -1.21 | 8.88E-01 |
| CST4       | -0.76 | 7.76E-01 | 0.67  | 2.52E-01 | -0.30 | 6.17E-01 |
| C9orf131   | -0.76 | 7.76E-01 | -0.96 | 8.32E-01 | 0.10  | 4.58E-01 |
| PCDHA6     | -0.76 | 7.76E-01 | -1.67 | 9.52E-01 | -0.44 | 6.72E-01 |
| ZNF513     | -0.76 | 7.76E-01 | -0.39 | 6.53E-01 | 0.89  | 1.88E-01 |
| KCNK18     | -0.76 | 7.76E-01 | 0.25  | 4.01E-01 | 0.60  | 2.73E-01 |
| NME4       | -0.76 | 7.77E-01 | -1.26 | 8.96E-01 | -0.91 | 8.18E-01 |
| UGT1A7     | -0.76 | 7.77E-01 | -0.40 | 6.56E-01 | -0.13 | 5.51E-01 |
| CUEDC2     | -0.76 | 7.77E-01 | -0.52 | 7.00E-01 | -0.48 | 6.84E-01 |
| PRDM15     | -0.76 | 7.77E-01 | -0.81 | 7.92E-01 | -0.94 | 8.27E-01 |
| LEFTY1     | -0.76 | 7.77E-01 | -0.76 | 7.77E-01 | 0.30  | 3.84E-01 |
| IFNA17     | -0.76 | 7.77E-01 | -0.81 | 7.92E-01 | -1.34 | 9.09E-01 |
| POLG2      | -0.76 | 7.77E-01 | 0.86  | 1.95E-01 | -0.15 | 5.60E-01 |
| SLC16A13   | -0.76 | 7.77E-01 | 0.63  | 2.64E-01 | -0.66 | 7.44E-01 |
| SLC16A14   | -0.76 | 7.77E-01 | -1.55 | 9.39E-01 | 0.44  | 3.32E-01 |
| GCSAM      | -0.76 | 7.77E-01 | -0.22 | 5.86E-01 | 0.18  | 4.28E-01 |
| LFNG       | -0.76 | 7.77E-01 | 1.20  | 1.16E-01 | 0.28  | 3.91E-01 |
| TMEM116    | -0.76 | 7.77E-01 | -0.77 | 7.78E-01 | -0.81 | 7.92E-01 |



|          |       |          |       |          |       |          |
|----------|-------|----------|-------|----------|-------|----------|
| SULT6B1  | -0.76 | 7.77E-01 | -0.05 | 5.20E-01 | 0.20  | 4.21E-01 |
| RORB     | -0.76 | 7.77E-01 | -1.12 | 8.68E-01 | -0.12 | 5.48E-01 |
| FAM57B   | -0.76 | 7.77E-01 | -0.58 | 7.20E-01 | 0.27  | 3.94E-01 |
| TPM3     | -0.76 | 7.78E-01 | -0.42 | 6.63E-01 | -1.58 | 9.43E-01 |
| FBXW4    | -0.76 | 7.78E-01 | -0.52 | 6.99E-01 | 1.21  | 1.12E-01 |
| PQLC3    | -0.76 | 7.78E-01 | -1.57 | 9.42E-01 | -0.22 | 5.87E-01 |
| MYL12B   | -0.76 | 7.78E-01 | 0.28  | 3.89E-01 | 0.83  | 2.04E-01 |
| FGF8     | -0.76 | 7.78E-01 | -0.26 | 6.01E-01 | -0.26 | 6.03E-01 |
| TCEB2    | -0.76 | 7.78E-01 | -0.44 | 6.72E-01 | -0.71 | 7.62E-01 |
| SMURF2   | -0.76 | 7.78E-01 | 1.31  | 9.51E-02 | 0.23  | 4.09E-01 |
| SYT2     | -0.76 | 7.78E-01 | -0.93 | 8.23E-01 | -0.70 | 7.57E-01 |
| CMC1     | -0.76 | 7.78E-01 | -0.55 | 7.10E-01 | 0.43  | 3.32E-01 |
| EME2     | -0.77 | 7.78E-01 | -0.44 | 6.68E-01 | 0.03  | 4.87E-01 |
| RELL1    | -0.77 | 7.78E-01 | 0.16  | 4.37E-01 | -1.07 | 8.58E-01 |
| KCNN2    | -0.77 | 7.78E-01 | -0.76 | 7.75E-01 | -1.58 | 9.43E-01 |
| NOS1AP   | -0.77 | 7.78E-01 | -0.40 | 6.57E-01 | -2.47 | 9.93E-01 |
| IFIT5    | -0.77 | 7.78E-01 | 0.15  | 4.39E-01 | 1.03  | 1.53E-01 |
| SPSB3    | -0.77 | 7.78E-01 | -0.60 | 7.26E-01 | -0.16 | 5.63E-01 |
| CYB561A3 | -0.77 | 7.78E-01 | -0.24 | 5.94E-01 | -0.84 | 8.00E-01 |
| PCDHA12  | -0.77 | 7.78E-01 | -1.60 | 9.45E-01 | -0.46 | 6.77E-01 |
| KCNJ15   | -0.77 | 7.78E-01 | -0.71 | 7.61E-01 | 1.12  | 1.32E-01 |
| JAZF1    | -0.77 | 7.78E-01 | -0.94 | 8.26E-01 | -1.22 | 8.89E-01 |
| ZNF593   | -0.77 | 7.79E-01 | -1.35 | 9.11E-01 | -0.99 | 8.40E-01 |
| GALNT15  | -0.77 | 7.79E-01 | -1.77 | 9.62E-01 | -0.29 | 6.16E-01 |
| OPN3     | -0.77 | 7.79E-01 | -1.11 | 8.66E-01 | -1.05 | 8.53E-01 |
| ANKRD11  | -0.77 | 7.79E-01 | -0.31 | 6.22E-01 | -1.45 | 9.26E-01 |
| ERV3-1   | -0.77 | 7.79E-01 | -0.55 | 7.09E-01 | -1.84 | 9.67E-01 |
| NID2     | -0.77 | 7.79E-01 | -1.50 | 9.33E-01 | 0.63  | 2.65E-01 |
| RALGAPA2 | -0.77 | 7.79E-01 | -0.92 | 8.22E-01 | -1.13 | 8.71E-01 |
| CGB7     | -0.77 | 7.79E-01 | 1.44  | 7.44E-02 | 0.78  | 2.18E-01 |
| PCDHA5   | -0.77 | 7.79E-01 | -1.69 | 9.54E-01 | -0.44 | 6.70E-01 |

|          |       |          |       |          |       |          |
|----------|-------|----------|-------|----------|-------|----------|
| DUSP28   | -0.77 | 7.79E-01 | -0.65 | 7.43E-01 | -0.13 | 5.51E-01 |
| KIAA1456 | -0.77 | 7.79E-01 | -1.41 | 9.20E-01 | 0.50  | 3.09E-01 |
| USH2A    | -0.77 | 7.79E-01 | -1.35 | 9.11E-01 | 0.13  | 4.48E-01 |
| LRRC72   | -0.77 | 7.79E-01 | -1.19 | 8.83E-01 | -1.54 | 9.38E-01 |
| CHRNA9   | -0.77 | 7.79E-01 | 0.44  | 3.29E-01 | -2.30 | 9.89E-01 |
| DYX1C1   | -0.77 | 7.79E-01 | -0.07 | 5.27E-01 | -0.40 | 6.56E-01 |
| NYNRIN   | -0.77 | 7.79E-01 | 0.48  | 3.16E-01 | -0.10 | 5.41E-01 |
| SLC47A2  | -0.77 | 7.79E-01 | -1.05 | 8.52E-01 | 0.12  | 4.51E-01 |
| ZC3H12D  | -0.77 | 7.80E-01 | -1.92 | 9.73E-01 | -0.09 | 5.35E-01 |
| CLOCK    | -0.77 | 7.80E-01 | -1.20 | 8.85E-01 | 0.06  | 4.76E-01 |
| SLC2A11  | -0.77 | 7.80E-01 | -0.41 | 6.60E-01 | -0.83 | 7.96E-01 |
| ZBTB37   | -0.77 | 7.80E-01 | 0.55  | 2.92E-01 | 0.06  | 4.77E-01 |
| ZNF224   | -0.77 | 7.80E-01 | -0.72 | 7.64E-01 | -0.48 | 6.86E-01 |
| CCBE1    | -0.77 | 7.80E-01 | -0.52 | 6.98E-01 | -0.61 | 7.28E-01 |
| PRKRIP1  | -0.77 | 7.80E-01 | -0.20 | 5.80E-01 | -0.16 | 5.64E-01 |
| RRP15    | -0.77 | 7.80E-01 | 0.03  | 4.89E-01 | -0.51 | 6.96E-01 |
| CACNA1A  | -0.77 | 7.80E-01 | 1.10  | 1.36E-01 | -1.34 | 9.10E-01 |
| ZNF117   | -0.77 | 7.80E-01 | -0.64 | 7.40E-01 | -1.72 | 9.57E-01 |
| ADCY9    | -0.77 | 7.80E-01 | -0.34 | 6.35E-01 | 0.17  | 4.32E-01 |
| NUP62    | -0.77 | 7.80E-01 | -0.04 | 5.15E-01 | 0.50  | 3.09E-01 |
| SLCO2B1  | -0.77 | 7.80E-01 | 1.11  | 1.33E-01 | 2.03  | 2.10E-02 |
| DDI2     | -0.77 | 7.80E-01 | -1.18 | 8.80E-01 | -0.17 | 5.67E-01 |
| DNAJC9   | -0.77 | 7.80E-01 | -1.10 | 8.64E-01 | -0.55 | 7.10E-01 |
| SKOR2    | -0.77 | 7.80E-01 | -0.71 | 7.61E-01 | -1.59 | 9.44E-01 |
| TEKT2    | -0.77 | 7.80E-01 | -0.01 | 5.05E-01 | -0.85 | 8.02E-01 |
| NPHP3    | -0.77 | 7.80E-01 | -0.51 | 6.95E-01 | -0.26 | 6.03E-01 |
| POLD3    | -0.77 | 7.81E-01 | -0.70 | 7.58E-01 | -0.85 | 8.02E-01 |
| CPSF7    | -0.77 | 7.81E-01 | -0.35 | 6.38E-01 | -1.07 | 8.57E-01 |
| DSCR8    | -0.77 | 7.81E-01 | -0.49 | 6.88E-01 | 1.20  | 1.14E-01 |
| PNPLA1   | -0.77 | 7.81E-01 | -0.10 | 5.39E-01 | -0.66 | 7.46E-01 |
| DLC1     | -0.77 | 7.81E-01 | -0.55 | 7.08E-01 | 0.25  | 4.02E-01 |

|           |       |          |       |          |       |          |
|-----------|-------|----------|-------|----------|-------|----------|
| DNAAF1    | -0.77 | 7.81E-01 | 2.15  | 1.59E-02 | 2.00  | 2.28E-02 |
| DZANK1    | -0.77 | 7.81E-01 | 0.28  | 3.89E-01 | -0.58 | 7.21E-01 |
| CDK6      | -0.77 | 7.81E-01 | -0.02 | 5.10E-01 | 0.25  | 4.03E-01 |
| PXDC1     | -0.78 | 7.81E-01 | -0.35 | 6.36E-01 | -1.15 | 8.75E-01 |
| PCDHA13   | -0.78 | 7.81E-01 | -1.61 | 9.46E-01 | -0.46 | 6.78E-01 |
| TCOF1     | -0.78 | 7.81E-01 | 0.06  | 4.77E-01 | -0.63 | 7.36E-01 |
| LIMCH1    | -0.78 | 7.81E-01 | -0.21 | 5.82E-01 | -0.56 | 7.12E-01 |
| DCAF10    | -0.78 | 7.81E-01 | -0.73 | 7.66E-01 | 0.18  | 4.30E-01 |
| MED8      | -0.78 | 7.81E-01 | -0.37 | 6.43E-01 | -0.04 | 5.14E-01 |
| CCNO      | -0.78 | 7.81E-01 | -0.05 | 5.19E-01 | -0.81 | 7.91E-01 |
| HIF1AN    | -0.78 | 7.81E-01 | -1.05 | 8.54E-01 | -0.58 | 7.20E-01 |
| KIAA0100  | -0.78 | 7.81E-01 | -0.60 | 7.25E-01 | -0.07 | 5.27E-01 |
| ANAPC13   | -0.78 | 7.81E-01 | -0.43 | 6.66E-01 | -0.79 | 7.86E-01 |
| SLC1A3    | -0.78 | 7.81E-01 | -0.27 | 6.05E-01 | 0.28  | 3.91E-01 |
| MSX2      | -0.78 | 7.81E-01 | -1.25 | 8.94E-01 | -0.40 | 6.57E-01 |
| FN3KRP    | -0.78 | 7.81E-01 | -0.29 | 6.16E-01 | -1.22 | 8.88E-01 |
| GRAMD1B   | -0.78 | 7.82E-01 | -1.70 | 9.55E-01 | -1.11 | 8.67E-01 |
| IRG1      | -0.78 | 7.82E-01 | 0.59  | 2.78E-01 | -0.45 | 6.74E-01 |
| PIK3R4    | -0.78 | 7.82E-01 | -0.77 | 7.81E-01 | -1.32 | 9.06E-01 |
| RAB11FIP1 | -0.78 | 7.82E-01 | -0.22 | 5.89E-01 | 0.31  | 3.79E-01 |
| RAB24     | -0.78 | 7.82E-01 | 1.02  | 1.54E-01 | 0.46  | 3.23E-01 |
| TMEM78    | -0.78 | 7.82E-01 | 0.57  | 2.84E-01 | -0.44 | 6.69E-01 |
| GLO1      | -0.78 | 7.82E-01 | 0.59  | 2.78E-01 | -1.12 | 8.69E-01 |
| C9orf156  | -0.78 | 7.82E-01 | -0.58 | 7.19E-01 | 0.11  | 4.57E-01 |
| CAPZA3    | -0.78 | 7.82E-01 | -0.94 | 8.27E-01 | -1.24 | 8.92E-01 |
| RAD51D    | -0.78 | 7.82E-01 | -0.62 | 7.32E-01 | -0.49 | 6.87E-01 |
| MRPL9     | -0.78 | 7.82E-01 | 0.11  | 4.57E-01 | -0.69 | 7.54E-01 |
| DNAJB6    | -0.78 | 7.82E-01 | -0.46 | 6.78E-01 | -1.41 | 9.20E-01 |
| COMMD4    | -0.78 | 7.82E-01 | -0.39 | 6.53E-01 | -0.66 | 7.47E-01 |
| R3HDML    | -0.78 | 7.82E-01 | 0.40  | 3.46E-01 | -0.28 | 6.11E-01 |
| KLHL9     | -0.78 | 7.82E-01 | -0.79 | 7.86E-01 | -1.13 | 8.72E-01 |

|          |       |          |       |          |       |          |
|----------|-------|----------|-------|----------|-------|----------|
| CRY2     | -0.78 | 7.82E-01 | -0.20 | 5.81E-01 | -0.02 | 5.06E-01 |
| GRB7     | -0.78 | 7.82E-01 | -0.71 | 7.61E-01 | -1.15 | 8.76E-01 |
| PPP2R5E  | -0.78 | 7.83E-01 | -0.64 | 7.40E-01 | -0.40 | 6.54E-01 |
| GPBP1L1  | -0.78 | 7.83E-01 | 0.52  | 3.00E-01 | 0.31  | 3.79E-01 |
| GPR85    | -0.78 | 7.83E-01 | -1.52 | 9.36E-01 | -1.05 | 8.54E-01 |
| SLC22A10 | -0.78 | 7.83E-01 | 0.70  | 2.43E-01 | 0.42  | 3.39E-01 |
| KRR1     | -0.78 | 7.83E-01 | -0.78 | 7.83E-01 | -1.04 | 8.50E-01 |
| PDXP     | -0.78 | 7.83E-01 | -0.61 | 7.29E-01 | -1.11 | 8.66E-01 |
| PTK2B    | -0.78 | 7.83E-01 | 0.26  | 3.98E-01 | 0.59  | 2.78E-01 |
| TBC1D9   | -0.78 | 7.83E-01 | -0.87 | 8.07E-01 | -1.42 | 9.23E-01 |
| GNAS     | -0.78 | 7.83E-01 | -0.43 | 6.66E-01 | 0.35  | 3.65E-01 |
| PCDHAC1  | -0.78 | 7.83E-01 | -1.61 | 9.46E-01 | -0.41 | 6.59E-01 |
| APOBEC3F | -0.78 | 7.83E-01 | -0.56 | 7.11E-01 | -0.45 | 6.72E-01 |
| ARC      | -0.78 | 7.83E-01 | -0.54 | 7.06E-01 | 0.55  | 2.91E-01 |
| LIG4     | -0.78 | 7.83E-01 | -1.26 | 8.97E-01 | 0.48  | 3.16E-01 |
| ZNF280B  | -0.78 | 7.83E-01 | -1.18 | 8.82E-01 | 0.34  | 3.67E-01 |
| VPS37B   | -0.78 | 7.83E-01 | -0.19 | 5.75E-01 | 0.85  | 1.97E-01 |
| ALOX12B  | -0.78 | 7.83E-01 | -0.49 | 6.88E-01 | 0.63  | 2.66E-01 |
| GNA13    | -0.78 | 7.83E-01 | 0.76  | 2.23E-01 | 0.19  | 4.26E-01 |
| CRTAP    | -0.78 | 7.84E-01 | -1.47 | 9.29E-01 | 0.01  | 4.96E-01 |
| SPINK9   | -0.78 | 7.84E-01 | -1.18 | 8.80E-01 | -0.37 | 6.45E-01 |
| OTP      | -0.79 | 7.84E-01 | 1.20  | 1.16E-01 | 2.35  | 9.46E-03 |
| RIMKLA   | -0.79 | 7.84E-01 | 0.54  | 2.93E-01 | -0.64 | 7.40E-01 |
| FABP12   | -0.79 | 7.84E-01 | -0.33 | 6.30E-01 | -0.80 | 7.87E-01 |
| SEL1L2   | -0.79 | 7.84E-01 | -1.41 | 9.21E-01 | 0.03  | 4.87E-01 |
| NDUFA12  | -0.79 | 7.84E-01 | 0.32  | 3.73E-01 | -0.43 | 6.67E-01 |
| CLDN1    | -0.79 | 7.84E-01 | 1.45  | 7.37E-02 | 0.28  | 3.90E-01 |
| CD207    | -0.79 | 7.84E-01 | 1.27  | 1.02E-01 | -0.32 | 6.26E-01 |
| TXNDC11  | -0.79 | 7.84E-01 | 0.09  | 4.66E-01 | -1.52 | 9.36E-01 |
| NECAP1   | -0.79 | 7.84E-01 | -0.81 | 7.92E-01 | -0.76 | 7.77E-01 |
| CACNA1H  | -0.79 | 7.84E-01 | -0.22 | 5.88E-01 | 0.66  | 2.54E-01 |

|         |       |          |       |          |       |          |
|---------|-------|----------|-------|----------|-------|----------|
| FAM196B | -0.79 | 7.84E-01 | -0.63 | 7.37E-01 | -2.25 | 9.88E-01 |
| DECR2   | -0.79 | 7.84E-01 | -1.12 | 8.68E-01 | -0.94 | 8.26E-01 |
| NOL7    | -0.79 | 7.84E-01 | -1.02 | 8.47E-01 | -0.38 | 6.47E-01 |
| ZBP1    | -0.79 | 7.84E-01 | -1.39 | 9.18E-01 | 0.63  | 2.63E-01 |
| NOL12   | -0.79 | 7.84E-01 | -1.08 | 8.60E-01 | 0.03  | 4.89E-01 |
| ZFH2    | -0.79 | 7.85E-01 | -0.07 | 5.27E-01 | -1.42 | 9.22E-01 |
| NUP188  | -0.79 | 7.85E-01 | -0.92 | 8.22E-01 | -0.17 | 5.69E-01 |
| WDR64   | -0.79 | 7.85E-01 | -0.99 | 8.38E-01 | -1.46 | 9.27E-01 |
| RPS5    | -0.79 | 7.85E-01 | -1.16 | 8.77E-01 | -0.34 | 6.35E-01 |
| NME5    | -0.79 | 7.85E-01 | -1.09 | 8.62E-01 | 0.27  | 3.93E-01 |
| TLX2    | -0.79 | 7.85E-01 | -0.89 | 8.14E-01 | 0.11  | 4.56E-01 |
| SAP30   | -0.79 | 7.85E-01 | -0.31 | 6.23E-01 | -0.36 | 6.39E-01 |
| IL25    | -0.79 | 7.85E-01 | -0.85 | 8.04E-01 | -1.27 | 8.99E-01 |
| ACTR3C  | -0.79 | 7.85E-01 | -0.85 | 8.02E-01 | -0.41 | 6.60E-01 |
| IFT46   | -0.79 | 7.85E-01 | -0.86 | 8.05E-01 | -0.56 | 7.12E-01 |
| TTLL6   | -0.79 | 7.85E-01 | -0.59 | 7.22E-01 | -0.93 | 8.25E-01 |
| STK39   | -0.79 | 7.85E-01 | 1.21  | 1.13E-01 | -0.35 | 6.36E-01 |
| DAPP1   | -0.79 | 7.85E-01 | -0.40 | 6.54E-01 | 0.53  | 2.98E-01 |
| SGMS2   | -0.79 | 7.85E-01 | -0.99 | 8.38E-01 | 0.00  | 4.99E-01 |
| ZC3H7A  | -0.79 | 7.85E-01 | 0.12  | 4.53E-01 | -1.45 | 9.27E-01 |
| SERTM1  | -0.79 | 7.85E-01 | 0.02  | 4.91E-01 | -1.09 | 8.61E-01 |
| CHRNA5  | -0.79 | 7.85E-01 | -0.99 | 8.38E-01 | 0.42  | 3.37E-01 |
| ZNF827  | -0.79 | 7.86E-01 | -0.83 | 7.95E-01 | -0.69 | 7.55E-01 |
| ZNF253  | -0.79 | 7.86E-01 | 0.15  | 4.39E-01 | 0.06  | 4.77E-01 |
| DDX24   | -0.79 | 7.86E-01 | -0.55 | 7.09E-01 | 1.04  | 1.49E-01 |
| PKLR    | -0.79 | 7.86E-01 | -0.55 | 7.09E-01 | -1.43 | 9.24E-01 |
| MAP3K10 | -0.79 | 7.86E-01 | 0.66  | 2.56E-01 | 0.11  | 4.56E-01 |
| DGKH    | -0.79 | 7.86E-01 | -0.13 | 5.52E-01 | -0.55 | 7.07E-01 |
| C9      | -0.79 | 7.86E-01 | -1.07 | 8.58E-01 | -0.47 | 6.81E-01 |
| ITGB7   | -0.79 | 7.86E-01 | 0.05  | 4.82E-01 | 0.41  | 3.41E-01 |
| BLCAP   | -0.79 | 7.86E-01 | 0.51  | 3.06E-01 | 1.20  | 1.15E-01 |

|            |      |       |          |       |          |       |          |
|------------|------|-------|----------|-------|----------|-------|----------|
| EVPLL      |      | -0.79 | 7.86E-01 | 0.65  | 2.57E-01 | 0.25  | 4.00E-01 |
| TMEM89     |      | -0.79 | 7.86E-01 | 0.45  | 3.26E-01 | 1.54  | 6.16E-02 |
| PCDHA4     |      | -0.79 | 7.86E-01 | -1.70 | 9.55E-01 | -0.41 | 6.61E-01 |
| RBP4       |      | -0.79 | 7.86E-01 | -0.75 | 7.74E-01 | 0.94  | 1.73E-01 |
| NXPE2      |      | -0.79 | 7.86E-01 | 0.87  | 1.92E-01 | -0.03 | 5.11E-01 |
| SLCO5A1    |      | -0.79 | 7.86E-01 | -1.02 | 8.46E-01 | -1.46 | 9.27E-01 |
| PRH1       |      | -0.79 | 7.86E-01 | -0.31 | 6.21E-01 | 0.26  | 3.98E-01 |
|            | GRAP | -0.79 | 7.86E-01 | -1.61 | 9.46E-01 | -0.84 | 8.00E-01 |
| DOCK8      |      | -0.79 | 7.86E-01 | -0.58 | 7.19E-01 | -2.38 | 9.91E-01 |
| ERVFRD-1   |      | -0.79 | 7.86E-01 | -1.35 | 9.12E-01 | -0.38 | 6.47E-01 |
| NDUFS2     |      | -0.79 | 7.87E-01 | -0.52 | 7.00E-01 | -0.65 | 7.41E-01 |
| OSBPL11    |      | -0.79 | 7.87E-01 | -0.91 | 8.20E-01 | -0.27 | 6.05E-01 |
| A2M        |      | -0.79 | 7.87E-01 | -0.53 | 7.02E-01 | 0.36  | 3.60E-01 |
| ANXA5      |      | -0.79 | 7.87E-01 | -1.79 | 9.63E-01 | -0.71 | 7.63E-01 |
| TMEM105    |      | -0.80 | 7.87E-01 | -0.25 | 6.00E-01 | 0.02  | 4.90E-01 |
| HES5       |      | -0.80 | 7.87E-01 | -2.16 | 9.85E-01 | 0.11  | 4.55E-01 |
| RPL28      |      | -0.80 | 7.87E-01 | -0.47 | 6.81E-01 | -0.66 | 7.45E-01 |
| ADA        |      | -0.80 | 7.87E-01 | -0.96 | 8.32E-01 | -0.10 | 5.40E-01 |
| TAS2R60    |      | -0.80 | 7.87E-01 | -0.48 | 6.86E-01 | -0.74 | 7.71E-01 |
| LGALS4     |      | -0.80 | 7.87E-01 | -0.99 | 8.39E-01 | -0.23 | 5.93E-01 |
| FAM107B    |      | -0.80 | 7.87E-01 | -0.19 | 5.76E-01 | 0.49  | 3.11E-01 |
| PREPL      |      | -0.80 | 7.87E-01 | -0.59 | 7.22E-01 | 0.30  | 3.84E-01 |
| DMPK       |      | -0.80 | 7.87E-01 | 0.05  | 4.80E-01 | 0.08  | 4.67E-01 |
| SPATA24    |      | -0.80 | 7.87E-01 | -0.28 | 6.10E-01 | -0.13 | 5.52E-01 |
| SLC4A3     |      | -0.80 | 7.87E-01 | -0.50 | 6.91E-01 | -1.15 | 8.75E-01 |
| SLC26A3    |      | -0.80 | 7.87E-01 | -0.43 | 6.66E-01 | -1.09 | 8.63E-01 |
| MYH1       |      | -0.80 | 7.87E-01 | -0.09 | 5.34E-01 | -2.06 | 9.80E-01 |
| ST6GALNAC1 |      | -0.80 | 7.87E-01 | -0.54 | 7.06E-01 | -0.45 | 6.74E-01 |
| PRTFDC1    |      | -0.80 | 7.88E-01 | -0.39 | 6.52E-01 | 1.51  | 6.55E-02 |
| MFGE8      |      | -0.80 | 7.88E-01 | -0.56 | 7.13E-01 | -0.99 | 8.40E-01 |
| FGD6       |      | -0.80 | 7.88E-01 | -0.43 | 6.65E-01 | -0.69 | 7.56E-01 |

|         |       |          |       |          |       |          |
|---------|-------|----------|-------|----------|-------|----------|
| TBX3    | -0.80 | 7.88E-01 | -1.50 | 9.33E-01 | 0.71  | 2.38E-01 |
| SIRT6   | -0.80 | 7.88E-01 | 0.05  | 4.81E-01 | -0.15 | 5.58E-01 |
| EN2     | -0.80 | 7.88E-01 | 0.19  | 4.25E-01 | -1.68 | 9.54E-01 |
| PNO1    | -0.80 | 7.88E-01 | 0.11  | 4.55E-01 | -0.56 | 7.12E-01 |
| SCGB2A1 | -0.80 | 7.88E-01 | -0.07 | 5.28E-01 | -0.58 | 7.21E-01 |
| IPP     | -0.80 | 7.88E-01 | 0.53  | 2.98E-01 | 0.16  | 4.38E-01 |
| C7orf73 | -0.80 | 7.88E-01 | -0.99 | 8.40E-01 | -1.67 | 9.52E-01 |
| MFSD12  | -0.80 | 7.88E-01 | -0.72 | 7.64E-01 | 1.57  | 5.83E-02 |
| ATXN10  | -0.80 | 7.88E-01 | -1.32 | 9.07E-01 | -0.32 | 6.27E-01 |
| M1AP    | -0.80 | 7.88E-01 | -1.21 | 8.88E-01 | -0.39 | 6.50E-01 |
| FOXP1   | -0.80 | 7.88E-01 | -1.50 | 9.33E-01 | -0.65 | 7.42E-01 |
| MAATS1  | -0.80 | 7.88E-01 | 1.14  | 1.28E-01 | 0.18  | 4.27E-01 |
| NIPAL3  | -0.80 | 7.88E-01 | -0.79 | 7.85E-01 | -0.23 | 5.93E-01 |
| AIFM2   | -0.80 | 7.88E-01 | -0.23 | 5.91E-01 | -0.97 | 8.33E-01 |
| UBR1    | -0.80 | 7.88E-01 | -0.60 | 7.25E-01 | -0.69 | 7.56E-01 |
| IL1B    | -0.80 | 7.88E-01 | -1.06 | 8.56E-01 | -1.05 | 8.54E-01 |
| HTR2B   | -0.80 | 7.88E-01 | 0.20  | 4.21E-01 | -0.61 | 7.28E-01 |
| ZFYVE26 | -0.80 | 7.88E-01 | -0.21 | 5.84E-01 | -0.98 | 8.35E-01 |
| MUC2    | -0.80 | 7.88E-01 | -0.14 | 5.54E-01 | -0.50 | 6.92E-01 |
| ZC2HC1B | -0.80 | 7.88E-01 | -0.59 | 7.24E-01 | -1.25 | 8.94E-01 |
| LDHA    | -0.80 | 7.88E-01 | -0.58 | 7.20E-01 | -0.91 | 8.20E-01 |
| TBX10   | -0.80 | 7.89E-01 | -1.16 | 8.76E-01 | -0.02 | 5.10E-01 |
| PAX1    | -0.80 | 7.89E-01 | -0.53 | 7.03E-01 | 0.03  | 4.88E-01 |
| SPC25   | -0.80 | 7.89E-01 | -1.29 | 9.02E-01 | -0.17 | 5.67E-01 |
| ADSL    | -0.80 | 7.89E-01 | 0.55  | 2.90E-01 | -1.11 | 8.67E-01 |
| KDM8    | -0.80 | 7.89E-01 | 0.87  | 1.91E-01 | 0.10  | 4.61E-01 |
| MOB3B   | -0.80 | 7.89E-01 | -0.44 | 6.69E-01 | -1.23 | 8.90E-01 |
| DEFB115 | -0.80 | 7.89E-01 | 1.88  | 3.00E-02 | 0.59  | 2.77E-01 |
| PDE11A  | -0.80 | 7.89E-01 | -0.70 | 7.58E-01 | 0.18  | 4.27E-01 |
| PTPN22  | -0.80 | 7.89E-01 | -0.70 | 7.59E-01 | -1.70 | 9.55E-01 |
| PPWD1   | -0.80 | 7.89E-01 | -1.10 | 8.65E-01 | -0.33 | 6.28E-01 |

|          |       |          |       |          |       |          |
|----------|-------|----------|-------|----------|-------|----------|
| DYNC1LI2 | -0.80 | 7.89E-01 | -0.51 | 6.95E-01 | 0.54  | 2.94E-01 |
| CCL25    | -0.80 | 7.89E-01 | -1.31 | 9.05E-01 | -0.62 | 7.32E-01 |
| RBM27    | -0.81 | 7.90E-01 | 0.11  | 4.58E-01 | 0.87  | 1.93E-01 |
| ACAD10   | -0.81 | 7.90E-01 | -0.67 | 7.49E-01 | -0.35 | 6.35E-01 |
| RANBP3   | -0.81 | 7.90E-01 | -0.65 | 7.43E-01 | -0.38 | 6.48E-01 |
| NOM1     | -0.81 | 7.90E-01 | -0.26 | 6.03E-01 | 1.01  | 1.55E-01 |
| ABCC5    | -0.81 | 7.90E-01 | -0.08 | 5.34E-01 | -0.39 | 6.50E-01 |
| ARHGDI1A | -0.81 | 7.90E-01 | -0.39 | 6.53E-01 | -1.18 | 8.81E-01 |
| OR8B12   | -0.81 | 7.90E-01 | -1.43 | 9.24E-01 | -0.86 | 8.04E-01 |
| C1QL4    | -0.81 | 7.90E-01 | 0.85  | 1.99E-01 | 0.00  | 4.99E-01 |
| USP3     | -0.81 | 7.90E-01 | -1.57 | 9.42E-01 | 0.19  | 4.24E-01 |
| ADAMTSL5 | -0.81 | 7.90E-01 | -0.48 | 6.85E-01 | -0.56 | 7.13E-01 |
| SCN4A    | -0.81 | 7.90E-01 | 0.35  | 3.65E-01 | -0.58 | 7.19E-01 |
| NOD2     | -0.81 | 7.90E-01 | 0.28  | 3.90E-01 | -1.47 | 9.29E-01 |
| ERI2     | -0.81 | 7.90E-01 | -0.10 | 5.38E-01 | -0.01 | 5.02E-01 |
| CIDEB    | -0.81 | 7.90E-01 | -0.65 | 7.43E-01 | -2.33 | 9.90E-01 |
| FRS2     | -0.81 | 7.90E-01 | 0.09  | 4.66E-01 | 0.04  | 4.84E-01 |
| TMEM192  | -0.81 | 7.90E-01 | -0.52 | 6.98E-01 | -0.47 | 6.82E-01 |
| KLRC1    | -0.81 | 7.90E-01 | -0.38 | 6.46E-01 | 0.27  | 3.93E-01 |
| C1orf177 | -0.81 | 7.90E-01 | 0.36  | 3.59E-01 | 0.23  | 4.10E-01 |
| PLIN2    | -0.81 | 7.90E-01 | -0.82 | 7.93E-01 | 0.52  | 3.03E-01 |
| KERA     | -0.81 | 7.90E-01 | -0.66 | 7.45E-01 | -0.75 | 7.73E-01 |
| METTL21C | -0.81 | 7.91E-01 | 1.00  | 1.59E-01 | 1.63  | 5.14E-02 |
| ZMIZ2    | -0.81 | 7.91E-01 | 0.17  | 4.31E-01 | 0.61  | 2.71E-01 |
| CCBL2    | -0.81 | 7.91E-01 | 0.69  | 2.46E-01 | 1.37  | 8.55E-02 |
| FAM133B  | -0.81 | 7.91E-01 | 0.11  | 4.56E-01 | 0.17  | 4.33E-01 |
| C11orf58 | -0.81 | 7.91E-01 | -0.49 | 6.89E-01 | -0.66 | 7.47E-01 |
| ABHD17A  | -0.81 | 7.91E-01 | 1.43  | 7.57E-02 | 0.70  | 2.41E-01 |
| TSPAN12  | -0.81 | 7.91E-01 | -0.85 | 8.03E-01 | -0.96 | 8.31E-01 |
| NEIL1    | -0.81 | 7.91E-01 | -1.60 | 9.46E-01 | -0.86 | 8.04E-01 |
| OBSL1    | -0.81 | 7.91E-01 | -0.30 | 6.19E-01 | -0.57 | 7.17E-01 |



|          |       |          |       |          |       |          |
|----------|-------|----------|-------|----------|-------|----------|
| EVC      | -0.81 | 7.91E-01 | -1.48 | 9.30E-01 | 0.43  | 3.35E-01 |
| NAPEPLD  | -0.81 | 7.91E-01 | -1.07 | 8.59E-01 | -0.87 | 8.07E-01 |
| ZC3H13   | -0.81 | 7.91E-01 | 0.28  | 3.91E-01 | -1.08 | 8.59E-01 |
| C16orf95 | -0.81 | 7.91E-01 | -1.27 | 8.99E-01 | -0.75 | 7.73E-01 |
| MAN2B2   | -0.81 | 7.91E-01 | 0.67  | 2.51E-01 | -0.49 | 6.88E-01 |
| UBXN6    | -0.81 | 7.92E-01 | -1.01 | 8.43E-01 | -0.31 | 6.21E-01 |
| WRN      | -0.81 | 7.92E-01 | -1.39 | 9.17E-01 | -0.29 | 6.16E-01 |
| CST9     | -0.81 | 7.92E-01 | -0.44 | 6.69E-01 | 0.07  | 4.70E-01 |
| TARM1    | -0.81 | 7.92E-01 | -0.80 | 7.87E-01 | -0.58 | 7.20E-01 |
| STRBP    | -0.81 | 7.92E-01 | -0.32 | 6.26E-01 | -1.84 | 9.67E-01 |
| CALB2    | -0.81 | 7.92E-01 | -1.74 | 9.59E-01 | -0.51 | 6.95E-01 |
| PCDHA3   | -0.81 | 7.92E-01 | -1.73 | 9.59E-01 | -0.39 | 6.52E-01 |
| USP22    | -0.81 | 7.92E-01 | -0.40 | 6.54E-01 | -0.85 | 8.02E-01 |
| SIGLECL1 | -0.81 | 7.92E-01 | 0.22  | 4.12E-01 | -0.66 | 7.45E-01 |
| PPP3CA   | -0.81 | 7.92E-01 | -1.16 | 8.76E-01 | -1.10 | 8.64E-01 |
| PCDHA2   | -0.81 | 7.92E-01 | -1.74 | 9.59E-01 | -0.37 | 6.43E-01 |
| OR4L1    | -0.81 | 7.92E-01 | 0.00  | 5.02E-01 | -0.40 | 6.56E-01 |
| BIN2     | -0.81 | 7.92E-01 | -0.62 | 7.31E-01 | -0.37 | 6.46E-01 |
| EGFLAM   | -0.81 | 7.92E-01 | -1.39 | 9.17E-01 | 0.17  | 4.33E-01 |
| NRP1     | -0.81 | 7.92E-01 | -0.72 | 7.64E-01 | -0.08 | 5.32E-01 |
| FLG      | -0.81 | 7.92E-01 | -0.64 | 7.38E-01 | -1.26 | 8.96E-01 |
| CDIPT    | -0.81 | 7.92E-01 | -0.56 | 7.13E-01 | -1.33 | 9.09E-01 |
| MORC2    | -0.81 | 7.92E-01 | -0.61 | 7.31E-01 | -0.73 | 7.68E-01 |
| CALCA    | -0.82 | 7.93E-01 | -2.16 | 9.85E-01 | -0.75 | 7.72E-01 |
| PSMA3    | -0.82 | 7.93E-01 | 0.69  | 2.46E-01 | 0.74  | 2.31E-01 |
| PGLS     | -0.82 | 7.93E-01 | -0.50 | 6.90E-01 | -0.07 | 5.28E-01 |
| POLR3K   | -0.82 | 7.93E-01 | -0.42 | 6.64E-01 | -0.79 | 7.86E-01 |
| FMO6P    | -0.82 | 7.93E-01 | -0.35 | 6.37E-01 | 0.10  | 4.60E-01 |
| RAB3D    | -0.82 | 7.93E-01 | -0.17 | 5.69E-01 | -1.20 | 8.85E-01 |
| GABRR1   | -0.82 | 7.93E-01 | -1.15 | 8.76E-01 | 0.12  | 4.52E-01 |
| SHH      | -0.82 | 7.93E-01 | 0.75  | 2.26E-01 | 0.66  | 2.54E-01 |

|              |       |          |       |          |       |          |
|--------------|-------|----------|-------|----------|-------|----------|
| TMEFF2       | -0.82 | 7.93E-01 | -0.09 | 5.34E-01 | -0.19 | 5.76E-01 |
| LRFN1        | -0.82 | 7.93E-01 | -0.47 | 6.82E-01 | -0.48 | 6.85E-01 |
| IFNK         | -0.82 | 7.93E-01 | -1.63 | 9.48E-01 | -0.27 | 6.06E-01 |
| PCDHA1       | -0.82 | 7.93E-01 | -1.76 | 9.61E-01 | -0.35 | 6.38E-01 |
| D2HGDH       | -0.82 | 7.93E-01 | -0.47 | 6.80E-01 | 0.60  | 2.74E-01 |
| RDH11        | -0.82 | 7.93E-01 | -0.46 | 6.78E-01 | -0.95 | 8.28E-01 |
| ANGPTL7      | -0.82 | 7.93E-01 | -0.58 | 7.20E-01 | -0.16 | 5.65E-01 |
| PAK2         | -0.82 | 7.93E-01 | -0.88 | 8.11E-01 | -0.81 | 7.91E-01 |
| REST         | -0.82 | 7.93E-01 | 1.71  | 4.34E-02 | -0.01 | 5.04E-01 |
| SPRR2F       | -0.82 | 7.93E-01 | -1.33 | 9.09E-01 | -1.30 | 9.03E-01 |
| TMPRSS11A    | -0.82 | 7.93E-01 | 0.00  | 4.98E-01 | -1.41 | 9.21E-01 |
| ZBTB6        | -0.82 | 7.93E-01 | -0.36 | 6.39E-01 | -1.62 | 9.47E-01 |
| OR4F15       | -0.82 | 7.93E-01 | 1.44  | 7.56E-02 | 1.24  | 1.07E-01 |
| LYG1         | -0.82 | 7.93E-01 | -0.18 | 5.72E-01 | -0.86 | 8.06E-01 |
| XBP1         | -0.82 | 7.93E-01 | 0.00  | 5.00E-01 | 1.15  | 1.26E-01 |
| CPLX1        | -0.82 | 7.94E-01 | -0.94 | 8.26E-01 | 0.39  | 3.47E-01 |
| NLGN2        | -0.82 | 7.94E-01 | -0.34 | 6.32E-01 | -0.43 | 6.65E-01 |
| MRPL12       | -0.82 | 7.94E-01 | -0.61 | 7.29E-01 | -1.05 | 8.53E-01 |
| RAD51L3-RFFL | -0.82 | 7.94E-01 | -0.56 | 7.13E-01 | -0.23 | 5.91E-01 |
| PLEKHA8      | -0.82 | 7.94E-01 | -1.02 | 8.47E-01 | -0.15 | 5.60E-01 |
| GON4L        | -0.82 | 7.94E-01 | 0.36  | 3.59E-01 | 0.10  | 4.61E-01 |
| CD8A         | -0.82 | 7.94E-01 | -0.51 | 6.95E-01 | -1.38 | 9.16E-01 |
| DLG4         | -0.82 | 7.94E-01 | -0.91 | 8.19E-01 | -0.41 | 6.60E-01 |
| ASF1A        | -0.82 | 7.94E-01 | 0.80  | 2.12E-01 | 1.34  | 9.02E-02 |
| SERTAD4      | -0.82 | 7.94E-01 | -1.68 | 9.53E-01 | 1.01  | 1.56E-01 |
| TMEM138      | -0.82 | 7.94E-01 | -0.11 | 5.45E-01 | -0.62 | 7.32E-01 |
| NCMAP        | -0.82 | 7.94E-01 | -0.05 | 5.21E-01 | 0.31  | 3.77E-01 |
| ATP13A2      | -0.82 | 7.94E-01 | -0.28 | 6.11E-01 | 0.68  | 2.50E-01 |
| LAMB1        | -0.82 | 7.94E-01 | -0.09 | 5.35E-01 | -0.63 | 7.35E-01 |
| GABRG3       | -0.82 | 7.94E-01 | 0.13  | 4.47E-01 | -0.27 | 6.06E-01 |
| CYP3A4       | -0.82 | 7.94E-01 | -0.57 | 7.15E-01 | -0.48 | 6.85E-01 |

|           |       |          |       |          |       |          |
|-----------|-------|----------|-------|----------|-------|----------|
| UBIAD1    | -0.82 | 7.94E-01 | 0.29  | 3.87E-01 | 0.02  | 4.92E-01 |
| CRHR2     | -0.82 | 7.94E-01 | -1.33 | 9.09E-01 | 0.21  | 4.18E-01 |
| HIBCH     | -0.82 | 7.94E-01 | -0.76 | 7.76E-01 | -0.82 | 7.94E-01 |
| EYA4      | -0.82 | 7.94E-01 | 0.54  | 2.94E-01 | -1.33 | 9.09E-01 |
| ACOX1     | -0.82 | 7.95E-01 | -1.41 | 9.20E-01 | 0.45  | 3.26E-01 |
| FAM83G    | -0.82 | 7.95E-01 | -0.82 | 7.93E-01 | -0.04 | 5.16E-01 |
| C1orf159  | -0.82 | 7.95E-01 | 1.18  | 1.18E-01 | 1.09  | 1.38E-01 |
| LY9       | -0.82 | 7.95E-01 | -1.09 | 8.63E-01 | 1.04  | 1.48E-01 |
| MNX1      | -0.82 | 7.95E-01 | -0.38 | 6.50E-01 | -1.25 | 8.95E-01 |
| RAB28     | -0.82 | 7.95E-01 | -0.04 | 5.16E-01 | 1.37  | 8.61E-02 |
| GFOD1     | -0.82 | 7.95E-01 | -0.82 | 7.93E-01 | 0.00  | 4.99E-01 |
| CNN2      | -0.82 | 7.95E-01 | -1.28 | 9.00E-01 | -0.42 | 6.62E-01 |
| IRF4      | -0.82 | 7.95E-01 | -0.44 | 6.71E-01 | 0.63  | 2.63E-01 |
| CLDN15    | -0.82 | 7.95E-01 | 0.09  | 4.65E-01 | -0.39 | 6.52E-01 |
| ZNF549    | -0.82 | 7.95E-01 | -0.44 | 6.68E-01 | -2.14 | 9.84E-01 |
| HN1L      | -0.83 | 7.95E-01 | -0.97 | 8.34E-01 | -0.19 | 5.75E-01 |
| OGFOD1    | -0.83 | 7.95E-01 | -1.11 | 8.66E-01 | 1.11  | 1.33E-01 |
| POU1F1    | -0.83 | 7.96E-01 | -0.66 | 7.47E-01 | 0.19  | 4.26E-01 |
| 43164     | -0.83 | 7.96E-01 | -0.16 | 5.65E-01 | -2.01 | 9.78E-01 |
| HMHB1     | -0.83 | 7.96E-01 | -0.92 | 8.20E-01 | -0.29 | 6.14E-01 |
| C14orf177 | -0.83 | 7.96E-01 | -0.11 | 5.43E-01 | -2.53 | 9.94E-01 |
| GPR153    | -0.83 | 7.96E-01 | -1.22 | 8.90E-01 | -1.19 | 8.84E-01 |
| MAD2L1    | -0.83 | 7.96E-01 | -0.38 | 6.47E-01 | 0.58  | 2.80E-01 |
| FTH1      | -0.83 | 7.96E-01 | -0.29 | 6.13E-01 | 1.41  | 7.98E-02 |
| CTSC      | -0.83 | 7.96E-01 | 0.24  | 4.03E-01 | -0.20 | 5.79E-01 |
| RCVRN     | -0.83 | 7.96E-01 | 0.23  | 4.10E-01 | 1.40  | 8.10E-02 |
| POLRMT    | -0.83 | 7.96E-01 | 0.28  | 3.91E-01 | -0.47 | 6.80E-01 |
| AAK1      | -0.83 | 7.96E-01 | 0.38  | 3.50E-01 | 1.94  | 2.61E-02 |
| ZNF180    | -0.83 | 7.96E-01 | -0.70 | 7.58E-01 | -0.69 | 7.56E-01 |
| EML6      | -0.83 | 7.96E-01 | -0.19 | 5.76E-01 | -0.49 | 6.87E-01 |
| CCT2      | -0.83 | 7.96E-01 | 0.59  | 2.76E-01 | -0.07 | 5.28E-01 |

|           |       |          |       |          |       |          |
|-----------|-------|----------|-------|----------|-------|----------|
| ZNF765    | -0.83 | 7.96E-01 | -1.07 | 8.57E-01 | -0.87 | 8.07E-01 |
| MTRF1     | -0.83 | 7.96E-01 | 0.80  | 2.13E-01 | 0.93  | 1.77E-01 |
| CPB1      | -0.83 | 7.96E-01 | -0.71 | 7.63E-01 | 1.43  | 7.58E-02 |
| TMEM62    | -0.83 | 7.96E-01 | 0.26  | 3.97E-01 | -1.14 | 8.73E-01 |
| ZNF491    | -0.83 | 7.97E-01 | -0.38 | 6.46E-01 | 0.42  | 3.39E-01 |
| TBX21     | -0.83 | 7.97E-01 | -0.55 | 7.11E-01 | -0.67 | 7.48E-01 |
| HDAC2     | -0.83 | 7.97E-01 | -0.46 | 6.77E-01 | -1.10 | 8.65E-01 |
| BAIAP2L1  | -0.83 | 7.97E-01 | 0.30  | 3.80E-01 | 0.52  | 3.02E-01 |
| UNKL      | -0.83 | 7.97E-01 | -1.22 | 8.89E-01 | -0.31 | 6.24E-01 |
| PLCXD2    | -0.83 | 7.97E-01 | -0.79 | 7.86E-01 | 0.76  | 2.24E-01 |
| ZNF324    | -0.83 | 7.97E-01 | -0.09 | 5.35E-01 | -0.58 | 7.20E-01 |
| PTGR1     | -0.83 | 7.97E-01 | -0.95 | 8.28E-01 | -0.27 | 6.07E-01 |
| KDELR1    | -0.83 | 7.97E-01 | 0.47  | 3.20E-01 | -1.31 | 9.05E-01 |
| NOP14     | -0.83 | 7.97E-01 | -0.15 | 5.59E-01 | -1.23 | 8.90E-01 |
| ADH1A     | -0.83 | 7.97E-01 | 0.12  | 4.50E-01 | -0.09 | 5.35E-01 |
| NKG2-E    | -0.83 | 7.97E-01 | -0.90 | 8.15E-01 | 0.01  | 4.97E-01 |
| ZNF335    | -0.83 | 7.97E-01 | -0.69 | 7.56E-01 | -0.86 | 8.04E-01 |
| HOXB1     | -0.83 | 7.97E-01 | 1.25  | 1.06E-01 | 1.36  | 8.71E-02 |
| CDKN1A    | -0.83 | 7.97E-01 | 0.49  | 3.12E-01 | -0.61 | 7.30E-01 |
| MMACHC    | -0.83 | 7.97E-01 | -0.58 | 7.17E-01 | -1.61 | 9.46E-01 |
| SCAMP1    | -0.83 | 7.97E-01 | -1.25 | 8.94E-01 | 0.43  | 3.35E-01 |
| ADAT1     | -0.83 | 7.97E-01 | -0.12 | 5.50E-01 | 0.06  | 4.77E-01 |
| RUSC1     | -0.83 | 7.97E-01 | -1.50 | 9.33E-01 | -0.39 | 6.53E-01 |
| GCHFR     | -0.83 | 7.97E-01 | -1.10 | 8.65E-01 | -1.32 | 9.06E-01 |
| PLCE1     | -0.83 | 7.97E-01 | 0.18  | 4.30E-01 | -1.92 | 9.73E-01 |
| ALG14     | -0.83 | 7.97E-01 | -0.55 | 7.10E-01 | 0.51  | 3.04E-01 |
| MANF      | -0.83 | 7.97E-01 | -0.66 | 7.45E-01 | -0.27 | 6.07E-01 |
| REEP6     | -0.83 | 7.97E-01 | -0.76 | 7.75E-01 | -1.70 | 9.55E-01 |
| KRTAP10-7 | -0.83 | 7.98E-01 | 0.20  | 4.20E-01 | 1.01  | 1.55E-01 |
| TLR2      | -0.83 | 7.98E-01 | -0.25 | 5.97E-01 | 0.25  | 4.02E-01 |
| RPL36AL   | -0.83 | 7.98E-01 | -0.74 | 7.70E-01 | -0.50 | 6.92E-01 |

|          |       |          |       |          |       |          |
|----------|-------|----------|-------|----------|-------|----------|
| MYOC     | -0.83 | 7.98E-01 | -0.64 | 7.40E-01 | -0.75 | 7.73E-01 |
| LIAS     | -0.83 | 7.98E-01 | -1.43 | 9.23E-01 | 0.15  | 4.40E-01 |
| ARID1B   | -0.83 | 7.98E-01 | -0.31 | 6.22E-01 | 0.03  | 4.87E-01 |
| NOC4L    | -0.83 | 7.98E-01 | -0.14 | 5.57E-01 | 0.66  | 2.54E-01 |
| GUCA1C   | -0.83 | 7.98E-01 | -0.74 | 7.71E-01 | 1.67  | 4.78E-02 |
| LINGO4   | -0.83 | 7.98E-01 | -0.22 | 5.87E-01 | -1.12 | 8.69E-01 |
| NAIF1    | -0.83 | 7.98E-01 | -1.52 | 9.36E-01 | -1.24 | 8.93E-01 |
| AQP12B   | -0.83 | 7.98E-01 | -0.83 | 7.96E-01 | -0.78 | 7.83E-01 |
| DCTN1    | -0.83 | 7.98E-01 | -1.04 | 8.50E-01 | 0.37  | 3.57E-01 |
| C2orf68  | -0.83 | 7.98E-01 | -0.28 | 6.09E-01 | -0.32 | 6.25E-01 |
| BPIFA3   | -0.83 | 7.98E-01 | -0.04 | 5.15E-01 | -0.31 | 6.22E-01 |
| KRT3     | -0.83 | 7.98E-01 | -0.55 | 7.07E-01 | 0.16  | 4.36E-01 |
| OR14A16  | -0.84 | 7.98E-01 | -0.87 | 8.09E-01 | -0.74 | 7.72E-01 |
| CNIH3    | -0.84 | 7.98E-01 | -0.40 | 6.54E-01 | -1.80 | 9.64E-01 |
| GLYCK    | -0.84 | 7.98E-01 | -1.47 | 9.29E-01 | 0.09  | 4.64E-01 |
| LIPH     | -0.84 | 7.98E-01 | -1.53 | 9.37E-01 | -0.64 | 7.39E-01 |
| MSL1     | -0.84 | 7.98E-01 | -1.23 | 8.90E-01 | -0.38 | 6.48E-01 |
| GATAD2A  | -0.84 | 7.98E-01 | -0.97 | 8.34E-01 | -1.35 | 9.11E-01 |
| TXNRD2   | -0.84 | 7.98E-01 | -0.26 | 6.02E-01 | -1.67 | 9.53E-01 |
| OSTN     | -0.84 | 7.98E-01 | -1.04 | 8.50E-01 | -0.59 | 7.23E-01 |
| CENPL    | -0.84 | 7.98E-01 | 0.10  | 4.59E-01 | -0.76 | 7.76E-01 |
| KCNE1    | -0.84 | 7.98E-01 | 0.03  | 4.90E-01 | -1.80 | 9.64E-01 |
| NEU4     | -0.84 | 7.98E-01 | -1.40 | 9.19E-01 | -0.09 | 5.37E-01 |
| TRIM22   | -0.84 | 7.98E-01 | 0.50  | 3.08E-01 | 0.59  | 2.77E-01 |
| CPSF4L   | -0.84 | 7.98E-01 | -0.50 | 6.91E-01 | -1.11 | 8.66E-01 |
| MAP2K3   | -0.84 | 7.98E-01 | -0.47 | 6.83E-01 | -0.31 | 6.22E-01 |
| APOL5    | -0.84 | 7.99E-01 | -1.02 | 8.46E-01 | 0.40  | 3.45E-01 |
| LTB4R2   | -0.84 | 7.99E-01 | -0.69 | 7.54E-01 | -2.37 | 9.91E-01 |
| APOBEC3G | -0.84 | 7.99E-01 | -0.90 | 8.16E-01 | -0.30 | 6.18E-01 |
| ACSM3    | -0.84 | 7.99E-01 | -0.17 | 5.69E-01 | 0.05  | 4.78E-01 |
| GP9      | -0.84 | 7.99E-01 | -1.15 | 8.74E-01 | -0.30 | 6.20E-01 |

|             |       |          |       |          |       |          |
|-------------|-------|----------|-------|----------|-------|----------|
| PPAPDC1A    | -0.84 | 7.99E-01 | 1.49  | 6.79E-02 | 1.59  | 5.55E-02 |
| PRR5        | -0.84 | 7.99E-01 | 0.43  | 3.35E-01 | -0.53 | 7.00E-01 |
| TPI1        | -0.84 | 7.99E-01 | -0.25 | 5.98E-01 | 0.42  | 3.37E-01 |
| ARCN1       | -0.84 | 7.99E-01 | -1.39 | 9.18E-01 | -0.49 | 6.86E-01 |
| RTFDC1      | -0.84 | 7.99E-01 | -1.66 | 9.52E-01 | 0.31  | 3.77E-01 |
| SCNN1G      | -0.84 | 7.99E-01 | 0.09  | 4.65E-01 | -0.46 | 6.77E-01 |
| ENPP4       | -0.84 | 7.99E-01 | -0.65 | 7.44E-01 | 0.08  | 4.69E-01 |
| SLITRK3     | -0.84 | 7.99E-01 | -1.38 | 9.16E-01 | 0.07  | 4.71E-01 |
| LIPC        | -0.84 | 7.99E-01 | -1.30 | 9.04E-01 | 0.41  | 3.42E-01 |
| CCL18       | -0.84 | 7.99E-01 | 0.22  | 4.14E-01 | -0.77 | 7.78E-01 |
| SSTR4       | -0.84 | 7.99E-01 | -0.44 | 6.70E-01 | -0.01 | 5.04E-01 |
| LOXL1       | -0.84 | 7.99E-01 | -0.62 | 7.31E-01 | -0.36 | 6.41E-01 |
| IMMT        | -0.84 | 7.99E-01 | -0.81 | 7.90E-01 | -0.20 | 5.79E-01 |
| EIF3G       | -0.84 | 7.99E-01 | -1.52 | 9.36E-01 | -0.42 | 6.63E-01 |
| C1orf204    | -0.84 | 7.99E-01 | 0.59  | 2.78E-01 | 0.50  | 3.10E-01 |
| C1orf123    | -0.84 | 8.00E-01 | 0.58  | 2.83E-01 | 0.48  | 3.15E-01 |
| FLYWCH2     | -0.84 | 8.00E-01 | 0.63  | 2.65E-01 | -0.44 | 6.71E-01 |
| PSMA6       | -0.84 | 8.00E-01 | 0.05  | 4.80E-01 | 0.08  | 4.68E-01 |
| SMG8        | -0.84 | 8.00E-01 | -0.21 | 5.83E-01 | -0.96 | 8.32E-01 |
| SEMA6B      | -0.84 | 8.00E-01 | 0.11  | 4.56E-01 | -0.04 | 5.14E-01 |
| PLEKHF2     | -0.84 | 8.00E-01 | -0.20 | 5.78E-01 | 0.53  | 2.98E-01 |
| RRAGA       | -0.84 | 8.00E-01 | 0.43  | 3.34E-01 | 1.09  | 1.37E-01 |
| MOCOS       | -0.84 | 8.00E-01 | -1.11 | 8.65E-01 | -0.35 | 6.39E-01 |
| SLC39A11    | -0.84 | 8.00E-01 | -0.08 | 5.31E-01 | -0.79 | 7.85E-01 |
| CYB5R1      | -0.84 | 8.00E-01 | -0.81 | 7.91E-01 | -0.57 | 7.16E-01 |
| TRDMT1      | -0.84 | 8.00E-01 | -2.03 | 9.79E-01 | 0.08  | 4.69E-01 |
| FAM120AOS   | -0.84 | 8.00E-01 | -0.25 | 5.97E-01 | -0.55 | 7.07E-01 |
| PRAMEF2     | -0.84 | 8.00E-01 | 0.10  | 4.59E-01 | -1.29 | 9.01E-01 |
| AC002472.13 | -0.84 | 8.00E-01 | -1.31 | 9.04E-01 | -0.43 | 6.66E-01 |
| MSRA        | -0.84 | 8.01E-01 | -0.66 | 7.46E-01 | -0.33 | 6.30E-01 |
| ZNF488      | -0.84 | 8.01E-01 | -1.15 | 8.75E-01 | -1.32 | 9.07E-01 |

|          |       |          |       |          |       |          |
|----------|-------|----------|-------|----------|-------|----------|
| GLIPR1L1 | -0.84 | 8.01E-01 | -0.81 | 7.92E-01 | -1.15 | 8.76E-01 |
| PLCG1    | -0.84 | 8.01E-01 | 0.42  | 3.36E-01 | -1.75 | 9.60E-01 |
| ZC3H12A  | -0.84 | 8.01E-01 | -0.38 | 6.49E-01 | -1.10 | 8.64E-01 |
| CHAF1A   | -0.84 | 8.01E-01 | -1.02 | 8.47E-01 | -0.68 | 7.53E-01 |
| CLDN4    | -0.84 | 8.01E-01 | -0.32 | 6.26E-01 | -0.27 | 6.05E-01 |
| LYPD6    | -0.84 | 8.01E-01 | -1.24 | 8.92E-01 | -1.27 | 8.97E-01 |
| COL10A1  | -0.84 | 8.01E-01 | 0.83  | 2.02E-01 | -0.73 | 7.67E-01 |
| SLC6A7   | -0.84 | 8.01E-01 | -0.95 | 8.29E-01 | -1.25 | 8.95E-01 |
| PROB1    | -0.84 | 8.01E-01 | -1.78 | 9.62E-01 | -0.57 | 7.16E-01 |
| MBD3L1   | -0.84 | 8.01E-01 | -0.20 | 5.80E-01 | -1.03 | 8.48E-01 |
| MESP2    | -0.84 | 8.01E-01 | -1.61 | 9.46E-01 | -0.34 | 6.32E-01 |
| PDK2     | -0.84 | 8.01E-01 | 0.60  | 2.74E-01 | -0.86 | 8.06E-01 |
| TAOK3    | -0.85 | 8.01E-01 | -0.21 | 5.82E-01 | -1.70 | 9.55E-01 |
| WEE1     | -0.85 | 8.01E-01 | -0.15 | 5.59E-01 | 0.27  | 3.95E-01 |
| IARS     | -0.85 | 8.01E-01 | -0.11 | 5.42E-01 | -2.26 | 9.88E-01 |
| PPP2R4   | -0.85 | 8.01E-01 | -0.22 | 5.88E-01 | 0.09  | 4.64E-01 |
| LPPR3    | -0.85 | 8.01E-01 | -0.91 | 8.19E-01 | -0.03 | 5.13E-01 |
| GAL      | -0.85 | 8.01E-01 | -0.84 | 8.01E-01 | -0.42 | 6.64E-01 |
| NDUFAF6  | -0.85 | 8.01E-01 | -1.62 | 9.48E-01 | -0.59 | 7.24E-01 |
| LEUTX    | -0.85 | 8.01E-01 | 0.47  | 3.19E-01 | 0.91  | 1.81E-01 |
| CAPRIN1  | -0.85 | 8.01E-01 | -0.62 | 7.31E-01 | -1.35 | 9.12E-01 |
| KATNBL1  | -0.85 | 8.01E-01 | -1.48 | 9.30E-01 | 0.14  | 4.44E-01 |
| RAET1E   | -0.85 | 8.02E-01 | -0.92 | 8.20E-01 | 0.13  | 4.47E-01 |
| INPP5A   | -0.85 | 8.02E-01 | -1.06 | 8.55E-01 | 0.46  | 3.23E-01 |
| CEP85    | -0.85 | 8.02E-01 | -1.50 | 9.33E-01 | -0.38 | 6.46E-01 |
| SIAE     | -0.85 | 8.02E-01 | -1.12 | 8.69E-01 | -0.78 | 7.82E-01 |
| GSDMC    | -0.85 | 8.02E-01 | -1.37 | 9.15E-01 | -0.40 | 6.56E-01 |
| NEURL2   | -0.85 | 8.02E-01 | -1.52 | 9.36E-01 | -0.20 | 5.79E-01 |
| NUDT8    | -0.85 | 8.02E-01 | -0.66 | 7.46E-01 | -0.52 | 7.00E-01 |
| NNAT     | -0.85 | 8.02E-01 | -2.92 | 9.98E-01 | -0.65 | 7.44E-01 |
| TRIM41   | -0.85 | 8.02E-01 | -1.43 | 9.23E-01 | -0.09 | 5.35E-01 |

|          |       |          |       |          |       |          |
|----------|-------|----------|-------|----------|-------|----------|
| C1QTNF7  | -0.85 | 8.02E-01 | 0.13  | 4.50E-01 | -0.68 | 7.53E-01 |
| LRP6     | -0.85 | 8.02E-01 | -1.14 | 8.74E-01 | 0.63  | 2.64E-01 |
| IGSF9    | -0.85 | 8.03E-01 | -1.73 | 9.58E-01 | 0.62  | 2.68E-01 |
| NLK      | -0.85 | 8.03E-01 | 0.31  | 3.80E-01 | -1.40 | 9.19E-01 |
| SDC4     | -0.85 | 8.03E-01 | -0.58 | 7.18E-01 | -1.27 | 8.98E-01 |
| USP49    | -0.85 | 8.03E-01 | -1.22 | 8.89E-01 | -1.24 | 8.92E-01 |
| LPIN1    | -0.85 | 8.03E-01 | -0.76 | 7.78E-01 | -1.03 | 8.47E-01 |
| PCDH12   | -0.85 | 8.03E-01 | 1.25  | 1.06E-01 | -0.61 | 7.28E-01 |
| CD83     | -0.85 | 8.03E-01 | 0.87  | 1.91E-01 | 0.80  | 2.11E-01 |
| TMEM132C | -0.85 | 8.03E-01 | -0.47 | 6.81E-01 | -0.89 | 8.12E-01 |
| CORT     | -0.85 | 8.03E-01 | 0.36  | 3.60E-01 | 1.61  | 5.39E-02 |
| ARF6     | -0.85 | 8.03E-01 | -1.70 | 9.56E-01 | -0.61 | 7.30E-01 |
| NNT      | -0.85 | 8.03E-01 | -0.75 | 7.75E-01 | -1.41 | 9.21E-01 |
| NMNAT2   | -0.85 | 8.03E-01 | 0.02  | 4.93E-01 | -0.07 | 5.29E-01 |
| TMOD1    | -0.85 | 8.03E-01 | -0.62 | 7.32E-01 | 0.90  | 1.85E-01 |
| C12orf49 | -0.85 | 8.03E-01 | 0.43  | 3.34E-01 | -0.58 | 7.18E-01 |
| FAM219B  | -0.85 | 8.03E-01 | -0.91 | 8.18E-01 | 0.32  | 3.76E-01 |
| NLRP8    | -0.85 | 8.03E-01 | 0.67  | 2.50E-01 | -0.91 | 8.19E-01 |
| SLC16A7  | -0.85 | 8.03E-01 | -0.60 | 7.26E-01 | 0.67  | 2.52E-01 |
| CHP1     | -0.85 | 8.03E-01 | -0.52 | 6.99E-01 | -1.68 | 9.53E-01 |
| TMEM106A | -0.85 | 8.03E-01 | -0.47 | 6.79E-01 | 0.30  | 3.81E-01 |
| PM20D2   | -0.85 | 8.03E-01 | 0.25  | 4.01E-01 | 1.10  | 1.36E-01 |
| RPTOR    | -0.85 | 8.03E-01 | 0.25  | 4.01E-01 | 0.04  | 4.86E-01 |
| ZFP36L2  | -0.85 | 8.03E-01 | -1.69 | 9.54E-01 | -0.47 | 6.80E-01 |
| MED23    | -0.85 | 8.03E-01 | -1.11 | 8.67E-01 | -1.25 | 8.94E-01 |
| DOC2A    | -0.85 | 8.03E-01 | -0.69 | 7.54E-01 | -0.08 | 5.33E-01 |
| RC3H2    | -0.85 | 8.03E-01 | -0.14 | 5.56E-01 | -2.21 | 9.86E-01 |
| GNAT1    | -0.85 | 8.04E-01 | -0.70 | 7.59E-01 | -1.34 | 9.10E-01 |
| FAM49B   | -0.85 | 8.04E-01 | -0.40 | 6.57E-01 | -0.89 | 8.13E-01 |
| ZNF461   | -0.86 | 8.04E-01 | -0.15 | 5.58E-01 | 0.14  | 4.43E-01 |
| SH2B3    | -0.86 | 8.04E-01 | -1.60 | 9.45E-01 | -0.97 | 8.35E-01 |



|         |       |          |       |          |       |          |
|---------|-------|----------|-------|----------|-------|----------|
| HHEX    | -0.86 | 8.04E-01 | -0.89 | 8.12E-01 | -1.24 | 8.92E-01 |
| PPM1M   | -0.86 | 8.04E-01 | -2.02 | 9.78E-01 | -0.24 | 5.96E-01 |
| CENPP   | -0.86 | 8.04E-01 | 0.27  | 3.92E-01 | -1.71 | 9.56E-01 |
| PYY     | -0.86 | 8.04E-01 | -0.31 | 6.22E-01 | -1.79 | 9.63E-01 |
| NFX1    | -0.86 | 8.04E-01 | 0.64  | 2.61E-01 | -0.24 | 5.93E-01 |
| MRTO4   | -0.86 | 8.04E-01 | 0.70  | 2.41E-01 | -0.58 | 7.20E-01 |
| CALR3   | -0.86 | 8.04E-01 | -0.66 | 7.45E-01 | -1.18 | 8.80E-01 |
| DUXA    | -0.86 | 8.04E-01 | 0.30  | 3.83E-01 | -1.11 | 8.67E-01 |
| TMPPE   | -0.86 | 8.04E-01 | -0.53 | 7.03E-01 | -0.53 | 7.04E-01 |
| ZNF546  | -0.86 | 8.04E-01 | -1.20 | 8.84E-01 | -0.14 | 5.55E-01 |
| TYMP    | -0.86 | 8.04E-01 | -0.99 | 8.39E-01 | -1.31 | 9.05E-01 |
| SMAGP   | -0.86 | 8.04E-01 | -0.81 | 7.92E-01 | 0.65  | 2.58E-01 |
| TIMM50  | -0.86 | 8.04E-01 | -0.56 | 7.13E-01 | 1.09  | 1.37E-01 |
| YIPF5   | -0.86 | 8.05E-01 | -0.69 | 7.54E-01 | -1.04 | 8.50E-01 |
| CDCA2   | -0.86 | 8.05E-01 | 0.28  | 3.90E-01 | -0.99 | 8.38E-01 |
| ZSWIM5  | -0.86 | 8.05E-01 | -0.05 | 5.21E-01 | -0.72 | 7.65E-01 |
| FOXA3   | -0.86 | 8.05E-01 | -0.69 | 7.55E-01 | -0.70 | 7.58E-01 |
| DNHD1   | -0.86 | 8.05E-01 | -0.42 | 6.62E-01 | -1.38 | 9.17E-01 |
| LTB4R2  | -0.86 | 8.05E-01 | -0.81 | 7.90E-01 | -2.21 | 9.86E-01 |
| PLEK    | -0.86 | 8.05E-01 | 0.37  | 3.55E-01 | -0.71 | 7.61E-01 |
| NEDD4   | -0.86 | 8.05E-01 | -1.27 | 8.98E-01 | -0.53 | 7.03E-01 |
| CES5A   | -0.86 | 8.05E-01 | 0.04  | 4.85E-01 | -1.98 | 9.76E-01 |
| CDK20   | -0.86 | 8.05E-01 | 0.34  | 3.66E-01 | -0.23 | 5.91E-01 |
| NPBWR1  | -0.86 | 8.05E-01 | 0.11  | 4.56E-01 | 0.29  | 3.87E-01 |
| ST3GAL1 | -0.86 | 8.05E-01 | -1.73 | 9.58E-01 | -0.23 | 5.92E-01 |
| ILF3    | -0.86 | 8.05E-01 | 0.33  | 3.70E-01 | -0.83 | 7.98E-01 |
| MT1E    | -0.86 | 8.05E-01 | 0.74  | 2.29E-01 | -0.51 | 6.95E-01 |
| CCNK    | -0.86 | 8.05E-01 | 0.33  | 3.69E-01 | -0.84 | 7.99E-01 |
| OAZ3    | -0.86 | 8.05E-01 | -0.08 | 5.30E-01 | -1.33 | 9.08E-01 |
| NR2C1   | -0.86 | 8.05E-01 | -0.12 | 5.48E-01 | -0.92 | 8.21E-01 |
| HAS3    | -0.86 | 8.05E-01 | -0.65 | 7.43E-01 | -0.56 | 7.11E-01 |

|          |       |          |       |          |       |          |
|----------|-------|----------|-------|----------|-------|----------|
| SIRPG    | -0.86 | 8.05E-01 | -0.62 | 7.32E-01 | 0.08  | 4.69E-01 |
| MPP3     | -0.86 | 8.05E-01 | -0.53 | 7.01E-01 | -1.28 | 9.00E-01 |
| IGSF10   | -0.86 | 8.06E-01 | 1.34  | 8.99E-02 | 0.12  | 4.50E-01 |
| DRAM2    | -0.86 | 8.06E-01 | -1.25 | 8.94E-01 | -0.43 | 6.67E-01 |
| EVI5     | -0.86 | 8.06E-01 | -1.01 | 8.44E-01 | -1.11 | 8.66E-01 |
| CD9      | -0.86 | 8.06E-01 | -0.86 | 8.06E-01 | -0.77 | 7.80E-01 |
| MTA2     | -0.86 | 8.06E-01 | 0.63  | 2.63E-01 | -0.07 | 5.26E-01 |
| S1PR1    | -0.86 | 8.06E-01 | -0.98 | 8.36E-01 | -1.18 | 8.82E-01 |
| SAP130   | -0.86 | 8.06E-01 | -0.46 | 6.78E-01 | -0.53 | 7.01E-01 |
| ZNF710   | -0.86 | 8.06E-01 | -0.29 | 6.15E-01 | -0.57 | 7.15E-01 |
| FXVD6    | -0.86 | 8.06E-01 | -0.66 | 7.46E-01 | -0.95 | 8.29E-01 |
| ASPN     | -0.86 | 8.06E-01 | 0.24  | 4.06E-01 | -1.32 | 9.06E-01 |
| MTRNR2L9 | -0.86 | 8.06E-01 | 0.20  | 4.22E-01 | -0.28 | 6.09E-01 |
| IRF2BP2  | -0.86 | 8.06E-01 | -0.64 | 7.40E-01 | -1.50 | 9.34E-01 |
| IAPP     | -0.86 | 8.06E-01 | -0.66 | 7.47E-01 | -2.46 | 9.93E-01 |
| GJA8     | -0.86 | 8.06E-01 | -0.92 | 8.21E-01 | -0.14 | 5.56E-01 |
| FGD3     | -0.86 | 8.06E-01 | -0.34 | 6.35E-01 | 0.72  | 2.36E-01 |
| ZNF727   | -0.86 | 8.06E-01 | -0.86 | 8.04E-01 | 0.69  | 2.45E-01 |
| AARS2    | -0.86 | 8.06E-01 | -0.47 | 6.80E-01 | -2.29 | 9.89E-01 |
| CLEC1A   | -0.86 | 8.06E-01 | 1.93  | 2.65E-02 | 1.67  | 4.73E-02 |
| GFPT1    | -0.86 | 8.06E-01 | 0.79  | 2.14E-01 | 0.70  | 2.43E-01 |
| SCN8A    | -0.87 | 8.07E-01 | -1.28 | 9.00E-01 | -1.11 | 8.67E-01 |
| MTTP     | -0.87 | 8.07E-01 | -1.35 | 9.11E-01 | -0.04 | 5.15E-01 |
| LCE3E    | -0.87 | 8.07E-01 | -0.99 | 8.38E-01 | -0.17 | 5.68E-01 |
| KRT74    | -0.87 | 8.07E-01 | -1.76 | 9.61E-01 | 0.40  | 3.45E-01 |
| RBL2     | -0.87 | 8.07E-01 | 0.81  | 2.08E-01 | 0.72  | 2.35E-01 |
| UNC45B   | -0.87 | 8.07E-01 | -0.75 | 7.73E-01 | 0.28  | 3.88E-01 |
| KRTDAP   | -0.87 | 8.07E-01 | -2.71 | 9.97E-01 | 0.26  | 3.98E-01 |
| S100A1   | -0.87 | 8.07E-01 | -0.96 | 8.32E-01 | -0.82 | 7.94E-01 |
| ACAD11   | -0.87 | 8.07E-01 | -0.17 | 5.66E-01 | -0.75 | 7.74E-01 |
| C1orf170 | -0.87 | 8.07E-01 | -0.99 | 8.39E-01 | -1.36 | 9.13E-01 |

|          |       |          |       |          |       |          |
|----------|-------|----------|-------|----------|-------|----------|
| NR4A2    | -0.87 | 8.07E-01 | 0.41  | 3.41E-01 | -1.16 | 8.77E-01 |
| C12orf4  | -0.87 | 8.07E-01 | 0.54  | 2.93E-01 | -0.10 | 5.39E-01 |
| HMMR     | -0.87 | 8.07E-01 | -0.69 | 7.56E-01 | -1.17 | 8.78E-01 |
| DHX57    | -0.87 | 8.08E-01 | -0.48 | 6.86E-01 | -0.60 | 7.24E-01 |
| CXCL3    | -0.87 | 8.08E-01 | -0.57 | 7.17E-01 | -0.11 | 5.44E-01 |
| RBP2     | -0.87 | 8.08E-01 | 1.79  | 3.67E-02 | 0.84  | 2.01E-01 |
| SLC1A5   | -0.87 | 8.08E-01 | -0.92 | 8.21E-01 | 1.20  | 1.15E-01 |
| CASQ2    | -0.87 | 8.08E-01 | -1.00 | 8.42E-01 | -0.42 | 6.64E-01 |
| TTC12    | -0.87 | 8.08E-01 | -1.43 | 9.24E-01 | -0.73 | 7.68E-01 |
| DTNBP1   | -0.87 | 8.08E-01 | -0.57 | 7.15E-01 | -0.91 | 8.20E-01 |
| AMIGO3   | -0.87 | 8.08E-01 | -1.33 | 9.08E-01 | 0.41  | 3.41E-01 |
| GMPPB    | -0.87 | 8.08E-01 | -1.33 | 9.08E-01 | 0.41  | 3.41E-01 |
| CHMP4B   | -0.87 | 8.08E-01 | 0.15  | 4.41E-01 | -0.70 | 7.57E-01 |
| SMR3B    | -0.87 | 8.08E-01 | -1.32 | 9.07E-01 | -0.79 | 7.85E-01 |
| CENPN    | -0.87 | 8.08E-01 | -1.31 | 9.06E-01 | -0.64 | 7.40E-01 |
| TMEM247  | -0.87 | 8.08E-01 | -1.16 | 8.76E-01 | -1.23 | 8.91E-01 |
| KCNK1    | -0.87 | 8.08E-01 | -1.86 | 9.69E-01 | -0.48 | 6.86E-01 |
| KCNIP1   | -0.87 | 8.08E-01 | -0.28 | 6.10E-01 | -0.92 | 8.22E-01 |
| ZNF439   | -0.87 | 8.08E-01 | -0.10 | 5.39E-01 | 1.35  | 8.86E-02 |
| ZNF778   | -0.87 | 8.08E-01 | -1.01 | 8.43E-01 | -1.42 | 9.22E-01 |
| ID2      | -0.87 | 8.08E-01 | -0.23 | 5.90E-01 | -0.35 | 6.36E-01 |
| RIC8B    | -0.87 | 8.08E-01 | 0.01  | 4.94E-01 | -0.61 | 7.28E-01 |
| SERPINB3 | -0.87 | 8.08E-01 | -2.61 | 9.96E-01 | -0.18 | 5.71E-01 |
| PARM1    | -0.87 | 8.08E-01 | 0.49  | 3.13E-01 | -1.09 | 8.62E-01 |
| ATF2     | -0.87 | 8.08E-01 | -0.68 | 7.52E-01 | -2.20 | 9.86E-01 |
| BCL2L14  | -0.87 | 8.09E-01 | -0.59 | 7.22E-01 | -0.06 | 5.24E-01 |
| THNSL1   | -0.87 | 8.09E-01 | 1.00  | 1.58E-01 | 1.65  | 4.99E-02 |
| C19orf18 | -0.87 | 8.09E-01 | -0.41 | 6.58E-01 | 0.53  | 2.97E-01 |
| TMEM194B | -0.87 | 8.09E-01 | -0.65 | 7.42E-01 | -0.24 | 5.97E-01 |
| PTRH2    | -0.87 | 8.09E-01 | -1.82 | 9.66E-01 | -0.47 | 6.82E-01 |
| MRPL33   | -0.87 | 8.09E-01 | -0.91 | 8.19E-01 | -0.40 | 6.54E-01 |

|              |       |          |       |          |       |          |
|--------------|-------|----------|-------|----------|-------|----------|
| CTSA         | -0.87 | 8.09E-01 | -0.98 | 8.37E-01 | -0.93 | 8.23E-01 |
| EIF3M        | -0.87 | 8.09E-01 | 1.04  | 1.49E-01 | 1.97  | 2.43E-02 |
| SFTPB        | -0.87 | 8.09E-01 | -1.53 | 9.38E-01 | 0.36  | 3.60E-01 |
| MTMR14       | -0.87 | 8.09E-01 | -0.45 | 6.72E-01 | 0.50  | 3.08E-01 |
| SRD5A1       | -0.87 | 8.09E-01 | -0.48 | 6.83E-01 | -1.48 | 9.31E-01 |
| IL12A        | -0.87 | 8.09E-01 | 0.15  | 4.39E-01 | -1.35 | 9.11E-01 |
| TMEM55B      | -0.87 | 8.09E-01 | -1.22 | 8.88E-01 | -1.04 | 8.51E-01 |
| RSPO3        | -0.88 | 8.09E-01 | 0.16  | 4.38E-01 | -0.38 | 6.50E-01 |
| UFC1         | -0.88 | 8.09E-01 | 1.39  | 8.25E-02 | 0.68  | 2.49E-01 |
| SUMO2        | -0.88 | 8.09E-01 | 0.35  | 3.65E-01 | -1.13 | 8.71E-01 |
| ZCCHC7       | -0.88 | 8.09E-01 | -1.52 | 9.36E-01 | -0.21 | 5.84E-01 |
| ISCA2        | -0.88 | 8.09E-01 | 1.50  | 6.66E-02 | 1.92  | 2.73E-02 |
| KCNT1        | -0.88 | 8.10E-01 | -1.97 | 9.76E-01 | 0.09  | 4.63E-01 |
| PSG2         | -0.88 | 8.10E-01 | 0.18  | 4.28E-01 | 0.35  | 3.64E-01 |
| NXPH4        | -0.88 | 8.10E-01 | -0.95 | 8.28E-01 | -0.96 | 8.31E-01 |
| OR51Q1       | -0.88 | 8.10E-01 | 0.43  | 3.33E-01 | 0.70  | 2.42E-01 |
| ZNF484       | -0.88 | 8.10E-01 | -1.52 | 9.36E-01 | -1.07 | 8.57E-01 |
| SLC43A2      | -0.88 | 8.10E-01 | -1.05 | 8.54E-01 | 0.91  | 1.82E-01 |
| ADORA1       | -0.88 | 8.10E-01 | -0.56 | 7.13E-01 | -0.66 | 7.46E-01 |
| RPS16        | -0.88 | 8.10E-01 | -0.37 | 6.44E-01 | 0.95  | 1.71E-01 |
| PRKAB2       | -0.88 | 8.10E-01 | 1.35  | 8.79E-02 | 1.37  | 8.49E-02 |
| PAGR1        | -0.88 | 8.10E-01 | -0.71 | 7.61E-01 | -1.09 | 8.63E-01 |
| FAM86A       | -0.88 | 8.10E-01 | 0.09  | 4.63E-01 | 0.42  | 3.36E-01 |
| NLE1         | -0.88 | 8.10E-01 | -2.27 | 9.88E-01 | -0.55 | 7.08E-01 |
| TOMM40       | -0.88 | 8.10E-01 | -0.89 | 8.12E-01 | -1.32 | 9.07E-01 |
| C11orf42     | -0.88 | 8.10E-01 | -0.67 | 7.48E-01 | -0.44 | 6.69E-01 |
| TMEM69       | -0.88 | 8.10E-01 | 0.67  | 2.52E-01 | 0.40  | 3.46E-01 |
| PKP2         | -0.88 | 8.10E-01 | -0.68 | 7.53E-01 | -0.95 | 8.30E-01 |
| TMEM56-RWDD3 | -0.88 | 8.10E-01 | 0.07  | 4.74E-01 | -0.57 | 7.14E-01 |
| PUS7L        | -0.88 | 8.10E-01 | 0.14  | 4.46E-01 | -1.25 | 8.95E-01 |
| FBXO17       | -0.88 | 8.10E-01 | -0.39 | 6.53E-01 | -1.15 | 8.75E-01 |

|           |       |          |       |          |       |          |
|-----------|-------|----------|-------|----------|-------|----------|
| ANKRD34C  | -0.88 | 8.10E-01 | -0.58 | 7.19E-01 | -0.70 | 7.59E-01 |
| LYPD1     | -0.88 | 8.11E-01 | -0.48 | 6.86E-01 | -1.41 | 9.21E-01 |
| PRDM5     | -0.88 | 8.11E-01 | -0.72 | 7.63E-01 | -1.04 | 8.50E-01 |
| PRR23C    | -0.88 | 8.11E-01 | -0.33 | 6.30E-01 | 0.50  | 3.09E-01 |
| LPHN1     | -0.88 | 8.11E-01 | -0.38 | 6.47E-01 | -1.17 | 8.79E-01 |
| TASP1     | -0.88 | 8.11E-01 | -1.43 | 9.23E-01 | -1.07 | 8.58E-01 |
| SLC9A3    | -0.88 | 8.11E-01 | 0.16  | 4.35E-01 | -0.96 | 8.32E-01 |
| DNM2      | -0.88 | 8.11E-01 | -0.21 | 5.85E-01 | -0.21 | 5.85E-01 |
| RNF115    | -0.88 | 8.11E-01 | -0.57 | 7.16E-01 | -1.48 | 9.31E-01 |
| OR4C13    | -0.88 | 8.11E-01 | -1.19 | 8.84E-01 | -0.49 | 6.87E-01 |
| CBX1      | -0.88 | 8.11E-01 | 0.93  | 1.76E-01 | 1.76  | 3.93E-02 |
| NTSR2     | -0.88 | 8.11E-01 | 0.80  | 2.11E-01 | -0.50 | 6.93E-01 |
| ZCCHC8    | -0.88 | 8.11E-01 | -0.32 | 6.25E-01 | -0.82 | 7.93E-01 |
| TMEM63A   | -0.88 | 8.11E-01 | -1.29 | 9.01E-01 | 0.40  | 3.46E-01 |
| TCEANC2   | -0.88 | 8.11E-01 | 0.04  | 4.83E-01 | -0.31 | 6.22E-01 |
| GRB2      | -0.88 | 8.11E-01 | -0.43 | 6.65E-01 | 0.41  | 3.42E-01 |
| ZFYVE27   | -0.88 | 8.11E-01 | -1.53 | 9.38E-01 | -0.27 | 6.06E-01 |
| CYB5R4    | -0.88 | 8.11E-01 | -0.34 | 6.31E-01 | 0.77  | 2.21E-01 |
| IGFBPL1   | -0.88 | 8.11E-01 | 0.00  | 4.99E-01 | -1.39 | 9.18E-01 |
| XPA       | -0.88 | 8.11E-01 | -0.67 | 7.49E-01 | -0.04 | 5.15E-01 |
| AP1G2     | -0.88 | 8.11E-01 | -0.17 | 5.66E-01 | -0.51 | 6.95E-01 |
| TRAPPC2P1 | -0.88 | 8.11E-01 | -1.47 | 9.29E-01 | 0.42  | 3.36E-01 |
| SEMA3G    | -0.88 | 8.11E-01 | 0.25  | 4.01E-01 | -0.56 | 7.12E-01 |
| IGFBP4    | -0.88 | 8.11E-01 | -0.84 | 8.00E-01 | -0.05 | 5.18E-01 |
| C1orf147  | -0.88 | 8.12E-01 | -1.68 | 9.54E-01 | -0.31 | 6.22E-01 |
| SNCA      | -0.88 | 8.12E-01 | -1.77 | 9.62E-01 | -0.34 | 6.34E-01 |
| G3BP2     | -0.88 | 8.12E-01 | 1.11  | 1.34E-01 | 2.03  | 2.13E-02 |
| PPAPDC3   | -0.88 | 8.12E-01 | -0.85 | 8.01E-01 | -0.88 | 8.10E-01 |
| OR9Q2     | -0.88 | 8.12E-01 | -0.36 | 6.40E-01 | -1.55 | 9.39E-01 |
| SIRPB1    | -0.88 | 8.12E-01 | 0.13  | 4.47E-01 | -1.94 | 9.74E-01 |
| PRICKLE4  | -0.88 | 8.12E-01 | -0.73 | 7.68E-01 | -1.72 | 9.57E-01 |

|          |       |          |       |          |       |          |
|----------|-------|----------|-------|----------|-------|----------|
| MLF1     | -0.89 | 8.12E-01 | 0.48  | 3.14E-01 | -0.98 | 8.36E-01 |
| ECHDC3   | -0.89 | 8.12E-01 | -0.49 | 6.89E-01 | -0.62 | 7.32E-01 |
| SPAG4    | -0.89 | 8.12E-01 | -2.94 | 9.98E-01 | -0.48 | 6.84E-01 |
| LRRC16A  | -0.89 | 8.12E-01 | -0.53 | 7.02E-01 | -0.68 | 7.52E-01 |
| GRIN2C   | -0.89 | 8.12E-01 | 0.04  | 4.84E-01 | -0.77 | 7.79E-01 |
| EVI5L    | -0.89 | 8.12E-01 | -0.89 | 8.14E-01 | 0.75  | 2.27E-01 |
| PNMT     | -0.89 | 8.12E-01 | 0.14  | 4.43E-01 | -1.01 | 8.43E-01 |
| PFKFB4   | -0.89 | 8.13E-01 | 0.75  | 2.25E-01 | 0.23  | 4.11E-01 |
| NPAT     | -0.89 | 8.13E-01 | -0.69 | 7.56E-01 | -0.81 | 7.91E-01 |
| ZNF682   | -0.89 | 8.13E-01 | -0.60 | 7.26E-01 | -0.99 | 8.39E-01 |
| OR2L8    | -0.89 | 8.13E-01 | -0.83 | 7.97E-01 | -1.50 | 9.33E-01 |
| DENND2D  | -0.89 | 8.13E-01 | -1.29 | 9.02E-01 | -0.92 | 8.22E-01 |
| FBLN1    | -0.89 | 8.13E-01 | -1.29 | 9.02E-01 | -0.39 | 6.51E-01 |
| SFRP1    | -0.89 | 8.13E-01 | -0.69 | 7.56E-01 | -0.32 | 6.26E-01 |
| ZDHHHC17 | -0.89 | 8.13E-01 | -0.79 | 7.86E-01 | -0.37 | 6.44E-01 |
| KCNK17   | -0.89 | 8.13E-01 | -0.88 | 8.11E-01 | -0.40 | 6.56E-01 |
| IGFALS   | -0.89 | 8.13E-01 | -0.44 | 6.71E-01 | -0.06 | 5.23E-01 |
| OR1S1    | -0.89 | 8.13E-01 | -0.70 | 7.58E-01 | -0.02 | 5.10E-01 |
| COG7     | -0.89 | 8.13E-01 | 0.58  | 2.80E-01 | 0.57  | 2.85E-01 |
| EEF1A2   | -0.89 | 8.13E-01 | -1.14 | 8.72E-01 | -0.60 | 7.27E-01 |
| MRE11A   | -0.89 | 8.14E-01 | -0.86 | 8.06E-01 | -0.47 | 6.80E-01 |
| ANO1     | -0.89 | 8.14E-01 | -1.56 | 9.40E-01 | 0.11  | 4.56E-01 |
| KCTD13   | -0.89 | 8.14E-01 | -0.89 | 8.14E-01 | -0.36 | 6.42E-01 |
| CEBPA    | -0.89 | 8.14E-01 | 0.22  | 4.13E-01 | -0.20 | 5.78E-01 |
| RMND5A   | -0.89 | 8.14E-01 | 0.05  | 4.80E-01 | 1.07  | 1.43E-01 |
| TMEM74B  | -0.89 | 8.14E-01 | 0.63  | 2.63E-01 | 1.95  | 2.57E-02 |
| MNDA     | -0.89 | 8.14E-01 | -0.91 | 8.20E-01 | -1.28 | 9.00E-01 |
| NEBL     | -0.89 | 8.14E-01 | -0.58 | 7.20E-01 | -0.20 | 5.78E-01 |
| STMN1    | -0.89 | 8.14E-01 | -0.96 | 8.30E-01 | -0.36 | 6.42E-01 |
| TTC7A    | -0.89 | 8.14E-01 | -1.02 | 8.46E-01 | -1.12 | 8.69E-01 |
| FGFR3    | -0.89 | 8.14E-01 | -0.46 | 6.77E-01 | -0.70 | 7.59E-01 |

|          |       |          |       |          |       |          |
|----------|-------|----------|-------|----------|-------|----------|
| POLR1E   | -0.89 | 8.14E-01 | -0.59 | 7.22E-01 | -1.41 | 9.21E-01 |
| TMEM88   | -0.89 | 8.14E-01 | -0.18 | 5.71E-01 | 0.83  | 2.02E-01 |
| AHRR     | -0.89 | 8.14E-01 | 0.12  | 4.52E-01 | 0.04  | 4.82E-01 |
| GXYLT1   | -0.89 | 8.14E-01 | 0.17  | 4.31E-01 | -1.12 | 8.69E-01 |
| FAM149B1 | -0.89 | 8.14E-01 | -0.96 | 8.32E-01 | -0.66 | 7.44E-01 |
| RAPGEF4  | -0.89 | 8.14E-01 | -1.18 | 8.82E-01 | -0.70 | 7.57E-01 |
| ENO3     | -0.89 | 8.14E-01 | 0.75  | 2.27E-01 | 1.23  | 1.09E-01 |
| WDFY3    | -0.89 | 8.14E-01 | -0.20 | 5.80E-01 | -0.20 | 5.78E-01 |
| ILDR1    | -0.89 | 8.15E-01 | -0.87 | 8.07E-01 | -0.02 | 5.06E-01 |
| TEKT1    | -0.89 | 8.15E-01 | 1.07  | 1.43E-01 | -0.04 | 5.15E-01 |
| SLC24A5  | -0.89 | 8.15E-01 | 0.20  | 4.20E-01 | 0.80  | 2.12E-01 |
| RBM18    | -0.90 | 8.15E-01 | -0.61 | 7.29E-01 | -0.53 | 7.01E-01 |
| DNAJC5G  | -0.90 | 8.15E-01 | -0.94 | 8.25E-01 | 0.15  | 4.40E-01 |
| SARS2    | -0.90 | 8.15E-01 | -0.46 | 6.77E-01 | -1.78 | 9.63E-01 |
| PPP1R13L | -0.90 | 8.15E-01 | -0.31 | 6.23E-01 | -0.25 | 5.99E-01 |
| EREG     | -0.90 | 8.15E-01 | -0.44 | 6.69E-01 | 0.09  | 4.63E-01 |
| CTH      | -0.90 | 8.15E-01 | -0.92 | 8.22E-01 | 0.00  | 5.00E-01 |
| SREK1IP1 | -0.90 | 8.15E-01 | -1.47 | 9.29E-01 | -0.33 | 6.29E-01 |
| GOLGA7   | -0.90 | 8.15E-01 | 0.71  | 2.39E-01 | -0.06 | 5.25E-01 |
| ECM2     | -0.90 | 8.15E-01 | 0.25  | 4.01E-01 | -1.66 | 9.51E-01 |
| ALK      | -0.90 | 8.15E-01 | -1.10 | 8.65E-01 | -0.73 | 7.68E-01 |
| C1orf122 | -0.90 | 8.15E-01 | -1.73 | 9.58E-01 | -0.74 | 7.69E-01 |
| GALNTL6  | -0.90 | 8.15E-01 | -0.59 | 7.22E-01 | -1.64 | 9.50E-01 |
| ADAM7    | -0.90 | 8.15E-01 | -1.64 | 9.50E-01 | -0.06 | 5.24E-01 |
| RPL26L1  | -0.90 | 8.15E-01 | -0.38 | 6.46E-01 | 0.02  | 4.91E-01 |
| SGIP1    | -0.90 | 8.15E-01 | 0.59  | 2.77E-01 | 0.93  | 1.76E-01 |
| CAPSL    | -0.90 | 8.15E-01 | 0.53  | 2.99E-01 | 0.78  | 2.17E-01 |
| PLAGL1   | -0.90 | 8.15E-01 | -0.03 | 5.11E-01 | 0.09  | 4.66E-01 |
| POLD1    | -0.90 | 8.16E-01 | 0.05  | 4.78E-01 | -0.14 | 5.55E-01 |
| UBE2Z    | -0.90 | 8.16E-01 | -1.23 | 8.91E-01 | -1.30 | 9.03E-01 |
| FAM209A  | -0.90 | 8.16E-01 | -1.63 | 9.48E-01 | 0.27  | 3.92E-01 |

|            |       |          |       |          |       |          |
|------------|-------|----------|-------|----------|-------|----------|
| SV2C       | -0.90 | 8.16E-01 | -0.84 | 8.01E-01 | -0.57 | 7.14E-01 |
| IKZF3      | -0.90 | 8.16E-01 | -0.87 | 8.09E-01 | -1.21 | 8.87E-01 |
| RIPPLY2    | -0.90 | 8.16E-01 | -0.21 | 5.82E-01 | 0.73  | 2.32E-01 |
| DQX1       | -0.90 | 8.16E-01 | -1.88 | 9.70E-01 | 0.19  | 4.25E-01 |
| CXCL16     | -0.90 | 8.16E-01 | -0.67 | 7.48E-01 | 0.63  | 2.63E-01 |
| C19orf84   | -0.90 | 8.16E-01 | -0.23 | 5.90E-01 | -0.33 | 6.29E-01 |
| LRR1       | -0.90 | 8.16E-01 | -0.89 | 8.14E-01 | -0.67 | 7.48E-01 |
| ACP6       | -0.90 | 8.16E-01 | -0.14 | 5.56E-01 | 0.30  | 3.82E-01 |
| PDCL2      | -0.90 | 8.17E-01 | -1.07 | 8.57E-01 | 0.07  | 4.74E-01 |
| HELZ       | -0.90 | 8.17E-01 | -1.25 | 8.95E-01 | -0.56 | 7.12E-01 |
| CAMSAP2    | -0.90 | 8.17E-01 | -0.09 | 5.35E-01 | 0.89  | 1.87E-01 |
| GLIPR1L2   | -0.90 | 8.17E-01 | -0.82 | 7.93E-01 | -0.64 | 7.37E-01 |
| PPHLN1     | -0.90 | 8.17E-01 | 0.04  | 4.85E-01 | -0.43 | 6.66E-01 |
| CPLX4      | -0.90 | 8.17E-01 | -0.15 | 5.60E-01 | -1.66 | 9.51E-01 |
| TBC1D17    | -0.90 | 8.17E-01 | 0.63  | 2.65E-01 | -0.32 | 6.24E-01 |
| FKBP1A     | -0.90 | 8.17E-01 | -0.51 | 6.95E-01 | -1.17 | 8.78E-01 |
| CENPF      | -0.90 | 8.17E-01 | 1.02  | 1.54E-01 | -0.33 | 6.30E-01 |
| ACR        | -0.90 | 8.17E-01 | -0.52 | 6.99E-01 | -2.54 | 9.94E-01 |
| SEC14L2    | -0.90 | 8.17E-01 | -0.38 | 6.47E-01 | -1.16 | 8.76E-01 |
| RWDD1      | -0.90 | 8.17E-01 | 1.01  | 1.56E-01 | -0.52 | 7.00E-01 |
| AC022431.2 | -0.90 | 8.17E-01 | -1.03 | 8.49E-01 | -1.56 | 9.41E-01 |
| ZC3H7B     | -0.90 | 8.17E-01 | -0.44 | 6.70E-01 | -0.75 | 7.72E-01 |
| PRELID1    | -0.90 | 8.17E-01 | 0.10  | 4.59E-01 | -0.29 | 6.16E-01 |
| WDR3       | -0.91 | 8.17E-01 | -0.10 | 5.38E-01 | -1.46 | 9.28E-01 |
| PDCD6      | -0.91 | 8.17E-01 | 0.08  | 4.68E-01 | -0.03 | 5.11E-01 |
| ZNF812     | -0.91 | 8.17E-01 | -0.84 | 8.01E-01 | -0.19 | 5.77E-01 |
| SRSF6      | -0.91 | 8.17E-01 | 0.46  | 3.24E-01 | -1.03 | 8.48E-01 |
| MAGOH      | -0.91 | 8.17E-01 | 1.33  | 9.14E-02 | 1.07  | 1.41E-01 |
| CHAMP1     | -0.91 | 8.17E-01 | 0.40  | 3.44E-01 | 0.92  | 1.79E-01 |
| CHRNA      | -0.91 | 8.17E-01 | -1.36 | 9.13E-01 | -0.52 | 6.97E-01 |
| CMA1       | -0.91 | 8.17E-01 | -0.43 | 6.66E-01 | -1.54 | 9.38E-01 |



|         |       |          |       |          |       |          |
|---------|-------|----------|-------|----------|-------|----------|
| LRP3    | -0.91 | 8.17E-01 | -0.62 | 7.33E-01 | -1.21 | 8.86E-01 |
| RBFA    | -0.91 | 8.17E-01 | -0.69 | 7.56E-01 | -0.10 | 5.39E-01 |
| TULP1   | -0.91 | 8.17E-01 | -1.78 | 9.63E-01 | 0.26  | 3.96E-01 |
| NTF3    | -0.91 | 8.17E-01 | -1.52 | 9.36E-01 | -0.83 | 7.97E-01 |
| TNFSF15 | -0.91 | 8.17E-01 | -0.50 | 6.91E-01 | -1.12 | 8.69E-01 |
| ADAMTS4 | -0.91 | 8.18E-01 | -0.18 | 5.70E-01 | -0.47 | 6.81E-01 |
| ZNF808  | -0.91 | 8.18E-01 | 0.83  | 2.04E-01 | 1.46  | 7.16E-02 |
| KLHL20  | -0.91 | 8.18E-01 | 0.34  | 3.69E-01 | -0.77 | 7.78E-01 |
| LENG1   | -0.91 | 8.18E-01 | -2.52 | 9.94E-01 | 0.31  | 3.77E-01 |
| C4BPB   | -0.91 | 8.18E-01 | -1.27 | 8.97E-01 | -0.79 | 7.86E-01 |
| STON2   | -0.91 | 8.18E-01 | 0.27  | 3.92E-01 | -1.61 | 9.47E-01 |
| GCNT7   | -0.91 | 8.18E-01 | -1.58 | 9.42E-01 | 0.14  | 4.46E-01 |
| KRT14   | -0.91 | 8.18E-01 | -0.47 | 6.81E-01 | -0.86 | 8.05E-01 |
| RPH3A   | -0.91 | 8.18E-01 | -0.69 | 7.56E-01 | -0.09 | 5.36E-01 |
| HTR3D   | -0.91 | 8.18E-01 | 0.58  | 2.81E-01 | 0.63  | 2.65E-01 |
| METTL2A | -0.91 | 8.18E-01 | -0.16 | 5.65E-01 | 0.26  | 3.97E-01 |
| OR10H3  | -0.91 | 8.18E-01 | -0.45 | 6.74E-01 | -1.25 | 8.94E-01 |
| LMTK2   | -0.91 | 8.18E-01 | -0.42 | 6.64E-01 | -0.46 | 6.76E-01 |
| ZNF354B | -0.91 | 8.18E-01 | 1.18  | 1.18E-01 | 0.74  | 2.29E-01 |
| WNT3A   | -0.91 | 8.18E-01 | -0.42 | 6.61E-01 | -0.82 | 7.93E-01 |
| PCGF5   | -0.91 | 8.18E-01 | 0.01  | 4.96E-01 | -0.76 | 7.77E-01 |
| CLK2    | -0.91 | 8.18E-01 | -0.21 | 5.83E-01 | -0.43 | 6.67E-01 |
| EEF1G   | -0.91 | 8.18E-01 | 0.47  | 3.18E-01 | -0.01 | 5.06E-01 |
| CD69    | -0.91 | 8.18E-01 | 0.23  | 4.09E-01 | 0.09  | 4.64E-01 |
| CES3    | -0.91 | 8.19E-01 | -1.36 | 9.12E-01 | 1.51  | 6.56E-02 |
| PHAX    | -0.91 | 8.19E-01 | -0.80 | 7.89E-01 | -0.09 | 5.36E-01 |
| IL26    | -0.91 | 8.19E-01 | -1.40 | 9.19E-01 | -1.49 | 9.33E-01 |
| PTEN    | -0.91 | 8.19E-01 | -0.66 | 7.44E-01 | -1.46 | 9.28E-01 |
| ZNF665  | -0.91 | 8.19E-01 | -1.21 | 8.88E-01 | -0.90 | 8.15E-01 |
| RRP8    | -0.91 | 8.19E-01 | -0.61 | 7.30E-01 | 0.73  | 2.32E-01 |
| TNPO1   | -0.91 | 8.19E-01 | -0.39 | 6.52E-01 | -0.80 | 7.89E-01 |

|          |       |          |       |          |       |          |
|----------|-------|----------|-------|----------|-------|----------|
| DDX60    | -0.91 | 8.19E-01 | 0.84  | 2.02E-01 | -0.46 | 6.78E-01 |
| PPIA     | -0.91 | 8.19E-01 | -1.22 | 8.89E-01 | 0.05  | 4.78E-01 |
| CANX     | -0.91 | 8.19E-01 | -0.29 | 6.15E-01 | -2.04 | 9.80E-01 |
| HNRNPK   | -0.91 | 8.19E-01 | 0.37  | 3.56E-01 | 2.33  | 9.93E-03 |
| TINAG    | -0.91 | 8.19E-01 | -1.60 | 9.45E-01 | -1.11 | 8.67E-01 |
| INTS10   | -0.91 | 8.19E-01 | 1.62  | 5.30E-02 | 0.50  | 3.09E-01 |
| PXDNL    | -0.91 | 8.19E-01 | -0.87 | 8.08E-01 | -0.51 | 6.94E-01 |
| S1PR5    | -0.91 | 8.20E-01 | -0.14 | 5.58E-01 | -0.69 | 7.56E-01 |
| CCDC11   | -0.91 | 8.20E-01 | 0.30  | 3.81E-01 | -0.08 | 5.32E-01 |
| SPOCK3   | -0.91 | 8.20E-01 | -1.37 | 9.15E-01 | -0.16 | 5.64E-01 |
| PGAP2    | -0.91 | 8.20E-01 | 0.01  | 4.95E-01 | -0.49 | 6.88E-01 |
| MZB1     | -0.91 | 8.20E-01 | -0.25 | 6.01E-01 | -0.84 | 8.00E-01 |
| ECHDC1   | -0.91 | 8.20E-01 | -0.88 | 8.11E-01 | -0.20 | 5.79E-01 |
| ULBP2    | -0.91 | 8.20E-01 | -0.69 | 7.54E-01 | -0.82 | 7.94E-01 |
| TBC1D22A | -0.91 | 8.20E-01 | -0.46 | 6.78E-01 | 0.88  | 1.90E-01 |
| FMNL1    | -0.91 | 8.20E-01 | -2.00 | 9.78E-01 | -0.74 | 7.70E-01 |
| INCA1    | -0.92 | 8.20E-01 | 0.87  | 1.91E-01 | 0.52  | 3.00E-01 |
| PRR19    | -0.92 | 8.20E-01 | -0.36 | 6.42E-01 | 0.00  | 4.99E-01 |
| RNF185   | -0.92 | 8.20E-01 | -1.07 | 8.58E-01 | -0.88 | 8.09E-01 |
| PSMF1    | -0.92 | 8.20E-01 | -0.97 | 8.35E-01 | -1.45 | 9.26E-01 |
| FAM84B   | -0.92 | 8.20E-01 | 0.24  | 4.05E-01 | -0.28 | 6.09E-01 |
| UGT1A9   | -0.92 | 8.20E-01 | -0.53 | 7.02E-01 | -0.24 | 5.94E-01 |
| CSHL1    | -0.92 | 8.20E-01 | -0.60 | 7.25E-01 | -1.09 | 8.61E-01 |
| CYP4F31P | -0.92 | 8.20E-01 | -0.32 | 6.25E-01 | 0.18  | 4.29E-01 |
| L3MBTL4  | -0.92 | 8.20E-01 | -0.55 | 7.09E-01 | -1.35 | 9.12E-01 |
| DLEC1    | -0.92 | 8.20E-01 | -0.68 | 7.52E-01 | -0.51 | 6.96E-01 |
| ARFGAP3  | -0.92 | 8.20E-01 | -0.42 | 6.62E-01 | -0.24 | 5.95E-01 |
| C1orf109 | -0.92 | 8.20E-01 | -0.73 | 7.67E-01 | -0.09 | 5.36E-01 |
| CNOT8    | -0.92 | 8.20E-01 | 0.26  | 3.98E-01 | 0.78  | 2.17E-01 |
| POMT1    | -0.92 | 8.20E-01 | 0.78  | 2.17E-01 | 1.82  | 3.48E-02 |
| TM9SF4   | -0.92 | 8.20E-01 | 0.93  | 1.77E-01 | 2.21  | 1.35E-02 |

|            |       |          |       |          |       |          |
|------------|-------|----------|-------|----------|-------|----------|
| ESF1       | -0.92 | 8.20E-01 | -1.08 | 8.60E-01 | -0.02 | 5.08E-01 |
| PLXDC2     | -0.92 | 8.20E-01 | -0.06 | 5.23E-01 | -0.09 | 5.38E-01 |
| ACAP2      | -0.92 | 8.21E-01 | -0.25 | 5.98E-01 | -0.06 | 5.25E-01 |
| GFI1B      | -0.92 | 8.21E-01 | 0.06  | 4.78E-01 | -0.05 | 5.21E-01 |
| C1orf192   | -0.92 | 8.21E-01 | -0.50 | 6.91E-01 | -0.71 | 7.62E-01 |
| LOH12CR2   | -0.92 | 8.21E-01 | -0.95 | 8.30E-01 | -1.93 | 9.73E-01 |
| ABHD17C    | -0.92 | 8.21E-01 | -0.03 | 5.12E-01 | 1.09  | 1.38E-01 |
| RASSF4     | -0.92 | 8.21E-01 | 0.14  | 4.46E-01 | -0.63 | 7.37E-01 |
| MROH9      | -0.92 | 8.21E-01 | 0.72  | 2.35E-01 | -0.73 | 7.67E-01 |
| NCKAP1     | -0.92 | 8.21E-01 | -1.57 | 9.41E-01 | -0.86 | 8.04E-01 |
| DYSF       | -0.92 | 8.21E-01 | -0.42 | 6.62E-01 | 0.92  | 1.78E-01 |
| HOXB2      | -0.92 | 8.21E-01 | 0.53  | 2.97E-01 | 0.93  | 1.76E-01 |
| REG1A      | -0.92 | 8.21E-01 | -0.76 | 7.78E-01 | -0.30 | 6.16E-01 |
| SENP7      | -0.92 | 8.21E-01 | 0.67  | 2.52E-01 | -0.09 | 5.37E-01 |
| CDH11      | -0.92 | 8.21E-01 | 0.08  | 4.67E-01 | -2.29 | 9.89E-01 |
| C16orf90   | -0.92 | 8.21E-01 | 0.39  | 3.48E-01 | -0.57 | 7.16E-01 |
| CXXC1      | -0.92 | 8.22E-01 | -0.08 | 5.31E-01 | -1.13 | 8.70E-01 |
| ZNF486     | -0.92 | 8.22E-01 | -1.20 | 8.84E-01 | -0.90 | 8.16E-01 |
| NACAD      | -0.92 | 8.22E-01 | 1.38  | 8.35E-02 | 0.97  | 1.65E-01 |
| C19orf53   | -0.92 | 8.22E-01 | 0.08  | 4.66E-01 | 0.14  | 4.46E-01 |
| FHL5       | -0.92 | 8.22E-01 | -0.53 | 7.03E-01 | 0.35  | 3.61E-01 |
| GLTP       | -0.92 | 8.22E-01 | -1.39 | 9.18E-01 | -0.39 | 6.53E-01 |
| ANKRD13A   | -0.92 | 8.22E-01 | -1.59 | 9.44E-01 | -0.68 | 7.53E-01 |
| AVPR1B     | -0.92 | 8.22E-01 | -0.76 | 7.77E-01 | -0.10 | 5.41E-01 |
| ST6GALNAC5 | -0.92 | 8.22E-01 | -0.54 | 7.06E-01 | -0.17 | 5.67E-01 |
| MAP6D1     | -0.92 | 8.22E-01 | 1.00  | 1.59E-01 | 2.17  | 1.48E-02 |
| PKD1       | -0.92 | 8.22E-01 | -0.91 | 8.19E-01 | 0.02  | 4.92E-01 |
| TRPM8      | -0.92 | 8.22E-01 | -0.29 | 6.13E-01 | -0.68 | 7.51E-01 |
| IRX1       | -0.93 | 8.23E-01 | -0.04 | 5.15E-01 | 0.69  | 2.46E-01 |
| MS4A15     | -0.93 | 8.23E-01 | -0.16 | 5.65E-01 | -0.24 | 5.95E-01 |
| ST8SIA1    | -0.93 | 8.23E-01 | -1.06 | 8.57E-01 | -1.33 | 9.09E-01 |

|              |       |          |       |          |       |          |
|--------------|-------|----------|-------|----------|-------|----------|
| PSAT1        | -0.93 | 8.23E-01 | -1.29 | 9.01E-01 | -0.14 | 5.56E-01 |
| RFC3         | -0.93 | 8.23E-01 | 0.08  | 4.68E-01 | 1.70  | 4.44E-02 |
| E2F8         | -0.93 | 8.23E-01 | -0.36 | 6.42E-01 | -2.39 | 9.91E-01 |
| KLF11        | -0.93 | 8.23E-01 | -0.87 | 8.07E-01 | -1.07 | 8.58E-01 |
| C2orf54      | -0.93 | 8.23E-01 | 0.61  | 2.72E-01 | 2.06  | 1.98E-02 |
| XCL1         | -0.93 | 8.23E-01 | -0.55 | 7.08E-01 | -0.09 | 5.36E-01 |
| HBD          | -0.93 | 8.23E-01 | -0.85 | 8.02E-01 | -1.38 | 9.17E-01 |
| RIAD1        | -0.93 | 8.23E-01 | 0.09  | 4.62E-01 | -1.45 | 9.27E-01 |
| DENND6A      | -0.93 | 8.23E-01 | -0.26 | 6.03E-01 | 0.00  | 4.98E-01 |
| ABCC6        | -0.93 | 8.24E-01 | 0.89  | 1.88E-01 | -1.15 | 8.76E-01 |
| SCO2         | -0.93 | 8.24E-01 | -1.09 | 8.63E-01 | -0.57 | 7.15E-01 |
| SDHAF2       | -0.93 | 8.24E-01 | -0.32 | 6.26E-01 | -0.90 | 8.15E-01 |
| SERPINC1     | -0.93 | 8.24E-01 | 0.76  | 2.23E-01 | 0.32  | 3.76E-01 |
| TMEM44       | -0.93 | 8.24E-01 | 1.21  | 1.13E-01 | 0.35  | 3.64E-01 |
| PRDM16       | -0.93 | 8.24E-01 | -0.39 | 6.53E-01 | -0.49 | 6.88E-01 |
| PTPN18       | -0.93 | 8.24E-01 | -0.10 | 5.38E-01 | 0.26  | 3.98E-01 |
| NCAPH2       | -0.93 | 8.24E-01 | -0.69 | 7.56E-01 | 0.76  | 2.24E-01 |
| NEK7         | -0.93 | 8.24E-01 | 0.26  | 3.97E-01 | 1.84  | 3.32E-02 |
| RPAP3        | -0.93 | 8.24E-01 | 0.48  | 3.17E-01 | -1.01 | 8.44E-01 |
| PPM1K        | -0.93 | 8.24E-01 | -0.33 | 6.29E-01 | -0.39 | 6.53E-01 |
| PCSK9        | -0.93 | 8.24E-01 | -1.01 | 8.45E-01 | -0.57 | 7.15E-01 |
| PCED1A       | -0.93 | 8.24E-01 | -1.59 | 9.44E-01 | -1.05 | 8.54E-01 |
| PPM1D        | -0.93 | 8.24E-01 | -1.57 | 9.42E-01 | -0.71 | 7.62E-01 |
| CHRM3        | -0.93 | 8.24E-01 | -0.83 | 7.98E-01 | -1.72 | 9.57E-01 |
| GHSR         | -0.93 | 8.24E-01 | 0.53  | 2.97E-01 | -0.06 | 5.23E-01 |
| TRAP1        | -0.93 | 8.24E-01 | -0.37 | 6.45E-01 | -1.22 | 8.89E-01 |
| MTRNR2L5     | -0.93 | 8.24E-01 | 0.59  | 2.77E-01 | 1.63  | 5.12E-02 |
| CREB3L3      | -0.93 | 8.25E-01 | -0.74 | 7.70E-01 | -0.17 | 5.66E-01 |
| NUP85        | -0.93 | 8.25E-01 | 0.14  | 4.43E-01 | -0.84 | 7.99E-01 |
| DHH          | -0.93 | 8.25E-01 | -1.14 | 8.73E-01 | -1.34 | 9.09E-01 |
| RP11-321F6.1 | -0.93 | 8.25E-01 | -0.60 | 7.25E-01 | -0.56 | 7.11E-01 |

|          |       |          |       |          |       |          |
|----------|-------|----------|-------|----------|-------|----------|
| COL5A1   | -0.93 | 8.25E-01 | 0.72  | 2.37E-01 | -0.25 | 6.00E-01 |
| WDR89    | -0.93 | 8.25E-01 | -1.47 | 9.29E-01 | -0.91 | 8.18E-01 |
| SPATS1   | -0.93 | 8.25E-01 | 0.33  | 3.72E-01 | -0.46 | 6.77E-01 |
| OTOF     | -0.93 | 8.25E-01 | -0.63 | 7.37E-01 | -0.01 | 5.04E-01 |
| RTN4R    | -0.93 | 8.25E-01 | -0.80 | 7.89E-01 | -0.02 | 5.07E-01 |
| MAN1B1   | -0.94 | 8.25E-01 | -1.30 | 9.02E-01 | -0.73 | 7.67E-01 |
| SIAH2    | -0.94 | 8.25E-01 | -0.34 | 6.33E-01 | 0.64  | 2.62E-01 |
| LHB      | -0.94 | 8.25E-01 | 0.53  | 2.99E-01 | -0.35 | 6.36E-01 |
| SIRT5    | -0.94 | 8.25E-01 | -1.39 | 9.18E-01 | -0.62 | 7.33E-01 |
| KIAA1009 | -0.94 | 8.25E-01 | -0.31 | 6.20E-01 | -1.12 | 8.68E-01 |
| ERICH2   | -0.94 | 8.25E-01 | -0.99 | 8.38E-01 | 0.08  | 4.67E-01 |
| TRAPPC3L | -0.94 | 8.25E-01 | -0.13 | 5.52E-01 | -0.15 | 5.58E-01 |
| ITPR2    | -0.94 | 8.25E-01 | 0.15  | 4.42E-01 | -1.91 | 9.72E-01 |
| MT3      | -0.94 | 8.26E-01 | -0.60 | 7.25E-01 | -0.71 | 7.62E-01 |
| PLEKHH1  | -0.94 | 8.26E-01 | -0.23 | 5.91E-01 | -1.63 | 9.48E-01 |
| OR9A2    | -0.94 | 8.26E-01 | -1.54 | 9.39E-01 | -0.55 | 7.08E-01 |
| DOC2B    | -0.94 | 8.26E-01 | 0.16  | 4.38E-01 | 0.99  | 1.60E-01 |
| BIVM     | -0.94 | 8.26E-01 | -0.24 | 5.93E-01 | -0.33 | 6.28E-01 |
| SLCO1C1  | -0.94 | 8.26E-01 | 0.18  | 4.28E-01 | 0.47  | 3.19E-01 |
| CCDC167  | -0.94 | 8.26E-01 | -1.14 | 8.72E-01 | 0.88  | 1.91E-01 |
| CAPN14   | -0.94 | 8.26E-01 | -1.16 | 8.77E-01 | 0.38  | 3.51E-01 |
| SYCP3    | -0.94 | 8.26E-01 | 0.26  | 3.99E-01 | 0.26  | 3.96E-01 |
| LSP1     | -0.94 | 8.26E-01 | -1.38 | 9.16E-01 | -0.45 | 6.75E-01 |
| PPAP2A   | -0.94 | 8.26E-01 | -0.17 | 5.66E-01 | 0.11  | 4.58E-01 |
| CALML5   | -0.94 | 8.26E-01 | -0.52 | 6.97E-01 | 0.09  | 4.62E-01 |
| CLEC4E   | -0.94 | 8.26E-01 | 0.01  | 4.95E-01 | -0.08 | 5.32E-01 |
| ASPHD1   | -0.94 | 8.26E-01 | -0.54 | 7.06E-01 | -0.49 | 6.89E-01 |
| FCAR     | -0.94 | 8.26E-01 | -0.73 | 7.66E-01 | -0.68 | 7.52E-01 |
| ASIC4    | -0.94 | 8.26E-01 | -0.56 | 7.13E-01 | -0.42 | 6.63E-01 |
| UBTD2    | -0.94 | 8.26E-01 | -0.22 | 5.85E-01 | 0.32  | 3.75E-01 |
| NYAP2    | -0.94 | 8.26E-01 | -0.79 | 7.87E-01 | -1.33 | 9.09E-01 |

|         |       |          |       |          |       |          |
|---------|-------|----------|-------|----------|-------|----------|
| MAP3K9  | -0.94 | 8.26E-01 | -1.89 | 9.70E-01 | 0.02  | 4.93E-01 |
| SAMHD1  | -0.94 | 8.27E-01 | -0.08 | 5.33E-01 | 1.51  | 6.55E-02 |
| FBXO38  | -0.94 | 8.27E-01 | -1.38 | 9.16E-01 | -0.52 | 6.97E-01 |
| KCNS2   | -0.94 | 8.27E-01 | -0.78 | 7.83E-01 | 0.41  | 3.41E-01 |
| SIRT1   | -0.94 | 8.27E-01 | -0.34 | 6.34E-01 | -0.63 | 7.35E-01 |
| MUC16   | -0.94 | 8.27E-01 | 0.25  | 4.02E-01 | 0.26  | 3.97E-01 |
| NDUFB6  | -0.94 | 8.27E-01 | -1.40 | 9.19E-01 | -0.71 | 7.61E-01 |
| ECI1    | -0.94 | 8.27E-01 | -0.51 | 6.96E-01 | -0.99 | 8.39E-01 |
| CDKL4   | -0.94 | 8.27E-01 | -1.69 | 9.54E-01 | -0.38 | 6.48E-01 |
| MRPL18  | -0.94 | 8.27E-01 | 0.37  | 3.54E-01 | -0.50 | 6.92E-01 |
| QDPR    | -0.94 | 8.27E-01 | -0.55 | 7.10E-01 | 0.11  | 4.57E-01 |
| EML3    | -0.94 | 8.27E-01 | 1.07  | 1.43E-01 | 0.10  | 4.60E-01 |
| NADSYN1 | -0.94 | 8.27E-01 | 0.08  | 4.68E-01 | 0.84  | 2.00E-01 |
| COL9A3  | -0.94 | 8.27E-01 | -0.03 | 5.11E-01 | 0.36  | 3.58E-01 |
| KALRN   | -0.94 | 8.27E-01 | 0.25  | 4.03E-01 | -1.04 | 8.50E-01 |
| NALCN   | -0.94 | 8.27E-01 | -1.17 | 8.79E-01 | -0.18 | 5.70E-01 |
| HOXB9   | -0.94 | 8.27E-01 | -0.59 | 7.23E-01 | -1.11 | 8.67E-01 |
| PPP4C   | -0.94 | 8.27E-01 | -1.32 | 9.06E-01 | -0.02 | 5.08E-01 |
| SLCO1B1 | -0.94 | 8.27E-01 | -0.67 | 7.50E-01 | -0.10 | 5.40E-01 |
| AFG3L2  | -0.94 | 8.27E-01 | -1.03 | 8.49E-01 | -0.90 | 8.17E-01 |
| CCDC114 | -0.94 | 8.27E-01 | -0.17 | 5.66E-01 | -2.15 | 9.84E-01 |
| GMNC    | -0.94 | 8.27E-01 | -0.15 | 5.61E-01 | 0.55  | 2.92E-01 |
| SLC35F3 | -0.94 | 8.27E-01 | -1.00 | 8.41E-01 | -1.13 | 8.71E-01 |
| TMEM159 | -0.95 | 8.28E-01 | -1.03 | 8.49E-01 | -0.41 | 6.58E-01 |
| EIF5A2  | -0.95 | 8.28E-01 | -1.48 | 9.31E-01 | -0.93 | 8.23E-01 |
| ERVW-1  | -0.95 | 8.28E-01 | -1.67 | 9.53E-01 | -0.21 | 5.82E-01 |
| YAF2    | -0.95 | 8.28E-01 | -0.18 | 5.70E-01 | 0.44  | 3.29E-01 |
| SRSF7   | -0.95 | 8.28E-01 | -0.88 | 8.12E-01 | -0.47 | 6.79E-01 |
| PPEF2   | -0.95 | 8.28E-01 | -1.42 | 9.22E-01 | 0.59  | 2.78E-01 |
| PHLDB1  | -0.95 | 8.28E-01 | 0.82  | 2.06E-01 | 0.60  | 2.75E-01 |
| TRMT10A | -0.95 | 8.28E-01 | -1.03 | 8.50E-01 | -0.87 | 8.06E-01 |

|            |       |          |       |          |       |          |
|------------|-------|----------|-------|----------|-------|----------|
| IFITM5     | -0.95 | 8.28E-01 | -0.92 | 8.22E-01 | -0.19 | 5.75E-01 |
| KRTAP10-9  | -0.95 | 8.28E-01 | -0.78 | 7.82E-01 | -0.71 | 7.60E-01 |
| ZNF609     | -0.95 | 8.28E-01 | -0.58 | 7.20E-01 | -0.24 | 5.96E-01 |
| ATP11A     | -0.95 | 8.28E-01 | 0.05  | 4.81E-01 | -1.57 | 9.41E-01 |
| SFN        | -0.95 | 8.28E-01 | 0.72  | 2.37E-01 | 1.43  | 7.65E-02 |
| BRD8       | -0.95 | 8.28E-01 | -0.79 | 7.85E-01 | -0.11 | 5.44E-01 |
| KISS1R     | -0.95 | 8.28E-01 | -0.76 | 7.76E-01 | 0.01  | 4.96E-01 |
| COL11A1    | -0.95 | 8.28E-01 | -0.74 | 7.71E-01 | -0.27 | 6.05E-01 |
| PTTG2      | -0.95 | 8.28E-01 | -0.47 | 6.79E-01 | -1.63 | 9.48E-01 |
| KIF12      | -0.95 | 8.28E-01 | -0.69 | 7.54E-01 | -0.31 | 6.23E-01 |
| DAZAP2     | -0.95 | 8.28E-01 | -0.92 | 8.20E-01 | 0.62  | 2.68E-01 |
| TACC2      | -0.95 | 8.29E-01 | -0.83 | 7.98E-01 | -0.88 | 8.10E-01 |
| TTC32      | -0.95 | 8.29E-01 | -0.19 | 5.77E-01 | -0.52 | 6.98E-01 |
| PAQR7      | -0.95 | 8.29E-01 | -1.81 | 9.65E-01 | -0.65 | 7.43E-01 |
| NKD1       | -0.95 | 8.29E-01 | -1.26 | 8.97E-01 | 0.95  | 1.71E-01 |
| FUT9       | -0.95 | 8.29E-01 | -0.63 | 7.36E-01 | -0.80 | 7.87E-01 |
| C2orf50    | -0.95 | 8.29E-01 | 0.97  | 1.66E-01 | 0.10  | 4.58E-01 |
| PRB2       | -0.95 | 8.29E-01 | 0.00  | 5.01E-01 | 0.07  | 4.70E-01 |
| SFXN5      | -0.95 | 8.29E-01 | -1.08 | 8.61E-01 | -1.17 | 8.80E-01 |
| CRB2       | -0.95 | 8.29E-01 | -0.87 | 8.08E-01 | -1.42 | 9.23E-01 |
| AHCYL1     | -0.95 | 8.29E-01 | 0.15  | 4.42E-01 | 1.10  | 1.36E-01 |
| TMEM256    | -0.95 | 8.29E-01 | -0.10 | 5.40E-01 | -1.15 | 8.74E-01 |
| AC104667.3 | -0.95 | 8.29E-01 | -0.02 | 5.07E-01 | 0.94  | 1.73E-01 |
| ZBTB45     | -0.95 | 8.29E-01 | -2.27 | 9.88E-01 | -0.35 | 6.36E-01 |
| MITF       | -0.95 | 8.29E-01 | 0.82  | 2.07E-01 | 0.16  | 4.35E-01 |
| MAN1C1     | -0.95 | 8.29E-01 | -1.16 | 8.76E-01 | 0.00  | 5.01E-01 |
| FAM32A     | -0.95 | 8.29E-01 | -1.25 | 8.95E-01 | -0.58 | 7.20E-01 |
| HRNR       | -0.95 | 8.29E-01 | -0.30 | 6.20E-01 | -1.42 | 9.22E-01 |
| TIMM10B    | -0.95 | 8.29E-01 | -1.53 | 9.38E-01 | -1.03 | 8.48E-01 |
| THOC6      | -0.95 | 8.30E-01 | -1.08 | 8.60E-01 | -1.09 | 8.62E-01 |
| DES        | -0.95 | 8.30E-01 | -0.64 | 7.37E-01 | -0.37 | 6.45E-01 |

|          |       |          |       |          |       |          |
|----------|-------|----------|-------|----------|-------|----------|
| TEX35    | -0.95 | 8.30E-01 | -0.16 | 5.64E-01 | -0.33 | 6.29E-01 |
| NPFFR1   | -0.95 | 8.30E-01 | 0.68  | 2.48E-01 | -0.01 | 5.02E-01 |
| BAIAP3   | -0.95 | 8.30E-01 | -0.05 | 5.19E-01 | -0.95 | 8.28E-01 |
| FHOD3    | -0.95 | 8.30E-01 | 0.58  | 2.82E-01 | 0.17  | 4.31E-01 |
| CD180    | -0.95 | 8.30E-01 | -0.21 | 5.83E-01 | 0.92  | 1.79E-01 |
| TTC22    | -0.95 | 8.30E-01 | -1.04 | 8.51E-01 | 0.86  | 1.96E-01 |
| TMEM50A  | -0.95 | 8.30E-01 | 0.85  | 1.97E-01 | 1.42  | 7.85E-02 |
| PROKR2   | -0.95 | 8.30E-01 | 0.02  | 4.92E-01 | -0.35 | 6.39E-01 |
| CHKA     | -0.95 | 8.30E-01 | -0.37 | 6.46E-01 | -0.76 | 7.77E-01 |
| ABL1     | -0.95 | 8.30E-01 | -0.92 | 8.21E-01 | -0.55 | 7.09E-01 |
| SLC5A10  | -0.95 | 8.30E-01 | -1.19 | 8.82E-01 | -0.22 | 5.88E-01 |
| PARS2    | -0.95 | 8.30E-01 | 1.01  | 1.57E-01 | 1.14  | 1.27E-01 |
| SMARCA2  | -0.95 | 8.30E-01 | -0.33 | 6.30E-01 | -0.46 | 6.77E-01 |
| CBY1     | -0.95 | 8.30E-01 | -0.24 | 5.95E-01 | -0.80 | 7.88E-01 |
| WIPF3    | -0.95 | 8.30E-01 | -1.15 | 8.76E-01 | 0.52  | 3.00E-01 |
| USB1     | -0.95 | 8.30E-01 | -0.20 | 5.80E-01 | -0.44 | 6.69E-01 |
| ZNF136   | -0.96 | 8.30E-01 | -0.36 | 6.41E-01 | -0.05 | 5.18E-01 |
| C21orf91 | -0.96 | 8.30E-01 | -1.78 | 9.62E-01 | -0.73 | 7.68E-01 |
| CUZD1    | -0.96 | 8.30E-01 | 0.51  | 3.05E-01 | -0.04 | 5.16E-01 |
| CLPP     | -0.96 | 8.31E-01 | -2.00 | 9.77E-01 | -0.33 | 6.28E-01 |
| GIMAP8   | -0.96 | 8.31E-01 | -0.50 | 6.92E-01 | 0.08  | 4.69E-01 |
| KANSL3   | -0.96 | 8.31E-01 | -1.11 | 8.66E-01 | -0.93 | 8.24E-01 |
| RFPL4B   | -0.96 | 8.31E-01 | -0.09 | 5.36E-01 | -0.50 | 6.91E-01 |
| LSM6     | -0.96 | 8.31E-01 | -1.10 | 8.65E-01 | -1.45 | 9.26E-01 |
| ISX      | -0.96 | 8.31E-01 | -0.63 | 7.36E-01 | 0.27  | 3.92E-01 |
| BOP1     | -0.96 | 8.31E-01 | -0.62 | 7.32E-01 | -0.69 | 7.55E-01 |
| PAN3     | -0.96 | 8.31E-01 | 0.51  | 3.06E-01 | 0.21  | 4.16E-01 |
| KCNK4    | -0.96 | 8.31E-01 | -0.76 | 7.75E-01 | -1.52 | 9.36E-01 |
| SLC38A2  | -0.96 | 8.31E-01 | -0.96 | 8.31E-01 | -1.27 | 8.98E-01 |
| POM121C  | -0.96 | 8.31E-01 | -2.23 | 9.87E-01 | -0.06 | 5.25E-01 |
| HNRNPC   | -0.96 | 8.31E-01 | -0.27 | 6.06E-01 | 0.65  | 2.58E-01 |



|          |       |          |       |          |       |          |
|----------|-------|----------|-------|----------|-------|----------|
| NOL11    | -0.96 | 8.31E-01 | 0.34  | 3.68E-01 | -0.06 | 5.22E-01 |
| BTBD17   | -0.96 | 8.32E-01 | -1.12 | 8.69E-01 | -0.27 | 6.08E-01 |
| PLEKHG2  | -0.96 | 8.32E-01 | -1.64 | 9.49E-01 | 0.53  | 2.99E-01 |
| SSUH2    | -0.96 | 8.32E-01 | 0.00  | 5.01E-01 | -1.67 | 9.53E-01 |
| DNAH8    | -0.96 | 8.32E-01 | 0.12  | 4.50E-01 | -0.42 | 6.63E-01 |
| CCDC62   | -0.96 | 8.32E-01 | -0.49 | 6.88E-01 | 0.64  | 2.60E-01 |
| OR52B1P  | -0.96 | 8.32E-01 | -2.41 | 9.92E-01 | -0.52 | 6.97E-01 |
| LOR      | -0.96 | 8.32E-01 | 0.56  | 2.88E-01 | -0.99 | 8.38E-01 |
| MRPL54   | -0.96 | 8.32E-01 | -1.11 | 8.66E-01 | -0.69 | 7.55E-01 |
| KITLG    | -0.96 | 8.32E-01 | -0.17 | 5.69E-01 | -1.28 | 8.99E-01 |
| ATP10A   | -0.96 | 8.32E-01 | -0.32 | 6.27E-01 | -1.06 | 8.54E-01 |
| TLX3     | -0.96 | 8.32E-01 | -1.10 | 8.64E-01 | 0.29  | 3.85E-01 |
| HERC1    | -0.96 | 8.32E-01 | -0.23 | 5.92E-01 | 0.39  | 3.47E-01 |
| C16orf3  | -0.96 | 8.32E-01 | -1.68 | 9.53E-01 | -0.20 | 5.80E-01 |
| RASSF8   | -0.96 | 8.32E-01 | 0.05  | 4.80E-01 | -0.54 | 7.07E-01 |
| OR13C2   | -0.96 | 8.32E-01 | -0.29 | 6.16E-01 | 0.49  | 3.14E-01 |
| RPL5     | -0.96 | 8.32E-01 | -0.39 | 6.52E-01 | 0.39  | 3.48E-01 |
| TIMM44   | -0.96 | 8.32E-01 | -0.65 | 7.42E-01 | -0.74 | 7.71E-01 |
| IQCD     | -0.96 | 8.32E-01 | -1.28 | 9.00E-01 | -0.62 | 7.31E-01 |
| DNTTIP2  | -0.96 | 8.32E-01 | -0.93 | 8.24E-01 | -0.12 | 5.46E-01 |
| CACNA1D  | -0.96 | 8.32E-01 | 0.52  | 3.03E-01 | -1.47 | 9.30E-01 |
| TRMT10B  | -0.96 | 8.32E-01 | -1.15 | 8.74E-01 | -0.70 | 7.58E-01 |
| OR11H4   | -0.96 | 8.32E-01 | -1.39 | 9.18E-01 | -0.80 | 7.90E-01 |
| DHX37    | -0.96 | 8.32E-01 | -0.44 | 6.70E-01 | -0.51 | 6.96E-01 |
| CCDC146  | -0.96 | 8.32E-01 | 0.25  | 4.00E-01 | -0.72 | 7.63E-01 |
| GBP5     | -0.96 | 8.32E-01 | -0.50 | 6.92E-01 | 0.11  | 4.56E-01 |
| SFMBT1   | -0.96 | 8.32E-01 | -0.34 | 6.32E-01 | 1.53  | 6.26E-02 |
| NOC2L    | -0.96 | 8.32E-01 | -1.59 | 9.44E-01 | -0.16 | 5.65E-01 |
| SMIM13   | -0.96 | 8.32E-01 | -1.44 | 9.26E-01 | -0.47 | 6.81E-01 |
| RLN2     | -0.96 | 8.32E-01 | -1.30 | 9.04E-01 | -1.08 | 8.59E-01 |
| C17orf77 | -0.96 | 8.32E-01 | -0.77 | 7.78E-01 | -2.13 | 9.83E-01 |

|          |       |          |       |          |       |          |
|----------|-------|----------|-------|----------|-------|----------|
| OTUB1    | -0.96 | 8.33E-01 | -1.00 | 8.42E-01 | -1.07 | 8.58E-01 |
| CBLN1    | -0.96 | 8.33E-01 | 0.44  | 3.32E-01 | -0.21 | 5.85E-01 |
| RABGAP1L | -0.96 | 8.33E-01 | -0.26 | 6.03E-01 | -0.05 | 5.21E-01 |
| MRC2     | -0.96 | 8.33E-01 | 0.65  | 2.57E-01 | -0.19 | 5.77E-01 |
| INA      | -0.96 | 8.33E-01 | -0.94 | 8.25E-01 | -0.59 | 7.23E-01 |
| KCMF1    | -0.97 | 8.33E-01 | 0.01  | 4.96E-01 | 0.15  | 4.40E-01 |
| PLCB1    | -0.97 | 8.33E-01 | -0.47 | 6.81E-01 | -1.64 | 9.49E-01 |
| C17orf96 | -0.97 | 8.33E-01 | -0.88 | 8.11E-01 | 0.21  | 4.17E-01 |
| RPAIN    | -0.97 | 8.33E-01 | 0.26  | 3.98E-01 | 0.25  | 4.01E-01 |
| FZR1     | -0.97 | 8.33E-01 | 0.49  | 3.13E-01 | 1.80  | 3.60E-02 |
| MYO1H    | -0.97 | 8.33E-01 | -0.55 | 7.09E-01 | -1.59 | 9.44E-01 |
| CPA2     | -0.97 | 8.33E-01 | 0.64  | 2.60E-01 | -0.94 | 8.27E-01 |
| MC2R     | -0.97 | 8.33E-01 | -0.49 | 6.90E-01 | -0.72 | 7.65E-01 |
| TPP2     | -0.97 | 8.33E-01 | 0.73  | 2.31E-01 | 0.44  | 3.31E-01 |
| TOX4     | -0.97 | 8.33E-01 | 1.44  | 7.45E-02 | 0.40  | 3.45E-01 |
| HLCS     | -0.97 | 8.33E-01 | 0.03  | 4.90E-01 | 0.48  | 3.16E-01 |
| EXOSC5   | -0.97 | 8.33E-01 | 0.87  | 1.93E-01 | 1.14  | 1.27E-01 |
| TJP1     | -0.97 | 8.33E-01 | 0.21  | 4.18E-01 | -0.51 | 6.96E-01 |
| FOXN4    | -0.97 | 8.34E-01 | -0.84 | 8.00E-01 | -0.46 | 6.76E-01 |
| PAGR1    | -0.97 | 8.34E-01 | -1.01 | 8.44E-01 | -0.79 | 7.85E-01 |
| RBFOX1   | -0.97 | 8.34E-01 | -0.37 | 6.44E-01 | -2.38 | 9.91E-01 |
| POLR3C   | -0.97 | 8.34E-01 | -0.66 | 7.45E-01 | -0.86 | 8.06E-01 |
| ZNF720   | -0.97 | 8.34E-01 | 0.11  | 4.54E-01 | -1.14 | 8.73E-01 |
| RFX1     | -0.97 | 8.34E-01 | 0.61  | 2.70E-01 | 0.14  | 4.43E-01 |
| IFIT1    | -0.97 | 8.34E-01 | -0.61 | 7.30E-01 | 1.01  | 1.57E-01 |
| RNF122   | -0.97 | 8.34E-01 | -0.93 | 8.25E-01 | 0.32  | 3.74E-01 |
| OR51F2   | -0.97 | 8.34E-01 | 0.02  | 4.91E-01 | 0.12  | 4.53E-01 |
| MYLK4    | -0.97 | 8.34E-01 | -1.24 | 8.92E-01 | -1.59 | 9.44E-01 |
| TNFSF13B | -0.97 | 8.34E-01 | -0.30 | 6.17E-01 | -0.44 | 6.71E-01 |
| WDR82    | -0.97 | 8.34E-01 | -0.78 | 7.82E-01 | -0.74 | 7.70E-01 |
| ZNF776   | -0.97 | 8.34E-01 | -2.39 | 9.92E-01 | -0.09 | 5.37E-01 |

|               |       |          |       |          |       |          |
|---------------|-------|----------|-------|----------|-------|----------|
| DCAF7         | -0.97 | 8.34E-01 | -0.17 | 5.68E-01 | -0.58 | 7.18E-01 |
| SCP2          | -0.97 | 8.34E-01 | -0.90 | 8.16E-01 | -0.65 | 7.42E-01 |
| LATS2         | -0.97 | 8.34E-01 | -1.05 | 8.52E-01 | 0.15  | 4.40E-01 |
| FAM196A       | -0.97 | 8.35E-01 | 0.01  | 4.95E-01 | 1.02  | 1.55E-01 |
| OSBPL5        | -0.97 | 8.35E-01 | -1.47 | 9.29E-01 | -0.64 | 7.40E-01 |
| TMA7          | -0.97 | 8.35E-01 | 0.08  | 4.68E-01 | 0.36  | 3.59E-01 |
| CAP1          | -0.97 | 8.35E-01 | -0.09 | 5.35E-01 | -1.91 | 9.72E-01 |
| CCND1         | -0.97 | 8.35E-01 | -1.21 | 8.88E-01 | -0.59 | 7.22E-01 |
| CCDC59        | -0.97 | 8.35E-01 | 0.82  | 2.07E-01 | 0.83  | 2.04E-01 |
| FUZ           | -0.97 | 8.35E-01 | -0.59 | 7.24E-01 | -1.63 | 9.49E-01 |
| CES2          | -0.97 | 8.35E-01 | -0.84 | 8.00E-01 | 0.30  | 3.81E-01 |
| ACSL6         | -0.97 | 8.35E-01 | -0.29 | 6.14E-01 | -1.44 | 9.25E-01 |
| METTL14       | -0.97 | 8.35E-01 | -0.65 | 7.42E-01 | -1.15 | 8.76E-01 |
| SFI1          | -0.97 | 8.35E-01 | -0.23 | 5.91E-01 | -0.56 | 7.13E-01 |
| ERO1LB        | -0.97 | 8.35E-01 | -0.49 | 6.87E-01 | -0.44 | 6.70E-01 |
| AGFG1         | -0.97 | 8.35E-01 | -0.60 | 7.26E-01 | 1.27  | 1.02E-01 |
| UGT1A10       | -0.97 | 8.35E-01 | -0.59 | 7.22E-01 | -0.13 | 5.53E-01 |
| TNNT2         | -0.97 | 8.35E-01 | -0.27 | 6.06E-01 | -1.41 | 9.21E-01 |
| RBKS          | -0.97 | 8.35E-01 | -0.95 | 8.28E-01 | -0.64 | 7.39E-01 |
| PMFBP1        | -0.98 | 8.35E-01 | -0.93 | 8.24E-01 | -0.12 | 5.49E-01 |
| RP11-322L20.1 | -0.98 | 8.35E-01 | 0.08  | 4.69E-01 | -0.20 | 5.78E-01 |
| VEZT          | -0.98 | 8.35E-01 | -0.43 | 6.66E-01 | -0.45 | 6.75E-01 |
| SYT4          | -0.98 | 8.35E-01 | -0.19 | 5.75E-01 | -0.74 | 7.72E-01 |
| CD3EAP        | -0.98 | 8.36E-01 | -1.44 | 9.25E-01 | -1.01 | 8.43E-01 |
| APOC3         | -0.98 | 8.36E-01 | -1.49 | 9.32E-01 | 0.21  | 4.16E-01 |
| GDF7          | -0.98 | 8.36E-01 | 0.28  | 3.89E-01 | -0.48 | 6.85E-01 |
| RWDD3         | -0.98 | 8.36E-01 | 0.65  | 2.59E-01 | -0.01 | 5.02E-01 |
| CSDC2         | -0.98 | 8.36E-01 | -1.19 | 8.83E-01 | -0.75 | 7.72E-01 |
| ZNF557        | -0.98 | 8.36E-01 | -1.68 | 9.53E-01 | -0.62 | 7.31E-01 |
| MYPN          | -0.98 | 8.36E-01 | 0.61  | 2.70E-01 | -1.11 | 8.67E-01 |
| PEBP1         | -0.98 | 8.36E-01 | -0.61 | 7.31E-01 | -0.02 | 5.09E-01 |

|           |       |          |       |          |       |          |
|-----------|-------|----------|-------|----------|-------|----------|
| KRTAP21-3 | -0.98 | 8.36E-01 | -1.83 | 9.66E-01 | -0.69 | 7.55E-01 |
| C2CD4C    | -0.98 | 8.36E-01 | -0.35 | 6.36E-01 | -0.22 | 5.87E-01 |
| ZNF446    | -0.98 | 8.36E-01 | -0.68 | 7.53E-01 | -1.14 | 8.73E-01 |
| PAPOLG    | -0.98 | 8.36E-01 | 0.34  | 3.65E-01 | -0.04 | 5.15E-01 |
| ATP2B4    | -0.98 | 8.36E-01 | 0.09  | 4.66E-01 | -0.17 | 5.67E-01 |
| TMEM56    | -0.98 | 8.36E-01 | -0.44 | 6.70E-01 | -0.73 | 7.66E-01 |
| ZNF556    | -0.98 | 8.36E-01 | 0.01  | 4.98E-01 | -1.19 | 8.82E-01 |
| PIM1      | -0.98 | 8.36E-01 | 0.58  | 2.80E-01 | -0.41 | 6.59E-01 |
| C19orf71  | -0.98 | 8.36E-01 | -0.19 | 5.75E-01 | 1.32  | 9.26E-02 |
| KRT9      | -0.98 | 8.36E-01 | -1.49 | 9.32E-01 | -0.78 | 7.81E-01 |
| OR6C4     | -0.98 | 8.36E-01 | -1.18 | 8.81E-01 | -0.31 | 6.21E-01 |
| C15orf48  | -0.98 | 8.37E-01 | -0.90 | 8.16E-01 | -1.12 | 8.68E-01 |
| H6PD      | -0.98 | 8.37E-01 | -0.48 | 6.86E-01 | 0.04  | 4.86E-01 |
| RD3       | -0.98 | 8.37E-01 | 1.27  | 1.01E-01 | 1.29  | 9.93E-02 |
| SHMT2     | -0.98 | 8.37E-01 | -0.49 | 6.90E-01 | -0.90 | 8.15E-01 |
| CCDC116   | -0.98 | 8.37E-01 | -0.21 | 5.84E-01 | 1.06  | 1.45E-01 |
| SLC13A4   | -0.98 | 8.37E-01 | -1.09 | 8.63E-01 | -1.55 | 9.39E-01 |
| ARL4D     | -0.98 | 8.37E-01 | -0.49 | 6.87E-01 | -0.67 | 7.50E-01 |
| SLC48A1   | -0.98 | 8.37E-01 | -1.15 | 8.74E-01 | -0.29 | 6.16E-01 |
| MAP3K3    | -0.98 | 8.37E-01 | -1.05 | 8.53E-01 | -0.92 | 8.22E-01 |
| FGF17     | -0.98 | 8.37E-01 | 0.11  | 4.57E-01 | 0.08  | 4.66E-01 |
| CCDC67    | -0.98 | 8.37E-01 | -0.59 | 7.21E-01 | -0.49 | 6.86E-01 |
| MTERF     | -0.98 | 8.37E-01 | -1.29 | 9.02E-01 | -0.06 | 5.23E-01 |
| LRRC73    | -0.98 | 8.37E-01 | -0.68 | 7.53E-01 | -0.27 | 6.07E-01 |
| TRAF2     | -0.98 | 8.37E-01 | -0.21 | 5.84E-01 | -0.34 | 6.33E-01 |
| FAM168B   | -0.98 | 8.37E-01 | -0.39 | 6.51E-01 | -0.39 | 6.52E-01 |
| PAPOLB    | -0.98 | 8.37E-01 | -0.60 | 7.26E-01 | -1.74 | 9.59E-01 |
| C17orf85  | -0.98 | 8.37E-01 | -1.77 | 9.62E-01 | 0.36  | 3.58E-01 |
| MATN3     | -0.98 | 8.37E-01 | -1.18 | 8.80E-01 | -1.32 | 9.07E-01 |
| KIAA1683  | -0.98 | 8.37E-01 | -1.32 | 9.07E-01 | -0.61 | 7.28E-01 |
| SIX5      | -0.98 | 8.37E-01 | -0.52 | 6.99E-01 | 0.44  | 3.29E-01 |

|              |       |          |       |          |       |          |
|--------------|-------|----------|-------|----------|-------|----------|
| MEPE         | -0.98 | 8.37E-01 | 0.17  | 4.33E-01 | -0.82 | 7.94E-01 |
| RP11-315O6.2 | -0.98 | 8.37E-01 | -1.55 | 9.40E-01 | 0.08  | 4.69E-01 |
| MSMB         | -0.98 | 8.38E-01 | -0.65 | 7.41E-01 | -0.82 | 7.94E-01 |
| DNAH7        | -0.99 | 8.38E-01 | -0.64 | 7.39E-01 | -1.14 | 8.74E-01 |
| MRPS22       | -0.99 | 8.38E-01 | 0.90  | 1.83E-01 | -0.69 | 7.55E-01 |
| TYR          | -0.99 | 8.38E-01 | 0.11  | 4.55E-01 | 0.49  | 3.10E-01 |
| UBBP4        | -0.99 | 8.38E-01 | -0.17 | 5.69E-01 | 0.88  | 1.89E-01 |
| TMEM147      | -0.99 | 8.38E-01 | -0.23 | 5.90E-01 | 0.58  | 2.82E-01 |
| MDM1         | -0.99 | 8.38E-01 | -0.56 | 7.12E-01 | -0.71 | 7.61E-01 |
| FZD7         | -0.99 | 8.38E-01 | -2.02 | 9.78E-01 | -0.59 | 7.24E-01 |
| WDR38        | -0.99 | 8.38E-01 | -0.75 | 7.73E-01 | -0.14 | 5.56E-01 |
| DRG1         | -0.99 | 8.38E-01 | -0.72 | 7.65E-01 | -0.70 | 7.58E-01 |
| LIN9         | -0.99 | 8.38E-01 | 0.20  | 4.22E-01 | 0.62  | 2.69E-01 |
| DLG5         | -0.99 | 8.38E-01 | 0.67  | 2.53E-01 | 0.27  | 3.94E-01 |
| ACOT8        | -0.99 | 8.38E-01 | -1.55 | 9.39E-01 | -0.60 | 7.26E-01 |
| LRP1         | -0.99 | 8.38E-01 | -1.03 | 8.47E-01 | -1.16 | 8.77E-01 |
| C6orf57      | -0.99 | 8.38E-01 | -1.16 | 8.76E-01 | 0.23  | 4.07E-01 |
| SFXN4        | -0.99 | 8.38E-01 | 0.50  | 3.07E-01 | 1.53  | 6.31E-02 |
| TNPO3        | -0.99 | 8.38E-01 | -2.01 | 9.78E-01 | 0.31  | 3.79E-01 |
| C21orf67     | -0.99 | 8.38E-01 | -0.97 | 8.34E-01 | -0.48 | 6.83E-01 |
| NR6A1        | -0.99 | 8.38E-01 | -1.08 | 8.60E-01 | -0.67 | 7.48E-01 |
| S100P        | -0.99 | 8.38E-01 | -0.79 | 7.85E-01 | -0.88 | 8.11E-01 |
| TBC1D21      | -0.99 | 8.38E-01 | -1.35 | 9.11E-01 | -1.19 | 8.83E-01 |
| NT5C         | -0.99 | 8.38E-01 | 0.11  | 4.58E-01 | -0.94 | 8.27E-01 |
| ATP1A1       | -0.99 | 8.39E-01 | -1.08 | 8.60E-01 | -0.74 | 7.69E-01 |
| ETAA1        | -0.99 | 8.39E-01 | 0.60  | 2.74E-01 | -0.64 | 7.40E-01 |
| OXSRI        | -0.99 | 8.39E-01 | -0.66 | 7.45E-01 | -0.47 | 6.80E-01 |
| ZNF22        | -0.99 | 8.39E-01 | 0.25  | 4.01E-01 | -0.78 | 7.82E-01 |
| OAZ2         | -0.99 | 8.39E-01 | -0.84 | 8.01E-01 | -0.73 | 7.68E-01 |
| EXPH5        | -0.99 | 8.39E-01 | -0.81 | 7.90E-01 | -2.06 | 9.80E-01 |
| LCE1B        | -0.99 | 8.39E-01 | 0.20  | 4.21E-01 | -0.12 | 5.49E-01 |

|         |       |          |       |          |       |          |
|---------|-------|----------|-------|----------|-------|----------|
| FHOD1   | -0.99 | 8.39E-01 | -2.00 | 9.77E-01 | -0.85 | 8.02E-01 |
| IQGAP2  | -0.99 | 8.39E-01 | -0.85 | 8.02E-01 | -1.54 | 9.38E-01 |
| ZGLP1   | -0.99 | 8.39E-01 | -1.27 | 8.98E-01 | -0.19 | 5.75E-01 |
| P2RX4   | -0.99 | 8.39E-01 | 0.51  | 3.05E-01 | 0.84  | 1.99E-01 |
| VPS16   | -0.99 | 8.39E-01 | -1.42 | 9.22E-01 | -0.87 | 8.07E-01 |
| CA4     | -0.99 | 8.39E-01 | 0.37  | 3.57E-01 | -0.17 | 5.67E-01 |
| OTOP1   | -0.99 | 8.40E-01 | -1.85 | 9.68E-01 | 0.28  | 3.90E-01 |
| RYR1    | -0.99 | 8.40E-01 | 0.38  | 3.52E-01 | -0.65 | 7.43E-01 |
| CPEB3   | -0.99 | 8.40E-01 | -0.32 | 6.26E-01 | -0.99 | 8.39E-01 |
| CRISP2  | -0.99 | 8.40E-01 | -1.60 | 9.45E-01 | -0.91 | 8.19E-01 |
| HMGB1   | -0.99 | 8.40E-01 | -1.52 | 9.36E-01 | -0.96 | 8.31E-01 |
| PNLIP   | -0.99 | 8.40E-01 | -0.66 | 7.46E-01 | 0.96  | 1.68E-01 |
| SLC20A1 | -1.00 | 8.40E-01 | -0.77 | 7.81E-01 | -1.24 | 8.93E-01 |
| ELAVL3  | -1.00 | 8.40E-01 | -0.26 | 6.03E-01 | -0.12 | 5.48E-01 |
| VPS25   | -1.00 | 8.40E-01 | -1.49 | 9.32E-01 | -0.78 | 7.82E-01 |
| UNC119  | -1.00 | 8.40E-01 | -0.66 | 7.45E-01 | -0.78 | 7.83E-01 |
| SLC52A2 | -1.00 | 8.40E-01 | -1.04 | 8.51E-01 | -0.44 | 6.71E-01 |
| ARPC4   | -1.00 | 8.40E-01 | -0.42 | 6.62E-01 | -0.73 | 7.67E-01 |
| P2RX7   | -1.00 | 8.41E-01 | 0.18  | 4.30E-01 | -0.18 | 5.72E-01 |
| GPR139  | -1.00 | 8.41E-01 | -0.78 | 7.83E-01 | -0.34 | 6.34E-01 |
| HSPB9   | -1.00 | 8.41E-01 | 0.91  | 1.82E-01 | 0.81  | 2.09E-01 |
| SNX27   | -1.00 | 8.41E-01 | -1.02 | 8.47E-01 | -1.62 | 9.47E-01 |
| DMP1    | -1.00 | 8.41E-01 | -0.47 | 6.81E-01 | 0.82  | 2.07E-01 |
| ANKRD16 | -1.00 | 8.41E-01 | -1.47 | 9.30E-01 | -0.33 | 6.30E-01 |
| CAMKV   | -1.00 | 8.41E-01 | 1.05  | 1.46E-01 | 0.93  | 1.75E-01 |
| ALDH1L2 | -1.00 | 8.41E-01 | -0.70 | 7.59E-01 | -1.11 | 8.67E-01 |
| GC      | -1.00 | 8.41E-01 | 0.58  | 2.81E-01 | -0.43 | 6.66E-01 |
| KLB     | -1.00 | 8.41E-01 | -1.97 | 9.76E-01 | -0.46 | 6.79E-01 |
| FGFR2   | -1.00 | 8.41E-01 | -0.86 | 8.04E-01 | -1.57 | 9.42E-01 |
| FNIP1   | -1.00 | 8.41E-01 | -0.35 | 6.36E-01 | -1.07 | 8.58E-01 |
| MAP7D1  | -1.00 | 8.42E-01 | -1.07 | 8.58E-01 | -0.86 | 8.06E-01 |

|          |       |          |       |          |       |          |
|----------|-------|----------|-------|----------|-------|----------|
| TPCN1    | -1.00 | 8.42E-01 | -1.18 | 8.80E-01 | -0.54 | 7.04E-01 |
| SYT9     | -1.00 | 8.42E-01 | -0.12 | 5.49E-01 | -0.60 | 7.26E-01 |
| LDHAL6B  | -1.00 | 8.42E-01 | -1.01 | 8.44E-01 | -1.53 | 9.36E-01 |
| CAND1    | -1.00 | 8.42E-01 | 1.02  | 1.54E-01 | 0.04  | 4.86E-01 |
| LDHB     | -1.00 | 8.42E-01 | -0.47 | 6.80E-01 | 0.24  | 4.05E-01 |
| MTAP     | -1.00 | 8.42E-01 | 0.19  | 4.25E-01 | -0.53 | 7.03E-01 |
| PLA2G16  | -1.00 | 8.42E-01 | -0.75 | 7.73E-01 | -1.36 | 9.13E-01 |
| TMEM125  | -1.00 | 8.42E-01 | -2.33 | 9.90E-01 | 0.57  | 2.84E-01 |
| PLXND1   | -1.00 | 8.42E-01 | 0.69  | 2.45E-01 | -0.29 | 6.15E-01 |
| OR51G2   | -1.00 | 8.42E-01 | 0.61  | 2.71E-01 | -0.29 | 6.13E-01 |
| YWHAG    | -1.00 | 8.42E-01 | -0.69 | 7.54E-01 | -1.17 | 8.80E-01 |
| DHRS1    | -1.00 | 8.42E-01 | -0.78 | 7.82E-01 | -0.05 | 5.18E-01 |
| MLXIPL   | -1.00 | 8.42E-01 | -1.36 | 9.14E-01 | -0.23 | 5.92E-01 |
| HS3ST3A1 | -1.00 | 8.42E-01 | -0.70 | 7.57E-01 | -0.83 | 7.97E-01 |
| TBC1D30  | -1.00 | 8.42E-01 | -0.39 | 6.52E-01 | -0.43 | 6.68E-01 |
| TAF1B    | -1.00 | 8.42E-01 | 0.68  | 2.47E-01 | 1.57  | 5.82E-02 |
| REGL     | -1.00 | 8.42E-01 | -1.06 | 8.55E-01 | -0.36 | 6.39E-01 |
| PCNA     | -1.00 | 8.42E-01 | -1.18 | 8.81E-01 | -0.33 | 6.29E-01 |
| IL3      | -1.00 | 8.42E-01 | -0.49 | 6.89E-01 | -0.70 | 7.58E-01 |
| METTL21B | -1.00 | 8.42E-01 | 0.08  | 4.67E-01 | -0.39 | 6.51E-01 |
| TTC30B   | -1.00 | 8.42E-01 | -1.82 | 9.65E-01 | -0.76 | 7.77E-01 |
| POLR2B   | -1.00 | 8.42E-01 | 0.94  | 1.74E-01 | -1.40 | 9.19E-01 |
| LIPG     | -1.00 | 8.43E-01 | 0.41  | 3.40E-01 | -0.63 | 7.37E-01 |
| S100Z    | -1.01 | 8.43E-01 | -0.46 | 6.78E-01 | -1.30 | 9.03E-01 |
| PEX1     | -1.01 | 8.43E-01 | -0.22 | 5.88E-01 | 0.25  | 4.00E-01 |
| WDR7     | -1.01 | 8.43E-01 | 0.08  | 4.70E-01 | 0.24  | 4.04E-01 |
| RBPM52   | -1.01 | 8.43E-01 | -0.28 | 6.09E-01 | -0.22 | 5.89E-01 |
| CLIC4    | -1.01 | 8.43E-01 | -0.92 | 8.22E-01 | 0.02  | 4.93E-01 |
| ZNF215   | -1.01 | 8.43E-01 | -0.24 | 5.96E-01 | -0.44 | 6.71E-01 |
| SPINT4   | -1.01 | 8.43E-01 | -0.33 | 6.29E-01 | -0.19 | 5.75E-01 |
| ZNF586   | -1.01 | 8.43E-01 | -0.96 | 8.32E-01 | -0.92 | 8.20E-01 |

|           |       |          |       |          |       |          |
|-----------|-------|----------|-------|----------|-------|----------|
| TRIM9     | -1.01 | 8.43E-01 | 0.10  | 4.61E-01 | -2.27 | 9.88E-01 |
| CCM2L     | -1.01 | 8.43E-01 | 0.18  | 4.30E-01 | 0.27  | 3.95E-01 |
| CA7       | -1.01 | 8.43E-01 | -0.82 | 7.94E-01 | 0.19  | 4.25E-01 |
| MKNK1     | -1.01 | 8.43E-01 | -0.65 | 7.43E-01 | 1.49  | 6.79E-02 |
| RMND1     | -1.01 | 8.43E-01 | -0.87 | 8.07E-01 | 0.17  | 4.31E-01 |
| WIPF2     | -1.01 | 8.43E-01 | -0.32 | 6.24E-01 | -0.67 | 7.49E-01 |
| PCTP      | -1.01 | 8.43E-01 | 0.08  | 4.69E-01 | -1.37 | 9.15E-01 |
| PGLYRP3   | -1.01 | 8.43E-01 | -1.02 | 8.45E-01 | -1.31 | 9.04E-01 |
| RIMS4     | -1.01 | 8.43E-01 | -1.54 | 9.38E-01 | -0.57 | 7.17E-01 |
| BEST3     | -1.01 | 8.43E-01 | -0.27 | 6.07E-01 | -0.76 | 7.76E-01 |
| ACADVL    | -1.01 | 8.43E-01 | -1.16 | 8.77E-01 | -0.37 | 6.45E-01 |
| SCAMP4    | -1.01 | 8.43E-01 | 0.24  | 4.04E-01 | 0.24  | 4.05E-01 |
| SYDE1     | -1.01 | 8.43E-01 | -0.98 | 8.37E-01 | -1.24 | 8.92E-01 |
| LIMS1     | -1.01 | 8.44E-01 | -0.26 | 6.02E-01 | -1.35 | 9.12E-01 |
| CLDN23    | -1.01 | 8.44E-01 | -1.15 | 8.75E-01 | -0.18 | 5.72E-01 |
| TBX20     | -1.01 | 8.44E-01 | -0.96 | 8.33E-01 | -0.54 | 7.06E-01 |
| ZNF93     | -1.01 | 8.44E-01 | -0.21 | 5.83E-01 | -0.34 | 6.35E-01 |
| GANC      | -1.01 | 8.44E-01 | -0.46 | 6.79E-01 | -0.92 | 8.20E-01 |
| 43352     | -1.01 | 8.44E-01 | -1.31 | 9.04E-01 | -0.95 | 8.29E-01 |
| SLC30A10  | -1.01 | 8.44E-01 | -1.21 | 8.87E-01 | -0.83 | 7.98E-01 |
| ATOH1     | -1.01 | 8.44E-01 | -0.12 | 5.46E-01 | 0.42  | 3.38E-01 |
| SLC35D2   | -1.01 | 8.44E-01 | -0.04 | 5.17E-01 | 1.09  | 1.37E-01 |
| EIF4ENIF1 | -1.01 | 8.44E-01 | -0.76 | 7.76E-01 | -0.42 | 6.64E-01 |
| UBAP1L    | -1.01 | 8.44E-01 | -1.09 | 8.61E-01 | -0.34 | 6.32E-01 |
| TONSL     | -1.01 | 8.44E-01 | -0.02 | 5.06E-01 | 0.03  | 4.87E-01 |
| PABPC4L   | -1.01 | 8.44E-01 | -0.95 | 8.28E-01 | -1.28 | 8.99E-01 |
| FLRT1     | -1.01 | 8.44E-01 | 0.31  | 3.78E-01 | 0.22  | 4.14E-01 |
| C8orf33   | -1.01 | 8.44E-01 | 0.00  | 5.00E-01 | 0.54  | 2.95E-01 |
| KCNA4     | -1.01 | 8.44E-01 | -2.59 | 9.95E-01 | 0.16  | 4.38E-01 |
| SLC4A7    | -1.01 | 8.44E-01 | -0.59 | 7.23E-01 | -1.04 | 8.50E-01 |
| RABL6     | -1.01 | 8.45E-01 | -0.37 | 6.43E-01 | -1.12 | 8.70E-01 |



|           |       |          |       |          |       |          |
|-----------|-------|----------|-------|----------|-------|----------|
| C10orf105 | -1.01 | 8.45E-01 | 0.12  | 4.51E-01 | -0.97 | 8.33E-01 |
| ZNF493    | -1.01 | 8.45E-01 | -0.67 | 7.48E-01 | -0.96 | 8.32E-01 |
| SLC46A2   | -1.01 | 8.45E-01 | 0.08  | 4.70E-01 | -1.93 | 9.73E-01 |
| LGALS2    | -1.01 | 8.45E-01 | -1.10 | 8.64E-01 | -0.87 | 8.07E-01 |
| TEX30     | -1.01 | 8.45E-01 | -0.95 | 8.29E-01 | -0.05 | 5.22E-01 |
| OR5L2     | -1.01 | 8.45E-01 | -0.90 | 8.17E-01 | -0.41 | 6.58E-01 |
| ARID1A    | -1.02 | 8.45E-01 | 0.62  | 2.67E-01 | 1.61  | 5.37E-02 |
| PARP1     | -1.02 | 8.45E-01 | -0.74 | 7.70E-01 | -0.86 | 8.05E-01 |
| CMYA5     | -1.02 | 8.45E-01 | -1.99 | 9.77E-01 | -0.64 | 7.38E-01 |
| VPS28     | -1.02 | 8.45E-01 | 0.10  | 4.62E-01 | -0.40 | 6.56E-01 |
| NFYB      | -1.02 | 8.45E-01 | -1.73 | 9.58E-01 | 0.11  | 4.57E-01 |
| B4GALT3   | -1.02 | 8.45E-01 | 0.83  | 2.04E-01 | 0.91  | 1.82E-01 |
| SEL1L     | -1.02 | 8.45E-01 | -0.05 | 5.21E-01 | -1.00 | 8.42E-01 |
| LRIT1     | -1.02 | 8.45E-01 | -0.25 | 5.98E-01 | -0.71 | 7.60E-01 |
| CAPS2     | -1.02 | 8.45E-01 | -0.74 | 7.71E-01 | -1.29 | 9.02E-01 |
| RNASE12   | -1.02 | 8.46E-01 | -0.90 | 8.17E-01 | -1.44 | 9.24E-01 |
| GRIN3B    | -1.02 | 8.46E-01 | -0.75 | 7.74E-01 | -0.57 | 7.17E-01 |
| TENM3     | -1.02 | 8.46E-01 | -0.78 | 7.83E-01 | 0.20  | 4.23E-01 |
| CLDN6     | -1.02 | 8.46E-01 | -0.40 | 6.55E-01 | -1.82 | 9.65E-01 |
| CEP44     | -1.02 | 8.46E-01 | -1.95 | 9.75E-01 | -0.11 | 5.45E-01 |
| CYP2B6    | -1.02 | 8.46E-01 | -0.57 | 7.17E-01 | -0.39 | 6.53E-01 |
| MISP      | -1.02 | 8.46E-01 | -0.11 | 5.43E-01 | -0.57 | 7.14E-01 |
| LIN28A    | -1.02 | 8.46E-01 | -0.39 | 6.53E-01 | -0.85 | 8.02E-01 |
| NOL10     | -1.02 | 8.46E-01 | -0.19 | 5.77E-01 | -0.19 | 5.75E-01 |
| ZNF850    | -1.02 | 8.46E-01 | 0.08  | 4.70E-01 | -0.26 | 6.04E-01 |
| MS4A7     | -1.02 | 8.46E-01 | 0.42  | 3.37E-01 | 0.28  | 3.89E-01 |
| PMPCB     | -1.02 | 8.46E-01 | -1.04 | 8.51E-01 | -0.25 | 5.98E-01 |
| CLIP1     | -1.02 | 8.47E-01 | -0.44 | 6.69E-01 | -1.15 | 8.74E-01 |
| GPATCH3   | -1.02 | 8.47E-01 | 0.34  | 3.65E-01 | 1.53  | 6.27E-02 |
| SDF4      | -1.02 | 8.47E-01 | -1.22 | 8.88E-01 | -0.98 | 8.37E-01 |
| CCDC8     | -1.02 | 8.47E-01 | -1.45 | 9.27E-01 | 0.00  | 4.98E-01 |

|          |       |          |       |          |       |          |
|----------|-------|----------|-------|----------|-------|----------|
| FLVCR1   | -1.02 | 8.47E-01 | -0.51 | 6.96E-01 | 0.03  | 4.88E-01 |
| IRAK4    | -1.02 | 8.47E-01 | -0.38 | 6.48E-01 | -0.92 | 8.21E-01 |
| ASNS     | -1.02 | 8.47E-01 | -1.83 | 9.67E-01 | 0.13  | 4.50E-01 |
| RDH12    | -1.02 | 8.47E-01 | -0.62 | 7.31E-01 | -1.58 | 9.43E-01 |
| SVOP     | -1.02 | 8.47E-01 | -2.71 | 9.97E-01 | 1.06  | 1.44E-01 |
| IL22RA1  | -1.02 | 8.47E-01 | -0.79 | 7.87E-01 | -1.17 | 8.79E-01 |
| UGT1A8   | -1.02 | 8.47E-01 | -0.60 | 7.26E-01 | -0.09 | 5.35E-01 |
| DPPA5    | -1.02 | 8.47E-01 | -0.55 | 7.08E-01 | 0.01  | 4.97E-01 |
| PDE4DIP  | -1.02 | 8.47E-01 | -0.53 | 7.02E-01 | -0.11 | 5.43E-01 |
| MTPAP    | -1.02 | 8.47E-01 | -1.41 | 9.21E-01 | -0.11 | 5.45E-01 |
| FAM53C   | -1.02 | 8.47E-01 | -0.03 | 5.11E-01 | 1.73  | 4.19E-02 |
| PRSS12   | -1.02 | 8.47E-01 | -0.23 | 5.91E-01 | -1.22 | 8.88E-01 |
| PTX3     | -1.03 | 8.47E-01 | -0.44 | 6.71E-01 | -1.02 | 8.47E-01 |
| ANKRD36C | -1.03 | 8.47E-01 | -1.16 | 8.78E-01 | -0.55 | 7.10E-01 |
| UBL7     | -1.03 | 8.47E-01 | -0.87 | 8.07E-01 | -0.63 | 7.35E-01 |
| OOSP1    | -1.03 | 8.47E-01 | -0.42 | 6.64E-01 | -0.23 | 5.90E-01 |
| ANKS1B   | -1.03 | 8.47E-01 | 0.09  | 4.64E-01 | -0.61 | 7.29E-01 |
| LRRC17   | -1.03 | 8.48E-01 | -0.95 | 8.30E-01 | -0.78 | 7.82E-01 |
| ICAM1    | -1.03 | 8.48E-01 | -0.29 | 6.15E-01 | -0.06 | 5.22E-01 |
| HOXB7    | -1.03 | 8.48E-01 | -0.32 | 6.26E-01 | -2.04 | 9.79E-01 |
| ZNF671   | -1.03 | 8.48E-01 | -1.69 | 9.55E-01 | -0.14 | 5.57E-01 |
| KAT2B    | -1.03 | 8.48E-01 | -1.42 | 9.22E-01 | -0.58 | 7.17E-01 |
| RAD51AP1 | -1.03 | 8.48E-01 | 0.11  | 4.57E-01 | -0.61 | 7.27E-01 |
| ANO6     | -1.03 | 8.48E-01 | -0.92 | 8.22E-01 | -0.25 | 5.98E-01 |
| CSF1     | -1.03 | 8.48E-01 | -0.59 | 7.21E-01 | 0.44  | 3.32E-01 |
| CRAT     | -1.03 | 8.48E-01 | -0.51 | 6.95E-01 | -0.08 | 5.32E-01 |
| COX7A2   | -1.03 | 8.48E-01 | -1.03 | 8.48E-01 | 0.45  | 3.25E-01 |
| FAM86C1  | -1.03 | 8.48E-01 | -0.27 | 6.07E-01 | -1.83 | 9.66E-01 |
| NPFFR2   | -1.03 | 8.48E-01 | -0.11 | 5.45E-01 | 1.36  | 8.68E-02 |
| CLK3     | -1.03 | 8.48E-01 | -1.08 | 8.61E-01 | -0.74 | 7.71E-01 |
| LEPROTL1 | -1.03 | 8.49E-01 | -0.48 | 6.84E-01 | -0.88 | 8.12E-01 |

|              |       |          |       |          |       |          |
|--------------|-------|----------|-------|----------|-------|----------|
| TCP1         | -1.03 | 8.49E-01 | 0.57  | 2.83E-01 | -0.22 | 5.88E-01 |
| CD244        | -1.03 | 8.49E-01 | -0.82 | 7.93E-01 | -1.14 | 8.73E-01 |
| POLR1B       | -1.03 | 8.49E-01 | -1.21 | 8.88E-01 | 0.00  | 5.00E-01 |
| EMC3         | -1.03 | 8.49E-01 | -0.23 | 5.91E-01 | 0.07  | 4.70E-01 |
| FAU          | -1.03 | 8.49E-01 | 1.52  | 6.48E-02 | 1.34  | 9.00E-02 |
| TSR3         | -1.03 | 8.49E-01 | -0.25 | 5.98E-01 | 0.27  | 3.92E-01 |
| SLC25A10     | -1.03 | 8.49E-01 | -1.15 | 8.75E-01 | -0.80 | 7.87E-01 |
| SLC25A10     | -1.03 | 8.49E-01 | -1.15 | 8.75E-01 | -0.80 | 7.87E-01 |
| MUC13        | -1.03 | 8.49E-01 | -1.09 | 8.62E-01 | -0.46 | 6.79E-01 |
| GAD2         | -1.03 | 8.49E-01 | -0.62 | 7.33E-01 | -0.73 | 7.67E-01 |
| CPNE4        | -1.03 | 8.49E-01 | -1.88 | 9.70E-01 | -1.10 | 8.65E-01 |
| TLR9         | -1.03 | 8.49E-01 | -0.24 | 5.93E-01 | 0.00  | 4.99E-01 |
| TEN1         | -1.03 | 8.49E-01 | -0.15 | 5.60E-01 | 0.94  | 1.73E-01 |
| RBFOX3       | -1.03 | 8.49E-01 | -0.60 | 7.24E-01 | -1.07 | 8.58E-01 |
| PTGER4       | -1.03 | 8.49E-01 | -0.79 | 7.85E-01 | -0.77 | 7.78E-01 |
| CATSPER2     | -1.03 | 8.49E-01 | -0.34 | 6.32E-01 | -0.90 | 8.17E-01 |
| LRAT         | -1.03 | 8.49E-01 | -0.87 | 8.07E-01 | 0.26  | 3.96E-01 |
| TRPS1        | -1.03 | 8.49E-01 | 0.08  | 4.69E-01 | 1.33  | 9.14E-02 |
| WWC2         | -1.03 | 8.49E-01 | -0.67 | 7.49E-01 | -1.45 | 9.27E-01 |
| UGT1A1       | -1.03 | 8.49E-01 | 0.41  | 3.40E-01 | -0.56 | 7.13E-01 |
| AHCTF1       | -1.03 | 8.49E-01 | -0.76 | 7.77E-01 | -0.79 | 7.86E-01 |
| SOSTDC1      | -1.03 | 8.49E-01 | -0.63 | 7.36E-01 | -0.47 | 6.82E-01 |
| CTD-3088G3.8 | -1.03 | 8.49E-01 | -1.60 | 9.45E-01 | -1.26 | 8.97E-01 |
| ARPC3        | -1.03 | 8.50E-01 | -1.46 | 9.28E-01 | -1.57 | 9.42E-01 |
| GART         | -1.03 | 8.50E-01 | 0.47  | 3.20E-01 | -0.64 | 7.37E-01 |
| ARHGAP30     | -1.03 | 8.50E-01 | -0.66 | 7.47E-01 | 1.02  | 1.55E-01 |
| CEACAM18     | -1.03 | 8.50E-01 | -1.24 | 8.92E-01 | -0.94 | 8.27E-01 |
| SULT1C3      | -1.04 | 8.50E-01 | -0.89 | 8.12E-01 | 0.36  | 3.59E-01 |
| DDT          | -1.04 | 8.50E-01 | -0.90 | 8.17E-01 | -0.40 | 6.56E-01 |
| SNX1         | -1.04 | 8.50E-01 | -1.64 | 9.49E-01 | 0.29  | 3.86E-01 |
| NMBR         | -1.04 | 8.50E-01 | -0.92 | 8.21E-01 | 0.01  | 4.95E-01 |

|            |       |          |       |          |       |          |
|------------|-------|----------|-------|----------|-------|----------|
| NSRP1      | -1.04 | 8.50E-01 | -0.85 | 8.02E-01 | -0.92 | 8.22E-01 |
| PIGW       | -1.04 | 8.50E-01 | -0.96 | 8.33E-01 | -1.34 | 9.10E-01 |
| PEX26      | -1.04 | 8.50E-01 | -0.53 | 7.03E-01 | 0.42  | 3.38E-01 |
| PLCD3      | -1.04 | 8.50E-01 | -1.30 | 9.03E-01 | -0.52 | 7.00E-01 |
| OR7G2      | -1.04 | 8.50E-01 | 0.08  | 4.67E-01 | -0.79 | 7.86E-01 |
| C19orf33   | -1.04 | 8.50E-01 | -0.30 | 6.20E-01 | -0.39 | 6.53E-01 |
| HIRIP3     | -1.04 | 8.50E-01 | -1.13 | 8.71E-01 | -1.68 | 9.54E-01 |
| VSIG8      | -1.04 | 8.50E-01 | -1.82 | 9.66E-01 | -0.26 | 6.04E-01 |
| GRM4       | -1.04 | 8.50E-01 | -2.21 | 9.86E-01 | -0.46 | 6.76E-01 |
| UBE2D1     | -1.04 | 8.51E-01 | -0.06 | 5.24E-01 | 0.63  | 2.63E-01 |
| MUC15      | -1.04 | 8.51E-01 | -1.55 | 9.40E-01 | -0.78 | 7.83E-01 |
| DCLRE1B    | -1.04 | 8.51E-01 | 0.23  | 4.07E-01 | -0.33 | 6.31E-01 |
| PPIL4      | -1.04 | 8.51E-01 | -0.43 | 6.66E-01 | -0.46 | 6.78E-01 |
| HNF4A      | -1.04 | 8.51E-01 | -0.23 | 5.89E-01 | -0.43 | 6.65E-01 |
| MSANTD4    | -1.04 | 8.51E-01 | -0.44 | 6.70E-01 | 0.75  | 2.27E-01 |
| TXNL1      | -1.04 | 8.51E-01 | 1.24  | 1.07E-01 | 0.36  | 3.59E-01 |
| FAM102B    | -1.04 | 8.51E-01 | -0.93 | 8.25E-01 | -0.62 | 7.33E-01 |
| C4orf21    | -1.04 | 8.51E-01 | 0.40  | 3.44E-01 | 0.33  | 3.71E-01 |
| HACE1      | -1.04 | 8.51E-01 | -0.94 | 8.27E-01 | -0.66 | 7.46E-01 |
| NUFIP1     | -1.04 | 8.51E-01 | -0.29 | 6.13E-01 | -0.62 | 7.32E-01 |
| GADD45GIP1 | -1.04 | 8.51E-01 | -0.22 | 5.88E-01 | 0.60  | 2.73E-01 |
| SNCB       | -1.04 | 8.51E-01 | -1.52 | 9.36E-01 | -0.56 | 7.11E-01 |
| SMPD3      | -1.04 | 8.51E-01 | -1.11 | 8.66E-01 | 0.30  | 3.84E-01 |
| ACER1      | -1.04 | 8.51E-01 | -0.28 | 6.11E-01 | -0.98 | 8.36E-01 |
| AKR7A2     | -1.04 | 8.51E-01 | -1.04 | 8.52E-01 | 0.44  | 3.29E-01 |
| SPCS3      | -1.04 | 8.51E-01 | -1.44 | 9.25E-01 | -0.30 | 6.17E-01 |
| ZFP36L1    | -1.04 | 8.51E-01 | -0.70 | 7.57E-01 | -1.11 | 8.68E-01 |
| C9orf89    | -1.04 | 8.51E-01 | -1.12 | 8.69E-01 | -0.30 | 6.18E-01 |
| TPSG1      | -1.04 | 8.51E-01 | 1.06  | 1.44E-01 | 0.25  | 4.00E-01 |
| ZNF212     | -1.04 | 8.52E-01 | 1.08  | 1.40E-01 | 0.12  | 4.52E-01 |
| LRIF1      | -1.04 | 8.52E-01 | -0.53 | 7.03E-01 | 0.08  | 4.70E-01 |

|             |       |          |       |          |       |          |
|-------------|-------|----------|-------|----------|-------|----------|
| HLX         | -1.04 | 8.52E-01 | -0.08 | 5.34E-01 | -0.88 | 8.09E-01 |
| PRKACA      | -1.04 | 8.52E-01 | -0.36 | 6.39E-01 | -0.71 | 7.61E-01 |
| ZSWIM3      | -1.04 | 8.52E-01 | -0.83 | 7.96E-01 | -0.82 | 7.94E-01 |
| PRPF4       | -1.04 | 8.52E-01 | -0.14 | 5.54E-01 | 0.60  | 2.74E-01 |
| NFKBIB      | -1.04 | 8.52E-01 | -1.09 | 8.62E-01 | -1.14 | 8.73E-01 |
| C14orf1     | -1.04 | 8.52E-01 | -1.99 | 9.77E-01 | 0.01  | 4.95E-01 |
| PREB        | -1.04 | 8.52E-01 | -0.25 | 6.00E-01 | -0.77 | 7.79E-01 |
| IFNW1       | -1.04 | 8.52E-01 | 0.32  | 3.73E-01 | 0.76  | 2.23E-01 |
| CTC-534A2.2 | -1.04 | 8.52E-01 | -1.41 | 9.21E-01 | -0.27 | 6.06E-01 |
| LMBRD2      | -1.04 | 8.52E-01 | 0.03  | 4.87E-01 | 0.85  | 1.98E-01 |
| CCDC183     | -1.05 | 8.52E-01 | -1.23 | 8.91E-01 | -1.41 | 9.21E-01 |
| PTPDC1      | -1.05 | 8.52E-01 | 0.25  | 4.02E-01 | -1.13 | 8.70E-01 |
| CDNF        | -1.05 | 8.52E-01 | -1.35 | 9.12E-01 | -0.35 | 6.36E-01 |
| FAM118B     | -1.05 | 8.52E-01 | -0.23 | 5.90E-01 | 0.40  | 3.43E-01 |
| TMEM181     | -1.05 | 8.52E-01 | -0.65 | 7.42E-01 | -0.54 | 7.04E-01 |
| RBM5        | -1.05 | 8.52E-01 | 1.33  | 9.15E-02 | 0.47  | 3.20E-01 |
| DEPDC5      | -1.05 | 8.52E-01 | -0.60 | 7.25E-01 | -0.61 | 7.30E-01 |
| HRH3        | -1.05 | 8.52E-01 | 0.89  | 1.86E-01 | -0.55 | 7.08E-01 |
| TIGD3       | -1.05 | 8.52E-01 | 0.44  | 3.30E-01 | -0.23 | 5.92E-01 |
| DEFB108B    | -1.05 | 8.52E-01 | -0.61 | 7.28E-01 | -1.27 | 8.98E-01 |
| LHFP        | -1.05 | 8.53E-01 | -0.20 | 5.80E-01 | -1.32 | 9.06E-01 |
| MRPS7       | -1.05 | 8.53E-01 | -0.04 | 5.17E-01 | -0.69 | 7.54E-01 |
| CDC26       | -1.05 | 8.53E-01 | -0.04 | 5.17E-01 | 1.54  | 6.21E-02 |
| ANGPT1      | -1.05 | 8.53E-01 | 1.08  | 1.41E-01 | -0.43 | 6.68E-01 |
| UIMC1       | -1.05 | 8.53E-01 | -0.45 | 6.74E-01 | -2.36 | 9.91E-01 |
| CSNK1G2     | -1.05 | 8.53E-01 | 0.65  | 2.56E-01 | -0.85 | 8.03E-01 |
| ADRM1       | -1.05 | 8.53E-01 | -0.34 | 6.32E-01 | 0.35  | 3.63E-01 |
| B3GALT1     | -1.05 | 8.53E-01 | -1.36 | 9.14E-01 | 0.41  | 3.42E-01 |
| SMCO1       | -1.05 | 8.53E-01 | -1.99 | 9.77E-01 | -0.81 | 7.92E-01 |
| PRR21       | -1.05 | 8.53E-01 | 0.03  | 4.90E-01 | 0.70  | 2.43E-01 |
| ANKDD1A     | -1.05 | 8.53E-01 | -0.67 | 7.50E-01 | -0.61 | 7.30E-01 |

|           |       |          |       |          |       |          |
|-----------|-------|----------|-------|----------|-------|----------|
| SMPDL3B   | -1.05 | 8.53E-01 | -1.40 | 9.20E-01 | 0.24  | 4.04E-01 |
| RPL21     | -1.05 | 8.54E-01 | -1.13 | 8.71E-01 | -0.12 | 5.49E-01 |
| PTPRG     | -1.05 | 8.54E-01 | 0.21  | 4.16E-01 | -0.38 | 6.49E-01 |
| C20orf166 | -1.05 | 8.54E-01 | 0.56  | 2.88E-01 | -1.07 | 8.58E-01 |
| CTDSPL    | -1.05 | 8.54E-01 | -1.06 | 8.55E-01 | -0.28 | 6.10E-01 |
| PDE1B     | -1.05 | 8.54E-01 | -0.12 | 5.47E-01 | 0.36  | 3.59E-01 |
| UBA5      | -1.05 | 8.54E-01 | -0.85 | 8.03E-01 | -0.67 | 7.49E-01 |
| SGSM3     | -1.05 | 8.54E-01 | 0.39  | 3.48E-01 | -0.65 | 7.43E-01 |
| GSK3B     | -1.05 | 8.54E-01 | 0.37  | 3.54E-01 | -1.00 | 8.42E-01 |
| BRPF1     | -1.05 | 8.54E-01 | -0.45 | 6.74E-01 | 0.45  | 3.28E-01 |
| ZMYND11   | -1.05 | 8.54E-01 | -1.22 | 8.90E-01 | -0.74 | 7.71E-01 |
| CNTD1     | -1.06 | 8.54E-01 | -0.63 | 7.37E-01 | -0.85 | 8.03E-01 |
| CROT      | -1.06 | 8.54E-01 | -0.42 | 6.64E-01 | -0.80 | 7.88E-01 |
| RNF24     | -1.06 | 8.54E-01 | -0.43 | 6.65E-01 | -1.70 | 9.56E-01 |
| SLC23A1   | -1.06 | 8.55E-01 | -1.02 | 8.46E-01 | -0.73 | 7.68E-01 |
| UGGT1     | -1.06 | 8.55E-01 | -0.55 | 7.08E-01 | -1.28 | 8.99E-01 |
| TEKT5     | -1.06 | 8.55E-01 | -0.30 | 6.16E-01 | -0.70 | 7.57E-01 |
| IRF2      | -1.06 | 8.55E-01 | 0.39  | 3.50E-01 | -0.85 | 8.02E-01 |
| ZCRB1     | -1.06 | 8.55E-01 | -0.10 | 5.41E-01 | -0.52 | 7.00E-01 |
| BCL7B     | -1.06 | 8.55E-01 | -1.04 | 8.50E-01 | -0.86 | 8.06E-01 |
| ANKRD45   | -1.06 | 8.55E-01 | -0.39 | 6.51E-01 | -0.73 | 7.69E-01 |
| TADA3     | -1.06 | 8.55E-01 | -0.43 | 6.67E-01 | -1.12 | 8.69E-01 |
| TMEM8A    | -1.06 | 8.55E-01 | -0.50 | 6.93E-01 | -0.34 | 6.34E-01 |
| TFB1M     | -1.06 | 8.55E-01 | -0.50 | 6.93E-01 | -0.51 | 6.94E-01 |
| CPNE7     | -1.06 | 8.55E-01 | 0.58  | 2.83E-01 | 0.07  | 4.71E-01 |
| ZNF879    | -1.06 | 8.55E-01 | -0.45 | 6.72E-01 | 0.01  | 4.95E-01 |
| HOXC5     | -1.06 | 8.55E-01 | -0.11 | 5.43E-01 | -0.60 | 7.24E-01 |
| CCZ1      | -1.06 | 8.55E-01 | -0.25 | 5.98E-01 | 0.55  | 2.92E-01 |
| SLC25A1   | -1.06 | 8.55E-01 | -0.26 | 6.02E-01 | -1.42 | 9.23E-01 |
| PDGFC     | -1.06 | 8.55E-01 | -0.55 | 7.10E-01 | -1.52 | 9.36E-01 |
| GIPC3     | -1.06 | 8.56E-01 | -1.19 | 8.83E-01 | -0.76 | 7.77E-01 |

|               |       |          |       |          |       |          |
|---------------|-------|----------|-------|----------|-------|----------|
| SMAD3         | -1.06 | 8.56E-01 | 0.73  | 2.33E-01 | -1.10 | 8.65E-01 |
| DYRK2         | -1.06 | 8.56E-01 | -0.74 | 7.71E-01 | -0.54 | 7.06E-01 |
| JUN           | -1.06 | 8.56E-01 | 0.09  | 4.65E-01 | 0.51  | 3.04E-01 |
| RP11-162A12.2 | -1.06 | 8.56E-01 | 0.84  | 2.01E-01 | -0.15 | 5.58E-01 |
| BATF3         | -1.06 | 8.56E-01 | -0.25 | 6.00E-01 | 0.07  | 4.73E-01 |
| PODN          | -1.06 | 8.56E-01 | -0.73 | 7.67E-01 | -0.88 | 8.12E-01 |
| TSSC4         | -1.06 | 8.56E-01 | -0.28 | 6.09E-01 | 0.04  | 4.85E-01 |
| HMSD          | -1.06 | 8.56E-01 | -0.22 | 5.89E-01 | 0.02  | 4.93E-01 |
| OR8B8         | -1.06 | 8.56E-01 | -0.60 | 7.24E-01 | 0.00  | 5.01E-01 |
| HTRA1         | -1.06 | 8.56E-01 | -1.33 | 9.09E-01 | 0.03  | 4.87E-01 |
| CCNE2         | -1.06 | 8.56E-01 | -1.60 | 9.45E-01 | -1.14 | 8.73E-01 |
| ADM2          | -1.06 | 8.56E-01 | -1.40 | 9.19E-01 | -1.30 | 9.03E-01 |
| ZNF233        | -1.06 | 8.56E-01 | -1.29 | 9.02E-01 | -0.57 | 7.16E-01 |
| ITGA9         | -1.06 | 8.56E-01 | -1.19 | 8.84E-01 | -0.05 | 5.22E-01 |
| PAX8          | -1.06 | 8.56E-01 | 0.32  | 3.73E-01 | 0.30  | 3.82E-01 |
| SLC46A1       | -1.06 | 8.56E-01 | -0.94 | 8.27E-01 | -0.39 | 6.51E-01 |
| ALDH3B2       | -1.07 | 8.57E-01 | 0.07  | 4.74E-01 | -1.23 | 8.91E-01 |
| LYAR          | -1.07 | 8.57E-01 | -0.49 | 6.86E-01 | -1.13 | 8.72E-01 |
| POLL          | -1.07 | 8.57E-01 | 0.27  | 3.92E-01 | 0.81  | 2.09E-01 |
| PDLIM3        | -1.07 | 8.57E-01 | -0.58 | 7.21E-01 | -0.88 | 8.10E-01 |
| POLA2         | -1.07 | 8.57E-01 | -0.57 | 7.15E-01 | -1.15 | 8.76E-01 |
| NAT8L         | -1.07 | 8.57E-01 | -0.38 | 6.47E-01 | -0.33 | 6.29E-01 |
| EIF1          | -1.07 | 8.57E-01 | -0.11 | 5.46E-01 | -1.04 | 8.50E-01 |
| FOXA1         | -1.07 | 8.57E-01 | -1.71 | 9.57E-01 | -0.42 | 6.64E-01 |
| CCDC17        | -1.07 | 8.57E-01 | 0.21  | 4.17E-01 | 0.34  | 3.67E-01 |
| GRM7          | -1.07 | 8.57E-01 | -1.90 | 9.72E-01 | 0.88  | 1.89E-01 |
| NUDT21        | -1.07 | 8.57E-01 | -1.12 | 8.69E-01 | 1.18  | 1.18E-01 |
| APOBEC3C      | -1.07 | 8.57E-01 | -0.15 | 5.60E-01 | -1.65 | 9.51E-01 |
| DPYSL3        | -1.07 | 8.58E-01 | -1.30 | 9.04E-01 | -0.61 | 7.28E-01 |
| VANGL1        | -1.07 | 8.58E-01 | -0.49 | 6.87E-01 | -0.63 | 7.36E-01 |
| OR56B3P       | -1.07 | 8.58E-01 | -0.32 | 6.26E-01 | 0.37  | 3.57E-01 |

|               |       |          |       |          |       |          |
|---------------|-------|----------|-------|----------|-------|----------|
| ZNF843        | -1.07 | 8.58E-01 | -0.77 | 7.79E-01 | -0.17 | 5.67E-01 |
| MMP9          | -1.07 | 8.58E-01 | -1.42 | 9.22E-01 | 0.28  | 3.89E-01 |
| RP11-144F15.1 | -1.07 | 8.58E-01 | -0.56 | 7.11E-01 | -0.01 | 5.04E-01 |
| ELOVL6        | -1.07 | 8.58E-01 | -0.89 | 8.13E-01 | -1.29 | 9.02E-01 |
| C1QBP         | -1.07 | 8.58E-01 | -0.57 | 7.16E-01 | 0.79  | 2.15E-01 |
| AQP10         | -1.07 | 8.58E-01 | -1.09 | 8.63E-01 | -0.49 | 6.88E-01 |
| CEBPG         | -1.07 | 8.58E-01 | -1.45 | 9.27E-01 | -0.92 | 8.21E-01 |
| SLC25A33      | -1.07 | 8.58E-01 | 0.08  | 4.68E-01 | -0.69 | 7.56E-01 |
| GRIN2D        | -1.07 | 8.58E-01 | -1.12 | 8.68E-01 | -0.33 | 6.28E-01 |
| DCSTAMP       | -1.07 | 8.58E-01 | -0.68 | 7.51E-01 | 0.16  | 4.35E-01 |
| WFDC1         | -1.07 | 8.58E-01 | -0.29 | 6.14E-01 | -0.62 | 7.31E-01 |
| OR4D11        | -1.07 | 8.58E-01 | 0.94  | 1.72E-01 | 0.80  | 2.11E-01 |
| FBXO27        | -1.07 | 8.58E-01 | -1.56 | 9.41E-01 | -0.99 | 8.39E-01 |
| GHRH          | -1.07 | 8.58E-01 | -0.19 | 5.75E-01 | -1.35 | 9.11E-01 |
| CHST12        | -1.07 | 8.58E-01 | -0.53 | 7.00E-01 | 0.08  | 4.67E-01 |
| POLR3H        | -1.07 | 8.58E-01 | -0.07 | 5.28E-01 | -0.50 | 6.92E-01 |
| EMCN          | -1.07 | 8.58E-01 | -0.73 | 7.67E-01 | 0.51  | 3.06E-01 |
| ADAD1         | -1.07 | 8.58E-01 | -0.80 | 7.87E-01 | 0.84  | 2.00E-01 |
| UTF1          | -1.07 | 8.58E-01 | -0.38 | 6.49E-01 | -0.57 | 7.16E-01 |
| SCN1B         | -1.07 | 8.59E-01 | -1.12 | 8.68E-01 | -1.07 | 8.58E-01 |
| KLHL3         | -1.07 | 8.59E-01 | -1.62 | 9.48E-01 | -0.11 | 5.42E-01 |
| PDRG1         | -1.07 | 8.59E-01 | -1.28 | 9.00E-01 | -1.57 | 9.41E-01 |
| FYN           | -1.07 | 8.59E-01 | -1.21 | 8.88E-01 | -1.45 | 9.26E-01 |
| ITIH2         | -1.07 | 8.59E-01 | -1.07 | 8.58E-01 | 0.64  | 2.62E-01 |
| WFIKKN2       | -1.07 | 8.59E-01 | -1.36 | 9.13E-01 | -1.16 | 8.78E-01 |
| SYNGR4        | -1.07 | 8.59E-01 | 0.33  | 3.72E-01 | -1.51 | 9.34E-01 |
| CD79B         | -1.07 | 8.59E-01 | -0.76 | 7.75E-01 | -2.55 | 9.95E-01 |
| KCNH4         | -1.08 | 8.59E-01 | 1.12  | 1.31E-01 | 1.31  | 9.54E-02 |
| C19orf25      | -1.08 | 8.59E-01 | 0.42  | 3.36E-01 | -0.13 | 5.51E-01 |
| DNAJC18       | -1.08 | 8.59E-01 | -0.43 | 6.66E-01 | -0.58 | 7.20E-01 |
| RINT1         | -1.08 | 8.59E-01 | -0.74 | 7.69E-01 | -0.16 | 5.65E-01 |



|             |       |          |       |          |       |          |
|-------------|-------|----------|-------|----------|-------|----------|
| TJP2        | -1.08 | 8.59E-01 | -0.62 | 7.33E-01 | -0.63 | 7.37E-01 |
| TIMM17A     | -1.08 | 8.59E-01 | -0.35 | 6.36E-01 | -0.12 | 5.49E-01 |
| 43347       | -1.08 | 8.59E-01 | 0.35  | 3.63E-01 | -0.04 | 5.17E-01 |
| TTPA        | -1.08 | 8.59E-01 | -0.95 | 8.30E-01 | -0.79 | 7.84E-01 |
| DENND4C     | -1.08 | 8.59E-01 | -0.21 | 5.83E-01 | 0.58  | 2.82E-01 |
| CCDC54      | -1.08 | 8.59E-01 | -0.53 | 7.03E-01 | -0.52 | 6.99E-01 |
| PPA1        | -1.08 | 8.59E-01 | 0.67  | 2.53E-01 | 1.21  | 1.13E-01 |
| IFNA6       | -1.08 | 8.60E-01 | -1.99 | 9.77E-01 | -0.93 | 8.23E-01 |
| CYTIP       | -1.08 | 8.60E-01 | -0.48 | 6.85E-01 | -0.60 | 7.26E-01 |
| SMLR1       | -1.08 | 8.60E-01 | 0.04  | 4.84E-01 | 0.01  | 4.95E-01 |
| CD97        | -1.08 | 8.60E-01 | -0.08 | 5.30E-01 | 0.30  | 3.83E-01 |
| HEBP1       | -1.08 | 8.60E-01 | -1.05 | 8.54E-01 | 0.66  | 2.56E-01 |
| P4HA1       | -1.08 | 8.60E-01 | -0.56 | 7.13E-01 | -1.17 | 8.80E-01 |
| TMEM262     | -1.08 | 8.60E-01 | 1.40  | 8.01E-02 | 0.71  | 2.40E-01 |
| ARPC4-TTLL3 | -1.08 | 8.60E-01 | -0.87 | 8.07E-01 | 0.35  | 3.63E-01 |
| MANSC1      | -1.08 | 8.60E-01 | -0.78 | 7.81E-01 | -1.97 | 9.76E-01 |
| CRYBB3      | -1.08 | 8.60E-01 | -0.55 | 7.10E-01 | -1.84 | 9.67E-01 |
| SELT        | -1.08 | 8.60E-01 | 0.53  | 2.99E-01 | 0.00  | 5.01E-01 |
| SLC25A51    | -1.08 | 8.60E-01 | 1.31  | 9.52E-02 | 0.12  | 4.53E-01 |
| GAA         | -1.08 | 8.60E-01 | -0.53 | 7.02E-01 | -1.34 | 9.10E-01 |
| SLC9C2      | -1.08 | 8.60E-01 | 0.27  | 3.92E-01 | -1.06 | 8.55E-01 |
| PABPC1L     | -1.08 | 8.60E-01 | -0.77 | 7.80E-01 | -0.70 | 7.59E-01 |
| UCK1        | -1.08 | 8.60E-01 | -0.28 | 6.09E-01 | 0.63  | 2.65E-01 |
| PIDD        | -1.08 | 8.60E-01 | 0.04  | 4.84E-01 | 0.13  | 4.48E-01 |
| CDK5RAP2    | -1.08 | 8.60E-01 | -0.97 | 8.33E-01 | -1.24 | 8.92E-01 |
| ADH4        | -1.08 | 8.61E-01 | -0.53 | 7.03E-01 | -1.92 | 9.72E-01 |
| SLC3A1      | -1.08 | 8.61E-01 | -0.28 | 6.09E-01 | -0.31 | 6.23E-01 |
| SHISA4      | -1.08 | 8.61E-01 | -1.03 | 8.48E-01 | 0.41  | 3.41E-01 |
| VSTM2B      | -1.08 | 8.61E-01 | -1.34 | 9.09E-01 | 0.02  | 4.92E-01 |
| OR1L4       | -1.08 | 8.61E-01 | -1.00 | 8.42E-01 | -2.29 | 9.89E-01 |
| DCAKD       | -1.08 | 8.61E-01 | -1.03 | 8.49E-01 | -0.38 | 6.48E-01 |

|           |       |          |       |          |       |          |
|-----------|-------|----------|-------|----------|-------|----------|
| SPA17     | -1.08 | 8.61E-01 | -1.18 | 8.81E-01 | -0.66 | 7.44E-01 |
| MRRF      | -1.09 | 8.61E-01 | -0.52 | 6.99E-01 | -0.41 | 6.61E-01 |
| CYB5B     | -1.09 | 8.61E-01 | 0.17  | 4.32E-01 | -0.66 | 7.46E-01 |
| LUC7L     | -1.09 | 8.61E-01 | -0.89 | 8.14E-01 | 0.61  | 2.71E-01 |
| TOMM6     | -1.09 | 8.61E-01 | -1.80 | 9.64E-01 | -1.12 | 8.70E-01 |
| UNC5A     | -1.09 | 8.61E-01 | -0.19 | 5.77E-01 | -2.04 | 9.79E-01 |
| TMEM215   | -1.09 | 8.61E-01 | -0.37 | 6.43E-01 | -2.21 | 9.86E-01 |
| TAGLN2    | -1.09 | 8.61E-01 | -0.33 | 6.28E-01 | -0.31 | 6.23E-01 |
| PDIK1L    | -1.09 | 8.62E-01 | -2.02 | 9.78E-01 | -1.15 | 8.75E-01 |
| GALNT18   | -1.09 | 8.62E-01 | 0.25  | 4.01E-01 | 0.21  | 4.16E-01 |
| SDHA      | -1.09 | 8.62E-01 | -0.28 | 6.11E-01 | -0.10 | 5.41E-01 |
| SKIV2L2   | -1.09 | 8.62E-01 | -0.57 | 7.16E-01 | -0.06 | 5.25E-01 |
| ECD       | -1.09 | 8.62E-01 | -0.63 | 7.35E-01 | -1.26 | 8.97E-01 |
| GPR125    | -1.09 | 8.62E-01 | -1.03 | 8.48E-01 | -0.13 | 5.52E-01 |
| TRAF7     | -1.09 | 8.62E-01 | 0.07  | 4.72E-01 | -0.64 | 7.39E-01 |
| FUT10     | -1.09 | 8.62E-01 | -1.42 | 9.22E-01 | -1.22 | 8.89E-01 |
| MARS2     | -1.09 | 8.62E-01 | 0.05  | 4.81E-01 | -0.35 | 6.36E-01 |
| MFAP3     | -1.09 | 8.62E-01 | 0.44  | 3.30E-01 | 0.23  | 4.10E-01 |
| USH1G     | -1.09 | 8.62E-01 | -0.52 | 6.98E-01 | -0.97 | 8.34E-01 |
| ARL16     | -1.09 | 8.62E-01 | -0.87 | 8.08E-01 | -0.56 | 7.12E-01 |
| PLVAP     | -1.09 | 8.62E-01 | -0.16 | 5.65E-01 | -0.20 | 5.79E-01 |
| KRTAP13-4 | -1.09 | 8.62E-01 | -1.84 | 9.67E-01 | -0.32 | 6.25E-01 |
| BYSL      | -1.09 | 8.63E-01 | -1.11 | 8.67E-01 | -1.05 | 8.54E-01 |
| DUSP23    | -1.09 | 8.63E-01 | -0.60 | 7.26E-01 | -2.81 | 9.98E-01 |
| PTF1A     | -1.09 | 8.63E-01 | 0.29  | 3.86E-01 | 0.14  | 4.45E-01 |
| NDUFAF5   | -1.09 | 8.63E-01 | -0.84 | 8.00E-01 | 0.27  | 3.94E-01 |
| GLS2      | -1.09 | 8.63E-01 | -1.23 | 8.91E-01 | -1.59 | 9.44E-01 |
| RASSF2    | -1.09 | 8.63E-01 | 0.43  | 3.32E-01 | -1.06 | 8.56E-01 |
| SDHC      | -1.09 | 8.63E-01 | -0.38 | 6.47E-01 | -0.52 | 6.99E-01 |
| RAD9B     | -1.09 | 8.63E-01 | -0.85 | 8.03E-01 | -1.73 | 9.58E-01 |
| GEMIN6    | -1.09 | 8.63E-01 | -0.69 | 7.56E-01 | -0.56 | 7.14E-01 |

|            |       |          |       |          |       |          |
|------------|-------|----------|-------|----------|-------|----------|
| GPN3       | -1.09 | 8.63E-01 | -0.80 | 7.88E-01 | -1.80 | 9.64E-01 |
| IMPA2      | -1.09 | 8.63E-01 | -0.07 | 5.28E-01 | -1.09 | 8.61E-01 |
| C1orf220   | -1.09 | 8.63E-01 | 0.00  | 4.98E-01 | 0.42  | 3.37E-01 |
| AP1M1      | -1.09 | 8.63E-01 | -0.82 | 7.95E-01 | -0.93 | 8.25E-01 |
| AKT1S1     | -1.09 | 8.63E-01 | 0.21  | 4.16E-01 | -0.41 | 6.61E-01 |
| MROH7-TTC4 | -1.09 | 8.63E-01 | 1.33  | 9.19E-02 | 0.17  | 4.34E-01 |
| TNS4       | -1.09 | 8.63E-01 | -0.82 | 7.94E-01 | -1.05 | 8.52E-01 |
| ZNF780A    | -1.10 | 8.63E-01 | -0.95 | 8.30E-01 | -0.13 | 5.50E-01 |
| SHC2       | -1.10 | 8.63E-01 | -1.35 | 9.12E-01 | 0.03  | 4.89E-01 |
| TMEM104    | -1.10 | 8.63E-01 | -0.11 | 5.45E-01 | -0.69 | 7.55E-01 |
| CNOT6      | -1.10 | 8.63E-01 | 0.82  | 2.05E-01 | -0.01 | 5.05E-01 |
| TMED6      | -1.10 | 8.63E-01 | -0.14 | 5.57E-01 | 0.86  | 1.96E-01 |
| FILIP1L    | -1.10 | 8.64E-01 | -0.91 | 8.19E-01 | -0.31 | 6.21E-01 |
| KLHDC9     | -1.10 | 8.64E-01 | 0.68  | 2.49E-01 | 0.89  | 1.86E-01 |
| FAS        | -1.10 | 8.64E-01 | 0.51  | 3.04E-01 | -0.12 | 5.49E-01 |
| HEY1       | -1.10 | 8.64E-01 | 0.17  | 4.34E-01 | -0.90 | 8.16E-01 |
| LMAN1L     | -1.10 | 8.64E-01 | -1.93 | 9.73E-01 | 0.45  | 3.25E-01 |
| C22orf23   | -1.10 | 8.64E-01 | -1.31 | 9.04E-01 | -0.26 | 6.04E-01 |
| NFATC1     | -1.10 | 8.64E-01 | -0.42 | 6.63E-01 | -0.99 | 8.38E-01 |
| NUDCD1     | -1.10 | 8.64E-01 | 0.86  | 1.95E-01 | 0.38  | 3.54E-01 |
| A2ML1      | -1.10 | 8.64E-01 | -0.07 | 5.30E-01 | -1.10 | 8.65E-01 |
| FOXD2      | -1.10 | 8.64E-01 | -1.26 | 8.96E-01 | -1.79 | 9.63E-01 |
| EIF2AK1    | -1.10 | 8.64E-01 | -1.25 | 8.94E-01 | -0.18 | 5.73E-01 |
| LRMP       | -1.10 | 8.64E-01 | 1.19  | 1.18E-01 | -1.84 | 9.67E-01 |
| APOD       | -1.10 | 8.64E-01 | -1.08 | 8.59E-01 | 0.10  | 4.61E-01 |
| NELFCD     | -1.10 | 8.64E-01 | -1.41 | 9.21E-01 | -1.18 | 8.81E-01 |
| CCDC87     | -1.10 | 8.64E-01 | -0.12 | 5.49E-01 | -0.51 | 6.94E-01 |
| TRPC3      | -1.10 | 8.64E-01 | -0.93 | 8.24E-01 | 0.23  | 4.10E-01 |
| SERPINB10  | -1.10 | 8.64E-01 | -0.15 | 5.58E-01 | -0.16 | 5.65E-01 |
| PWWP2A     | -1.10 | 8.64E-01 | 0.19  | 4.23E-01 | 0.04  | 4.83E-01 |
| RHBDF1     | -1.10 | 8.64E-01 | -0.80 | 7.87E-01 | -1.42 | 9.22E-01 |

|            |       |          |       |          |       |          |
|------------|-------|----------|-------|----------|-------|----------|
| SPATS2L    | -1.10 | 8.64E-01 | 0.22  | 4.13E-01 | -0.01 | 5.02E-01 |
| ZNF286A    | -1.10 | 8.64E-01 | 0.46  | 3.25E-01 | 0.86  | 1.95E-01 |
| SIM2       | -1.10 | 8.64E-01 | -1.53 | 9.37E-01 | -0.65 | 7.42E-01 |
| SLC22A6    | -1.10 | 8.65E-01 | -0.07 | 5.27E-01 | -0.40 | 6.55E-01 |
| TMEM14A    | -1.10 | 8.65E-01 | -1.80 | 9.64E-01 | -0.48 | 6.83E-01 |
| PAK1       | -1.10 | 8.65E-01 | -0.12 | 5.47E-01 | -0.85 | 8.03E-01 |
| LYRM1      | -1.10 | 8.65E-01 | -0.41 | 6.60E-01 | -0.33 | 6.31E-01 |
| FCHO2      | -1.10 | 8.65E-01 | -0.40 | 6.56E-01 | -1.03 | 8.49E-01 |
| NEUROG1    | -1.10 | 8.65E-01 | -0.24 | 5.95E-01 | 0.42  | 3.38E-01 |
| CHD7       | -1.10 | 8.65E-01 | 0.22  | 4.14E-01 | -0.50 | 6.91E-01 |
| ZEB1       | -1.10 | 8.65E-01 | -0.48 | 6.83E-01 | -0.78 | 7.83E-01 |
| GLIPR1     | -1.10 | 8.65E-01 | -0.75 | 7.73E-01 | -0.95 | 8.29E-01 |
| ZNF419     | -1.10 | 8.65E-01 | -0.84 | 7.99E-01 | -0.90 | 8.17E-01 |
| TRIM16L    | -1.10 | 8.65E-01 | -1.09 | 8.61E-01 | -0.95 | 8.30E-01 |
| MVD        | -1.10 | 8.65E-01 | -1.62 | 9.48E-01 | -0.83 | 7.97E-01 |
| SDCBP      | -1.10 | 8.65E-01 | -0.57 | 7.15E-01 | -0.41 | 6.60E-01 |
| NUDT13     | -1.10 | 8.65E-01 | -0.65 | 7.41E-01 | -1.46 | 9.28E-01 |
| FAM171A2   | -1.11 | 8.65E-01 | -0.77 | 7.78E-01 | -0.33 | 6.28E-01 |
| PPOX       | -1.11 | 8.65E-01 | 0.84  | 2.02E-01 | 0.53  | 3.00E-01 |
| POLR1A     | -1.11 | 8.66E-01 | -0.12 | 5.48E-01 | 0.38  | 3.53E-01 |
| IFIT1B     | -1.11 | 8.66E-01 | -0.05 | 5.21E-01 | 1.00  | 1.59E-01 |
| LAMTOR3    | -1.11 | 8.66E-01 | -0.34 | 6.32E-01 | 0.74  | 2.31E-01 |
| MS4A12     | -1.11 | 8.66E-01 | -1.01 | 8.44E-01 | -0.05 | 5.22E-01 |
| MCM6       | -1.11 | 8.66E-01 | -1.39 | 9.18E-01 | -1.23 | 8.91E-01 |
| RASAL1     | -1.11 | 8.66E-01 | -0.45 | 6.74E-01 | -1.39 | 9.17E-01 |
| KMT2E      | -1.11 | 8.66E-01 | -0.66 | 7.47E-01 | -0.67 | 7.49E-01 |
| SCGB1A1    | -1.11 | 8.66E-01 | -1.35 | 9.11E-01 | -1.10 | 8.65E-01 |
| REV1       | -1.11 | 8.66E-01 | -0.16 | 5.62E-01 | -0.60 | 7.25E-01 |
| AC011294.3 | -1.11 | 8.66E-01 | -0.35 | 6.38E-01 | 1.91  | 2.80E-02 |
| OR1L8      | -1.11 | 8.66E-01 | 0.30  | 3.83E-01 | -0.45 | 6.73E-01 |
| ARHGAP19   | -1.11 | 8.66E-01 | 0.38  | 3.53E-01 | -0.57 | 7.17E-01 |

|               |       |          |       |          |       |          |
|---------------|-------|----------|-------|----------|-------|----------|
| KRT23         | -1.11 | 8.66E-01 | -1.01 | 8.44E-01 | -1.12 | 8.69E-01 |
| C1orf213      | -1.11 | 8.66E-01 | 1.40  | 8.13E-02 | 0.69  | 2.44E-01 |
| FAM216A       | -1.11 | 8.66E-01 | -0.84 | 8.00E-01 | -1.76 | 9.61E-01 |
| ASXL1         | -1.11 | 8.66E-01 | 1.99  | 2.34E-02 | 2.60  | 4.73E-03 |
| GAB2          | -1.11 | 8.67E-01 | -0.52 | 6.98E-01 | -0.51 | 6.96E-01 |
| NUMB          | -1.11 | 8.67E-01 | 0.70  | 2.43E-01 | 1.09  | 1.37E-01 |
| ADCK2         | -1.11 | 8.67E-01 | -0.62 | 7.34E-01 | 0.25  | 4.01E-01 |
| THAP7         | -1.11 | 8.67E-01 | -1.32 | 9.06E-01 | -0.92 | 8.20E-01 |
| R3HDM4        | -1.11 | 8.67E-01 | -0.14 | 5.56E-01 | -0.14 | 5.56E-01 |
| CCM2          | -1.11 | 8.67E-01 | 1.20  | 1.15E-01 | 0.27  | 3.92E-01 |
| PSMC4         | -1.11 | 8.67E-01 | -1.26 | 8.96E-01 | -0.43 | 6.67E-01 |
| FAM53A        | -1.11 | 8.67E-01 | -0.48 | 6.86E-01 | -0.94 | 8.26E-01 |
| ZNF469        | -1.11 | 8.67E-01 | -0.78 | 7.82E-01 | -1.89 | 9.70E-01 |
| RP11-286N22.8 | -1.11 | 8.67E-01 | -0.38 | 6.49E-01 | -0.75 | 7.74E-01 |
| B9D1          | -1.11 | 8.67E-01 | -0.77 | 7.80E-01 | -0.94 | 8.26E-01 |
| SP140L        | -1.11 | 8.67E-01 | -0.99 | 8.39E-01 | -0.27 | 6.06E-01 |
| THTPA         | -1.11 | 8.67E-01 | -1.01 | 8.43E-01 | -1.35 | 9.11E-01 |
| C4BPA         | -1.11 | 8.67E-01 | -0.23 | 5.91E-01 | -0.34 | 6.34E-01 |
| TRIM28        | -1.11 | 8.67E-01 | -2.15 | 9.84E-01 | -1.11 | 8.66E-01 |
| ZNF235        | -1.11 | 8.67E-01 | -1.13 | 8.71E-01 | -0.73 | 7.67E-01 |
| DNAJB14       | -1.11 | 8.67E-01 | -0.54 | 7.06E-01 | 0.91  | 1.82E-01 |
| MTX1          | -1.11 | 8.68E-01 | -1.74 | 9.59E-01 | -0.36 | 6.40E-01 |
| CYP27B1       | -1.12 | 8.68E-01 | -0.18 | 5.71E-01 | -0.65 | 7.41E-01 |
| TPST2         | -1.12 | 8.68E-01 | 0.09  | 4.63E-01 | -1.14 | 8.73E-01 |
| GNRH1         | -1.12 | 8.68E-01 | -0.43 | 6.65E-01 | -0.85 | 8.01E-01 |
| CHP2          | -1.12 | 8.68E-01 | -1.48 | 9.31E-01 | -0.19 | 5.76E-01 |
| USP8          | -1.12 | 8.68E-01 | -0.01 | 5.02E-01 | -1.48 | 9.31E-01 |
| SCRT2         | -1.12 | 8.68E-01 | -0.81 | 7.91E-01 | 0.16  | 4.38E-01 |
| PSPN          | -1.12 | 8.68E-01 | -1.01 | 8.43E-01 | -1.11 | 8.66E-01 |
| SPINK7        | -1.12 | 8.68E-01 | -1.49 | 9.32E-01 | -0.53 | 7.02E-01 |
| USP18         | -1.12 | 8.68E-01 | -0.23 | 5.92E-01 | -0.58 | 7.18E-01 |

|          |       |       |          |       |          |       |          |
|----------|-------|-------|----------|-------|----------|-------|----------|
| LRIG1    |       | -1.12 | 8.68E-01 | -0.99 | 8.39E-01 | -0.23 | 5.91E-01 |
| PZP      |       | -1.12 | 8.68E-01 | -1.60 | 9.45E-01 | -1.12 | 8.69E-01 |
| CSK      |       | -1.12 | 8.68E-01 | -1.56 | 9.41E-01 | 0.13  | 4.48E-01 |
| CCDC85B  |       | -1.12 | 8.68E-01 | -0.81 | 7.90E-01 | -0.22 | 5.86E-01 |
| ZPBP     |       | -1.12 | 8.68E-01 | -0.39 | 6.52E-01 | 0.34  | 3.67E-01 |
| UBE2QL1  |       | -1.12 | 8.68E-01 | -1.06 | 8.57E-01 | 0.68  | 2.47E-01 |
| PALD1    |       | -1.12 | 8.69E-01 | -1.07 | 8.58E-01 | -0.35 | 6.38E-01 |
| ZP3      |       | -1.12 | 8.69E-01 | -0.85 | 8.01E-01 | -1.66 | 9.52E-01 |
| SNX4     |       | -1.12 | 8.69E-01 | -0.46 | 6.77E-01 | -0.68 | 7.53E-01 |
| FGFBP3   |       | -1.12 | 8.69E-01 | 0.19  | 4.24E-01 | -0.60 | 7.26E-01 |
| ZBTB3    |       | -1.12 | 8.69E-01 | -0.50 | 6.92E-01 | -1.63 | 9.49E-01 |
| ZHX3     |       | -1.12 | 8.69E-01 | -0.31 | 6.21E-01 | -1.39 | 9.17E-01 |
|          | STX18 | -1.12 | 8.69E-01 | -1.53 | 9.36E-01 | -0.74 | 7.70E-01 |
| DLGAP1   |       | -1.12 | 8.69E-01 | -1.65 | 9.50E-01 | -1.40 | 9.19E-01 |
| RPS27    |       | -1.12 | 8.69E-01 | 0.25  | 4.02E-01 | 0.03  | 4.88E-01 |
| IQCE     |       | -1.12 | 8.69E-01 | 0.46  | 3.24E-01 | -0.73 | 7.67E-01 |
| TBX6     |       | -1.12 | 8.69E-01 | -1.20 | 8.85E-01 | -0.33 | 6.29E-01 |
| C11orf72 |       | -1.12 | 8.69E-01 | -0.61 | 7.30E-01 | 0.14  | 4.46E-01 |
| TFAP4    |       | -1.12 | 8.69E-01 | -0.62 | 7.33E-01 | -1.29 | 9.01E-01 |
| IL20     |       | -1.12 | 8.69E-01 | -1.29 | 9.01E-01 | 0.47  | 3.19E-01 |
| NUDC     |       | -1.12 | 8.69E-01 | -0.01 | 5.04E-01 | 1.92  | 2.75E-02 |
| NSMCE2   |       | -1.12 | 8.69E-01 | -0.48 | 6.83E-01 | 0.31  | 3.77E-01 |
| TNFSF8   |       | -1.12 | 8.69E-01 | -1.04 | 8.51E-01 | 0.08  | 4.69E-01 |
| DCLRE1C  |       | -1.12 | 8.70E-01 | -0.44 | 6.69E-01 | -0.95 | 8.28E-01 |
| SARDH    |       | -1.12 | 8.70E-01 | -0.31 | 6.21E-01 | 0.29  | 3.84E-01 |
| LURAP1   |       | -1.12 | 8.70E-01 | 0.06  | 4.74E-01 | 0.87  | 1.93E-01 |
| ULBP1    |       | -1.12 | 8.70E-01 | -0.53 | 7.04E-01 | -1.09 | 8.62E-01 |
| NHP2L1   |       | -1.13 | 8.70E-01 | -0.66 | 7.45E-01 | -1.65 | 9.50E-01 |
| SIX6     |       | -1.13 | 8.70E-01 | 0.43  | 3.33E-01 | -0.38 | 6.47E-01 |
| ERBB2    |       | -1.13 | 8.70E-01 | -0.16 | 5.64E-01 | -1.42 | 9.22E-01 |
| TFG      |       | -1.13 | 8.70E-01 | -0.52 | 6.98E-01 | 0.75  | 2.25E-01 |

|             |       |          |       |          |       |          |
|-------------|-------|----------|-------|----------|-------|----------|
| CLCC1       | -1.13 | 8.70E-01 | -0.39 | 6.50E-01 | -1.04 | 8.51E-01 |
| DENND2C     | -1.13 | 8.70E-01 | -1.84 | 9.67E-01 | -0.77 | 7.81E-01 |
| DDX39A      | -1.13 | 8.70E-01 | -0.56 | 7.12E-01 | -1.29 | 9.02E-01 |
| PREX1       | -1.13 | 8.70E-01 | -0.74 | 7.72E-01 | -0.63 | 7.36E-01 |
| ZDHHHC2     | -1.13 | 8.70E-01 | 0.36  | 3.61E-01 | -0.17 | 5.67E-01 |
| CYS1        | -1.13 | 8.70E-01 | -1.64 | 9.49E-01 | -0.94 | 8.27E-01 |
| LAMA4       | -1.13 | 8.70E-01 | -0.46 | 6.76E-01 | -0.70 | 7.57E-01 |
| GFRA3       | -1.13 | 8.70E-01 | -0.21 | 5.85E-01 | -0.70 | 7.59E-01 |
| PRRT3       | -1.13 | 8.70E-01 | -0.61 | 7.29E-01 | -0.28 | 6.09E-01 |
| FBXL4       | -1.13 | 8.70E-01 | 0.64  | 2.62E-01 | -0.31 | 6.21E-01 |
| FITM1       | -1.13 | 8.71E-01 | -0.35 | 6.37E-01 | -0.99 | 8.39E-01 |
| SELP        | -1.13 | 8.71E-01 | 0.82  | 2.06E-01 | -0.04 | 5.16E-01 |
| MOK         | -1.13 | 8.71E-01 | -0.44 | 6.70E-01 | -0.79 | 7.84E-01 |
| CLN8        | -1.13 | 8.71E-01 | -1.55 | 9.39E-01 | -0.98 | 8.37E-01 |
| UQCRB       | -1.13 | 8.71E-01 | -0.45 | 6.74E-01 | 0.36  | 3.59E-01 |
| JOSD1       | -1.13 | 8.71E-01 | 0.85  | 1.98E-01 | -1.01 | 8.44E-01 |
| ZNF529      | -1.13 | 8.71E-01 | 0.05  | 4.79E-01 | 0.38  | 3.52E-01 |
| ZNF189      | -1.13 | 8.71E-01 | -0.99 | 8.40E-01 | -0.50 | 6.93E-01 |
| MRGPRX2     | -1.13 | 8.71E-01 | -0.20 | 5.79E-01 | -0.54 | 7.05E-01 |
| BHLHA15     | -1.13 | 8.71E-01 | -0.72 | 7.63E-01 | -0.35 | 6.36E-01 |
| MARVELD1    | -1.13 | 8.71E-01 | 0.69  | 2.46E-01 | 0.38  | 3.53E-01 |
| KIAA1644    | -1.13 | 8.71E-01 | 0.20  | 4.23E-01 | -0.92 | 8.21E-01 |
| ZSWIM1      | -1.13 | 8.71E-01 | -0.93 | 8.23E-01 | -0.18 | 5.73E-01 |
| CBR4        | -1.13 | 8.71E-01 | -0.54 | 7.05E-01 | -0.57 | 7.16E-01 |
| SCYL2       | -1.13 | 8.72E-01 | -1.63 | 9.48E-01 | -0.79 | 7.86E-01 |
| TMEM87A     | -1.13 | 8.72E-01 | -0.64 | 7.38E-01 | -0.59 | 7.22E-01 |
| FXVD6-FXYD2 | -1.13 | 8.72E-01 | -1.09 | 8.62E-01 | -0.78 | 7.82E-01 |
| SHISA5      | -1.13 | 8.72E-01 | 0.46  | 3.22E-01 | -0.45 | 6.72E-01 |
| CACNG1      | -1.13 | 8.72E-01 | -0.65 | 7.43E-01 | -0.71 | 7.61E-01 |
| CPM         | -1.13 | 8.72E-01 | -1.29 | 9.01E-01 | -1.18 | 8.81E-01 |
| BEND6       | -1.13 | 8.72E-01 | -0.81 | 7.91E-01 | -0.42 | 6.63E-01 |

|             |       |          |       |          |       |          |
|-------------|-------|----------|-------|----------|-------|----------|
| PIGL        | -1.13 | 8.72E-01 | -1.61 | 9.47E-01 | -0.22 | 5.87E-01 |
| ADCY1       | -1.13 | 8.72E-01 | -1.94 | 9.74E-01 | -0.63 | 7.34E-01 |
| EIF4G2      | -1.13 | 8.72E-01 | -1.28 | 9.00E-01 | 0.02  | 4.91E-01 |
| INMT        | -1.14 | 8.72E-01 | 0.50  | 3.10E-01 | -0.47 | 6.80E-01 |
| ZNF638      | -1.14 | 8.72E-01 | -1.49 | 9.32E-01 | 0.41  | 3.41E-01 |
| KIN         | -1.14 | 8.72E-01 | -1.13 | 8.70E-01 | -0.22 | 5.87E-01 |
| SOCS2       | -1.14 | 8.72E-01 | -1.28 | 9.00E-01 | -0.26 | 6.04E-01 |
| TUBA1B      | -1.14 | 8.72E-01 | -1.43 | 9.24E-01 | -1.73 | 9.59E-01 |
| OR1L6       | -1.14 | 8.72E-01 | -1.52 | 9.36E-01 | -1.33 | 9.08E-01 |
| KRTAP19-6   | -1.14 | 8.72E-01 | -0.36 | 6.41E-01 | -1.54 | 9.38E-01 |
| TNFRSF19    | -1.14 | 8.72E-01 | -1.03 | 8.47E-01 | -0.63 | 7.37E-01 |
| MMP21       | -1.14 | 8.72E-01 | 0.08  | 4.67E-01 | -0.45 | 6.72E-01 |
| TLDC2       | -1.14 | 8.73E-01 | 0.04  | 4.85E-01 | 0.85  | 1.98E-01 |
| KRTAP11-1   | -1.14 | 8.73E-01 | -0.45 | 6.73E-01 | 0.88  | 1.89E-01 |
| PRDX6       | -1.14 | 8.73E-01 | 0.29  | 3.85E-01 | 0.41  | 3.42E-01 |
| ACVR2B      | -1.14 | 8.73E-01 | -0.31 | 6.22E-01 | -0.50 | 6.93E-01 |
| BIRC2       | -1.14 | 8.73E-01 | 0.75  | 2.25E-01 | 0.43  | 3.34E-01 |
| ZBTB16      | -1.14 | 8.73E-01 | -2.50 | 9.94E-01 | 0.60  | 2.74E-01 |
| APITD1      | -1.14 | 8.73E-01 | -0.39 | 6.53E-01 | 1.39  | 8.22E-02 |
| APITD1-CORT | -1.14 | 8.73E-01 | -0.39 | 6.53E-01 | 1.39  | 8.22E-02 |
| BCL6        | -1.14 | 8.73E-01 | -2.17 | 9.85E-01 | 0.12  | 4.51E-01 |
| ZNF365      | -1.14 | 8.73E-01 | -0.39 | 6.51E-01 | 0.29  | 3.85E-01 |
| CTXN3       | -1.14 | 8.73E-01 | 0.22  | 4.13E-01 | -0.55 | 7.08E-01 |
| SLC9A1      | -1.14 | 8.73E-01 | 0.42  | 3.38E-01 | 0.75  | 2.27E-01 |
| CYP4F12     | -1.14 | 8.73E-01 | -0.73 | 7.67E-01 | -0.02 | 5.06E-01 |
| PCIF1       | -1.14 | 8.73E-01 | -1.05 | 8.53E-01 | -1.39 | 9.17E-01 |
| NCBP1       | -1.14 | 8.73E-01 | -0.78 | 7.83E-01 | 0.44  | 3.30E-01 |
| C4orf6      | -1.14 | 8.73E-01 | -0.19 | 5.75E-01 | 0.71  | 2.40E-01 |
| NOA1        | -1.14 | 8.73E-01 | 1.01  | 1.57E-01 | -0.70 | 7.58E-01 |
| SEC14L3     | -1.14 | 8.73E-01 | -0.52 | 6.99E-01 | -1.55 | 9.40E-01 |
| SAP25       | -1.14 | 8.73E-01 | 0.68  | 2.47E-01 | 0.35  | 3.64E-01 |



|           |       |          |       |          |       |          |
|-----------|-------|----------|-------|----------|-------|----------|
| RFPL2     | -1.14 | 8.73E-01 | -1.04 | 8.51E-01 | 0.10  | 4.61E-01 |
| DSTN      | -1.14 | 8.73E-01 | -0.85 | 8.01E-01 | -0.39 | 6.52E-01 |
| MYO5C     | -1.14 | 8.73E-01 | -0.19 | 5.76E-01 | -0.72 | 7.64E-01 |
| SNX24     | -1.14 | 8.73E-01 | 0.37  | 3.55E-01 | -0.33 | 6.28E-01 |
| MYO7A     | -1.14 | 8.73E-01 | -0.93 | 8.24E-01 | -0.94 | 8.26E-01 |
| HBZ       | -1.14 | 8.73E-01 | 0.19  | 4.25E-01 | 0.26  | 3.97E-01 |
| ALDH2     | -1.14 | 8.73E-01 | -0.74 | 7.72E-01 | -0.95 | 8.28E-01 |
| PLA2G6    | -1.14 | 8.73E-01 | -0.70 | 7.58E-01 | -1.09 | 8.63E-01 |
| GZMK      | -1.14 | 8.74E-01 | 0.33  | 3.72E-01 | -0.72 | 7.66E-01 |
| RNASE3    | -1.14 | 8.74E-01 | -0.91 | 8.17E-01 | -1.23 | 8.90E-01 |
| SETBP1    | -1.14 | 8.74E-01 | 1.02  | 1.54E-01 | 0.96  | 1.68E-01 |
| ZNF319    | -1.14 | 8.74E-01 | -0.41 | 6.60E-01 | -0.50 | 6.93E-01 |
| SLC7A10   | -1.15 | 8.74E-01 | -0.10 | 5.41E-01 | -1.13 | 8.70E-01 |
| NASP      | -1.15 | 8.74E-01 | 0.22  | 4.13E-01 | 0.22  | 4.12E-01 |
| EPHA8     | -1.15 | 8.74E-01 | -0.87 | 8.07E-01 | -0.45 | 6.74E-01 |
| C17orf80  | -1.15 | 8.74E-01 | -0.87 | 8.09E-01 | -0.28 | 6.11E-01 |
| ME2       | -1.15 | 8.74E-01 | -1.13 | 8.71E-01 | -0.76 | 7.75E-01 |
| SP5       | -1.15 | 8.74E-01 | -0.20 | 5.77E-01 | 0.17  | 4.32E-01 |
| DLGAP3    | -1.15 | 8.74E-01 | -1.59 | 9.44E-01 | -0.98 | 8.36E-01 |
| CCDC51    | -1.15 | 8.74E-01 | 0.24  | 4.05E-01 | 0.39  | 3.49E-01 |
| CARS      | -1.15 | 8.74E-01 | 0.43  | 3.34E-01 | 0.07  | 4.71E-01 |
| OR2Y1     | -1.15 | 8.74E-01 | -1.15 | 8.76E-01 | -0.69 | 7.56E-01 |
| DERL3     | -1.15 | 8.74E-01 | -0.60 | 7.26E-01 | -0.54 | 7.06E-01 |
| IL22RA2   | -1.15 | 8.74E-01 | 0.56  | 2.89E-01 | -1.10 | 8.63E-01 |
| AFMID     | -1.15 | 8.75E-01 | 0.16  | 4.35E-01 | -0.80 | 7.89E-01 |
| TNR       | -1.15 | 8.75E-01 | 0.88  | 1.88E-01 | -1.65 | 9.51E-01 |
| GPR135    | -1.15 | 8.75E-01 | -1.91 | 9.72E-01 | -0.03 | 5.14E-01 |
| KRTAP19-3 | -1.15 | 8.75E-01 | -1.91 | 9.72E-01 | -0.17 | 5.68E-01 |
| ZDHHC21   | -1.15 | 8.75E-01 | -0.90 | 8.17E-01 | -0.63 | 7.36E-01 |
| KISS1     | -1.15 | 8.75E-01 | 0.32  | 3.75E-01 | 0.81  | 2.09E-01 |
| MAPK8IP2  | -1.15 | 8.75E-01 | -1.51 | 9.34E-01 | 0.80  | 2.13E-01 |

|               |       |          |       |          |       |          |
|---------------|-------|----------|-------|----------|-------|----------|
| TPBG          | -1.15 | 8.75E-01 | -0.85 | 8.04E-01 | -0.43 | 6.67E-01 |
| IFNA16        | -1.15 | 8.75E-01 | -1.53 | 9.37E-01 | -0.61 | 7.27E-01 |
| KNDC1         | -1.15 | 8.75E-01 | -1.59 | 9.44E-01 | -1.00 | 8.41E-01 |
| PNLDC1        | -1.15 | 8.75E-01 | 0.39  | 3.49E-01 | -0.84 | 8.01E-01 |
| DCST1         | -1.15 | 8.75E-01 | -1.29 | 9.01E-01 | -0.51 | 6.93E-01 |
| S100A14       | -1.15 | 8.75E-01 | -0.35 | 6.38E-01 | -1.04 | 8.50E-01 |
| SLC19A3       | -1.15 | 8.75E-01 | -1.32 | 9.06E-01 | -0.34 | 6.33E-01 |
| XKR7          | -1.15 | 8.75E-01 | 0.52  | 3.03E-01 | -0.40 | 6.56E-01 |
| CD53          | -1.15 | 8.75E-01 | -0.70 | 7.57E-01 | -0.28 | 6.10E-01 |
| CASP9         | -1.15 | 8.75E-01 | -0.57 | 7.16E-01 | -0.26 | 6.01E-01 |
| RFX4          | -1.15 | 8.75E-01 | -0.25 | 5.99E-01 | -0.03 | 5.14E-01 |
| SOX5          | -1.15 | 8.76E-01 | -0.41 | 6.60E-01 | 1.93  | 2.67E-02 |
| CCDC68        | -1.15 | 8.76E-01 | -1.31 | 9.05E-01 | -1.31 | 9.05E-01 |
| RP11-625H11.1 | -1.15 | 8.76E-01 | -0.06 | 5.23E-01 | 0.52  | 3.00E-01 |
| YAE1D1        | -1.15 | 8.76E-01 | -0.64 | 7.38E-01 | -1.09 | 8.62E-01 |
| HKDC1         | -1.15 | 8.76E-01 | -0.05 | 5.21E-01 | 0.01  | 4.95E-01 |
| S100B         | -1.15 | 8.76E-01 | -0.67 | 7.48E-01 | -1.95 | 9.74E-01 |
| FBXL22        | -1.15 | 8.76E-01 | -0.56 | 7.11E-01 | 0.63  | 2.65E-01 |
| AHNAK         | -1.15 | 8.76E-01 | 0.67  | 2.51E-01 | 0.84  | 2.01E-01 |
| GPALPP1       | -1.16 | 8.76E-01 | -0.09 | 5.36E-01 | -0.94 | 8.27E-01 |
| RHBDL1        | -1.16 | 8.76E-01 | -0.51 | 6.94E-01 | -0.08 | 5.33E-01 |
| CRADD         | -1.16 | 8.76E-01 | -0.94 | 8.26E-01 | -1.78 | 9.62E-01 |
| UFL1          | -1.16 | 8.76E-01 | -0.16 | 5.64E-01 | 0.38  | 3.51E-01 |
| RPGRIP1       | -1.16 | 8.76E-01 | 1.13  | 1.29E-01 | 0.38  | 3.51E-01 |
| WDR74         | -1.16 | 8.76E-01 | -1.04 | 8.50E-01 | -0.64 | 7.39E-01 |
| CTC-432M15.3  | -1.16 | 8.76E-01 | -0.44 | 6.69E-01 | -1.14 | 8.72E-01 |
| THUMPD1       | -1.16 | 8.76E-01 | -0.21 | 5.81E-01 | -0.05 | 5.19E-01 |
| CDKL2         | -1.16 | 8.76E-01 | 0.53  | 2.97E-01 | 0.92  | 1.78E-01 |
| ISL2          | -1.16 | 8.77E-01 | -0.43 | 6.66E-01 | -0.93 | 8.23E-01 |
| ABCC12        | -1.16 | 8.77E-01 | -0.97 | 8.33E-01 | 0.26  | 3.96E-01 |
| EPG5          | -1.16 | 8.77E-01 | -1.87 | 9.69E-01 | -1.56 | 9.41E-01 |

|            |       |          |       |          |       |          |
|------------|-------|----------|-------|----------|-------|----------|
| ABCB1      | -1.16 | 8.77E-01 | -0.40 | 6.55E-01 | -1.62 | 9.47E-01 |
| ADARB2     | -1.16 | 8.77E-01 | 0.52  | 3.01E-01 | -0.48 | 6.84E-01 |
| NOS1       | -1.16 | 8.77E-01 | -0.76 | 7.77E-01 | -1.43 | 9.23E-01 |
| DLX3       | -1.16 | 8.77E-01 | -0.83 | 7.98E-01 | -1.88 | 9.70E-01 |
| IMMP1L     | -1.16 | 8.77E-01 | -0.62 | 7.34E-01 | -0.65 | 7.43E-01 |
| JUND       | -1.16 | 8.77E-01 | -0.47 | 6.82E-01 | -0.06 | 5.26E-01 |
| TCF23      | -1.16 | 8.77E-01 | -0.86 | 8.04E-01 | -1.78 | 9.63E-01 |
| ANKRD30A   | -1.16 | 8.77E-01 | -0.01 | 5.06E-01 | 0.62  | 2.68E-01 |
| PFDN2      | -1.16 | 8.77E-01 | 0.73  | 2.33E-01 | 0.28  | 3.91E-01 |
| USP47      | -1.16 | 8.77E-01 | -0.06 | 5.23E-01 | -1.07 | 8.57E-01 |
| MAP1B      | -1.16 | 8.77E-01 | -1.24 | 8.93E-01 | -1.08 | 8.59E-01 |
| GIMAP2     | -1.16 | 8.77E-01 | -0.04 | 5.17E-01 | 0.67  | 2.51E-01 |
| AES        | -1.16 | 8.77E-01 | -2.41 | 9.92E-01 | -0.97 | 8.34E-01 |
| HIC2       | -1.16 | 8.78E-01 | -1.00 | 8.40E-01 | -1.43 | 9.24E-01 |
| C14orf132  | -1.16 | 8.78E-01 | -0.50 | 6.92E-01 | 0.90  | 1.85E-01 |
| SUMO1      | -1.16 | 8.78E-01 | -1.25 | 8.95E-01 | -1.95 | 9.74E-01 |
| CMSS1      | -1.16 | 8.78E-01 | -0.99 | 8.39E-01 | -0.26 | 6.02E-01 |
| RP11-6L6.2 | -1.16 | 8.78E-01 | -1.55 | 9.39E-01 | -0.68 | 7.53E-01 |
| TSPYL4     | -1.17 | 8.78E-01 | 0.65  | 2.58E-01 | -0.40 | 6.54E-01 |
| RCC1       | -1.17 | 8.78E-01 | -0.25 | 5.99E-01 | 0.30  | 3.82E-01 |
| DCTN6      | -1.17 | 8.78E-01 | -0.04 | 5.17E-01 | -0.88 | 8.10E-01 |
| SOHLH1     | -1.17 | 8.78E-01 | -0.28 | 6.10E-01 | -0.80 | 7.88E-01 |
| ERMP1      | -1.17 | 8.78E-01 | -0.28 | 6.11E-01 | -0.53 | 7.02E-01 |
| JUNB       | -1.17 | 8.78E-01 | -0.89 | 8.12E-01 | -1.75 | 9.60E-01 |
| OR10H4     | -1.17 | 8.79E-01 | -0.55 | 7.08E-01 | -0.08 | 5.32E-01 |
| ADAMTSL3   | -1.17 | 8.79E-01 | -0.87 | 8.09E-01 | 0.56  | 2.86E-01 |
| NRROS      | -1.17 | 8.79E-01 | -0.13 | 5.52E-01 | -0.87 | 8.07E-01 |
| PDGFRA     | -1.17 | 8.79E-01 | -0.64 | 7.39E-01 | -0.27 | 6.06E-01 |
| KIAA1377   | -1.17 | 8.79E-01 | 1.36  | 8.68E-02 | 0.25  | 4.00E-01 |
| TSTD2      | -1.17 | 8.79E-01 | -1.15 | 8.74E-01 | 0.04  | 4.85E-01 |
| CDC42EP2   | -1.17 | 8.79E-01 | 0.04  | 4.84E-01 | -0.07 | 5.27E-01 |

|          |       |          |       |          |       |          |
|----------|-------|----------|-------|----------|-------|----------|
| ROBO4    | -1.17 | 8.79E-01 | -0.39 | 6.51E-01 | -1.21 | 8.87E-01 |
| CXCL17   | -1.17 | 8.79E-01 | -0.29 | 6.16E-01 | -0.10 | 5.40E-01 |
| PSMA4    | -1.17 | 8.79E-01 | -0.41 | 6.58E-01 | 0.55  | 2.91E-01 |
| RPL13    | -1.17 | 8.79E-01 | -1.65 | 9.50E-01 | -1.20 | 8.84E-01 |
| FAM159A  | -1.17 | 8.79E-01 | -0.06 | 5.24E-01 | 0.27  | 3.93E-01 |
| KIF3C    | -1.17 | 8.79E-01 | -0.02 | 5.10E-01 | -1.09 | 8.63E-01 |
| GGA1     | -1.17 | 8.79E-01 | -0.05 | 5.22E-01 | -1.06 | 8.56E-01 |
| RANGRF   | -1.17 | 8.79E-01 | 0.00  | 5.01E-01 | -0.13 | 5.52E-01 |
| MASTL    | -1.17 | 8.79E-01 | -1.19 | 8.84E-01 | 0.40  | 3.44E-01 |
| MRPL51   | -1.17 | 8.79E-01 | 0.34  | 3.65E-01 | 0.55  | 2.91E-01 |
| TTLL3    | -1.17 | 8.79E-01 | -1.09 | 8.63E-01 | 0.66  | 2.53E-01 |
| SSFA2    | -1.17 | 8.79E-01 | -1.28 | 8.99E-01 | -0.95 | 8.29E-01 |
| SYF2     | -1.17 | 8.79E-01 | -2.58 | 9.95E-01 | -0.53 | 7.04E-01 |
| KIF27    | -1.17 | 8.79E-01 | -0.19 | 5.75E-01 | 1.03  | 1.51E-01 |
| LASP1    | -1.17 | 8.80E-01 | -1.59 | 9.44E-01 | -0.28 | 6.10E-01 |
| KANK4    | -1.17 | 8.80E-01 | -0.20 | 5.78E-01 | -0.97 | 8.35E-01 |
| NR1H2    | -1.17 | 8.80E-01 | -1.18 | 8.81E-01 | -0.94 | 8.26E-01 |
| TMEM165  | -1.17 | 8.80E-01 | -1.27 | 8.98E-01 | -0.42 | 6.61E-01 |
| FAM98B   | -1.17 | 8.80E-01 | -0.80 | 7.89E-01 | -1.44 | 9.25E-01 |
| PLCD1    | -1.17 | 8.80E-01 | -0.11 | 5.45E-01 | 1.32  | 9.35E-02 |
| HHIPL2   | -1.17 | 8.80E-01 | -1.00 | 8.40E-01 | -1.70 | 9.55E-01 |
| ZNF286A  | -1.18 | 8.80E-01 | -0.28 | 6.09E-01 | 0.36  | 3.60E-01 |
| RAB44    | -1.18 | 8.80E-01 | -0.55 | 7.08E-01 | -0.27 | 6.05E-01 |
| GP1BA    | -1.18 | 8.80E-01 | -0.21 | 5.82E-01 | -1.30 | 9.04E-01 |
| C12orf45 | -1.18 | 8.80E-01 | -1.63 | 9.48E-01 | -0.54 | 7.05E-01 |
| ATRNL    | -1.18 | 8.80E-01 | -0.37 | 6.46E-01 | -0.24 | 5.93E-01 |
| LRRC7    | -1.18 | 8.80E-01 | 1.29  | 9.77E-02 | -0.88 | 8.11E-01 |
| INTS8    | -1.18 | 8.80E-01 | -1.36 | 9.13E-01 | -1.77 | 9.62E-01 |
| NT5DC1   | -1.18 | 8.81E-01 | 0.66  | 2.55E-01 | -0.31 | 6.21E-01 |
| SLC16A6  | -1.18 | 8.81E-01 | -1.40 | 9.19E-01 | -0.43 | 6.65E-01 |
| GNAL     | -1.18 | 8.81E-01 | -1.30 | 9.04E-01 | 0.82  | 2.06E-01 |

|          |       |          |       |          |       |          |
|----------|-------|----------|-------|----------|-------|----------|
| ELAC2    | -1.18 | 8.81E-01 | -0.74 | 7.71E-01 | -0.35 | 6.37E-01 |
| CDCA8    | -1.18 | 8.81E-01 | -1.09 | 8.62E-01 | -0.83 | 7.96E-01 |
| SLC8A2   | -1.18 | 8.81E-01 | -1.21 | 8.88E-01 | -0.48 | 6.84E-01 |
| NDST3    | -1.18 | 8.81E-01 | -0.19 | 5.75E-01 | -0.69 | 7.54E-01 |
| POU5F2   | -1.18 | 8.81E-01 | -0.62 | 7.34E-01 | 0.25  | 4.02E-01 |
| PTPN9    | -1.18 | 8.81E-01 | -0.63 | 7.36E-01 | -1.91 | 9.72E-01 |
| PREX2    | -1.18 | 8.81E-01 | -1.19 | 8.82E-01 | -1.03 | 8.48E-01 |
| ZNF700   | -1.18 | 8.81E-01 | -0.83 | 7.96E-01 | -0.91 | 8.18E-01 |
| FAM46B   | -1.18 | 8.81E-01 | 0.38  | 3.51E-01 | 1.39  | 8.29E-02 |
| MAN1A2   | -1.18 | 8.81E-01 | -1.25 | 8.95E-01 | -0.17 | 5.69E-01 |
| VAMP8    | -1.18 | 8.81E-01 | 0.24  | 4.05E-01 | 0.45  | 3.27E-01 |
| ANKRD18A | -1.18 | 8.82E-01 | 0.01  | 4.96E-01 | -0.58 | 7.18E-01 |
| PPARGC1A | -1.18 | 8.82E-01 | -0.20 | 5.79E-01 | -0.68 | 7.53E-01 |
| HOMEZ    | -1.18 | 8.82E-01 | -0.40 | 6.57E-01 | -0.86 | 8.05E-01 |
| MPV17    | -1.18 | 8.82E-01 | -2.44 | 9.93E-01 | -0.04 | 5.17E-01 |
| REG3G    | -1.18 | 8.82E-01 | -1.91 | 9.72E-01 | -0.29 | 6.13E-01 |
| APOBEC3A | -1.18 | 8.82E-01 | -0.90 | 8.17E-01 | -0.43 | 6.68E-01 |
| LMBR1L   | -1.18 | 8.82E-01 | -0.80 | 7.88E-01 | -1.47 | 9.29E-01 |
| ZNF280A  | -1.18 | 8.82E-01 | -1.11 | 8.67E-01 | -1.44 | 9.25E-01 |
| IRF5     | -1.18 | 8.82E-01 | -1.91 | 9.72E-01 | 0.00  | 5.00E-01 |
| ACER3    | -1.19 | 8.82E-01 | 0.49  | 3.13E-01 | 0.68  | 2.48E-01 |
| CBX6     | -1.19 | 8.82E-01 | -0.66 | 7.44E-01 | -1.32 | 9.07E-01 |
| TOMM34   | -1.19 | 8.82E-01 | -0.36 | 6.40E-01 | 0.56  | 2.86E-01 |
| ZNF154   | -1.19 | 8.82E-01 | -0.11 | 5.46E-01 | -1.78 | 9.63E-01 |
| TBX18    | -1.19 | 8.82E-01 | 0.49  | 3.13E-01 | 0.78  | 2.18E-01 |
| PHACTR4  | -1.19 | 8.83E-01 | -0.79 | 7.84E-01 | -0.09 | 5.36E-01 |
| STK17B   | -1.19 | 8.83E-01 | -0.86 | 8.05E-01 | -0.69 | 7.56E-01 |
| TCTE3    | -1.19 | 8.83E-01 | -1.24 | 8.93E-01 | -0.47 | 6.82E-01 |
| CCDC122  | -1.19 | 8.83E-01 | 0.09  | 4.65E-01 | -0.16 | 5.64E-01 |
| SLC26A7  | -1.19 | 8.83E-01 | -0.30 | 6.17E-01 | -0.54 | 7.04E-01 |
| HNF1B    | -1.19 | 8.83E-01 | -0.43 | 6.65E-01 | -1.14 | 8.73E-01 |

|          |       |          |       |          |       |          |
|----------|-------|----------|-------|----------|-------|----------|
| FKBP9    | -1.19 | 8.83E-01 | -1.09 | 8.63E-01 | 0.30  | 3.82E-01 |
| IL17B    | -1.19 | 8.83E-01 | -0.52 | 6.98E-01 | 0.39  | 3.48E-01 |
| MB21D2   | -1.19 | 8.83E-01 | 0.23  | 4.09E-01 | 0.13  | 4.50E-01 |
| TMEM201  | -1.19 | 8.83E-01 | 0.06  | 4.74E-01 | -0.74 | 7.70E-01 |
| ECSCR    | -1.19 | 8.83E-01 | -0.40 | 6.55E-01 | 0.77  | 2.21E-01 |
| ZNF260   | -1.19 | 8.83E-01 | -0.88 | 8.11E-01 | -0.77 | 7.80E-01 |
| CCNC     | -1.19 | 8.84E-01 | 0.03  | 4.89E-01 | 0.00  | 5.00E-01 |
| OR2L3    | -1.19 | 8.84E-01 | -0.22 | 5.86E-01 | 0.53  | 2.97E-01 |
| PNLIPRP3 | -1.19 | 8.84E-01 | -0.60 | 7.27E-01 | 0.28  | 3.92E-01 |
| BFSP1    | -1.19 | 8.84E-01 | -1.13 | 8.71E-01 | -0.84 | 8.01E-01 |
| NGFR     | -1.19 | 8.84E-01 | -0.57 | 7.17E-01 | -1.35 | 9.11E-01 |
| LAPTM4A  | -1.19 | 8.84E-01 | -0.40 | 6.55E-01 | -0.64 | 7.39E-01 |
| SSH2     | -1.19 | 8.84E-01 | -1.02 | 8.47E-01 | -1.47 | 9.29E-01 |
| SDF2     | -1.20 | 8.84E-01 | -2.67 | 9.96E-01 | -0.54 | 7.06E-01 |
| HNRNPH3  | -1.20 | 8.84E-01 | -0.11 | 5.42E-01 | 0.38  | 3.51E-01 |
| TAS2R13  | -1.20 | 8.84E-01 | 0.05  | 4.80E-01 | 0.42  | 3.39E-01 |
| ADAT3    | -1.20 | 8.84E-01 | 0.40  | 3.43E-01 | -0.03 | 5.13E-01 |
| FAM120B  | -1.20 | 8.84E-01 | -0.81 | 7.90E-01 | -0.29 | 6.14E-01 |
| NEXN     | -1.20 | 8.84E-01 | -1.22 | 8.89E-01 | 1.01  | 1.56E-01 |
| PEX10    | -1.20 | 8.84E-01 | -1.36 | 9.12E-01 | -0.22 | 5.89E-01 |
| RUSC2    | -1.20 | 8.84E-01 | 0.64  | 2.60E-01 | -0.66 | 7.45E-01 |
| MYO1G    | -1.20 | 8.84E-01 | 0.60  | 2.76E-01 | -0.55 | 7.08E-01 |
| PHLDA1   | -1.20 | 8.85E-01 | -0.02 | 5.08E-01 | 0.04  | 4.86E-01 |
| RFPL4A   | -1.20 | 8.85E-01 | 0.23  | 4.08E-01 | 0.60  | 2.75E-01 |
| C2orf81  | -1.20 | 8.85E-01 | -0.74 | 7.70E-01 | -0.61 | 7.30E-01 |
| USP7     | -1.20 | 8.85E-01 | -1.68 | 9.53E-01 | 0.29  | 3.86E-01 |
| LRCH4    | -1.20 | 8.85E-01 | 0.38  | 3.51E-01 | 0.20  | 4.21E-01 |
| MST1R    | -1.20 | 8.85E-01 | 1.20  | 1.16E-01 | 0.94  | 1.74E-01 |
| GRP      | -1.20 | 8.85E-01 | -0.06 | 5.22E-01 | -0.58 | 7.20E-01 |
| RAB3GAP1 | -1.20 | 8.85E-01 | -0.76 | 7.75E-01 | -1.26 | 8.96E-01 |
| CCDC149  | -1.20 | 8.85E-01 | -0.31 | 6.21E-01 | 0.36  | 3.61E-01 |

|           |       |          |       |          |       |          |
|-----------|-------|----------|-------|----------|-------|----------|
| 43350     | -1.20 | 8.85E-01 | -0.68 | 7.50E-01 | -1.00 | 8.41E-01 |
| IL31RA    | -1.20 | 8.85E-01 | 1.47  | 7.08E-02 | 1.19  | 1.17E-01 |
| LPIN2     | -1.20 | 8.85E-01 | -1.27 | 8.98E-01 | -0.87 | 8.07E-01 |
| EXOC2     | -1.20 | 8.85E-01 | -0.01 | 5.04E-01 | -1.28 | 9.01E-01 |
| RIOK2     | -1.20 | 8.85E-01 | -0.99 | 8.40E-01 | 0.10  | 4.61E-01 |
| NLRP5     | -1.20 | 8.85E-01 | -2.17 | 9.85E-01 | -0.99 | 8.40E-01 |
| GIT1      | -1.20 | 8.85E-01 | 0.28  | 3.89E-01 | 0.13  | 4.50E-01 |
| MAP3K19   | -1.20 | 8.86E-01 | -1.35 | 9.11E-01 | -1.56 | 9.41E-01 |
| MYOM1     | -1.20 | 8.86E-01 | -0.59 | 7.22E-01 | -0.34 | 6.33E-01 |
| C9orf3    | -1.20 | 8.86E-01 | -0.09 | 5.37E-01 | -1.51 | 9.35E-01 |
| POLE      | -1.20 | 8.86E-01 | -1.41 | 9.20E-01 | -0.63 | 7.36E-01 |
| VTCN1     | -1.20 | 8.86E-01 | -0.62 | 7.33E-01 | -0.52 | 6.99E-01 |
| ZNF69     | -1.20 | 8.86E-01 | -0.32 | 6.27E-01 | -0.56 | 7.14E-01 |
| RNF19A    | -1.20 | 8.86E-01 | -0.65 | 7.43E-01 | -1.08 | 8.59E-01 |
| TXNDC9    | -1.21 | 8.86E-01 | -0.54 | 7.07E-01 | -0.45 | 6.73E-01 |
| RNF183    | -1.21 | 8.86E-01 | -0.60 | 7.24E-01 | 0.26  | 3.97E-01 |
| PSMC1     | -1.21 | 8.86E-01 | -0.66 | 7.46E-01 | -0.65 | 7.44E-01 |
| PAPD4     | -1.21 | 8.86E-01 | -1.02 | 8.47E-01 | -0.76 | 7.77E-01 |
| CEACAM16  | -1.21 | 8.86E-01 | 0.27  | 3.92E-01 | 0.85  | 1.98E-01 |
| KLHL38    | -1.21 | 8.86E-01 | 0.25  | 4.00E-01 | -0.15 | 5.58E-01 |
| MAP3K1    | -1.21 | 8.86E-01 | -0.44 | 6.70E-01 | -0.61 | 7.29E-01 |
| SH3PXD2B  | -1.21 | 8.86E-01 | -0.75 | 7.73E-01 | 0.72  | 2.37E-01 |
| SPEG      | -1.21 | 8.87E-01 | -0.44 | 6.70E-01 | 0.23  | 4.10E-01 |
| HIST1H2BM | -1.21 | 8.87E-01 | 0.35  | 3.61E-01 | 0.28  | 3.89E-01 |
| ELP4      | -1.21 | 8.87E-01 | -0.72 | 7.63E-01 | -0.43 | 6.67E-01 |
| CLINT1    | -1.21 | 8.87E-01 | 0.05  | 4.81E-01 | -0.91 | 8.19E-01 |
| NFU1      | -1.21 | 8.87E-01 | 0.61  | 2.70E-01 | 0.55  | 2.90E-01 |
| PTH       | -1.21 | 8.87E-01 | -0.72 | 7.63E-01 | 0.13  | 4.46E-01 |
| ATG12     | -1.21 | 8.87E-01 | -0.71 | 7.62E-01 | -0.61 | 7.28E-01 |
| CYP4F3    | -1.21 | 8.87E-01 | -0.81 | 7.90E-01 | -0.37 | 6.46E-01 |
| FAM96B    | -1.21 | 8.87E-01 | -0.93 | 8.25E-01 | -0.44 | 6.71E-01 |

|          |       |          |       |          |       |          |
|----------|-------|----------|-------|----------|-------|----------|
| GPR65    | -1.21 | 8.87E-01 | -1.39 | 9.18E-01 | -0.96 | 8.33E-01 |
| FAM126A  | -1.21 | 8.87E-01 | 0.04  | 4.85E-01 | -1.25 | 8.94E-01 |
| CDC42EP3 | -1.21 | 8.87E-01 | -0.83 | 7.96E-01 | 0.19  | 4.24E-01 |
| TBXA2R   | -1.21 | 8.87E-01 | -0.63 | 7.37E-01 | -2.44 | 9.93E-01 |
| C1orf127 | -1.21 | 8.87E-01 | 0.00  | 5.02E-01 | 0.56  | 2.88E-01 |
| PQLC1    | -1.21 | 8.87E-01 | -1.17 | 8.78E-01 | -1.76 | 9.61E-01 |
| GALNTL5  | -1.21 | 8.87E-01 | -0.36 | 6.41E-01 | -1.59 | 9.44E-01 |
| SESN2    | -1.21 | 8.87E-01 | -0.26 | 6.03E-01 | -0.34 | 6.32E-01 |
| TRMT11   | -1.21 | 8.88E-01 | -0.19 | 5.75E-01 | 0.04  | 4.84E-01 |
| FAT2     | -1.21 | 8.88E-01 | -0.17 | 5.69E-01 | 0.31  | 3.79E-01 |
| LALBA    | -1.21 | 8.88E-01 | -0.28 | 6.09E-01 | -1.03 | 8.48E-01 |
| MED29    | -1.21 | 8.88E-01 | 0.76  | 2.23E-01 | 2.01  | 2.23E-02 |
| SLMAP    | -1.21 | 8.88E-01 | -0.03 | 5.10E-01 | 0.19  | 4.25E-01 |
| ABR      | -1.22 | 8.88E-01 | -0.59 | 7.21E-01 | -0.52 | 6.98E-01 |
| ALKBH7   | -1.22 | 8.88E-01 | -0.90 | 8.16E-01 | -1.15 | 8.76E-01 |
| GGA3     | -1.22 | 8.88E-01 | -0.13 | 5.51E-01 | -1.12 | 8.69E-01 |
| PRKACB   | -1.22 | 8.88E-01 | -1.03 | 8.48E-01 | -0.31 | 6.23E-01 |
| ABCG8    | -1.22 | 8.88E-01 | -0.19 | 5.75E-01 | -0.60 | 7.25E-01 |
| HES7     | -1.22 | 8.88E-01 | 0.52  | 3.01E-01 | 1.87  | 3.08E-02 |
| PPTC7    | -1.22 | 8.88E-01 | -2.30 | 9.89E-01 | -1.69 | 9.54E-01 |
| SELV     | -1.22 | 8.88E-01 | -0.90 | 8.15E-01 | 0.24  | 4.04E-01 |
| ZNF331   | -1.22 | 8.88E-01 | -0.61 | 7.30E-01 | -0.35 | 6.38E-01 |
| PRR14L   | -1.22 | 8.89E-01 | -0.59 | 7.22E-01 | -0.41 | 6.58E-01 |
| C5orf47  | -1.22 | 8.89E-01 | -0.33 | 6.29E-01 | 0.03  | 4.86E-01 |
| CLUL1    | -1.22 | 8.89E-01 | -0.30 | 6.19E-01 | -1.45 | 9.26E-01 |
| TBATA    | -1.22 | 8.89E-01 | -0.72 | 7.64E-01 | -0.49 | 6.86E-01 |
| BAD      | -1.22 | 8.89E-01 | 0.20  | 4.20E-01 | -0.14 | 5.56E-01 |
| CYP26C1  | -1.22 | 8.89E-01 | -0.14 | 5.56E-01 | -0.67 | 7.48E-01 |
| DDB1     | -1.22 | 8.89E-01 | -0.86 | 8.04E-01 | -1.07 | 8.57E-01 |
| ITGB3    | -1.22 | 8.89E-01 | 0.92  | 1.79E-01 | 1.22  | 1.12E-01 |
| ITGB3    | -1.22 | 8.89E-01 | 0.92  | 1.79E-01 | 1.22  | 1.12E-01 |



|          |       |          |       |          |       |          |
|----------|-------|----------|-------|----------|-------|----------|
| PAWR     | -1.22 | 8.89E-01 | -1.10 | 8.64E-01 | -0.89 | 8.12E-01 |
| SPAG1    | -1.22 | 8.89E-01 | -1.78 | 9.63E-01 | -0.54 | 7.06E-01 |
| VENTX    | -1.22 | 8.89E-01 | -0.47 | 6.83E-01 | 0.44  | 3.31E-01 |
| NPRL3    | -1.22 | 8.90E-01 | 0.23  | 4.08E-01 | 0.64  | 2.60E-01 |
| EPRS     | -1.22 | 8.90E-01 | -1.04 | 8.51E-01 | -0.36 | 6.41E-01 |
| NRDE2    | -1.23 | 8.90E-01 | -2.13 | 9.83E-01 | -1.02 | 8.47E-01 |
| PPFIA3   | -1.23 | 8.90E-01 | -0.35 | 6.37E-01 | -0.20 | 5.81E-01 |
| UBR4     | -1.23 | 8.90E-01 | -0.21 | 5.83E-01 | -1.23 | 8.90E-01 |
| LARGE    | -1.23 | 8.90E-01 | 0.48  | 3.14E-01 | -0.48 | 6.83E-01 |
| RGS6     | -1.23 | 8.90E-01 | -1.13 | 8.71E-01 | 0.45  | 3.26E-01 |
| COX5A    | -1.23 | 8.90E-01 | -0.51 | 6.97E-01 | 0.33  | 3.70E-01 |
| SMAD7    | -1.23 | 8.90E-01 | -1.19 | 8.83E-01 | 0.15  | 4.40E-01 |
| CELA3A   | -1.23 | 8.90E-01 | -0.55 | 7.10E-01 | 0.48  | 3.15E-01 |
| NTF4     | -1.23 | 8.90E-01 | 0.87  | 1.92E-01 | 0.60  | 2.75E-01 |
| IFIT3    | -1.23 | 8.90E-01 | -0.38 | 6.48E-01 | 0.02  | 4.94E-01 |
| RFPL4AL1 | -1.23 | 8.90E-01 | 0.51  | 3.05E-01 | 0.22  | 4.13E-01 |
| P2RX2    | -1.23 | 8.90E-01 | -0.74 | 7.69E-01 | -0.13 | 5.51E-01 |
| KANK2    | -1.23 | 8.90E-01 | -0.62 | 7.33E-01 | -0.81 | 7.92E-01 |
| KRTAP9-1 | -1.23 | 8.91E-01 | -1.20 | 8.86E-01 | -1.73 | 9.58E-01 |
| HOXB5    | -1.23 | 8.91E-01 | 0.49  | 3.11E-01 | -0.53 | 7.01E-01 |
| EZR      | -1.23 | 8.91E-01 | 0.52  | 3.00E-01 | -0.57 | 7.15E-01 |
| CDCA3    | -1.23 | 8.91E-01 | -0.21 | 5.82E-01 | 0.63  | 2.63E-01 |
| C19orf68 | -1.23 | 8.91E-01 | -1.05 | 8.52E-01 | -1.95 | 9.74E-01 |
| ANP32B   | -1.23 | 8.91E-01 | 0.17  | 4.33E-01 | -0.58 | 7.19E-01 |
| MYT1     | -1.23 | 8.91E-01 | 0.08  | 4.66E-01 | -0.02 | 5.08E-01 |
| POP1     | -1.23 | 8.91E-01 | -1.50 | 9.34E-01 | -0.58 | 7.21E-01 |
| ZFP62    | -1.23 | 8.91E-01 | -0.33 | 6.28E-01 | 0.03  | 4.89E-01 |
| TMEM150A | -1.23 | 8.91E-01 | -0.11 | 5.45E-01 | 0.06  | 4.78E-01 |
| DAP3     | -1.23 | 8.91E-01 | 0.05  | 4.80E-01 | -0.01 | 5.05E-01 |
| CRBN     | -1.23 | 8.91E-01 | -0.71 | 7.62E-01 | -0.51 | 6.96E-01 |
| TTBK2    | -1.23 | 8.91E-01 | -0.92 | 8.20E-01 | -1.02 | 8.45E-01 |

|           |       |          |       |          |       |          |
|-----------|-------|----------|-------|----------|-------|----------|
| ORMDL3    | -1.23 | 8.91E-01 | -1.32 | 9.07E-01 | -1.33 | 9.08E-01 |
| ACAT2     | -1.23 | 8.91E-01 | 0.29  | 3.85E-01 | -0.42 | 6.64E-01 |
| SHANK2    | -1.23 | 8.91E-01 | 0.33  | 3.69E-01 | -0.81 | 7.90E-01 |
| USP13     | -1.23 | 8.91E-01 | -0.98 | 8.37E-01 | 1.05  | 1.46E-01 |
| NR3C1     | -1.23 | 8.91E-01 | -0.10 | 5.39E-01 | -0.22 | 5.88E-01 |
| GDA       | -1.23 | 8.91E-01 | -0.27 | 6.08E-01 | -1.26 | 8.96E-01 |
| EXOSC3    | -1.23 | 8.92E-01 | -1.09 | 8.63E-01 | -0.60 | 7.27E-01 |
| MSRB1     | -1.23 | 8.92E-01 | -1.44 | 9.25E-01 | -1.16 | 8.78E-01 |
| ST3GAL4   | -1.24 | 8.92E-01 | -0.25 | 5.98E-01 | -1.92 | 9.73E-01 |
| TNFRSF11A | -1.24 | 8.92E-01 | 0.31  | 3.77E-01 | -0.31 | 6.20E-01 |
| TTLL12    | -1.24 | 8.92E-01 | 0.15  | 4.40E-01 | 0.31  | 3.80E-01 |
| CHCHD5    | -1.24 | 8.92E-01 | -1.08 | 8.60E-01 | -1.13 | 8.71E-01 |
| IL4R      | -1.24 | 8.92E-01 | -1.53 | 9.37E-01 | -0.78 | 7.81E-01 |
| TMEM233   | -1.24 | 8.92E-01 | -0.36 | 6.42E-01 | 0.71  | 2.39E-01 |
| AMBP      | -1.24 | 8.92E-01 | -0.62 | 7.32E-01 | -1.15 | 8.74E-01 |
| SAR1B     | -1.24 | 8.92E-01 | -2.00 | 9.77E-01 | 0.56  | 2.89E-01 |
| PCP4L1    | -1.24 | 8.92E-01 | -0.62 | 7.33E-01 | 0.71  | 2.39E-01 |
| ZNF708    | -1.24 | 8.92E-01 | -0.22 | 5.87E-01 | -1.37 | 9.14E-01 |
| HSF2BP    | -1.24 | 8.92E-01 | -0.69 | 7.55E-01 | -0.55 | 7.10E-01 |
| ACTN2     | -1.24 | 8.92E-01 | 1.08  | 1.39E-01 | 0.74  | 2.30E-01 |
| BPIFB1    | -1.24 | 8.92E-01 | 0.12  | 4.51E-01 | -0.51 | 6.94E-01 |
| C1orf43   | -1.24 | 8.92E-01 | -0.85 | 8.03E-01 | -1.71 | 9.56E-01 |
| NUTM2F    | -1.24 | 8.92E-01 | -0.46 | 6.78E-01 | -0.53 | 7.00E-01 |
| RSRC2     | -1.24 | 8.92E-01 | -0.95 | 8.29E-01 | -0.52 | 6.98E-01 |
| TMEM241   | -1.24 | 8.92E-01 | -1.65 | 9.51E-01 | 0.13  | 4.50E-01 |
| SMIM21    | -1.24 | 8.92E-01 | 0.36  | 3.58E-01 | 0.03  | 4.86E-01 |
| TMEM72    | -1.24 | 8.92E-01 | -1.46 | 9.28E-01 | -0.77 | 7.78E-01 |
| RAB3C     | -1.24 | 8.92E-01 | -0.96 | 8.31E-01 | -0.75 | 7.73E-01 |
| RAD54B    | -1.24 | 8.93E-01 | 0.02  | 4.92E-01 | -0.85 | 8.03E-01 |
| DTX2      | -1.24 | 8.93E-01 | -0.70 | 7.58E-01 | -0.87 | 8.07E-01 |
| FAM104A   | -1.24 | 8.93E-01 | -1.04 | 8.51E-01 | -0.31 | 6.20E-01 |

|          |       |          |       |          |       |          |
|----------|-------|----------|-------|----------|-------|----------|
| BLVRA    | -1.24 | 8.93E-01 | -0.19 | 5.75E-01 | -1.10 | 8.64E-01 |
| C6orf58  | -1.24 | 8.93E-01 | -0.26 | 6.02E-01 | -0.32 | 6.25E-01 |
| DDX27    | -1.24 | 8.93E-01 | -0.83 | 7.96E-01 | -0.94 | 8.27E-01 |
| RPS24    | -1.24 | 8.93E-01 | -0.73 | 7.67E-01 | -1.73 | 9.58E-01 |
| TRNAU1AP | -1.24 | 8.93E-01 | -0.25 | 5.97E-01 | 0.55  | 2.91E-01 |
| MLLT6    | -1.24 | 8.93E-01 | -1.14 | 8.72E-01 | -0.57 | 7.16E-01 |
| RAPGEF6  | -1.24 | 8.93E-01 | -0.49 | 6.88E-01 | -1.16 | 8.77E-01 |
| TRIAP1   | -1.24 | 8.93E-01 | -0.50 | 6.90E-01 | -0.07 | 5.28E-01 |
| BRE      | -1.24 | 8.93E-01 | -1.43 | 9.24E-01 | 0.28  | 3.89E-01 |
| ZNF648   | -1.25 | 8.93E-01 | -0.77 | 7.78E-01 | -0.25 | 5.97E-01 |
| SMARCB1  | -1.25 | 8.94E-01 | -0.19 | 5.74E-01 | -0.78 | 7.82E-01 |
| GPR157   | -1.25 | 8.94E-01 | 0.83  | 2.03E-01 | 0.30  | 3.83E-01 |
| CD160    | -1.25 | 8.94E-01 | -0.72 | 7.63E-01 | -1.61 | 9.47E-01 |
| CEP95    | -1.25 | 8.94E-01 | 1.13  | 1.30E-01 | 0.59  | 2.79E-01 |
| ACAA1    | -1.25 | 8.94E-01 | -1.27 | 8.99E-01 | -0.60 | 7.27E-01 |
| MMP13    | -1.25 | 8.94E-01 | 0.12  | 4.53E-01 | 0.48  | 3.17E-01 |
| ALDH8A1  | -1.25 | 8.94E-01 | -1.47 | 9.29E-01 | -0.74 | 7.71E-01 |
| MAS1     | -1.25 | 8.94E-01 | -0.11 | 5.44E-01 | 0.11  | 4.55E-01 |
| PHOSPHO1 | -1.25 | 8.94E-01 | -1.58 | 9.43E-01 | 0.42  | 3.36E-01 |
| CCDC3    | -1.25 | 8.94E-01 | 0.43  | 3.35E-01 | -1.28 | 9.00E-01 |
| IFI44L   | -1.25 | 8.95E-01 | -0.71 | 7.60E-01 | -1.82 | 9.65E-01 |
| MON2     | -1.25 | 8.95E-01 | 0.52  | 3.02E-01 | -0.80 | 7.88E-01 |
| SLC8A3   | -1.25 | 8.95E-01 | -1.20 | 8.84E-01 | -1.65 | 9.51E-01 |
| HTN3     | -1.25 | 8.95E-01 | -0.08 | 5.34E-01 | -0.79 | 7.86E-01 |
| FAM179A  | -1.25 | 8.95E-01 | 0.36  | 3.61E-01 | -1.17 | 8.79E-01 |
| MET      | -1.25 | 8.95E-01 | -0.27 | 6.07E-01 | -1.17 | 8.80E-01 |
| ZNF169   | -1.25 | 8.95E-01 | -0.62 | 7.31E-01 | -0.19 | 5.74E-01 |
| CROCC    | -1.25 | 8.95E-01 | -1.45 | 9.27E-01 | -0.43 | 6.67E-01 |
| NRAS     | -1.25 | 8.95E-01 | -0.68 | 7.53E-01 | -1.03 | 8.49E-01 |
| RAPGEF2  | -1.26 | 8.95E-01 | 0.30  | 3.81E-01 | -0.42 | 6.63E-01 |
| SCG2     | -1.26 | 8.95E-01 | -0.60 | 7.27E-01 | -0.97 | 8.33E-01 |

|            |       |          |       |          |       |          |
|------------|-------|----------|-------|----------|-------|----------|
| LYRM4      | -1.26 | 8.95E-01 | 0.12  | 4.54E-01 | -1.42 | 9.23E-01 |
| LTB4R      | -1.26 | 8.95E-01 | -0.98 | 8.36E-01 | -1.47 | 9.30E-01 |
| CORO2A     | -1.26 | 8.95E-01 | -1.16 | 8.76E-01 | -1.08 | 8.60E-01 |
| TTC30A     | -1.26 | 8.95E-01 | -0.33 | 6.30E-01 | 0.47  | 3.18E-01 |
| ZNF763     | -1.26 | 8.95E-01 | -1.04 | 8.51E-01 | -1.15 | 8.76E-01 |
| CSDE1      | -1.26 | 8.96E-01 | -1.24 | 8.92E-01 | -0.15 | 5.60E-01 |
| TYMS       | -1.26 | 8.96E-01 | -0.75 | 7.74E-01 | -0.61 | 7.30E-01 |
| CORO6      | -1.26 | 8.96E-01 | -0.47 | 6.82E-01 | -1.38 | 9.16E-01 |
| PLOD3      | -1.26 | 8.96E-01 | -0.28 | 6.10E-01 | -0.94 | 8.26E-01 |
| CBR3       | -1.26 | 8.96E-01 | -0.22 | 5.88E-01 | -1.12 | 8.68E-01 |
| ZNF763     | -1.26 | 8.96E-01 | -1.05 | 8.54E-01 | -1.17 | 8.78E-01 |
| EPB42      | -1.26 | 8.96E-01 | -0.21 | 5.83E-01 | -1.12 | 8.68E-01 |
| KRT86      | -1.26 | 8.96E-01 | -0.67 | 7.50E-01 | -0.77 | 7.80E-01 |
| TXNL4A     | -1.26 | 8.96E-01 | -1.08 | 8.59E-01 | -0.44 | 6.69E-01 |
| NOL4       | -1.26 | 8.96E-01 | 0.25  | 4.01E-01 | -1.46 | 9.27E-01 |
| BCL2L2     | -1.26 | 8.96E-01 | -0.52 | 6.97E-01 | -0.14 | 5.54E-01 |
| ABHD17B    | -1.26 | 8.96E-01 | -1.05 | 8.52E-01 | -0.47 | 6.81E-01 |
| SH3GLB2    | -1.26 | 8.96E-01 | -1.58 | 9.43E-01 | -0.41 | 6.59E-01 |
| HHLA1      | -1.26 | 8.96E-01 | -1.57 | 9.42E-01 | -1.74 | 9.59E-01 |
| LAMA1      | -1.26 | 8.96E-01 | -1.09 | 8.61E-01 | -1.42 | 9.22E-01 |
| AC004381.6 | -1.26 | 8.96E-01 | -0.30 | 6.18E-01 | -0.23 | 5.91E-01 |
| GNRHR      | -1.26 | 8.96E-01 | -1.18 | 8.81E-01 | -1.05 | 8.52E-01 |
| FAM194A    | -1.26 | 8.96E-01 | -0.20 | 5.80E-01 | -0.40 | 6.54E-01 |
| PRKCB      | -1.26 | 8.96E-01 | -0.82 | 7.93E-01 | -0.28 | 6.12E-01 |
| ADAM33     | -1.26 | 8.97E-01 | -0.13 | 5.53E-01 | -0.94 | 8.27E-01 |
| OAS3       | -1.26 | 8.97E-01 | -0.79 | 7.86E-01 | -0.90 | 8.16E-01 |
| VN1R4      | -1.26 | 8.97E-01 | -1.07 | 8.58E-01 | -0.85 | 8.03E-01 |
| JAKMIP3    | -1.26 | 8.97E-01 | -0.07 | 5.28E-01 | 2.11  | 1.76E-02 |
| DENND5B    | -1.26 | 8.97E-01 | -1.41 | 9.21E-01 | -1.23 | 8.90E-01 |
| OLFM4      | -1.26 | 8.97E-01 | -1.38 | 9.17E-01 | -1.32 | 9.06E-01 |
| COX10      | -1.26 | 8.97E-01 | -0.82 | 7.93E-01 | -0.87 | 8.07E-01 |

|          |       |          |       |          |       |          |
|----------|-------|----------|-------|----------|-------|----------|
| GALP     | -1.26 | 8.97E-01 | 0.19  | 4.26E-01 | -0.71 | 7.61E-01 |
| C12orf76 | -1.27 | 8.97E-01 | -1.45 | 9.26E-01 | -0.99 | 8.39E-01 |
| TRPV3    | -1.27 | 8.97E-01 | -1.46 | 9.28E-01 | -0.24 | 5.95E-01 |
| KIF1C    | -1.27 | 8.97E-01 | -0.85 | 8.02E-01 | -0.17 | 5.66E-01 |
| DDX46    | -1.27 | 8.97E-01 | -1.38 | 9.17E-01 | 0.22  | 4.12E-01 |
| NEUROD4  | -1.27 | 8.97E-01 | -1.25 | 8.94E-01 | -1.20 | 8.85E-01 |
| LRP12    | -1.27 | 8.97E-01 | 0.51  | 3.05E-01 | -0.76 | 7.78E-01 |
| MED25    | -1.27 | 8.98E-01 | -0.38 | 6.47E-01 | -0.32 | 6.26E-01 |
| KIAA1045 | -1.27 | 8.98E-01 | -0.75 | 7.74E-01 | 0.27  | 3.94E-01 |
| DDX51    | -1.27 | 8.98E-01 | -1.68 | 9.53E-01 | 0.02  | 4.91E-01 |
| HES6     | -1.27 | 8.98E-01 | -0.92 | 8.21E-01 | 0.30  | 3.84E-01 |
| VIM      | -1.27 | 8.98E-01 | -0.52 | 7.00E-01 | -1.53 | 9.38E-01 |
| CDHR1    | -1.27 | 8.98E-01 | -0.22 | 5.87E-01 | 0.28  | 3.89E-01 |
| PPP2R5C  | -1.27 | 8.98E-01 | -0.87 | 8.09E-01 | 1.01  | 1.56E-01 |
| AKAP10   | -1.27 | 8.98E-01 | -0.42 | 6.61E-01 | -0.51 | 6.96E-01 |
| NPEPL1   | -1.27 | 8.98E-01 | -0.09 | 5.38E-01 | 0.29  | 3.85E-01 |
| FAM218A  | -1.27 | 8.98E-01 | -0.01 | 5.04E-01 | -0.34 | 6.32E-01 |
| 43354    | -1.27 | 8.98E-01 | -1.17 | 8.78E-01 | -1.10 | 8.64E-01 |
| NUDCD3   | -1.27 | 8.98E-01 | 0.51  | 3.06E-01 | 0.81  | 2.10E-01 |
| NOX5     | -1.27 | 8.98E-01 | 0.25  | 4.01E-01 | -0.16 | 5.63E-01 |
| STK35    | -1.27 | 8.98E-01 | -0.96 | 8.32E-01 | 0.16  | 4.37E-01 |
| INO80C   | -1.27 | 8.98E-01 | -0.47 | 6.80E-01 | -1.04 | 8.52E-01 |
| PRSS1    | -1.27 | 8.98E-01 | -0.66 | 7.46E-01 | -0.54 | 7.05E-01 |
| APOE     | -1.27 | 8.98E-01 | -0.37 | 6.44E-01 | -0.40 | 6.56E-01 |
| POLQ     | -1.27 | 8.98E-01 | -0.51 | 6.94E-01 | -0.34 | 6.32E-01 |
| SCAMP2   | -1.27 | 8.99E-01 | -0.97 | 8.35E-01 | 0.01  | 4.96E-01 |
| EIF3E    | -1.27 | 8.99E-01 | -0.57 | 7.16E-01 | -1.87 | 9.69E-01 |
| ATHL1    | -1.27 | 8.99E-01 | -1.28 | 9.00E-01 | -2.03 | 9.79E-01 |
| EP400NL  | -1.27 | 8.99E-01 | -1.38 | 9.17E-01 | 0.01  | 4.96E-01 |
| FAM188B  | -1.27 | 8.99E-01 | 0.56  | 2.89E-01 | 0.13  | 4.50E-01 |
| CENPC    | -1.27 | 8.99E-01 | -1.74 | 9.59E-01 | -0.36 | 6.41E-01 |

|               |       |          |       |          |       |          |
|---------------|-------|----------|-------|----------|-------|----------|
| SEPP1         | -1.28 | 8.99E-01 | -1.65 | 9.51E-01 | -0.37 | 6.44E-01 |
| PPP4R1        | -1.28 | 8.99E-01 | -1.00 | 8.41E-01 | -0.99 | 8.39E-01 |
| COL4A4        | -1.28 | 8.99E-01 | -0.61 | 7.31E-01 | 0.19  | 4.27E-01 |
| CDKN1B        | -1.28 | 8.99E-01 | 0.68  | 2.50E-01 | -0.28 | 6.09E-01 |
| PPP1R3C       | -1.28 | 8.99E-01 | -1.35 | 9.11E-01 | 0.01  | 4.97E-01 |
| BSPRY         | -1.28 | 8.99E-01 | -0.88 | 8.11E-01 | -0.71 | 7.60E-01 |
| MSS51         | -1.28 | 8.99E-01 | -0.51 | 6.96E-01 | -1.35 | 9.12E-01 |
| NSMAF         | -1.28 | 8.99E-01 | -1.06 | 8.56E-01 | 0.45  | 3.25E-01 |
| STRIP1        | -1.28 | 8.99E-01 | 0.57  | 2.86E-01 | 0.52  | 3.01E-01 |
| EIF2A         | -1.28 | 9.00E-01 | 0.19  | 4.24E-01 | -0.58 | 7.19E-01 |
| LPP           | -1.28 | 9.00E-01 | -1.95 | 9.74E-01 | 0.23  | 4.08E-01 |
| GAN           | -1.28 | 9.00E-01 | -1.45 | 9.27E-01 | -1.29 | 9.02E-01 |
| ZBTB49        | -1.28 | 9.00E-01 | -0.66 | 7.45E-01 | -0.79 | 7.85E-01 |
| RP11-766F14.2 | -1.28 | 9.00E-01 | -0.25 | 5.97E-01 | 0.25  | 4.02E-01 |
| ATP5I         | -1.28 | 9.00E-01 | -0.29 | 6.14E-01 | -0.76 | 7.76E-01 |
| GCKR          | -1.28 | 9.00E-01 | 0.45  | 3.27E-01 | 1.11  | 1.34E-01 |
| RBM8A         | -1.28 | 9.00E-01 | 0.55  | 2.91E-01 | 0.19  | 4.23E-01 |
| FTCD          | -1.28 | 9.00E-01 | -0.73 | 7.69E-01 | 0.24  | 4.05E-01 |
| HS3ST3B1      | -1.28 | 9.00E-01 | -1.65 | 9.51E-01 | -1.01 | 8.44E-01 |
| BPI           | -1.28 | 9.00E-01 | 0.95  | 1.71E-01 | -0.17 | 5.66E-01 |
| CSNK1G1       | -1.28 | 9.00E-01 | -0.67 | 7.50E-01 | -1.25 | 8.94E-01 |
| BTBD2         | -1.28 | 9.00E-01 | 0.00  | 5.00E-01 | -0.14 | 5.56E-01 |
| RPL9          | -1.28 | 9.00E-01 | -1.33 | 9.09E-01 | -1.30 | 9.03E-01 |
| MYL7          | -1.28 | 9.00E-01 | -0.39 | 6.51E-01 | -0.79 | 7.85E-01 |
| TRIM67        | -1.28 | 9.00E-01 | -0.86 | 8.06E-01 | -1.46 | 9.28E-01 |
| PHLDB2        | -1.28 | 9.01E-01 | 0.22  | 4.13E-01 | 0.60  | 2.73E-01 |
| SULT1C2       | -1.29 | 9.01E-01 | -0.82 | 7.93E-01 | -1.49 | 9.31E-01 |
| PLEKHG3       | -1.29 | 9.01E-01 | -0.39 | 6.51E-01 | -1.23 | 8.90E-01 |
| ARGFX         | -1.29 | 9.01E-01 | -1.22 | 8.89E-01 | -0.94 | 8.26E-01 |
| KIAA0101      | -1.29 | 9.01E-01 | -0.50 | 6.91E-01 | -1.01 | 8.44E-01 |
| NKAIN3        | -1.29 | 9.01E-01 | -2.36 | 9.91E-01 | 0.74  | 2.29E-01 |

|               |       |          |       |          |       |          |
|---------------|-------|----------|-------|----------|-------|----------|
| ZNF773        | -1.29 | 9.01E-01 | -0.64 | 7.40E-01 | -1.56 | 9.41E-01 |
| CTDSP2        | -1.29 | 9.02E-01 | -0.66 | 7.44E-01 | -0.24 | 5.96E-01 |
| SIK1          | -1.29 | 9.02E-01 | -0.18 | 5.72E-01 | 0.60  | 2.76E-01 |
| C2orf47       | -1.29 | 9.02E-01 | -0.89 | 8.12E-01 | -1.67 | 9.53E-01 |
| PARG          | -1.29 | 9.02E-01 | 0.02  | 4.93E-01 | -0.13 | 5.52E-01 |
| ANAPC10       | -1.29 | 9.02E-01 | 0.51  | 3.03E-01 | 0.11  | 4.56E-01 |
| TDO2          | -1.29 | 9.02E-01 | -0.45 | 6.74E-01 | -0.72 | 7.63E-01 |
| EPB41L4A-AS2  | -1.29 | 9.02E-01 | -0.30 | 6.17E-01 | 0.83  | 2.02E-01 |
| DDX6          | -1.29 | 9.02E-01 | 0.16  | 4.36E-01 | -0.59 | 7.22E-01 |
| HELT          | -1.29 | 9.02E-01 | -0.27 | 6.08E-01 | 0.19  | 4.24E-01 |
| CTD-2116N17.1 | -1.29 | 9.02E-01 | -0.68 | 7.51E-01 | -1.26 | 8.97E-01 |
| DDX58         | -1.29 | 9.02E-01 | -1.82 | 9.65E-01 | -1.45 | 9.26E-01 |
| RPS20         | -1.29 | 9.02E-01 | -0.64 | 7.40E-01 | -1.15 | 8.75E-01 |
| TWF1          | -1.29 | 9.02E-01 | -0.02 | 5.09E-01 | -0.06 | 5.22E-01 |
| MOAP1         | -1.30 | 9.02E-01 | -1.03 | 8.48E-01 | -0.59 | 7.22E-01 |
| CMPK1         | -1.30 | 9.02E-01 | 0.95  | 1.72E-01 | 0.84  | 2.00E-01 |
| HTRA3         | -1.30 | 9.02E-01 | -1.02 | 8.47E-01 | -1.35 | 9.11E-01 |
| PUS7          | -1.30 | 9.03E-01 | -0.37 | 6.44E-01 | -0.58 | 7.19E-01 |
| APEX1         | -1.30 | 9.03E-01 | -1.25 | 8.94E-01 | 0.20  | 4.20E-01 |
| RHOU          | -1.30 | 9.03E-01 | 0.09  | 4.64E-01 | -0.09 | 5.36E-01 |
| ELOVL1        | -1.30 | 9.03E-01 | -0.77 | 7.81E-01 | -0.37 | 6.45E-01 |
| WDR73         | -1.30 | 9.03E-01 | -0.03 | 5.12E-01 | 1.09  | 1.39E-01 |
| C1orf198      | -1.30 | 9.03E-01 | 0.32  | 3.73E-01 | -0.21 | 5.85E-01 |
| CCDC42B       | -1.30 | 9.03E-01 | -0.80 | 7.89E-01 | -0.43 | 6.67E-01 |
| SUPT5H        | -1.30 | 9.03E-01 | -0.49 | 6.87E-01 | 0.95  | 1.71E-01 |
| CAPS          | -1.30 | 9.03E-01 | 0.03  | 4.88E-01 | -0.80 | 7.87E-01 |
| ATXN2         | -1.30 | 9.04E-01 | -1.21 | 8.87E-01 | -0.91 | 8.18E-01 |
| MTERFD1       | -1.30 | 9.04E-01 | -0.52 | 6.99E-01 | 0.11  | 4.57E-01 |
| RAB7A         | -1.30 | 9.04E-01 | -0.16 | 5.62E-01 | 0.13  | 4.50E-01 |
| NDUFS8        | -1.30 | 9.04E-01 | -0.96 | 8.33E-01 | -0.20 | 5.79E-01 |
| TFF1          | -1.30 | 9.04E-01 | 0.78  | 2.17E-01 | 0.92  | 1.80E-01 |

|             |       |          |          |          |          |          |          |
|-------------|-------|----------|----------|----------|----------|----------|----------|
| FOXJ2       | -1.30 | 9.04E-01 | 0.84     | 1.99E-01 | 0.26     | 3.96E-01 |          |
| HINT3       | -1.30 | 9.04E-01 | -0.41    | 6.59E-01 | -0.10    | 5.39E-01 |          |
| IKZF5       | -1.30 | 9.04E-01 | -0.19    | 5.77E-01 | 0.16     | 4.35E-01 |          |
| RNF220      | -1.30 | 9.04E-01 | 0.54     | 2.94E-01 | 0.21     | 4.17E-01 |          |
| TMEM216     | -1.30 | 9.04E-01 | -0.89    | 8.13E-01 | -1.25    | 8.95E-01 |          |
| ATRIP       | -1.30 | 9.04E-01 | 0.32     | 3.74E-01 | 0.43     | 3.34E-01 |          |
| LARP1       | -1.31 | 9.04E-01 | -0.37    | 6.44E-01 | 0.51     | 3.05E-01 |          |
| LRG1        | -1.31 | 9.04E-01 | -0.95    | 8.29E-01 | -0.74    | 7.70E-01 |          |
| MACROD1     | -1.31 | 9.04E-01 | -0.25    | 6.00E-01 | -1.03    | 8.49E-01 |          |
| PGLYRP4     | -1.31 | 9.04E-01 | -1.19    | 8.84E-01 | -1.15    | 8.75E-01 |          |
| NUS1        | -1.31 | 9.04E-01 | -1.19    | 8.82E-01 | -0.51    | 6.94E-01 |          |
| GALNT9      | -1.31 | 9.04E-01 | -1.01    | 8.44E-01 | -1.75    | 9.60E-01 |          |
| ZNF592      | -1.31 | 9.05E-01 | -1.05    | 8.53E-01 | -0.02    | 5.06E-01 |          |
| POMGNT1     | -1.31 | 9.05E-01 | 0.11     | 4.57E-01 | 0.94     | 1.74E-01 |          |
| VPS29       | -1.31 | 9.05E-01 | -1.66    | 9.51E-01 | -1.22    | 8.88E-01 |          |
| PEX11A      | -1.31 | 9.05E-01 | 0.02     | 4.93E-01 | -0.61    | 7.29E-01 |          |
| EIF5B       | -1.31 | 9.05E-01 | -0.42    | 6.62E-01 | -0.41    | 6.57E-01 |          |
| MINOS1-NBL1 | -1.31 | 9.05E-01 | -0.37    | 6.44E-01 | -1.51    | 9.34E-01 |          |
| PURA        | -1.31 | 9.05E-01 | -0.81    | 7.91E-01 | -0.58    | 7.21E-01 |          |
| STXBP5      | -1.31 | 9.05E-01 | -0.29    | 6.14E-01 | 0.35     | 3.62E-01 |          |
| AVIL        | -1.31 | 9.05E-01 | -0.67    | 7.50E-01 | -0.73    | 7.68E-01 |          |
| NRN1        | -1.31 | 9.05E-01 | -1.08    | 8.59E-01 | -0.99    | 8.38E-01 |          |
|             | EPN2  | -1.31    | 9.05E-01 | -0.69    | 7.54E-01 | -1.27    | 8.97E-01 |
| PLXNB2      | -1.31 | 9.05E-01 | -0.68    | 7.52E-01 | 0.21     | 4.16E-01 |          |
| CD52        | -1.31 | 9.06E-01 | -1.51    | 9.35E-01 | -0.92    | 8.22E-01 |          |
| SPAM1       | -1.31 | 9.06E-01 | 0.20     | 4.20E-01 | -0.11    | 5.43E-01 |          |
| ANGPTL5     | -1.31 | 9.06E-01 | 0.57     | 2.84E-01 | 0.31     | 3.79E-01 |          |
| PLIN1       | -1.31 | 9.06E-01 | -0.02    | 5.08E-01 | -0.66    | 7.44E-01 |          |
| TAF1C       | -1.31 | 9.06E-01 | 2.20     | 1.39E-02 | 1.62     | 5.27E-02 |          |
| VPREB1      | -1.31 | 9.06E-01 | -1.01    | 8.44E-01 | -1.29    | 9.02E-01 |          |
| SPRR4       | -1.31 | 9.06E-01 | -0.94    | 8.27E-01 | -1.15    | 8.76E-01 |          |



|          |       |          |       |          |       |          |
|----------|-------|----------|-------|----------|-------|----------|
| NTN4     | -1.32 | 9.06E-01 | -0.08 | 5.30E-01 | 0.36  | 3.59E-01 |
| CCDC34   | -1.32 | 9.06E-01 | -0.46 | 6.78E-01 | -2.10 | 9.82E-01 |
| SLAMF6   | -1.32 | 9.06E-01 | 0.28  | 3.88E-01 | -0.66 | 7.47E-01 |
| CLDN20   | -1.32 | 9.06E-01 | -0.93 | 8.23E-01 | -0.44 | 6.72E-01 |
| LRR8D    | -1.32 | 9.06E-01 | -0.62 | 7.32E-01 | -1.48 | 9.31E-01 |
| ZNF479   | -1.32 | 9.06E-01 | 0.57  | 2.83E-01 | 0.71  | 2.38E-01 |
| PSG1     | -1.32 | 9.06E-01 | -1.92 | 9.72E-01 | -0.66 | 7.45E-01 |
| CHST8    | -1.32 | 9.06E-01 | -0.50 | 6.91E-01 | 0.34  | 3.66E-01 |
| TMUB2    | -1.32 | 9.06E-01 | -1.34 | 9.10E-01 | -1.04 | 8.52E-01 |
| CYYR1    | -1.32 | 9.06E-01 | -2.54 | 9.95E-01 | -0.37 | 6.45E-01 |
| UNC5C    | -1.32 | 9.06E-01 | -0.85 | 8.03E-01 | -0.32 | 6.25E-01 |
| FBXO15   | -1.32 | 9.06E-01 | -0.84 | 8.01E-01 | 0.45  | 3.26E-01 |
| EBLN2    | -1.32 | 9.07E-01 | -0.04 | 5.16E-01 | -0.03 | 5.13E-01 |
| NENF     | -1.32 | 9.07E-01 | -0.08 | 5.30E-01 | 0.93  | 1.76E-01 |
| PCYOX1L  | -1.32 | 9.07E-01 | -0.99 | 8.39E-01 | 0.33  | 3.71E-01 |
| ANKLE2   | -1.32 | 9.07E-01 | -1.54 | 9.38E-01 | -0.41 | 6.58E-01 |
| CTNNBIP1 | -1.32 | 9.07E-01 | 0.34  | 3.66E-01 | 0.31  | 3.80E-01 |
| PCNX     | -1.32 | 9.07E-01 | 0.48  | 3.14E-01 | 0.06  | 4.75E-01 |
| ARSA     | -1.32 | 9.07E-01 | -1.69 | 9.54E-01 | -1.06 | 8.55E-01 |
| FAM73A   | -1.32 | 9.07E-01 | -0.80 | 7.87E-01 | 0.83  | 2.04E-01 |
| SUDS3    | -1.32 | 9.07E-01 | -1.06 | 8.56E-01 | -1.13 | 8.70E-01 |
| FAM135A  | -1.32 | 9.07E-01 | -0.36 | 6.39E-01 | 0.22  | 4.12E-01 |
| C5orf22  | -1.32 | 9.07E-01 | -0.93 | 8.23E-01 | -1.44 | 9.25E-01 |
| CTCF     | -1.32 | 9.07E-01 | -1.07 | 8.59E-01 | -0.36 | 6.41E-01 |
| MAP10    | -1.32 | 9.07E-01 | -1.22 | 8.88E-01 | -1.72 | 9.57E-01 |
| DST      | -1.32 | 9.07E-01 | -0.87 | 8.07E-01 | -0.80 | 7.88E-01 |
| SPESP1   | -1.33 | 9.07E-01 | 0.74  | 2.31E-01 | -0.03 | 5.13E-01 |
| HOXB6    | -1.33 | 9.08E-01 | 0.06  | 4.74E-01 | -0.26 | 6.04E-01 |
| ZNFX1    | -1.33 | 9.08E-01 | -0.72 | 7.63E-01 | -1.01 | 8.44E-01 |
| CILP     | -1.33 | 9.08E-01 | 0.57  | 2.86E-01 | 0.90  | 1.85E-01 |
| FBXO39   | -1.33 | 9.08E-01 | 0.17  | 4.32E-01 | 0.18  | 4.27E-01 |

|           |       |          |       |          |       |          |
|-----------|-------|----------|-------|----------|-------|----------|
| STEAP2    | -1.33 | 9.08E-01 | -1.62 | 9.48E-01 | -0.38 | 6.48E-01 |
| COG1      | -1.33 | 9.08E-01 | -1.49 | 9.32E-01 | -0.56 | 7.13E-01 |
| ZNF347    | -1.33 | 9.08E-01 | -0.70 | 7.59E-01 | -0.21 | 5.81E-01 |
| ZFP2      | -1.33 | 9.08E-01 | 0.73  | 2.34E-01 | 0.26  | 3.96E-01 |
| SPRY2     | -1.33 | 9.08E-01 | -0.90 | 8.17E-01 | -1.22 | 8.88E-01 |
| POC1A     | -1.33 | 9.08E-01 | -1.30 | 9.03E-01 | -0.46 | 6.75E-01 |
| MYOF      | -1.33 | 9.08E-01 | -0.48 | 6.84E-01 | 0.41  | 3.42E-01 |
| IRF2BP1   | -1.33 | 9.08E-01 | -0.69 | 7.53E-01 | 0.43  | 3.34E-01 |
| DUSP4     | -1.33 | 9.08E-01 | -0.56 | 7.12E-01 | -1.35 | 9.12E-01 |
| IBSP      | -1.33 | 9.09E-01 | -1.84 | 9.67E-01 | -0.05 | 5.21E-01 |
| FBXW12    | -1.33 | 9.09E-01 | 0.14  | 4.46E-01 | 0.65  | 2.58E-01 |
| TRPM4     | -1.33 | 9.09E-01 | -0.12 | 5.48E-01 | 0.96  | 1.68E-01 |
| ZACN      | -1.33 | 9.09E-01 | 0.15  | 4.39E-01 | 0.16  | 4.38E-01 |
| ETV5      | -1.33 | 9.09E-01 | -1.39 | 9.17E-01 | -0.45 | 6.72E-01 |
| TNP2      | -1.33 | 9.09E-01 | 0.69  | 2.45E-01 | 0.45  | 3.26E-01 |
| RTKN      | -1.33 | 9.09E-01 | -1.18 | 8.82E-01 | -0.64 | 7.39E-01 |
| SERP1     | -1.33 | 9.09E-01 | 0.40  | 3.45E-01 | -0.33 | 6.30E-01 |
| IL17RA    | -1.33 | 9.09E-01 | -1.02 | 8.46E-01 | 0.36  | 3.61E-01 |
| ZNF346    | -1.33 | 9.09E-01 | -0.90 | 8.16E-01 | -2.18 | 9.86E-01 |
| LIPE      | -1.33 | 9.09E-01 | -1.01 | 8.43E-01 | -0.12 | 5.48E-01 |
| TNFAIP8L2 | -1.33 | 9.09E-01 | -0.78 | 7.81E-01 | -2.34 | 9.90E-01 |
| ARG1      | -1.34 | 9.09E-01 | -1.85 | 9.68E-01 | -0.85 | 8.01E-01 |
| DNAH17    | -1.34 | 9.09E-01 | -0.42 | 6.62E-01 | 1.31  | 9.57E-02 |
| KRTAP19-2 | -1.34 | 9.09E-01 | -1.49 | 9.32E-01 | -0.19 | 5.76E-01 |
| KIF3B     | -1.34 | 9.09E-01 | 1.79  | 3.67E-02 | 2.47  | 6.82E-03 |
| MVP       | -1.34 | 9.09E-01 | -0.88 | 8.11E-01 | -0.66 | 7.45E-01 |
| CKM       | -1.34 | 9.09E-01 | -1.05 | 8.54E-01 | -1.28 | 8.99E-01 |
| AGAP2     | -1.34 | 9.10E-01 | -0.83 | 7.96E-01 | -1.34 | 9.09E-01 |
| FAM207A   | -1.34 | 9.10E-01 | -0.94 | 8.25E-01 | -0.30 | 6.17E-01 |
| MTRR      | -1.34 | 9.10E-01 | -0.64 | 7.38E-01 | 0.53  | 3.00E-01 |
| ZBTB26    | -1.34 | 9.10E-01 | -0.66 | 7.44E-01 | -2.65 | 9.96E-01 |

|          |       |          |       |          |       |          |
|----------|-------|----------|-------|----------|-------|----------|
| RIOK3    | -1.34 | 9.10E-01 | -1.31 | 9.06E-01 | -0.16 | 5.65E-01 |
| MS4A14   | -1.34 | 9.10E-01 | 0.05  | 4.82E-01 | 0.38  | 3.50E-01 |
| PPM1L    | -1.34 | 9.10E-01 | -1.91 | 9.72E-01 | -0.70 | 7.58E-01 |
| SGTA     | -1.34 | 9.10E-01 | -1.77 | 9.61E-01 | -1.21 | 8.87E-01 |
| DDIT4L   | -1.34 | 9.10E-01 | 0.40  | 3.45E-01 | 1.84  | 3.31E-02 |
| HIATL1   | -1.34 | 9.10E-01 | -0.14 | 5.54E-01 | 1.27  | 1.01E-01 |
| TNFAIP1  | -1.34 | 9.10E-01 | -0.85 | 8.02E-01 | -1.14 | 8.73E-01 |
| IFI27L1  | -1.34 | 9.10E-01 | -1.28 | 9.00E-01 | -0.11 | 5.43E-01 |
| KAT6B    | -1.34 | 9.10E-01 | 0.42  | 3.39E-01 | 0.68  | 2.49E-01 |
| NMD3     | -1.34 | 9.10E-01 | -0.55 | 7.09E-01 | -0.07 | 5.26E-01 |
| FSBP     | -1.34 | 9.10E-01 | 0.11  | 4.56E-01 | -1.04 | 8.50E-01 |
| ALOXE3   | -1.34 | 9.10E-01 | 1.23  | 1.10E-01 | 0.00  | 5.00E-01 |
| SFRP2    | -1.34 | 9.10E-01 | -0.60 | 7.25E-01 | 0.26  | 3.98E-01 |
| TRPC7    | -1.34 | 9.10E-01 | -1.94 | 9.74E-01 | -0.41 | 6.57E-01 |
| FANCF    | -1.34 | 9.11E-01 | -1.88 | 9.70E-01 | -0.38 | 6.48E-01 |
| PMVK     | -1.35 | 9.11E-01 | -0.94 | 8.26E-01 | -1.34 | 9.10E-01 |
| RFT1     | -1.35 | 9.11E-01 | -0.51 | 6.96E-01 | 0.15  | 4.42E-01 |
| HS6ST1   | -1.35 | 9.11E-01 | -0.77 | 7.78E-01 | 0.54  | 2.93E-01 |
| DARS2    | -1.35 | 9.11E-01 | 0.48  | 3.16E-01 | -0.39 | 6.53E-01 |
| OGG1     | -1.35 | 9.11E-01 | -0.30 | 6.16E-01 | -0.74 | 7.71E-01 |
| KRTAP3-1 | -1.35 | 9.11E-01 | -0.64 | 7.40E-01 | -1.46 | 9.28E-01 |
| SCAPER   | -1.35 | 9.11E-01 | -0.58 | 7.20E-01 | -0.98 | 8.36E-01 |
| GPR137C  | -1.35 | 9.11E-01 | 0.77  | 2.22E-01 | 0.80  | 2.11E-01 |
| NTSR1    | -1.35 | 9.11E-01 | -0.76 | 7.75E-01 | -0.58 | 7.18E-01 |
| NDUFB2   | -1.35 | 9.11E-01 | -0.50 | 6.90E-01 | 0.22  | 4.12E-01 |
| CAPNS1   | -1.35 | 9.11E-01 | 0.16  | 4.35E-01 | 0.11  | 4.57E-01 |
| B3GALNT1 | -1.35 | 9.11E-01 | -1.11 | 8.67E-01 | -1.07 | 8.58E-01 |
| PDYN     | -1.35 | 9.11E-01 | -1.77 | 9.62E-01 | -1.09 | 8.61E-01 |
| GULP1    | -1.35 | 9.11E-01 | -1.48 | 9.31E-01 | 0.49  | 3.13E-01 |
| LGI2     | -1.35 | 9.11E-01 | -0.03 | 5.10E-01 | -0.18 | 5.71E-01 |
| DFNB31   | -1.35 | 9.11E-01 | -0.95 | 8.29E-01 | -1.95 | 9.74E-01 |

|           |       |          |       |          |       |          |
|-----------|-------|----------|-------|----------|-------|----------|
| DHRS9     | -1.35 | 9.12E-01 | 0.68  | 2.49E-01 | 0.22  | 4.15E-01 |
| PAX6      | -1.35 | 9.12E-01 | 0.24  | 4.06E-01 | 0.58  | 2.81E-01 |
| SPAG9     | -1.35 | 9.12E-01 | -0.63 | 7.36E-01 | 0.40  | 3.46E-01 |
| YWHAH     | -1.35 | 9.12E-01 | 0.02  | 4.90E-01 | -0.42 | 6.63E-01 |
| SMAD2     | -1.35 | 9.12E-01 | -1.05 | 8.54E-01 | -0.65 | 7.41E-01 |
| COA4      | -1.35 | 9.12E-01 | -0.82 | 7.94E-01 | 0.46  | 3.21E-01 |
| FNDC1     | -1.35 | 9.12E-01 | -1.28 | 8.99E-01 | -0.96 | 8.30E-01 |
| FCGR3B    | -1.35 | 9.12E-01 | -0.98 | 8.36E-01 | -1.05 | 8.53E-01 |
| ZCCHC4    | -1.35 | 9.12E-01 | -0.23 | 5.91E-01 | -2.61 | 9.95E-01 |
| PABPC1    | -1.35 | 9.12E-01 | -1.50 | 9.33E-01 | -1.02 | 8.45E-01 |
| MAP1LC3B2 | -1.35 | 9.12E-01 | 0.22  | 4.12E-01 | -1.13 | 8.72E-01 |
| TUBB6     | -1.35 | 9.12E-01 | -1.01 | 8.43E-01 | -1.68 | 9.54E-01 |
| ALDOB     | -1.35 | 9.12E-01 | -1.18 | 8.81E-01 | -0.27 | 6.07E-01 |
| OR3A3     | -1.35 | 9.12E-01 | 0.50  | 3.07E-01 | 0.05  | 4.81E-01 |
| BLMH      | -1.35 | 9.12E-01 | -0.96 | 8.31E-01 | -1.32 | 9.07E-01 |
| SCD       | -1.35 | 9.12E-01 | -0.78 | 7.83E-01 | 0.42  | 3.36E-01 |
| SLC8B1    | -1.35 | 9.12E-01 | -1.01 | 8.45E-01 | -1.88 | 9.70E-01 |
| SLC17A8   | -1.35 | 9.12E-01 | -1.97 | 9.75E-01 | -0.30 | 6.19E-01 |
| EPHA1     | -1.35 | 9.12E-01 | 0.28  | 3.88E-01 | 0.45  | 3.26E-01 |
| NAP1L5    | -1.35 | 9.12E-01 | -1.23 | 8.90E-01 | -1.34 | 9.10E-01 |
| MOGAT3    | -1.35 | 9.12E-01 | -0.82 | 7.95E-01 | -1.18 | 8.81E-01 |
| HEATR6    | -1.35 | 9.12E-01 | -0.24 | 5.93E-01 | -0.62 | 7.32E-01 |
| GIMAP4    | -1.36 | 9.12E-01 | -0.64 | 7.40E-01 | -1.21 | 8.87E-01 |
| ZNF358    | -1.36 | 9.12E-01 | -0.08 | 5.32E-01 | 0.01  | 4.95E-01 |
| DYNLT1    | -1.36 | 9.12E-01 | 0.01  | 4.95E-01 | -0.02 | 5.09E-01 |
| TRAPPC3   | -1.36 | 9.12E-01 | -1.21 | 8.86E-01 | -1.48 | 9.31E-01 |
| SPNS3     | -1.36 | 9.12E-01 | -0.19 | 5.74E-01 | 1.04  | 1.49E-01 |
| HTR1A     | -1.36 | 9.13E-01 | -0.87 | 8.09E-01 | -1.59 | 9.44E-01 |
| TCTN1     | -1.36 | 9.13E-01 | -2.41 | 9.92E-01 | -1.55 | 9.39E-01 |
| HELZ2     | -1.36 | 9.13E-01 | -0.16 | 5.62E-01 | -0.35 | 6.36E-01 |
| ZNF287    | -1.36 | 9.13E-01 | 0.69  | 2.45E-01 | 0.94  | 1.74E-01 |

|          |       |          |       |          |       |          |
|----------|-------|----------|-------|----------|-------|----------|
| OTUD3    | -1.36 | 9.13E-01 | -0.04 | 5.17E-01 | 0.78  | 2.17E-01 |
| TCF20    | -1.36 | 9.13E-01 | -1.08 | 8.60E-01 | -1.18 | 8.81E-01 |
| ZFAND2A  | -1.36 | 9.13E-01 | -0.41 | 6.58E-01 | 0.00  | 5.02E-01 |
| BAZ1B    | -1.36 | 9.13E-01 | -1.50 | 9.33E-01 | -0.95 | 8.30E-01 |
| ZNF532   | -1.36 | 9.13E-01 | -2.07 | 9.81E-01 | -0.70 | 7.59E-01 |
| C19orf82 | -1.36 | 9.13E-01 | -1.11 | 8.67E-01 | -0.21 | 5.83E-01 |
| BRK1     | -1.36 | 9.13E-01 | -0.51 | 6.96E-01 | -0.70 | 7.57E-01 |
| AKAP9    | -1.36 | 9.13E-01 | -0.56 | 7.12E-01 | -0.04 | 5.17E-01 |
| EML4     | -1.36 | 9.13E-01 | -0.42 | 6.62E-01 | -0.51 | 6.96E-01 |
| ARL14    | -1.36 | 9.13E-01 | -0.56 | 7.14E-01 | 0.49  | 3.12E-01 |
| EXOG     | -1.36 | 9.13E-01 | -0.89 | 8.14E-01 | 0.40  | 3.46E-01 |
| FAXDC2   | -1.36 | 9.13E-01 | -0.15 | 5.60E-01 | 0.17  | 4.32E-01 |
| ARHGEF28 | -1.36 | 9.13E-01 | -1.11 | 8.67E-01 | -1.16 | 8.77E-01 |
| SCN4B    | -1.36 | 9.13E-01 | -0.72 | 7.65E-01 | -0.81 | 7.92E-01 |
| NMNAT1   | -1.36 | 9.13E-01 | 0.62  | 2.66E-01 | 1.85  | 3.18E-02 |
| CRHBP    | -1.36 | 9.13E-01 | -1.24 | 8.93E-01 | -0.58 | 7.20E-01 |
| DIP2C    | -1.36 | 9.13E-01 | -2.36 | 9.91E-01 | -1.17 | 8.79E-01 |
| FCRL3    | -1.36 | 9.13E-01 | -0.81 | 7.90E-01 | -0.29 | 6.15E-01 |
| PIK3C2G  | -1.36 | 9.14E-01 | -0.10 | 5.40E-01 | 0.33  | 3.70E-01 |
| PLEKHM3  | -1.36 | 9.14E-01 | 0.78  | 2.19E-01 | -0.03 | 5.13E-01 |
| KCTD1    | -1.36 | 9.14E-01 | -2.26 | 9.88E-01 | -0.43 | 6.68E-01 |
| SRSF5    | -1.36 | 9.14E-01 | -0.82 | 7.95E-01 | -1.51 | 9.34E-01 |
| C2orf53  | -1.36 | 9.14E-01 | -1.31 | 9.06E-01 | -1.29 | 9.01E-01 |
| NEUROG3  | -1.36 | 9.14E-01 | -0.03 | 5.12E-01 | -0.30 | 6.19E-01 |
| PRODH    | -1.36 | 9.14E-01 | -0.52 | 7.00E-01 | 0.10  | 4.61E-01 |
| PDCD10   | -1.36 | 9.14E-01 | 0.25  | 4.01E-01 | 0.87  | 1.92E-01 |
| PLOD1    | -1.37 | 9.14E-01 | -0.54 | 7.06E-01 | -0.81 | 7.92E-01 |
| FBXL12   | -1.37 | 9.14E-01 | -1.13 | 8.70E-01 | -0.35 | 6.36E-01 |
| PPIC     | -1.37 | 9.14E-01 | -0.32 | 6.24E-01 | -1.21 | 8.86E-01 |
| SLCO1A2  | -1.37 | 9.14E-01 | -0.55 | 7.10E-01 | -2.73 | 9.97E-01 |
| CAMK1    | -1.37 | 9.14E-01 | -0.39 | 6.53E-01 | -0.64 | 7.40E-01 |

|              |       |          |       |          |       |          |
|--------------|-------|----------|-------|----------|-------|----------|
| NACA2        | -1.37 | 9.14E-01 | -0.38 | 6.48E-01 | -0.51 | 6.94E-01 |
| RCAN2        | -1.37 | 9.14E-01 | -1.00 | 8.42E-01 | -0.86 | 8.05E-01 |
| BPIFC        | -1.37 | 9.14E-01 | -1.31 | 9.05E-01 | -1.90 | 9.71E-01 |
| ZFAND3       | -1.37 | 9.14E-01 | -1.03 | 8.49E-01 | -1.45 | 9.26E-01 |
| THOP1        | -1.37 | 9.14E-01 | 0.32  | 3.75E-01 | 0.50  | 3.08E-01 |
| ANKMY1       | -1.37 | 9.14E-01 | 0.09  | 4.62E-01 | -0.29 | 6.16E-01 |
| INMT-FAM188B | -1.37 | 9.14E-01 | 0.68  | 2.48E-01 | 0.01  | 4.96E-01 |
| FAM71F1      | -1.37 | 9.14E-01 | -0.68 | 7.52E-01 | -1.61 | 9.47E-01 |
| FAM26D       | -1.37 | 9.15E-01 | -0.28 | 6.09E-01 | -0.51 | 6.95E-01 |
| CP           | -1.37 | 9.15E-01 | -1.29 | 9.01E-01 | 0.09  | 4.63E-01 |
| FUT3         | -1.37 | 9.15E-01 | -1.62 | 9.47E-01 | -0.90 | 8.15E-01 |
| MAML2        | -1.37 | 9.15E-01 | -1.10 | 8.65E-01 | -1.36 | 9.13E-01 |
| CD1A         | -1.37 | 9.15E-01 | -0.44 | 6.72E-01 | -1.90 | 9.71E-01 |
| WDR20        | -1.37 | 9.15E-01 | -0.22 | 5.85E-01 | -0.87 | 8.07E-01 |
| EMP1         | -1.37 | 9.15E-01 | 0.18  | 4.28E-01 | 0.44  | 3.32E-01 |
| PRDM7        | -1.37 | 9.15E-01 | -0.24 | 5.94E-01 | 0.73  | 2.34E-01 |
| ARPC5        | -1.37 | 9.15E-01 | -0.66 | 7.45E-01 | -1.06 | 8.55E-01 |
| GAST         | -1.37 | 9.15E-01 | 0.61  | 2.71E-01 | 0.33  | 3.71E-01 |
| TACR1        | -1.37 | 9.15E-01 | -0.45 | 6.74E-01 | -1.10 | 8.64E-01 |
| UTS2B        | -1.37 | 9.15E-01 | -0.73 | 7.67E-01 | 0.26  | 3.99E-01 |
| SLC26A2      | -1.37 | 9.15E-01 | -0.71 | 7.61E-01 | -0.60 | 7.25E-01 |
| COA1         | -1.37 | 9.15E-01 | -0.27 | 6.07E-01 | -1.06 | 8.55E-01 |
| ACAP1        | -1.37 | 9.15E-01 | -1.82 | 9.66E-01 | -1.10 | 8.64E-01 |
| PDGFRL       | -1.37 | 9.15E-01 | -0.27 | 6.08E-01 | 0.33  | 3.72E-01 |
| ZNF71        | -1.37 | 9.15E-01 | -0.14 | 5.54E-01 | 0.22  | 4.12E-01 |
| hsa-mir-1199 | -1.37 | 9.15E-01 | -1.13 | 8.72E-01 | -0.81 | 7.92E-01 |
| EIF3D        | -1.37 | 9.15E-01 | -0.10 | 5.39E-01 | -0.50 | 6.91E-01 |
| DNAJC16      | -1.38 | 9.15E-01 | -0.67 | 7.49E-01 | -0.12 | 5.46E-01 |
| RNF135       | -1.38 | 9.15E-01 | 0.05  | 4.82E-01 | -0.10 | 5.40E-01 |
| PTCRA        | -1.38 | 9.16E-01 | -0.38 | 6.48E-01 | -0.01 | 5.04E-01 |
| TEF          | -1.38 | 9.16E-01 | -1.25 | 8.94E-01 | -0.94 | 8.27E-01 |

|            |       |          |       |          |       |          |
|------------|-------|----------|-------|----------|-------|----------|
| KCTD21     | -1.38 | 9.16E-01 | -0.40 | 6.54E-01 | 0.09  | 4.63E-01 |
| CRY1       | -1.38 | 9.16E-01 | -0.80 | 7.89E-01 | 0.42  | 3.38E-01 |
| PCBP4      | -1.38 | 9.16E-01 | -2.03 | 9.79E-01 | -1.11 | 8.66E-01 |
| GK5        | -1.38 | 9.16E-01 | -1.43 | 9.23E-01 | -1.15 | 8.75E-01 |
| SMR3A      | -1.38 | 9.16E-01 | -1.80 | 9.64E-01 | -1.43 | 9.24E-01 |
| IL4I1      | -1.38 | 9.16E-01 | -0.32 | 6.24E-01 | 0.43  | 3.35E-01 |
| SEZ6L2     | -1.38 | 9.17E-01 | -1.03 | 8.48E-01 | -0.78 | 7.82E-01 |
| FBXL6      | -1.38 | 9.17E-01 | -1.13 | 8.70E-01 | -0.32 | 6.27E-01 |
| ZNF304     | -1.38 | 9.17E-01 | -0.55 | 7.07E-01 | -0.29 | 6.14E-01 |
| NTRK2      | -1.38 | 9.17E-01 | -1.26 | 8.95E-01 | -0.73 | 7.66E-01 |
| HOXC12     | -1.38 | 9.17E-01 | -0.38 | 6.46E-01 | -0.50 | 6.90E-01 |
| C5orf52    | -1.38 | 9.17E-01 | -0.21 | 5.82E-01 | 0.33  | 3.71E-01 |
| APOBEC3D   | -1.38 | 9.17E-01 | -0.40 | 6.55E-01 | -1.70 | 9.55E-01 |
| RET        | -1.38 | 9.17E-01 | -1.17 | 8.80E-01 | -0.21 | 5.82E-01 |
| CIPC       | -1.39 | 9.17E-01 | 0.28  | 3.91E-01 | 0.02  | 4.92E-01 |
| MYPOP      | -1.39 | 9.17E-01 | -0.22 | 5.85E-01 | -0.14 | 5.54E-01 |
| FAM153B    | -1.39 | 9.17E-01 | -1.49 | 9.32E-01 | -1.06 | 8.55E-01 |
| RAPGEF3    | -1.39 | 9.17E-01 | -0.63 | 7.36E-01 | -1.04 | 8.52E-01 |
| FAM172A    | -1.39 | 9.17E-01 | -0.89 | 8.13E-01 | 0.17  | 4.34E-01 |
| TMX4       | -1.39 | 9.18E-01 | -0.05 | 5.20E-01 | 0.08  | 4.70E-01 |
| PPIB       | -1.39 | 9.18E-01 | -0.96 | 8.32E-01 | -0.66 | 7.44E-01 |
| IGDCC3     | -1.39 | 9.18E-01 | -1.39 | 9.17E-01 | 0.88  | 1.90E-01 |
| CFHR1      | -1.39 | 9.18E-01 | -1.60 | 9.45E-01 | -0.90 | 8.16E-01 |
| CD300LG    | -1.39 | 9.18E-01 | -0.62 | 7.32E-01 | -1.65 | 9.50E-01 |
| LRRD1      | -1.39 | 9.18E-01 | -0.87 | 8.07E-01 | -0.59 | 7.23E-01 |
| ST6GALNAC4 | -1.39 | 9.18E-01 | -0.92 | 8.21E-01 | -1.73 | 9.58E-01 |
| ACOT11     | -1.39 | 9.18E-01 | -0.42 | 6.63E-01 | -0.37 | 6.43E-01 |
| PLCB3      | -1.39 | 9.18E-01 | 0.18  | 4.27E-01 | -1.01 | 8.44E-01 |
| DPY19L1    | -1.39 | 9.18E-01 | -1.65 | 9.51E-01 | -1.12 | 8.68E-01 |
| CANT1      | -1.39 | 9.18E-01 | -0.88 | 8.11E-01 | 0.60  | 2.75E-01 |
| C9orf85    | -1.39 | 9.18E-01 | -0.71 | 7.61E-01 | -0.57 | 7.14E-01 |

|          |       |          |       |          |       |          |
|----------|-------|----------|-------|----------|-------|----------|
| NEDD4L   | -1.39 | 9.18E-01 | -0.61 | 7.28E-01 | -2.24 | 9.87E-01 |
| POLR2G   | -1.39 | 9.18E-01 | -0.99 | 8.39E-01 | -0.14 | 5.54E-01 |
| DBI      | -1.39 | 9.18E-01 | -0.88 | 8.11E-01 | -0.86 | 8.06E-01 |
| SPRR2B   | -1.40 | 9.19E-01 | -1.24 | 8.92E-01 | -1.23 | 8.91E-01 |
| KRT35    | -1.40 | 9.19E-01 | -1.02 | 8.47E-01 | -0.56 | 7.11E-01 |
| CCDC140  | -1.40 | 9.19E-01 | -0.12 | 5.49E-01 | 0.90  | 1.85E-01 |
| ZNF581   | -1.40 | 9.19E-01 | -0.24 | 5.94E-01 | 0.78  | 2.16E-01 |
| OFCC1    | -1.40 | 9.19E-01 | -1.19 | 8.83E-01 | -0.98 | 8.37E-01 |
| SLC47A1  | -1.40 | 9.19E-01 | -0.56 | 7.11E-01 | -0.75 | 7.73E-01 |
| APBB2    | -1.40 | 9.19E-01 | -0.84 | 8.00E-01 | -0.24 | 5.95E-01 |
| B4GALT6  | -1.40 | 9.19E-01 | -1.06 | 8.55E-01 | -1.12 | 8.69E-01 |
| MYL5     | -1.40 | 9.19E-01 | -0.36 | 6.40E-01 | -0.44 | 6.70E-01 |
| COPS7A   | -1.40 | 9.19E-01 | -0.04 | 5.17E-01 | 0.50  | 3.10E-01 |
| TGFB1I1  | -1.40 | 9.19E-01 | -0.23 | 5.91E-01 | -1.12 | 8.68E-01 |
| PTOV1    | -1.40 | 9.19E-01 | -0.84 | 7.98E-01 | -1.56 | 9.41E-01 |
| CCDC64B  | -1.40 | 9.20E-01 | -1.01 | 8.43E-01 | -1.83 | 9.66E-01 |
| GPR12    | -1.40 | 9.20E-01 | 0.18  | 4.30E-01 | -0.74 | 7.70E-01 |
| SMAD1    | -1.40 | 9.20E-01 | -0.78 | 7.81E-01 | 0.32  | 3.74E-01 |
| IFNAR2   | -1.40 | 9.20E-01 | -0.64 | 7.39E-01 | -0.30 | 6.20E-01 |
| PRKAA2   | -1.40 | 9.20E-01 | -0.38 | 6.48E-01 | -1.39 | 9.17E-01 |
| EEFSEC   | -1.40 | 9.20E-01 | -0.64 | 7.40E-01 | -0.31 | 6.23E-01 |
| FAM151A  | -1.40 | 9.20E-01 | -0.54 | 7.04E-01 | 0.25  | 4.02E-01 |
| AURKC    | -1.40 | 9.20E-01 | -0.16 | 5.63E-01 | -0.60 | 7.25E-01 |
| HDAC11   | -1.40 | 9.20E-01 | -0.47 | 6.80E-01 | -1.64 | 9.50E-01 |
| ABCA3    | -1.40 | 9.20E-01 | -1.64 | 9.49E-01 | -0.90 | 8.15E-01 |
| PTCHD4   | -1.41 | 9.20E-01 | 0.28  | 3.89E-01 | -0.06 | 5.25E-01 |
| SLC8A1   | -1.41 | 9.20E-01 | -0.96 | 8.30E-01 | -1.05 | 8.54E-01 |
| RIPK2    | -1.41 | 9.20E-01 | 0.49  | 3.11E-01 | -0.32 | 6.25E-01 |
| GPATCH2L | -1.41 | 9.20E-01 | -0.45 | 6.73E-01 | -1.41 | 9.21E-01 |
| NADK2    | -1.41 | 9.20E-01 | -1.56 | 9.41E-01 | -1.25 | 8.95E-01 |
| STOX1    | -1.41 | 9.20E-01 | -1.82 | 9.66E-01 | -0.99 | 8.39E-01 |



|            |       |          |       |          |       |          |
|------------|-------|----------|-------|----------|-------|----------|
| SYNDIG1L   | -1.41 | 9.20E-01 | 0.11  | 4.57E-01 | 0.55  | 2.91E-01 |
| CDC25C     | -1.41 | 9.20E-01 | -0.83 | 7.97E-01 | -0.36 | 6.40E-01 |
| CAPN5      | -1.41 | 9.20E-01 | -0.42 | 6.63E-01 | -0.50 | 6.91E-01 |
| PRIMA1     | -1.41 | 9.21E-01 | -1.68 | 9.53E-01 | -0.55 | 7.10E-01 |
| CCDC152    | -1.41 | 9.21E-01 | -1.28 | 9.00E-01 | -0.91 | 8.18E-01 |
| NIPAL2     | -1.41 | 9.21E-01 | -0.59 | 7.23E-01 | 1.54  | 6.15E-02 |
| OR5K3      | -1.41 | 9.21E-01 | 0.39  | 3.47E-01 | 0.32  | 3.74E-01 |
| MS4A4A     | -1.41 | 9.21E-01 | -2.32 | 9.90E-01 | -0.47 | 6.82E-01 |
| TBP        | -1.41 | 9.21E-01 | -0.75 | 7.73E-01 | 0.43  | 3.35E-01 |
| CASKIN1    | -1.41 | 9.21E-01 | -0.92 | 8.21E-01 | -1.07 | 8.58E-01 |
| RPIA       | -1.41 | 9.21E-01 | -1.24 | 8.92E-01 | -0.78 | 7.82E-01 |
| GLUD1      | -1.41 | 9.21E-01 | -2.57 | 9.95E-01 | -0.45 | 6.75E-01 |
| MEP1B      | -1.41 | 9.21E-01 | -1.54 | 9.39E-01 | -0.32 | 6.27E-01 |
| COL5A3     | -1.41 | 9.21E-01 | 0.72  | 2.36E-01 | -1.43 | 9.23E-01 |
| KRTAP8-1   | -1.41 | 9.21E-01 | -0.39 | 6.52E-01 | -0.68 | 7.52E-01 |
| BCL2L15    | -1.41 | 9.21E-01 | -0.96 | 8.32E-01 | -1.10 | 8.64E-01 |
| PFKL       | -1.41 | 9.21E-01 | -0.20 | 5.80E-01 | -1.16 | 8.77E-01 |
| TMEM249    | -1.41 | 9.21E-01 | -0.68 | 7.52E-01 | -0.51 | 6.94E-01 |
| PFN1       | -1.41 | 9.21E-01 | -0.74 | 7.70E-01 | -0.04 | 5.18E-01 |
| AQP9       | -1.42 | 9.22E-01 | -1.16 | 8.77E-01 | -0.53 | 7.01E-01 |
| ST6GALNAC6 | -1.42 | 9.22E-01 | -1.50 | 9.33E-01 | -1.53 | 9.37E-01 |
| TMEM57     | -1.42 | 9.22E-01 | 1.00  | 1.59E-01 | 1.12  | 1.31E-01 |
| AGO2       | -1.42 | 9.22E-01 | -2.11 | 9.83E-01 | -0.54 | 7.06E-01 |
| COL6A2     | -1.42 | 9.22E-01 | -1.74 | 9.59E-01 | -0.97 | 8.34E-01 |
| ELMOD3     | -1.42 | 9.22E-01 | -0.03 | 5.11E-01 | 0.38  | 3.52E-01 |
| WDR18      | -1.42 | 9.22E-01 | -0.72 | 7.63E-01 | -0.13 | 5.51E-01 |
| PVRL4      | -1.42 | 9.22E-01 | -0.18 | 5.70E-01 | 0.51  | 3.06E-01 |
| CLEC2D     | -1.42 | 9.23E-01 | -1.65 | 9.51E-01 | 0.16  | 4.36E-01 |
| EF3        | -1.42 | 9.23E-01 | -1.11 | 8.67E-01 | -0.22 | 5.87E-01 |
| KCNA7      | -1.42 | 9.23E-01 | 0.12  | 4.54E-01 | -0.43 | 6.66E-01 |
| FBP1       | -1.42 | 9.23E-01 | -0.37 | 6.44E-01 | -0.76 | 7.77E-01 |

|              |       |          |       |          |       |          |
|--------------|-------|----------|-------|----------|-------|----------|
| PAPSS1       | -1.42 | 9.23E-01 | -0.40 | 6.55E-01 | 0.00  | 5.01E-01 |
| DRC1         | -1.42 | 9.23E-01 | -0.57 | 7.16E-01 | -0.19 | 5.74E-01 |
| EDC3         | -1.42 | 9.23E-01 | -1.80 | 9.64E-01 | -0.54 | 7.05E-01 |
| UXS1         | -1.42 | 9.23E-01 | -0.23 | 5.91E-01 | 1.18  | 1.19E-01 |
| HOXC4        | -1.42 | 9.23E-01 | -0.82 | 7.94E-01 | -1.02 | 8.47E-01 |
| SLC4A5       | -1.42 | 9.23E-01 | -1.02 | 8.46E-01 | -0.15 | 5.59E-01 |
| SLC25A34     | -1.43 | 9.23E-01 | -1.31 | 9.04E-01 | -1.55 | 9.40E-01 |
| CD300E       | -1.43 | 9.23E-01 | -1.15 | 8.76E-01 | -1.59 | 9.44E-01 |
| TJAP1        | -1.43 | 9.23E-01 | -0.72 | 7.65E-01 | -0.69 | 7.56E-01 |
| ZBTB22       | -1.43 | 9.23E-01 | -0.29 | 6.14E-01 | -0.28 | 6.12E-01 |
| MAMDC4       | -1.43 | 9.23E-01 | -0.59 | 7.23E-01 | -0.63 | 7.35E-01 |
| GTPBP10      | -1.43 | 9.23E-01 | -0.88 | 8.11E-01 | 0.48  | 3.15E-01 |
| C7orf72      | -1.43 | 9.23E-01 | -0.50 | 6.91E-01 | -0.43 | 6.65E-01 |
| DCDC2        | -1.43 | 9.24E-01 | -1.18 | 8.81E-01 | -2.51 | 9.94E-01 |
| CCKAR        | -1.43 | 9.24E-01 | -0.27 | 6.05E-01 | -1.55 | 9.39E-01 |
| POLD2        | -1.43 | 9.24E-01 | 0.09  | 4.66E-01 | -0.50 | 6.92E-01 |
| SPATA3       | -1.43 | 9.24E-01 | -1.01 | 8.44E-01 | -1.27 | 8.98E-01 |
| C16orf72     | -1.43 | 9.24E-01 | -1.53 | 9.37E-01 | -0.98 | 8.35E-01 |
| CCDC85A      | -1.44 | 9.24E-01 | -1.08 | 8.61E-01 | -2.29 | 9.89E-01 |
| CAV3         | -1.44 | 9.25E-01 | -0.90 | 8.16E-01 | -0.12 | 5.49E-01 |
| BPIFB2       | -1.44 | 9.25E-01 | -0.34 | 6.34E-01 | 0.16  | 4.35E-01 |
| ALS2CL       | -1.44 | 9.25E-01 | -1.46 | 9.28E-01 | -0.82 | 7.95E-01 |
| MYCL         | -1.44 | 9.25E-01 | -2.94 | 9.98E-01 | -0.61 | 7.28E-01 |
| GOPC         | -1.44 | 9.25E-01 | -0.93 | 8.24E-01 | -1.32 | 9.06E-01 |
| DARS         | -1.44 | 9.25E-01 | -1.46 | 9.28E-01 | -1.26 | 8.96E-01 |
| TMED7-TICAM2 | -1.44 | 9.25E-01 | -0.43 | 6.65E-01 | -1.64 | 9.49E-01 |
| TICAM2       | -1.44 | 9.25E-01 | -0.43 | 6.65E-01 | -1.64 | 9.49E-01 |
| DTYMK        | -1.44 | 9.25E-01 | -1.95 | 9.74E-01 | -0.68 | 7.52E-01 |
| EOMES        | -1.44 | 9.25E-01 | -0.48 | 6.84E-01 | 0.27  | 3.92E-01 |
| C16orf92     | -1.44 | 9.25E-01 | -0.28 | 6.11E-01 | 0.06  | 4.75E-01 |
| APLP2        | -1.44 | 9.25E-01 | 0.99  | 1.62E-01 | 0.31  | 3.77E-01 |

|               |       |          |       |          |       |          |
|---------------|-------|----------|-------|----------|-------|----------|
| MS4A6E        | -1.44 | 9.25E-01 | 0.41  | 3.39E-01 | 0.37  | 3.58E-01 |
| RP11-480I12.4 | -1.44 | 9.26E-01 | -0.30 | 6.18E-01 | -0.56 | 7.12E-01 |
| WDR43         | -1.44 | 9.26E-01 | 0.11  | 4.55E-01 | -0.65 | 7.43E-01 |
| PP13004       | -1.44 | 9.26E-01 | -1.42 | 9.22E-01 | -1.87 | 9.69E-01 |
| CELF3         | -1.44 | 9.26E-01 | -0.86 | 8.05E-01 | -2.12 | 9.83E-01 |
| ZNF483        | -1.45 | 9.26E-01 | -1.86 | 9.69E-01 | -0.20 | 5.79E-01 |
| TBC1D2B       | -1.45 | 9.26E-01 | -0.89 | 8.13E-01 | -0.29 | 6.13E-01 |
| PBXIP1        | -1.45 | 9.26E-01 | 0.62  | 2.68E-01 | -0.85 | 8.03E-01 |
| FABP6         | -1.45 | 9.26E-01 | -1.96 | 9.75E-01 | -0.65 | 7.41E-01 |
| SLIRP         | -1.45 | 9.26E-01 | -1.46 | 9.27E-01 | -1.60 | 9.45E-01 |
| ITPK1         | -1.45 | 9.26E-01 | -0.45 | 6.73E-01 | 0.66  | 2.55E-01 |
| OMP           | -1.45 | 9.26E-01 | -0.86 | 8.06E-01 | -0.35 | 6.37E-01 |
| CCER2         | -1.45 | 9.26E-01 | -1.26 | 8.96E-01 | -1.33 | 9.07E-01 |
| N4BP2L1       | -1.45 | 9.26E-01 | -1.66 | 9.52E-01 | 0.10  | 4.62E-01 |
| DCBLD1        | -1.45 | 9.26E-01 | -0.49 | 6.86E-01 | -1.34 | 9.10E-01 |
| ALKBH1        | -1.45 | 9.27E-01 | -1.38 | 9.16E-01 | -1.91 | 9.72E-01 |
| VCAM1         | -1.45 | 9.27E-01 | -1.10 | 8.65E-01 | -0.05 | 5.21E-01 |
| MYO1B         | -1.45 | 9.27E-01 | 0.02  | 4.90E-01 | 0.19  | 4.25E-01 |
| MS4A1         | -1.45 | 9.27E-01 | -0.19 | 5.74E-01 | 0.42  | 3.38E-01 |
| C7orf13       | -1.45 | 9.27E-01 | -0.57 | 7.15E-01 | -1.21 | 8.87E-01 |
| SPECC1        | -1.45 | 9.27E-01 | -0.48 | 6.84E-01 | -1.03 | 8.47E-01 |
| OR9Q1         | -1.45 | 9.27E-01 | -0.95 | 8.29E-01 | -0.98 | 8.36E-01 |
| AK8           | -1.45 | 9.27E-01 | -0.56 | 7.12E-01 | -0.35 | 6.38E-01 |
| PARL          | -1.45 | 9.27E-01 | 1.32  | 9.30E-02 | 1.03  | 1.51E-01 |
| IGFBP6        | -1.46 | 9.27E-01 | -0.03 | 5.13E-01 | -0.42 | 6.64E-01 |
| TBC1D7        | -1.46 | 9.27E-01 | 1.31  | 9.54E-02 | 0.78  | 2.17E-01 |
| ZNF580        | -1.46 | 9.27E-01 | -0.10 | 5.39E-01 | 0.85  | 1.98E-01 |
| CLK4          | -1.46 | 9.27E-01 | -0.93 | 8.24E-01 | -1.79 | 9.63E-01 |
| STX16         | -1.46 | 9.27E-01 | -0.50 | 6.91E-01 | 0.36  | 3.58E-01 |
| SCRN1         | -1.46 | 9.27E-01 | -1.30 | 9.03E-01 | -0.54 | 7.07E-01 |
| CPNE8         | -1.46 | 9.27E-01 | -0.86 | 8.06E-01 | -0.81 | 7.92E-01 |

|              |       |          |       |          |       |          |
|--------------|-------|----------|-------|----------|-------|----------|
| SH2D1B       | -1.46 | 9.27E-01 | 0.49  | 3.12E-01 | 0.56  | 2.87E-01 |
| C17orf99     | -1.46 | 9.28E-01 | -1.56 | 9.41E-01 | -1.32 | 9.06E-01 |
| PCNP         | -1.46 | 9.28E-01 | -1.24 | 8.93E-01 | -1.59 | 9.44E-01 |
| BTG1         | -1.46 | 9.28E-01 | -1.37 | 9.14E-01 | -0.87 | 8.08E-01 |
| SLC7A2       | -1.46 | 9.28E-01 | -1.58 | 9.43E-01 | -0.05 | 5.21E-01 |
| MAL2         | -1.46 | 9.28E-01 | -0.72 | 7.63E-01 | -1.24 | 8.93E-01 |
| RP9          | -1.46 | 9.28E-01 | -1.39 | 9.17E-01 | -0.17 | 5.66E-01 |
| MEIS3        | -1.46 | 9.28E-01 | -1.96 | 9.75E-01 | -0.67 | 7.50E-01 |
| CECR5        | -1.46 | 9.28E-01 | -1.12 | 8.68E-01 | -0.68 | 7.52E-01 |
| FAM215A      | -1.46 | 9.28E-01 | 0.03  | 4.86E-01 | 0.13  | 4.47E-01 |
| IDI1         | -1.46 | 9.28E-01 | -1.52 | 9.35E-01 | -0.25 | 5.98E-01 |
| C7orf63      | -1.46 | 9.28E-01 | -1.44 | 9.24E-01 | -0.19 | 5.77E-01 |
| HOPX         | -1.46 | 9.28E-01 | -1.07 | 8.57E-01 | -0.40 | 6.54E-01 |
| IFNA8        | -1.46 | 9.28E-01 | -1.49 | 9.32E-01 | -1.34 | 9.09E-01 |
| ABCA13       | -1.46 | 9.28E-01 | -0.26 | 6.04E-01 | -1.06 | 8.55E-01 |
| AGMAT        | -1.46 | 9.28E-01 | -0.83 | 7.95E-01 | -0.34 | 6.32E-01 |
| ARL14EP      | -1.47 | 9.29E-01 | -0.54 | 7.05E-01 | -0.93 | 8.24E-01 |
| STEAP1       | -1.47 | 9.29E-01 | -1.76 | 9.61E-01 | -0.33 | 6.29E-01 |
| KIAA1671     | -1.47 | 9.29E-01 | -0.60 | 7.26E-01 | -0.30 | 6.18E-01 |
| ABHD14A-ACY1 | -1.47 | 9.29E-01 | -0.94 | 8.26E-01 | -2.08 | 9.81E-01 |
| ACY1         | -1.47 | 9.29E-01 | -0.94 | 8.26E-01 | -2.08 | 9.81E-01 |
| TMEM52B      | -1.47 | 9.29E-01 | 0.00  | 5.00E-01 | -1.15 | 8.76E-01 |
| ADH6         | -1.47 | 9.29E-01 | -0.25 | 5.98E-01 | -1.69 | 9.54E-01 |
| TCF7L1       | -1.47 | 9.29E-01 | -0.73 | 7.68E-01 | -1.32 | 9.07E-01 |
| CAPN1        | -1.47 | 9.29E-01 | 1.22  | 1.12E-01 | 0.52  | 3.02E-01 |
| C6orf211     | -1.47 | 9.29E-01 | -0.96 | 8.32E-01 | -0.81 | 7.92E-01 |
| CPN2         | -1.47 | 9.29E-01 | -0.41 | 6.61E-01 | 0.31  | 3.80E-01 |
| EIF2S2       | -1.47 | 9.29E-01 | 0.30  | 3.81E-01 | 0.45  | 3.25E-01 |
| FBXO43       | -1.47 | 9.30E-01 | -1.10 | 8.64E-01 | -0.41 | 6.59E-01 |
| FMO2         | -1.47 | 9.30E-01 | -0.17 | 5.69E-01 | -0.13 | 5.53E-01 |
| FKBP2        | -1.47 | 9.30E-01 | 1.24  | 1.08E-01 | 1.31  | 9.52E-02 |

|         |       |          |       |          |       |          |
|---------|-------|----------|-------|----------|-------|----------|
| CLYBL   | -1.47 | 9.30E-01 | -0.97 | 8.34E-01 | -0.81 | 7.92E-01 |
| COX20   | -1.47 | 9.30E-01 | -2.11 | 9.83E-01 | -1.30 | 9.03E-01 |
| ARHGAP8 | -1.48 | 9.30E-01 | -0.94 | 8.26E-01 | -1.39 | 9.18E-01 |
| IFFO2   | -1.48 | 9.30E-01 | -2.08 | 9.81E-01 | -0.99 | 8.39E-01 |
| CUX2    | -1.48 | 9.30E-01 | -1.24 | 8.92E-01 | -0.05 | 5.19E-01 |
| FLI1    | -1.48 | 9.30E-01 | -0.71 | 7.62E-01 | -1.91 | 9.72E-01 |
| NDUFV1  | -1.48 | 9.30E-01 | -1.47 | 9.29E-01 | -0.26 | 6.01E-01 |
| BCL9    | -1.48 | 9.30E-01 | -1.13 | 8.70E-01 | 0.96  | 1.68E-01 |
| TMEM53  | -1.48 | 9.30E-01 | 0.08  | 4.69E-01 | 0.11  | 4.56E-01 |
| OOSP2   | -1.48 | 9.30E-01 | -0.54 | 7.05E-01 | -0.94 | 8.25E-01 |
| GATAD1  | -1.48 | 9.30E-01 | -1.08 | 8.61E-01 | 0.50  | 3.10E-01 |
| ATP8B2  | -1.48 | 9.30E-01 | -0.33 | 6.28E-01 | 0.35  | 3.63E-01 |
| RHOD    | -1.48 | 9.30E-01 | -0.35 | 6.36E-01 | -0.58 | 7.20E-01 |
| NAE1    | -1.48 | 9.30E-01 | -0.54 | 7.05E-01 | 0.20  | 4.21E-01 |
| GALNT10 | -1.48 | 9.30E-01 | -0.06 | 5.23E-01 | 0.57  | 2.83E-01 |
| ITLN2   | -1.48 | 9.30E-01 | -1.30 | 9.04E-01 | -0.12 | 5.47E-01 |
| TGFB3   | -1.48 | 9.30E-01 | -1.61 | 9.46E-01 | -0.54 | 7.05E-01 |
| PEMT    | -1.48 | 9.31E-01 | 0.07  | 4.74E-01 | 0.33  | 3.71E-01 |
| RALY    | -1.48 | 9.31E-01 | 0.41  | 3.43E-01 | 0.63  | 2.65E-01 |
| VIPR1   | -1.48 | 9.31E-01 | -0.33 | 6.29E-01 | 1.31  | 9.52E-02 |
| ST8SIA5 | -1.48 | 9.31E-01 | -0.54 | 7.05E-01 | -1.39 | 9.18E-01 |
| MBD1    | -1.48 | 9.31E-01 | 0.43  | 3.32E-01 | 0.07  | 4.72E-01 |
| VWCE    | -1.48 | 9.31E-01 | -0.86 | 8.05E-01 | -0.82 | 7.95E-01 |
| HYKK    | -1.48 | 9.31E-01 | -0.58 | 7.19E-01 | 0.35  | 3.64E-01 |
| ZSCAN2  | -1.48 | 9.31E-01 | 0.40  | 3.45E-01 | 1.39  | 8.30E-02 |
| 43168   | -1.48 | 9.31E-01 | -1.36 | 9.14E-01 | -0.74 | 7.71E-01 |
| ACTB    | -1.48 | 9.31E-01 | -0.76 | 7.75E-01 | -1.69 | 9.55E-01 |
| ADNP2   | -1.48 | 9.31E-01 | -1.30 | 9.03E-01 | -0.19 | 5.75E-01 |
| PARVB   | -1.48 | 9.31E-01 | -1.19 | 8.82E-01 | -0.88 | 8.10E-01 |
| NPC1    | -1.48 | 9.31E-01 | -1.07 | 8.59E-01 | -0.67 | 7.48E-01 |
| ZNF528  | -1.48 | 9.31E-01 | -1.36 | 9.13E-01 | -0.89 | 8.12E-01 |

|              |       |          |       |          |       |          |
|--------------|-------|----------|-------|----------|-------|----------|
| TRNT1        | -1.48 | 9.31E-01 | -0.45 | 6.73E-01 | -0.44 | 6.71E-01 |
| OC90         | -1.48 | 9.31E-01 | -0.73 | 7.66E-01 | -0.42 | 6.63E-01 |
| GPR137       | -1.48 | 9.31E-01 | 0.19  | 4.26E-01 | -0.02 | 5.09E-01 |
| RIMBP2       | -1.49 | 9.31E-01 | -0.84 | 7.99E-01 | -0.14 | 5.54E-01 |
| WSCD1        | -1.49 | 9.31E-01 | -1.51 | 9.34E-01 | -1.12 | 8.68E-01 |
| GDPD1        | -1.49 | 9.32E-01 | -1.23 | 8.90E-01 | -0.30 | 6.18E-01 |
| AP4B1        | -1.49 | 9.32E-01 | -0.75 | 7.74E-01 | -1.23 | 8.91E-01 |
| HES4         | -1.49 | 9.32E-01 | -0.46 | 6.77E-01 | -0.39 | 6.53E-01 |
| LMCD1        | -1.49 | 9.32E-01 | 0.00  | 4.99E-01 | -0.37 | 6.43E-01 |
| BPHL         | -1.49 | 9.32E-01 | -1.62 | 9.47E-01 | -1.25 | 8.94E-01 |
| SRD5A3       | -1.49 | 9.32E-01 | -1.42 | 9.22E-01 | -1.28 | 9.00E-01 |
| SNW1         | -1.49 | 9.32E-01 | -1.57 | 9.42E-01 | -1.60 | 9.46E-01 |
| ALX3         | -1.49 | 9.32E-01 | 0.63  | 2.64E-01 | 0.55  | 2.91E-01 |
| LRPPRC       | -1.49 | 9.32E-01 | 0.46  | 3.24E-01 | 0.05  | 4.78E-01 |
| GSTP1        | -1.49 | 9.32E-01 | 0.08  | 4.66E-01 | 0.10  | 4.61E-01 |
| BBS9         | -1.49 | 9.32E-01 | -0.48 | 6.86E-01 | -0.49 | 6.88E-01 |
| OST4         | -1.49 | 9.32E-01 | -1.64 | 9.50E-01 | -1.20 | 8.85E-01 |
| TFAM         | -1.49 | 9.32E-01 | 1.78  | 3.76E-02 | 0.96  | 1.68E-01 |
| PRDX5        | -1.49 | 9.32E-01 | -0.12 | 5.49E-01 | 0.26  | 3.96E-01 |
| CMBL         | -1.49 | 9.32E-01 | -0.26 | 6.02E-01 | 1.26  | 1.04E-01 |
| ZNF703       | -1.49 | 9.32E-01 | 0.30  | 3.83E-01 | 0.26  | 3.97E-01 |
| ALX4         | -1.49 | 9.32E-01 | -1.41 | 9.20E-01 | -0.93 | 8.25E-01 |
| FAM214A      | -1.49 | 9.32E-01 | -1.18 | 8.81E-01 | 0.17  | 4.33E-01 |
| PRR5-ARHGAP8 | -1.49 | 9.32E-01 | -0.94 | 8.27E-01 | -1.41 | 9.21E-01 |
| GNB3         | -1.49 | 9.32E-01 | 0.07  | 4.73E-01 | 0.55  | 2.90E-01 |
| MED11        | -1.49 | 9.32E-01 | 0.34  | 3.67E-01 | 1.47  | 7.01E-02 |
| LRIG3        | -1.49 | 9.32E-01 | -1.50 | 9.33E-01 | -0.21 | 5.82E-01 |
| CYBA         | -1.49 | 9.32E-01 | -0.95 | 8.29E-01 | -1.56 | 9.40E-01 |
| RASGRP1      | -1.49 | 9.33E-01 | -1.02 | 8.47E-01 | -1.36 | 9.13E-01 |
| BRCA2        | -1.49 | 9.33E-01 | -1.87 | 9.69E-01 | -0.27 | 6.08E-01 |
| CHRM1        | -1.50 | 9.33E-01 | -1.61 | 9.46E-01 | -0.41 | 6.58E-01 |

|           |       |          |       |          |       |          |
|-----------|-------|----------|-------|----------|-------|----------|
| NDUFA11   | -1.50 | 9.33E-01 | -0.62 | 7.32E-01 | -1.77 | 9.61E-01 |
| GDPD4     | -1.50 | 9.33E-01 | -0.05 | 5.18E-01 | -0.75 | 7.74E-01 |
| CHIC2     | -1.50 | 9.33E-01 | 0.31  | 3.80E-01 | 0.94  | 1.73E-01 |
| PRPSAP2   | -1.50 | 9.33E-01 | -0.85 | 8.02E-01 | -0.32 | 6.27E-01 |
| PLEKHM2   | -1.50 | 9.33E-01 | -0.72 | 7.65E-01 | -1.25 | 8.94E-01 |
| CDS1      | -1.50 | 9.33E-01 | -1.65 | 9.51E-01 | -0.83 | 7.97E-01 |
| POLR3G    | -1.50 | 9.33E-01 | -0.74 | 7.71E-01 | -1.65 | 9.51E-01 |
| TMEM204   | -1.50 | 9.33E-01 | 0.04  | 4.86E-01 | 0.16  | 4.36E-01 |
| ADAP2     | -1.50 | 9.33E-01 | -0.45 | 6.74E-01 | -1.23 | 8.91E-01 |
| NANOGB    | -1.50 | 9.33E-01 | -1.38 | 9.15E-01 | -1.57 | 9.42E-01 |
| LMO2      | -1.50 | 9.33E-01 | -0.83 | 7.98E-01 | -0.74 | 7.70E-01 |
| C3orf80   | -1.50 | 9.33E-01 | -0.42 | 6.63E-01 | -0.06 | 5.26E-01 |
| PDE6B     | -1.50 | 9.34E-01 | -0.13 | 5.52E-01 | -0.30 | 6.18E-01 |
| NUAK2     | -1.50 | 9.34E-01 | -0.27 | 6.06E-01 | -1.63 | 9.48E-01 |
| TMPRSS11D | -1.50 | 9.34E-01 | -1.97 | 9.76E-01 | -1.44 | 9.26E-01 |
| IFT80     | -1.50 | 9.34E-01 | -1.70 | 9.55E-01 | -0.86 | 8.06E-01 |
| OIT3      | -1.51 | 9.34E-01 | -0.80 | 7.88E-01 | -1.22 | 8.89E-01 |
| SOD2      | -1.51 | 9.34E-01 | 0.24  | 4.04E-01 | -0.75 | 7.73E-01 |
| OTOGL     | -1.51 | 9.34E-01 | 0.45  | 3.27E-01 | -0.29 | 6.13E-01 |
| C17orf107 | -1.51 | 9.34E-01 | 0.47  | 3.21E-01 | 1.23  | 1.10E-01 |
| PACS2     | -1.51 | 9.34E-01 | 0.50  | 3.08E-01 | 0.73  | 2.33E-01 |
| KCNQ3     | -1.51 | 9.34E-01 | -1.12 | 8.68E-01 | -0.93 | 8.23E-01 |
| MINOS1    | -1.51 | 9.34E-01 | -0.31 | 6.22E-01 | -1.46 | 9.28E-01 |
| JDP2      | -1.51 | 9.34E-01 | -1.42 | 9.21E-01 | -1.09 | 8.63E-01 |
| RASAL3    | -1.51 | 9.34E-01 | -0.43 | 6.65E-01 | 0.74  | 2.30E-01 |
| DESI2     | -1.51 | 9.34E-01 | -0.70 | 7.58E-01 | -0.52 | 6.98E-01 |
| PLA2G12B  | -1.51 | 9.34E-01 | -0.55 | 7.08E-01 | -2.55 | 9.95E-01 |
| GPR124    | -1.51 | 9.34E-01 | 0.61  | 2.69E-01 | -0.70 | 7.59E-01 |
| MTFP1     | -1.51 | 9.34E-01 | -1.36 | 9.13E-01 | -0.56 | 7.13E-01 |
| MPI       | -1.51 | 9.35E-01 | -0.50 | 6.90E-01 | 0.11  | 4.57E-01 |
| HAUS3     | -1.51 | 9.35E-01 | 1.19  | 1.16E-01 | 1.26  | 1.04E-01 |

|          |       |          |       |          |       |          |
|----------|-------|----------|-------|----------|-------|----------|
| PDS5B    | -1.51 | 9.35E-01 | -1.56 | 9.40E-01 | -0.93 | 8.24E-01 |
| PGK2     | -1.51 | 9.35E-01 | -0.52 | 6.99E-01 | 0.06  | 4.74E-01 |
| ENPEP    | -1.51 | 9.35E-01 | -0.85 | 8.03E-01 | 0.30  | 3.81E-01 |
| C18orf8  | -1.51 | 9.35E-01 | -1.10 | 8.64E-01 | -0.52 | 7.00E-01 |
| CRYGN    | -1.52 | 9.35E-01 | 0.31  | 3.78E-01 | -0.50 | 6.90E-01 |
| CLPX     | -1.52 | 9.35E-01 | -0.27 | 6.08E-01 | -0.46 | 6.78E-01 |
| RUVBL2   | -1.52 | 9.35E-01 | -0.16 | 5.62E-01 | -0.47 | 6.82E-01 |
| UNCX     | -1.52 | 9.35E-01 | 0.33  | 3.71E-01 | 0.68  | 2.49E-01 |
| CPLX3    | -1.52 | 9.35E-01 | -1.38 | 9.17E-01 | -0.37 | 6.43E-01 |
| HSD17B12 | -1.52 | 9.35E-01 | -1.68 | 9.54E-01 | -0.54 | 7.05E-01 |
| CCDC147  | -1.52 | 9.35E-01 | -1.56 | 9.40E-01 | -1.17 | 8.78E-01 |
| PIP4K2C  | -1.52 | 9.35E-01 | -0.60 | 7.27E-01 | -1.36 | 9.14E-01 |
| GEMIN5   | -1.52 | 9.35E-01 | 0.72  | 2.36E-01 | 1.19  | 1.18E-01 |
| VMAC     | -1.52 | 9.35E-01 | -0.63 | 7.35E-01 | -0.94 | 8.28E-01 |
| PSG8     | -1.52 | 9.36E-01 | -1.05 | 8.53E-01 | -0.92 | 8.22E-01 |
| ANKRD49  | -1.52 | 9.36E-01 | -0.63 | 7.36E-01 | -0.07 | 5.26E-01 |
| TSPAN16  | -1.52 | 9.36E-01 | -1.19 | 8.83E-01 | -1.45 | 9.26E-01 |
| AGXT     | -1.52 | 9.36E-01 | 0.38  | 3.52E-01 | 1.26  | 1.04E-01 |
| LIPA     | -1.52 | 9.36E-01 | -0.51 | 6.95E-01 | 0.19  | 4.25E-01 |
| ADAD2    | -1.52 | 9.36E-01 | 1.93  | 2.67E-02 | 0.76  | 2.22E-01 |
| SLC16A8  | -1.52 | 9.36E-01 | -0.57 | 7.15E-01 | -0.06 | 5.22E-01 |
| CD300A   | -1.52 | 9.36E-01 | 0.99  | 1.60E-01 | 0.27  | 3.92E-01 |
| FBP2     | -1.52 | 9.36E-01 | -0.36 | 6.40E-01 | -1.37 | 9.15E-01 |
| OLFML1   | -1.52 | 9.36E-01 | 0.11  | 4.56E-01 | -0.15 | 5.61E-01 |
| KRTAP1-4 | -1.52 | 9.36E-01 | -0.69 | 7.55E-01 | -0.51 | 6.95E-01 |
| HIATL2   | -1.52 | 9.36E-01 | -1.23 | 8.91E-01 | -2.17 | 9.85E-01 |
| SASH1    | -1.53 | 9.37E-01 | -0.67 | 7.48E-01 | -0.87 | 8.09E-01 |
| ATP5C1   | -1.53 | 9.37E-01 | -1.04 | 8.51E-01 | -1.19 | 8.83E-01 |
| MRO      | -1.53 | 9.37E-01 | -1.27 | 8.98E-01 | -0.31 | 6.21E-01 |
| FBXO21   | -1.53 | 9.37E-01 | -0.11 | 5.42E-01 | -0.46 | 6.76E-01 |
| E2F3     | -1.53 | 9.37E-01 | -2.07 | 9.81E-01 | -1.39 | 9.18E-01 |



|          |       |          |       |          |       |          |
|----------|-------|----------|-------|----------|-------|----------|
| PBLD     | -1.53 | 9.37E-01 | 0.77  | 2.21E-01 | 0.47  | 3.20E-01 |
| EDARADD  | -1.53 | 9.37E-01 | -1.42 | 9.22E-01 | -0.62 | 7.31E-01 |
| FBXO18   | -1.53 | 9.37E-01 | -0.65 | 7.42E-01 | -0.23 | 5.92E-01 |
| INTS3    | -1.53 | 9.37E-01 | 0.22  | 4.13E-01 | 0.92  | 1.78E-01 |
| SOGA3    | -1.53 | 9.37E-01 | -1.47 | 9.29E-01 | -0.07 | 5.29E-01 |
| SOGA3    | -1.53 | 9.37E-01 | -1.47 | 9.29E-01 | -0.07 | 5.29E-01 |
| GJA9     | -1.53 | 9.37E-01 | -0.51 | 6.95E-01 | 0.16  | 4.35E-01 |
| TOPORS   | -1.53 | 9.37E-01 | -2.01 | 9.78E-01 | -0.77 | 7.80E-01 |
| FRAT2    | -1.53 | 9.37E-01 | -0.06 | 5.22E-01 | 0.03  | 4.88E-01 |
| CDK1     | -1.53 | 9.37E-01 | -0.18 | 5.72E-01 | -0.21 | 5.82E-01 |
| DENR     | -1.53 | 9.38E-01 | -0.92 | 8.22E-01 | 0.01  | 4.98E-01 |
| TLE4     | -1.54 | 9.38E-01 | 0.06  | 4.76E-01 | -0.24 | 5.93E-01 |
| TSHZ1    | -1.54 | 9.38E-01 | -0.83 | 7.96E-01 | -0.47 | 6.82E-01 |
| CLDN24   | -1.54 | 9.38E-01 | -1.20 | 8.85E-01 | -0.73 | 7.68E-01 |
| WTAP     | -1.54 | 9.38E-01 | 0.19  | 4.23E-01 | -0.49 | 6.88E-01 |
| SRGAP3   | -1.54 | 9.38E-01 | -0.84 | 7.98E-01 | 0.03  | 4.88E-01 |
| UBA6     | -1.54 | 9.38E-01 | -0.43 | 6.67E-01 | -1.02 | 8.46E-01 |
| KIF4B    | -1.54 | 9.38E-01 | 0.11  | 4.55E-01 | 0.81  | 2.09E-01 |
| SNX2     | -1.54 | 9.38E-01 | -0.12 | 5.46E-01 | -1.04 | 8.51E-01 |
| BCL3     | -1.54 | 9.38E-01 | 0.88  | 1.90E-01 | 0.88  | 1.89E-01 |
| PCDHB2   | -1.54 | 9.38E-01 | -0.35 | 6.38E-01 | -0.43 | 6.66E-01 |
| CNBD1    | -1.55 | 9.39E-01 | -1.87 | 9.69E-01 | -1.65 | 9.50E-01 |
| MAFA     | -1.55 | 9.39E-01 | -0.92 | 8.23E-01 | -0.32 | 6.24E-01 |
| SPEM1    | -1.55 | 9.39E-01 | -1.64 | 9.49E-01 | -0.96 | 8.32E-01 |
| CHAF1B   | -1.55 | 9.39E-01 | -0.97 | 8.34E-01 | -0.93 | 8.23E-01 |
| USP35    | -1.55 | 9.39E-01 | -1.19 | 8.83E-01 | -0.85 | 8.01E-01 |
| DPF2     | -1.55 | 9.39E-01 | 0.98  | 1.65E-01 | -0.25 | 5.98E-01 |
| TGFBRAP1 | -1.55 | 9.39E-01 | 0.17  | 4.34E-01 | -1.20 | 8.85E-01 |
| UBE2S    | -1.55 | 9.39E-01 | 0.17  | 4.34E-01 | -0.43 | 6.66E-01 |
| TTLL9    | -1.55 | 9.39E-01 | -1.03 | 8.48E-01 | -1.18 | 8.82E-01 |
| ADRB2    | -1.55 | 9.39E-01 | -0.67 | 7.48E-01 | -0.01 | 5.02E-01 |

|             |       |          |       |          |       |          |
|-------------|-------|----------|-------|----------|-------|----------|
| SLC31A1     | -1.55 | 9.39E-01 | 0.04  | 4.85E-01 | 1.80  | 3.58E-02 |
| C2orf49     | -1.55 | 9.39E-01 | 0.71  | 2.39E-01 | 0.10  | 4.62E-01 |
| KCNN4       | -1.55 | 9.39E-01 | -2.49 | 9.94E-01 | -0.75 | 7.72E-01 |
| PCDHAC2     | -1.55 | 9.39E-01 | -1.23 | 8.90E-01 | -1.28 | 9.00E-01 |
| E2F7        | -1.55 | 9.40E-01 | -2.08 | 9.81E-01 | -0.23 | 5.90E-01 |
| OC90        | -1.55 | 9.40E-01 | -0.95 | 8.28E-01 | -0.60 | 7.26E-01 |
| MFSD2A      | -1.55 | 9.40E-01 | -1.12 | 8.69E-01 | -1.27 | 8.97E-01 |
| SEC24A      | -1.55 | 9.40E-01 | -1.80 | 9.64E-01 | -1.12 | 8.68E-01 |
| MBOAT4      | -1.55 | 9.40E-01 | -0.37 | 6.44E-01 | -0.75 | 7.72E-01 |
| AP003068.23 | -1.55 | 9.40E-01 | 0.01  | 4.94E-01 | -0.16 | 5.65E-01 |
| TIAM1       | -1.55 | 9.40E-01 | -1.06 | 8.56E-01 | -1.22 | 8.89E-01 |
| GSAP        | -1.56 | 9.40E-01 | -1.27 | 8.99E-01 | -0.10 | 5.38E-01 |
| VPS37A      | -1.56 | 9.40E-01 | 0.43  | 3.35E-01 | -0.35 | 6.38E-01 |
| GLP1R       | -1.56 | 9.40E-01 | -0.90 | 8.16E-01 | -1.86 | 9.68E-01 |
| PPP1R14B    | -1.56 | 9.40E-01 | 0.99  | 1.62E-01 | 1.21  | 1.13E-01 |
| DNAJC5      | -1.56 | 9.40E-01 | -1.36 | 9.13E-01 | -0.63 | 7.37E-01 |
| PCGF3       | -1.56 | 9.40E-01 | -0.35 | 6.37E-01 | -0.40 | 6.54E-01 |
| SEC13       | -1.56 | 9.40E-01 | -0.23 | 5.91E-01 | -0.97 | 8.35E-01 |
| TRIP4       | -1.56 | 9.40E-01 | -0.76 | 7.77E-01 | -0.41 | 6.58E-01 |
| LIP1        | -1.56 | 9.40E-01 | -0.91 | 8.19E-01 | -1.11 | 8.66E-01 |
| SSBP2       | -1.56 | 9.41E-01 | -0.46 | 6.77E-01 | -1.86 | 9.69E-01 |
| EFCAB4B     | -1.56 | 9.41E-01 | 0.66  | 2.53E-01 | -0.14 | 5.54E-01 |
| CCDC175     | -1.56 | 9.41E-01 | -2.18 | 9.85E-01 | -1.02 | 8.47E-01 |
| FTCDNL1     | -1.56 | 9.41E-01 | -0.41 | 6.58E-01 | -0.50 | 6.90E-01 |
| PYGO2       | -1.56 | 9.41E-01 | -0.04 | 5.17E-01 | -0.76 | 7.75E-01 |
| PIK3C3      | -1.56 | 9.41E-01 | -1.53 | 9.37E-01 | -0.11 | 5.42E-01 |
| HAUS6       | -1.56 | 9.41E-01 | -1.23 | 8.90E-01 | -0.92 | 8.21E-01 |
| STK32B      | -1.56 | 9.41E-01 | 0.20  | 4.22E-01 | 0.60  | 2.75E-01 |
| DUSP7       | -1.56 | 9.41E-01 | -1.28 | 8.99E-01 | -0.34 | 6.33E-01 |
| SQSTM1      | -1.57 | 9.41E-01 | -0.80 | 7.90E-01 | -1.40 | 9.19E-01 |
| BMP6        | -1.57 | 9.41E-01 | -1.22 | 8.89E-01 | -1.09 | 8.63E-01 |

|           |       |          |       |          |       |          |
|-----------|-------|----------|-------|----------|-------|----------|
| DOPEY2    | -1.57 | 9.41E-01 | -0.85 | 8.02E-01 | -1.13 | 8.70E-01 |
| ALPP      | -1.57 | 9.41E-01 | -0.27 | 6.06E-01 | 0.42  | 3.36E-01 |
| PRMT2     | -1.57 | 9.42E-01 | -0.44 | 6.70E-01 | -1.07 | 8.58E-01 |
| ADAMTS10  | -1.57 | 9.42E-01 | -0.41 | 6.59E-01 | -0.13 | 5.52E-01 |
| C14orf178 | -1.57 | 9.42E-01 | -1.64 | 9.50E-01 | -1.66 | 9.51E-01 |
| GNPTG     | -1.57 | 9.42E-01 | -1.21 | 8.87E-01 | -1.32 | 9.07E-01 |
| TET1      | -1.57 | 9.42E-01 | -1.69 | 9.55E-01 | -1.04 | 8.51E-01 |
| ASF1B     | -1.57 | 9.42E-01 | -1.19 | 8.82E-01 | -1.10 | 8.64E-01 |
| TEFM      | -1.57 | 9.42E-01 | -0.82 | 7.93E-01 | -1.51 | 9.34E-01 |
| PTPN2     | -1.57 | 9.42E-01 | -1.07 | 8.58E-01 | -0.84 | 7.99E-01 |
| AHCYL2    | -1.57 | 9.42E-01 | -0.46 | 6.76E-01 | 0.47  | 3.20E-01 |
| TMED7     | -1.57 | 9.42E-01 | -0.39 | 6.50E-01 | -1.43 | 9.24E-01 |
| HJURP     | -1.57 | 9.42E-01 | -0.93 | 8.23E-01 | -0.13 | 5.53E-01 |
| IL21      | -1.57 | 9.42E-01 | -0.54 | 7.05E-01 | 0.02  | 4.94E-01 |
| POLN      | -1.57 | 9.42E-01 | 0.52  | 3.01E-01 | 0.71  | 2.39E-01 |
| MTR       | -1.57 | 9.42E-01 | -0.58 | 7.17E-01 | 0.14  | 4.43E-01 |
| MYCBP     | -1.58 | 9.42E-01 | -0.56 | 7.13E-01 | 0.13  | 4.48E-01 |
| SNX30     | -1.58 | 9.42E-01 | -1.06 | 8.56E-01 | -2.41 | 9.92E-01 |
| CRLF3     | -1.58 | 9.43E-01 | 0.08  | 4.67E-01 | 0.35  | 3.65E-01 |
| C1orf172  | -1.58 | 9.43E-01 | 0.01  | 4.96E-01 | 1.12  | 1.31E-01 |
| RASA3     | -1.58 | 9.43E-01 | -1.48 | 9.31E-01 | -0.86 | 8.06E-01 |
| PLA2G2E   | -1.58 | 9.43E-01 | -0.48 | 6.85E-01 | 0.07  | 4.73E-01 |
| PALM      | -1.58 | 9.43E-01 | 0.17  | 4.31E-01 | -0.63 | 7.34E-01 |
| ALG10B    | -1.58 | 9.43E-01 | -0.52 | 6.97E-01 | 0.41  | 3.40E-01 |
| DESI1     | -1.58 | 9.43E-01 | -1.72 | 9.58E-01 | -1.07 | 8.57E-01 |
| SIRPD     | -1.58 | 9.43E-01 | -1.62 | 9.47E-01 | -0.81 | 7.91E-01 |
| LGALS3BP  | -1.58 | 9.43E-01 | -0.90 | 8.16E-01 | -0.64 | 7.38E-01 |
| CCDC112   | -1.58 | 9.43E-01 | 0.05  | 4.81E-01 | -1.28 | 9.00E-01 |
| PHPT1     | -1.58 | 9.43E-01 | 0.03  | 4.89E-01 | -0.08 | 5.31E-01 |
| GRIP1     | -1.58 | 9.43E-01 | -0.78 | 7.82E-01 | -0.64 | 7.39E-01 |
| ATAD5     | -1.58 | 9.43E-01 | -1.04 | 8.50E-01 | -1.69 | 9.55E-01 |

|            |       |          |       |          |       |          |
|------------|-------|----------|-------|----------|-------|----------|
| STK17A     | -1.58 | 9.43E-01 | -0.90 | 8.17E-01 | -1.71 | 9.57E-01 |
| AC016757.3 | -1.58 | 9.43E-01 | -0.66 | 7.45E-01 | -0.19 | 5.75E-01 |
| WBSCR27    | -1.58 | 9.43E-01 | -0.97 | 8.35E-01 | -0.44 | 6.70E-01 |
| PRSS55     | -1.59 | 9.44E-01 | -0.01 | 5.05E-01 | 0.92  | 1.78E-01 |
| KLHDC8A    | -1.59 | 9.44E-01 | 0.18  | 4.29E-01 | -0.62 | 7.33E-01 |
| GTF2F1     | -1.59 | 9.44E-01 | -1.44 | 9.25E-01 | -1.34 | 9.09E-01 |
| GPR150     | -1.59 | 9.44E-01 | 1.48  | 6.88E-02 | 1.37  | 8.49E-02 |
| ACTA2      | -1.59 | 9.44E-01 | -1.40 | 9.19E-01 | -1.11 | 8.66E-01 |
| PPP1R26    | -1.59 | 9.44E-01 | -0.21 | 5.83E-01 | -0.76 | 7.75E-01 |
| HAPLN1     | -1.59 | 9.44E-01 | -1.73 | 9.58E-01 | -0.97 | 8.35E-01 |
| TXNDC16    | -1.59 | 9.44E-01 | 0.79  | 2.14E-01 | 0.77  | 2.20E-01 |
| METTL17    | -1.59 | 9.44E-01 | -1.28 | 9.00E-01 | -0.17 | 5.67E-01 |
| LAMC2      | -1.59 | 9.44E-01 | 0.11  | 4.56E-01 | -0.36 | 6.42E-01 |
| MEDAG      | -1.59 | 9.44E-01 | -0.92 | 8.21E-01 | -1.54 | 9.38E-01 |
| AEBP1      | -1.59 | 9.44E-01 | -0.31 | 6.23E-01 | -0.47 | 6.80E-01 |
| MRPL48     | -1.59 | 9.44E-01 | -0.88 | 8.10E-01 | -0.55 | 7.08E-01 |
| AKAP13     | -1.59 | 9.44E-01 | -1.08 | 8.59E-01 | -0.22 | 5.86E-01 |
| RPS15A     | -1.59 | 9.44E-01 | -1.74 | 9.59E-01 | -1.13 | 8.71E-01 |
| BEST1      | -1.59 | 9.44E-01 | -0.72 | 7.63E-01 | 0.25  | 4.01E-01 |
| C5orf24    | -1.59 | 9.44E-01 | -1.00 | 8.42E-01 | -1.08 | 8.59E-01 |
| KRT72      | -1.59 | 9.44E-01 | -0.33 | 6.27E-01 | -0.93 | 8.25E-01 |
| CDC16      | -1.59 | 9.44E-01 | 0.05  | 4.80E-01 | -0.83 | 7.96E-01 |
| PARVG      | -1.59 | 9.44E-01 | -1.05 | 8.53E-01 | -1.64 | 9.49E-01 |
| C17orf53   | -1.59 | 9.44E-01 | -1.01 | 8.43E-01 | -2.58 | 9.95E-01 |
| RPGRIP1L   | -1.59 | 9.45E-01 | -1.47 | 9.30E-01 | -1.31 | 9.06E-01 |
| ZNF317     | -1.59 | 9.45E-01 | -0.12 | 5.47E-01 | -1.31 | 9.06E-01 |
| PHOX2A     | -1.60 | 9.45E-01 | -0.04 | 5.16E-01 | 0.43  | 3.32E-01 |
| C15orf54   | -1.60 | 9.45E-01 | 1.09  | 1.37E-01 | 0.95  | 1.72E-01 |
| HSPB3      | -1.60 | 9.45E-01 | 0.58  | 2.80E-01 | 0.86  | 1.94E-01 |
| TMEM92     | -1.60 | 9.45E-01 | -1.22 | 8.88E-01 | -0.54 | 7.04E-01 |
| GLYATL2    | -1.60 | 9.45E-01 | 1.52  | 6.37E-02 | 1.50  | 6.74E-02 |

|         |       |          |       |          |       |          |
|---------|-------|----------|-------|----------|-------|----------|
| UBXN4   | -1.60 | 9.45E-01 | -1.80 | 9.64E-01 | -1.06 | 8.57E-01 |
| HSBP1L1 | -1.60 | 9.45E-01 | -1.19 | 8.83E-01 | -0.67 | 7.49E-01 |
| OR51I2  | -1.60 | 9.45E-01 | -0.82 | 7.94E-01 | -1.14 | 8.72E-01 |
| TTC40   | -1.60 | 9.45E-01 | -0.03 | 5.13E-01 | -0.41 | 6.57E-01 |
| AGPS    | -1.60 | 9.45E-01 | 0.21  | 4.16E-01 | 0.44  | 3.30E-01 |
| PLEKHN1 | -1.60 | 9.45E-01 | -1.40 | 9.19E-01 | -1.84 | 9.67E-01 |
| MMP25   | -1.60 | 9.46E-01 | -0.41 | 6.59E-01 | 0.00  | 5.00E-01 |
| VMP1    | -1.60 | 9.46E-01 | -0.43 | 6.66E-01 | -1.79 | 9.63E-01 |
| PLD4    | -1.61 | 9.46E-01 | -0.94 | 8.27E-01 | -1.18 | 8.82E-01 |
| CUEDC1  | -1.61 | 9.46E-01 | -0.35 | 6.38E-01 | -0.79 | 7.85E-01 |
| ABLIM1  | -1.61 | 9.46E-01 | -1.21 | 8.88E-01 | -0.01 | 5.04E-01 |
| BRF2    | -1.61 | 9.46E-01 | -0.60 | 7.27E-01 | 0.01  | 4.97E-01 |
| SPZ1    | -1.61 | 9.46E-01 | -0.74 | 7.71E-01 | -0.73 | 7.68E-01 |
| CLECL1  | -1.61 | 9.46E-01 | -0.78 | 7.81E-01 | 0.75  | 2.27E-01 |
| F5      | -1.61 | 9.46E-01 | 0.21  | 4.18E-01 | 0.30  | 3.81E-01 |
| PXMP2   | -1.61 | 9.46E-01 | -1.08 | 8.61E-01 | -0.71 | 7.62E-01 |
| DPYS    | -1.61 | 9.46E-01 | -1.25 | 8.95E-01 | 0.88  | 1.89E-01 |
| AIRE    | -1.61 | 9.46E-01 | -0.76 | 7.77E-01 | -1.45 | 9.26E-01 |
| FHL2    | -1.61 | 9.47E-01 | -0.44 | 6.69E-01 | -0.93 | 8.25E-01 |
| CCDC88B | -1.61 | 9.47E-01 | 0.22  | 4.14E-01 | 0.61  | 2.70E-01 |
| EFCAB5  | -1.61 | 9.47E-01 | -1.36 | 9.13E-01 | -1.44 | 9.24E-01 |
| RPS9    | -1.61 | 9.47E-01 | -0.75 | 7.73E-01 | 0.16  | 4.36E-01 |
| MLLT3   | -1.61 | 9.47E-01 | -1.00 | 8.41E-01 | -1.78 | 9.62E-01 |
| STOML2  | -1.61 | 9.47E-01 | 0.29  | 3.86E-01 | 0.66  | 2.54E-01 |
| MEIS1   | -1.62 | 9.47E-01 | -0.91 | 8.19E-01 | -0.45 | 6.75E-01 |
| RNF14   | -1.62 | 9.47E-01 | -1.25 | 8.95E-01 | -0.73 | 7.68E-01 |
| IMP3    | -1.62 | 9.47E-01 | -1.00 | 8.41E-01 | -0.90 | 8.15E-01 |
| RCN2    | -1.62 | 9.47E-01 | -0.35 | 6.38E-01 | -0.93 | 8.24E-01 |
| FNDC8   | -1.62 | 9.47E-01 | -1.74 | 9.59E-01 | -1.30 | 9.03E-01 |
| MAN2A1  | -1.62 | 9.47E-01 | -0.71 | 7.61E-01 | 0.46  | 3.21E-01 |
| ITGB2   | -1.62 | 9.47E-01 | -0.62 | 7.33E-01 | -1.35 | 9.11E-01 |

|                |       |          |       |          |       |          |
|----------------|-------|----------|-------|----------|-------|----------|
| GIMAP7         | -1.62 | 9.47E-01 | -0.26 | 6.02E-01 | -1.18 | 8.81E-01 |
| ATP1A2         | -1.62 | 9.48E-01 | -2.27 | 9.88E-01 | -0.13 | 5.51E-01 |
| C20orf197      | -1.62 | 9.48E-01 | -1.49 | 9.31E-01 | -1.06 | 8.55E-01 |
| CYP51A1        | -1.62 | 9.48E-01 | -0.71 | 7.63E-01 | -0.49 | 6.88E-01 |
| XRCC6BP1       | -1.62 | 9.48E-01 | -2.47 | 9.93E-01 | -1.29 | 9.02E-01 |
| SNTB1          | -1.63 | 9.48E-01 | -0.43 | 6.67E-01 | -0.62 | 7.32E-01 |
| IER5L          | -1.63 | 9.48E-01 | -0.33 | 6.29E-01 | -0.32 | 6.26E-01 |
| FTO            | -1.63 | 9.48E-01 | 1.11  | 1.34E-01 | 2.72  | 3.29E-03 |
| DCHS2          | -1.63 | 9.48E-01 | -0.36 | 6.39E-01 | -1.56 | 9.40E-01 |
| MORC3          | -1.63 | 9.48E-01 | -1.40 | 9.20E-01 | -1.16 | 8.77E-01 |
| SLC1A1         | -1.63 | 9.48E-01 | -0.58 | 7.20E-01 | -0.82 | 7.93E-01 |
| PSMB1          | -1.63 | 9.48E-01 | -0.53 | 7.03E-01 | 0.27  | 3.95E-01 |
| TBCE           | -1.63 | 9.49E-01 | -1.64 | 9.50E-01 | -0.87 | 8.09E-01 |
| RER1           | -1.63 | 9.49E-01 | -0.32 | 6.26E-01 | -0.01 | 5.04E-01 |
| RIN2           | -1.63 | 9.49E-01 | -1.05 | 8.52E-01 | -0.35 | 6.38E-01 |
| SHC1           | -1.63 | 9.49E-01 | -0.20 | 5.79E-01 | -0.10 | 5.39E-01 |
| TTLL5          | -1.63 | 9.49E-01 | -2.16 | 9.85E-01 | -1.37 | 9.15E-01 |
| USP33          | -1.63 | 9.49E-01 | -0.44 | 6.69E-01 | 0.05  | 4.80E-01 |
| MAPRE1         | -1.64 | 9.49E-01 | -1.02 | 8.46E-01 | -0.38 | 6.48E-01 |
| CLEC4C         | -1.64 | 9.49E-01 | -2.16 | 9.85E-01 | -0.41 | 6.59E-01 |
| U2AF2          | -1.64 | 9.49E-01 | -1.05 | 8.52E-01 | -1.57 | 9.42E-01 |
| OSBPL1A        | -1.64 | 9.49E-01 | -2.66 | 9.96E-01 | -0.49 | 6.88E-01 |
| OLR1           | -1.64 | 9.49E-01 | -0.19 | 5.74E-01 | -0.61 | 7.28E-01 |
| GREM2          | -1.64 | 9.49E-01 | -0.33 | 6.30E-01 | -0.68 | 7.52E-01 |
| ZNF181         | -1.64 | 9.49E-01 | -1.04 | 8.50E-01 | -0.25 | 6.00E-01 |
| PSTK           | -1.64 | 9.49E-01 | -0.46 | 6.79E-01 | -1.04 | 8.50E-01 |
| TMEM251        | -1.64 | 9.49E-01 | -0.63 | 7.34E-01 | -0.48 | 6.86E-01 |
| NDUFA8         | -1.64 | 9.49E-01 | -0.96 | 8.32E-01 | -0.27 | 6.07E-01 |
| APOBEC4        | -1.64 | 9.50E-01 | -0.81 | 7.90E-01 | -0.94 | 8.27E-01 |
| PDCD5          | -1.64 | 9.50E-01 | -1.04 | 8.51E-01 | -3.06 | 9.99E-01 |
| TMEM256-PLSCR3 | -1.64 | 9.50E-01 | -1.01 | 8.43E-01 | -1.04 | 8.50E-01 |

|                 |       |          |       |          |       |          |
|-----------------|-------|----------|-------|----------|-------|----------|
| C17orf61-PLSCR3 | -1.64 | 9.50E-01 | -1.01 | 8.43E-01 | -1.04 | 8.50E-01 |
| SMPDL3A         | -1.65 | 9.50E-01 | -0.17 | 5.67E-01 | -0.93 | 8.25E-01 |
| DNAJB13         | -1.65 | 9.50E-01 | -1.60 | 9.45E-01 | 0.41  | 3.42E-01 |
| ZFPL1           | -1.65 | 9.50E-01 | 1.04  | 1.48E-01 | 1.01  | 1.56E-01 |
| ACSL3           | -1.65 | 9.50E-01 | -1.62 | 9.48E-01 | 0.02  | 4.91E-01 |
| VEGFB           | -1.65 | 9.50E-01 | -0.61 | 7.29E-01 | -0.27 | 6.08E-01 |
| ZNF562          | -1.65 | 9.50E-01 | -1.09 | 8.62E-01 | -0.43 | 6.66E-01 |
| DTX3            | -1.65 | 9.50E-01 | -1.05 | 8.54E-01 | -2.06 | 9.80E-01 |
| C2orf83         | -1.65 | 9.51E-01 | -1.67 | 9.53E-01 | -0.28 | 6.09E-01 |
| C14orf166       | -1.65 | 9.51E-01 | -0.61 | 7.27E-01 | 0.21  | 4.16E-01 |
| LCT             | -1.65 | 9.51E-01 | -1.87 | 9.70E-01 | -1.37 | 9.15E-01 |
| C15orf27        | -1.65 | 9.51E-01 | -1.15 | 8.75E-01 | -2.50 | 9.94E-01 |
| TSPEAR          | -1.65 | 9.51E-01 | -0.56 | 7.11E-01 | -0.17 | 5.69E-01 |
| KCNK5           | -1.65 | 9.51E-01 | -0.82 | 7.95E-01 | 0.07  | 4.72E-01 |
| RPL23A          | -1.65 | 9.51E-01 | -1.27 | 8.98E-01 | -1.67 | 9.52E-01 |
| SLC44A3         | -1.65 | 9.51E-01 | 0.03  | 4.87E-01 | -0.25 | 5.99E-01 |
| SLC6A4          | -1.65 | 9.51E-01 | -2.07 | 9.81E-01 | -1.36 | 9.13E-01 |
| KBTBD8          | -1.65 | 9.51E-01 | -0.71 | 7.60E-01 | -1.26 | 8.96E-01 |
| PTPRR           | -1.65 | 9.51E-01 | -1.21 | 8.86E-01 | -1.10 | 8.64E-01 |
| DNAJB4          | -1.65 | 9.51E-01 | -0.84 | 8.01E-01 | 0.46  | 3.24E-01 |
| DAZL            | -1.66 | 9.51E-01 | -0.94 | 8.27E-01 | -1.09 | 8.62E-01 |
| ZNF846          | -1.66 | 9.51E-01 | -1.17 | 8.80E-01 | -0.59 | 7.21E-01 |
| MINK1           | -1.66 | 9.51E-01 | 0.85  | 1.97E-01 | 1.35  | 8.85E-02 |
| SNAP25          | -1.66 | 9.51E-01 | -0.18 | 5.71E-01 | -0.09 | 5.34E-01 |
| MAP4K3          | -1.66 | 9.51E-01 | -1.84 | 9.67E-01 | -0.62 | 7.33E-01 |
| SPERT           | -1.66 | 9.52E-01 | -1.47 | 9.29E-01 | -0.62 | 7.32E-01 |
| TRIM33          | -1.66 | 9.52E-01 | -1.53 | 9.37E-01 | -0.30 | 6.16E-01 |
| CAMK2N2         | -1.66 | 9.52E-01 | -1.14 | 8.72E-01 | -0.79 | 7.86E-01 |
| PPP4R2          | -1.67 | 9.52E-01 | -0.30 | 6.20E-01 | -0.25 | 5.99E-01 |
| TNFRSF12A       | -1.67 | 9.52E-01 | -1.03 | 8.48E-01 | -1.69 | 9.55E-01 |
| CGB1            | -1.67 | 9.52E-01 | -0.70 | 7.57E-01 | -0.82 | 7.94E-01 |

|              |       |          |       |          |       |          |
|--------------|-------|----------|-------|----------|-------|----------|
| SLC6A11      | -1.67 | 9.52E-01 | -1.64 | 9.49E-01 | -0.17 | 5.67E-01 |
| SLC35G3      | -1.67 | 9.52E-01 | -0.60 | 7.24E-01 | -0.14 | 5.56E-01 |
| CDH26        | -1.67 | 9.52E-01 | -0.15 | 5.58E-01 | 0.11  | 4.57E-01 |
| GCNT4        | -1.67 | 9.53E-01 | -0.43 | 6.66E-01 | -0.65 | 7.41E-01 |
| GJA5         | -1.67 | 9.53E-01 | -0.80 | 7.88E-01 | 0.02  | 4.94E-01 |
| GLYATL1      | -1.67 | 9.53E-01 | -0.25 | 5.98E-01 | -0.43 | 6.68E-01 |
| PCSK4        | -1.67 | 9.53E-01 | -1.49 | 9.32E-01 | -2.36 | 9.91E-01 |
| NFE2L2       | -1.68 | 9.53E-01 | 0.05  | 4.78E-01 | 0.72  | 2.36E-01 |
| TRMT10C      | -1.68 | 9.53E-01 | -1.20 | 8.85E-01 | -1.07 | 8.58E-01 |
| AMBN         | -1.68 | 9.53E-01 | -1.51 | 9.34E-01 | -1.30 | 9.04E-01 |
| SLC25A25     | -1.68 | 9.53E-01 | -0.84 | 7.98E-01 | -1.54 | 9.38E-01 |
| BECN1        | -1.68 | 9.53E-01 | -1.64 | 9.49E-01 | -0.83 | 7.97E-01 |
| HCFC1R1      | -1.68 | 9.53E-01 | -0.78 | 7.82E-01 | -2.34 | 9.90E-01 |
| TMC1         | -1.68 | 9.54E-01 | -0.07 | 5.28E-01 | 0.48  | 3.14E-01 |
| ZNF57        | -1.68 | 9.54E-01 | 1.43  | 7.58E-02 | 1.82  | 3.44E-02 |
| TSC1         | -1.68 | 9.54E-01 | -1.16 | 8.76E-01 | 0.11  | 4.54E-01 |
| ING5         | -1.68 | 9.54E-01 | -0.49 | 6.89E-01 | 0.14  | 4.45E-01 |
| STX16-NPEPL1 | -1.69 | 9.54E-01 | -0.03 | 5.10E-01 | 0.26  | 3.97E-01 |
| PLEKHG4B     | -1.69 | 9.54E-01 | -1.70 | 9.55E-01 | -0.95 | 8.30E-01 |
| MRPL22       | -1.69 | 9.54E-01 | 0.55  | 2.93E-01 | 1.20  | 1.15E-01 |
| NUP205       | -1.69 | 9.54E-01 | -1.86 | 9.68E-01 | -1.63 | 9.49E-01 |
| ULK3         | -1.69 | 9.55E-01 | -1.30 | 9.02E-01 | -0.86 | 8.04E-01 |
| FLVCR2       | -1.69 | 9.55E-01 | -2.29 | 9.89E-01 | -0.59 | 7.21E-01 |
| CDAN1        | -1.70 | 9.55E-01 | -1.36 | 9.13E-01 | -1.67 | 9.53E-01 |
| ZC3HAV1      | -1.70 | 9.55E-01 | -0.86 | 8.04E-01 | 0.26  | 3.98E-01 |
| PTDSS1       | -1.70 | 9.55E-01 | 0.49  | 3.10E-01 | 0.19  | 4.26E-01 |
| C14orf164    | -1.70 | 9.55E-01 | -0.84 | 8.00E-01 | -0.69 | 7.56E-01 |
| PAAF1        | -1.70 | 9.55E-01 | -1.39 | 9.18E-01 | -0.23 | 5.89E-01 |
| AQP6         | -1.70 | 9.55E-01 | -1.37 | 9.15E-01 | -2.04 | 9.79E-01 |
| GLTSCR2      | -1.70 | 9.56E-01 | 0.09  | 4.64E-01 | -0.57 | 7.15E-01 |
| TEX26        | -1.70 | 9.56E-01 | -1.85 | 9.68E-01 | -2.29 | 9.89E-01 |



|          |       |          |       |          |       |          |
|----------|-------|----------|-------|----------|-------|----------|
| PCED1B   | -1.70 | 9.56E-01 | -1.31 | 9.04E-01 | -0.70 | 7.57E-01 |
| FLAD1    | -1.70 | 9.56E-01 | -0.54 | 7.06E-01 | -0.25 | 5.99E-01 |
| RNF145   | -1.70 | 9.56E-01 | -0.05 | 5.21E-01 | 0.44  | 3.29E-01 |
| AGFG2    | -1.70 | 9.56E-01 | 0.09  | 4.64E-01 | -0.02 | 5.09E-01 |
| TRIM59   | -1.70 | 9.56E-01 | -1.61 | 9.47E-01 | -1.19 | 8.83E-01 |
| TBL2     | -1.71 | 9.56E-01 | -1.24 | 8.93E-01 | -1.32 | 9.07E-01 |
| PGAM5    | -1.71 | 9.56E-01 | -1.15 | 8.75E-01 | -0.81 | 7.90E-01 |
| INPPL1   | -1.71 | 9.56E-01 | 0.11  | 4.56E-01 | 1.17  | 1.20E-01 |
| RXRA     | -1.71 | 9.56E-01 | -0.16 | 5.64E-01 | -1.47 | 9.29E-01 |
| TAC4     | -1.71 | 9.56E-01 | -1.11 | 8.66E-01 | -1.34 | 9.09E-01 |
| FUT5     | -1.71 | 9.56E-01 | -0.86 | 8.04E-01 | -1.33 | 9.08E-01 |
| PCDHB3   | -1.71 | 9.57E-01 | -1.08 | 8.61E-01 | -0.76 | 7.77E-01 |
| EXOC3L4  | -1.71 | 9.57E-01 | -1.05 | 8.52E-01 | -0.61 | 7.30E-01 |
| AMTN     | -1.71 | 9.57E-01 | -1.92 | 9.73E-01 | -0.09 | 5.36E-01 |
| SUSD3    | -1.72 | 9.57E-01 | -0.51 | 6.94E-01 | -0.11 | 5.45E-01 |
| C5orf27  | -1.72 | 9.57E-01 | -0.70 | 7.58E-01 | -0.60 | 7.25E-01 |
| CYP4F22  | -1.72 | 9.57E-01 | -0.59 | 7.21E-01 | -0.02 | 5.06E-01 |
| B3GALNT2 | -1.72 | 9.57E-01 | -0.49 | 6.89E-01 | -0.95 | 8.29E-01 |
| SPTSSB   | -1.72 | 9.57E-01 | -0.49 | 6.86E-01 | 0.02  | 4.93E-01 |
| RTN4     | -1.72 | 9.57E-01 | -1.17 | 8.79E-01 | -0.26 | 6.04E-01 |
| STARD7   | -1.72 | 9.57E-01 | -0.62 | 7.34E-01 | -0.39 | 6.50E-01 |
| NKX2-5   | -1.72 | 9.57E-01 | 0.36  | 3.58E-01 | 0.53  | 2.98E-01 |
| TIMM22   | -1.72 | 9.57E-01 | -1.28 | 9.00E-01 | -0.37 | 6.45E-01 |
| IFT140   | -1.72 | 9.58E-01 | -0.39 | 6.53E-01 | -0.05 | 5.21E-01 |
| GDF6     | -1.72 | 9.58E-01 | -1.33 | 9.08E-01 | -0.66 | 7.44E-01 |
| GCM2     | -1.72 | 9.58E-01 | -0.41 | 6.59E-01 | 0.71  | 2.39E-01 |
| SLC39A4  | -1.72 | 9.58E-01 | -0.71 | 7.60E-01 | -1.32 | 9.07E-01 |
| PPP5C    | -1.73 | 9.58E-01 | -1.59 | 9.44E-01 | -1.46 | 9.28E-01 |
| TFEC     | -1.73 | 9.58E-01 | -2.04 | 9.79E-01 | -2.12 | 9.83E-01 |
| CYTH4    | -1.73 | 9.58E-01 | -1.34 | 9.09E-01 | -1.75 | 9.60E-01 |
| ANAPC7   | -1.73 | 9.58E-01 | -1.28 | 8.99E-01 | -1.24 | 8.92E-01 |

|           |       |          |       |          |       |          |
|-----------|-------|----------|-------|----------|-------|----------|
| GLI3      | -1.73 | 9.58E-01 | -1.00 | 8.42E-01 | 1.51  | 6.55E-02 |
| CD22      | -1.74 | 9.59E-01 | -1.33 | 9.08E-01 | -2.55 | 9.95E-01 |
| CD38      | -1.74 | 9.59E-01 | -1.26 | 8.96E-01 | -1.65 | 9.51E-01 |
| MTG1      | -1.74 | 9.59E-01 | -0.06 | 5.23E-01 | 0.30  | 3.83E-01 |
| TCL1B     | -1.74 | 9.59E-01 | -0.65 | 7.44E-01 | -0.73 | 7.69E-01 |
| RTP4      | -1.74 | 9.59E-01 | -0.80 | 7.88E-01 | -0.37 | 6.43E-01 |
| ATP6V1C1  | -1.74 | 9.59E-01 | -1.20 | 8.85E-01 | -2.01 | 9.78E-01 |
| C1orf143  | -1.74 | 9.59E-01 | 0.50  | 3.07E-01 | 0.50  | 3.08E-01 |
| TOMM5     | -1.74 | 9.59E-01 | 0.11  | 4.57E-01 | -0.14 | 5.54E-01 |
| PLXDC1    | -1.74 | 9.59E-01 | -0.91 | 8.18E-01 | 0.08  | 4.69E-01 |
| PRDX3     | -1.75 | 9.60E-01 | 0.09  | 4.63E-01 | -0.57 | 7.16E-01 |
| CKS1B     | -1.75 | 9.60E-01 | -0.02 | 5.08E-01 | 0.13  | 4.48E-01 |
| FAM216B   | -1.75 | 9.60E-01 | -0.45 | 6.72E-01 | 0.06  | 4.75E-01 |
| GFPT2     | -1.75 | 9.60E-01 | -1.10 | 8.63E-01 | 0.09  | 4.65E-01 |
| TMPRSS3   | -1.75 | 9.60E-01 | -1.15 | 8.76E-01 | 0.24  | 4.04E-01 |
| SEC31A    | -1.75 | 9.60E-01 | -0.77 | 7.80E-01 | -1.35 | 9.11E-01 |
| HPN       | -1.75 | 9.60E-01 | -2.12 | 9.83E-01 | -0.61 | 7.29E-01 |
| PDE4D     | -1.75 | 9.60E-01 | -2.29 | 9.89E-01 | -0.97 | 8.35E-01 |
| CNKSR1    | -1.75 | 9.60E-01 | -1.45 | 9.27E-01 | -2.14 | 9.84E-01 |
| MUC5AC    | -1.75 | 9.60E-01 | -1.28 | 9.00E-01 | -1.24 | 8.92E-01 |
| TMEM102   | -1.76 | 9.60E-01 | -0.86 | 8.06E-01 | -0.60 | 7.25E-01 |
| CHRNE     | -1.76 | 9.60E-01 | 0.91  | 1.81E-01 | 1.63  | 5.19E-02 |
| LINC00692 | -1.76 | 9.60E-01 | 0.25  | 4.03E-01 | 0.29  | 3.85E-01 |
| MAFF      | -1.76 | 9.61E-01 | -0.92 | 8.21E-01 | -0.68 | 7.52E-01 |
| RPS6KA4   | -1.76 | 9.61E-01 | -0.20 | 5.79E-01 | 0.16  | 4.37E-01 |
| MARK1     | -1.76 | 9.61E-01 | -0.65 | 7.42E-01 | -0.66 | 7.45E-01 |
| MCFD2     | -1.76 | 9.61E-01 | -0.33 | 6.31E-01 | -1.05 | 8.54E-01 |
| AP3S1     | -1.76 | 9.61E-01 | -0.44 | 6.69E-01 | -0.90 | 8.16E-01 |
| RTL1      | -1.76 | 9.61E-01 | -1.47 | 9.30E-01 | -1.23 | 8.91E-01 |
| KCNC4     | -1.76 | 9.61E-01 | -0.86 | 8.05E-01 | -1.97 | 9.76E-01 |
| USF1      | -1.77 | 9.61E-01 | -0.58 | 7.20E-01 | 0.85  | 1.96E-01 |

|          |       |          |       |          |       |          |
|----------|-------|----------|-------|----------|-------|----------|
| CCR4     | -1.77 | 9.61E-01 | -0.54 | 7.07E-01 | 0.06  | 4.75E-01 |
| TARBP1   | -1.77 | 9.62E-01 | -0.71 | 7.61E-01 | -1.68 | 9.54E-01 |
| ISPD     | -1.77 | 9.62E-01 | 0.04  | 4.83E-01 | -0.16 | 5.65E-01 |
| COA7     | -1.77 | 9.62E-01 | 0.88  | 1.90E-01 | 0.83  | 2.04E-01 |
| TCF21    | -1.77 | 9.62E-01 | -1.95 | 9.74E-01 | -1.64 | 9.50E-01 |
| TMTC2    | -1.77 | 9.62E-01 | -0.83 | 7.96E-01 | -0.51 | 6.95E-01 |
| STAB2    | -1.77 | 9.62E-01 | -0.39 | 6.52E-01 | -0.40 | 6.54E-01 |
| CAPG     | -1.77 | 9.62E-01 | -0.36 | 6.39E-01 | 0.69  | 2.45E-01 |
| RBM11    | -1.78 | 9.62E-01 | 1.43  | 7.62E-02 | 1.23  | 1.10E-01 |
| RRAGC    | -1.78 | 9.62E-01 | -0.88 | 8.11E-01 | -0.62 | 7.33E-01 |
| FASTKD3  | -1.78 | 9.62E-01 | -0.32 | 6.25E-01 | 0.51  | 3.04E-01 |
| TRMT1    | -1.78 | 9.62E-01 | 0.69  | 2.46E-01 | 1.31  | 9.59E-02 |
| ITIH4    | -1.78 | 9.62E-01 | 0.08  | 4.68E-01 | 0.90  | 1.83E-01 |
| MMP15    | -1.78 | 9.62E-01 | -0.24 | 5.96E-01 | 0.28  | 3.91E-01 |
| OSER1    | -1.78 | 9.62E-01 | -0.51 | 6.97E-01 | -0.52 | 6.98E-01 |
| FGD5     | -1.78 | 9.63E-01 | -0.24 | 5.95E-01 | -0.28 | 6.11E-01 |
| NR2F2    | -1.78 | 9.63E-01 | -0.23 | 5.91E-01 | -0.36 | 6.42E-01 |
| KNTC1    | -1.78 | 9.63E-01 | -1.39 | 9.17E-01 | -0.82 | 7.94E-01 |
| S100A16  | -1.79 | 9.63E-01 | -1.34 | 9.10E-01 | -1.19 | 8.83E-01 |
| C6orf222 | -1.79 | 9.63E-01 | -1.99 | 9.77E-01 | -0.50 | 6.91E-01 |
| TMC8     | -1.79 | 9.63E-01 | 0.12  | 4.54E-01 | 0.36  | 3.61E-01 |
| EIF2B4   | -1.79 | 9.63E-01 | -1.06 | 8.55E-01 | -0.51 | 6.96E-01 |
| VSIG10L  | -1.79 | 9.63E-01 | -2.06 | 9.80E-01 | -1.51 | 9.35E-01 |
| KDELC1   | -1.79 | 9.63E-01 | -0.46 | 6.79E-01 | -0.18 | 5.73E-01 |
| TTLL2    | -1.79 | 9.63E-01 | -1.64 | 9.49E-01 | -0.12 | 5.48E-01 |
| SLC15A4  | -1.79 | 9.63E-01 | -0.13 | 5.53E-01 | -0.56 | 7.11E-01 |
| EGLN2    | -1.79 | 9.63E-01 | -1.05 | 8.53E-01 | -0.76 | 7.78E-01 |
| CPSF1    | -1.79 | 9.63E-01 | -0.52 | 6.98E-01 | -0.16 | 5.62E-01 |
| C8orf56  | -1.79 | 9.64E-01 | -0.50 | 6.93E-01 | -0.83 | 7.96E-01 |
| PAIP2    | -1.79 | 9.64E-01 | 0.68  | 2.48E-01 | 0.45  | 3.26E-01 |
| C1orf180 | -1.80 | 9.64E-01 | -0.09 | 5.37E-01 | 0.89  | 1.85E-01 |

|          |       |          |       |          |       |          |
|----------|-------|----------|-------|----------|-------|----------|
| PDCD2    | -1.80 | 9.64E-01 | -0.68 | 7.52E-01 | 0.33  | 3.71E-01 |
| BPGM     | -1.80 | 9.64E-01 | 0.11  | 4.58E-01 | 0.51  | 3.07E-01 |
| NSUN5    | -1.80 | 9.64E-01 | -1.08 | 8.60E-01 | -0.80 | 7.88E-01 |
| EGR4     | -1.80 | 9.64E-01 | -0.78 | 7.83E-01 | -0.97 | 8.34E-01 |
| IFT81    | -1.80 | 9.64E-01 | -2.03 | 9.79E-01 | -1.36 | 9.14E-01 |
| GAS2     | -1.80 | 9.64E-01 | -1.43 | 9.23E-01 | -0.27 | 6.07E-01 |
| FCGR3A   | -1.80 | 9.64E-01 | -1.10 | 8.64E-01 | -2.29 | 9.89E-01 |
| WIP1     | -1.81 | 9.64E-01 | -2.71 | 9.97E-01 | -1.62 | 9.47E-01 |
| C1orf131 | -1.81 | 9.65E-01 | -0.13 | 5.53E-01 | -0.27 | 6.06E-01 |
| LCA5     | -1.81 | 9.65E-01 | -1.02 | 8.46E-01 | 0.07  | 4.71E-01 |
| BICD2    | -1.81 | 9.65E-01 | -0.05 | 5.20E-01 | 0.03  | 4.87E-01 |
| TUBD1    | -1.81 | 9.65E-01 | -1.18 | 8.80E-01 | -2.40 | 9.92E-01 |
| EXOC6B   | -1.81 | 9.65E-01 | -0.71 | 7.62E-01 | -1.11 | 8.66E-01 |
| OR6P1    | -1.81 | 9.65E-01 | -0.94 | 8.27E-01 | -2.03 | 9.79E-01 |
| SNRPA    | -1.81 | 9.65E-01 | -1.23 | 8.90E-01 | -0.51 | 6.95E-01 |
| FAM109A  | -1.82 | 9.65E-01 | -0.25 | 5.99E-01 | 0.20  | 4.22E-01 |
| RCOR2    | -1.82 | 9.65E-01 | -0.07 | 5.28E-01 | -0.12 | 5.47E-01 |
| SIGLEC9  | -1.82 | 9.65E-01 | -0.33 | 6.30E-01 | -0.14 | 5.54E-01 |
| DLX1     | -1.82 | 9.65E-01 | -0.46 | 6.76E-01 | -0.14 | 5.58E-01 |
| ZP2      | -1.82 | 9.66E-01 | -2.12 | 9.83E-01 | -0.13 | 5.53E-01 |
| FBXO10   | -1.82 | 9.66E-01 | -1.52 | 9.36E-01 | -0.34 | 6.35E-01 |
| C19orf67 | -1.82 | 9.66E-01 | 0.06  | 4.77E-01 | -0.20 | 5.79E-01 |
| NCK2     | -1.83 | 9.66E-01 | -0.69 | 7.56E-01 | -1.32 | 9.06E-01 |
| PIGN     | -1.83 | 9.66E-01 | 0.48  | 3.14E-01 | 1.03  | 1.52E-01 |
| MROH7    | -1.83 | 9.66E-01 | -1.26 | 8.97E-01 | -1.02 | 8.46E-01 |
| SERPING1 | -1.83 | 9.66E-01 | 0.43  | 3.34E-01 | 0.57  | 2.84E-01 |
| PRNP     | -1.83 | 9.67E-01 | -0.48 | 6.86E-01 | -0.10 | 5.42E-01 |
| USP39    | -1.84 | 9.67E-01 | -1.19 | 8.84E-01 | -0.39 | 6.53E-01 |
| RNF32    | -1.84 | 9.67E-01 | -0.52 | 6.97E-01 | 0.02  | 4.94E-01 |
| GNPDA1   | -1.84 | 9.67E-01 | -1.23 | 8.90E-01 | -0.97 | 8.35E-01 |
| TC2N     | -1.84 | 9.67E-01 | -0.95 | 8.30E-01 | -0.43 | 6.66E-01 |

|           |       |          |       |          |       |          |
|-----------|-------|----------|-------|----------|-------|----------|
| RIMS2     | -1.84 | 9.67E-01 | -0.48 | 6.84E-01 | -0.32 | 6.26E-01 |
| GOLGA7B   | -1.84 | 9.67E-01 | -0.99 | 8.38E-01 | -0.55 | 7.08E-01 |
| DCD       | -1.84 | 9.67E-01 | -1.65 | 9.50E-01 | -1.55 | 9.39E-01 |
| KBTBD2    | -1.85 | 9.68E-01 | -1.37 | 9.15E-01 | -1.26 | 8.96E-01 |
| C17orf103 | -1.85 | 9.68E-01 | -1.06 | 8.55E-01 | -1.47 | 9.29E-01 |
| CEP128    | -1.85 | 9.68E-01 | -0.94 | 8.26E-01 | -0.81 | 7.92E-01 |
| C19orf69  | -1.85 | 9.68E-01 | -0.43 | 6.66E-01 | -0.29 | 6.16E-01 |
| LACRT     | -1.85 | 9.68E-01 | -0.25 | 5.99E-01 | -0.54 | 7.07E-01 |
| PPP1R3D   | -1.85 | 9.68E-01 | -2.11 | 9.83E-01 | -1.61 | 9.46E-01 |
| CAPZA2    | -1.85 | 9.68E-01 | -0.11 | 5.46E-01 | -1.16 | 8.77E-01 |
| LRP2      | -1.85 | 9.68E-01 | 0.00  | 5.00E-01 | -0.39 | 6.52E-01 |
| PPP1R1A   | -1.85 | 9.68E-01 | -1.58 | 9.43E-01 | -0.45 | 6.73E-01 |
| LMOD1     | -1.85 | 9.68E-01 | -1.52 | 9.36E-01 | -0.54 | 7.04E-01 |
| HPS3      | -1.86 | 9.68E-01 | -2.08 | 9.81E-01 | -0.78 | 7.83E-01 |
| SLC39A10  | -1.86 | 9.69E-01 | -0.77 | 7.79E-01 | -1.12 | 8.69E-01 |
| ZNF823    | -1.86 | 9.69E-01 | -0.10 | 5.40E-01 | 0.47  | 3.19E-01 |
| CABP2     | -1.86 | 9.69E-01 | -1.30 | 9.04E-01 | -1.12 | 8.68E-01 |
| PLA2G3    | -1.86 | 9.69E-01 | -2.20 | 9.86E-01 | -1.18 | 8.81E-01 |
| MAB21L1   | -1.86 | 9.69E-01 | 0.25  | 4.01E-01 | 0.11  | 4.55E-01 |
| VDAC3     | -1.87 | 9.69E-01 | -1.45 | 9.26E-01 | -1.24 | 8.92E-01 |
| NAT8      | -1.87 | 9.69E-01 | -1.07 | 8.57E-01 | -2.11 | 9.82E-01 |
| MIA       | -1.87 | 9.69E-01 | -0.73 | 7.67E-01 | -0.49 | 6.89E-01 |
| DNA2      | -1.88 | 9.70E-01 | -0.76 | 7.75E-01 | -0.34 | 6.33E-01 |
| TAB2      | -1.88 | 9.70E-01 | -0.64 | 7.39E-01 | -1.90 | 9.71E-01 |
| RGS1      | -1.88 | 9.70E-01 | -1.52 | 9.36E-01 | -0.95 | 8.30E-01 |
| ITPRIP    | -1.88 | 9.70E-01 | -0.54 | 7.05E-01 | -0.62 | 7.33E-01 |
| RNFT1     | -1.88 | 9.70E-01 | -1.17 | 8.80E-01 | -2.46 | 9.93E-01 |
| IGLON5    | -1.88 | 9.70E-01 | -1.19 | 8.82E-01 | -1.13 | 8.71E-01 |
| IFNA10    | -1.88 | 9.70E-01 | -2.29 | 9.89E-01 | -2.15 | 9.84E-01 |
| RNF125    | -1.89 | 9.70E-01 | -0.16 | 5.64E-01 | -0.66 | 7.46E-01 |
| LMF1      | -1.89 | 9.71E-01 | -0.57 | 7.17E-01 | 0.65  | 2.59E-01 |

|               |       |          |       |          |       |          |
|---------------|-------|----------|-------|----------|-------|----------|
| PPAP2B        | -1.89 | 9.71E-01 | -0.13 | 5.50E-01 | 0.18  | 4.28E-01 |
| ZG16          | -1.89 | 9.71E-01 | -0.36 | 6.40E-01 | -0.36 | 6.39E-01 |
| SNUPN         | -1.89 | 9.71E-01 | -0.64 | 7.39E-01 | -1.16 | 8.76E-01 |
| RAB31         | -1.89 | 9.71E-01 | -1.34 | 9.10E-01 | -0.16 | 5.62E-01 |
| GATA6         | -1.89 | 9.71E-01 | -2.25 | 9.88E-01 | -1.68 | 9.54E-01 |
| HK3           | -1.90 | 9.71E-01 | -1.21 | 8.87E-01 | -2.77 | 9.97E-01 |
| SLC10A1       | -1.90 | 9.71E-01 | -1.26 | 8.96E-01 | -1.80 | 9.64E-01 |
| RP11-613M10.8 | -1.90 | 9.71E-01 | -1.48 | 9.31E-01 | -0.33 | 6.31E-01 |
| DLD           | -1.90 | 9.71E-01 | -0.43 | 6.68E-01 | -0.41 | 6.59E-01 |
| DGCR6         | -1.90 | 9.71E-01 | -1.18 | 8.81E-01 | -0.16 | 5.64E-01 |
| DGCR6L        | -1.90 | 9.71E-01 | -1.22 | 8.88E-01 | -0.95 | 8.30E-01 |
| ERCC2         | -1.90 | 9.71E-01 | -0.73 | 7.67E-01 | -0.62 | 7.32E-01 |
| C2orf69       | -1.90 | 9.71E-01 | -0.68 | 7.50E-01 | -0.84 | 7.99E-01 |
| HBQ1          | -1.90 | 9.71E-01 | -0.18 | 5.70E-01 | -0.08 | 5.33E-01 |
| HMCN2         | -1.90 | 9.71E-01 | -0.94 | 8.27E-01 | -0.52 | 6.97E-01 |
| TSPAN11       | -1.90 | 9.72E-01 | -0.27 | 6.08E-01 | -1.04 | 8.52E-01 |
| N4BP2L2       | -1.91 | 9.72E-01 | -1.96 | 9.75E-01 | -0.62 | 7.34E-01 |
| RNF224        | -1.91 | 9.72E-01 | -0.39 | 6.53E-01 | -0.04 | 5.15E-01 |
| COPS4         | -1.91 | 9.72E-01 | -0.76 | 7.76E-01 | -0.32 | 6.24E-01 |
| HES3          | -1.91 | 9.72E-01 | -0.65 | 7.41E-01 | -0.70 | 7.57E-01 |
| RPUSD4        | -1.91 | 9.72E-01 | -0.23 | 5.89E-01 | 0.70  | 2.41E-01 |
| ADCK1         | -1.92 | 9.72E-01 | -1.14 | 8.72E-01 | -1.92 | 9.72E-01 |
| LMAN1         | -1.92 | 9.72E-01 | -1.34 | 9.10E-01 | -2.41 | 9.92E-01 |
| ADH1B         | -1.92 | 9.72E-01 | 0.20  | 4.22E-01 | -0.62 | 7.33E-01 |
| PRG3          | -1.92 | 9.73E-01 | 0.26  | 3.97E-01 | -0.06 | 5.24E-01 |
| ADCK5         | -1.92 | 9.73E-01 | -0.66 | 7.47E-01 | -0.31 | 6.23E-01 |
| ARL6IP1       | -1.92 | 9.73E-01 | -2.17 | 9.85E-01 | -1.24 | 8.93E-01 |
| RP11-113D6.10 | -1.92 | 9.73E-01 | -0.78 | 7.82E-01 | -0.16 | 5.64E-01 |
| RPS6KB1       | -1.92 | 9.73E-01 | -1.31 | 9.04E-01 | -2.54 | 9.94E-01 |
| MATR3         | -1.92 | 9.73E-01 | 0.21  | 4.15E-01 | 0.10  | 4.58E-01 |
| JKAMP         | -1.92 | 9.73E-01 | -1.69 | 9.54E-01 | -1.09 | 8.61E-01 |

|              |       |          |       |          |       |          |
|--------------|-------|----------|-------|----------|-------|----------|
| TMEM229B     | -1.92 | 9.73E-01 | -1.43 | 9.24E-01 | -0.84 | 8.00E-01 |
| RIC3         | -1.93 | 9.73E-01 | -0.29 | 6.12E-01 | -0.11 | 5.46E-01 |
| RP11-211G3.3 | -1.93 | 9.73E-01 | -1.73 | 9.58E-01 | 0.05  | 4.81E-01 |
| TPMT         | -1.93 | 9.73E-01 | -0.08 | 5.30E-01 | 0.97  | 1.66E-01 |
| ASAP1        | -1.93 | 9.73E-01 | -1.68 | 9.53E-01 | -1.16 | 8.77E-01 |
| FLT4         | -1.94 | 9.74E-01 | -0.32 | 6.27E-01 | -0.63 | 7.37E-01 |
| GIPC2        | -1.94 | 9.74E-01 | -0.53 | 7.04E-01 | 0.33  | 3.70E-01 |
| MICAL2       | -1.94 | 9.74E-01 | -1.24 | 8.93E-01 | 0.86  | 1.94E-01 |
| MRPS26       | -1.94 | 9.74E-01 | -0.59 | 7.23E-01 | -0.44 | 6.71E-01 |
| SREK1        | -1.95 | 9.74E-01 | -0.28 | 6.11E-01 | -0.92 | 8.20E-01 |
| SLC26A11     | -1.95 | 9.74E-01 | 0.56  | 2.86E-01 | -0.48 | 6.83E-01 |
| OR10P1       | -1.95 | 9.74E-01 | -0.37 | 6.43E-01 | -0.17 | 5.67E-01 |
| SLC35E3      | -1.95 | 9.75E-01 | -0.23 | 5.90E-01 | -0.74 | 7.72E-01 |
| CER1         | -1.95 | 9.75E-01 | -0.09 | 5.35E-01 | -0.29 | 6.13E-01 |
| GIMAP6       | -1.96 | 9.75E-01 | -0.60 | 7.26E-01 | -0.25 | 6.00E-01 |
| RXFP2        | -1.96 | 9.75E-01 | -1.41 | 9.21E-01 | -1.16 | 8.76E-01 |
| SLC9A9       | -1.96 | 9.75E-01 | -1.00 | 8.41E-01 | -2.77 | 9.97E-01 |
| ZNF561       | -1.97 | 9.76E-01 | -0.91 | 8.18E-01 | -0.27 | 6.05E-01 |
| SIN3B        | -1.97 | 9.76E-01 | 0.38  | 3.52E-01 | 0.41  | 3.40E-01 |
| ZCCHC24      | -1.97 | 9.76E-01 | -0.60 | 7.27E-01 | -0.54 | 7.04E-01 |
| CNGB3        | -1.98 | 9.76E-01 | -0.54 | 7.04E-01 | -0.07 | 5.27E-01 |
| STIL         | -1.98 | 9.76E-01 | 0.89  | 1.87E-01 | 1.20  | 1.15E-01 |
| THAP10       | -1.98 | 9.76E-01 | -1.20 | 8.85E-01 | 0.08  | 4.68E-01 |
| METTL11B     | -1.98 | 9.76E-01 | -0.93 | 8.25E-01 | -1.64 | 9.50E-01 |
| NKX2-4       | -1.98 | 9.76E-01 | 0.07  | 4.72E-01 | 0.04  | 4.82E-01 |
| RHBDD3       | -1.98 | 9.76E-01 | -1.71 | 9.56E-01 | -2.00 | 9.77E-01 |
| ACTRT2       | -1.99 | 9.77E-01 | -0.52 | 6.97E-01 | -0.60 | 7.27E-01 |
| RUFY2        | -1.99 | 9.77E-01 | 0.06  | 4.77E-01 | 0.09  | 4.65E-01 |
| RTP2         | -1.99 | 9.77E-01 | -0.71 | 7.60E-01 | -0.36 | 6.40E-01 |
| ITGBL1       | -1.99 | 9.77E-01 | 0.67  | 2.50E-01 | 0.38  | 3.53E-01 |
| ZZZ3         | -1.99 | 9.77E-01 | 0.00  | 4.99E-01 | 0.38  | 3.51E-01 |

|          |       |          |       |          |       |          |
|----------|-------|----------|-------|----------|-------|----------|
| OR2L2    | -1.99 | 9.77E-01 | 0.38  | 3.53E-01 | 0.64  | 2.59E-01 |
| PRRX1    | -2.00 | 9.77E-01 | -1.77 | 9.62E-01 | -1.76 | 9.61E-01 |
| ZNF431   | -2.00 | 9.77E-01 | -0.85 | 8.03E-01 | 0.21  | 4.19E-01 |
| C19orf70 | -2.00 | 9.77E-01 | -0.24 | 5.94E-01 | -0.21 | 5.84E-01 |
| PRSS22   | -2.00 | 9.77E-01 | 0.68  | 2.48E-01 | 1.20  | 1.16E-01 |
| OR7D4    | -2.00 | 9.77E-01 | -1.44 | 9.26E-01 | -1.58 | 9.43E-01 |
| NPY      | -2.00 | 9.78E-01 | 0.59  | 2.77E-01 | 0.65  | 2.57E-01 |
| WDR41    | -2.01 | 9.78E-01 | -0.96 | 8.33E-01 | -1.18 | 8.81E-01 |
| FAM35A   | -2.01 | 9.78E-01 | -1.23 | 8.90E-01 | -0.53 | 7.00E-01 |
| CYP39A1  | -2.01 | 9.78E-01 | -0.49 | 6.87E-01 | 0.08  | 4.66E-01 |
| C1orf95  | -2.01 | 9.78E-01 | -1.06 | 8.55E-01 | -0.53 | 7.02E-01 |
| STAC2    | -2.01 | 9.78E-01 | -0.18 | 5.71E-01 | 0.10  | 4.62E-01 |
| HNRNPU   | -2.01 | 9.78E-01 | -1.96 | 9.75E-01 | -2.17 | 9.85E-01 |
| KIAA1407 | -2.01 | 9.78E-01 | -1.44 | 9.25E-01 | -1.53 | 9.37E-01 |
| ALPPL2   | -2.01 | 9.78E-01 | -0.54 | 7.05E-01 | -0.40 | 6.56E-01 |
| DHRS3    | -2.01 | 9.78E-01 | 0.37  | 3.57E-01 | -0.27 | 6.06E-01 |
| FAM210A  | -2.01 | 9.78E-01 | -0.21 | 5.84E-01 | 0.51  | 3.03E-01 |
| IPPK     | -2.02 | 9.78E-01 | -0.20 | 5.78E-01 | -0.67 | 7.50E-01 |
| PMM1     | -2.02 | 9.79E-01 | -1.47 | 9.30E-01 | -1.67 | 9.52E-01 |
| TYW5     | -2.03 | 9.79E-01 | -0.68 | 7.52E-01 | -1.09 | 8.62E-01 |
| IL17REL  | -2.03 | 9.79E-01 | -0.09 | 5.37E-01 | -0.03 | 5.11E-01 |
| SPRR2E   | -2.03 | 9.79E-01 | -0.58 | 7.18E-01 | -0.61 | 7.28E-01 |
| LPGAT1   | -2.03 | 9.79E-01 | -1.39 | 9.17E-01 | -0.38 | 6.49E-01 |
| C4orf50  | -2.04 | 9.79E-01 | -1.33 | 9.08E-01 | -1.64 | 9.50E-01 |
| SPATA6L  | -2.04 | 9.79E-01 | -1.04 | 8.51E-01 | -0.60 | 7.25E-01 |
| SYNDIG1  | -2.04 | 9.79E-01 | -1.44 | 9.26E-01 | -0.77 | 7.78E-01 |
| KRTAP2-1 | -2.04 | 9.79E-01 | -0.05 | 5.22E-01 | 0.14  | 4.44E-01 |
| EVC2     | -2.04 | 9.79E-01 | -0.40 | 6.55E-01 | 0.41  | 3.41E-01 |
| DNAJB5   | -2.04 | 9.79E-01 | -1.17 | 8.79E-01 | -2.42 | 9.92E-01 |
| B3GAT2   | -2.04 | 9.80E-01 | -1.29 | 9.02E-01 | -0.57 | 7.17E-01 |
| CHIT1    | -2.04 | 9.80E-01 | -1.51 | 9.34E-01 | -0.58 | 7.20E-01 |



|           |       |          |       |          |       |          |
|-----------|-------|----------|-------|----------|-------|----------|
| SRL       | -2.05 | 9.80E-01 | -1.71 | 9.57E-01 | -0.76 | 7.78E-01 |
| RAP1B     | -2.05 | 9.80E-01 | -0.97 | 8.34E-01 | -1.07 | 8.59E-01 |
| VILL      | -2.05 | 9.80E-01 | 0.33  | 3.69E-01 | 0.08  | 4.67E-01 |
| DHCR7     | -2.05 | 9.80E-01 | 0.05  | 4.79E-01 | 0.37  | 3.55E-01 |
| ARGLU1    | -2.05 | 9.80E-01 | -0.20 | 5.80E-01 | 0.06  | 4.74E-01 |
| FEZF2     | -2.05 | 9.80E-01 | 0.62  | 2.68E-01 | 0.64  | 2.62E-01 |
| OR52L1    | -2.06 | 9.80E-01 | -0.33 | 6.28E-01 | 0.16  | 4.36E-01 |
| GFRAL     | -2.06 | 9.80E-01 | -0.74 | 7.69E-01 | -0.23 | 5.92E-01 |
| UBTF      | -2.06 | 9.80E-01 | -1.93 | 9.73E-01 | -1.67 | 9.53E-01 |
| CST5      | -2.06 | 9.80E-01 | -0.28 | 6.09E-01 | 0.07  | 4.72E-01 |
| TBC1D20   | -2.07 | 9.81E-01 | -0.54 | 7.04E-01 | -0.28 | 6.11E-01 |
| SMC4      | -2.07 | 9.81E-01 | -1.61 | 9.47E-01 | -1.50 | 9.34E-01 |
| ANKFN1    | -2.07 | 9.81E-01 | -0.28 | 6.10E-01 | -0.44 | 6.70E-01 |
| SLC43A3   | -2.07 | 9.81E-01 | -0.24 | 5.93E-01 | 0.88  | 1.89E-01 |
| C9orf9    | -2.08 | 9.81E-01 | -0.78 | 7.83E-01 | -0.75 | 7.73E-01 |
| SOX30     | -2.08 | 9.81E-01 | -0.76 | 7.76E-01 | -0.28 | 6.10E-01 |
| QTRTD1    | -2.08 | 9.81E-01 | -1.63 | 9.49E-01 | -1.39 | 9.18E-01 |
| PPP1R2    | -2.08 | 9.81E-01 | -1.50 | 9.33E-01 | -2.62 | 9.96E-01 |
| DUPD1     | -2.08 | 9.81E-01 | 0.13  | 4.47E-01 | 0.26  | 3.96E-01 |
| PGLYRP2   | -2.09 | 9.82E-01 | 0.71  | 2.40E-01 | 0.98  | 1.63E-01 |
| CREM      | -2.09 | 9.82E-01 | -1.38 | 9.16E-01 | -1.03 | 8.48E-01 |
| RNASE2    | -2.09 | 9.82E-01 | -0.49 | 6.90E-01 | -0.59 | 7.22E-01 |
| TMEM156   | -2.09 | 9.82E-01 | 0.40  | 3.43E-01 | -0.23 | 5.91E-01 |
| UBAC1     | -2.10 | 9.82E-01 | -0.36 | 6.40E-01 | 0.04  | 4.84E-01 |
| FAM69C    | -2.10 | 9.82E-01 | -0.58 | 7.18E-01 | -0.24 | 5.94E-01 |
| CXCR4     | -2.10 | 9.82E-01 | 0.26  | 3.96E-01 | -0.32 | 6.24E-01 |
| UCN2      | -2.12 | 9.83E-01 | -0.09 | 5.34E-01 | 0.29  | 3.86E-01 |
| MIA-RAB4B | -2.12 | 9.83E-01 | -1.04 | 8.52E-01 | -0.93 | 8.23E-01 |
| YPEL3     | -2.12 | 9.83E-01 | -0.52 | 6.99E-01 | -0.19 | 5.73E-01 |
| SOX8      | -2.13 | 9.83E-01 | -0.10 | 5.40E-01 | 0.71  | 2.39E-01 |
| STXBP5L   | -2.13 | 9.83E-01 | -1.82 | 9.65E-01 | -2.03 | 9.79E-01 |

|           |       |          |       |          |       |          |
|-----------|-------|----------|-------|----------|-------|----------|
| MBP       | -2.14 | 9.84E-01 | -1.43 | 9.24E-01 | -0.42 | 6.63E-01 |
| FKBP8     | -2.14 | 9.84E-01 | -1.44 | 9.25E-01 | -1.47 | 9.29E-01 |
| DCP1A     | -2.15 | 9.84E-01 | -0.78 | 7.83E-01 | -0.37 | 6.43E-01 |
| IFNLR1    | -2.15 | 9.84E-01 | -1.27 | 8.97E-01 | -0.61 | 7.29E-01 |
| MIIP      | -2.15 | 9.84E-01 | 0.42  | 3.39E-01 | 0.98  | 1.63E-01 |
| SMG1      | -2.15 | 9.84E-01 | -3.14 | 9.99E-01 | -1.39 | 9.17E-01 |
| CUL2      | -2.15 | 9.84E-01 | -1.20 | 8.85E-01 | -1.14 | 8.73E-01 |
| WDR31     | -2.16 | 9.84E-01 | -0.39 | 6.53E-01 | -1.28 | 8.99E-01 |
| MAS1L     | -2.16 | 9.85E-01 | -0.75 | 7.75E-01 | -0.44 | 6.71E-01 |
| GAS8      | -2.17 | 9.85E-01 | -1.48 | 9.31E-01 | -0.53 | 7.01E-01 |
| LTBR      | -2.17 | 9.85E-01 | -0.01 | 5.06E-01 | 0.14  | 4.44E-01 |
| BEND3     | -2.17 | 9.85E-01 | -1.12 | 8.68E-01 | -0.54 | 7.06E-01 |
| SLC36A4   | -2.17 | 9.85E-01 | -1.60 | 9.46E-01 | -0.86 | 8.05E-01 |
| LRIT2     | -2.17 | 9.85E-01 | 0.02  | 4.92E-01 | 0.52  | 3.03E-01 |
| CYP7A1    | -2.18 | 9.85E-01 | -0.72 | 7.65E-01 | 0.00  | 5.01E-01 |
| PPP1R9A   | -2.19 | 9.86E-01 | -0.42 | 6.62E-01 | -1.18 | 8.81E-01 |
| HBM       | -2.19 | 9.86E-01 | 0.35  | 3.64E-01 | 0.49  | 3.13E-01 |
| HECW2     | -2.19 | 9.86E-01 | -0.07 | 5.30E-01 | 0.52  | 3.02E-01 |
| SLC14A1   | -2.20 | 9.86E-01 | -1.12 | 8.69E-01 | -1.28 | 9.00E-01 |
| CLEC2B    | -2.20 | 9.86E-01 | -1.80 | 9.64E-01 | -1.30 | 9.03E-01 |
| ATP2A2    | -2.20 | 9.86E-01 | -1.64 | 9.49E-01 | -1.32 | 9.06E-01 |
| PCDHB5    | -2.20 | 9.86E-01 | -1.66 | 9.52E-01 | -0.51 | 6.96E-01 |
| FOXE3     | -2.20 | 9.86E-01 | -1.19 | 8.82E-01 | -1.67 | 9.52E-01 |
| UBE2N     | -2.21 | 9.87E-01 | -1.00 | 8.40E-01 | -0.61 | 7.28E-01 |
| L3HYPDH   | -2.21 | 9.87E-01 | -2.11 | 9.83E-01 | -1.01 | 8.44E-01 |
| CYSLTR2   | -2.22 | 9.87E-01 | -0.51 | 6.95E-01 | 0.03  | 4.89E-01 |
| EFCAB13   | -2.22 | 9.87E-01 | -0.12 | 5.47E-01 | 0.73  | 2.33E-01 |
| ACAA2     | -2.22 | 9.87E-01 | -0.40 | 6.54E-01 | -1.00 | 8.42E-01 |
| SOX11     | -2.24 | 9.87E-01 | -0.23 | 5.93E-01 | 0.52  | 3.03E-01 |
| PGGT1B    | -2.24 | 9.88E-01 | -0.90 | 8.16E-01 | -1.40 | 9.19E-01 |
| KRTAP19-8 | -2.25 | 9.88E-01 | -0.34 | 6.32E-01 | 0.03  | 4.90E-01 |

|           |       |          |       |          |       |          |
|-----------|-------|----------|-------|----------|-------|----------|
| UPF3A     | -2.26 | 9.88E-01 | -0.19 | 5.74E-01 | -0.05 | 5.21E-01 |
| SPEF2     | -2.27 | 9.88E-01 | -0.99 | 8.39E-01 | -1.69 | 9.54E-01 |
| OTOP2     | -2.28 | 9.89E-01 | -1.09 | 8.61E-01 | -1.68 | 9.54E-01 |
| CCDC40    | -2.28 | 9.89E-01 | -0.54 | 7.06E-01 | 0.06  | 4.75E-01 |
| LIN54     | -2.28 | 9.89E-01 | -0.60 | 7.25E-01 | -0.27 | 6.08E-01 |
| CYB5RL    | -2.29 | 9.89E-01 | -1.90 | 9.71E-01 | -0.87 | 8.09E-01 |
| CNOT10    | -2.30 | 9.89E-01 | -0.21 | 5.85E-01 | 0.43  | 3.33E-01 |
| FAM131B   | -2.31 | 9.90E-01 | -0.08 | 5.30E-01 | -0.12 | 5.47E-01 |
| IFLTD1    | -2.32 | 9.90E-01 | -1.11 | 8.65E-01 | -0.25 | 6.00E-01 |
| LINC00908 | -2.32 | 9.90E-01 | -1.04 | 8.51E-01 | -1.49 | 9.32E-01 |
| GORAB     | -2.34 | 9.90E-01 | -0.81 | 7.90E-01 | -0.81 | 7.92E-01 |
| EYA3      | -2.36 | 9.91E-01 | -0.91 | 8.19E-01 | -0.07 | 5.26E-01 |
| MUSTN1    | -2.37 | 9.91E-01 | 0.36  | 3.60E-01 | 0.84  | 2.00E-01 |
| VCAN      | -2.37 | 9.91E-01 | -0.69 | 7.54E-01 | 0.89  | 1.86E-01 |
| PPP1R3E   | -2.38 | 9.91E-01 | 0.00  | 4.99E-01 | -0.24 | 5.94E-01 |
| IFNA5     | -2.41 | 9.92E-01 | -1.52 | 9.36E-01 | -1.23 | 8.91E-01 |
| HECW1     | -2.41 | 9.92E-01 | -0.07 | 5.28E-01 | -0.71 | 7.61E-01 |
| MDM2      | -2.42 | 9.92E-01 | -0.24 | 5.94E-01 | -0.26 | 6.02E-01 |
| LHX6      | -2.43 | 9.92E-01 | -1.51 | 9.35E-01 | -1.02 | 8.47E-01 |
| CNOT7     | -2.44 | 9.93E-01 | -0.43 | 6.67E-01 | -1.20 | 8.85E-01 |
| CCR8      | -2.45 | 9.93E-01 | -0.98 | 8.35E-01 | -1.08 | 8.60E-01 |
| LILRB3    | -2.47 | 9.93E-01 | -1.93 | 9.73E-01 | -1.38 | 9.16E-01 |
| LILRA6    | -2.47 | 9.93E-01 | -1.93 | 9.73E-01 | -1.38 | 9.16E-01 |
| FAM167B   | -2.49 | 9.94E-01 | -0.45 | 6.73E-01 | -0.37 | 6.44E-01 |
| ALOX15B   | -2.51 | 9.94E-01 | -0.82 | 7.93E-01 | -0.24 | 5.93E-01 |
| ZNF442    | -2.52 | 9.94E-01 | 1.58  | 5.69E-02 | 1.61  | 5.36E-02 |
| TBC1D16   | -2.54 | 9.94E-01 | -0.23 | 5.91E-01 | 0.26  | 3.97E-01 |
| SLC5A4    | -2.56 | 9.95E-01 | -1.04 | 8.52E-01 | -0.45 | 6.75E-01 |
| PROL1     | -2.56 | 9.95E-01 | -1.94 | 9.74E-01 | -1.32 | 9.07E-01 |
| KDM1B     | -2.56 | 9.95E-01 | -0.94 | 8.27E-01 | -0.77 | 7.81E-01 |
| RAB4B     | -2.58 | 9.95E-01 | -1.34 | 9.09E-01 | -0.60 | 7.25E-01 |

|               |       |          |       |          |       |          |
|---------------|-------|----------|-------|----------|-------|----------|
| RAB4B-EGLN2   | -2.58 | 9.95E-01 | -1.38 | 9.17E-01 | -0.72 | 7.65E-01 |
| KLC3          | -2.59 | 9.95E-01 | -0.64 | 7.39E-01 | -0.50 | 6.93E-01 |
| SNAI1         | -2.60 | 9.95E-01 | -1.73 | 9.58E-01 | -1.29 | 9.01E-01 |
| C17orf112     | -2.60 | 9.95E-01 | -1.18 | 8.81E-01 | -0.86 | 8.04E-01 |
| TGFB2         | -2.60 | 9.95E-01 | -0.51 | 6.96E-01 | -0.54 | 7.05E-01 |
| C12orf79      | -2.63 | 9.96E-01 | -1.59 | 9.44E-01 | -2.32 | 9.90E-01 |
| RNPEPL1       | -2.64 | 9.96E-01 | -1.88 | 9.70E-01 | -1.03 | 8.48E-01 |
| ZBTB5         | -2.66 | 9.96E-01 | -0.57 | 7.17E-01 | 0.23  | 4.09E-01 |
| ZNF519        | -2.66 | 9.96E-01 | -1.73 | 9.58E-01 | -2.37 | 9.91E-01 |
| PSG3          | -2.67 | 9.96E-01 | -1.05 | 8.52E-01 | -0.69 | 7.55E-01 |
| GRHPR         | -2.70 | 9.97E-01 | -0.53 | 7.02E-01 | -0.84 | 8.01E-01 |
| RAB6C         | -2.77 | 9.97E-01 | 0.31  | 3.77E-01 | 0.82  | 2.07E-01 |
| KLRF2         | -2.78 | 9.97E-01 | -0.62 | 7.31E-01 | -0.48 | 6.84E-01 |
| RP11-1220K2.2 | -2.97 | 9.99E-01 | -2.13 | 9.83E-01 | -1.33 | 9.09E-01 |
| THAP9         | -2.98 | 9.99E-01 | -0.56 | 7.13E-01 | -0.24 | 5.95E-01 |
| MUC7          | -2.99 | 9.99E-01 | -2.47 | 9.93E-01 | -1.15 | 8.75E-01 |
| NPS           | -3.12 | 9.99E-01 | -0.58 | 7.18E-01 | -0.56 | 7.11E-01 |
| FAM212A       | -3.15 | 9.99E-01 | 0.42  | 3.38E-01 | 0.22  | 4.12E-01 |
| AC006455.1    | -3.37 | 1.00E+00 | 0.51  | 3.04E-01 | 0.46  | 3.22E-01 |
